# Supplementary material for: Games and Simulations in History. Education Today.
Source: publisher site journal article supplement (doi:10.18632/aging.205866), 1975-01-01
Supplement: Supplementary file [file aging-v16i10-205866-supplementary-material-SD2.pdf]

## SUPPLEMENTARY TABLE

Supplementary Table 1. Three-way ANOVA to determine the impact of sex on the number of macrovesicles, the percentage of hepatocytes with microvesicles, the number of inflammatory foci, body weight, food intake, and water consumption.

| Three-way ANOVA     |               |               |              |             |             |                   |
|---------------------|---------------|---------------|--------------|-------------|-------------|-------------------|
| Source of variation | Macrovesicles | Microvesicles | Inflammation | Body weight | Food intake | Water consumption |
| Sex                 | 0.8858        | 0.0266        | 0.1413       | 0.1418      | 0.1797      | 0.0322            |
| Genotype            | 0.0263        | <0.0001       | 0.1094       | 0.1418      | 0.1658      | 0.4497            |
| Age                 | <0.0001       | 0.0001        | 0.3925       | <0.0001     | 0.2511      | 0.0028            |
