# Supplementary material for: Integrated liver and serum proteomics uncover sexual dimorphism and alteration of several immune response proteins in an aging Werner syndrome mouse model
Source: Aging (Albany NY). 2024 May 24;16(10):8417–45. doi: 10.18632/aging.205866 (PMC11164518; doi:10.18632/aging.205866)
Supplement: Supplementary Table 2 [file aging-16-205866-s003.xls]

## Sheet: Column header
Search Results: Results obtained after the search with MaxQuant software. LFQ normalisation is performed. Proteins identifed at 1% FDR
Quantifiable proteins: LFQ intensity for differentially expressed proteins (between male and female) with at least 2 quantifiable peptides
Samples :
Liver extracts of male or female mice.
Mice Groups (male and female) :
FWrn10m	Wrn helicase mutant females at ten months of age
FWrn4m	Wrn helicase mutant females at four months of age
FWT10m	Wild type females at ten months of age
FWT4m	Wild type females at four months of age
MWrn10m	Wrn helicase mutant males at ten months of age
MWrn4m	Wrn helicase mutant males at four months of age
MWT10m	Wild type males at ten months of age
MWT4m	Wild type males at four months of age
2 (Male or female) x 4 conditions - four biological replicates per condition
Injection: 1.25 microgram of each sample in LC-MS/MS Orbitrap Fusion
Run time: 120min (90 min gradient) - Detection-Dependent Acquisition with MS/MS Higher-energy collisional dissociation (HCD) detection IT
Bioinformatic analyses with MaxQuant/Andromeda
Database - Uniprot Mus musculus reference UP000000589 - 20200705_ 63807 entries-
Modifications: Fixed : Carbamidometyl (Cys), Variable : Oxidation(M), Acetyl (Prot N-term)
Quantification from 'LFQ Intensity' values ​at the protein level
Processing of raw data
Normalisation: performed by MaxQuant software (LFQ intensity)
Replacement of missing values: Missing values ​are replaced with a noise value corresponding to the 1st percentile of the values ​for each column (Red colored LFQ values in the table)
Quantifiable proteins: quantification only if at least four intensity values in the four replicates of one of the two conditions being compared were present and if two peptides or more were identified.
Column header	Description
ACCESSION	UniProt accession number for the leading protein of the group
PROTEIN_IDS	All the protein UniProt accession number for the group
PROTEIN_NAMES	Protein names for the group
GENE_NAMES	Gene names for the proteins of the group
FASTA_HEADERS	Fasta description for the group
PEPTIDES_RAZOR_UNIQUE	Number of razor and unique peptides identified and used for the quantification of the protein group
FWrn10m_2868	LFQ intensities, normalized and imputed.
FWrn10m_2869
FWrn10m_2870
FWrn10m_2871
FWrn4m_3065
FWrn4m_3066
FWrn4m_3082
FWrn4m_3083
FWT10m_2854
FWT10m_2856
FWT10m_2882
FWT10m_2883
FWT4m_3002
FWT4m_3003
FWT4m_3021
FWT4m_3022
MWrn10m_2970
MWrn10m_2971
MWrn10m_2972
MWrn10m_2973
MWrn4m_3026
MWrn4m_3029
MWrn4m_3123
MWrn4m_3124
MWT10m_3048
MWT10m_3049
MWT10m_3051
MWT10m_3052
MWT4m_3000
MWT4m_3001
MWT4m_3014
MWT4m_3017

## Sheet: Supplementary Table 2
Supplementary Table 2. List of quantified proteins in the liver of all males and females with at least two peptides.
Accession	ProteinIDs	ProteinNames	GeneNames	FastaHeaders	RazorUniquePeptides	FWrn10m_2868	FWrn10m_2869	FWrn10m_2870	FWrn10m_2871	FWrn4m_3065	FWrn4m_3066	FWrn4m_3082	FWrn4m_3083	FWT10m_2854	FWT10m_2856	FWT10m_2882	FWT10m_2883	FWT4m_3002	FWT4m_3003	FWT4m_3021	FWT4m_3022	MWrn10m_2970	MWrn10m_2971	MWrn10m_2972	MWrn10m_2973	MWrn4m_3026	MWrn4m_3029	MWrn4m_3123	MWrn4m_3124	MWT10m_3048	MWT10m_3049	MWT10m_3051	MWT10m_3052	MWT4m_3000	MWT4m_3001	MWT4m_3014	MWT4m_3017
Q9Z0N2	Q9Z0N2	Eukaryotic translation initiation factor 2 subunit 3, Y-linked	Eif2s3y	sp|Q9Z0N2|IF2H_MOUSE Eukaryotic translation initiation factor 2 subunit 3, Y-linked OS=Mus musculus OX=10090 GN=Eif2s3y PE=1 SV=2	2	490483	430182	396905	356080	346898	499532	560352	319865	360188	350936	336680	361612	400566	376107	409718	389028	23913000	26979000	13140000	21411000	26690000	27380000	16129000	18297000	20175000	8617300	17344000	23254000	28001000	18426000	31216000	30116000
P11714	P11714;A0A2R8VHW1;A0A2R8VHT2;A0A2R8W6Y8;A0A2R8VHS2;A0A2R8VHD8;A0A2R8VI52	Cytochrome P450 2D9	Cyp2d9	sp|P11714|CP2D9_MOUSE Cytochrome P450 2D9 OS=Mus musculus OX=10090 GN=Cyp2d9 PE=1 SV=2;tr|A0A2R8VHW1|A0A2R8VHW1_MOUSE Cytochrome P450 2D9 OS=Mus musculus OX=10090 GN=Cyp2d9 PE=1 SV=1;tr|A0A2R8VHT2|A0A2R8VHT2_MOUSE Cytochrome P450 2D9 (Fragment) OS=Mus musc	17	812520	430182	664970	356080	1420100	499532	560352	319865	360188	350936	336680	361612	1420500	376107	181100	389028	63178000	387480000	36630000	254580000	94116000	87445000	136860000	34181000	87091000	35974000	80222000	60683000	365870000	153170000	125530000	67489000
A2AKN8	A2AKN8;E9PVW0	Major urinary protein 8	Mup8	tr|A2AKN8|A2AKN8_MOUSE Major urinary protein 5 OS=Mus musculus OX=10090 GN=Mup8 PE=3 SV=1;tr|E9PVW0|E9PVW0_MOUSE Major urinary protein 8 OS=Mus musculus OX=10090 GN=Mup8 PE=3 SV=2	2	490483	430182	396905	356080	9514500	499532	560352	319865	360188	350936	336680	361612	400566	376107	409718	389028	46414000	30338000	15632000	41221000	222210000	108860000	325790000	524640000	606700000	62535000	458730000	854210000	154820000	75799000	128810000	260420000
Q9D8W7	Q9D8W7;A0A0J9YU93;A0A0J9YUI7;A0A0J9YU56	OCIA domain-containing protein 2	Ociad2	sp|Q9D8W7|OCAD2_MOUSE OCIA domain-containing protein 2 OS=Mus musculus OX=10090 GN=Ociad2 PE=1 SV=1;tr|A0A0J9YU93|A0A0J9YU93_MOUSE OCIA domain-containing protein 2 OS=Mus musculus OX=10090 GN=Ociad2 PE=1 SV=1	5	9150900	31669000	25756000	13862000	23829000	25222000	20407000	19575000	12747000	11997000	27737000	22173000	23245000	15196000	17678000	17245000	127800000	80323000	118540000	83883000	79940000	88869000	81696000	79633000	64479000	81843000	79659000	79914000	69018000	80326000	104050000	85130000
A2A998	A2A998;A2A997;Q8K182	Complement component C8 alpha chain	C8a	tr|A2A998|A2A998_MOUSE Complement component C8 alpha chain OS=Mus musculus OX=10090 GN=C8a PE=1 SV=1;tr|A2A997|A2A997_MOUSE Complement component C8 alpha chain OS=Mus musculus OX=10090 GN=C8a PE=1 SV=1;sp|Q8K182|CO8A_MOUSE Complement component C8 alpha cha	7	490483	430182	396905	356080	3147600	499532	560352	319865	360188	350936	336680	361612	400566	376107	2350900	389028	5827100	8032500	4702700	10522000	7365700	6991800	9121300	7269900	18233000	15078000	8365300	15324000	9668600	9425700	5699200	8163100
P19157	P19157;A0A494BAW2;A0A494B908;P46425;A0A494BAS3;A0A494BAU3;A0A494BAM8	Glutathione S-transferase P 1;Glutathione S-transferase P 2	Gstp1;Gstp2	sp|P19157|GSTP1_MOUSE Glutathione S-transferase P 1 OS=Mus musculus OX=10090 GN=Gstp1 PE=1 SV=2;tr|A0A494BAW2|A0A494BAW2_MOUSE GST class-pi OS=Mus musculus OX=10090 GN=Gstp1 PE=1 SV=1;tr|A0A494B908|A0A494B908_MOUSE GST class-pi (Fragment) OS=Mus musculus O	16	3738200000	3269200000	3544400000	3288700000	3491600000	5631200000	3275500000	4059800000	3472500000	2815400000	4400200000	3770200000	3699400000	3985700000	4434800000	6781000000	18145000000	10606000000	13006000000	11224000000	48519000000	24961000000	37154000000	43844000000	38863000000	36233000000	28286000000	43052000000	15519000000	32725000000	27176000000	35233000000
Q5FW60	Q5FW60	Major urinary protein 20	Mup20	sp|Q5FW60|MUP20_MOUSE Major urinary protein 20 OS=Mus musculus OX=10090 GN=Mup20 PE=1 SV=1	11	38093000	62637000	80282000	90995000	92357000	57184000	71691000	129440000	111040000	63582000	85794000	94742000	105200000	74336000	156040000	81402000	537360000	316920000	434130000	253560000	1041100000	487450000	813120000	942840000	844310000	811750000	511020000	1529600000	351530000	779930000	550840000	717230000
Q9QXZ6	Q9QXZ6;E9Q0W2;A0A0G2JDD1;Q91YY5	Solute carrier organic anion transporter family member 1A1	Slco1a1	sp|Q9QXZ6|SO1A1_MOUSE Solute carrier organic anion transporter family member 1A1 OS=Mus musculus OX=10090 GN=Slco1a1 PE=1 SV=1;tr|E9Q0W2|E9Q0W2_MOUSE Solute carrier organic anion transporter family member OS=Mus musculus OX=10090 GN=Slco1a1 PE=1 SV=1	16	2575700	794990	3841400	952150	1911400	11469000	4825300	1442400	5004200	350936	3570200	2310300	10724000	3275100	17908000	17463000	106580000	80343000	40756000	74424000	109490000	76929000	147250000	149100000	151390000	101930000	171420000	183850000	174660000	160800000	146920000	167880000
Q8BGL3	Q8BGL3;E9QAK1;B1PQU4;A0A1B0GSR1	Sulfotransferase	2810007J24Rik	tr|Q8BGL3|Q8BGL3_MOUSE Sulfotransferase OS=Mus musculus OX=10090 GN=Sult2a8 PE=1 SV=1;tr|E9QAK1|E9QAK1_MOUSE Sulfotransferase (Fragment) OS=Mus musculus OX=10090 GN=Sult2a8 PE=1 SV=1	19	5325900	16342000	32766000	25507000	39752000	15258000	43200000	31681000	31716000	22479000	30061000	29504000	39366000	28777000	51689000	20260000	85670000	302770000	91777000	286830000	122500000	137150000	299920000	126090000	332430000	141740000	236760000	169840000	490840000	316690000	202380000	173650000
Q3KQQ2	Q3KQQ2;P04939;P11590	Major urinary protein 3	Mup3	tr|Q3KQQ2|Q3KQQ2_MOUSE Major urinary protein 25 OS=Mus musculus OX=10090 GN=Mup3 PE=1 SV=1;sp|P04939|MUP3_MOUSE Major urinary protein 3 OS=Mus musculus OX=10090 GN=Mup3 PE=1 SV=1	9	54528000	142960000	149740000	140610000	204710000	127060000	155870000	244050000	206800000	124640000	201340000	191450000	198520000	134600000	298180000	166150000	772470000	368220000	530390000	312560000	1280700000	710240000	817650000	1156300000	846890000	571290000	797090000	1089200000	459350000	918100000	658080000	792550000
Q00898	Q00898	Alpha-1-antitrypsin 1-5	Serpina1e	sp|Q00898|A1AT5_MOUSE Alpha-1-antitrypsin 1-5 OS=Mus musculus OX=10090 GN=Serpina1e PE=1 SV=1	7	490483	430182	396905	356080	1016000	8588900	560352	319865	360188	350936	336680	361612	400566	376107	1430700	16823000	7260500	15108000	4588900	9295500	27519000	15750000	90167000	33732000	244000000	191340000	64477000	132430000	58383000	68405000	27329000	34373000
Q01279	Q01279;Q9WVF5	Epidermal growth factor receptor	Egfr	sp|Q01279|EGFR_MOUSE Epidermal growth factor receptor OS=Mus musculus OX=10090 GN=Egfr PE=1 SV=1;tr|Q9WVF5|Q9WVF5_MOUSE Receptor protein-tyrosine kinase OS=Mus musculus OX=10090 GN=Egfr PE=1 SV=1	18	10601000	18456000	7399800	15965000	34402000	52396000	14648000	15429000	18615000	16845000	9911600	16387000	12283000	9827900	41486000	8652100	66040000	137650000	23567000	153770000	104080000	77658000	211540000	148030000	354400000	126510000	109450000	251510000	429250000	170020000	94981000	98413000
Q63880	Q63880;Q63880-2	Carboxylesterase 3A	Ces3a	sp|Q63880|EST3A_MOUSE Carboxylesterase 3A OS=Mus musculus OX=10090 GN=Ces3a PE=1 SV=2;sp|Q63880-2|EST3A_MOUSE Isoform 2 of Carboxylesterase 3A OS=Mus musculus OX=10090 GN=Ces3a	20	624830000	922320000	1072300000	768380000	2432400000	1324500000	1161600000	2071500000	1224400000	834900000	1336100000	1690400000	1756400000	1104000000	2654100000	1761200000	3520600000	1846700000	3836300000	2256200000	5814400000	3422900000	5806400000	5327900000	5378900000	4827100000	4892000000	5731200000	2925800000	5204400000	3727000000	3644600000
B5X0G2	B5X0G2;A2CEK6;L7N222;A2BIN0;P11591	Major urinary protein 17	Mup17;Mup13;Mup11	sp|B5X0G2|MUP17_MOUSE Major urinary protein 17 OS=Mus musculus OX=10090 GN=Mup17 PE=2 SV=2;tr|A2CEK6|A2CEK6_MOUSE Major urinary protein 11 OS=Mus musculus OX=10090 GN=Mup13 PE=3 SV=1;tr|L7N222|L7N222_MOUSE Major urinary protein 13 OS=Mus musculus OX=10090	2	25179000	272190000	299870000	154350000	526180000	40017000	305290000	403660000	172560000	349720000	109330000	197870000	184290000	143390000	241630000	12754000	1105600000	726580000	648730000	978950000	5153700000	2153600000	7472200000	7177900000	7014600000	917480000	4213300000	10849000000	2852200000	1689800000	1921100000	3362600000
P33267	P33267;A0A0U1RPL9	Cytochrome P450 2F2	Cyp2f2	sp|P33267|CP2F2_MOUSE Cytochrome P450 2F2 OS=Mus musculus OX=10090 GN=Cyp2f2 PE=1 SV=1;tr|A0A0U1RPL9|A0A0U1RPL9_MOUSE Cytochrome P450 2F2 (Fragment) OS=Mus musculus OX=10090 GN=Cyp2f2 PE=1 SV=2	27	17330000	46104000	45497000	36070000	62948000	22539000	70576000	45347000	46985000	55830000	36586000	35530000	41272000	40614000	44970000	20797000	76039000	299220000	93266000	224190000	102410000	97687000	181180000	94271000	158520000	107050000	82572000	84783000	264430000	139870000	128870000	83905000
Q9DCY0	Q9DCY0;D3Z4V9;D3Z1F5	Glycine N-acyltransferase-like protein Keg1	Keg1	sp|Q9DCY0|KEG1_MOUSE Glycine N-acyltransferase-like protein Keg1 OS=Mus musculus OX=10090 GN=Keg1 PE=1 SV=1;tr|D3Z4V9|D3Z4V9_MOUSE Glycine N-acyltransferase (Fragment) OS=Mus musculus OX=10090 GN=Keg1 PE=1 SV=8;tr|D3Z1F5|D3Z1F5_MOUSE Glycine N-acyltransfer	12	4394000	664780	331430	1675800	5687300	173290	18449000	831000	4242500	5196500	225280	3102600	544860	1102000	15224000	6631400	53081000	231970000	29100000	247030000	13151000	65167000	67499000	44159000	63223000	37736000	63072000	19217000	285930000	47958000	26071000	20305000
Q3UNX5	Q3UNX5;Q3UNX5-2	Acyl-coenzyme A synthetase ACSM3, mitochondrial	Acsm3	sp|Q3UNX5|ACSM3_MOUSE Acyl-coenzyme A synthetase ACSM3, mitochondrial OS=Mus musculus OX=10090 GN=Acsm3 PE=1 SV=2;sp|Q3UNX5-2|ACSM3_MOUSE Isoform 2 of Acyl-coenzyme A synthetase ACSM3, mitochondrial OS=Mus musculus OX=10090 GN=Acsm3	15	490483	3016600	8031800	3568500	6461900	3641700	12829000	3434800	8818200	8537500	2537600	7872700	9891200	11207000	3163000	2646600	15152000	66205000	14496000	43339000	36704000	22299000	40946000	28527000	17421000	15741000	27686000	22213000	66803000	42561000	25760000	32871000
P33146	P33146	Cadherin-15	Cdh15	sp|P33146|CAD15_MOUSE Cadherin-15 OS=Mus musculus OX=10090 GN=Cdh15 PE=1 SV=3	2	490483	430182	396905	356080	42885000	499532	560352	319865	360188	28832000	17040000	35115000	11438000	376107	409718	389028	40440000	23693000	31650000	28137000	85987000	64637000	83093000	98403000	104160000	88499000	65951000	86186000	35872000	66622000	86079000	78124000
A2CEK7	A2CEK7	Major urinary protein 14	Mup14	tr|A2CEK7|A2CEK7_MOUSE Major urinary protein 12 OS=Mus musculus OX=10090 GN=Mup14 PE=3 SV=1	21	290600000	771610000	845300000	846890000	1939300000	502790000	1149500000	1670400000	927770000	826300000	935450000	1227900000	1208700000	800450000	1508100000	362690000	2412900000	1348200000	1820100000	1773000000	5153400000	3435300000	6455000000	7472300000	7935800000	1564300000	5198300000	10475000000	2761600000	2722000000	2859900000	4712400000
Q8R084	Q8R084	UDP-glucuronosyltransferase 2b1	Ugt2b1	tr|Q8R084|Q8R084_MOUSE UDP-glucuronosyltransferase OS=Mus musculus OX=10090 GN=Ugt2b1 PE=1 SV=1	17	9760000	16312000	25519000	18865000	23810000	12400000	46416000	15502000	24793000	22744000	21287000	20272000	23163000	24806000	30893000	15961000	26922000	219600000	33328000	219660000	37290000	47229000	103510000	36864000	105880000	50082000	54810000	50274000	320970000	73088000	70837000	55123000
P24456	P24456;A0A2R8VKK3;A0A2R8VHY1;A0A2R8W740;A0A2R8W6W2;A0A2R8VJY6;A0A2R8W703	Cytochrome P450 2D10	Cyp2d10	sp|P24456|CP2DA_MOUSE Cytochrome P450 2D10 OS=Mus musculus OX=10090 GN=Cyp2d10 PE=1 SV=2;tr|A0A2R8VKK3|A0A2R8VKK3_MOUSE Cytochrome P450 2D10 OS=Mus musculus OX=10090 GN=Cyp2d10 PE=1 SV=1;tr|A0A2R8VHY1|A0A2R8VHY1_MOUSE Cytochrome P450 2D10 (Fragment) OS=Mus	19	37087000	48827000	61118000	61662000	78013000	38865000	146480000	50554000	54756000	63282000	51284000	63539000	62406000	58839000	67996000	52688000	69686000	586680000	70304000	478760000	95782000	102020000	158070000	54779000	140830000	92464000	82245000	64083000	539520000	185250000	120070000	70086000
K9J7B2	K9J7B2	UDP-glucuronosyltransferase	Ugt1a6b	tr|K9J7B2|K9J7B2_MOUSE UDP-glucuronosyltransferase OS=Mus musculus OX=10090 GN=Ugt1a6b PE=1 SV=1	5	3771500	8389900	10731000	6248500	10761000	499532	19868000	6858200	5576200	9216700	7350800	10296000	8543100	9959400	11382000	4262400	9442400	142330000	15103000	113240000	7267200	15452000	26949000	12889000	22230000	12651000	16364000	11774000	150390000	24270000	17696000	10556000
Q5YD48-2	Q5YD48-2;Q5YD48;Q5YD48-3;A0A286YDF7;S4R2P5;S4R1Y9;P86049	APOBEC1 complementation factor	A1cf	sp|Q5YD48-2|A1CF_MOUSE Isoform 2 of APOBEC1 complementation factor OS=Mus musculus OX=10090 GN=A1cf;sp|Q5YD48|A1CF_MOUSE APOBEC1 complementation factor OS=Mus musculus OX=10090 GN=A1cf PE=1 SV=2;sp|Q5YD48-3|A1CF_MOUSE Isoform 3 of APOBEC1 complementation f	11	617740	603420	2019800	742510	826690	499532	3507300	586360	679460	680110	876020	552540	400566	376107	584540	389028	2086100	61097000	3196800	69162000	489960	1877200	2712900	604080	5971600	1180000	2107900	1765000	53195000	709280	787340	886950
E9Q5K4	E9Q5K4;E9Q5K4-2	Cytochrome P450 2C44	Cyp2c44	sp|E9Q5K4|CP2CN_MOUSE Cytochrome P450 2C44 OS=Mus musculus OX=10090 GN=Cyp2c23 PE=1 SV=1;sp|E9Q5K4-2|CP2CN_MOUSE Isoform 2 of Cytochrome P450 2C44 OS=Mus musculus OX=10090 GN=Cyp2c23	11	476950	430182	125090	723280	1810900	577460	2527900	188340	360188	350936	957350	346890	124350	395150	2722000	2584700	217560	76756000	738350	51751000	293450	1488400	3363200	938370	6328200	3685700	1264800	915760	45224000	4207100	5727200	1260900
Q64458	Q64458;Q3UT49;H3BLM0;P56656	Cytochrome P450 2C29	Cyp2c29	sp|Q64458|CP2CT_MOUSE Cytochrome P450 2C29 OS=Mus musculus OX=10090 GN=Cyp2c29 PE=1 SV=2;tr|Q3UT49|Q3UT49_MOUSE Cytochrome P450 2C29 OS=Mus musculus OX=10090 GN=Cyp2c29 PE=1 SV=1	19	12859000	25615000	25282000	39302000	27119000	17627000	110680000	20432000	27804000	28184000	36980000	19789000	23314000	23984000	24354000	21284000	30408000	533740000	33411000	435890000	29470000	60924000	71091000	33994000	78965000	23524000	29396000	23426000	451060000	59094000	81274000	36096000
Q8CAQ8-2	Q8CAQ8-2;E9Q800;Q8CAQ8-3;Q8CAQ8;Q8CAQ8-5;E9QAY6;A0A0U1RP81;A0A1B0GX08;A0A0U1RQ14;E9PVS5;Q8CAQ8-4	MICOS complex subunit Mic60	Immt	sp|Q8CAQ8-2|MIC60_MOUSE Isoform 2 of MICOS complex subunit Mic60 OS=Mus musculus OX=10090 GN=Immt;tr|E9Q800|E9Q800_MOUSE MICOS complex subunit MIC60 OS=Mus musculus OX=10090 GN=Immt PE=1 SV=1;sp|Q8CAQ8-3|MIC60_MOUSE Isoform 3 of MICOS complex subunit Mic60	19	284890	212970	470070	149570	326410	325880	3353800	837000	225000	1137100	324070	278060	405770	938200	354360	610710	283320	119390000	1688300	114220000	580933	3882600	2675800	498150	1049500	215010	451250	689580	67763000	1403200	6776100	1511900
Q64435	Q64435	UDP-glucuronosyltransferase 1-6	Ugt1a6	sp|Q64435|UD16_MOUSE UDP-glucuronosyltransferase 1-6 OS=Mus musculus OX=10090 GN=Ugt1a6 PE=1 SV=1	12	5717100	15860000	15766000	4630900	10218000	1270100	45352000	12015000	13032000	14429000	12103000	17842000	16587000	13810000	22622000	9090800	11914000	251110000	19543000	207460000	4092900	26864000	34714000	14082000	41505000	20512000	18978000	15625000	208780000	55862000	28591000	17970000
Q6PB66	Q6PB66;F6V2A3	Leucine-rich PPR motif-containing protein, mitochondrial	Lrpprc	sp|Q6PB66|LPPRC_MOUSE Leucine-rich PPR motif-containing protein, mitochondrial OS=Mus musculus OX=10090 GN=Lrpprc PE=1 SV=2	38	528530	512470	549780	925440	828810	1002800	7480600	936560	570090	765800	489130	361612	264890	958170	601220	373580	747220	80071000	937410	70128000	931420	1302300	2883700	728370	2154900	2309100	1202700	691210	82190000	2102300	1922500	439570
Q9EQH3	Q9EQH3	Vacuolar protein sorting-associated protein 35	Vps35	sp|Q9EQH3|VPS35_MOUSE Vacuolar protein sorting-associated protein 35 OS=Mus musculus OX=10090 GN=Vps35 PE=1 SV=1	19	6910600	5315300	2396200	2740200	2812500	2461100	5607200	1988000	930100	3681800	5291500	874350	1670100	2377300	2487800	4790600	5570400	56463000	5501000	57508000	3502700	4413400	4924200	6851300	6245200	4642000	8023800	814380	57528000	3185500	3713800	4695800
Q9DBG1	Q9DBG1	Sterol 26-hydroxylase, mitochondrial	Cyp27a1	sp|Q9DBG1|CP27A_MOUSE Sterol 26-hydroxylase, mitochondrial OS=Mus musculus OX=10090 GN=Cyp27a1 PE=1 SV=1	20	490483	2790200	392330	1974100	3736800	895900	18996000	2310700	3430100	2198900	3357600	351680	3260300	2830300	4256200	1688800	544080	264430000	2615400	252920000	389130	7913800	14670000	2647200	16768000	3672500	5026800	6612500	320940000	9612500	17646000	4471900
P00186	P00186	Cytochrome P450 1A2	Cyp1a2	sp|P00186|CP1A2_MOUSE Cytochrome P450 1A2 OS=Mus musculus OX=10090 GN=Cyp1a2 PE=1 SV=1	15	5604800	9305800	14677000	18449000	16608000	5711700	51528000	12364000	18291000	11012000	13520000	10803000	16863000	14014000	16041000	7502100	9813700	137650000	6707600	110610000	18352000	19614000	40118000	16427000	37362000	10963000	23055000	18738000	226700000	30993000	30517000	16262000
Q8VC30	Q8VC30;Q3UTZ4;A0A494BBI2;A0A494BB96	Bifunctional ATP-dependent dihydroxyacetone kinase/FAD-AMP lyase (cyclizing);ATP-dependent dihydroxyacetone kinase;FAD-AMP lyase (cyclizing)	Dak	sp|Q8VC30|TKFC_MOUSE Triokinase/FMN cyclase OS=Mus musculus OX=10090 GN=Tkfc PE=1 SV=1;tr|Q3UTZ4|Q3UTZ4_MOUSE ATP-dependent dihydroxyacetone kinase OS=Mus musculus OX=10090 GN=Tkfc PE=1 SV=1	25	34654000	69947000	56043000	64076000	60088000	27634000	130850000	43996000	59514000	75709000	51021000	69366000	49218000	60160000	52025000	49196000	67930000	740210000	89074000	630450000	40811000	77211000	96749000	46446000	95562000	52412000	71848000	59227000	545340000	95286000	119250000	69053000
Q99JR1	Q99JR1	Sideroflexin-1	Sfxn1	sp|Q99JR1|SFXN1_MOUSE Sideroflexin-1 OS=Mus musculus OX=10090 GN=Sfxn1 PE=1 SV=3	10	490483	996650	2637400	3735100	3826700	309470	16353000	2224600	2817200	3556200	382530	671930	288640	325870	3627500	2072400	587880	93088000	2571600	53269000	1533200	3675100	7057100	1905600	4824300	3221000	1939400	2247300	37963000	5520500	5668000	1761100
Q05421	Q05421;A0A1B0GSV7;Q0PGA1	Cytochrome P450 2E1	Cyp2e1	sp|Q05421|CP2E1_MOUSE Cytochrome P450 2E1 OS=Mus musculus OX=10090 GN=Cyp2e1 PE=1 SV=1;tr|A0A1B0GSV7|A0A1B0GSV7_MOUSE 4-nitrophenol 2-hydroxylase OS=Mus musculus OX=10090 GN=Cyp2e1 PE=1 SV=1;tr|Q0PGA1|Q0PGA1_MOUSE 4-nitrophenol 2-hydroxylase OS=Mus musculu	19	18269000	51077000	44718000	54059000	64266000	22111000	165470000	36124000	49607000	49087000	53307000	50742000	50798000	53390000	49475000	29899000	41668000	617160000	51664000	656170000	53639000	66580000	86195000	38217000	108120000	46398000	63054000	55900000	596740000	82096000	75219000	42877000
Q91YX5	Q91YX5;E9QL80;D3YVK0	Acyl-CoA:lysophosphatidylglycerol acyltransferase 1	Lpgat1	sp|Q91YX5|LGAT1_MOUSE Acyl-CoA:lysophosphatidylglycerol acyltransferase 1 OS=Mus musculus OX=10090 GN=Lpgat1 PE=1 SV=1;tr|E9QL80|E9QL80_MOUSE Acyl-CoA:lysophosphatidylglycerol acyltransferase 1 OS=Mus musculus OX=10090 GN=Lpgat1 PE=1 SV=1	5	5754	21687	5763.7	9151.8	24465	44912	406570	4453.9	15868	6633.7	5241.8	26687	42355	6681.4	3932.8	3137.2	342233	29608000	312879	22974000	580933	3442.3	26665	478808	13647	344674	5492.4	6141.4	3086900	5612.1	3366	5629.8
A0A075B5K2	A0A075B5K2;A0A0G2JDR3	Immunoglobulin kappa chain variable 9-124	Igkv9-124	tr|A0A075B5K2|A0A075B5K2_MOUSE Immunoglobulin kappa chain variable 9-124 OS=Mus musculus OX=10090 GN=Igkv9-124 PE=1 SV=7;tr|A0A0G2JDR3|A0A0G2JDR3_MOUSE Immunoglobulin kappa chain variable 9-124 (Fragment) OS=Mus musculus OX=10090 GN=Igkv9-124 PE=1 SV=4	3	51052000	430182	30363000	36388000	346898	27928000	560352	319865	360188	11287000	336680	4477400	400566	376107	409718	8297200	342233	747486	7543000	746728	580933	385656	323890	478808	466503	6966600	451250	415610	620123	330431	8245900	448316
A0A075B5K5	A0A075B5K5;P01627;P01628	Immunoglobulinkappa chain V-II region VKappa167;Immunoglobulinkappa chain V-II region MOPC 511	Igkv2-112;Gm5153	tr|A0A075B5K5|A0A075B5K5_MOUSE Immunoglobulin kappa variable 2-112 OS=Mus musculus OX=10090 GN=Igkv2-112 PE=1 SV=1;sp|P01627|KV2A2_MOUSE Ig kappa chain V-II region VKappa167 OS=Mus musculus OX=10090 GN=Gm5153 PE=4 SV=1;sp|P01628|KV2A3_MOUSE Ig kappa chain	2	490483	430182	396905	356080	346898	499532	560352	319865	360188	350936	336680	361612	400566	376107	409718	389028	342233	747486	312879	746728	580933	385656	323890	478808	466503	344674	451250	415610	620123	330431	325998	448316
A0A075B5L3	A0A075B5L3	Immunoglobulin kappa chain variable 4-90	Igkv4-90	tr|A0A075B5L3|A0A075B5L3_MOUSE Immunoglobulin kappa chain variable 4-90 (Fragment) OS=Mus musculus OX=10090 GN=Igkv4-90 PE=4 SV=5	1	490483	430182	396905	356080	346898	499532	560352	319865	360188	350936	336680	361612	400566	376107	409718	389028	342233	747486	312879	746728	580933	385656	323890	478808	466503	344674	451250	415610	620123	330431	325998	448316
A0A075B5L7	A0A075B5L7	Immunoglobulin kappa variable 4-80	Igkv4-80	tr|A0A075B5L7|A0A075B5L7_MOUSE Immunoglobulin kappa variable 4-80 (Fragment) OS=Mus musculus OX=10090 GN=Igkv4-80 PE=4 SV=2	1	490483	430182	396905	356080	346898	499532	560352	319865	360188	350936	336680	361612	400566	376107	409718	389028	342233	747486	312879	746728	580933	385656	323890	478808	466503	344674	451250	415610	620123	330431	325998	448316
A0A075B5M1	A0A075B5M1	Immunoglobulin kappa variable 4-63	Igkv4-63	tr|A0A075B5M1|A0A075B5M1_MOUSE Immunoglobulin kappa variable 4-63 OS=Mus musculus OX=10090 GN=Igkv4-63 PE=1 SV=1	1	490483	430182	396905	356080	346898	499532	560352	319865	360188	350936	336680	361612	400566	376107	409718	389028	342233	747486	312879	746728	580933	385656	323890	478808	466503	344674	451250	415610	620123	330431	325998	448316
A0A075B5M2	A0A075B5M2;A0A0G2JH00;L7N239;J3QNZ9;A0A075B5M3;A0A0G2JGI6;A0A075B5L2;P01680	Immunoglobulin kappa chain variable 4-61	Igkv4-61	tr|A0A075B5M2|A0A075B5M2_MOUSE Immunoglobulin kappa chain variable 4-61 OS=Mus musculus OX=10090 GN=Igkv4-61 PE=4 SV=7;tr|A0A0G2JH00|A0A0G2JH00_MOUSE Immunoglobulin kappa chain variable 4-61 (Fragment) OS=Mus musculus OX=10090 GN=Igkv4-61 PE=4 SV=1	3	490483	389390000	5108500	7030700	3904800	13915000	4017600	319865	6724000	5662300	336680	2151000	400566	376107	409718	3907200	342233	747486	3974800	746728	580933	385656	323890	478808	4347100	2557400	451250	415610	620123	330431	325998	448316
A0A075B5M4	A0A075B5M4	Immunoglobulin kappa variable 4-57-1	Igkv4-57-1	tr|A0A075B5M4|A0A075B5M4_MOUSE Immunoglobulin kappa variable 4-57-1 (Fragment) OS=Mus musculus OX=10090 GN=Igkv4-57-1 PE=4 SV=1	1	490483	430182	396905	356080	346898	499532	560352	319865	360188	350936	336680	361612	400566	376107	409718	389028	342233	747486	312879	746728	580933	385656	323890	478808	466503	344674	451250	415610	620123	330431	325998	448316
A0A075B5N4	A0A075B5N4;A0A140T8P7;A0A0G2JF28;A0A140T8M3;A0A140T8P5	Immunoglobulin kappa chain variable 8-27	Igkv8-27	tr|A0A075B5N4|A0A075B5N4_MOUSE Immunoglobulin kappa chain variable 8-27 OS=Mus musculus OX=10090 GN=Igkv8-27 PE=4 SV=1;tr|A0A140T8P7|A0A140T8P7_MOUSE Immunoglobulin kappa variable 8-21 (Fragment) OS=Mus musculus OX=10090 GN=Igkv8-21 PE=1 SV=2;tr|A0A0G2JF28	1	16563000	10041000	143410000	356080	346898	16635000	5467700	319865	360188	79786000	12555000	1946800	400566	376107	98955000	389028	342233	747486	312879	746728	580933	385656	323890	15171000	466503	7088600	451250	415610	5221300	330431	325998	448316
A0A075B5P1	A0A075B5P1	Immunoglobulin kappa variable 3-1	Igkv3-1	tr|A0A075B5P1|A0A075B5P1_MOUSE Immunoglobulin kappa variable 3-1 (Fragment) OS=Mus musculus OX=10090 GN=Igkv3-1 PE=1 SV=7	1	490483	430182	396905	356080	346898	499532	560352	319865	360188	350936	336680	361612	400566	376107	409718	389028	342233	747486	312879	746728	580933	385656	323890	478808	466503	344674	451250	415610	620123	330431	325998	448316
A0A075B5P9	A0A075B5P9;A0A075B5Q9;A0A0A6YWC7;A0A075B5Q4;P18527;P18529;P18525	Immunoglobulinheavy chain V region 914;Immunoglobulinheavy chain V region 5-76;Immunoglobulinheavy chain V region 5-84	Ighv5-4;Ighv5-15;Ighv5-12	tr|A0A075B5P9|A0A075B5P9_MOUSE Immunoglobulin heavy variable 5-4 (Fragment) OS=Mus musculus OX=10090 GN=Ighv5-4 PE=4 SV=1;tr|A0A075B5Q9|A0A075B5Q9_MOUSE Immunoglobulin heavy variable 5-15 OS=Mus musculus OX=10090 GN=Ighv5-15 PE=4 SV=1;tr|A0A0A6YWC7|A0A0A6Y	1	490483	430182	396905	356080	61931000	16163000	560352	319865	360188	350936	336680	361612	400566	376107	409718	16996000	342233	747486	312879	746728	580933	25803000	323890	23409000	466503	12305000	451250	415610	620123	330431	325998	448316
A0A075B5Q5	A0A075B5Q5	Immunoglobulin heavy variable 2-9	Ighv2-9	tr|A0A075B5Q5|A0A075B5Q5_MOUSE Immunoglobulin heavy variable 2-9 (Fragment) OS=Mus musculus OX=10090 GN=Ighv2-9 PE=4 SV=1	2	490483	430182	396905	356080	346898	499532	560352	319865	360188	350936	336680	361612	400566	376107	409718	389028	342233	747486	312879	746728	580933	385656	323890	478808	466503	344674	451250	415610	620123	330431	325998	448316
A0A075B5Q6	A0A075B5Q6;A0A0A6YVS4	Immunoglobulin heavy variable 5-9-1	Ighv5-9-1	tr|A0A075B5Q6|A0A075B5Q6_MOUSE Immunoglobulin heavy variable 5-9-1 OS=Mus musculus OX=10090 GN=Ighv5-9-1 PE=1 SV=1;tr|A0A0A6YVS4|A0A0A6YVS4_MOUSE Immunoglobulin heavy variable 5-9-1 (Fragment) OS=Mus musculus OX=10090 GN=Ighv5-9-1 PE=1 SV=1	3	2205600	430182	8888700	356080	5102800	17375000	6098400	319865	360188	350936	336680	2380500	400566	8970500	409718	389028	342233	747486	2341700	1762100	580933	385656	323890	478808	4541700	344674	3556700	32496000	620123	330431	325998	448316
A0A075B5R1	A0A075B5R1	Immunoglobulin heavy variable 5-17	Ighv5-17	tr|A0A075B5R1|A0A075B5R1_MOUSE Immunoglobulin heavy variable 5-17 (Fragment) OS=Mus musculus OX=10090 GN=Ighv5-17 PE=1 SV=1	3	11755000	430182	396905	356080	4342300	6185400	560352	319865	360188	350936	1582900	361612	400566	67342000	409718	389028	342233	2828100	312879	746728	580933	385656	323890	478808	2749200	380070000	451250	19756000	620123	330431	3105600	448316
A0A075B5R3	A0A075B5R3;A0A0A6YX91;A0A075B5R2;P01786	Immunoglobulinheavy chain V region MOPC 47A	Ighv7-2;Ighv7-3	tr|A0A075B5R3|A0A075B5R3_MOUSE Immunoglobulin heavy variable 7-2 OS=Mus musculus OX=10090 GN=Ighv7-2 PE=4 SV=1;tr|A0A0A6YX91|A0A0A6YX91_MOUSE Immunoglobulin heavy variable 7-2 (Fragment) OS=Mus musculus OX=10090 GN=Ighv7-2 PE=4 SV=1;tr|A0A075B5R2|A0A075B5R	1	490483	6252500	3004400	356080	346898	499532	560352	319865	360188	350936	336680	361612	400566	376107	409718	389028	342233	747486	312879	746728	580933	385656	323890	478808	466503	2605200	451250	415610	620123	330431	325998	448316
A0A075B5S9	A0A075B5S9;A0A0A6YWH6	Immunoglobulin heavy variable 9-4	Ighv9-4	tr|A0A075B5S9|A0A075B5S9_MOUSE Immunoglobulin heavy variable 9-4 OS=Mus musculus OX=10090 GN=Ighv9-4 PE=4 SV=1;tr|A0A0A6YWH6|A0A0A6YWH6_MOUSE Immunoglobulin heavy variable 9-4 (Fragment) OS=Mus musculus OX=10090 GN=Ighv9-4 PE=4 SV=1	1	490483	430182	396905	356080	346898	499532	560352	319865	360188	350936	336680	361612	400566	376107	409718	389028	342233	747486	312879	746728	580933	385656	323890	478808	466503	344674	451250	415610	620123	330431	325998	448316
A0A075B5T3	A0A075B5T3;P01800;P01799;P01797;P01796;P01802;P01801;P01804;P01803	Immunoglobulinheavy chain V-III region T957;Immunoglobulinheavy chain V-III region ABE-47N;Immunoglobulinheavy chain V-III region U61;Immunoglobulinheavy chain V-III region A4;Immunoglobulinheavy chain V-III region W3082;Immunoglobulinheavy chain V-III region J606;Immunoglobulinheavy chain V-III region HPC76;Immunoglobulinheavy chain V region AMPC1	Ighv6-6	tr|A0A075B5T3|A0A075B5T3_MOUSE Immunoglobulin heavy variable 6-6 (Fragment) OS=Mus musculus OX=10090 GN=Ighv6-6 PE=4 SV=1;sp|P01800|HVM31_MOUSE Ig heavy chain V-III region T957 OS=Mus musculus OX=10090 PE=1 SV=2;sp|P01799|HVM30_MOUSE Ig heavy chain V-III r	2	26411000	4559700	11318000	7955800	1907800	20139000	560352	319865	8435500	9142300	336680	9160100	400566	376107	409718	8603100	342233	747486	312879	746728	580933	385656	323890	478808	5377400	9159000	6415800	415610	620123	1896100	6369200	448316
A0A075B5V8	A0A075B5V8;A0A0A6YY41	Immunoglobulin heavy variable 1-47	Ighv1-47	tr|A0A075B5V8|A0A075B5V8_MOUSE Immunoglobulin heavy variable 1-47 OS=Mus musculus OX=10090 GN=Ighv1-47 PE=4 SV=1;tr|A0A0A6YY41|A0A0A6YY41_MOUSE Immunoglobulin heavy variable 1-47 (Fragment) OS=Mus musculus OX=10090 GN=Ighv1-47 PE=4 SV=1	1	490483	430182	396905	356080	346898	499532	560352	319865	360188	350936	336680	361612	400566	5393200	409718	389028	22273000	747486	312879	746728	6875900	385656	5967700	478808	466503	344674	451250	415610	620123	330431	325998	448316
A0A075B5V9	A0A075B5V9;A0A0A6YWX2	Immunoglobulin heavy variable 1-49	Ighv1-49	tr|A0A075B5V9|A0A075B5V9_MOUSE Immunoglobulin heavy variable 1-49 OS=Mus musculus OX=10090 GN=Ighv1-49 PE=4 SV=1;tr|A0A0A6YWX2|A0A0A6YWX2_MOUSE Immunoglobulin heavy variable 1-49 (Fragment) OS=Mus musculus OX=10090 GN=Ighv1-49 PE=4 SV=1	1	490483	430182	396905	356080	346898	499532	560352	319865	360188	350936	336680	361612	400566	376107	409718	389028	342233	747486	312879	746728	580933	385656	323890	478808	466503	344674	451250	415610	620123	330431	325998	448316
A0A075B5X6	A0A075B5X6;A0A0G2JFN9	Immunoglobulin heavy variable V1-67	Ighv1-67	tr|A0A075B5X6|A0A075B5X6_MOUSE Immunoglobulin heavy variable V1-67 OS=Mus musculus OX=10090 GN=Ighv1-67 PE=4 SV=1;tr|A0A0G2JFN9|A0A0G2JFN9_MOUSE Immunoglobulin heavy variable V1-67 (Fragment) OS=Mus musculus OX=10090 GN=Ighv1-67 PE=4 SV=1	1	490483	430182	396905	356080	346898	4774200	560352	14183000	360188	350936	336680	361612	400566	376107	409718	389028	342233	747486	312879	746728	580933	385656	323890	478808	466503	344674	451250	415610	620123	330431	325998	448316
A0A075B5X7	A0A075B5X7;A0A0G2JFS5;A0A075B5W1	Immunoglobulin heavy variable 1-69	Ighv1-69;Ighv1-50	tr|A0A075B5X7|A0A075B5X7_MOUSE Immunoglobulin heavy variable 1-69 OS=Mus musculus OX=10090 GN=Ighv1-69 PE=4 SV=1;tr|A0A0G2JFS5|A0A0G2JFS5_MOUSE Immunoglobulin heavy variable 1-69 (Fragment) OS=Mus musculus OX=10090 GN=Ighv1-69 PE=4 SV=1;tr|A0A075B5W1|A0A07	1	490483	430182	396905	356080	346898	499532	560352	319865	360188	350936	336680	361612	400566	376107	409718	389028	342233	747486	312879	746728	580933	385656	323890	478808	466503	344674	451250	415610	620123	330431	325998	448316
A0A075B5Y6	A0A075B5Y6;P06327	Immunoglobulinheavy chain V region VH558 A1/A4	Ighv1-85;Gm5629	tr|A0A075B5Y6|A0A075B5Y6_MOUSE Immunoglobulin heavy variable 1-85 (Fragment) OS=Mus musculus OX=10090 GN=Ighv1-85 PE=4 SV=1;sp|P06327|HVM52_MOUSE Ig heavy chain V region VH558 A1/A4 OS=Mus musculus OX=10090 GN=Gm5629 PE=2 SV=1	1	490483	430182	396905	356080	346898	499532	560352	319865	29032000	350936	336680	11099000	400566	376107	409718	389028	342233	747486	312879	746728	580933	385656	323890	478808	466503	344674	451250	415610	620123	330431	325998	448316
A0A075B666	A0A075B666;A0A140T8N3	Immunoglobulin kappa chain variable 13-85	Igkv12-47	tr|A0A075B666|A0A075B666_MOUSE Immunoglobulin kappa chain variable 13-85 (Fragment) OS=Mus musculus OX=10090 GN=Igkv13-85 PE=4 SV=5;tr|A0A140T8N3|A0A140T8N3_MOUSE Immunoglobulin kappa chain variable 13-84 (Fragment) OS=Mus musculus OX=10090 GN=Igkv13-84 PE	2	11984000	430182	10673000	7781400	346898	499532	560352	319865	360188	4758800	336680	361612	400566	376107	409718	389028	342233	747486	312879	746728	580933	385656	323890	478808	466503	344674	66014000	69109000	620123	330431	325998	448316
A0A075B674	A0A075B674;A0A0G2JGN3	Immunoglobulin heavy variable 1-78	Ighv1-78	tr|A0A075B674|A0A075B674_MOUSE Immunoglobulin heavy variable 1-78 OS=Mus musculus OX=10090 GN=Ighv1-78 PE=1 SV=1;tr|A0A0G2JGN3|A0A0G2JGN3_MOUSE Immunoglobulin heavy variable 1-78 (Fragment) OS=Mus musculus OX=10090 GN=Ighv1-78 PE=1 SV=1	1	490483	430182	18570000	356080	346898	499532	560352	319865	17785000	350936	4802800	361612	400566	376107	409718	389028	342233	747486	312879	746728	580933	385656	12472000	478808	466503	344674	451250	415610	620123	330431	325998	448316
A0A075B696	A0A075B696	Immunoglobulin heavy variable 2-3	Ighv2-3	tr|A0A075B696|A0A075B696_MOUSE Immunoglobulin heavy variable 2-3 (Fragment) OS=Mus musculus OX=10090 GN=Ighv2-3 PE=4 SV=3	1	490483	430182	396905	356080	346898	499532	560352	319865	360188	350936	336680	361612	400566	376107	409718	389028	342233	747486	312879	746728	580933	385656	323890	478808	466503	344674	451250	415610	620123	330431	325998	448316
A0A075B697	A0A075B697	Immunoglobulin heavy variable 2-9-1	Ighv2-9-1	tr|A0A075B697|A0A075B697_MOUSE Immunoglobulin heavy variable 2-9-1 (Fragment) OS=Mus musculus OX=10090 GN=Ighv2-9-1 PE=4 SV=1	1	490483	430182	396905	356080	346898	499532	560352	319865	360188	350936	336680	361612	400566	376107	409718	389028	342233	747486	312879	746728	580933	385656	323890	478808	466503	344674	451250	415610	620123	330431	325998	448316
A0A087WNS9	A0A087WNS9;A0A087WQ65;A0A087WRZ2;A0A087WNT2;A0A087WPY4;Q99JA5;Q64253	Lymphocyte antigen 6E	Ly6e	tr|A0A087WNS9|A0A087WNS9_MOUSE Lymphocyte antigen 6E (Fragment) OS=Mus musculus OX=10090 GN=Ly6e PE=1 SV=6;tr|A0A087WQ65|A0A087WQ65_MOUSE Lymphocyte antigen 6E (Fragment) OS=Mus musculus OX=10090 GN=Ly6e PE=1 SV=1;tr|A0A087WRZ2|A0A087WRZ2_MOUSE Lymphocyte	2	14794000	8113100	6627700	356080	15096000	499532	6260900	7868600	360188	7355500	9615100	8530800	8219600	8199200	13742000	10603000	7904500	747486	7012600	746728	580933	385656	7693500	14028000	8408400	8206100	5285500	415610	620123	8111600	10095000	5811300
A0A087WP81	A0A087WP81;Q9WUP7-2;Q9WUP7;A0A087WRL3	Ubiquitin carboxyl-terminal hydrolase isozyme L5	Uchl5	tr|A0A087WP81|A0A087WP81_MOUSE Ubiquitinyl hydrolase 1 (Fragment) OS=Mus musculus OX=10090 GN=Uchl5 PE=1 SV=1;sp|Q9WUP7-2|UCHL5_MOUSE Isoform 2 of Ubiquitin carboxyl-terminal hydrolase isozyme L5 OS=Mus musculus OX=10090 GN=Uchl5;sp|Q9WUP7|UCHL5_MOUSE Ubiq	3	490483	430182	396905	356080	3762200	499532	560352	319865	360188	4108600	336680	361612	6416900	376107	409718	389028	3653800	7253300	312879	12963000	580933	385656	323890	478808	5290500	6369600	4269900	415610	8567400	3524700	325998	448316
A0A087WQ16	A0A087WQ16;E9QPY6;P13705	DNA mismatch repair protein Msh3	Msh3	tr|A0A087WQ16|A0A087WQ16_MOUSE DNA mismatch repair protein OS=Mus musculus OX=10090 GN=Msh3 PE=1 SV=1;tr|E9QPY6|E9QPY6_MOUSE DNA mismatch repair protein OS=Mus musculus OX=10090 GN=Msh3 PE=1 SV=2;sp|P13705|MSH3_MOUSE DNA mismatch repair protein Msh3 OS=Mus	1	490483	430182	126860000	356080	346898	499532	560352	319865	360188	350936	336680	361612	183450000	376107	409718	189610000	342233	747486	312879	746728	580933	385656	323890	478808	466503	344674	451250	415610	620123	330431	325998	448316
A0A087WQH8	A0A087WQH8	Solute carrier family 35, member A4	Slc35a4	tr|A0A087WQH8|A0A087WQH8_MOUSE Probable UDP-sugar transporter protein SLC35A4 OS=Mus musculus OX=10090 GN=Slc35a4 PE=1 SV=1	1	9998600	9576400	6673500	9244800	346898	9358600	560352	9282800	4053500	8213800	8249200	8159200	400566	8355100	12537000	10398000	342233	747486	6524600	746728	10057000	7904200	323890	478808	10561000	344674	8390000	10531000	620123	330431	325998	9417300
A0A087WQS5	A0A087WQS5;Q9CR84;P56384;P56383	ATP synthase F(0) complex subunit C1, mitochondrial;ATP synthase F(0) complex subunit C3, mitochondrial;ATP synthase F(0) complex subunit C2, mitochondrial	Atp5g2;Atp5g1;Atp5g3	tr|A0A087WQS5|A0A087WQS5_MOUSE ATP synthase, H+-transporting, mitochondrial F0 complex, subunit C2 (subunit 9) (Fragment) OS=Mus musculus OX=10090 GN=Atp5g2 PE=3 SV=1;sp|Q9CR84|AT5G1_MOUSE ATP synthase F(0) complex subunit C1, mitochondrial OS=Mus musculus	1	3801900	3740700	6419700	7464200	5280300	3273200	7807200	4859900	4854600	3607400	4439000	4073700	5407800	4053100	4287200	6696900	4035700	11392000	6814000	12228000	3437700	4219500	2903800	478808	11059000	9278800	8749000	6091600	15626000	10152000	4695800	5654200
A0A087WQT0	A0A087WQT0;Q05DP1;O88697;D3YXM1	Serine/threonine-protein kinase 16	Stk16	tr|A0A087WQT0|A0A087WQT0_MOUSE Serine/threonine-protein kinase 16 (Fragment) OS=Mus musculus OX=10090 GN=Stk16 PE=1 SV=1;tr|Q05DP1|Q05DP1_MOUSE Serine/threonine-protein kinase 16 OS=Mus musculus OX=10090 GN=Stk16 PE=1 SV=1;sp|O88697|STK16_MOUSE Serine/thre	2	490483	430182	396905	356080	346898	499532	560352	319865	360188	350936	336680	361612	400566	376107	409718	389028	342233	3473900	312879	2954200	580933	385656	323890	478808	466503	344674	451250	415610	2894300	330431	325998	448316
A0A087WRC6	A0A087WRC6;A0A087WR57;Q91XC8	Death-associated protein 1	Dap	tr|A0A087WRC6|A0A087WRC6_MOUSE Death-associated protein 1 OS=Mus musculus OX=10090 GN=Dap PE=1 SV=1;tr|A0A087WR57|A0A087WR57_MOUSE Death-associated protein 1 OS=Mus musculus OX=10090 GN=Dap PE=1 SV=1;sp|Q91XC8|DAP1_MOUSE Death-associated protein 1 OS=Mus m	1	7235700	7441000	5300800	5248500	7014900	7104000	5756400	6248900	6251600	5128200	6282400	4184800	4108100	5836000	7596300	9095700	4899300	3739800	3641500	1380300	5823500	4002300	4904100	6746200	8348500	5917800	4952200	10634000	4570600	4598100	5256200	8160300
A0A087WRH2	A0A087WRH2;Q9WUD8	Fas apoptotic inhibitory molecule 1	Faim	tr|A0A087WRH2|A0A087WRH2_MOUSE Fas apoptotic inhibitory molecule 1 (Fragment) OS=Mus musculus OX=10090 GN=Faim PE=1 SV=6;sp|Q9WUD8|FAIM1_MOUSE Fas apoptotic inhibitory molecule 1 OS=Mus musculus OX=10090 GN=Faim PE=1 SV=1	1	4426300	430182	3768600	356080	346898	499532	3907000	2926500	4451700	3738800	3593900	3906900	2990800	3618200	3832200	3196600	3270500	1959600	4185600	2175800	580933	3401000	323890	2956800	466503	4923200	451250	2655000	620123	330431	325998	2768700
A0A087WS76	A0A087WS76;A0A140LHL6;E9Q3S4	Mitogen-activated protein kinase kinase kinase 19	Map3k19	tr|A0A087WS76|A0A087WS76_MOUSE Mitogen-activated protein kinase kinase kinase 19 (Fragment) OS=Mus musculus OX=10090 GN=Map3k19 PE=4 SV=2;tr|A0A140LHL6|A0A140LHL6_MOUSE Mitogen-activated protein kinase kinase kinase 19 OS=Mus musculus OX=10090 GN=Map3k19 P	1	118060000	107840000	87286000	101390000	138660000	131570000	104220000	126290000	91952000	103610000	88412000	113030000	102820000	101160000	124660000	124800000	138980000	150950000	106260000	144740000	129470000	119310000	140530000	153400000	132580000	130600000	119590000	120320000	157380000	94179000	90205000	115160000
A0A087WSK7	A0A087WSK7;Q9CQZ0;Q921I0	ORM1-like protein 2;ORM1-like protein 1	Gm28778;Ormdl2;Ormdl1	tr|A0A087WSK7|A0A087WSK7_MOUSE ORM1-like protein 1 (Fragment) OS=Mus musculus OX=10090 GN=Gm28778 PE=3 SV=1;sp|Q9CQZ0|ORML2_MOUSE ORM1-like protein 2 OS=Mus musculus OX=10090 GN=Ormdl2 PE=1 SV=1;sp|Q921I0|ORML1_MOUSE ORM1-like protein 1 OS=Mus musculus OX=	1	490483	430182	396905	356080	346898	499532	560352	319865	360188	350936	336680	2476400	400566	376107	409718	389028	342233	11656000	312879	11432000	580933	385656	323890	478808	466503	344674	451250	415610	11073000	330431	4765200	448316
A0A0A0MQ90	A0A0A0MQ90;P97352	Protein S100-A13	S100a13	tr|A0A0A0MQ90|A0A0A0MQ90_MOUSE Protein S100-A13 OS=Mus musculus OX=10090 GN=S100a13 PE=1 SV=1;sp|P97352|S10AD_MOUSE Protein S100-A13 OS=Mus musculus OX=10090 GN=S100a13 PE=1 SV=1	1	83441000	92293000	75240000	86231000	77484000	112230000	67465000	106600000	91680000	75565000	72082000	65709000	71751000	79284000	63329000	92786000	96714000	47434000	86616000	50700000	94086000	80610000	61325000	80226000	61154000	70080000	59554000	59841000	54094000	63178000	71117000	83805000
A0A0A0MQN1	A0A0A0MQN1;Q5RL79	Keratinocyte-associated protein 2	Krtcap2	tr|A0A0A0MQN1|A0A0A0MQN1_MOUSE Dolichyl-diphosphooligosaccharide--protein glycosyltransferase subunit KCP2 OS=Mus musculus OX=10090 GN=Krtcap2 PE=1 SV=1;sp|Q5RL79|KTAP2_MOUSE Keratinocyte-associated protein 2 OS=Mus musculus OX=10090 GN=Krtcap2 PE=1 SV=2	1	490483	430182	396905	356080	346898	499532	4721700	319865	360188	2580600	336680	361612	400566	376107	409718	389028	342233	22818000	312879	21983000	580933	385656	323890	478808	3274100	344674	451250	415610	14053000	330431	325998	448316
A0A0A6YVS2	A0A0A6YVS2;Q921L3	Transmembrane and coiled-coil domain-containing protein 1	Tmco1	tr|A0A0A6YVS2|A0A0A6YVS2_MOUSE Calcium load-activated calcium channel (Fragment) OS=Mus musculus OX=10090 GN=Tmco1 PE=1 SV=1;sp|Q921L3|TMCO1_MOUSE Calcium load-activated calcium channel OS=Mus musculus OX=10090 GN=Tmco1 PE=1 SV=1	1	490483	430182	396905	356080	346898	499532	560352	319865	360188	350936	336680	361612	400566	376107	409718	389028	342233	747486	312879	746728	580933	385656	323890	478808	466503	344674	451250	415610	620123	330431	325998	448316
A0A0A6YW23	A0A0A6YW23;Q9JKK1-2;Q9JKK1	Syntaxin-6	Stx6	tr|A0A0A6YW23|A0A0A6YW23_MOUSE Syntaxin-6 (Fragment) OS=Mus musculus OX=10090 GN=Stx6 PE=1 SV=1;sp|Q9JKK1-2|STX6_MOUSE Isoform 2 of Syntaxin-6 OS=Mus musculus OX=10090 GN=Stx6;sp|Q9JKK1|STX6_MOUSE Syntaxin-6 OS=Mus musculus OX=10090 GN=Stx6 PE=1 SV=1	1	7362200	12895000	396905	356080	8988900	10527000	560352	319865	9825300	9125700	336680	361612	400566	376107	409718	9217700	342233	747486	15052000	746728	580933	385656	323890	478808	466503	344674	451250	9083500	620123	330431	6496500	448316
A0A0A6YWI9	A0A0A6YWI9	Immunoglobulin heavy variable V1-11	Ighv1-11	tr|A0A0A6YWI9|A0A0A6YWI9_MOUSE Immunoglobulin heavy variable V1-11 (Fragment) OS=Mus musculus OX=10090 GN=Ighv1-11 PE=4 SV=1	1	17303000	22349000	396905	10432000	346898	13122000	560352	319865	12803000	38674000	13498000	18572000	400566	16660000	409718	17968000	342233	747486	312879	746728	580933	385656	323890	478808	466503	344674	451250	415610	620123	330431	325998	448316
A0A0A6YWP6	A0A0A6YWP6;A0A0A6YX18;Q8BVE3	V-type proton ATPase subunit H	Atp6v1h	tr|A0A0A6YWP6|A0A0A6YWP6_MOUSE V-type proton ATPase subunit H OS=Mus musculus OX=10090 GN=Atp6v1h PE=1 SV=1;tr|A0A0A6YX18|A0A0A6YX18_MOUSE V-type proton ATPase subunit H OS=Mus musculus OX=10090 GN=Atp6v1h PE=1 SV=1;sp|Q8BVE3|VATH_MOUSE V-type proton ATPas	1	490483	430182	396905	356080	346898	499532	560352	319865	360188	350936	336680	361612	400566	376107	409718	389028	342233	14570000	312879	10906000	580933	385656	323890	478808	466503	344674	451250	415610	620123	330431	325998	448316
A0A0A6YWP9	A0A0A6YWP9;A0A0A6YXY0;Q9CQ79	Thioredoxin domain-containing protein 9	Txndc9	tr|A0A0A6YWP9|A0A0A6YWP9_MOUSE Thioredoxin domain-containing protein 9 (Fragment) OS=Mus musculus OX=10090 GN=Txndc9 PE=1 SV=1;tr|A0A0A6YXY0|A0A0A6YXY0_MOUSE Thioredoxin domain-containing protein 9 OS=Mus musculus OX=10090 GN=Txndc9 PE=1 SV=1;sp|Q9CQ79|TXN	2	490483	430182	396905	356080	10947000	11105000	560352	13356000	360188	350936	336680	361612	7743600	376107	11540000	10689000	7136700	747486	312879	746728	580933	385656	323890	10999000	466503	8731500	4832200	7179000	620123	330431	325998	448316
A0A0A6YX02	A0A0A6YX02;Q9CQ22	Ragulator complex protein LAMTOR1	Lamtor1	tr|A0A0A6YX02|A0A0A6YX02_MOUSE Late endosomal/lysosomal adaptor and MAPK and MTOR activator 1 OS=Mus musculus OX=10090 GN=Lamtor1 PE=1 SV=1;sp|Q9CQ22|LTOR1_MOUSE Ragulator complex protein LAMTOR1 OS=Mus musculus OX=10090 GN=Lamtor1 PE=1 SV=1	1	7223200	430182	9207600	356080	12240000	499532	11055000	10951000	11869000	9026800	8035200	12307000	9043100	8978300	7725100	8531300	9714600	10497000	5931800	10228000	4134600	385656	7345800	8473200	466503	344674	11298000	6153700	9685900	5257200	9559300	9826300
A0A0A6YXN4	A0A0A6YXN4;A0A075B5U4	Immunoglobulin heavy variable V1-18	Ighv1-18	tr|A0A0A6YXN4|A0A0A6YXN4_MOUSE Immunoglobulin heavy variable V1-18 (Fragment) OS=Mus musculus OX=10090 GN=Ighv1-18 PE=1 SV=1;tr|A0A075B5U4|A0A075B5U4_MOUSE Immunoglobulin heavy variable V1-18 OS=Mus musculus OX=10090 GN=Ighv1-18 PE=1 SV=1	2	17025000	430182	21025000	13589000	346898	9664100	560352	9639600	360188	350936	12734000	361612	400566	376107	11495000	389028	13748000	747486	312879	746728	580933	7001500	323890	478808	466503	5866400	9493700	13058000	620123	11195000	12975000	448316
A0A0A6YXQ0	A0A0A6YXQ0	Immunoglobulin heavy variable 8-8	Ighv8-8	tr|A0A0A6YXQ0|A0A0A6YXQ0_MOUSE Immunoglobulin heavy variable 8-8 (Fragment) OS=Mus musculus OX=10090 GN=Ighv8-8 PE=4 SV=1	1	490483	430182	396905	356080	346898	499532	560352	319865	360188	350936	336680	361612	400566	376107	409718	389028	342233	747486	312879	746728	580933	385656	323890	478808	466503	344674	451250	415610	620123	330431	325998	448316
A0A0A6YYE7	A0A0A6YYE7;A0A0B4J1I4;A0A0B4J1I3;A0A0A6YYE5;A0A075B5L8	Immunoglobulin kappa variable 4-57	Igkv4-57;Igkv4-72;Igkv4-74;Igkv4-78;Igkv4-79	tr|A0A0A6YYE7|A0A0A6YYE7_MOUSE Immunoglobulin kappa variable 4-57 (Fragment) OS=Mus musculus OX=10090 GN=Igkv4-57 PE=4 SV=2;tr|A0A0B4J1I4|A0A0B4J1I4_MOUSE Immunoglobulin kappa chain variable 4-72 (Fragment) OS=Mus musculus OX=10090 GN=Igkv4-72 PE=4 SV=1;tr	1	38547000	430182	30775000	41065000	346898	25296000	6651200	319865	360188	4861400	11534000	8355800	400566	376107	409718	389028	342233	2813600	5406900	746728	580933	385656	323890	478808	6553000	344674	451250	415610	620123	330431	12274000	448316
A0A0B4J1H6	A0A0B4J1H6;P01630	Immunoglobulinkappa chain V-II region 7S34.1	Igkv2-137	tr|A0A0B4J1H6|A0A0B4J1H6_MOUSE Immunoglobulin kappa chain variable 2-137 (Fragment) OS=Mus musculus OX=10090 GN=Igkv2-137 PE=4 SV=1;sp|P01630|KV2A6_MOUSE Ig kappa chain V-II region 7S34.1 OS=Mus musculus OX=10090 PE=1 SV=1	1	490483	430182	8057700	356080	346898	499532	53997000	14861000	360188	350936	336680	361612	400566	376107	409718	389028	7267000	747486	312879	746728	5850200	385656	323890	478808	466503	9383600	451250	415610	620123	330431	9724200	448316
A0A0B4J1H8	A0A0B4J1H8;A0A0B4J1H7	Immunoglobulin kappa variable 1-133	Igkv1-133;Igkv1-135	tr|A0A0B4J1H8|A0A0B4J1H8_MOUSE Immunoglobulin kappa variable 1-133 (Fragment) OS=Mus musculus OX=10090 GN=Igkv1-133 PE=4 SV=1;tr|A0A0B4J1H7|A0A0B4J1H7_MOUSE Immunoglobulin kappa variable 1-135 (Fragment) OS=Mus musculus OX=10090 GN=Igkv1-135 PE=4 SV=1	1	17604000	6981800	7160800	8251600	346898	25798000	560352	12465000	6882400	350936	5081300	5333300	7915800	4748700	6094400	7492100	14495000	747486	10020000	746728	580933	5306800	323890	4860100	15821000	4356600	10393000	6010500	5997000	330431	325998	448316
A0A0B4J1I6	A0A0B4J1I6	Immunoglobulin kappa variable 4-69	Igkv4-69	tr|A0A0B4J1I6|A0A0B4J1I6_MOUSE Immunoglobulin kappa variable 4-69 (Fragment) OS=Mus musculus OX=10090 GN=Igkv4-69 PE=4 SV=1	3	490483	430182	396905	196200000	346898	499532	560352	319865	5461600	350936	336680	361612	400566	376107	409718	389028	342233	747486	312879	746728	6942900	385656	323890	478808	466503	344674	451250	415610	620123	330431	325998	448316
A0A0B4J1I9	A0A0B4J1I9;P04945	Immunoglobulinkappa chain V-VI region NQ2-6.1	Igkv4-55	tr|A0A0B4J1I9|A0A0B4J1I9_MOUSE Immunoglobulin kappa variable 4-55 (Fragment) OS=Mus musculus OX=10090 GN=Igkv4-55 PE=1 SV=1;sp|P04945|KV6AB_MOUSE Ig kappa chain V-VI region NQ2-6.1 OS=Mus musculus OX=10090 PE=2 SV=1	2	23478000	430182	17671000	13739000	8111100	46021000	560352	319865	360188	9295200	10759000	361612	400566	376107	409718	13245000	13200000	747486	6718700	746728	580933	385656	323890	478808	15045000	18382000	5458000	10992000	620123	330431	9894800	448316
A0A0B4J1J5	A0A0B4J1J5;A0A0B4J1J4;A0A0B4J1P3	Immunoglobulin kappa variable 4-69	Ighv9-3;Ighv9-2	tr|A0A0B4J1J5|A0A0B4J1J5_MOUSE Immunoglobulin heavy variable V9-3 (Fragment) OS=Mus musculus OX=10090 GN=Ighv9-3 PE=1 SV=1;tr|A0A0B4J1J4|A0A0B4J1J4_MOUSE Immunoglobulin heavy variable V9-2 (Fragment) OS=Mus musculus OX=10090 GN=Ighv9-2 PE=4 SV=1	4	16226000	430182	5790700	1819800	346898	26311000	560352	319865	360188	6137400	336680	361612	400566	376107	110440000	389028	342233	747486	312879	746728	580933	385656	323890	478808	466503	344674	451250	415610	620123	330431	325998	448316
A0A0B4J1N0	A0A0B4J1N0;A0A0G2JFE9;A0A0B4J1M0;A0A0G2JGS9;A0A075B5Y5;A0A075B5Y2	Immunoglobulin heavy variable 1-76	Ighv1-76	tr|A0A0B4J1N0|A0A0B4J1N0_MOUSE Immunoglobulin heavy variable 1-76 OS=Mus musculus OX=10090 GN=Ighv1-76 PE=1 SV=1;tr|A0A0G2JFE9|A0A0G2JFE9_MOUSE Immunoglobulin heavy variable 1-76 (Fragment) OS=Mus musculus OX=10090 GN=Ighv1-76 PE=1 SV=1	4	34951000	6968900	9563200	20292000	346898	499532	560352	319865	360188	22408000	4560900	6488500	400566	376107	409718	389028	342233	8487100	312879	746728	580933	385656	323890	478808	466503	344674	451250	415610	620123	330431	325998	448316
A0A0F6AIX6	A0A0F6AIX6;A0A1W2P7C8;A0A0F6AIX5;A0A1W2P6L7;A0A1W2P7T7;Q8BVA5-2;Q8BVA5;A0A1W2P6J8;A0A1W2P820	UPF0554 protein C2orf43 homolog		tr|A0A0F6AIX6|A0A0F6AIX6_MOUSE Lipid droplet-associated hydrolase OS=Mus musculus OX=10090 GN=Ldah PE=1 SV=1;tr|A0A1W2P7C8|A0A1W2P7C8_MOUSE Lipid droplet-associated hydrolase OS=Mus musculus OX=10090 GN=Ldah PE=1 SV=1;tr|A0A0F6AIX5|A0A0F6AIX5_MOUSE Lipid d	3	490483	430182	396905	356080	346898	499532	560352	319865	360188	350936	336680	361612	400566	376107	409718	389028	342233	12516000	312879	13331000	580933	385656	323890	478808	466503	344674	451250	415610	14889000	330431	325998	448316
A0A0G2JDH8	A0A0G2JDH8;D3YXZ7;Q8R1T4	UDP-N-acetylglucosamine transporter	Slc35a3	tr|A0A0G2JDH8|A0A0G2JDH8_MOUSE UDP-N-acetylglucosamine transporter (Fragment) OS=Mus musculus OX=10090 GN=Slc35a3 PE=1 SV=1;tr|D3YXZ7|D3YXZ7_MOUSE UDP-N-acetylglucosamine transporter (Fragment) OS=Mus musculus OX=10090 GN=Slc35a3 PE=1 SV=1;sp|Q8R1T4|S35A3_	2	490483	430182	396905	356080	346898	499532	10080000	319865	360188	350936	5531100	361612	400566	376107	409718	389028	342233	52048000	312879	23927000	580933	385656	7331100	478808	466503	344674	451250	415610	17416000	330431	325998	448316
A0A0G2JE69	A0A0G2JE69;Q8BG20;V9GXP1;Q9CWQ0	Diphthine synthase	Dph5	tr|A0A0G2JE69|A0A0G2JE69_MOUSE Diphthine methyl ester synthase (Fragment) OS=Mus musculus OX=10090 GN=Dph5 PE=1 SV=1;tr|Q8BG20|Q8BG20_MOUSE Diphthine methyl ester synthase OS=Mus musculus OX=10090 GN=Dph5 PE=1 SV=1;tr|V9GXP1|V9GXP1_MOUSE Diphthine methyl e	1	490483	430182	396905	356080	346898	499532	560352	319865	360188	3844500	336680	361612	400566	376107	409718	389028	3631200	747486	312879	746728	580933	385656	3781500	4795200	466503	344674	451250	415610	620123	330431	325998	448316
A0A0G2JFP4	A0A0G2JFP4;Q8K385	Ferric-chelate reductase 1	FRRS1	tr|A0A0G2JFP4|A0A0G2JFP4_MOUSE Ferric-chelate reductase 1 OS=Mus musculus OX=10090 GN=Frrs1 PE=1 SV=1;sp|Q8K385|FRRS1_MOUSE Ferric-chelate reductase 1 OS=Mus musculus OX=10090 GN=FRRS1 PE=1 SV=1	2	11014000	11518000	14256000	356080	26513000	24910000	560352	17540000	19121000	350936	19192000	14239000	26310000	21333000	25645000	20936000	342233	747486	13730000	15928000	29196000	21101000	16239000	27477000	24641000	23102000	24613000	33264000	620123	20531000	29003000	27394000
A0A0G2JFT8	A0A0G2JFT8;Q9D394-2;Q9D394;Q9D394-3;Q9D394-4	Protein RUFY3	Rufy3	tr|A0A0G2JFT8|A0A0G2JFT8_MOUSE Protein RUFY3 OS=Mus musculus OX=10090 GN=Rufy3 PE=1 SV=1;sp|Q9D394-2|RUFY3_MOUSE Isoform 2 of Protein RUFY3 OS=Mus musculus OX=10090 GN=Rufy3	3	9804900	9114900	8830400	356080	9670100	499532	7760100	319865	12033000	7782500	336680	10728000	400566	10755000	9922100	10637000	342233	747486	312879	746728	580933	10144000	9744500	8734200	466503	10203000	451250	9806800	6269000	6963100	325998	448316
A0A0G2JFV1	A0A0G2JFV1;A0A0G2JGU2;A0A0G2JEF0;D3YU42;Q9CQ04	2-oxoglutarate and iron-dependent oxygenase domain-containing protein 2	Ogfod2	tr|A0A0G2JFV1|A0A0G2JFV1_MOUSE 2-oxoglutarate and iron-dependent oxygenase domain-containing protein 2 (Fragment) OS=Mus musculus OX=10090 GN=Ogfod2 PE=4 SV=1;tr|A0A0G2JGU2|A0A0G2JGU2_MOUSE 2-oxoglutarate and iron-dependent oxygenase domain-containing prot	1	490483	559920	396905	356080	567900	499532	560352	319865	511830	350936	336680	361612	400566	481910	409718	389028	342233	747486	312879	1091300	580933	385656	576970	478808	466503	812930	595530	415610	620123	330431	1172800	570320
A0A0G2JFV4	A0A0G2JFV4;Q9D0C1	E3 ubiquitin-protein ligase RNF115	Rnf115	tr|A0A0G2JFV4|A0A0G2JFV4_MOUSE RING-type E3 ubiquitin transferase OS=Mus musculus OX=10090 GN=Rnf115 PE=1 SV=1;sp|Q9D0C1|RN115_MOUSE E3 ubiquitin-protein ligase RNF115 OS=Mus musculus OX=10090 GN=Rnf115 PE=1 SV=1	1	490483	430182	396905	356080	346898	499532	560352	319865	360188	350936	336680	361612	400566	376107	409718	389028	342233	747486	312879	746728	580933	385656	323890	478808	466503	344674	451250	415610	620123	330431	325998	448316
A0A0G2JGQ4	A0A0G2JGQ4;P54729	NEDD8 ultimate buster 1	Nub1	tr|A0A0G2JGQ4|A0A0G2JGQ4_MOUSE NEDD8 ultimate buster 1 OS=Mus musculus OX=10090 GN=Nub1 PE=1 SV=1;sp|P54729|NUB1_MOUSE NEDD8 ultimate buster 1 OS=Mus musculus OX=10090 GN=Nub1 PE=1 SV=2	2	4897100	4070900	396905	356080	2509500	499532	3275400	319865	360188	1423500	4067500	361612	3143400	376107	1213400	3411700	342233	13810000	312879	11635000	580933	1697700	1211200	478808	1819500	344674	451250	415610	4048700	1168800	325998	448316
A0A0G2JH03	A0A0G2JH03;Q9EPR2	Group XIIA secretory phospholipase A2	Pla2g12a	tr|A0A0G2JH03|A0A0G2JH03_MOUSE Group XIIA secretory phospholipase A2 (Fragment) OS=Mus musculus OX=10090 GN=Pla2g12a PE=1 SV=1;sp|Q9EPR2|PG12A_MOUSE Group XIIA secretory phospholipase A2 OS=Mus musculus OX=10090 GN=Pla2g12a PE=1 SV=2	1	490483	430182	396905	356080	346898	499532	560352	319865	360188	350936	3053700	2989100	400566	376107	409718	3535000	342233	747486	312879	746728	580933	385656	323890	478808	466503	344674	451250	415610	620123	330431	325998	448316
A0A0H2UH27	A0A0H2UH27;A0A0G2JEP0;Q61584-2;Q61584-5;Q61584-6;Q61584-4;Q61584-7;Q61584-3;Q61584;Q6P5B5	Fragile X mental retardation syndrome-related protein 1	Fxr1;Fxr2	tr|A0A0H2UH27|A0A0H2UH27_MOUSE Fragile X mental retardation syndrome-related protein 1 OS=Mus musculus OX=10090 GN=Fxr1 PE=1 SV=1;tr|A0A0G2JEP0|A0A0G2JEP0_MOUSE Fragile X mental retardation syndrome-related protein 1 OS=Mus musculus OX=10090 GN=Fxr1 PE=1 S	2	490483	1177400	1189500	1059500	831080	499532	1638300	319865	1347500	1162300	1076800	1862200	1025500	1422000	1285700	1474400	342233	3629500	1567300	2807300	580933	1302900	1476600	913590	1934700	344674	2078700	855740	3391900	330431	1876100	1299300
A0A0J9YTS4	A0A0J9YTS4;D3YXN7;Q8BJU2	Tetraspanin;Tetraspanin-9	Tspan9	tr|A0A0J9YTS4|A0A0J9YTS4_MOUSE Tetraspanin (Fragment) OS=Mus musculus OX=10090 GN=Tspan9 PE=1 SV=1;tr|D3YXN7|D3YXN7_MOUSE Tetraspanin (Fragment) OS=Mus musculus OX=10090 GN=Tspan9 PE=1 SV=2;sp|Q8BJU2|TSN9_MOUSE Tetraspanin-9 OS=Mus musculus OX=10090 GN=Tsp	1	19656000	430182	12151000	15408000	12584000	14934000	12692000	13156000	360188	11308000	12821000	13371000	15126000	8394300	13398000	18288000	342233	10496000	10820000	8757900	13653000	9982600	323890	11477000	10616000	14942000	451250	12299000	11366000	12749000	325998	7746700
A0A0J9YTW3	A0A0J9YTW3;A0A0J9YUM4;A0A0J9YU62;O88712-3;O88712-2;O88712	C-terminal-binding protein 1	Ctbp1	tr|A0A0J9YTW3|A0A0J9YTW3_MOUSE C-terminal-binding protein 1 (Fragment) OS=Mus musculus OX=10090 GN=Ctbp1 PE=1 SV=1;tr|A0A0J9YUM4|A0A0J9YUM4_MOUSE C-terminal-binding protein 1 OS=Mus musculus OX=10090 GN=Ctbp1 PE=1 SV=1;tr|A0A0J9YU62|A0A0J9YU62_MOUSE C-term	1	2927200	4082700	2860100	3494300	346898	2674500	560352	319865	2568000	2625400	2487100	5057800	1885900	376107	3139200	3436000	342233	2648600	2487900	2867200	580933	385656	323890	478808	466503	2674800	4071300	415610	2682600	3384200	325998	2142400
A0A0J9YVB9	A0A0J9YVB9;Q3TG90;D3YYK8;D3Z6G3;E9Q6X0;Q6PER3;Q8R001-2;Q8R001	Microtubule-associated protein RP/EB family member 3;Microtubule-associated protein RP/EB family member 2	Mapre2;Mapre3	tr|A0A0J9YVB9|A0A0J9YVB9_MOUSE Microtubule-associated protein RP/EB family member 3 (Fragment) OS=Mus musculus OX=10090 GN=Mapre3 PE=1 SV=3;tr|Q3TG90|Q3TG90_MOUSE Microtubule-associated protein RP/EB family member 2 OS=Mus musculus OX=10090 GN=Mapre2 PE=1	1	1872000	430182	396905	356080	902330	499532	1277300	319865	360188	350936	336680	361612	1168000	1025700	1162000	389028	1127900	2863100	1213400	3976700	580933	385656	323890	478808	1453800	1193500	451250	908060	2220200	330431	325998	448316
A0A0M3HEP8	A0A0M3HEP8;Q6TEK5	Vitamin K epoxide reductase complex subunit 1-like protein 1	Vkorc1l1	tr|A0A0M3HEP8|A0A0M3HEP8_MOUSE Vitamin-K-epoxide reductase (warfarin-sensitive) OS=Mus musculus OX=10090 GN=Vkorc1l1 PE=1 SV=1;sp|Q6TEK5|VKORL_MOUSE Vitamin K epoxide reductase complex subunit 1-like protein 1 OS=Mus musculus OX=10090 GN=Vkorc1l1 PE=1 SV=1	1	490483	430182	396905	1833100	346898	499532	6310000	319865	360188	350936	336680	361612	400566	1507300	409718	389028	342233	21711000	312879	17657000	580933	385656	3607000	478808	5414200	344674	451250	415610	17174000	3881100	2875400	448316
A0A0N4SUJ0	A0A0N4SUJ0;Q6PGL7;A0A0N4SV74;Q6PGL7-2	WASH complex subunit FAM21	Fam21	tr|A0A0N4SUJ0|A0A0N4SUJ0_MOUSE WASH complex subunit 2 (Fragment) OS=Mus musculus OX=10090 GN=Washc2 PE=1 SV=1;sp|Q6PGL7|WASC2_MOUSE WASH complex subunit 2 OS=Mus musculus OX=10090 GN=Washc2 PE=1 SV=1;tr|A0A0N4SV74|A0A0N4SV74_MOUSE WASH complex subunit 2 (F	3	3787600	3242300	3923100	4955100	3043800	2735500	560352	3341400	2447500	2358000	3227800	3344200	3206900	3049700	3643900	3691500	3773400	2676000	3425000	3384200	580933	3865500	3623600	3833400	4263400	4862100	4106300	3669800	3412700	3080500	3895000	3394400
A0A0N4SUM3	A0A0N4SUM3;Q91V01	Lysophospholipid acyltransferase 5	Lpcat3	tr|A0A0N4SUM3|A0A0N4SUM3_MOUSE Lysophospholipid acyltransferase 5 OS=Mus musculus OX=10090 GN=Lpcat3 PE=1 SV=1;sp|Q91V01|MBOA5_MOUSE Lysophospholipid acyltransferase 5 OS=Mus musculus OX=10090 GN=Lpcat3 PE=1 SV=1	2	490483	430182	396905	356080	346898	499532	560352	319865	360188	350936	336680	361612	400566	376107	409718	389028	342233	12110000	312879	9854900	580933	385656	323890	478808	466503	344674	451250	415610	620123	330431	325998	448316
A0A0N4SV05	A0A0N4SV05;A0A0N4SVH3;A0A0R4J0U2;Q0VGB7	Serine/threonine-protein phosphatase 4 regulatory subunit 2	Ppp4r2	tr|A0A0N4SV05|A0A0N4SV05_MOUSE Serine/threonine-protein phosphatase 4 regulatory subunit 2 (Fragment) OS=Mus musculus OX=10090 GN=Ppp4r2 PE=1 SV=1;tr|A0A0N4SVH3|A0A0N4SVH3_MOUSE Serine/threonine-protein phosphatase 4 regulatory subunit 2 (Fragment) OS=Mus	1	490483	1777100	396905	356080	346898	499532	560352	319865	360188	350936	336680	361612	853200	376107	409718	1612500	342233	747486	312879	746728	716740	385656	323890	478808	881250	1066200	451250	415610	620123	330431	325998	448316
A0A0N4SVK3	A0A0N4SVK3;P62322	U6 snRNA-associated Sm-like protein LSm5	Lsm5	tr|A0A0N4SVK3|A0A0N4SVK3_MOUSE U6 snRNA-associated Sm-like protein LSm5 OS=Mus musculus OX=10090 GN=Lsm5 PE=1 SV=1;sp|P62322|LSM5_MOUSE U6 snRNA-associated Sm-like protein LSm5 OS=Mus musculus OX=10090 GN=Lsm5 PE=3 SV=2	1	35075000	32783000	28576000	29009000	26839000	49531000	22539000	35786000	28971000	29594000	33233000	36746000	35786000	32763000	30148000	48289000	31998000	12073000	26143000	14322000	46372000	23963000	29661000	34950000	24704000	37881000	36566000	28166000	15129000	27855000	24976000	25335000
A0A0N4SVT3	A0A0N4SVT3;A0A0N4SW28;Q9DAS9	Guanine nucleotide-binding protein G(I)/G(S)/G(O) subunit gamma-12	Gng12	tr|A0A0N4SVT3|A0A0N4SVT3_MOUSE Guanine nucleotide-binding protein subunit gamma (Fragment) OS=Mus musculus OX=10090 GN=Gng12 PE=1 SV=1;tr|A0A0N4SW28|A0A0N4SW28_MOUSE Guanine nucleotide-binding protein subunit gamma OS=Mus musculus OX=10090 GN=Gng12 PE=1 SV	2	79000000	53852000	54896000	61273000	346898	65167000	62272000	69101000	55288000	68964000	53930000	66250000	66744000	61923000	61955000	389028	33451000	55236000	68889000	41074000	580933	60860000	66305000	48136000	59091000	56785000	59620000	64226000	63292000	65452000	325998	67366000
A0A0R4IZW5	A0A0R4IZW5;P09803	Cadherin-1;E-Cad/CTF1;E-Cad/CTF2;E-Cad/CTF3	Cdh1	tr|A0A0R4IZW5|A0A0R4IZW5_MOUSE Cadherin-1 OS=Mus musculus OX=10090 GN=Cdh1 PE=1 SV=1;sp|P09803|CADH1_MOUSE Cadherin-1 OS=Mus musculus OX=10090 GN=Cdh1 PE=1 SV=1	4	490483	430182	396905	356080	5150300	9925900	560352	6111300	4328700	350936	4316100	361612	7152200	5619300	5227000	12720000	342233	2824300	312879	746728	580933	5510500	10565000	10639000	7589400	13396000	7317700	5008300	620123	9169000	7076400	7343800
A0A0R4IZW9	A0A0R4IZW9;Q9DCT5	Stromal cell-derived factor 2	Sdf2	tr|A0A0R4IZW9|A0A0R4IZW9_MOUSE Stromal cell-derived factor 2 OS=Mus musculus OX=10090 GN=Sdf2 PE=1 SV=1;sp|Q9DCT5|SDF2_MOUSE Stromal cell-derived factor 2 OS=Mus musculus OX=10090 GN=Sdf2 PE=1 SV=1	1	490483	430182	396905	356080	346898	499532	560352	319865	360188	350936	336680	361612	400566	376107	409718	389028	342233	747486	312879	746728	580933	385656	323890	478808	466503	344674	451250	415610	620123	330431	325998	448316
A0A0R4J015	A0A0R4J015;J3QML2;B2RX12-3;B2RX12-2;B2RX12	Canalicular multispecific organic anion transporter 2	Abcc3	tr|A0A0R4J015|A0A0R4J015_MOUSE Canalicular multispecific organic anion transporter 2 OS=Mus musculus OX=10090 GN=Abcc3 PE=1 SV=1;tr|J3QML2|J3QML2_MOUSE Canalicular multispecific organic anion transporter 2 OS=Mus musculus OX=10090 GN=Abcc3 PE=1 SV=1;sp|B2R	11	490483	430182	396905	16481000	14196000	499532	2939200	18143000	360188	22348000	336680	12874000	19980000	376107	409718	10005000	342233	24269000	15494000	59612000	580933	385656	13364000	478808	466503	13137000	21550000	415610	17476000	330431	325998	448316
A0A0R4J052	A0A0R4J052;Q99KB8-2;E9Q2H8;D3YWI0;D3YUX8	Hydroxyacylglutathione hydrolase, mitochondrial	Hagh	tr|A0A0R4J052|A0A0R4J052_MOUSE Hydroxyacylglutathione hydrolase, mitochondrial OS=Mus musculus OX=10090 GN=Hagh PE=1 SV=1;sp|Q99KB8-2|GLO2_MOUSE Isoform 2 of Hydroxyacylglutathione hydrolase, mitochondrial OS=Mus musculus OX=10090 GN=Hagh;tr|E9Q2H8|E9Q2H8_	1	4019200	5756000	4256700	7867700	5453900	5003300	4290300	8228200	4604700	3420300	6800500	6400800	4185200	5056400	7082200	8567300	6503400	747486	7078100	746728	580933	6455600	4670400	3728600	6183400	7249400	10618000	7879900	3808600	7220300	8709000	3551600
A0A0R4J065	A0A0R4J065	Cysteine protease		tr|A0A0R4J065|A0A0R4J065_MOUSE Cysteine protease OS=Mus musculus OX=10090 GN=Atg4b PE=1 SV=1	1	490483	430182	396905	356080	346898	499532	560352	319865	360188	350936	336680	361612	400566	376107	409718	389028	342233	747486	312879	746728	580933	385656	323890	478808	466503	344674	451250	415610	620123	330431	325998	448316
A0A0R4J069	A0A0R4J069;Q9JLI6-2;F6ZFP8;F7D651;D3Z7G6;F7BB44;M0QWF1;D3Z3I6	Selenocysteine lyase	Scly	tr|A0A0R4J069|A0A0R4J069_MOUSE Selenocysteine lyase OS=Mus musculus OX=10090 GN=Scly PE=1 SV=1;sp|Q9JLI6-2|SCLY_MOUSE Isoform 2 of Selenocysteine lyase OS=Mus musculus OX=10090 GN=Scly;tr|F6ZFP8|F6ZFP8_MOUSE Selenocysteine lyase (Fragment) OS=Mus musculus	1	9878800	16246000	11655000	12144000	12549000	8022400	13521000	12204000	10623000	13578000	10795000	16957000	10726000	12626000	11626000	14226000	11464000	8388900	12248000	8687700	580933	8535300	12839000	7903600	12926000	344674	16545000	9051900	9918300	14659000	14871000	10081000
A0A0R4J079	A0A0R4J079;Q8BMP6	Golgi resident protein GCP60	Acbd3	tr|A0A0R4J079|A0A0R4J079_MOUSE Golgi resident protein GCP60 OS=Mus musculus OX=10090 GN=Acbd3 PE=1 SV=1;sp|Q8BMP6|GCP60_MOUSE Golgi resident protein GCP60 OS=Mus musculus OX=10090 GN=Acbd3 PE=1 SV=3	4	4586700	3579400	4753100	3652600	5347100	3606700	4408200	2378600	3202800	3703500	336680	3012500	3707100	3108800	3236300	3189700	342233	2818100	4705100	4696200	580933	4607100	3063900	3406100	6049500	3481700	451250	4332200	3445900	3739200	325998	4377300
A0A0R4J0D3	A0A0R4J0D3;Q3TDQ1	Dolichyl-diphosphooligosaccharide--protein glycosyltransferase subunit STT3B	Stt3b	tr|A0A0R4J0D3|A0A0R4J0D3_MOUSE Dolichyl-diphosphooligosaccharide--protein glycotransferase OS=Mus musculus OX=10090 GN=Stt3b PE=1 SV=1;sp|Q3TDQ1|STT3B_MOUSE Dolichyl-diphosphooligosaccharide--protein glycosyltransferase subunit STT3B OS=Mus musculus OX=100	3	490483	430182	396905	356080	346898	499532	560352	319865	360188	350936	336680	361612	400566	376107	409718	389028	342233	20585000	312879	14425000	580933	385656	323890	478808	466503	344674	451250	415610	12829000	330431	325998	448316
A0A0R4J0M4	A0A0R4J0M4;Q91V80	Apolipoprotein F	Apof	tr|A0A0R4J0M4|A0A0R4J0M4_MOUSE Apolipoprotein F OS=Mus musculus OX=10090 GN=Apof PE=1 SV=1;sp|Q91V80|APOF_MOUSE Apolipoprotein F OS=Mus musculus OX=10090 GN=Apof PE=2 SV=2	1	1302800	2298400	2663200	2169600	1910800	1951800	1344000	2957400	2065700	2679300	2717800	2509900	2170100	2288300	3214100	2770100	1983900	1784700	2305900	746728	580933	2387400	3238100	2318800	2681300	1939200	2596400	2605300	2194800	2097700	2028000	1704600
A0A0R4J0M9	A0A0R4J0M9;Q8CDG3;Q8CDG3-2	Deubiquitinating protein VCIP135	Vcpip1	tr|A0A0R4J0M9|A0A0R4J0M9_MOUSE Ubiquitinyl hydrolase 1 OS=Mus musculus OX=10090 GN=Vcpip1 PE=1 SV=1;sp|Q8CDG3|VCIP1_MOUSE Deubiquitinating protein VCIP135 OS=Mus musculus OX=10090 GN=Vcpip1 PE=1 SV=1	3	674790	563700	664670	355970	555110	499532	681540	319865	563180	350936	336680	361612	400566	676170	499580	400100	378210	617000	312879	485370	580933	527750	662390	478808	705060	354450	543650	875080	1200000	330431	401210	597280
A0A0R4J0N7	A0A0R4J0N7;O88962	7-alpha-hydroxycholest-4-en-3-one 12-alpha-hydroxylase	Cyp8b1	tr|A0A0R4J0N7|A0A0R4J0N7_MOUSE 7-alpha-hydroxycholest-4-en-3-one 12-alpha-hydroxylase OS=Mus musculus OX=10090 GN=Cyp8b1 PE=1 SV=1;sp|O88962|CP8B1_MOUSE 7-alpha-hydroxycholest-4-en-3-one 12-alpha-hydroxylase OS=Mus musculus OX=10090 GN=Cyp8b1 PE=1 SV=1	12	490483	430182	396905	356080	346898	499532	560352	319865	360188	350936	336680	361612	400566	376107	409718	389028	342233	29107000	312879	34648000	580933	725270	323890	478808	1656300	344674	451250	415610	52584000	330431	325998	448316
A0A0R4J0N9	A0A0R4J0N9;A0A0R4J147;A0A0R4J1L9;Q5HZI1-3;Q5HZI1-2;Q5HZI1-4;Q5HZI1;D3Z2H5;D3Z7B3	Microtubule-associated tumor suppressor 1 homolog	Mtus1	tr|A0A0R4J0N9|A0A0R4J0N9_MOUSE Microtubule-associated tumor suppressor 1 homolog OS=Mus musculus OX=10090 GN=Mtus1 PE=1 SV=1;tr|A0A0R4J147|A0A0R4J147_MOUSE Microtubule-associated tumor suppressor 1 homolog OS=Mus musculus OX=10090 GN=Mtus1 PE=1 SV=1;tr|A0A	2	490483	10743000	396905	356080	346898	4426700	560352	4767500	360188	350936	336680	3795200	400566	376107	409718	389028	9712000	10013000	6588200	7300900	580933	7388100	323890	478808	466503	344674	451250	415610	8964500	330431	325998	448316
A0A0R4J0P7	A0A0R4J0P7;Q78KK3	Solute carrier family 22 member 18	Slc22a18	tr|A0A0R4J0P7|A0A0R4J0P7_MOUSE Solute carrier family 22 member 18 OS=Mus musculus OX=10090 GN=Slc22a18 PE=1 SV=1;sp|Q78KK3|S22AI_MOUSE Solute carrier family 22 member 18 OS=Mus musculus OX=10090 GN=Slc22a18 PE=1 SV=2	2	490483	430182	396905	2654400	346898	499532	6209300	319865	360188	350936	336680	361612	400566	376107	409718	389028	342233	17949000	312879	20874000	580933	385656	323890	478808	466503	344674	451250	415610	15780000	330431	325998	448316
A0A0R4J0T5	A0A0R4J0T5;P28659-2;P28659-3;P28659;P28659-4	CUGBP Elav-like family member 1	Celf1	tr|A0A0R4J0T5|A0A0R4J0T5_MOUSE CUGBP Elav-like family member 1 OS=Mus musculus OX=10090 GN=Celf1 PE=1 SV=1;sp|P28659-2|CELF1_MOUSE Isoform 2 of CUGBP Elav-like family member 1 OS=Mus musculus OX=10090 GN=Celf1;sp|P28659-3|CELF1_MOUSE Isoform 3 of CUGBP Ela	2	490483	430182	396905	356080	346898	499532	560352	319865	360188	350936	336680	361612	400566	376107	409718	389028	342233	813480	312879	1092000	580933	385656	323890	478808	466503	344674	451250	415610	620123	330431	325998	448316
A0A0R4J0U3	A0A0R4J0U3;O54943	Period circadian protein homolog 2	Per2	tr|A0A0R4J0U3|A0A0R4J0U3_MOUSE Period circadian protein homolog 2 OS=Mus musculus OX=10090 GN=Per2 PE=1 SV=1;sp|O54943|PER2_MOUSE Period circadian protein homolog 2 OS=Mus musculus OX=10090 GN=Per2 PE=1 SV=3	1	17017000	11526000	12374000	356080	12393000	19606000	560352	319865	18263000	350936	21411000	12743000	400566	15385000	7218400	19730000	9555500	747486	312879	746728	580933	13734000	323890	478808	12389000	14507000	14900000	17795000	620123	7904000	325998	13904000
A0A0R4J119	A0A0R4J119;Q7TMB8-2;Q7TMB8;A0A0U1RQ05;Q5SQX6;F6QD74;G3UZI5	Cytoplasmic FMR1-interacting protein 1;Cytoplasmic FMR1-interacting protein 2	Cyfip1;Cyfip2	tr|A0A0R4J119|A0A0R4J119_MOUSE Cytoplasmic FMR1-interacting protein OS=Mus musculus OX=10090 GN=Cyfip1 PE=1 SV=1;sp|Q7TMB8-2|CYFP1_MOUSE Isoform 2 of Cytoplasmic FMR1-interacting protein 1 OS=Mus musculus OX=10090 GN=Cyfip1;sp|Q7TMB8|CYFP1_MOUSE Cytoplasmi	7	490483	430182	396905	356080	346898	499532	560352	319865	360188	350936	336680	361612	400566	376107	409718	389028	342233	7552000	312879	7699300	580933	385656	323890	478808	466503	344674	451250	415610	8486200	330431	325998	448316
A0A0R4J135	A0A0R4J135;G3UYY2;G3UWK0;G3UZT2;G3UWX5	Methanethiol oxidase	Selenbp2	tr|A0A0R4J135|A0A0R4J135_MOUSE Selenium-binding protein 2 OS=Mus musculus OX=10090 GN=Selenbp2 PE=1 SV=1;tr|G3UYY2|G3UYY2_MOUSE Selenium-binding protein 2 OS=Mus musculus OX=10090 GN=Selenbp2 PE=1 SV=1	1	5547300	1207600	2282100	1829800	9305200	17788000	2973900	13103000	2188700	1830800	3085500	3264400	7400800	3259800	15586000	272900000	3550000	1901600	2167500	1519900	1152500000	6843400	2567000000	1185000000	3712700000	2251500000	762630000	3882200000	550240000	300650000	390970000	439350000
A0A0R4J136	A0A0R4J136;Q68FF9	3-oxo-5-alpha-steroid 4-dehydrogenase 1	Srd5a1	tr|A0A0R4J136|A0A0R4J136_MOUSE 3-oxo-5-alpha-steroid 4-dehydrogenase OS=Mus musculus OX=10090 GN=Srd5a1 PE=3 SV=1;sp|Q68FF9|S5A1_MOUSE 3-oxo-5-alpha-steroid 4-dehydrogenase 1 OS=Mus musculus OX=10090 GN=Srd5a1 PE=2 SV=2	3	490483	430182	396905	356080	346898	499532	560352	319865	360188	350936	336680	361612	400566	376107	409718	389028	342233	10823000	312879	10530000	580933	385656	323890	478808	466503	344674	451250	415610	12848000	330431	325998	448316
A0A0R4J174	A0A0R4J174;Q9QZH6	Evolutionarily conserved signaling intermediate in Toll pathway, mitochondrial	Ecsit	tr|A0A0R4J174|A0A0R4J174_MOUSE Evolutionarily conserved signaling intermediate in Toll pathway, mitochondrial OS=Mus musculus OX=10090 GN=Ecsit PE=1 SV=1;sp|Q9QZH6|ECSIT_MOUSE Evolutionarily conserved signaling intermediate in Toll pathway, mitochondrial O	2	490483	430182	396905	356080	346898	499532	560352	319865	1819700	1449200	336680	361612	400566	376107	1468800	1103800	342233	747486	312879	2034300	580933	385656	1699000	478808	1880700	344674	2200000	415610	1758400	330431	325998	448316
A0A0R4J187	A0A0R4J187;P23475;E9PZD4;A0A2R8VHZ9	X-ray repair cross-complementing protein 6	Xrcc6	tr|A0A0R4J187|A0A0R4J187_MOUSE ATP-dependent DNA helicase 2 subunit 1 OS=Mus musculus OX=10090 GN=Xrcc6 PE=1 SV=1;sp|P23475|XRCC6_MOUSE X-ray repair cross-complementing protein 6 OS=Mus musculus OX=10090 GN=Xrcc6 PE=1 SV=5;tr|E9PZD4|E9PZD4_MOUSE X-ray repa	2	490483	3392300	396905	2466400	346898	499532	560352	319865	2172000	3445300	336680	2962600	400566	4059500	409718	389028	342233	3297500	312879	2902100	580933	3031000	323890	478808	466503	2551000	2755700	415610	3500200	330431	325998	2626300
A0A0R4J1H0	A0A0R4J1H0;Q3KNM2	E3 ubiquitin-protein ligase MARCH5	March5	tr|A0A0R4J1H0|A0A0R4J1H0_MOUSE E3 ubiquitin-protein ligase MARCHF5 OS=Mus musculus OX=10090 GN=Marchf5 PE=1 SV=1;sp|Q3KNM2|MARH5_MOUSE E3 ubiquitin-protein ligase MARCHF5 OS=Mus musculus OX=10090 GN=Marchf5 PE=1 SV=1	2	4862100	4670600	396905	356080	346898	4230200	5091400	319865	360188	350936	336680	3524900	400566	376107	409718	389028	4635900	9348300	312879	6215400	580933	385656	323890	5146900	466503	3393000	451250	3841600	8552400	5362200	325998	3914100
A0A0R4J1L2	A0A0R4J1L2;Q91VK2;F6ZFU0;P57776-2;D3YY68;D3Z7N2;D3YZT9	Elongation factor 1-delta	Eef1d	tr|A0A0R4J1L2|A0A0R4J1L2_MOUSE Elongation factor 1-delta OS=Mus musculus OX=10090 GN=Eef1d PE=1 SV=1;tr|Q91VK2|Q91VK2_MOUSE Eef1d protein OS=Mus musculus OX=10090 GN=Eef1d PE=1 SV=1;tr|F6ZFU0|F6ZFU0_MOUSE Elongation factor 1-delta (Fragment) OS=Mus musculu	1	490483	8440300	10802000	356080	16657000	11425000	12860000	10311000	13059000	8435400	7798000	10402000	12503000	11098000	12023000	9574400	15385000	8339100	9198900	13507000	7340500	13014000	16102000	13290000	12463000	11809000	18122000	16292000	10180000	14272000	15991000	11061000
A0A0R4J260	A0A0R4J260;B2RRE7	OTU domain-containing protein 4	Otud4	tr|A0A0R4J260|A0A0R4J260_MOUSE Ubiquitinyl hydrolase 1 OS=Mus musculus OX=10090 GN=Otud4 PE=1 SV=1;sp|B2RRE7|OTUD4_MOUSE OTU domain-containing protein 4 OS=Mus musculus OX=10090 GN=Otud4 PE=1 SV=1	2	2597500	3604300	396905	356080	3133000	3257400	560352	319865	360188	350936	336680	361612	400566	376107	409718	3429500	2093400	747486	1770600	2295500	580933	385656	2553400	2790100	4185800	3892500	2975900	3523200	2934600	2938200	325998	2133500
A0A0R4J272	A0A0R4J272;Q921N7	Transmembrane protein 70, mitochondrial	Tmem70	tr|A0A0R4J272|A0A0R4J272_MOUSE Transmembrane protein 70, mitochondrial OS=Mus musculus OX=10090 GN=Tmem70 PE=1 SV=1;sp|Q921N7|TMM70_MOUSE Transmembrane protein 70, mitochondrial OS=Mus musculus OX=10090 GN=Tmem70 PE=2 SV=2	1	490483	430182	396905	356080	346898	499532	560352	319865	360188	350936	336680	361612	400566	376107	409718	389028	755850	1190200	312879	1098300	580933	385656	851190	478808	466503	344674	451250	415610	586360	330431	325998	448316
A0A0U1RPI1	A0A0U1RPI1;Q9Z239	Phospholemman	Fxyd1	tr|A0A0U1RPI1|A0A0U1RPI1_MOUSE Phospholemman OS=Mus musculus OX=10090 GN=Fxyd1 PE=1 SV=1;sp|Q9Z239|PLM_MOUSE Phospholemman OS=Mus musculus OX=10090 GN=Fxyd1 PE=1 SV=1	1	42090000	36243000	34176000	37392000	33108000	46612000	32898000	33556000	39800000	40532000	43851000	39149000	38102000	38318000	41247000	44493000	33785000	23490000	31361000	25219000	27755000	49371000	29487000	42515000	29232000	32488000	32113000	38334000	17113000	32052000	27933000	47858000
A0A0U1RPJ7	A0A0U1RPJ7;D3YVR9;Q9R0P4	Small acidic protein	1110004F10Rik;Smap	tr|A0A0U1RPJ7|A0A0U1RPJ7_MOUSE RIKEN cDNA 1110004F10 gene (Fragment) OS=Mus musculus OX=10090 GN=1110004F10Rik PE=1 SV=1;tr|D3YVR9|D3YVR9_MOUSE RIKEN cDNA 1110004F10 gene OS=Mus musculus OX=10090 GN=1110004F10Rik PE=1 SV=1;sp|Q9R0P4|SMAP_MOUSE Small acidic	1	17067000	11486000	14416000	11923000	13059000	23848000	14925000	9418600	17604000	350936	18026000	12362000	13440000	18165000	11520000	14912000	12160000	6147500	312879	8248000	7316600	13779000	9151700	13683000	13158000	12363000	12399000	16347000	6747600	10073000	9885100	16796000
A0A0U1RPY6	A0A0U1RPY6;Q9JKW0	ADP-ribosylation factor-like protein 6-interacting protein 1	Arl6ip1	tr|A0A0U1RPY6|A0A0U1RPY6_MOUSE ADP-ribosylation factor-like protein 6-interacting protein 1 (Fragment) OS=Mus musculus OX=10090 GN=Arl6ip1 PE=1 SV=1;sp|Q9JKW0|AR6P1_MOUSE ADP-ribosylation factor-like protein 6-interacting protein 1 OS=Mus musculus OX=10090	1	6260800	5906000	5597000	5691200	346898	499532	5354600	3631600	4945500	5514100	5200100	4724100	4904500	4777200	4193000	4303900	6973100	10996000	5437500	15220000	5267000	7041500	7058800	5951300	7815800	4479200	7779700	5598500	10389000	8630100	7190700	6314000
A0A140LHI8	A0A140LHI8;Q8K419	Galectin-4	Lgals4	tr|A0A140LHI8|A0A140LHI8_MOUSE Galectin OS=Mus musculus OX=10090 GN=Lgals4 PE=1 SV=1;sp|Q8K419|LEG4_MOUSE Galectin-4 OS=Mus musculus OX=10090 GN=Lgals4 PE=1 SV=2	1	490483	430182	396905	356080	346898	6703400	560352	2092800	360188	350936	336680	361612	400566	376107	409718	389028	342233	747486	312879	746728	580933	385656	323890	478808	466503	344674	451250	415610	620123	330431	325998	448316
A0A140LIQ8	A0A140LIQ8;A0A140LJ56;Q9CQG6-2;Q9CQG6	Transmembrane protein 147	Tmem147	tr|A0A140LIQ8|A0A140LIQ8_MOUSE Transmembrane protein 147 OS=Mus musculus OX=10090 GN=Tmem147 PE=1 SV=1;tr|A0A140LJ56|A0A140LJ56_MOUSE Transmembrane protein 147 OS=Mus musculus OX=10090 GN=Tmem147 PE=1 SV=1;sp|Q9CQG6-2|TM147_MOUSE Isoform 2 of Transmembrane	1	490483	430182	396905	356080	346898	499532	560352	319865	360188	350936	336680	361612	400566	376107	409718	389028	342233	6764800	312879	4633800	580933	385656	323890	478808	466503	344674	451250	415610	4510200	330431	325998	448316
A0A140LJF9	A0A140LJF9	Aldehyde dehydrogenase family 3, subfamily A2	Aldh3a2	tr|A0A140LJF9|A0A140LJF9_MOUSE Aldehyde dehydrogenase family 3 member A2 (Fragment) OS=Mus musculus OX=10090 GN=Aldh3a2 PE=1 SV=1	1	7425000	16949000	14431000	11042000	13677000	5269500	9136600	7816800	11507000	13723000	9681800	9698100	8744100	8683600	409718	3634400	10494000	6860300	9349800	8082100	10737000	6779800	5712000	8453900	466503	344674	7618000	415610	6099500	330431	325998	8857900
A0A140T8I9	A0A140T8I9;E9Q3L2;A0A338P6S0;A0A338P7D3	1-phosphatidylinositol 4-kinase	Pi4ka	tr|A0A140T8I9|A0A140T8I9_MOUSE Phosphatidylinositol 4-kinase alpha OS=Mus musculus OX=10090 GN=Pi4ka PE=1 SV=1;sp|E9Q3L2|PI4KA_MOUSE Phosphatidylinositol 4-kinase alpha OS=Mus musculus OX=10090 GN=Pi4ka PE=1 SV=2	4	490483	430182	4210700	356080	4672700	499532	560352	319865	360188	350936	336680	361612	400566	2070900	409718	389028	342233	4974900	312879	4461300	580933	385656	323890	478808	466503	344674	2585900	3231000	3462300	330431	325998	448316
A0A140T8M2	A0A140T8M2;P01636	Immunoglobulinkappa chain V-V region MOPC 149		tr|A0A140T8M2|A0A140T8M2_MOUSE Immunoglobulin kappa variable 12-44 (Fragment) OS=Mus musculus OX=10090 GN=Igkv12-44 PE=4 SV=2;sp|P01636|KV5A4_MOUSE Ig kappa chain V-V region MOPC 149 OS=Mus musculus OX=10090 PE=1 SV=1	1	17734000	430182	5333700	10756000	7118900	11492000	560352	319865	360188	350936	4419900	6152500	400566	376107	409718	389028	342233	747486	5880300	746728	580933	385656	323890	478808	466503	6983000	451250	4655600	620123	330431	5022100	448316
A0A140T8M4	A0A140T8M4;A0A0G2JFN8	Immunoglobulin kappa variable 8-19	Igkv8-19	tr|A0A140T8M4|A0A140T8M4_MOUSE Immunoglobulin kappa variable 8-19 OS=Mus musculus OX=10090 GN=Igkv8-19 PE=1 SV=2;tr|A0A0G2JFN8|A0A0G2JFN8_MOUSE Immunoglobulin kappa variable 8-19 (Fragment) OS=Mus musculus OX=10090 GN=Igkv8-19 PE=1 SV=4	3	490483	28842000	32362000	52926000	23424000	499532	20524000	319865	360188	30053000	336680	14064000	400566	11401000	409718	389028	93627000	747486	312879	746728	580933	385656	323890	478808	466503	344674	22503000	415610	620123	330431	325998	448316
A0A140T8M5	A0A140T8M5;A0A075B5N7;A0A140T8P1;A0A0G2JGY3	Immunoglobulin kappa variable 6-15	Igkv6-13	tr|A0A140T8M5|A0A140T8M5_MOUSE Immunoglobulin kappa variable 6-15 (Fragment) OS=Mus musculus OX=10090 GN=Igkv6-15 PE=1 SV=2;tr|A0A075B5N7|A0A075B5N7_MOUSE Immunoglobulin kappa variable 6-13 OS=Mus musculus OX=10090 GN=Igkv6-13 PE=1 SV=7;tr|A0A140T8P1|A0A14	1	112000000	430182	396905	356080	346898	12626000	560352	319865	3377600	350936	336680	7905000	400566	376107	409718	389028	342233	747486	312879	746728	580933	385656	323890	478808	466503	344674	451250	10404000	620123	330431	325998	448316
A0A140T8P6	A0A140T8P6;P01635	Immunoglobulinkappa chain V-V region K2		tr|A0A140T8P6|A0A140T8P6_MOUSE Immunoglobulin kappa variable 12-46 (Fragment) OS=Mus musculus OX=10090 GN=Igkv12-46 PE=1 SV=2;sp|P01635|KV5A3_MOUSE Ig kappa chain V-V region K2 (Fragment) OS=Mus musculus OX=10090 PE=1 SV=1	2	16738000	4625400	3084900	7562500	17629000	24629000	560352	319865	360188	5291100	4836300	361612	6448300	376107	409718	4460900	4015700	747486	2628000	746728	580933	385656	323890	478808	466503	2924600	4163700	415610	620123	330431	325998	448316
A0A140T8P9	A0A140T8P9;P01638;A0A075B5K0;P01637	Immunoglobulinkappa chain V-V region L6;Immunoglobulinkappa chain V-V region T1	Igkv14-126	tr|A0A140T8P9|A0A140T8P9_MOUSE Immunoglobulin kappa variable 14-111 (Fragment) OS=Mus musculus OX=10090 GN=Igkv14-111 PE=4 SV=2;sp|P01638|KV5A6_MOUSE Ig kappa chain V-V region L6 (Fragment) OS=Mus musculus OX=10090 PE=4 SV=1;tr|A0A075B5K0|A0A075B5K0_MOUSE	2	56848000	13031000	25147000	27474000	27239000	39003000	57810000	319865	360188	12936000	25754000	28148000	400566	376107	9371200	7133900	24827000	747486	312879	5496300	20835000	385656	58859000	478808	11406000	10628000	16334000	29458000	620123	330431	17654000	448316
A0A171KXD3	A0A171KXD3;Q9JIF0-3;Q9JIF0-2;Q9JIF0;A0A140LHF7;A0A140LJ70;A0A140LJ68;A0A140LI33;A0A140LJF4;A0A140LHS4	Protein arginine N-methyltransferase 1	Prmt1	tr|A0A171KXD3|A0A171KXD3_MOUSE Protein arginine N-methyltransferase 1 OS=Mus musculus OX=10090 GN=Prmt1 PE=1 SV=1;sp|Q9JIF0-3|ANM1_MOUSE Isoform 3 of Protein arginine N-methyltransferase 1 OS=Mus musculus OX=10090 GN=Prmt1;sp|Q9JIF0-2|ANM1_MOUSE Isoform 2	3	13176000	10962000	8547500	356080	8947600	11234000	11287000	319865	7600500	350936	7381200	361612	7989400	7845000	409718	10896000	10022000	747486	10525000	746728	9577700	8041400	9383500	10397000	466503	8446400	10248000	9282200	7460500	10297000	10481000	10941000
A0A1B0GQZ1	A0A1B0GQZ1;A0A1B0GSZ9;O35972	39S ribosomal protein L23, mitochondrial	Mrpl23	tr|A0A1B0GQZ1|A0A1B0GQZ1_MOUSE 39S ribosomal protein L23, mitochondrial OS=Mus musculus OX=10090 GN=Mrpl23 PE=1 SV=1;tr|A0A1B0GSZ9|A0A1B0GSZ9_MOUSE 39S ribosomal protein L23, mitochondrial OS=Mus musculus OX=10090 GN=Mrpl23 PE=1 SV=1;sp|O35972|RM23_MOUSE 3	1	490483	430182	396905	5466100	346898	5053900	560352	319865	4927800	5592600	336680	361612	400566	376107	409718	389028	10233000	7451200	8379500	9874900	580933	385656	4199500	478808	466503	344674	9451900	8445500	7935000	7186000	325998	7421400
A0A1B0GRI0	A0A1B0GRI0;A0A1B0GSK5;A0A1B0GR19;A0A1B0GR86;Q8BH97	Reticulocalbin-3	Rcn3	tr|A0A1B0GRI0|A0A1B0GRI0_MOUSE Reticulocalbin-3 (Fragment) OS=Mus musculus OX=10090 GN=Rcn3 PE=1 SV=1;tr|A0A1B0GSK5|A0A1B0GSK5_MOUSE Reticulocalbin-3 (Fragment) OS=Mus musculus OX=10090 GN=Rcn3 PE=1 SV=1;tr|A0A1B0GR19|A0A1B0GR19_MOUSE Reticulocalbin-3 (Fra	1	6517000	430182	4964300	3854400	346898	8634500	5437800	319865	360188	5397300	5096700	6206300	400566	376107	6574200	7208500	342233	747486	5629900	746728	3524700	385656	8582100	5621300	5248000	5356700	451250	5702100	620123	6018000	325998	448316
A0A1B0GSH5	A0A1B0GSH5;D3YWG2;G8JL55;A0A0R4J058;A0A0R4J242;Q922Q9-2;Q922Q9	Chitinase domain-containing protein 1	Chid1	tr|A0A1B0GSH5|A0A1B0GSH5_MOUSE Chitinase domain-containing protein 1 OS=Mus musculus OX=10090 GN=Chid1 PE=1 SV=1;tr|D3YWG2|D3YWG2_MOUSE Chitinase domain-containing protein 1 (Fragment) OS=Mus musculus OX=10090 GN=Chid1 PE=1 SV=1;tr|G8JL55|G8JL55_MOUSE Chit	4	8695900	5017700	4822600	3453800	4620600	6105600	4665300	5299300	360188	3843700	6100200	3937200	5910400	5018700	4212200	3996500	4288500	3244000	3696700	3096700	580933	4355100	4668300	7394600	7953000	4416600	5099200	7272900	4019000	330431	2312600	4659200
A0A1B0GSU0	A0A1B0GSU0;Q571I9;D3Z0B9;A0A1B0GSN3	Aldehyde dehydrogenase family 16 member A1	Aldh16a1	tr|A0A1B0GSU0|A0A1B0GSU0_MOUSE Aldehyde dehydrogenase family 16 member A1 OS=Mus musculus OX=10090 GN=Aldh16a1 PE=1 SV=1;sp|Q571I9|A16A1_MOUSE Aldehyde dehydrogenase family 16 member A1 OS=Mus musculus OX=10090 GN=Aldh16a1 PE=1 SV=2;tr|D3Z0B9|D3Z0B9_MOUSE	7	1250200	3448900	3528000	3211800	479980	682790	11847000	902810	735850	4537700	336680	3916100	900770	828890	3754700	3167000	920560	62239000	3466700	46009000	580933	1026900	4016800	478808	2396800	666230	451250	533930	45895000	5527700	5470000	962720
A0A1D5RLS1	A0A1D5RLS1;Q60902-3;Q60902-4;Q60902-2;Q60902	Epidermal growth factor receptor substrate 15-like 1	Eps15l1	tr|A0A1D5RLS1|A0A1D5RLS1_MOUSE Epidermal growth factor receptor substrate 15-like 1 OS=Mus musculus OX=10090 GN=Eps15l1 PE=1 SV=1;sp|Q60902-3|EP15R_MOUSE Isoform 3 of Epidermal growth factor receptor substrate 15-like 1 OS=Mus musculus OX=10090 GN=Eps15l1;	5	5784500	430182	3945900	3618600	4660600	4098100	4317000	319865	4320300	4461700	336680	4623800	400566	5060300	2820700	389028	3439300	5926700	4053200	6962000	580933	2383500	323890	478808	4153700	5251500	5198700	415610	5665200	2902200	2925500	448316
A0A1D5RM74	A0A1D5RM74;O54833;A0A1D5RM55;A0A1D5RLE4	Casein kinase II subunit alpha	Csnk2a2	tr|A0A1D5RM74|A0A1D5RM74_MOUSE Casein kinase II subunit alpha (Fragment) OS=Mus musculus OX=10090 GN=Csnk2a2 PE=1 SV=1;sp|O54833|CSK22_MOUSE Casein kinase II subunit alpha OS=Mus musculus OX=10090 GN=Csnk2a2 PE=1 SV=1;tr|A0A1D5RM55|A0A1D5RM55_MOUSE Casei	2	2425600	2217200	1904500	1087900	1907400	1302400	1736900	1316900	1739800	350936	1641200	1906600	1339400	1629000	1362400	1383700	1544700	1337500	1251800	1735800	580933	2021800	1275000	1236400	1782700	1571500	1550400	1236200	1921500	1657500	1402200	1420300
A0A1D5RMD4	A0A1D5RMD4;E7FLY0;B1AVY7	Kinesin-like protein;Kinesin-like protein KIF16B	Kif16b	tr|A0A1D5RMD4|A0A1D5RMD4_MOUSE Kinesin-like protein KIF16B OS=Mus musculus OX=10090 GN=Kif16b PE=1 SV=1;tr|E7FLY0|E7FLY0_MOUSE Kinesin superfamily protein 16B OS=Mus musculus OX=10090 GN=Kif16b PE=1 SV=1;sp|B1AVY7|KI16B_MOUSE Kinesin-like protein KIF16B OS	2	490483	430182	396905	356080	346898	499532	560352	319865	360188	350936	336680	361612	400566	376107	409718	389028	5349100	747486	312879	3244400	15981000	11575000	93212000	19434000	25237000	1679800	9250900	35091000	620123	3037000	29387000	13213000
A0A1D5RMK9	A0A1D5RMK9;Q8BYZ7	Engulfment and cell motility protein 3	Elmo3	tr|A0A1D5RMK9|A0A1D5RMK9_MOUSE Engulfment and cell motility protein 3 OS=Mus musculus OX=10090 GN=Elmo3 PE=1 SV=1;sp|Q8BYZ7|ELMO3_MOUSE Engulfment and cell motility protein 3 OS=Mus musculus OX=10090 GN=Elmo3 PE=1 SV=2	1	490483	430182	6816500	356080	346898	9052700	560352	319865	360188	350936	336680	8730100	400566	6493900	409718	389028	342233	747486	312879	746728	580933	385656	323890	8823500	466503	344674	451250	415610	620123	330431	325998	10141000
A0A1L1SQA2	A0A1L1SQA2;Q9CQV1	Mitochondrial import inner membrane translocase subunit TIM16	Pam16	tr|A0A1L1SQA2|A0A1L1SQA2_MOUSE Predicted gene 9803 OS=Mus musculus OX=10090 GN=Gm9803 PE=1 SV=1;sp|Q9CQV1|TIM16_MOUSE Mitochondrial import inner membrane translocase subunit TIM16 OS=Mus musculus OX=10090 GN=Pam16 PE=1 SV=1	1	17650000	18501000	15423000	17989000	19973000	13344000	15475000	319865	12616000	22514000	15737000	13443000	15722000	12503000	21648000	22168000	342233	10868000	24955000	23888000	580933	385656	18151000	12425000	16040000	13658000	15896000	16945000	13164000	30757000	19692000	18087000
A0A1L1SSA3	A0A1L1SSA3;Q9CXU9;J3QPZ8;J3QN87	Eukaryotic translation initiation factor 1b	Eif1b;Eif1	tr|A0A1L1SSA3|A0A1L1SSA3_MOUSE Eukaryotic translation initiation factor 1b (Fragment) OS=Mus musculus OX=10090 GN=Eif1b PE=1 SV=1;sp|Q9CXU9|EIF1B_MOUSE Eukaryotic translation initiation factor 1b OS=Mus musculus OX=10090 GN=Eif1b PE=1 SV=2;tr|J3QPZ8|J3QPZ8	2	3972500	4905100	4770800	5021400	3184200	4999900	3858200	6283500	360188	5512300	336680	6008200	4357400	376107	6305600	6638900	7914200	747486	5243800	4021800	580933	5425400	323890	5803800	5060600	5907300	5341400	6542600	620123	330431	6644900	448316
A0A1L1STB7	A0A1L1STB7;Q9D9D3	TBC1 domain family, member 21	Tbc1d21	tr|A0A1L1STB7|A0A1L1STB7_MOUSE TBC1 domain family member 21 OS=Mus musculus OX=10090 GN=Tbc1d21 PE=4 SV=1;sp|Q9D9D3|TBC21_MOUSE TBC1 domain family member 21 OS=Mus musculus OX=10090 GN=Tbc1d21 PE=1 SV=1	1	490483	430182	396905	356080	346898	499532	560352	319865	360188	11985000	336680	361612	400566	376107	409718	389028	342233	747486	312879	746728	580933	8599400	7740800	478808	466503	344674	451250	415610	620123	330431	325998	448316
A0A1L1SUB2	A0A1L1SUB2;A0A1L1SRV0;Q08091-2;Q08091	Calponin-1	Cnn1	tr|A0A1L1SUB2|A0A1L1SUB2_MOUSE Calponin (Fragment) OS=Mus musculus OX=10090 GN=Cnn1 PE=1 SV=1;tr|A0A1L1SRV0|A0A1L1SRV0_MOUSE Calponin OS=Mus musculus OX=10090 GN=Cnn1 PE=1 SV=1;sp|Q08091-2|CNN1_MOUSE Isoform Beta of Calponin-1 OS=Mus musculus OX=10090 GN=C	1	490483	430182	396905	356080	346898	499532	560352	319865	360188	350936	336680	361612	400566	376107	409718	389028	342233	747486	312879	746728	580933	385656	323890	478808	466503	344674	451250	415610	620123	330431	325998	448316
A0A1L1SUD9	A0A1L1SUD9;A0A2I3BPI0	Coiled-coil domain containing 187	Ccdc187	tr|A0A1L1SUD9|A0A1L1SUD9_MOUSE Coiled-coil domain-containing protein 187 OS=Mus musculus OX=10090 GN=Ccdc187 PE=1 SV=1;tr|A0A2I3BPI0|A0A2I3BPI0_MOUSE Coiled-coil domain-containing protein 187 OS=Mus musculus OX=10090 GN=Ccdc187 PE=1 SV=1	1	37105000	34229000	396905	356080	43437000	36813000	560352	319865	46307000	350936	336680	31139000	400566	42689000	45582000	26804000	342233	747486	312879	746728	19075000	29253000	24556000	478808	466503	344674	451250	19089000	620123	330431	325998	33527000
A0A1L1SUI3	A0A1L1SUI3;Q9D1F9;A0A1L1SUV7	Solute carrier family 37 (glucose-6-phosphate transporter), member 4	Slc37a4	tr|A0A1L1SUI3|A0A1L1SUI3_MOUSE Solute carrier family 37 (glucose-6-phosphate transporter), member 4 OS=Mus musculus OX=10090 GN=Slc37a4 PE=1 SV=1;tr|Q9D1F9|Q9D1F9_MOUSE Solute carrier family 37 (Glucose-6-phosphate transporter), member 4 OS=Mus musculus OX	3	490483	430182	396905	356080	346898	499532	6582700	319865	360188	350936	336680	1908200	400566	376107	1132400	389028	342233	61220000	312879	59234000	580933	3298500	323890	478808	1494800	344674	451250	415610	27953000	2168800	325998	1835900
A0A1L1SUX8	A0A1L1SUX8;P01831	Thy-1 membrane glycoprotein	Thy1	tr|A0A1L1SUX8|A0A1L1SUX8_MOUSE Thy-1 antigen (Fragment) OS=Mus musculus OX=10090 GN=Thy1 PE=1 SV=1;sp|P01831|THY1_MOUSE Thy-1 membrane glycoprotein OS=Mus musculus OX=10090 GN=Thy1 PE=1 SV=1	2	11042000	430182	6673100	6624900	7063000	13993000	6681300	12075000	5664200	350936	9109400	361612	6824000	8544700	409718	6441800	342233	747486	312879	746728	580933	385656	323890	6493000	5327700	8974100	4963400	415610	620123	330431	325998	2839600
A0A1Q1PRS4	A0A1Q1PRS4;A2A9Z1;A2A9Z2	Dystrophin Dp71 delta110 isoform	Dmd	tr|A0A1Q1PRS4|A0A1Q1PRS4_MOUSE Dystrophin OS=Mus musculus OX=10090 GN=Dmd PE=1 SV=1;tr|A2A9Z1|A2A9Z1_MOUSE Dystrophin OS=Mus musculus OX=10090 GN=Dmd PE=1 SV=1;tr|A2A9Z2|A2A9Z2_MOUSE Dystrophin OS=Mus musculus OX=10090 GN=Dmd PE=1 SV=1	1	490483	430182	396905	356080	346898	499532	215940	319865	360188	350936	336680	361612	400566	376107	409718	389028	342233	543280	312879	589100	580933	385656	323890	478808	466503	344674	451250	415610	399200	330431	325998	448316
A0A1W2P6V8	A0A1W2P6V8;J3KMK0;L7N209;Q3TGM7;Q69ZS7-3;Q69ZS7-2;Q69ZS7	HBS1-like protein	Gm9923;Hbs1l	tr|A0A1W2P6V8|A0A1W2P6V8_MOUSE HBS1-like protein (Fragment) OS=Mus musculus OX=10090 GN=Hbs1l PE=1 SV=1;tr|J3KMK0|J3KMK0_MOUSE HBS1-like protein OS=Mus musculus OX=10090 GN=Hbs1l PE=1 SV=2;tr|L7N209|L7N209_MOUSE HBS1-like protein OS=Mus musculus OX=10090 G	1	490483	430182	396905	356080	346898	499532	560352	319865	360188	350936	336680	361612	400566	376107	409718	389028	342233	9313200	9253200	10085000	580933	385656	323890	478808	9104900	344674	6958900	8364800	11994000	5682100	8267800	7030300
A0A1W2P768	A0A1W2P768;P84228;F8WI35;P68433;E0CYN1;E0CYR7	Histone H3.2;Histone H3;Histone H3.1	Hist1h3b;H3f3a;Hist1h3a	tr|A0A1W2P768|A0A1W2P768_MOUSE Histone H3.2 OS=Mus musculus OX=10090 GN=H3c14 PE=1 SV=1;sp|P84228|H32_MOUSE Histone H3.2 OS=Mus musculus OX=10090 GN=H3c2 PE=1 SV=2;tr|F8WI35|F8WI35_MOUSE Histone H3 OS=Mus musculus OX=10090 GN=H3f3a PE=1 SV=1;sp|P68433|H31_	1	2729100	4162500	2903100	7095400	3547500	2517800	5554000	319865	3193700	3573900	2052800	5630400	5017800	8349200	6179600	5993200	3810900	7672000	5949200	6317200	580933	4327100	1771300	1455700	4787000	6619100	6879800	6371100	27673000	6248000	9037400	6655400
A0A1W2P7E1	A0A1W2P7E1;Q9CQE6	Histone chaperone ASF1A	Asf1a	tr|A0A1W2P7E1|A0A1W2P7E1_MOUSE Histone chaperone ASF1A (Fragment) OS=Mus musculus OX=10090 GN=Asf1a PE=1 SV=1;sp|Q9CQE6|ASF1A_MOUSE Histone chaperone ASF1A OS=Mus musculus OX=10090 GN=Asf1a PE=1 SV=1	1	490483	430182	1675500	356080	2552000	499532	560352	319865	360188	3283900	336680	361612	400566	376107	409718	389028	342233	747486	3070600	746728	580933	385656	323890	478808	466503	344674	451250	415610	620123	330431	325998	448316
A0A1W2P7I2	A0A1W2P7I2;O70318	Band 4.1-like protein 2	Epb41l2	tr|A0A1W2P7I2|A0A1W2P7I2_MOUSE Band 4.1-like protein 2 OS=Mus musculus OX=10090 GN=Epb41l2 PE=1 SV=1;sp|O70318|E41L2_MOUSE Band 4.1-like protein 2 OS=Mus musculus OX=10090 GN=Epb41l2 PE=1 SV=2	1	421020	379300	397650	328940	286500	401050	357740	299170	358590	387720	336800	353380	347390	386660	375630	358380	290340	835500	360250	962950	580933	263780	264540	266180	461240	285030	314990	319790	461510	255830	299440	448316
A0A1W2P7L7	A0A1W2P7L7;P59708	Splicing factor 3B subunit 6	Sf3b6	tr|A0A1W2P7L7|A0A1W2P7L7_MOUSE Splicing factor 3B subunit 6 (Fragment) OS=Mus musculus OX=10090 GN=Sf3b6 PE=1 SV=1;sp|P59708|SF3B6_MOUSE Splicing factor 3B subunit 6 OS=Mus musculus OX=10090 GN=Sf3b6 PE=1 SV=1	1	490483	430182	10072000	356080	346898	13045000	560352	9625000	360188	350936	336680	361612	400566	376107	409718	389028	342233	23359000	312879	14010000	580933	385656	323890	478808	466503	10275000	451250	415610	15962000	330431	16952000	448316
A0A1W2P7P4	A0A1W2P7P4;P28574-2;P28574	Protein max	Max	tr|A0A1W2P7P4|A0A1W2P7P4_MOUSE Protein max OS=Mus musculus OX=10090 GN=Max PE=1 SV=1;sp|P28574-2|MAX_MOUSE Isoform 2 of Protein max OS=Mus musculus OX=10090 GN=Max;sp|P28574|MAX_MOUSE Protein max OS=Mus musculus OX=10090 GN=Max PE=1 SV=2	1	513670	417540	378270	324710	520990	499440	488890	307170	438440	313180	582040	444620	384610	413980	398210	521980	318720	180900	240250	194290	355460	392670	308540	343330	447440	425510	406350	422550	161920	309150	277440	452980
A0A1W2P7R5	A0A1W2P7R5;A0A1W2P7P6;Q91W52;Q91W52-2	Transmembrane protein 19	Tmem19	tr|A0A1W2P7R5|A0A1W2P7R5_MOUSE Transmembrane protein 19 OS=Mus musculus OX=10090 GN=Tmem19 PE=1 SV=1;tr|A0A1W2P7P6|A0A1W2P7P6_MOUSE Transmembrane protein 19 OS=Mus musculus OX=10090 GN=Tmem19 PE=1 SV=1;sp|Q91W52|TMM19_MOUSE Transmembrane protein 19 OS=Mus	1	490483	3071800	4265300	3642300	5503600	499532	3624300	319865	360188	350936	336680	361612	2014300	376107	2816400	389028	7580600	21547000	5615300	25220000	3586300	11316000	5523000	10771000	466503	3097000	3731600	3456200	11637000	4349700	5501700	6460900
A0A1W2P7X0	A0A1W2P7X0;E9QMV2;Q4KML4	Costars family protein ABRACL	Abracl	tr|A0A1W2P7X0|A0A1W2P7X0_MOUSE Costars family protein ABRACL (Fragment) OS=Mus musculus OX=10090 GN=Abracl PE=1 SV=1;tr|E9QMV2|E9QMV2_MOUSE Costars family protein ABRACL OS=Mus musculus OX=10090 GN=Abracl PE=1 SV=1;sp|Q4KML4|ABRAL_MOUSE Costars family prot	1	56897000	60109000	51508000	45226000	56253000	56307000	44333000	319865	46877000	55643000	46639000	44824000	44972000	46943000	47868000	65844000	47123000	35036000	54796000	34916000	580933	46779000	47243000	41693000	49753000	54586000	40199000	51269000	37138000	36567000	35297000	33205000
A0A1W2P8C0	A0A1W2P8C0;Q80UE4;Q80UE5	Erythrocyte membrane protein band 4.1 like 2	Epb4.1l2	tr|A0A1W2P8C0|A0A1W2P8C0_MOUSE Band 4.1-like protein 2 (Fragment) OS=Mus musculus OX=10090 GN=Epb41l2 PE=1 SV=1;tr|Q80UE4|Q80UE4_MOUSE Band 4.1-like protein 2 OS=Mus musculus OX=10090 GN=Epb41l2 PE=1 SV=1;tr|Q80UE5|Q80UE5_MOUSE Band 4.1-like protein 2 OS=M	1	490483	430182	396905	356080	346898	499532	560352	319865	360188	350936	336680	361612	400566	376107	409718	389028	342233	747486	312879	746728	580933	385656	323890	478808	466503	344674	451250	415610	620123	330431	325998	448316
A0A1Y7VJZ2	A0A1Y7VJZ2;A0A1Y7VNC1	maleylacetoacetate isomerase	Gstz1	tr|A0A1Y7VJZ2|A0A1Y7VJZ2_MOUSE Maleylacetoacetate isomerase OS=Mus musculus OX=10090 GN=Gstz1 PE=1 SV=1;tr|A0A1Y7VNC1|A0A1Y7VNC1_MOUSE Maleylacetoacetate isomerase OS=Mus musculus OX=10090 GN=Gstz1 PE=1 SV=1	1	2165300000	3296100000	2060200000	3727600000	2992400000	2591400000	2133000000	2904700000	2642600000	3012300000	2445200000	3234200000	2697500000	2521600000	3391500000	3531200000	2546900000	1089800000	3262800000	1124500000	6096200000	1948700000	3112600000	3355400000	1686900000	2587600000	2663300000	2348900000	1206700000	3281400000	1374100000	2280700000
A0A1Y7VNT1	A0A1Y7VNT1;E9QKB2;Q9JKS5	Intracellular hyaluronan-binding protein 4	Habp4	tr|A0A1Y7VNT1|A0A1Y7VNT1_MOUSE Intracellular hyaluronan-binding protein 4 OS=Mus musculus OX=10090 GN=Habp4 PE=1 SV=1;tr|E9QKB2|E9QKB2_MOUSE Intracellular hyaluronan-binding protein 4 OS=Mus musculus OX=10090 GN=Habp4 PE=1 SV=1;sp|Q9JKS5|HABP4_MOUSE Intrac	1	9367500	10638000	10520000	13763000	8212900	10294000	560352	10944000	8275000	12487000	8411900	9243300	11644000	7636500	10091000	9832300	12696000	11887000	14037000	10630000	7532100	12269000	12850000	10421000	10085000	13864000	7697200	10613000	10386000	13705000	12994000	9651300
A0A286YDI8	A0A286YDI8;G3X972;A0A286YD08;A0A2I3BQS4	Sec24 related gene family, member C (S. cerevisiae)	Sec24c	tr|A0A286YDI8|A0A286YDI8_MOUSE Sec24-related gene family, member C (S. cerevisiae) OS=Mus musculus OX=10090 GN=Sec24c PE=1 SV=1;tr|G3X972|G3X972_MOUSE Sec24-related gene family, member C (S. cerevisiae) OS=Mus musculus OX=10090 GN=Sec24c PE=1 SV=1	8	1628200	3203600	2063100	4924000	4516000	548980	9375800	5891300	1914200	3537200	336680	4035700	2711700	3420700	3640500	2823500	3329300	55738000	7069000	51774000	580933	5685200	4795400	4103400	3348200	1614200	8402700	5066500	35982000	6290100	2542600	9095400
A0A2I3BQ34	A0A2I3BQ34;Q3U2V3	8-oxo-dGDP phosphatase NUDT18	Nudt18	tr|A0A2I3BQ34|A0A2I3BQ34_MOUSE 8-oxo-dGDP phosphatase NUDT18 OS=Mus musculus OX=10090 GN=Nudt18 PE=1 SV=1;sp|Q3U2V3|NUD18_MOUSE 8-oxo-dGDP phosphatase NUDT18 OS=Mus musculus OX=10090 GN=Nudt18 PE=1 SV=1	1	1749900	1129200	1294700	1700300	1216900	1439100	1187700	319865	1309100	1516100	1158100	1413800	400566	1320800	1662600	1955900	1075700	1358500	312879	1186800	1787300	1145000	1648200	1630200	1359500	1897600	1799900	1651300	1355000	1474700	1267500	448316
A0A2I3BQE1	A0A2I3BQE1;A0A2I3BRQ1	Expressed sequence AI182371	AI182371	tr|A0A2I3BQE1|A0A2I3BQE1_MOUSE Expressed sequence AI182371 OS=Mus musculus OX=10090 GN=AI182371 PE=1 SV=1;tr|A0A2I3BRQ1|A0A2I3BRQ1_MOUSE Expressed sequence AI182371 OS=Mus musculus OX=10090 GN=AI182371 PE=1 SV=1	1	490483	430182	901260	527710	346898	462270	560352	319865	913520	350936	968640	361612	446260	442790	409718	389028	342233	747486	545240	746728	692890	857730	323890	478808	466503	344674	451250	415610	407300	580800	578380	839850
A0A2I3BRP6	A0A2I3BRP6;Q0KL02-2;Q0KL02-3;Q0KL02;Q0KL02-4;A0A2I3BQT2	Triple functional domain protein	Trio	tr|A0A2I3BRP6|A0A2I3BRP6_MOUSE Triple functional domain protein OS=Mus musculus OX=10090 GN=Trio PE=1 SV=1;sp|Q0KL02-2|TRIO_MOUSE Isoform 2 of Triple functional domain protein OS=Mus musculus OX=10090 GN=Trio;sp|Q0KL02-3|TRIO_MOUSE Isoform 3 of Triple func	3	709190	430182	696120	356080	556190	499532	693290	531780	847700	713740	830690	361612	1075200	708650	409718	637450	738030	747486	312879	746728	580933	772470	624480	842830	983550	668280	451250	917380	620123	654300	578040	894870
A0A2I3BRS9	A0A2I3BRS9;Q8BH93	MAPK-interacting and spindle-stabilizing protein-like	Mapk1ip1l	tr|A0A2I3BRS9|A0A2I3BRS9_MOUSE MAPK-interacting and spindle-stabilizing protein-like (Fragment) OS=Mus musculus OX=10090 GN=Mapk1ip1l PE=1 SV=1;sp|Q8BH93|MISSL_MOUSE MAPK-interacting and spindle-stabilizing protein-like OS=Mus musculus OX=10090 GN=Mapk1ip1	1	490483	430182	11592000	11565000	346898	13659000	12251000	319865	360188	14998000	12159000	14799000	400566	17845000	409718	389028	342233	747486	14789000	746728	580933	12405000	323890	478808	466503	344674	451250	18000000	620123	330431	325998	448316
A0A2R8VHF9	A0A2R8VHF9;E9QPE7;A0A338P6K2;O08638-2;O08638	Myosin-11	Myh11	tr|A0A2R8VHF9|A0A2R8VHF9_MOUSE Myosin-11 OS=Mus musculus OX=10090 GN=Myh11 PE=1 SV=1;tr|E9QPE7|E9QPE7_MOUSE Myosin-11 OS=Mus musculus OX=10090 GN=Myh11 PE=1 SV=2;tr|A0A338P6K2|A0A338P6K2_MOUSE Myosin-11 OS=Mus musculus OX=10090 GN=Myh11 PE=1 SV=1;sp|O08638	2	490483	430182	396905	1790800	3295000	499532	560352	319865	360188	350936	336680	361612	400566	376107	409718	389028	342233	4813800	312879	746728	580933	385656	323890	478808	466503	344674	451250	415610	620123	330431	325998	448316
A0A2R8VK43	A0A2R8VK43;Q91X79	Chymotrypsin-like elastase family member 1	Cela1	tr|A0A2R8VK43|A0A2R8VK43_MOUSE Chymotrypsin-like elastase family member 1 (Fragment) OS=Mus musculus OX=10090 GN=Cela1 PE=1 SV=1;sp|Q91X79|CELA1_MOUSE Chymotrypsin-like elastase family member 1 OS=Mus musculus OX=10090 GN=Cela1 PE=1 SV=1	2	14896000	3019500	396905	356080	346898	4484000	560352	3390500	360188	3563100	336680	361612	4739800	8523200	409718	389028	342233	747486	312879	746728	580933	385656	323890	478808	466503	344674	451250	415610	620123	330431	325998	448316
A0A2R8VKL5	A0A2R8VKL5;E9Q066;G3X9Q6;Q8BWW4;A0A2R8W6Y5	La-related protein 4	Larp4	tr|A0A2R8VKL5|A0A2R8VKL5_MOUSE La-related protein 4 OS=Mus musculus OX=10090 GN=Larp4 PE=1 SV=1;tr|E9Q066|E9Q066_MOUSE La-related protein 4 OS=Mus musculus OX=10090 GN=Larp4 PE=1 SV=1;tr|G3X9Q6|G3X9Q6_MOUSE La-related protein 4 OS=Mus musculus OX=10090 GN=	3	107780000	152290000	62598000	123220000	135670000	137220000	73004000	121000000	101030000	115030000	76033000	361612	186150000	73490000	213060000	51628000	130710000	52055000	175190000	79144000	580933	93803000	68341000	218230000	74027000	191380000	211260000	120980000	72049000	246070000	74595000	127400000
A0A2R8W6T9	A0A2R8W6T9;Q9DBI0	Transmembrane protease serine 6	Tmprss6	tr|A0A2R8W6T9|A0A2R8W6T9_MOUSE Transmembrane protease serine 6 OS=Mus musculus OX=10090 GN=Tmprss6 PE=1 SV=1;sp|Q9DBI0|TMPS6_MOUSE Transmembrane protease serine 6 OS=Mus musculus OX=10090 GN=Tmprss6 PE=1 SV=4	1	490483	3595200	396905	2671100	2395200	499532	560352	1445300	1639900	2013300	1164100	1783900	1622600	376107	2569300	1842900	1928200	747486	312879	746728	580933	385656	323890	478808	466503	2031100	451250	415610	620123	330431	325998	448316
A0A2R8W710	A0A2R8W710;A0A0R4J0J3;Q75NR7;Q75NR7-2	ATP-dependent DNA helicase Q4	Recql4	tr|A0A2R8W710|A0A2R8W710_MOUSE DNA helicase OS=Mus musculus OX=10090 GN=Recql4 PE=1 SV=1;tr|A0A0R4J0J3|A0A0R4J0J3_MOUSE DNA helicase OS=Mus musculus OX=10090 GN=Recql4 PE=1 SV=1;sp|Q75NR7|RECQ4_MOUSE ATP-dependent DNA helicase Q4 OS=Mus musculus OX=10090 G	1	84463000	59534000	46274000	66317000	10412000	40176000	54047000	36331000	85113000	60996000	80269000	38631000	62273000	50214000	409718	60814000	28708000	18052000	42716000	23600000	57367000	385656	323890	57849000	24217000	53733000	70482000	56252000	28921000	23730000	27882000	37732000
A0A2R8W734	A0A2R8W734;Q99KC7	Small cell adhesion glycoprotein	Smagp	tr|A0A2R8W734|A0A2R8W734_MOUSE Small cell adhesion glycoprotein OS=Mus musculus OX=10090 GN=Smagp PE=1 SV=1;sp|Q99KC7|SMAGP_MOUSE Small cell adhesion glycoprotein OS=Mus musculus OX=10090 GN=Smagp PE=1 SV=2	1	490483	430182	14497000	356080	17749000	12828000	12248000	319865	10290000	350936	15491000	13154000	17669000	6796200	9844200	389028	9710500	747486	312879	746728	580933	385656	11249000	20454000	466503	7728600	13017000	13862000	620123	330431	325998	14690000
A0A338P6G6	A0A338P6G6;A0A384DV79;P17095-1	High mobility group AT-hook 1		tr|A0A338P6G6|A0A338P6G6_MOUSE High mobility group protein HMG-I/HMG-Y OS=Mus musculus OX=10090 GN=Hmga1 PE=1 SV=1;tr|A0A384DV79|A0A384DV79_MOUSE High mobility group protein HMG-I/HMG-Y OS=Mus musculus OX=10090 GN=Hmga1 PE=1 SV=1;sp|P17095-1|HMGA1_MOUSE Is	1	4225100	3935900	3323300	3230100	3909800	4910200	2955500	2745900	2818600	3762500	3480400	3853800	4183700	3709000	3663700	2987200	3662400	1303000	3191200	1904000	3200600	4421300	2408300	4202300	4256400	3050600	4309800	4597200	1771300	3814800	2693300	4078100
A0A338P795	A0A338P795;Q6PE70;G5E8F8;O70309;O70309-2	Integrin beta;Integrin beta-5	Itgb5	tr|A0A338P795|A0A338P795_MOUSE Integrin beta OS=Mus musculus OX=10090 GN=Itgb5 PE=1 SV=1;tr|Q6PE70|Q6PE70_MOUSE Integrin beta OS=Mus musculus OX=10090 GN=Itgb5 PE=1 SV=1;tr|G5E8F8|G5E8F8_MOUSE Integrin beta OS=Mus musculus OX=10090 GN=Itgb5 PE=1 SV=1;sp|O7	1	490483	1206600	797940	356080	346898	499532	560352	319865	642980	350936	336680	361612	400566	376107	409718	389028	342233	747486	312879	746728	580933	385656	323890	478808	466503	344674	451250	735080	620123	330431	325998	638810
A0A3B2W441	A0A3B2W441;G5E814;Q9D8B4	NADH dehydrogenase [ubiquinone] 1 alpha subcomplex subunit 11	Ndufa11	tr|A0A3B2W441|A0A3B2W441_MOUSE Complex I-B14.7 OS=Mus musculus OX=10090 GN=Ndufa11 PE=1 SV=1;tr|G5E814|G5E814_MOUSE Complex I-B14.7 OS=Mus musculus OX=10090 GN=Ndufa11 PE=1 SV=1;sp|Q9D8B4|NDUAB_MOUSE NADH dehydrogenase [ubiquinone] 1 alpha subcomplex subun	1	490483	430182	396905	356080	346898	499532	560352	319865	360188	350936	336680	361612	400566	376107	409718	389028	342233	747486	312879	8447800	580933	385656	12301000	478808	466503	344674	451250	415610	620123	330431	325998	10194000
A0A3B2W889	A0A3B2W889;Q921C3-2;Q921C3	Bromodomain and WD repeat-containing protein 1	Brwd1	tr|A0A3B2W889|A0A3B2W889_MOUSE Bromodomain and WD repeat-containing protein 1 (Fragment) OS=Mus musculus OX=10090 GN=Brwd1 PE=1 SV=1;sp|Q921C3-2|BRWD1_MOUSE Isoform B of Bromodomain and WD repeat-containing protein 1 OS=Mus musculus OX=10090 GN=Brwd1;sp|Q9	1	490483	27122000	17138000	356080	23292000	499532	560352	28522000	360188	350936	21069000	35552000	400566	21836000	29422000	27546000	61950000	747486	26766000	24911000	580933	32391000	47208000	478808	28052000	19093000	451250	20894000	620123	330431	47516000	20036000
A0A3B2WBC6	A0A3B2WBC6	Polymerase (RNA) II (DNA directed) polypeptide M		tr|A0A3B2WBC6|A0A3B2WBC6_MOUSE DNA-directed RNA polymerase II subunit GRINL1A OS=Mus musculus OX=10090 GN=Polr2m PE=4 SV=1	1	490483	430182	5318500	356080	5048900	499532	3653300	319865	17843000	4809400	336680	5146600	400566	376107	409718	389028	3636100	747486	312879	746728	580933	385656	3874900	478808	466503	344674	451250	4167000	620123	330431	325998	448316
A0A3B2WCH2	A0A3B2WCH2;Q9QYS9-5;Q9QYS9-8;Q9QYS9-4;Q9QYS9-3;Q9QYS9-6;Q9QYS9-2;Q9QYS9;Q9QYS9-7	Protein quaking	Qki	tr|A0A3B2WCH2|A0A3B2WCH2_MOUSE Quaking (Fragment) OS=Mus musculus OX=10090 GN=Qk PE=1 SV=1;sp|Q9QYS9-5|QKI_MOUSE Isoform 5 of Protein quaking OS=Mus musculus OX=10090 GN=Qki;sp|Q9QYS9-8|QKI_MOUSE Isoform 8 of Protein quaking OS=Mus musculus OX=10090 GN=Qki	1	8901200	10395000	8235300	8589900	11067000	9932600	7756000	319865	7415400	7152600	7118800	9971500	400566	7759200	10533000	10739000	342233	747486	312879	746728	580933	385656	323890	9378000	9494800	9904400	451250	415610	620123	330431	9370700	7527700
A0A3B2WCL5	A0A3B2WCL5;Q9CT10	Ran-binding protein 3	Ranbp3	tr|A0A3B2WCL5|A0A3B2WCL5_MOUSE Ran-binding protein 3 OS=Mus musculus OX=10090 GN=Ranbp3 PE=1 SV=1;sp|Q9CT10|RANB3_MOUSE Ran-binding protein 3 OS=Mus musculus OX=10090 GN=Ranbp3 PE=1 SV=2	2	490483	430182	3835400	2873300	5709300	4901100	560352	319865	360188	350936	336680	361612	400566	4110500	4200100	389028	4800200	3441600	4017000	4618200	580933	5231200	5051600	4290000	3755600	4398700	3018000	4011800	2822300	2970900	325998	4406600
A0A3Q4EBK4	A0A3Q4EBK4;Q6P1B9;O08539-2;O08539;A0A3Q4EBR8	Myc box-dependent-interacting protein 1	Bin1	tr|A0A3Q4EBK4|A0A3Q4EBK4_MOUSE Myc box-dependent-interacting protein 1 OS=Mus musculus OX=10090 GN=Bin1 PE=1 SV=1;tr|Q6P1B9|Q6P1B9_MOUSE Bin1 protein OS=Mus musculus OX=10090 GN=Bin1 PE=1 SV=1;sp|O08539-2|BIN1_MOUSE Isoform 2 of Myc box-dependent-interacti	3	490483	5852100	4038100	5253400	4231700	499532	4191000	5378200	3956100	3426800	3506300	5211300	4844900	3685400	5578300	5710100	5536700	747486	6623500	6383800	4368100	5428600	7627500	4041000	7695500	344674	451250	5347000	5176900	5400500	3838500	4854100
A0A3Q4EBV4	A0A3Q4EBV4;Q3TJZ6	Protein FAM98A	Fam98a	tr|A0A3Q4EBV4|A0A3Q4EBV4_MOUSE Protein FAM98A OS=Mus musculus OX=10090 GN=Fam98a PE=1 SV=1;sp|Q3TJZ6|FA98A_MOUSE Protein FAM98A OS=Mus musculus OX=10090 GN=Fam98a PE=1 SV=1	1	490483	430182	396905	356080	346898	499532	560352	319865	360188	350936	336680	361612	400566	376107	409718	389028	342233	12402000	312879	10500000	580933	385656	323890	478808	466503	344674	451250	415610	11775000	330431	325998	448316
A0A3Q4EGT0	A0A3Q4EGT0;A0A3Q4EII3;A0A3Q4EC50;A0A3Q4EHW7;Q3UTM6;A0A3Q4EHG2;Q8JZY2	COMM domain-containing protein 10	Commd10	tr|A0A3Q4EGT0|A0A3Q4EGT0_MOUSE COMM domain-containing protein 10 OS=Mus musculus OX=10090 GN=Commd10 PE=1 SV=1;tr|A0A3Q4EII3|A0A3Q4EII3_MOUSE COMM domain-containing protein 10 OS=Mus musculus OX=10090 GN=Commd10 PE=1 SV=1;tr|A0A3Q4EC50|A0A3Q4EC50_MOUSE COM	1	5357000	430182	11842000	8617700	9042600	9008300	6419100	4450200	360188	9118500	336680	7605700	9803000	7421700	9257700	8199400	342233	5415200	7013400	6762600	8687200	8012500	13082000	8592400	466503	7821100	7505100	8947000	620123	330431	325998	8021400
A0A494B9Q5	A0A494B9Q5;Q8CI33-2;Q8CI33	CWF19-like protein 1	Cwf19l1	tr|A0A494B9Q5|A0A494B9Q5_MOUSE CWF19-like protein 1 (Fragment) OS=Mus musculus OX=10090 GN=Cwf19l1 PE=1 SV=1;sp|Q8CI33-2|C19L1_MOUSE Isoform 2 of CWF19-like protein 1 OS=Mus musculus OX=10090 GN=Cwf19l1;sp|Q8CI33|C19L1_MOUSE CWF19-like protein 1 OS=Mus mus	1	314690	320000	396905	296900	467410	499532	560352	319865	281130	402390	395360	407710	400566	376107	383110	389028	342233	747486	277590	736810	580933	385656	323890	478808	779850	344674	451250	415610	620123	326560	325998	552530
A0A494B9Y0	A0A494B9Y0;Q9D5T0;A0A494BAB5;A0A494B9L7	ATPase family AAA domain-containing protein 1	Atad1	tr|A0A494B9Y0|A0A494B9Y0_MOUSE ATPase family AAA domain-containing protein 1 OS=Mus musculus OX=10090 GN=Atad1 PE=1 SV=1;sp|Q9D5T0|ATAD1_MOUSE ATPase family AAA domain-containing protein 1 OS=Mus musculus OX=10090 GN=Atad1 PE=1 SV=1;tr|A0A494BAB5|A0A494BAB	4	2218000	430182	2074500	356080	2730800	1969900	3552200	2478000	2126500	3083200	2514400	361612	2293000	376107	2651200	389028	342233	22301000	2311400	18446000	580933	3236500	323890	1873200	466503	3833100	3611000	2370000	23262000	7505600	2615200	448316
A0A494BAQ4	A0A494BAQ4;Q8CFJ7	Solute carrier family 25 member 45	Slc25a45	tr|A0A494BAQ4|A0A494BAQ4_MOUSE Solute carrier family 25 member 45 OS=Mus musculus OX=10090 GN=Slc25a45 PE=1 SV=1;sp|Q8CFJ7|S2545_MOUSE Solute carrier family 25 member 45 OS=Mus musculus OX=10090 GN=Slc25a45 PE=1 SV=1	1	490483	430182	396905	356080	346898	499532	2521800	319865	360188	350936	336680	361612	400566	376107	409718	389028	342233	4725200	312879	7574600	580933	385656	323890	478808	466503	344674	451250	415610	7270800	330431	325998	448316
A0A494BBC4	A0A494BBC4;F7ABX5;Q3U9H3;D3YZR8;Q61337	Bcl2-associated agonist of cell death	Bad	tr|A0A494BBC4|A0A494BBC4_MOUSE Bcl2-associated agonist of cell death OS=Mus musculus OX=10090 GN=Bad PE=1 SV=1;tr|F7ABX5|F7ABX5_MOUSE Bcl2-associated agonist of cell death (Fragment) OS=Mus musculus OX=10090 GN=Bad PE=1 SV=1;tr|Q3U9H3|Q3U9H3_MOUSE Bcl2-ass	1	490483	11548000	396905	14331000	15211000	13635000	560352	319865	360188	350936	336680	361612	15536000	376107	11741000	389028	342233	747486	312879	746728	580933	8583500	323890	13435000	466503	12824000	15182000	12183000	620123	330431	11744000	448316
A0A494BBP5	A0A494BBP5;P25446	Tumor necrosis factor receptor superfamily member 6	Fas	tr|A0A494BBP5|A0A494BBP5_MOUSE Apo-1 antigen OS=Mus musculus OX=10090 GN=Fas PE=1 SV=1;sp|P25446|TNR6_MOUSE Tumor necrosis factor receptor superfamily member 6 OS=Mus musculus OX=10090 GN=Fas PE=1 SV=2	1	490483	5307600	396905	356080	346898	499532	4692400	319865	4749100	350936	336680	361612	400566	376107	409718	389028	342233	747486	312879	746728	580933	385656	323890	478808	466503	344674	3875900	4653700	620123	330431	325998	448316
A2A4P4	A2A4P4;A2A4P3;Q3THG9	Alanyl-tRNA editing protein Aarsd1	Gm27029;Aarsd1	tr|A2A4P4|A2A4P4_MOUSE Predicted gene, 27029 OS=Mus musculus OX=10090 GN=Gm27029 PE=3 SV=1;tr|A2A4P3|A2A4P3_MOUSE Predicted gene, 27029 OS=Mus musculus OX=10090 GN=Gm27029 PE=3 SV=1;sp|Q3THG9|AASD1_MOUSE Alanyl-tRNA editing protein Aarsd1 OS=Mus musculus O	4	490483	11033000	15294000	13058000	11641000	8133500	13493000	14912000	13680000	19581000	12864000	13475000	12682000	14519000	17268000	8349900	16063000	16069000	13895000	12160000	580933	11990000	10006000	11301000	12244000	11812000	14067000	9648000	16469000	11338000	16399000	16593000
A2A6J4	A2A6J4;A2A6J7;P19973-2;P19973	Lymphocyte-specific protein 1	Lsp1	tr|A2A6J4|A2A6J4_MOUSE Lymphocyte-specific protein 1 OS=Mus musculus OX=10090 GN=Lsp1 PE=1 SV=1;tr|A2A6J7|A2A6J7_MOUSE Lymphocyte-specific protein 1 OS=Mus musculus OX=10090 GN=Lsp1 PE=1 SV=1;sp|P19973-2|LSP1_MOUSE Isoform 2 of Lymphocyte-specific protein	1	490483	430182	396905	356080	346898	499532	560352	319865	360188	350936	336680	1512800	400566	1944500	409718	389028	342233	747486	1370700	746728	580933	1801300	323890	478808	466503	1601200	451250	415610	620123	330431	325998	448316
A2A6K0	A2A6K0;A2A6J8;P13412	Troponin I, fast skeletal muscle	Tnni2	tr|A2A6K0|A2A6K0_MOUSE Troponin I, fast skeletal muscle (Fragment) OS=Mus musculus OX=10090 GN=Tnni2 PE=1 SV=1;tr|A2A6J8|A2A6J8_MOUSE Troponin I, fast skeletal muscle (Fragment) OS=Mus musculus OX=10090 GN=Tnni2 PE=1 SV=1;sp|P13412|TNNI2_MOUSE Troponin I,	2	490483	430182	396905	356080	346898	499532	560352	319865	360188	350936	336680	361612	125140000	376107	409718	389028	342233	747486	312879	746728	580933	385656	323890	478808	60413000	344674	451250	415610	620123	330431	325998	448316
A2A6T4	A2A6T4;Q8R035;D6RHR8;Q8R035-2	Peptidyl-tRNA hydrolase ICT1, mitochondrial	Ict1	tr|A2A6T4|A2A6T4_MOUSE Peptidyl-tRNA hydrolase ICT1, mitochondrial OS=Mus musculus OX=10090 GN=Mrpl58 PE=1 SV=1;sp|Q8R035|ICT1_MOUSE Peptidyl-tRNA hydrolase ICT1, mitochondrial OS=Mus musculus OX=10090 GN=Mrpl58 PE=1 SV=1;tr|D6RHR8|D6RHR8_MOUSE Peptidyl-tR	2	8020600	430182	7361000	356080	346898	499532	560352	319865	6657600	350936	336680	361612	400566	376107	409718	5782300	342233	747486	7169800	746728	580933	385656	323890	478808	466503	344674	451250	415610	620123	330431	325998	448316
A2A977	A2A977;O88833;A2A8T1;F8WGU9;Q91WU1;A2A8S9;A2A8S8	Cytochrome P450 4A10	Cyp4a10;Cyp4a32	tr|A2A977|A2A977_MOUSE Cytochrome P450 4A10 OS=Mus musculus OX=10090 GN=Cyp4a10 PE=1 SV=1;sp|O88833|CP4AA_MOUSE Cytochrome P450 4A10 OS=Mus musculus OX=10090 GN=Cyp4a10 PE=2 SV=2;tr|A2A8T1|A2A8T1_MOUSE Cytochrome P450, family 4, subfamily a, polypeptide 32	13	1835800	823220	1936500	3986000	8145800	499532	9477800	319865	881880	14779000	5639500	5480200	6798500	11667000	409718	2467300	342233	38368000	3935400	40107000	580933	385656	817410	478808	466503	344674	3992200	415610	37826000	330431	3770400	448316
A2A9I0	A2A9I0;O35166	Golgi SNAP receptor complex member 2	Gosr2	tr|A2A9I0|A2A9I0_MOUSE Golgi SNAP receptor complex member 2 OS=Mus musculus OX=10090 GN=Gosr2 PE=1 SV=1;sp|O35166|GOSR2_MOUSE Golgi SNAP receptor complex member 2 OS=Mus musculus OX=10090 GN=Gosr2 PE=1 SV=2	1	490483	430182	1247100	356080	1619100	499532	1531800	319865	1425800	350936	2254600	1102300	400566	1553900	1326200	1080700	1113600	1393900	888320	1778500	1386600	1573000	1392500	1238200	1620200	344674	1190300	1611700	1626800	1135800	1309600	1800800
A2A9W3	A2A9W3;Q3UBZ5;A2A9W1;Q3UBZ5-2	MIF4G domain-containing protein	Mif4gd	tr|A2A9W3|A2A9W3_MOUSE MIF4G domain-containing protein OS=Mus musculus OX=10090 GN=Mif4gd PE=1 SV=1;sp|Q3UBZ5|MI4GD_MOUSE MIF4G domain-containing protein OS=Mus musculus OX=10090 GN=Mif4gd PE=1 SV=1;tr|A2A9W1|A2A9W1_MOUSE MIF4G domain-containing protein (F	4	6144800	430182	5939000	4942200	6362800	6937200	9062800	6190900	7922400	6118500	336680	6099100	6900900	6068300	7121000	4791100	342233	8713600	312879	746728	580933	6822900	6167800	478808	8174900	8529300	451250	415610	8960100	9331700	8923800	6637100
A2AA85	A2AA85;Q6NXN1-2;Q6NXN1	SUZ domain-containing protein 1	Szrd1	tr|A2AA85|A2AA85_MOUSE SUZ domain-containing protein 1 (Fragment) OS=Mus musculus OX=10090 GN=Szrd1 PE=1 SV=1;sp|Q6NXN1-2|SZRD1_MOUSE Isoform 2 of SUZ domain-containing protein 1 OS=Mus musculus OX=10090 GN=Szrd1;sp|Q6NXN1|SZRD1_MOUSE SUZ domain-containing	2	490483	430182	396905	356080	346898	499532	560352	319865	360188	350936	336680	361612	400566	376107	409718	389028	342233	747486	312879	746728	580933	385656	323890	478808	466503	344674	451250	415610	620123	330431	325998	448316
A2ACM0	A2ACM0;Q8K4Q0;E9PXZ5;Q8K4Q0-5;Q8K4Q0-3;Q8K4Q0-2	Regulatory-associated protein of mTOR	Rptor	tr|A2ACM0|A2ACM0_MOUSE Regulatory-associated protein of mTOR OS=Mus musculus OX=10090 GN=Rptor PE=1 SV=1;sp|Q8K4Q0|RPTOR_MOUSE Regulatory-associated protein of mTOR OS=Mus musculus OX=10090 GN=Rptor PE=1 SV=1;tr|E9PXZ5|E9PXZ5_MOUSE Regulatory-associated pr	2	11398000	14298000	396905	13732000	8558000	10774000	18025000	10647000	12761000	350936	11033000	14724000	10413000	376107	10551000	11330000	10670000	17336000	312879	13195000	580933	11930000	11136000	12280000	12562000	6485700	8785400	415610	13666000	9572000	10482000	9711700
A2ADB1	A2ADB1;A2ADB0;Q62504-3;Q62504-2;Q62504	Msx2-interacting protein	Spen	tr|A2ADB1|A2ADB1_MOUSE Msx2-interacting protein OS=Mus musculus OX=10090 GN=Spen PE=1 SV=1;tr|A2ADB0|A2ADB0_MOUSE Msx2-interacting protein OS=Mus musculus OX=10090 GN=Spen PE=1 SV=1;sp|Q62504-3|MINT_MOUSE Isoform 3 of Msx2-interacting protein OS=Mus muscul	2	17126000	18448000	16632000	17137000	17115000	14024000	15518000	16682000	15237000	350936	16990000	25840000	12195000	25749000	17228000	19768000	17400000	14240000	22856000	14523000	580933	15052000	17917000	16755000	17344000	29020000	23095000	20791000	14487000	17560000	17544000	14287000
A2AEW6	A2AEW6;A2AEW5;A2AEW9;A2AEW8;Q8VD04	GRIP1-associated protein 1	Gripap1	tr|A2AEW6|A2AEW6_MOUSE GRIP1-associated protein 1 (Fragment) OS=Mus musculus OX=10090 GN=Gripap1 PE=1 SV=1;tr|A2AEW5|A2AEW5_MOUSE GRIP1-associated protein 1 (Fragment) OS=Mus musculus OX=10090 GN=Gripap1 PE=1 SV=1;tr|A2AEW9|A2AEW9_MOUSE GRIP1-associated pr	1	6532600	4612200	10030000	6580800	6229700	8078600	5523300	10662000	360188	5798200	336680	6278800	5149600	376107	5222800	4797900	342233	747486	312879	746728	580933	6605700	323890	478808	466503	344674	451250	415610	620123	6307000	325998	6206100
A2AFF6	A2AFF6;O35638	Cohesin subunit SA-2	Stag2	tr|A2AFF6|A2AFF6_MOUSE Cohesin subunit SA-2 OS=Mus musculus OX=10090 GN=Stag2 PE=1 SV=1;sp|O35638|STAG2_MOUSE Cohesin subunit SA-2 OS=Mus musculus OX=10090 GN=Stag2 PE=1 SV=3	1	490483	430182	396905	356080	346898	499532	560352	319865	360188	350936	336680	361612	400566	376107	409718	389028	342233	2748900	312879	2597100	580933	385656	323890	478808	466503	344674	451250	415610	3174700	330431	325998	448316
A2AFQ0	A2AFQ0;Q7TMY8-2;Q7TMY8-4;Q7TMY8-3;Q7TMY8;F6UYC1;F6XP90	E3 ubiquitin-protein ligase HUWE1	Huwe1	tr|A2AFQ0|A2AFQ0_MOUSE HECT-type E3 ubiquitin transferase OS=Mus musculus OX=10090 GN=Huwe1 PE=1 SV=1;sp|Q7TMY8-2|HUWE1_MOUSE Isoform 2 of E3 ubiquitin-protein ligase HUWE1 OS=Mus musculus OX=10090 GN=Huwe1;sp|Q7TMY8-4|HUWE1_MOUSE Isoform 4 of E3 ubiquitin	3	490483	430182	535690	356080	346898	499532	559280	319865	360188	350936	336680	361612	400566	376107	409718	389028	342233	1476900	312879	1553500	580933	385656	323890	478808	466503	344674	451250	415610	1831000	330431	325998	448316
A2AHX7	A2AHX7;A2AHX8;A2AHX9;Q9QWX2;Q64373-2;Q64373-3;Q64373-4;Q64373	Bcl-2-like protein 1	Bcl2l1	tr|A2AHX7|A2AHX7_MOUSE Bcl-2-like protein 1 (Fragment) OS=Mus musculus OX=10090 GN=Bcl2l1 PE=1 SV=1;tr|A2AHX8|A2AHX8_MOUSE Bcl-2-like protein 1 (Fragment) OS=Mus musculus OX=10090 GN=Bcl2l1 PE=1 SV=1;tr|A2AHX9|A2AHX9_MOUSE Apoptosis regulator Bcl-X (Fragme	1	7319400	11554000	8389600	8588900	9576200	11053000	8851900	11076000	9460200	12322000	10991000	12311000	11780000	10907000	10739000	10287000	9521800	7233300	13327000	8442700	13421000	11499000	14856000	478808	11330000	13710000	10336000	11003000	7927300	12026000	8848800	10532000
A2AIL4	A2AIL4	NADH dehydrogenase (ubiquinone) complex I, assembly factor 6	Ndufaf6	sp|A2AIL4|NDUF6_MOUSE NADH dehydrogenase (ubiquinone) complex I, assembly factor 6 OS=Mus musculus OX=10090 GN=Ndufaf6 PE=1 SV=1	1	490483	430182	396905	45945	346898	43857	108360	319865	360188	44585	40290	361612	400566	55081	409718	32365	342233	991750	312879	666410	580933	62085	71960	478808	77452	50226	451250	41908	657890	49873	33521	448316
A2AKD6	A2AKD6;Q9JJW0	Peroxisomal membrane protein 4	Pxmp4	tr|A2AKD6|A2AKD6_MOUSE Peroxisomal membrane protein 4 OS=Mus musculus OX=10090 GN=Pxmp4 PE=1 SV=1;sp|Q9JJW0|PXMP4_MOUSE Peroxisomal membrane protein 4 OS=Mus musculus OX=10090 GN=Pxmp4 PE=1 SV=3	4	490483	430182	407780	531360	163200	499532	2454200	319865	360188	350936	336680	361612	400566	376107	409718	389028	342233	55175000	159060	67551000	580933	133780	1004900	478808	617150	344674	451250	415610	70070000	573500	905410	448316
A2AKQ0-2	A2AKQ0-2;A2AKQ0;V9GX08;A0A217FL58	Nucleotide sugar transporter SLC35D1	Slc35d1	sp|A2AKQ0-2|S35D1_MOUSE Isoform 2 of UDP-glucuronic acid/UDP-N-acetylgalactosamine transporter OS=Mus musculus OX=10090 GN=Slc35d1;sp|A2AKQ0|S35D1_MOUSE UDP-glucuronic acid/UDP-N-acetylgalactosamine transporter OS=Mus musculus OX=10090 GN=Slc35d1 PE=2 SV=2	4	490483	430182	396905	356080	346898	499532	2520300	319865	360188	350936	4419900	361612	400566	376107	409718	389028	342233	16586000	312879	23258000	580933	385656	323890	478808	466503	344674	451250	415610	16090000	2104600	325998	448316
A2AMH3	A2AMH3;A2AMH5;A2AMH4;Q6X893;Q6X893-2	Choline transporter-like protein 1	Slc44a1	tr|A2AMH3|A2AMH3_MOUSE Choline transporter-like protein 1 OS=Mus musculus OX=10090 GN=Slc44a1 PE=1 SV=1;tr|A2AMH5|A2AMH5_MOUSE Choline transporter-like protein 1 OS=Mus musculus OX=10090 GN=Slc44a1 PE=1 SV=1;tr|A2AMH4|A2AMH4_MOUSE Choline transporter-like	3	14120000	5321900	4584200	7391500	346898	3024800	560352	319865	360188	5941300	336680	361612	400566	5340800	409718	389028	342233	4844500	4156500	4347800	580933	385656	323890	3263300	466503	344674	451250	415610	620123	330431	325998	448316
A2AN08-3	A2AN08-3;A2AN08;A2AN08-5;F6SSP6;A2AN08-2;Z4YMA7	E3 ubiquitin-protein ligase UBR4	Ubr4	sp|A2AN08-3|UBR4_MOUSE Isoform 3 of E3 ubiquitin-protein ligase UBR4 OS=Mus musculus OX=10090 GN=Ubr4;sp|A2AN08|UBR4_MOUSE E3 ubiquitin-protein ligase UBR4 OS=Mus musculus OX=10090 GN=Ubr4 PE=1 SV=1;sp|A2AN08-5|UBR4_MOUSE Isoform 5 of E3 ubiquitin-protein	10	490483	430182	396905	356080	346898	499532	7845900	319865	360188	350936	336680	361612	400566	376107	409718	389028	342233	10012000	312879	11547000	580933	385656	323890	478808	466503	344674	451250	415610	10678000	330431	325998	448316
A2AP29	A2AP29;Q6Q899;Q6Q899-4;Q6Q899-3	Probable ATP-dependent RNA helicase DDX58	Ddx58	tr|A2AP29|A2AP29_MOUSE Antiviral innate immune response receptor RIG-I (Fragment) OS=Mus musculus OX=10090 GN=Ddx58 PE=1 SV=1;sp|Q6Q899|DDX58_MOUSE Antiviral innate immune response receptor RIG-I OS=Mus musculus OX=10090 GN=Ddx58 PE=1 SV=2;sp|Q6Q899-4|DDX5	2	490483	430182	396905	356080	346898	499532	560352	319865	360188	350936	336680	361612	400566	376107	409718	389028	342233	7760600	312879	746728	580933	385656	323890	478808	466503	344674	451250	415610	7767100	330431	325998	448316
A2AP32	A2AP32;Q3UIU2	NADH dehydrogenase [ubiquinone] 1 beta subcomplex subunit 6	Ndufb6	tr|A2AP32|A2AP32_MOUSE Complex I-B17 OS=Mus musculus OX=10090 GN=Ndufb6 PE=1 SV=1;sp|Q3UIU2|NDUB6_MOUSE NADH dehydrogenase [ubiquinone] 1 beta subcomplex subunit 6 OS=Mus musculus OX=10090 GN=Ndufb6 PE=1 SV=3	1	10112000	14102000	16206000	12265000	10299000	10134000	10961000	13690000	13551000	12768000	11060000	17669000	13554000	10400000	16499000	13152000	23780000	27323000	21181000	24700000	17559000	20551000	26573000	21974000	9314800	12611000	13716000	10644000	20358000	18686000	23570000	20628000
A2AP78	A2AP78;O54879	High mobility group protein B3	Hmgb3	tr|A2AP78|A2AP78_MOUSE High mobility group protein B3 (Fragment) OS=Mus musculus OX=10090 GN=Hmgb3 PE=1 SV=1;sp|O54879|HMGB3_MOUSE High mobility group protein B3 OS=Mus musculus OX=10090 GN=Hmgb3 PE=1 SV=3	3	19463000	18123000	18245000	21398000	346898	499532	18110000	20780000	15967000	16371000	18040000	18315000	400566	16846000	15265000	20651000	19361000	11559000	312879	8745200	15646000	385656	9198700	15204000	13678000	16796000	11691000	15444000	10096000	13460000	13340000	448316
A2APX3	A2APX3;P21460	Cystatin-C	Cst3	tr|A2APX3|A2APX3_MOUSE Cystatin-C (Fragment) OS=Mus musculus OX=10090 GN=Cst3 PE=1 SV=1;sp|P21460|CYTC_MOUSE Cystatin-C OS=Mus musculus OX=10090 GN=Cst3 PE=1 SV=2	1	490483	430182	396905	356080	346898	4700000	560352	319865	360188	350936	3638000	361612	400566	376107	409718	389028	342233	747486	312879	746728	580933	385656	323890	478808	466503	344674	451250	415610	620123	330431	325998	448316
A2AQN4	A2AQN4;Q9QXG4;A2AQN5;F7CU63;D6RHA7	Acetyl-coenzyme A synthetase, cytoplasmic	Acss2	tr|A2AQN4|A2AQN4_MOUSE Propionate--CoA ligase OS=Mus musculus OX=10090 GN=Acss2 PE=1 SV=1;sp|Q9QXG4|ACSA_MOUSE Acetyl-coenzyme A synthetase, cytoplasmic OS=Mus musculus OX=10090 GN=Acss2 PE=1 SV=2;tr|A2AQN5|A2AQN5_MOUSE Propionate--CoA ligase OS=Mus muscul	11	24352000	12371000	15073000	19699000	346898	499532	30656000	319865	16565000	22003000	13382000	9774900	17773000	15652000	16442000	9182400	342233	94307000	312879	52290000	580933	385656	323890	7043800	2432400	344674	4787300	415610	81091000	7434000	19440000	8633000
A2ARZ7	A2ARZ7;P35285;Q3TXV4;Q921E2	Ras-related protein Rab-22A	Rab22a	tr|A2ARZ7|A2ARZ7_MOUSE Ras-related protein Rab-22A OS=Mus musculus OX=10090 GN=Rab22a PE=1 SV=1;sp|P35285|RB22A_MOUSE Ras-related protein Rab-22A OS=Mus musculus OX=10090 GN=Rab22a PE=1 SV=2	4	10949000	14394000	15578000	14040000	11779000	16559000	11206000	11382000	11872000	15463000	14295000	13986000	400566	376107	14949000	20000000	10774000	747486	12949000	746728	580933	12206000	323890	478808	466503	14773000	10075000	12605000	620123	330431	11694000	448316
A2AS05	A2AS05;A2AS03;E9QAM5	Helicase with zinc finger domain 2	Helz2	tr|A2AS05|A2AS05_MOUSE Helicase with zinc finger domain 2 OS=Mus musculus OX=10090 GN=Helz2 PE=1 SV=2;tr|A2AS03|A2AS03_MOUSE Helicase with zinc finger domain 2 OS=Mus musculus OX=10090 GN=Helz2 PE=1 SV=1;sp|E9QAM5|HELZ2_MOUSE Helicase with zinc finger doma	3	490483	430182	396905	356080	346898	499532	560352	319865	360188	350936	336680	361612	400566	376107	409718	389028	342233	747486	312879	746728	580933	385656	323890	478808	466503	344674	451250	415610	620123	330431	325998	448316
A2AS98	A2AS98;P28660-2;P28660	Nck-associated protein 1	Nckap1	tr|A2AS98|A2AS98_MOUSE Nck-associated protein 1 OS=Mus musculus OX=10090 GN=Nckap1 PE=1 SV=1;sp|P28660-2|NCKP1_MOUSE Isoform 2 of Nck-associated protein 1 OS=Mus musculus OX=10090 GN=Nckap1;sp|P28660|NCKP1_MOUSE Nck-associated protein 1 OS=Mus musculus OX=	1	490483	430182	396905	356080	346898	499532	560352	319865	360188	350936	336680	361612	400566	376107	409718	389028	342233	11405000	312879	746728	580933	385656	323890	478808	466503	344674	451250	415610	10905000	330431	325998	448316
A2ASZ8	A2ASZ8;A2ASZ8-4;A2ASZ8-5;A2ASZ8-2;A2ASZ8-3;A0A0A6YWC1;Z4YLR9	Calcium-binding mitochondrial carrier protein SCaMC-2	Slc25a25	sp|A2ASZ8|SCMC2_MOUSE Calcium-binding mitochondrial carrier protein SCaMC-2 OS=Mus musculus OX=10090 GN=Slc25a25 PE=1 SV=1;sp|A2ASZ8-4|SCMC2_MOUSE Isoform 4 of Calcium-binding mitochondrial carrier protein SCaMC-2 OS=Mus musculus OX=10090 GN=Slc25a25;sp|A2	2	490483	430182	396905	356080	346898	499532	1195800	319865	360188	350936	336680	361612	400566	376107	409718	389028	342233	8366300	312879	8044800	580933	385656	773160	478808	466503	344674	451250	415610	6723100	330431	325998	448316
A2AWI9	A2AWI9;A2AWI7;Q8R3V5-3;Q8R3V5-1;Q8R3V5	Endophilin-B2	Sh3glb2	tr|A2AWI9|A2AWI9_MOUSE Endophilin-B2 OS=Mus musculus OX=10090 GN=Sh3glb2 PE=1 SV=1;tr|A2AWI7|A2AWI7_MOUSE Endophilin-B2 OS=Mus musculus OX=10090 GN=Sh3glb2 PE=1 SV=1;sp|Q8R3V5-3|SHLB2_MOUSE Isoform 3 of Endophilin-B2 OS=Mus musculus OX=10090 GN=Sh3glb2;sp|	1	490483	430182	396905	356080	346898	499532	560352	319865	360188	350936	336680	361612	400566	376107	409718	389028	342233	747486	312879	746728	580933	385656	323890	478808	466503	344674	451250	415610	620123	330431	325998	448316
A2AWT6	A2AWT6;A2AWT7;A2AWT5;P25976-2;P25976;G3UZW9;E9Q4A8	Nucleolar transcription factor 1	Ubtf	tr|A2AWT6|A2AWT6_MOUSE Nucleolar transcription factor 1 OS=Mus musculus OX=10090 GN=Ubtf PE=1 SV=1;tr|A2AWT7|A2AWT7_MOUSE Nucleolar transcription factor 1 OS=Mus musculus OX=10090 GN=Ubtf PE=1 SV=1;tr|A2AWT5|A2AWT5_MOUSE Nucleolar transcription factor 1 OS	4	12112000	14741000	16370000	356080	346898	22312000	15037000	14014000	360188	13840000	21583000	16317000	19673000	9403900	20979000	389028	342233	10467000	312879	8440200	580933	18491000	17193000	478808	16234000	14539000	10259000	14366000	9608200	20122000	9700200	10360000
A2BFF8	A2BFF8;Q3TPJ8;A2BFF5;A2BFF9;O88487	Cytoplasmic dynein 1 intermediate chain 2	Dync1i2	tr|A2BFF8|A2BFF8_MOUSE Cytoplasmic dynein 1 intermediate chain 2 OS=Mus musculus OX=10090 GN=Dync1i2 PE=1 SV=1;tr|Q3TPJ8|Q3TPJ8_MOUSE Cytoplasmic dynein 1 intermediate chain 2 OS=Mus musculus OX=10090 GN=Dync1i2 PE=1 SV=1;tr|A2BFF5|A2BFF5_MOUSE Cytoplasmic	1	490483	430182	396905	356080	1141400	499532	560352	319865	1350300	2159000	336680	361612	400566	376107	1676800	389028	342233	747486	1398500	746728	580933	385656	2318900	478808	466503	344674	451250	415610	620123	330431	1151000	448316
A2BIN1	A2BIN1;Q4FZE8	Major urinary protein 10	Mup10;Mup1	tr|A2BIN1|A2BIN1_MOUSE Major urinary protein 10 OS=Mus musculus OX=10090 GN=Mup10 PE=2 SV=1;tr|Q4FZE8|Q4FZE8_MOUSE Major urinary protein 1 OS=Mus musculus OX=10090 GN=Mup22 PE=2 SV=1	1	419950000	868970000	1147200000	1547100000	1949000000	765270000	1604600000	2597000000	1248100000	1122100000	1417700000	1662300000	1930100000	1106600000	2643500000	735830000	2609800000	1504000000	3109900000	1718200000	4646500000	3413500000	3746800000	4647900000	4474700000	2067900000	2990400000	4813000000	2006700000	3107600000	2488300000	3096200000
A3KGL9	A3KGL9;B7ZCQ3;F6W687;P09602	Non-histone chromosomal protein HMG-17	Hmgn2	tr|A3KGL9|A3KGL9_MOUSE Non-histone chromosomal protein HMG-17 OS=Mus musculus OX=10090 GN=Hmgn2 PE=1 SV=1;tr|B7ZCQ3|B7ZCQ3_MOUSE Non-histone chromosomal protein HMG-17 OS=Mus musculus OX=10090 GN=Hmgn2 PE=1 SV=1;tr|F6W687|F6W687_MOUSE Non-histone chromosom	1	9905300	8281300	7052400	10196000	5470200	11266000	5764600	5895800	7745900	11152000	9497000	8641200	9470000	10234000	7929900	7905400	5613200	3267500	4698000	2759000	5318100	7007000	4284700	5700600	4904400	3942800	5046000	4677000	3077100	3637200	4927500	10022000
A7MCT6	A7MCT6;A7MCT6-2;H9KV13	Ethanolamine kinase 2	Etnk2	sp|A7MCT6|EKI2_MOUSE Ethanolamine kinase 2 OS=Mus musculus OX=10090 GN=Etnk2 PE=1 SV=1;sp|A7MCT6-2|EKI2_MOUSE Isoform 2 of Ethanolamine kinase 2 OS=Mus musculus OX=10090 GN=Etnk2;tr|H9KV13|H9KV13_MOUSE Ethanolamine kinase 2 OS=Mus musculus OX=10090 GN=Etnk	2	490483	430182	396905	356080	346898	499532	560352	319865	360188	350936	336680	361612	400566	376107	409718	389028	342233	8146700	312879	5993500	580933	385656	323890	478808	466503	2955100	451250	4451500	6566100	330431	325998	448316
A8XY17	A8XY17;A2A4K0;Q9CQ80-2;Q9CQ80;E9PXS9;A2A4J8	Vacuolar protein-sorting-associated protein 25	Vps25	tr|A8XY17|A8XY17_MOUSE ESCRT-II complex subunit VPS25 OS=Mus musculus OX=10090 GN=Vps25 PE=1 SV=1;tr|A2A4K0|A2A4K0_MOUSE ESCRT-II complex subunit VPS25 OS=Mus musculus OX=10090 GN=Vps25 PE=1 SV=1;sp|Q9CQ80-2|VPS25_MOUSE Isoform 2 of Vacuolar protein-sortin	2	5736300	8351900	9463600	9232500	7244100	4897100	7008600	319865	6362400	11734000	6632100	7578300	7041000	7802900	7385000	7913800	342233	13404000	7534500	8474900	580933	7204100	12373000	478808	7403700	10006000	8907900	7429500	11714000	10204000	10326000	8207000
B1ARB3	B1ARB3;Q08481-2;Q08481-3;Q08481;B1ARA9;Q08481-4	Platelet endothelial cell adhesion molecule	Pecam1	tr|B1ARB3|B1ARB3_MOUSE Platelet endothelial cell adhesion molecule OS=Mus musculus OX=10090 GN=Pecam1 PE=1 SV=1;sp|Q08481-2|PECA1_MOUSE Isoform 2 of Platelet endothelial cell adhesion molecule OS=Mus musculus OX=10090 GN=Pecam1;sp|Q08481-3|PECA1_MOUSE Isof	2	490483	430182	1570300	1621000	1543100	3242500	1378200	1717200	360188	1547500	1434200	1481100	2065600	1893000	1402300	3946600	1578500	747486	1969100	1202000	580933	1994300	1520800	1347100	1327000	344674	1503800	415610	921760	1834600	325998	448316
B1AU74	B1AU74;Q9CWP6-2;Q9CWP6-3;Q9CWP6	Motile sperm domain-containing protein 2	Mospd2	tr|B1AU74|B1AU74_MOUSE Motile sperm domain-containing protein 2 OS=Mus musculus OX=10090 GN=Mospd2 PE=1 SV=1;sp|Q9CWP6-2|MSPD2_MOUSE Isoform 2 of Motile sperm domain-containing protein 2 OS=Mus musculus OX=10090 GN=Mospd2;sp|Q9CWP6-3|MSPD2_MOUSE Isoform 3	1	490483	430182	396905	356080	346898	499532	560352	319865	360188	350936	336680	361612	400566	376107	409718	389028	342233	747486	312879	746728	580933	385656	323890	478808	466503	344674	451250	415610	620123	330431	325998	448316
B1AUN3	B1AUN3;Q3UKV0;B1AUN2	carboxypeptidase B1 (Tissue)	Eif2b3	tr|B1AUN3|B1AUN3_MOUSE Eukaryotic translation initiation factor 2B, subunit 3 OS=Mus musculus OX=10090 GN=Eif2b3 PE=1 SV=1;tr|Q3UKV0|Q3UKV0_MOUSE Eukaryotic translation initiation factor 2B, subunit 3 OS=Mus musculus OX=10090 GN=Eif2b3 PE=1 SV=1;tr|B1AUN2|	3	490483	1747000	1767800	356080	1279600	499532	1880200	319865	360188	350936	1675600	361612	400566	1397900	409718	389028	342233	3572600	312879	3608100	580933	1903700	2385800	1670400	2529700	1542600	451250	1927200	2760700	1227300	325998	1607000
B1AUX2	B1AUX2;Q61191	Host cell factor 1;HCF N-terminal chain 1;HCF N-terminal chain 2;HCF N-terminal chain 3;HCF N-terminal chain 4;HCF N-terminal chain 5;HCF N-terminal chain 6;HCF C-terminal chain 1;HCF C-terminal chain 2;HCF C-terminal chain 3;HCF C-terminal chain 4;HCF C-terminal chain 5;HCF C-terminal chain 6	Hcfc1	tr|B1AUX2|B1AUX2_MOUSE Host cell factor 1 OS=Mus musculus OX=10090 GN=Hcfc1 PE=1 SV=1;sp|Q61191|HCFC1_MOUSE Host cell factor 1 OS=Mus musculus OX=10090 GN=Hcfc1 PE=1 SV=2	1	490483	430182	396905	356080	346898	499532	963700	319865	360188	350936	336680	361612	400566	376107	409718	389028	342233	747486	312879	2308000	580933	385656	323890	478808	466503	344674	451250	415610	1734900	330431	325998	448316
B1AWT2	B1AWT2;B1AWT3;Q7TT45;B1AWT4;Q99K70;Q99K70-2	Ras-related GTP-binding protein D;Ras-related GTP-binding protein C	Rragd;Rragc	tr|B1AWT2|B1AWT2_MOUSE Ras-related GTP-binding protein OS=Mus musculus OX=10090 GN=Rragd PE=1 SV=1;tr|B1AWT3|B1AWT3_MOUSE Ras-related GTP-binding protein OS=Mus musculus OX=10090 GN=Rragd PE=1 SV=1;sp|Q7TT45|RRAGD_MOUSE Ras-related GTP-binding protein D OS	4	8148100	7978000	7480400	7442300	11442000	6896800	7669300	5494100	5745000	350936	5759800	9040700	9001700	6593500	11760000	9964800	342233	7746300	10005000	6702900	580933	8360600	12196000	8179100	7466400	344674	4783700	415610	9446700	9686300	7141900	7536900
B1B1D8	B1B1D8;Q9D773	39S ribosomal protein L2, mitochondrial	Mrpl2	tr|B1B1D8|B1B1D8_MOUSE 39S ribosomal protein L2, mitochondrial OS=Mus musculus OX=10090 GN=Mrpl2 PE=1 SV=1;sp|Q9D773|RM02_MOUSE 39S ribosomal protein L2, mitochondrial OS=Mus musculus OX=10090 GN=Mrpl2 PE=1 SV=1	2	10492000	430182	396905	356080	346898	10596000	560352	7989200	10545000	350936	7956300	361612	8956900	376107	8081300	389028	342233	7305400	7227000	6984600	580933	7224000	323890	478808	8751800	344674	11658000	415610	620123	330431	8666700	12235000
B2KGR2	B2KGR2;O89112	LanC-like protein 1	Lancl1	tr|B2KGR2|B2KGR2_MOUSE Glutathione S-transferase LANCL1 (Fragment) OS=Mus musculus OX=10090 GN=Lancl1 PE=1 SV=1;sp|O89112|LANC1_MOUSE Glutathione S-transferase LANCL1 OS=Mus musculus OX=10090 GN=Lancl1 PE=1 SV=1	3	11367000	7535500	396905	356080	7014600	499532	7792600	5491700	8867300	4402100	6663700	361612	400566	6896700	6608500	8227300	7779600	8549000	5467800	6546900	14550000	7105300	7609000	13611000	11808000	13647000	451250	10886000	14963000	6615600	8778600	5181600
B2RPU8	B2RPU8;D3Z5B1;Q9D1L0	Coiled-coil-helix-coiled-coil-helix domain-containing protein 2	Zbed5;Chchd2	tr|B2RPU8|B2RPU8_MOUSE SCAN domain containing 3 OS=Mus musculus OX=10090 GN=Zbed5 PE=1 SV=1;tr|D3Z5B1|D3Z5B1_MOUSE Zinc finger, BED type-containing 5 (Fragment) OS=Mus musculus OX=10090 GN=Zbed5 PE=4 SV=8;sp|Q9D1L0|CHCH2_MOUSE Coiled-coil-helix-coiled-coil	1	59161000	61562000	67311000	55112000	81728000	51470000	58540000	73239000	61184000	42996000	66000000	48589000	53328000	50629000	66511000	56443000	65113000	36698000	60169000	44500000	43465000	74870000	50235000	52783000	42134000	23347000	48643000	36043000	36211000	48273000	58552000	76874000
B2RS76	B2RS76	carboxypeptidase B1 (Tissue)	Cpb1	tr|B2RS76|B2RS76_MOUSE carboxypeptidase B1 (Tissue) OS=Mus musculus OX=10090 GN=Cpb1 PE=1 SV=1	16	109650000	430182	396905	6092000	795260	25044000	560352	7963400	2671300	10761000	336680	361612	8212100	30146000	409718	389028	342233	747486	312879	746728	580933	385656	323890	1492000	466503	2343200	451250	415610	620123	330431	325998	448316
B2RXS4	B2RXS4	Plexin-B2	Plxnb2	sp|B2RXS4|PLXB2_MOUSE Plexin-B2 OS=Mus musculus OX=10090 GN=Plxnb2 PE=1 SV=1	5	14582000	14663000	7113000	3551400	12018000	499532	11555000	6571300	11041000	350936	8696600	361612	6396600	376107	7104100	389028	7216400	747486	312879	24001000	6573700	385656	323890	9983100	9149400	344674	9525300	9189500	14005000	330431	4104600	448316
B7ZC18	B7ZC18;P42227-2;P42227-3;P42227	Signal transducer and activator of transcription;Signal transducer and activator of transcription 3	Stat3	tr|B7ZC18|B7ZC18_MOUSE Signal transducer and activator of transcription OS=Mus musculus OX=10090 GN=Stat3 PE=1 SV=1;sp|P42227-2|STAT3_MOUSE Isoform Stat3B of Signal transducer and activator of transcription 3 OS=Mus musculus OX=10090 GN=Stat3;sp|P42227-3|S	7	490483	430182	396905	356080	346898	499532	560352	319865	360188	350936	336680	361612	400566	376107	409718	389028	342233	12185000	312879	15482000	580933	385656	323890	478808	466503	344674	451250	415610	11227000	330431	325998	448316
B7ZCL8	B7ZCL8;A2AN84;P70290;D6RFD5;B7ZCM1;B7ZCM0;B7ZCL9	55 kDa erythrocyte membrane protein	Mpp1	tr|B7ZCL8|B7ZCL8_MOUSE 55 kDa erythrocyte membrane protein OS=Mus musculus OX=10090 GN=Mpp1 PE=1 SV=1;tr|A2AN84|A2AN84_MOUSE 55 kDa erythrocyte membrane protein OS=Mus musculus OX=10090 GN=Mpp1 PE=1 SV=1;sp|P70290|EM55_MOUSE 55 kDa erythrocyte membrane pro	2	9703500	430182	8685000	7439200	346898	8605400	560352	8317600	360188	8761200	5577800	361612	9521500	9386800	16573000	389028	342233	9119200	8206000	7629000	580933	6591600	323890	478808	12562000	9582700	451250	415610	11340000	330431	8133200	448316
B7ZCU2	B7ZCU2;B7ZCU5;B7ZCU4;B7ZCU3;B7ZCU0;J3QNK8;Q8CBW3-5;Q8CBW3-2;Q8CBW3-4;Q8CBW3-3;Q8CBW3	Abl interactor 1	Abi1	tr|B7ZCU2|B7ZCU2_MOUSE Abl interactor 1 OS=Mus musculus OX=10090 GN=Abi1 PE=1 SV=1;tr|B7ZCU5|B7ZCU5_MOUSE Abl interactor 1 OS=Mus musculus OX=10090 GN=Abi1 PE=1 SV=1;tr|B7ZCU4|B7ZCU4_MOUSE Abl interactor 1 OS=Mus musculus OX=10090 GN=Abi1 PE=1 SV=1;tr|B7ZC	1	3156600	3439600	4556000	4012500	3461900	3685700	895510	2996500	3769100	3942000	4025900	4447900	3374400	3656000	3481700	5153300	3435000	747486	4419300	746728	4037000	4670500	323890	3601900	4032200	4372100	3655400	3325900	620123	3396500	4732100	4168700
B8JI96	B8JI96	Major urinary protein 14	Mup14	tr|B8JI96|B8JI96_MOUSE Major urinary protein 14 (Fragment) OS=Mus musculus OX=10090 GN=Mup14 PE=1 SV=1	2	490483	430182	396905	356080	15689000	499532	560352	319865	360188	350936	336680	361612	6204300	376107	409718	389028	342233	747486	9862600	8404800	17961000	12578000	18224000	23886000	32150000	344674	18297000	53844000	12212000	14604000	325998	14479000
B9EJ54	B9EJ54;A0A0J9YUD5;E9Q880	Nucleoporin 205	Nup205	tr|B9EJ54|B9EJ54_MOUSE Nucleoporin 205 OS=Mus musculus OX=10090 GN=Nup205 PE=1 SV=1;tr|A0A0J9YUD5|A0A0J9YUD5_MOUSE Nucleoporin 205 OS=Mus musculus OX=10090 GN=Nup205 PE=1 SV=1	3	490483	430182	396905	356080	346898	499532	560352	319865	360188	350936	336680	361612	400566	376107	409718	389028	342233	1475400	312879	1424600	580933	385656	323890	478808	466503	344674	451250	415610	1423800	330431	325998	448316
D3YTL5	D3YTL5;Q99LB4;P24452;D3YZN3;D3YU77;D3Z014;D3Z4K5	Macrophage-capping protein	Capg	tr|D3YTL5|D3YTL5_MOUSE Macrophage-capping protein (Fragment) OS=Mus musculus OX=10090 GN=Capg PE=1 SV=1;tr|Q99LB4|Q99LB4_MOUSE Capping protein (Actin filament), gelsolin-like OS=Mus musculus OX=10090 GN=Capg PE=1 SV=1;sp|P24452|CAPG_MOUSE Macrophage-cappin	3	16546000	430182	12381000	10077000	346898	11657000	560352	6786200	5339800	8186500	9099900	9278100	400566	11147000	409718	389028	342233	747486	312879	746728	580933	7121000	323890	478808	10107000	12768000	451250	415610	620123	330431	325998	448316
D3YU17	D3YU17;Q8VCM8	Nicalin	Ncln	tr|D3YU17|D3YU17_MOUSE Nicalin OS=Mus musculus OX=10090 GN=Ncln PE=1 SV=1;sp|Q8VCM8|NCLN_MOUSE Nicalin OS=Mus musculus OX=10090 GN=Ncln PE=1 SV=2	4	490483	430182	396905	356080	346898	499532	229790	319865	360188	350936	336680	361612	400566	549290	409718	389028	342233	5192600	608730	4342400	580933	385656	323890	478808	1170300	344674	451250	188410	18250000	330431	325998	448316
D3YU40	D3YU40;P47877	Insulin-like growth factor-binding protein 2	Igfbp2	tr|D3YU40|D3YU40_MOUSE Insulin-like growth factor-binding protein 2 OS=Mus musculus OX=10090 GN=Igfbp2 PE=1 SV=1;sp|P47877|IBP2_MOUSE Insulin-like growth factor-binding protein 2 OS=Mus musculus OX=10090 GN=Igfbp2 PE=2 SV=2	1	10135000	430182	396905	356080	346898	499532	560352	319865	360188	10324000	336680	361612	400566	376107	409718	389028	342233	747486	312879	746728	580933	385656	323890	478808	10685000	26888000	451250	13011000	620123	10832000	325998	448316
D3YU80	D3YU80;K4DI65;P60824	Cold-inducible RNA-binding protein	Cirbp	tr|D3YU80|D3YU80_MOUSE Cold-inducible RNA-binding protein (Fragment) OS=Mus musculus OX=10090 GN=Cirbp PE=1 SV=1;tr|K4DI65|K4DI65_MOUSE Cold-inducible RNA-binding protein OS=Mus musculus OX=10090 GN=Cirbp PE=1 SV=1;sp|P60824|CIRBP_MOUSE Cold-inducible RNA-	2	490483	430182	5886500	356080	6165200	499532	560352	319865	6288000	4386700	6882500	8715100	6064500	376107	5608100	389028	6403800	6461000	7239500	4525200	580933	5393500	7565300	7181400	7857100	10904000	6964500	415610	6909000	6032100	325998	5191200
D3YUC9	D3YUC9;A0A0R4J139	L-methionine (R)-S-oxide reductase	Msrb3	tr|D3YUC9|D3YUC9_MOUSE L-methionine (R)-S-oxide reductase OS=Mus musculus OX=10090 GN=Msrb3 PE=1 SV=1;tr|A0A0R4J139|A0A0R4J139_MOUSE Peptide-methionine (R)-S-oxide reductase OS=Mus musculus OX=10090 GN=Msrb3 PE=1 SV=1	1	490483	430182	3744500	356080	3015900	8124400	560352	4766600	4933100	4489500	5501700	361612	6240900	5959800	4682500	6570500	3281100	747486	312879	746728	580933	385656	5420400	4941900	466503	5803900	3708200	415610	5774400	6965100	325998	4649700
D3YUD8	D3YUD8;A0A0A6YVU8;Q9JKV1	Proteasomal ubiquitin receptor ADRM1	Gm9774;Adrm1	tr|D3YUD8|D3YUD8_MOUSE Predicted pseudogene 9774 OS=Mus musculus OX=10090 GN=Gm9774 PE=3 SV=3;tr|A0A0A6YVU8|A0A0A6YVU8_MOUSE Predicted pseudogene 9774 OS=Mus musculus OX=10090 GN=Gm9774 PE=3 SV=1;sp|Q9JKV1|ADRM1_MOUSE Proteasomal ubiquitin receptor ADRM1 O	2	3482700	5275900	5605100	4430700	6214400	499532	9061900	5452000	6189700	7003900	5381200	8091600	4964200	6324300	5914100	8057500	4208500	13815000	5356600	12875000	580933	385656	7421800	6042000	6775800	6319000	7636800	4619300	15336000	12004000	6135300	4577100
D3YUW7	D3YUW7;E9QMC1;A0A5F8MPT6;P59242-2;P59242	Cingulin	Cgn	tr|D3YUW7|D3YUW7_MOUSE Cingulin OS=Mus musculus OX=10090 GN=Cgn PE=1 SV=2;tr|E9QMC1|E9QMC1_MOUSE Cingulin OS=Mus musculus OX=10090 GN=Cgn PE=1 SV=2;tr|A0A5F8MPT6|A0A5F8MPT6_MOUSE Cingulin OS=Mus musculus OX=10090 GN=Cgn PE=1 SV=1;sp|P59242-2|CING_MOUSE Iso	4	490483	430182	3965400	2707700	6713100	3413500	560352	3328500	2794700	3642500	336680	3639600	5706100	376107	3670900	389028	3262200	2668600	4079000	2659600	580933	3275200	3363400	2160600	8157900	344674	2523800	3860600	620123	330431	3476500	448316
D3YWI4	D3YWI4;E9Q1I6;F8WHT5;G3UVW1;P19258	Protein Mpv17	Mpv17	tr|D3YWI4|D3YWI4_MOUSE Protein Mpv17 OS=Mus musculus OX=10090 GN=Mpv17 PE=1 SV=1;tr|E9Q1I6|E9Q1I6_MOUSE Protein Mpv17 OS=Mus musculus OX=10090 GN=Mpv17 PE=1 SV=1;tr|F8WHT5|F8WHT5_MOUSE Protein Mpv17 OS=Mus musculus OX=10090 GN=Mpv17 PE=1 SV=1;tr|G3UVW1|G3U	1	490483	430182	396905	356080	346898	499532	560352	319865	360188	350936	336680	361612	400566	376107	409718	389028	342233	21067000	312879	16496000	580933	385656	323890	478808	466503	344674	451250	415610	13023000	330431	325998	448316
D3YX62	D3YX62;O70252;D3Z4A2;D3YXN4	Heme oxygenase 2	Hmox2	tr|D3YX62|D3YX62_MOUSE Heme oxygenase (biliverdin-producing) (Fragment) OS=Mus musculus OX=10090 GN=Hmox2 PE=1 SV=1;sp|O70252|HMOX2_MOUSE Heme oxygenase 2 OS=Mus musculus OX=10090 GN=Hmox2 PE=1 SV=1	3	7705000	6863800	9203500	356080	8825700	11252000	7729900	319865	6919800	350936	6831600	8894000	400566	376107	8797400	389028	9123500	10544000	7860200	746728	580933	385656	11103000	478808	12529000	11747000	10872000	415610	620123	19284000	325998	6983600
D3YXQ7	D3YXQ7;A0A0R4J098;O88291-2;O88291	DBIRD complex subunit ZNF326	Zfp326;Znf326	tr|D3YXQ7|D3YXQ7_MOUSE Zinc finger protein 326 (Fragment) OS=Mus musculus OX=10090 GN=Zfp326 PE=1 SV=1;tr|A0A0R4J098|A0A0R4J098_MOUSE Zinc finger protein 326 OS=Mus musculus OX=10090 GN=Zfp326 PE=1 SV=1;sp|O88291-2|ZN326_MOUSE Isoform 2 of DBIRD complex su	1	160800	134310	196800	356080	346898	174350	231670	319865	182430	255660	301520	147930	400566	169370	119450	152650	115400	608420	109400	365280	580933	385656	323890	478808	240130	142680	142130	259930	253350	258220	222570	448316
D3YXZ5	D3YXZ5;Q91WT8;Q91WT8-2;D3Z113	RNA-binding protein 47	Rbm47	tr|D3YXZ5|D3YXZ5_MOUSE RNA-binding motif protein 47 OS=Mus musculus OX=10090 GN=Rbm47 PE=1 SV=1;sp|Q91WT8|RBM47_MOUSE RNA-binding protein 47 OS=Mus musculus OX=10090 GN=Rbm47 PE=1 SV=1;sp|Q91WT8-2|RBM47_MOUSE Isoform 2 of RNA-binding protein 47 OS=Mus musc	4	490483	3239100	396905	356080	346898	4023600	4011500	319865	360188	350936	336680	361612	400566	2409100	409718	389028	342233	14284000	312879	22496000	580933	385656	4727100	3834400	5801600	344674	5752500	3554100	19799000	4653600	3703700	448316
D3YY73	D3YY73;D3Z2N9;E9Q317;O55128	Histone deacetylase complex subunit SAP18	Sap18;Gm10094	tr|D3YY73|D3YY73_MOUSE Histone deacetylase complex subunit SAP18 OS=Mus musculus OX=10090 GN=Sap18 PE=1 SV=1;tr|D3Z2N9|D3Z2N9_MOUSE Histone deacetylase complex subunit SAP18 OS=Mus musculus OX=10090 GN=Sap18 PE=1 SV=1;tr|E9Q317|E9Q317_MOUSE 18 kDa Sin3-ass	1	490483	5776200	4580200	356080	8045300	499532	4005300	6734000	360188	350936	5108100	6287400	400566	4156100	4769300	9850800	6841500	747486	312879	746728	6403200	6271100	323890	478808	6055500	344674	451250	6801800	620123	10085000	325998	4988700
D3YYT1	D3YYT1;Q922P9	Putative oxidoreductase GLYR1	Glyr1	tr|D3YYT1|D3YYT1_MOUSE Glyoxylate reductase 1 homolog OS=Mus musculus OX=10090 GN=Glyr1 PE=1 SV=1;sp|Q922P9|GLYR1_MOUSE Putative oxidoreductase GLYR1 OS=Mus musculus OX=10090 GN=Glyr1 PE=1 SV=1	3	5658600	8897600	10799000	356080	346898	499532	8966300	9636000	360188	350936	336680	361612	10410000	376107	409718	389028	9849800	747486	312879	746728	12091000	10425000	323890	12266000	466503	344674	451250	415610	620123	330431	325998	12398000
D3YYW8	D3YYW8;Q91V81	RNA-binding protein 42	Rbm42	tr|D3YYW8|D3YYW8_MOUSE RNA-binding motif protein 42 OS=Mus musculus OX=10090 GN=Rbm42 PE=1 SV=1;sp|Q91V81|RBM42_MOUSE RNA-binding protein 42 OS=Mus musculus OX=10090 GN=Rbm42 PE=1 SV=2	1	490483	430182	396905	356080	346898	499532	560352	319865	360188	350936	336680	361612	400566	376107	409718	389028	342233	747486	312879	746728	580933	385656	323890	478808	466503	344674	451250	415610	620123	330431	325998	448316
D3YYX0	D3YYX0;D3Z2J6;Q9D710	Thioredoxin-related transmembrane protein 2	Tmx2	tr|D3YYX0|D3YYX0_MOUSE Thioredoxin-related transmembrane protein 2 (Fragment) OS=Mus musculus OX=10090 GN=Tmx2 PE=1 SV=1;tr|D3Z2J6|D3Z2J6_MOUSE Thioredoxin-related transmembrane protein 2 OS=Mus musculus OX=10090 GN=Tmx2 PE=1 SV=1;sp|Q9D710|TMX2_MOUSE Thio	1	490483	1723400	1710800	1527400	346898	499532	1771500	319865	360188	350936	336680	361612	1103800	376107	409718	389028	1564800	5101400	1802200	4646900	580933	385656	2770600	478808	466503	344674	451250	415610	4697800	2361900	325998	2020500
D3YZJ1	D3YZJ1;Q64337-2;Q64337	Sequestosome-1	Sqstm1	tr|D3YZJ1|D3YZJ1_MOUSE Sequestosome-1 OS=Mus musculus OX=10090 GN=Sqstm1 PE=1 SV=1;sp|Q64337-2|SQSTM_MOUSE Isoform 2 of Sequestosome-1 OS=Mus musculus OX=10090 GN=Sqstm1;sp|Q64337|SQSTM_MOUSE Sequestosome-1 OS=Mus musculus OX=10090 GN=Sqstm1 PE=1 SV=1	1	490483	430182	396905	356080	346898	499532	3803200	319865	3670600	350936	336680	361612	400566	376107	409718	389028	342233	747486	312879	7302800	580933	385656	323890	478808	466503	344674	451250	415610	5144100	330431	325998	448316
D3YZN4	D3YZN4;D3YXB7;Q3ULF4	Paraplegin	Spg7	tr|D3YZN4|D3YZN4_MOUSE Paraplegin OS=Mus musculus OX=10090 GN=Spg7 PE=1 SV=1;tr|D3YXB7|D3YXB7_MOUSE Paraplegin OS=Mus musculus OX=10090 GN=Spg7 PE=1 SV=2;sp|Q3ULF4|SPG7_MOUSE Paraplegin OS=Mus musculus OX=10090 GN=Spg7 PE=1 SV=1	1	490483	430182	396905	356080	346898	499532	560352	319865	360188	350936	336680	361612	400566	376107	409718	389028	342233	2230400	312879	1496500	580933	385656	323890	478808	466503	344674	451250	415610	1780000	330431	325998	448316
D3YZS0	D3YZS0;Q9CQY2	RNMT-activating mini protein	Fam103a1	tr|D3YZS0|D3YZS0_MOUSE RNA guanine-N7 methyltransferase-activating subunit (Fragment) OS=Mus musculus OX=10090 GN=Ramac PE=1 SV=1;sp|Q9CQY2|RAMAC_MOUSE RNA guanine-N7 methyltransferase activating subunit OS=Mus musculus OX=10090 GN=Ramac PE=3 SV=1	1	490483	3496200	396905	356080	2856600	499532	560352	319865	360188	350936	336680	361612	400566	376107	2541500	3631500	2551100	747486	312879	746728	580933	385656	323890	3293700	466503	344674	4401300	415610	620123	330431	325998	448316
D3Z061	D3Z061;Q8C7R4	Ubiquitin-like modifier-activating enzyme 6	Uba6	tr|D3Z061|D3Z061_MOUSE E1 ubiquitin-activating enzyme OS=Mus musculus OX=10090 GN=Uba6 PE=1 SV=1;sp|Q8C7R4|UBA6_MOUSE Ubiquitin-like modifier-activating enzyme 6 OS=Mus musculus OX=10090 GN=Uba6 PE=1 SV=1	3	490483	430182	396905	356080	346898	499532	3674100	319865	360188	350936	336680	361612	400566	3890100	409718	389028	10012000	13814000	312879	10092000	5214500	6474800	4040500	4945200	3307400	344674	451250	415610	9452300	5135100	325998	448316
D3Z0F5	D3Z0F5;O88545	COP9 signalosome complex subunit 6	Cops6	tr|D3Z0F5|D3Z0F5_MOUSE COP9 signalosome complex subunit 6 OS=Mus musculus OX=10090 GN=Cops6 PE=1 SV=1;sp|O88545|CSN6_MOUSE COP9 signalosome complex subunit 6 OS=Mus musculus OX=10090 GN=Cops6 PE=1 SV=1	2	490483	430182	396905	356080	346898	499532	560352	319865	5870900	350936	336680	361612	400566	376107	409718	389028	342233	10919000	312879	8361200	580933	385656	323890	478808	466503	344674	451250	415610	11643000	330431	6547400	9516900
D3Z0H7	D3Z0H7;G3X8P6;Q99MD6	Thioredoxin reductase 3	Txnrd3	tr|D3Z0H7|D3Z0H7_MOUSE Thioredoxin reductase 3 OS=Mus musculus OX=10090 GN=Txnrd3 PE=1 SV=2;tr|G3X8P6|G3X8P6_MOUSE Thioredoxin-disulfide reductase OS=Mus musculus OX=10090 GN=Txnrd3 PE=1 SV=1;sp|Q99MD6|TRXR3_MOUSE Thioredoxin reductase 3 OS=Mus musculus OX	2	8772200	11017000	9375700	356080	346898	499532	560352	6948500	7453700	350936	8734400	12520000	400566	7772700	409718	11926000	7463500	747486	6549700	746728	9337400	11274000	323890	478808	466503	6080400	9633400	415610	6712200	7739200	325998	448316
D3Z0U5	D3Z0U5;D6RGM7;D3Z4J2;A0A0G2JFY0;A0A0A0MQ80;Q9D3R6-3;Q9D3R6;Q3UMC0	Katanin p60 ATPase-containing subunit A-like 2;Spermatogenesis-associated protein 5	Katnal2;Spata5	tr|D3Z0U5|D3Z0U5_MOUSE Katanin p60 ATPase-containing subunit A-like 2 OS=Mus musculus OX=10090 GN=Katnal2 PE=4 SV=1;tr|D6RGM7|D6RGM7_MOUSE Katanin p60 ATPase-containing subunit A-like 2 OS=Mus musculus OX=10090 GN=Katnal2 PE=1 SV=1;tr|D3Z4J2|D3Z4J2_MOUSE K	1	422420000	417950000	395940000	370810000	386580000	408310000	378520000	521340000	402700000	441990000	403300000	432740000	388440000	399930000	372100000	287430000	550760000	271630000	403510000	335380000	649310000	523280000	377870000	558700000	361610000	416560000	357890000	424340000	316700000	379800000	531210000	491230000
D3Z139	D3Z139;Q8K0G8	Epithelial splicing regulatory protein 2	Esrp2	tr|D3Z139|D3Z139_MOUSE Epithelial splicing regulatory protein 2 (Fragment) OS=Mus musculus OX=10090 GN=Esrp2 PE=1 SV=1;sp|Q8K0G8|ESRP2_MOUSE Epithelial splicing regulatory protein 2 OS=Mus musculus OX=10090 GN=Esrp2 PE=1 SV=1	2	490483	430182	396905	356080	346898	499532	560352	319865	360188	350936	336680	361612	400566	376107	409718	389028	342233	1496300	312879	746728	580933	385656	323890	478808	466503	344674	451250	415610	1772200	330431	325998	448316
D3Z151	D3Z151;Q99LC8;A0A0G2JEF1;D3YZ05	Translation initiation factor eIF-2B subunit alpha	Eif2b1	tr|D3Z151|D3Z151_MOUSE Translation initiation factor eIF-2B subunit alpha (Fragment) OS=Mus musculus OX=10090 GN=Eif2b1 PE=1 SV=8;sp|Q99LC8|EI2BA_MOUSE Translation initiation factor eIF-2B subunit alpha OS=Mus musculus OX=10090 GN=Eif2b1 PE=1 SV=1	3	490483	430182	396905	356080	346898	499532	1532900	319865	360188	350936	336680	361612	400566	376107	409718	389028	342233	2433000	312879	2195200	580933	385656	323890	478808	466503	344674	451250	415610	2173700	330431	325998	448316
D3Z158	D3Z158;Q8BML9;A0A140LHZ5;A0A0A6YY08;A0A140LIN2;A0A140LIS6;A0A140LJH1;A0A140LHJ3;A0A140LJK5;A0A140LHB3;A0A140LHC3;A0A140LII8;A0A140LIZ4;A0A140LJH2;A0A140LID3;F6TDS3	glutamine--tRNA ligase	Qars	tr|D3Z158|D3Z158_MOUSE Glutaminyl-tRNA synthetase OS=Mus musculus OX=10090 GN=Qars PE=1 SV=2;sp|Q8BML9|SYQ_MOUSE Glutamine--tRNA ligase OS=Mus musculus OX=10090 GN=Qars1 PE=1 SV=1	10	490483	2093700	1918200	4254200	4006700	3895600	2916600	1230200	4529800	1199800	336680	896590	4544300	3957500	409718	4417300	342233	73350000	907000	63012000	580933	1106200	621050	3661700	1199500	3828600	1301500	1159100	34427000	967220	1059600	1120100
D3Z2C4	D3Z2C4	pyruvate kinase	Pklr	tr|D3Z2C4|D3Z2C4_MOUSE Pyruvate kinase (Fragment) OS=Mus musculus OX=10090 GN=Pklr PE=1 SV=1	1	44005000	67306000	47109000	60244000	38895000	33883000	37963000	41640000	51613000	49526000	45182000	57306000	33797000	46918000	41864000	48476000	59521000	29795000	56560000	34819000	61484000	43042000	42120000	49473000	24744000	28246000	48083000	36668000	29812000	51159000	48722000	52293000
D3Z2K2	D3Z2K2;Q9CR88	28S ribosomal protein S14, mitochondrial	Mrps14	tr|D3Z2K2|D3Z2K2_MOUSE 28S ribosomal protein S14, mitochondrial OS=Mus musculus OX=10090 GN=Mrps14 PE=1 SV=1;sp|Q9CR88|RT14_MOUSE 28S ribosomal protein S14, mitochondrial OS=Mus musculus OX=10090 GN=Mrps14 PE=1 SV=1	1	490483	430182	396905	356080	346898	499532	560352	319865	360188	350936	336680	361612	400566	376107	409718	389028	342233	10989000	312879	9965500	580933	385656	323890	478808	466503	344674	451250	415610	13358000	330431	325998	448316
D3Z2V8	D3Z2V8;D6RH68;A0A338P6X6;Q99K56;A0A338P7G4;Q8BTN3;P54797	Transport and Golgi organization 2 homolog	Tango2	tr|D3Z2V8|D3Z2V8_MOUSE Transport and Golgi organization 2 homolog (Fragment) OS=Mus musculus OX=10090 GN=Tango2 PE=1 SV=8;tr|D6RH68|D6RH68_MOUSE Transport and Golgi organization 2 homolog (Fragment) OS=Mus musculus OX=10090 GN=Tango2 PE=1 SV=2;tr|A0A338P6X	1	10633000	10187000	11301000	11823000	10014000	9154800	9931300	15563000	11015000	10273000	12411000	8666900	11390000	14003000	8770800	10200000	14327000	8303700	10867000	7781000	13238000	10052000	9866600	10775000	10414000	10943000	10934000	10217000	10293000	9759300	12653000	13435000
D3Z2Z1	D3Z2Z1;F8WIA1;Q922J3;Q922J3-2;Q8C0S5;D3Z3M7;F6RCU2	CAP-Gly domain-containing linker protein 1	Clip1	tr|D3Z2Z1|D3Z2Z1_MOUSE CAP-Gly domain-containing linker protein 1 OS=Mus musculus OX=10090 GN=Clip1 PE=1 SV=1;tr|F8WIA1|F8WIA1_MOUSE CAP-Gly domain-containing linker protein 1 OS=Mus musculus OX=10090 GN=Clip1 PE=1 SV=1;sp|Q922J3|CLIP1_MOUSE CAP-Gly domain	6	490483	10096000	8695400	7148100	7257000	6678700	8246100	10175000	7710200	6344900	6765000	9765600	8544700	7105700	7541500	8510600	9034600	8707100	9400800	6891000	580933	8844900	8286400	9734200	8151200	9931500	8479000	7799000	5596700	8893300	9492600	7884200
D3Z359	D3Z359;A2AD84;Q99JT2;Q9Z2W1;Q99KH8	Serine/threonine-protein kinase 26;Serine/threonine-protein kinase 25;Serine/threonine-protein kinase 24;Serine/threonine-protein kinase 24 35 kDa subunit;Serine/threonine-protein kinase 24 12 kDa subunit	Stk25;Stk26;Stk24	tr|D3Z359|D3Z359_MOUSE Serine/threonine-protein kinase 25 (Fragment) OS=Mus musculus OX=10090 GN=Stk25 PE=1 SV=1;tr|A2AD84|A2AD84_MOUSE Serine/threonine-protein kinase 26 OS=Mus musculus OX=10090 GN=Stk26 PE=1 SV=1;sp|Q99JT2|STK26_MOUSE Serine/threonine-pr	1	1934400	3581200	2827400	2534800	2245000	1847300	2810100	2311800	2425700	2279700	2356500	2180800	2506600	2822600	2946800	2511500	342233	7078000	3132500	5566000	580933	3146900	3152300	1776800	3347800	2650600	2956500	2492500	6258000	2436600	2871200	2804300
D3Z3F1	D3Z3F1;Q9D824-4;Q9D824-3;Q9D824-2;Q9D824	Pre-mRNA 3-end-processing factor FIP1	Fip1l1	tr|D3Z3F1|D3Z3F1_MOUSE FIP1-like 1 protein (Fragment) OS=Mus musculus OX=10090 GN=Fip1l1 PE=1 SV=2;sp|Q9D824-4|FIP1_MOUSE Isoform 4 of Pre-mRNA 3-end-processing factor FIP1 OS=Mus musculus OX=10090 GN=Fip1l1;sp|Q9D824-3|FIP1_MOUSE Isoform 3 of Pre-mRNA 3	1	490483	430182	396905	356080	7196400	499532	560352	319865	360188	350936	8310900	6788300	5509100	376107	409718	389028	342233	4330000	312879	746728	580933	385656	323890	478808	466503	344674	451250	415610	620123	330431	325998	448316
D3Z3S1	D3Z3S1;Q9WUQ2;A0A0J9YU39;F6XLZ3	Prolactin regulatory element-binding protein	Preb	tr|D3Z3S1|D3Z3S1_MOUSE Prolactin regulatory element-binding protein OS=Mus musculus OX=10090 GN=Preb PE=1 SV=1;sp|Q9WUQ2|PREB_MOUSE Prolactin regulatory element-binding protein OS=Mus musculus OX=10090 GN=Preb PE=1 SV=1;tr|A0A0J9YU39|A0A0J9YU39_MOUSE Prola	6	490483	1799500	2304200	1751400	346898	499532	4549500	319865	2420500	350936	336680	361612	400566	376107	2593500	1835700	342233	13243000	312879	13958000	580933	2828700	5061800	478808	3784500	344674	451250	415610	13182000	4367500	3678100	1942900
D3Z3Z8	D3Z3Z8;D3YYI3;P60898	DNA-directed RNA polymerase subunit;DNA-directed RNA polymerase II subunit RPB9	Polr2i	tr|D3Z3Z8|D3Z3Z8_MOUSE DNA-directed RNA polymerase II subunit RPB9 (Fragment) OS=Mus musculus OX=10090 GN=Polr2i PE=1 SV=1;tr|D3YYI3|D3YYI3_MOUSE DNA-directed RNA polymerase subunit OS=Mus musculus OX=10090 GN=Polr2i PE=1 SV=1;sp|P60898|RPB9_MOUSE DNA-dire	1	12246000	11263000	14032000	10825000	10774000	14239000	11293000	14485000	10214000	8637500	11720000	13050000	12044000	8697000	12431000	10826000	342233	747486	10213000	6683800	580933	8436200	323890	11829000	11500000	12360000	13461000	13185000	620123	10029000	16516000	12803000
D3Z478	D3Z478;D3YYS7;Q9D0L8-2;Q9D0L8-3;Q9D0L8;D3Z4K1	mRNA cap guanine-N7 methyltransferase	Rnmt	tr|D3Z478|D3Z478_MOUSE mRNA (guanine-N(7)-)-methyltransferase (Fragment) OS=Mus musculus OX=10090 GN=Rnmt PE=1 SV=1;tr|D3YYS7|D3YYS7_MOUSE mRNA (guanine-N(7)-)-methyltransferase (Fragment) OS=Mus musculus OX=10090 GN=Rnmt PE=1 SV=1;sp|Q9D0L8-2|MCES_MOUSE I	2	490483	430182	2203400	356080	2099800	499532	560352	2380800	360188	350936	1755600	361612	2097400	376107	409718	389028	342233	747486	312879	746728	580933	2577300	2151200	478808	2828900	344674	2781100	415610	620123	330431	325998	2283700
D3Z4D1	D3Z4D1;O88824	Protein JTB	Jtb	tr|D3Z4D1|D3Z4D1_MOUSE Protein JTB OS=Mus musculus OX=10090 GN=Jtb PE=1 SV=1;sp|O88824|JTB_MOUSE Protein JTB OS=Mus musculus OX=10090 GN=Jtb PE=1 SV=1	1	2664500	3133700	3827100	2282300	346898	2417100	2239600	2297200	2245200	3889400	3772900	2833200	2411400	2583600	409718	3300300	2011400	2379900	1710800	1202800	580933	2338100	2483100	2729200	1839700	1639300	2521800	3370100	620123	330431	325998	3549800
D3Z4D8	D3Z4D8;Z4YJY0;Q3TCJ1	BRISC complex subunit Abro1	Fam175b	tr|D3Z4D8|D3Z4D8_MOUSE BRISC complex subunit Abraxas 2 (Fragment) OS=Mus musculus OX=10090 GN=Abraxas2 PE=1 SV=2;tr|Z4YJY0|Z4YJY0_MOUSE BRISC complex subunit Abraxas 2 OS=Mus musculus OX=10090 GN=Abraxas2 PE=1 SV=1;sp|Q3TCJ1|ABRX2_MOUSE BRISC complex subun	1	490483	430182	9840400	4719700	5715000	9949600	7752100	319865	10274000	350936	7768900	361612	400566	376107	8281100	389028	342233	5906700	312879	9379900	580933	385656	8867200	478808	466503	344674	451250	415610	620123	330431	10724000	5687000
D3Z511	D3Z511;Q91WM6	Protein eva-1 homolog A	Eva1a	tr|D3Z511|D3Z511_MOUSE Protein eva-1 homolog A (Fragment) OS=Mus musculus OX=10090 GN=Eva1a PE=1 SV=1;sp|Q91WM6|EVA1A_MOUSE Protein eva-1 homolog A OS=Mus musculus OX=10090 GN=Eva1a PE=1 SV=2	1	490483	51507000	396905	356080	44504000	71381000	51131000	57180000	360188	43388000	58979000	361612	400566	376107	39770000	46641000	52004000	747486	35928000	746728	580933	53516000	323890	56275000	46985000	344674	451250	415610	35156000	330431	61294000	49246000
D3Z5H3	D3Z5H3;Q9D8V7;D6RFV4;A0A494BAT3	Signal peptidase complex catalytic subunit SEC11C	Sec11c	tr|D3Z5H3|D3Z5H3_MOUSE Signal peptidase complex catalytic subunit SEC11 OS=Mus musculus OX=10090 GN=Sec11c PE=1 SV=2;sp|Q9D8V7|SC11C_MOUSE Signal peptidase complex catalytic subunit SEC11C OS=Mus musculus OX=10090 GN=Sec11c PE=1 SV=3	3	72330000	68719000	67009000	77470000	346898	499532	57518000	319865	66062000	350936	66164000	73249000	72587000	70511000	409718	205960000	342233	747486	312879	41052000	580933	68518000	54028000	71695000	466503	344674	451250	415610	620123	330431	325998	448316
D3Z6S1	D3Z6S1;Q8BM55;Q8BM55-3;Q8BM55-2	Transmembrane protein 214	Tmem214	tr|D3Z6S1|D3Z6S1_MOUSE Transmembrane protein 214 OS=Mus musculus OX=10090 GN=Tmem214 PE=1 SV=3;sp|Q8BM55|TM214_MOUSE Transmembrane protein 214 OS=Mus musculus OX=10090 GN=Tmem214 PE=1 SV=1	3	490483	430182	396905	356080	346898	499532	5357400	319865	360188	350936	336680	361612	400566	376107	409718	389028	342233	13574000	312879	15728000	580933	385656	12429000	478808	6075800	344674	451250	415610	14510000	330431	325998	448316
D3Z7D2	D3Z7D2;Q9Z120	tRNA (guanine-N(7)-)-methyltransferase	Mettl1	tr|D3Z7D2|D3Z7D2_MOUSE tRNA (guanine-N(7)-)-methyltransferase OS=Mus musculus OX=10090 GN=Mettl1 PE=1 SV=1;sp|Q9Z120|TRMB_MOUSE tRNA (guanine-N(7)-)-methyltransferase OS=Mus musculus OX=10090 GN=Mettl1 PE=1 SV=1	1	490483	430182	396905	356080	346898	3800100	560352	319865	360188	350936	336680	361612	400566	376107	409718	3771800	342233	747486	312879	746728	580933	385656	323890	2915400	466503	3624700	451250	3027600	620123	330431	325998	2098000
D3Z7F0	D3Z7F0;A0A6I8MX27;P16125;A0A0N4SVV8	L-lactate dehydrogenase;L-lactate dehydrogenase B chain	Ldhb	tr|D3Z7F0|D3Z7F0_MOUSE L-lactate dehydrogenase (Fragment) OS=Mus musculus OX=10090 GN=Ldhb PE=1 SV=1;tr|A0A6I8MX27|A0A6I8MX27_MOUSE L-lactate dehydrogenase OS=Mus musculus OX=10090 GN=Ldhb PE=1 SV=1;sp|P16125|LDHB_MOUSE L-lactate dehydrogenase B chain OS=M	4	7773800	430182	396905	7780400	11832000	499532	560352	319865	360188	7718300	336680	361612	49283000	6875300	409718	389028	342233	747486	312879	6752600	580933	385656	323890	478808	13650000	344674	451250	415610	6805300	330431	325998	448316
D3Z7P0	D3Z7P0;Q8K3W0-6;Q8K3W0-5;Q8K3W0;Q8K3W0-1;E9Q0U3;Q8K3W0-4	BRCA1-A complex subunit BRE	Bre	tr|D3Z7P0|D3Z7P0_MOUSE BRCA1-A complex subunit BRE OS=Mus musculus OX=10090 GN=Babam2 PE=1 SV=3;sp|Q8K3W0-6|BABA2_MOUSE Isoform 5 of BRISC and BRCA1-A complex member 2 OS=Mus musculus OX=10090 GN=Babam2;sp|Q8K3W0-5|BABA2_MOUSE Isoform 4 of BRISC and BRCA1-	2	2736200	4028300	3318100	1907700	4796600	2611300	2384700	3418900	1481800	1510900	3452900	361612	3793600	3012000	4073800	3876700	342233	5537800	3585100	6657300	580933	3734200	2172100	478808	466503	1201600	451250	4862600	5739000	1702700	325998	4899700
D6RCX5	D6RCX5;D3Z0X8;D3YW54;Q9CWE0;Q9CWE0-2	Mitochondrial fission regulator 1-like	Mtfr1l	tr|D6RCX5|D6RCX5_MOUSE Mitochondrial fission regulator 1-like OS=Mus musculus OX=10090 GN=Mtfr1l PE=1 SV=1;tr|D3Z0X8|D3Z0X8_MOUSE Mitochondrial fission regulator 1-like (Fragment) OS=Mus musculus OX=10090 GN=Mtfr1l PE=1 SV=1;tr|D3YW54|D3YW54_MOUSE Mitochon	2	6062200	7714500	8517100	9513500	9246100	14279000	10037000	10904000	11228000	9789900	336680	10934000	10194000	10764000	9686200	14877000	17868000	16926000	11238000	17123000	580933	13891000	18024000	9760100	12812000	15958000	19829000	12989000	14269000	15883000	14243000	10628000
D6RE20	D6RE20;Q8CET7;Q80TA1	Ethanolaminephosphotransferase 1	Ept1	tr|D6RE20|D6RE20_MOUSE Ethanolaminephosphotransferase 1 OS=Mus musculus OX=10090 GN=Selenoi PE=1 SV=1;tr|Q8CET7|Q8CET7_MOUSE Ethanolaminephosphotransferase 1 OS=Mus musculus OX=10090 GN=Selenoi PE=1 SV=1;sp|Q80TA1|EPT1_MOUSE Ethanolaminephosphotransferase	1	490483	430182	396905	356080	346898	499532	560352	319865	360188	350936	336680	361612	400566	376107	409718	389028	342233	8773200	312879	5819700	580933	385656	323890	478808	466503	344674	451250	415610	620123	330431	325998	448316
D6REV6	D6REV6;Q78JE5	F-box only protein 22	Fbxo22	tr|D6REV6|D6REV6_MOUSE F-box only protein 22 OS=Mus musculus OX=10090 GN=Fbxo22 PE=1 SV=1;sp|Q78JE5|FBX22_MOUSE F-box only protein 22 OS=Mus musculus OX=10090 GN=Fbxo22 PE=1 SV=2	2	490483	430182	396905	356080	346898	499532	560352	319865	360188	350936	336680	361612	400566	376107	409718	389028	342233	10668000	312879	9091300	580933	385656	4846300	478808	466503	344674	451250	415610	10687000	330431	325998	448316
D6RFU9	D6RFU9;O09117-2;O09117	Synaptophysin-like protein 1	Sypl;Sypl1	tr|D6RFU9|D6RFU9_MOUSE Synaptophysin-like protein OS=Mus musculus OX=10090 GN=Sypl PE=1 SV=1;sp|O09117-2|SYPL1_MOUSE Isoform 2 of Synaptophysin-like protein 1 OS=Mus musculus OX=10090 GN=Sypl1;sp|O09117|SYPL1_MOUSE Synaptophysin-like protein 1 OS=Mus muscu	2	490483	430182	396905	356080	346898	499532	560352	319865	360188	350936	336680	361612	400566	376107	409718	389028	342233	8024100	312879	5342800	580933	385656	323890	478808	466503	3163400	451250	415610	3667000	330431	325998	448316
E0CX43	E0CX43	Phosphorylase b kinase regulatory subunit	Phkb	tr|E0CX43|E0CX43_MOUSE Phosphorylase b kinase regulatory subunit (Fragment) OS=Mus musculus OX=10090 GN=Phkb PE=1 SV=1	2	490483	430182	396905	356080	346898	499532	560352	319865	360188	350936	336680	361612	400566	376107	409718	389028	342233	4452500	312879	5878700	580933	385656	323890	478808	466503	344674	451250	415610	4710300	330431	325998	448316
E0CXB9	E0CXB9;Q61301-2;Q61301-3;Q61301;Q8BS72	Catenin alpha-2	Ctnna2	tr|E0CXB9|E0CXB9_MOUSE Catenin alpha-2 OS=Mus musculus OX=10090 GN=Ctnna2 PE=1 SV=1;sp|Q61301-2|CTNA2_MOUSE Isoform 2 of Catenin alpha-2 OS=Mus musculus OX=10090 GN=Ctnna2;sp|Q61301-3|CTNA2_MOUSE Isoform 3 of Catenin alpha-2 OS=Mus musculus OX=10090 GN=Ctn	1	9898300	13056000	13992000	11056000	17907000	13914000	16390000	13180000	10545000	11811000	7865800	21640000	19421000	11157000	18158000	18669000	14780000	16226000	11123000	14425000	580933	12627000	22546000	10869000	17703000	19875000	18140000	10432000	17618000	21001000	11736000	9981000
E0CYX9	E0CYX9;Q3TC33;E0CYP1;Q3TC33-2	Coiled-coil domain-containing protein 127	Ccdc127	tr|E0CYX9|E0CYX9_MOUSE Coiled-coil domain-containing protein 127 (Fragment) OS=Mus musculus OX=10090 GN=Ccdc127 PE=1 SV=1;sp|Q3TC33|CC127_MOUSE Coiled-coil domain-containing protein 127 OS=Mus musculus OX=10090 GN=Ccdc127 PE=1 SV=2;tr|E0CYP1|E0CYP1_MOUSE C	2	1051000	773720	835570	680800	346898	901780	823640	622770	644240	726300	980570	630730	757170	850820	520800	951190	891440	1210800	713270	925560	580933	994540	323890	828270	1264100	1098700	754010	906440	858440	490970	837820	854830
E9PUM4	E9PUM4;A0A1L1SQ51;Q71LX4;A0A1L1SQP9;Q8CDM9;A0A1L1SRI1	Talin-2	Tln2	tr|E9PUM4|E9PUM4_MOUSE Talin-2 OS=Mus musculus OX=10090 GN=Tln2 PE=1 SV=1;tr|A0A1L1SQ51|A0A1L1SQ51_MOUSE Talin-2 OS=Mus musculus OX=10090 GN=Tln2 PE=1 SV=1;sp|Q71LX4|TLN2_MOUSE Talin-2 OS=Mus musculus OX=10090 GN=Tln2 PE=1 SV=3;tr|A0A1L1SQP9|A0A1L1SQP9_MOU	3	1036200	430182	1400300	356080	346898	499532	1514100	319865	1357100	350936	336680	1285300	400566	376107	409718	971270	342233	747486	312879	7760400	580933	385656	323890	478808	1659000	344674	1465200	415610	3703100	330431	325998	1266700
E9PVA8	E9PVA8	eIF-2-alpha kinase activator GCN1	Gcn1l1	sp|E9PVA8|GCN1_MOUSE eIF-2-alpha kinase activator GCN1 OS=Mus musculus OX=10090 GN=Gcn1 PE=1 SV=1	15	490483	8267200	8415300	4976300	8514300	499532	3212400	9712900	360188	695550	7631600	7922700	400566	8098300	409718	389028	8702900	36774000	312879	29723000	9983000	385656	1823200	9726400	466503	5694300	451250	9641100	58743000	330431	325998	8035900
E9PXC3	E9PXC3;A0A494B9A4	Cytochrome P450, family 2, subfamily c, polypeptide 69	Cyp2c69	tr|E9PXC3|E9PXC3_MOUSE Cytochrome P450, family 2, subfamily c, polypeptide 69 OS=Mus musculus OX=10090 GN=Cyp2c69 PE=1 SV=1	3	18302000	430182	10718000	21029000	35033000	11500000	49006000	20882000	18721000	31705000	14754000	24672000	13079000	12409000	34130000	29618000	342233	10656000	312879	22529000	580933	385656	323890	478808	466503	344674	451250	415610	620123	330431	325998	448316
E9PXK7	E9PXK7;D6RFQ2;Q9Z210	Peroxisomal membrane protein 11B	Pex11b	tr|E9PXK7|E9PXK7_MOUSE Peroxisomal membrane protein 11B OS=Mus musculus OX=10090 GN=Pex11b PE=1 SV=1;tr|D6RFQ2|D6RFQ2_MOUSE Predicted gene 42957 OS=Mus musculus OX=10090 GN=Gm42957 PE=1 SV=1;sp|Q9Z210|PX11B_MOUSE Peroxisomal membrane protein 11B OS=Mus mus	1	490483	430182	396905	356080	346898	499532	560352	319865	360188	5127200	336680	361612	400566	376107	409718	389028	342233	747486	312879	6957500	580933	385656	323890	478808	466503	344674	451250	415610	620123	330431	325998	448316
E9PY51	E9PY51;A0A286YCX6	Trafficking protein particle complex 8	Trappc8	tr|E9PY51|E9PY51_MOUSE Trafficking protein particle complex 8 OS=Mus musculus OX=10090 GN=Trappc8 PE=1 SV=1;tr|A0A286YCX6|A0A286YCX6_MOUSE Trafficking protein particle complex 8 OS=Mus musculus OX=10090 GN=Trappc8 PE=1 SV=2	2	490483	430182	396905	356080	346898	499532	560352	319865	360188	350936	336680	361612	400566	376107	409718	389028	342233	3407700	312879	2276700	580933	385656	323890	478808	466503	344674	451250	415610	3269700	330431	325998	448316
E9PY58	E9PY58;Q8CCN6;Q60649	Caseinolytic peptidase B protein homolog	Clpb	tr|E9PY58|E9PY58_MOUSE Caseinolytic peptidase B protein homolog OS=Mus musculus OX=10090 GN=Clpb PE=1 SV=1;tr|Q8CCN6|Q8CCN6_MOUSE Caseinolytic peptidase B protein homolog OS=Mus musculus OX=10090 GN=Clpb PE=1 SV=1;sp|Q60649|CLPB_MOUSE Caseinolytic peptidas	2	490483	430182	396905	356080	346898	499532	560352	30066000	32056000	350936	336680	361612	33216000	376107	409718	389028	342233	19019000	30827000	22590000	32875000	25131000	20629000	25244000	466503	344674	451250	415610	620123	19822000	325998	448316
E9PYI8	E9PYI8;Q9JMA1	Ubiquitin carboxyl-terminal hydrolase;Ubiquitin carboxyl-terminal hydrolase 14	Usp14	tr|E9PYI8|E9PYI8_MOUSE Ubiquitin carboxyl-terminal hydrolase OS=Mus musculus OX=10090 GN=Usp14 PE=1 SV=1;sp|Q9JMA1|UBP14_MOUSE Ubiquitin carboxyl-terminal hydrolase 14 OS=Mus musculus OX=10090 GN=Usp14 PE=1 SV=3	6	490483	7520600	8285800	6178300	8747700	5057500	9065300	7387200	8032600	6722700	6257400	8233800	6345800	8176800	4741500	6258700	5627200	34914000	7981200	44019000	580933	7508800	10255000	7391400	9910000	9038500	6265400	5760000	41902000	10765000	8966200	8479100
E9PYT3	E9PYT3;Q91YH5;A0A494BAX8;Q91YH5-2;A0A494BAU1;A0A494BAW9	Atlastin-3	Atl3	tr|E9PYT3|E9PYT3_MOUSE Atlastin-3 OS=Mus musculus OX=10090 GN=Atl3 PE=1 SV=1;sp|Q91YH5|ATLA3_MOUSE Atlastin-3 OS=Mus musculus OX=10090 GN=Atl3 PE=1 SV=1;tr|A0A494BAX8|A0A494BAX8_MOUSE Atlastin-3 (Fragment) OS=Mus musculus OX=10090 GN=Atl3 PE=1 SV=1;sp|Q91Y	11	490483	562600	551020	356080	300440	873010	1505200	468150	360188	474850	449300	306730	473220	373610	201610	1134100	342233	102880000	208450	55150000	580933	318950	391620	478808	1172400	620750	451250	415610	41086000	434960	912980	448316
E9PYX7	E9PYX7;E9Q852;E9Q9C3;Q9QZQ1-2;Q9QZQ1;D3Z7L2;D3YUD2	Afadin	Mllt4	tr|E9PYX7|E9PYX7_MOUSE Afadin OS=Mus musculus OX=10090 GN=Afdn PE=1 SV=1;tr|E9Q852|E9Q852_MOUSE Afadin OS=Mus musculus OX=10090 GN=Afdn PE=1 SV=2;tr|E9Q9C3|E9Q9C3_MOUSE Afadin OS=Mus musculus OX=10090 GN=Afdn PE=1 SV=1;sp|Q9QZQ1-2|AFAD_MOUSE Isoform 1 of A	2	13313000	11774000	396905	356080	6142200	499532	560352	8075800	7704000	350936	9122200	9193500	8971700	7081200	7137700	389028	10736000	8990000	9307600	8662400	11266000	10219000	8554200	8178300	11153000	10479000	451250	7222300	9583100	6549600	12673000	448316
E9PZ67	E9PZ67;F6QYE1;O09161	Calsequestrin;Calsequestrin-2	Casq2	tr|E9PZ67|E9PZ67_MOUSE Calsequestrin (Fragment) OS=Mus musculus OX=10090 GN=Casq2 PE=1 SV=1;tr|F6QYE1|F6QYE1_MOUSE Calsequestrin OS=Mus musculus OX=10090 GN=Casq2 PE=1 SV=1;sp|O09161|CASQ2_MOUSE Calsequestrin-2 OS=Mus musculus OX=10090 GN=Casq2 PE=1 SV=3	2	490483	430182	396905	356080	6076700	499532	560352	319865	360188	350936	336680	361612	15338000	376107	409718	389028	342233	747486	312879	746728	580933	385656	323890	478808	11169000	344674	451250	415610	620123	330431	325998	448316
E9Q007	E9Q007	Hydroxy-delta-5-steroid dehydrogenase, 3 beta- and steroid delta-isomerase 9	Gm4450	tr|E9Q007|E9Q007_MOUSE Predicted gene 4450 OS=Mus musculus OX=10090 GN=Gm4450 PE=1 SV=1	1	490483	430182	396905	356080	346898	499532	560352	319865	360188	350936	336680	361612	400566	376107	409718	389028	342233	747486	312879	746728	580933	385656	323890	478808	466503	344674	451250	4923700	7181500	330431	325998	448316
E9Q0H6	E9Q0H6;P51880	Fatty acid-binding protein, brain	Fabp7	tr|E9Q0H6|E9Q0H6_MOUSE Fatty acid-binding protein, brain OS=Mus musculus OX=10090 GN=Fabp7 PE=1 SV=1;sp|P51880|FABP7_MOUSE Fatty acid-binding protein, brain OS=Mus musculus OX=10090 GN=Fabp7 PE=1 SV=2	2	490483	9851500	9153400	8471400	8364400	499532	560352	8261500	360188	350936	336680	6871200	400566	10981000	409718	389028	342233	747486	312879	746728	580933	385656	323890	478808	466503	344674	6979400	415610	620123	330431	325998	448316
E9Q171	E9Q171;A0A087WR56;E9PW06;A0A087WPX3;Q810U3	Neurofascin	Nfasc	tr|E9Q171|E9Q171_MOUSE Neurofascin OS=Mus musculus OX=10090 GN=Nfasc PE=1 SV=1;tr|A0A087WR56|A0A087WR56_MOUSE Neurofascin (Fragment) OS=Mus musculus OX=10090 GN=Nfasc PE=1 SV=1;tr|E9PW06|E9PW06_MOUSE Neurofascin OS=Mus musculus OX=10090 GN=Nfasc PE=1 SV=1;	1	490483	430182	1815400	356080	346898	499532	2183400	319865	1272700	350936	336680	361612	400566	777330	409718	389028	1107000	747486	312879	746728	580933	2071800	323890	478808	466503	344674	451250	415610	1390600	330431	325998	1095900
E9Q175	E9Q175;E9PVU0;E9Q3L1;E9Q174;V9GXM4;V9GX76;Q64331	Unconventional myosin-VI	Myo6	tr|E9Q175|E9Q175_MOUSE Unconventional myosin-6 OS=Mus musculus OX=10090 GN=Myo6 PE=1 SV=1;tr|E9PVU0|E9PVU0_MOUSE Unconventional myosin-6 OS=Mus musculus OX=10090 GN=Myo6 PE=1 SV=1;tr|E9Q3L1|E9Q3L1_MOUSE Unconventional myosin-6 OS=Mus musculus OX=10090 GN=M	4	490483	430182	396905	356080	346898	499532	560352	319865	360188	350936	336680	361612	400566	376107	409718	389028	342233	747486	312879	746728	580933	385656	323890	478808	466503	344674	451250	415610	620123	330431	325998	448316
E9Q1P8	E9Q1P8	Interferon regulatory factor 2-binding protein 2	Irf2bp2	sp|E9Q1P8|I2BP2_MOUSE Interferon regulatory factor 2-binding protein 2 OS=Mus musculus OX=10090 GN=Irf2bp2 PE=1 SV=1	1	695340	779050	678110	631510	902730	986630	752420	644160	609450	620900	797660	686130	752380	691030	645820	746490	534710	461960	438000	431060	420650	652060	557120	606160	698590	855890	681210	765210	395320	578860	508640	570070
E9Q1Q0	E9Q1Q0;E9Q585;E9PX68	Solute carrier family 4 (anion exchanger), member 1, adaptor protein	Slc4a1ap	tr|E9Q1Q0|E9Q1Q0_MOUSE Solute carrier family 4 (anion exchanger), member 1, adaptor protein OS=Mus musculus OX=10090 GN=Slc4a1ap PE=1 SV=1;tr|E9Q585|E9Q585_MOUSE Solute carrier family 4 (anion exchanger), member 1, adaptor protein OS=Mus musculus OX=10090	1	490483	3955100	396905	356080	346898	499532	560352	319865	360188	350936	336680	361612	400566	376107	409718	389028	342233	747486	312879	746728	580933	4572900	323890	478808	466503	5106500	451250	3552800	4827900	330431	325998	448316
E9Q2G4	E9Q2G4;E9PXL1;A2RSL7	RIKEN cDNA 4931406B18 gene	4931406B18Rik	tr|E9Q2G4|E9Q2G4_MOUSE RIKEN cDNA 4931406B18 gene OS=Mus musculus OX=10090 GN=4931406B18Rik PE=4 SV=1;tr|E9PXL1|E9PXL1_MOUSE RIKEN cDNA 4931406B18 gene OS=Mus musculus OX=10090 GN=4931406B18Rik PE=4 SV=1;tr|A2RSL7|A2RSL7_MOUSE RIKEN cDNA 4931406B18 gene OS	1	490483	430182	396905	356080	346898	499532	560352	319865	360188	350936	336680	361612	400566	376107	409718	389028	8484700	747486	312879	746728	580933	385656	323890	16663000	11162000	344674	451250	16758000	620123	13421000	325998	15047000
E9Q2S9	E9Q2S9;Q9CR29-2;Q9CR29	Coiled-coil domain-containing protein 43	Ccdc43	tr|E9Q2S9|E9Q2S9_MOUSE Coiled-coil domain-containing protein 43 OS=Mus musculus OX=10090 GN=Ccdc43 PE=1 SV=1;sp|Q9CR29-2|CCD43_MOUSE Isoform 2 of Coiled-coil domain-containing protein 43 OS=Mus musculus OX=10090 GN=Ccdc43;sp|Q9CR29|CCD43_MOUSE Coiled-coil	1	490483	430182	396905	356080	5528400	5989100	560352	319865	360188	350936	336680	361612	400566	376107	409718	389028	342233	747486	312879	746728	580933	385656	9510600	7411100	466503	344674	451250	415610	620123	330431	4248500	448316
E9Q4Z2	E9Q4Z2	Acetyl-CoA carboxylase 2;Biotin carboxylase	Acacb	sp|E9Q4Z2|ACACB_MOUSE Acetyl-CoA carboxylase 2 OS=Mus musculus OX=10090 GN=Acacb PE=1 SV=1	5	490483	430182	396905	356080	346898	499532	560352	319865	360188	350936	336680	361612	400566	37254000	409718	389028	342233	17339000	312879	7157800	580933	385656	323890	478808	466503	12460000	16196000	415610	8537800	330431	2873700	448316
E9Q6C2	E9Q6C2;Q8CG14;A0A1W2P7F1;Q8CFG8	Complement C1s-A subcomponent;Complement C1s-A subcomponent heavy chain;Complement C1s-A subcomponent light chain;Complement C1s-B subcomponent;Complement C1s-B subcomponent heavy chain;Complement C1s-B subcomponent light chain	C1s1;C1sa;C1sb	tr|E9Q6C2|E9Q6C2_MOUSE Complement component 1, s subcomponent 1 OS=Mus musculus OX=10090 GN=C1s1 PE=1 SV=1;sp|Q8CG14|CS1A_MOUSE Complement C1s-A subcomponent OS=Mus musculus OX=10090 GN=C1sa PE=2 SV=2;tr|A0A1W2P7F1|A0A1W2P7F1_MOUSE Complement component 1,	2	490483	6386900	8304300	356080	7919600	499532	4389300	7725700	9045800	350936	5506400	361612	400566	376107	7836800	389028	342233	747486	312879	746728	580933	385656	323890	478808	466503	344674	451250	415610	620123	330431	325998	448316
E9Q6R7	E9Q6R7;A0A1W2P6L4;A0A1W2P8G5;A0A1W2P8A5	Utrophin	Utrn	tr|E9Q6R7|E9Q6R7_MOUSE Utrophin OS=Mus musculus OX=10090 GN=Utrn PE=1 SV=1;tr|A0A1W2P6L4|A0A1W2P6L4_MOUSE Utrophin (Fragment) OS=Mus musculus OX=10090 GN=Utrn PE=1 SV=1;tr|A0A1W2P8G5|A0A1W2P8G5_MOUSE Utrophin (Fragment) OS=Mus musculus OX=10090 GN=Utrn PE=	4	490483	430182	396905	356080	346898	499532	560352	319865	360188	350936	336680	361612	400566	376107	409718	389028	342233	4806800	312879	3397800	580933	385656	323890	478808	466503	344674	451250	415610	620123	330431	325998	448316
E9Q7G0	E9Q7G0;A0A1B0GSW3	Nuclear mitotic apparatus protein 1	Numa1	sp|E9Q7G0|NUMA1_MOUSE Nuclear mitotic apparatus protein 1 OS=Mus musculus OX=10090 GN=Numa1 PE=1 SV=1;tr|A0A1B0GSW3|A0A1B0GSW3_MOUSE Nuclear mitotic apparatus protein 1 (Fragment) OS=Mus musculus OX=10090 GN=Numa1 PE=1 SV=1	2	490483	430182	396905	356080	346898	499532	560352	319865	360188	350936	336680	361612	400566	376107	409718	389028	342233	8998700	312879	8108500	580933	385656	323890	478808	466503	344674	451250	415610	6403700	330431	325998	448316
E9Q7H6	E9Q7H6;Q3UQ84;Q3TP97;Q922A3;A0A0G2JF63;A0A0G2JGW2;A0A0G2JFT3;A0A0G2JFW1	Threonine--tRNA ligase, mitochondrial	Tars2	tr|E9Q7H6|E9Q7H6_MOUSE Threonyl-tRNA synthetase OS=Mus musculus OX=10090 GN=Tars2 PE=1 SV=1;sp|Q3UQ84|SYTM_MOUSE Threonine--tRNA ligase, mitochondrial OS=Mus musculus OX=10090 GN=Tars2 PE=1 SV=1;tr|Q3TP97|Q3TP97_MOUSE Threonine--tRNA ligase, mitochondrial	4	6345400	7588100	5940000	5432300	6752700	4893400	5735600	5490900	6751500	6469400	5423100	5839400	6161300	6107900	6503400	389028	6902900	9268200	6910100	7172200	580933	6167400	8125800	8212800	5791000	5271300	12277000	6649400	7165600	6917200	6524300	6975300
E9Q7K1	E9Q7K1;Q64520;Q64520-2;G3UYV3	Guanylate kinase	Guk1	tr|E9Q7K1|E9Q7K1_MOUSE Guanylate kinase OS=Mus musculus OX=10090 GN=Guk1 PE=1 SV=1;sp|Q64520|KGUA_MOUSE Guanylate kinase OS=Mus musculus OX=10090 GN=Guk1 PE=1 SV=2;sp|Q64520-2|KGUA_MOUSE Isoform 2 of Guanylate kinase OS=Mus musculus OX=10090 GN=Guk1;tr|G3U	2	490483	10613000	6699100	356080	9555900	5538300	5975500	7672900	9719200	9602900	336680	11440000	7704800	5075100	7767300	389028	7829900	7835800	312879	11363000	5690100	6979600	12573000	6685400	12315000	10087000	7648400	6853200	7924500	13239000	6201400	448316
E9Q7N5	E9Q7N5;Q8R2Q4-3;Q8R2Q4-2;Q8R2Q4;Q8C1C2;E0CY79	Ribosome-releasing factor 2, mitochondrial	Gfm2	tr|E9Q7N5|E9Q7N5_MOUSE Ribosome-releasing factor 2, mitochondrial OS=Mus musculus OX=10090 GN=Gfm2 PE=1 SV=1;sp|Q8R2Q4-3|RRF2M_MOUSE Isoform 3 of Ribosome-releasing factor 2, mitochondrial OS=Mus musculus OX=10090 GN=Gfm2;sp|Q8R2Q4-2|RRF2M_MOUSE Isoform 2	4	490483	430182	396905	356080	346898	499532	560352	319865	360188	350936	336680	361612	400566	376107	409718	389028	342233	10074000	312879	8024800	580933	385656	323890	478808	466503	344674	451250	415610	8476500	330431	325998	448316
E9Q7Q3	E9Q7Q3;D3Z6I8	Tropomyosin 3, gamma	Tpm3	tr|E9Q7Q3|E9Q7Q3_MOUSE Tropomyosin alpha-3 chain OS=Mus musculus OX=10090 GN=Tpm3 PE=1 SV=1;tr|D3Z6I8|D3Z6I8_MOUSE Tropomyosin alpha-3 chain OS=Mus musculus OX=10090 GN=Tpm3 PE=1 SV=1	1	10905000	9095400	11648000	13356000	25777000	12900000	9000500	15492000	12844000	350936	14312000	11863000	37683000	12337000	14977000	5184300	11210000	747486	312879	4396100	15392000	14770000	11228000	11932000	466503	344674	451250	415610	620123	330431	16011000	12833000
E9Q8B3	E9Q8B3;Q5U458	DnaJ homolog subfamily C member 11	Dnajc11	tr|E9Q8B3|E9Q8B3_MOUSE DnaJ homolog subfamily C member 11 OS=Mus musculus OX=10090 GN=Dnajc11 PE=1 SV=1;sp|Q5U458|DJC11_MOUSE DnaJ homolog subfamily C member 11 OS=Mus musculus OX=10090 GN=Dnajc11 PE=1 SV=2	1	490483	430182	396905	356080	346898	499532	3796300	319865	360188	350936	336680	361612	400566	376107	409718	389028	342233	14220000	312879	10572000	580933	385656	323890	478808	466503	344674	8979100	415610	9759000	330431	325998	448316
E9Q8P0	E9Q8P0;P19123	Troponin C, slow skeletal and cardiac muscles	Tnnc1	tr|E9Q8P0|E9Q8P0_MOUSE Troponin C, slow skeletal and cardiac muscles OS=Mus musculus OX=10090 GN=Tnnc1 PE=1 SV=1;sp|P19123|TNNC1_MOUSE Troponin C, slow skeletal and cardiac muscles OS=Mus musculus OX=10090 GN=Tnnc1 PE=1 SV=1	1	490483	430182	396905	356080	346898	499532	560352	319865	360188	350936	336680	361612	7278900	376107	409718	389028	342233	747486	312879	746728	580933	385656	323890	478808	7096300	344674	451250	415610	620123	330431	325998	448316
E9Q8R5	E9Q8R5;E9Q7A5;Q99JY4	TraB domain-containing protein	Trabd	tr|E9Q8R5|E9Q8R5_MOUSE TraB domain-containing protein OS=Mus musculus OX=10090 GN=Trabd PE=1 SV=1;tr|E9Q7A5|E9Q7A5_MOUSE TraB domain-containing protein (Fragment) OS=Mus musculus OX=10090 GN=Trabd PE=1 SV=8;sp|Q99JY4|TRABD_MOUSE TraB domain-containing prot	2	490483	430182	1937900	356080	346898	499532	560352	319865	360188	350936	336680	361612	400566	376107	409718	389028	342233	6395700	312879	3749800	580933	385656	323890	2950400	466503	344674	451250	415610	3396300	330431	325998	448316
E9Q933	E9Q933;Q8BK08	Transmembrane protein 11, mitochondrial	Tmem11	tr|E9Q933|E9Q933_MOUSE Transmembrane protein 11, mitochondrial OS=Mus musculus OX=10090 GN=Tmem11 PE=1 SV=1;sp|Q8BK08|TMM11_MOUSE Transmembrane protein 11, mitochondrial OS=Mus musculus OX=10090 GN=Tmem11 PE=1 SV=1	1	490483	430182	396905	356080	346898	499532	560352	319865	360188	350936	336680	361612	400566	376107	409718	389028	342233	9122800	312879	746728	580933	385656	323890	478808	466503	344674	451250	415610	6851900	330431	325998	448316
E9Q9H2	E9Q9H2;E9Q9H3;P54103	DnaJ homolog subfamily C member 2;DnaJ homolog subfamily C member 2, N-terminally processed	Dnajc2	tr|E9Q9H2|E9Q9H2_MOUSE DnaJ homolog subfamily C member 2 OS=Mus musculus OX=10090 GN=Dnajc2 PE=1 SV=1;tr|E9Q9H3|E9Q9H3_MOUSE DnaJ homolog subfamily C member 2 OS=Mus musculus OX=10090 GN=Dnajc2 PE=1 SV=1;sp|P54103|DNJC2_MOUSE DnaJ homolog subfamily C membe	1	737460	772150	795120	431600	506560	586430	650220	289570	519290	513120	760420	591200	328330	614800	493350	447740	487930	949940	354410	746010	580933	664380	509700	484260	614270	536770	649740	619940	512940	318260	264930	618620
E9QAT4-2	E9QAT4-2;E9QAT4;F7BPW6	Protein transport protein Sec16A	Sec16a	sp|E9QAT4-2|SC16A_MOUSE Isoform 2 of Protein transport protein Sec16A OS=Mus musculus OX=10090 GN=Sec16a;sp|E9QAT4|SC16A_MOUSE Protein transport protein Sec16A OS=Mus musculus OX=10090 GN=Sec16a PE=1 SV=1;tr|F7BPW6|F7BPW6_MOUSE Protein transport protein se	3	7923100	7548900	396905	356080	346898	6631100	7274800	319865	360188	7428000	336680	361612	400566	6343000	409718	389028	342233	6910400	8171800	7092100	580933	385656	6542400	7771000	466503	6971300	6770900	415610	9328500	330431	325998	7285500
E9QB02	E9QB02;Q68FL6	Methionine--tRNA ligase, cytoplasmic	Mars	tr|E9QB02|E9QB02_MOUSE Methionine--tRNA ligase, cytoplasmic OS=Mus musculus OX=10090 GN=Mars1 PE=1 SV=1;sp|Q68FL6|SYMC_MOUSE Methionine--tRNA ligase, cytoplasmic OS=Mus musculus OX=10090 GN=Mars1 PE=1 SV=1	6	20071000	15544000	11101000	12669000	13220000	11728000	7982100	13065000	13626000	12543000	1265100	361612	14458000	5763200	12737000	15412000	9155900	24072000	11298000	72577000	580933	10844000	7852900	14726000	4939100	14237000	14440000	13500000	13014000	11914000	2002800	12332000
E9QK62	E9QK62;Q8CHT1-2;Q8CHT1	Ephexin-1	Ngef	tr|E9QK62|E9QK62_MOUSE Ephexin-1 OS=Mus musculus OX=10090 GN=Ngef PE=1 SV=1;sp|Q8CHT1-2|NGEF_MOUSE Isoform 2 of Ephexin-1 OS=Mus musculus OX=10090 GN=Ngef;sp|Q8CHT1|NGEF_MOUSE Ephexin-1 OS=Mus musculus OX=10090 GN=Ngef PE=1 SV=1	2	9652600	12663000	9469800	10119000	7744800	499532	7828700	319865	10258000	10266000	8808900	12987000	11158000	9766900	11437000	389028	342233	11164000	312879	9142600	580933	9996700	13183000	478808	8414100	10167000	11054000	12425000	620123	10302000	325998	12999000
E9QLA5	E9QLA5;Q0GNC1-3;Q0GNC1;A0A1Y7VM80	Inverted formin-2	Inf2	tr|E9QLA5|E9QLA5_MOUSE Inverted formin-2 OS=Mus musculus OX=10090 GN=Inf2 PE=1 SV=1;sp|Q0GNC1-3|INF2_MOUSE Isoform 2 of Inverted formin-2 OS=Mus musculus OX=10090 GN=Inf2;sp|Q0GNC1|INF2_MOUSE Inverted formin-2 OS=Mus musculus OX=10090 GN=Inf2 PE=1 SV=1;tr|	2	490483	430182	396905	356080	346898	499532	560352	319865	360188	350936	336680	361612	400566	376107	409718	389028	342233	1370900	312879	1431800	580933	385656	323890	478808	466503	344674	451250	415610	1161800	330431	325998	448316
E9QN37	E9QN37;A1L314	Macrophage-expressed gene 1 protein	Mpeg1	tr|E9QN37|E9QN37_MOUSE Macrophage-expressed gene 1 protein OS=Mus musculus OX=10090 GN=Mpeg1 PE=1 SV=1;sp|A1L314|MPEG1_MOUSE Macrophage-expressed gene 1 protein OS=Mus musculus OX=10090 GN=Mpeg1 PE=1 SV=1	2	490483	430182	396905	356080	58917000	39483000	48260000	319865	360188	350936	33278000	361612	400566	376107	53032000	389028	342233	747486	312879	746728	580933	385656	323890	48712000	466503	344674	53469000	415610	48074000	60560000	62084000	52005000
E9QNH6	E9QNH6;E9Q580;Q7TQD7;P46735-2;P46735	Unconventional myosin-Ib	Myo1b	tr|E9QNH6|E9QNH6_MOUSE Unconventional myosin-Ib OS=Mus musculus OX=10090 GN=Myo1b PE=1 SV=1;tr|E9Q580|E9Q580_MOUSE Unconventional myosin-Ib OS=Mus musculus OX=10090 GN=Myo1b PE=1 SV=1;tr|Q7TQD7|Q7TQD7_MOUSE Myo1b protein OS=Mus musculus OX=10090 GN=Myo1b P	5	490483	430182	396905	356080	346898	499532	560352	319865	360188	350936	336680	361612	400566	376107	409718	389028	342233	8890200	312879	6524300	580933	385656	323890	478808	466503	344674	451250	415610	10477000	330431	325998	448316
F6Q325	F6Q325;Q9CZA6-4;Q9ERR1-2;Q9CZA6-3;Q9CZA6-2;Q9CZA6;Q9ERR1	Nuclear distribution protein nudE homolog 1;Nuclear distribution protein nudE-like 1	Nde1;Ndel1	tr|F6Q325|F6Q325_MOUSE Nuclear distribution protein nudE homolog 1 (Fragment) OS=Mus musculus OX=10090 GN=Nde1 PE=1 SV=1;sp|Q9CZA6-4|NDE1_MOUSE Isoform 4 of Nuclear distribution protein nudE homolog 1 OS=Mus musculus OX=10090 GN=Nde1;sp|Q9ERR1-2|NDEL1_MOUS	1	4671800	4883900	5171200	4879100	4761900	5338200	4578700	5556700	4440100	4456700	4622600	5072000	5597100	5063600	4339200	4986900	5397500	4076700	5507200	4000800	5255500	4387200	5174800	4726900	4587400	4791800	5277100	4693700	4003200	4908300	5199700	5354100
F6QFE9	F6QFE9	AarF domain containing kinase 2	Adck2	tr|F6QFE9|F6QFE9_MOUSE Uncharacterized aarF domain-containing protein kinase 2 (Fragment) OS=Mus musculus OX=10090 GN=Adck2 PE=4 SV=1	1	490483	430182	396905	356080	346898	499532	560352	319865	360188	350936	336680	361612	400566	376107	409718	389028	342233	747486	312879	746728	580933	385656	323890	478808	466503	344674	451250	415610	620123	330431	325998	448316
F6QPF7	F6QPF7;F6XTT6;F6RUP6;F6YX19;A0A087WSN5;F7DFD7;Q99LV7	Phosphatidylinositol-glycan biosynthesis class X protein	Pigx	tr|F6QPF7|F6QPF7_MOUSE Phosphatidylinositol-glycan biosynthesis class X protein OS=Mus musculus OX=10090 GN=Pigx PE=4 SV=1;tr|F6XTT6|F6XTT6_MOUSE Phosphatidylinositol-glycan biosynthesis class X protein OS=Mus musculus OX=10090 GN=Pigx PE=4 SV=1;tr|F6RUP6|	1	490483	430182	396905	356080	346898	6960800	560352	319865	360188	350936	336680	361612	400566	376107	409718	389028	342233	747486	3480900	746728	580933	385656	323890	478808	466503	4649800	451250	4516800	620123	330431	325998	448316
F6QYF8	F6QYF8;E9Q039;Q11011;E9Q6F4;F6V7K3;F2Z3V5;F7ANF4	Puromycin-sensitive aminopeptidase	Npepps	tr|F6QYF8|F6QYF8_MOUSE Aminopeptidase (Fragment) OS=Mus musculus OX=10090 GN=Npepps PE=1 SV=1;tr|E9Q039|E9Q039_MOUSE Aminopeptidase OS=Mus musculus OX=10090 GN=Npepps PE=1 SV=1;sp|Q11011|PSA_MOUSE Puromycin-sensitive aminopeptidase OS=Mus musculus OX=10090	7	490483	430182	396905	356080	346898	499532	2797400	319865	360188	350936	336680	361612	400566	376107	409718	389028	342233	16523000	312879	14451000	580933	385656	323890	478808	466503	344674	451250	415610	20516000	330431	325998	448316
F6RJE8	F6RJE8;O70172;Q80XI4	Phosphatidylinositol 5-phosphate 4-kinase type-2 alpha;Phosphatidylinositol 5-phosphate 4-kinase type-2 beta	Pip4k2a;Pip4k2b	tr|F6RJE8|F6RJE8_MOUSE Phosphatidylinositol 5-phosphate 4-kinase type-2 alpha (Fragment) OS=Mus musculus OX=10090 GN=Pip4k2a PE=1 SV=1;sp|O70172|PI42A_MOUSE Phosphatidylinositol 5-phosphate 4-kinase type-2 alpha OS=Mus musculus OX=10090 GN=Pip4k2a PE=1 SV=	1	490483	430182	396905	356080	346898	6758900	560352	319865	5798600	350936	336680	361612	6929900	376107	9273800	389028	342233	747486	312879	746728	580933	385656	6640700	4879700	466503	344674	451250	415610	620123	7019600	325998	448316
F6RJV6	F6RJV6;Q9JJK2	LanC-like protein 2	Lancl2	tr|F6RJV6|F6RJV6_MOUSE LanC-like protein 2 (Fragment) OS=Mus musculus OX=10090 GN=Lancl2 PE=1 SV=1;sp|Q9JJK2|LANC2_MOUSE LanC-like protein 2 OS=Mus musculus OX=10090 GN=Lancl2 PE=1 SV=1	4	490483	4804300	5053800	356080	346898	499532	560352	319865	360188	7026400	336680	361612	4201800	376107	409718	389028	342233	5316400	312879	4188000	580933	385656	323890	478808	4463600	344674	451250	4914900	7992500	330431	325998	448316
F6SG70	F6SG70;E0CZD9;E0CXM9;A0A494B9Y9;Q9DB43	Zinc finger protein-like 1	Gm28374;Zfpl1	tr|F6SG70|F6SG70_MOUSE Predicted gene 28374 OS=Mus musculus OX=10090 GN=Gm28374 PE=4 SV=3;tr|E0CZD9|E0CZD9_MOUSE Zinc finger protein-like 1 (Fragment) OS=Mus musculus OX=10090 GN=Zfpl1 PE=1 SV=1;tr|E0CXM9|E0CXM9_MOUSE Zinc finger protein-like 1 (Fragment)	1	506370	340390	623570	228800	346898	416250	473340	185580	360188	296300	525940	248720	340160	516190	409718	219340	285750	609590	312879	424970	580933	514150	171500	190610	393250	387490	253110	401090	427080	260640	379120	284870
F6TDZ2	F6TDZ2;Q6P2B1;Q6P2B1-2	Transportin-3	Tnpo3	tr|F6TDZ2|F6TDZ2_MOUSE Transportin-3 (Fragment) OS=Mus musculus OX=10090 GN=Tnpo3 PE=1 SV=1;sp|Q6P2B1|TNPO3_MOUSE Transportin-3 OS=Mus musculus OX=10090 GN=Tnpo3 PE=1 SV=1;sp|Q6P2B1-2|TNPO3_MOUSE Isoform 2 of Transportin-3 OS=Mus musculus OX=10090 GN=Tnpo3	1	490483	430182	396905	356080	346898	499532	560352	319865	360188	350936	336680	361612	400566	376107	409718	389028	342233	2767100	312879	3162400	580933	385656	323890	478808	466503	344674	451250	415610	2670600	330431	325998	448316
F6TN03	F6TN03;P70122	Ribosome maturation protein SBDS	Sbds	tr|F6TN03|F6TN03_MOUSE Ribosome maturation protein SBDS (Fragment) OS=Mus musculus OX=10090 GN=Sbds PE=1 SV=1;sp|P70122|SBDS_MOUSE Ribosome maturation protein SBDS OS=Mus musculus OX=10090 GN=Sbds PE=1 SV=4	2	490483	430182	396905	3294300	346898	499532	4879700	319865	360188	350936	336680	361612	400566	376107	409718	389028	3685600	8261800	312879	7600800	580933	385656	323890	478808	466503	344674	451250	415610	19443000	4452900	325998	448316
F6TUL9	F6TUL9	V-set and immunoglobulin domain containing 4	Vsig4	tr|F6TUL9|F6TUL9_MOUSE V-set and immunoglobulin domain-containing 4 OS=Mus musculus OX=10090 GN=Vsig4 PE=1 SV=1	2	490483	430182	27804000	17134000	20406000	499532	13877000	14826000	360188	17467000	27084000	361612	22923000	376107	15143000	8238500	342233	747486	10329000	746728	580933	385656	323890	478808	11567000	344674	451250	415610	9420800	6383600	325998	8691900
F6VRP8	F6VRP8	Lectin, galactoside-binding, soluble, 3 binding protein	Lgals3bp	tr|F6VRP8|F6VRP8_MOUSE Galectin-3-binding protein (Fragment) OS=Mus musculus OX=10090 GN=Lgals3bp PE=1 SV=1	1	23009000	430182	13135000	356080	8880100	15117000	8670500	10433000	7605200	11173000	8705100	9696100	7900000	9143000	409718	13877000	342233	747486	312879	746728	580933	7897300	323890	478808	9887600	13884000	10168000	15631000	620123	5227000	325998	448316
F6W1A2	F6W1A2;Q8BUK6	Protein Hook homolog 3	Hook3	tr|F6W1A2|F6W1A2_MOUSE Protein Hook homolog 3 (Fragment) OS=Mus musculus OX=10090 GN=Hook3 PE=1 SV=2;sp|Q8BUK6|HOOK3_MOUSE Protein Hook homolog 3 OS=Mus musculus OX=10090 GN=Hook3 PE=1 SV=2	1	490483	430182	396905	356080	346898	499532	560352	2938400	360188	2485600	336680	361612	400566	2207700	409718	389028	342233	5845100	312879	6102300	580933	2271100	323890	478808	466503	2540000	451250	415610	4232100	3487800	3198400	448316
F6W2Q5	F6W2Q5;Q5JC28;H3BK65;P42567	Epidermal growth factor receptor substrate 15	Eps15	tr|F6W2Q5|F6W2Q5_MOUSE Epidermal growth factor receptor substrate 15 OS=Mus musculus OX=10090 GN=Eps15 PE=1 SV=1;tr|Q5JC28|Q5JC28_MOUSE Epidermal growth factor receptor pathway substrate 15 isoform B OS=Mus musculus OX=10090 GN=Eps15 PE=1 SV=1;tr|H3BK65|H3	1	490483	3501100	2186600	356080	3878700	3384000	4225100	2438200	360188	2822500	336680	3007800	3661300	3221800	2412400	389028	342233	4023700	2952000	4483000	580933	385656	7807800	3778800	2339100	3420000	451250	415610	3775400	2743100	325998	448316
F6W3U3	F6W3U3;F6X1P1;B8JJ66;B8JJ69	RIKEN cDNA 2310061I04 gene	2310061I04Rik	tr|F6W3U3|F6W3U3_MOUSE RIKEN cDNA 2310061I04 gene (Fragment) OS=Mus musculus OX=10090 GN=2310061I04Rik PE=1 SV=1;tr|F6X1P1|F6X1P1_MOUSE RIKEN cDNA 2310061I04 gene (Fragment) OS=Mus musculus OX=10090 GN=2310061I04Rik PE=1 SV=1;tr|B8JJ66|B8JJ66_MOUSE RIKEN c	1	490483	430182	396905	356080	346898	499532	560352	319865	360188	350936	336680	361612	400566	376107	409718	389028	342233	747486	312879	746728	580933	385656	323890	478808	466503	4474300	451250	415610	620123	330431	2367400	448316
F6WHQ7	F6WHQ7	Glutathione S-transferase, mu 1	Gstm1	tr|F6WHQ7|F6WHQ7_MOUSE Glutathione S-transferase Mu 1 (Fragment) OS=Mus musculus OX=10090 GN=Gstm1 PE=1 SV=1	1	490483	430182	5378700	7893400	6225000	499532	7354800	319865	9411400	9058800	336680	6266800	9607000	376107	6512500	389028	7311800	747486	6008500	12914000	580933	385656	5980400	478808	466503	344674	451250	415610	6478900	330431	325998	7199500
F6X4N5	F6X4N5;Q8BVI5;F7CJY7;B7ZCB8	Syntaxin-16	Stx16	tr|F6X4N5|F6X4N5_MOUSE Syntaxin-16 OS=Mus musculus OX=10090 GN=Stx16 PE=1 SV=1;sp|Q8BVI5|STX16_MOUSE Syntaxin-16 OS=Mus musculus OX=10090 GN=Stx16 PE=1 SV=3;tr|F7CJY7|F7CJY7_MOUSE Syntaxin-16 (Fragment) OS=Mus musculus OX=10090 GN=Stx16 PE=1 SV=1	3	1841700	2047500	1907800	2261800	1680300	2132000	2166200	319865	2163500	1616200	1576400	1674800	1507600	2172700	1685300	2467900	342233	1989700	312879	2370700	3675000	2471600	323890	478808	2628700	1640200	451250	2377600	1345300	330431	2164400	1876000
F6ZCU9	F6ZCU9;Q80ZQ9	Protein Simiate	Fam206a	tr|F6ZCU9|F6ZCU9_MOUSE Protein Abitram (Fragment) OS=Mus musculus OX=10090 GN=Abitram PE=1 SV=1;sp|Q80ZQ9|ABITM_MOUSE Protein Abitram OS=Mus musculus OX=10090 GN=Abitram PE=1 SV=2	1	458550	695880	556540	338030	376200	305110	496690	329190	637260	353060	525320	638780	478140	434370	451820	480380	283490	310030	311170	376760	580933	287030	335220	478808	386580	336000	567130	282510	224050	295730	208570	485790
F6ZGI7	F6ZGI7;Q9Z224	Molybdopterin synthase sulfur carrier subunit	Mocs2	tr|F6ZGI7|F6ZGI7_MOUSE Molybdopterin synthase sulfur carrier subunit OS=Mus musculus OX=10090 GN=Mocs2 PE=1 SV=1;sp|Q9Z224|MOC2A_MOUSE Molybdopterin synthase sulfur carrier subunit OS=Mus musculus OX=10090 GN=Mocs2 PE=1 SV=1	1	16641000	17321000	17071000	9263400	12096000	22663000	17667000	14906000	16352000	11248000	11333000	9851100	12863000	376107	11787000	11980000	13905000	12253000	13146000	14132000	580933	19701000	9162600	16556000	14701000	10798000	14229000	16630000	13972000	7756000	13845000	17750000
F6ZMN8	F6ZMN8;Z4YN17;Q5NBU8-3;Q5NBU8	XIAP-associated factor 1	Xaf1	tr|F6ZMN8|F6ZMN8_MOUSE XIAP-associated factor 1 OS=Mus musculus OX=10090 GN=Xaf1 PE=1 SV=1;tr|Z4YN17|Z4YN17_MOUSE XIAP-associated factor 1 (Fragment) OS=Mus musculus OX=10090 GN=Xaf1 PE=1 SV=1;sp|Q5NBU8-3|XAF1_MOUSE Isoform 2 of XIAP-associated factor 1 OS	1	34240000	14243000	14611000	18988000	13639000	27313000	19534000	12545000	15565000	14339000	19119000	14930000	12292000	17942000	18723000	28100000	13872000	7818200	10413000	9166200	16479000	14762000	10440000	17350000	13643000	19184000	18797000	15501000	7542400	13882000	12711000	15498000
F7A1B4	F7A1B4;Q3UAM9;Q63961;F7BZW0	Endoglin	Eng	tr|F7A1B4|F7A1B4_MOUSE Endoglin OS=Mus musculus OX=10090 GN=Eng PE=1 SV=1;tr|Q3UAM9|Q3UAM9_MOUSE Endoglin OS=Mus musculus OX=10090 GN=Eng PE=1 SV=1;sp|Q63961|EGLN_MOUSE Endoglin OS=Mus musculus OX=10090 GN=Eng PE=1 SV=2	3	490483	430182	396905	5747800	5913800	6075400	560352	6990000	360188	350936	336680	4502900	5702400	376107	409718	389028	342233	5133500	312879	746728	580933	385656	6143100	478808	466503	7139700	451250	415610	5216300	330431	325998	448316
F7BBH5	F7BBH5;Q6GQS1;F6X0P2	Calcium-binding mitochondrial carrier protein SCaMC-3	Slc25a23	tr|F7BBH5|F7BBH5_MOUSE Calcium-binding mitochondrial carrier protein SCaMC-3 (Fragment) OS=Mus musculus OX=10090 GN=Slc25a23 PE=1 SV=1;sp|Q6GQS1|SCMC3_MOUSE Calcium-binding mitochondrial carrier protein SCaMC-3 OS=Mus musculus OX=10090 GN=Slc25a23 PE=1 SV=	2	490483	430182	396905	356080	346898	499532	560352	319865	360188	350936	336680	361612	400566	376107	409718	389028	342233	4975700	312879	3130900	580933	385656	323890	478808	466503	344674	451250	415610	3300200	330431	325998	448316
F7BJK1	F7BJK1	Protocadherin 1	Pcdh1	tr|F7BJK1|F7BJK1_MOUSE Protocadherin 1 (Fragment) OS=Mus musculus OX=10090 GN=Pcdh1 PE=1 SV=1	6	13538000	13525000	11768000	14768000	14860000	14724000	10168000	319865	14015000	8282600	14298000	12902000	11483000	10284000	15895000	18459000	12710000	10371000	10578000	12656000	11466000	13591000	19497000	10758000	19310000	25003000	12427000	17038000	11050000	12980000	325998	11546000
F7C528	F7C528;E9Q614;B1AR17;F6WR45;E9QAS4;E9QAS5;Q6PDQ2	Chromodomain-helicase-DNA-binding protein 4	Chd3;Chd4	tr|F7C528|F7C528_MOUSE DNA helicase (Fragment) OS=Mus musculus OX=10090 GN=Chd3 PE=1 SV=1;tr|E9Q614|E9Q614_MOUSE DNA helicase OS=Mus musculus OX=10090 GN=Chd3 PE=1 SV=1;tr|B1AR17|B1AR17_MOUSE DNA helicase OS=Mus musculus OX=10090 GN=Chd3 PE=1 SV=1;tr|F6WR4	2	490483	106780	92549	356080	346898	499532	560352	319865	360188	104450	138700	77026	400566	376107	409718	389028	342233	749660	312879	479630	580933	385656	67940	478808	466503	344674	451250	415610	189890	330431	325998	448316
F7CBP1	F7CBP1;G3XA17;Q62448-2;Q62448	Eukaryotic translation initiation factor 4 gamma 2	Eif4g2	tr|F7CBP1|F7CBP1_MOUSE Eukaryotic translation initiation factor 4 gamma 2 OS=Mus musculus OX=10090 GN=Eif4g2 PE=1 SV=1;tr|G3XA17|G3XA17_MOUSE Eukaryotic translation initiation factor 4 gamma 2 OS=Mus musculus OX=10090 GN=Eif4g2 PE=1 SV=1;sp|Q62448-2|IF4G2_	8	1805000	3894400	3190200	2338000	2662800	2596500	4442400	1829600	1332200	2333800	2339200	2406400	2593100	4114100	409718	2274300	2273800	10955000	1794700	21214000	3829600	4855700	3932800	2017200	5830200	3802000	2249900	3328200	11101000	2514900	3501800	448316
F7CVJ5	F7CVJ5;E9PYB0;F7DBB3	AHNAK nucleoprotein 2	Ahnak2	tr|F7CVJ5|F7CVJ5_MOUSE AHNAK nucleoprotein 2 (Fragment) OS=Mus musculus OX=10090 GN=Ahnak2 PE=1 SV=1;tr|E9PYB0|E9PYB0_MOUSE AHNAK nucleoprotein 2 (Fragment) OS=Mus musculus OX=10090 GN=Ahnak2 PE=1 SV=8;tr|F7DBB3|F7DBB3_MOUSE AHNAK nucleoprotein 2 (Fragment	2	30784000	16376000	12163000	15681000	18719000	16908000	16445000	19515000	14152000	17260000	17449000	15306000	16001000	17124000	409718	11123000	15489000	11158000	312879	13757000	15261000	19852000	17119000	16270000	16336000	19748000	8076300	18288000	16798000	20430000	14366000	15048000
F7D1I5	F7D1I5;G3UXY6;Q78HU7	Glycophorin-C	Gypc	tr|F7D1I5|F7D1I5_MOUSE Glycophorin-C OS=Mus musculus OX=10090 GN=Gypc PE=1 SV=2;tr|G3UXY6|G3UXY6_MOUSE Glycophorin-C OS=Mus musculus OX=10090 GN=Gypc PE=1 SV=1;sp|Q78HU7|GLPC_MOUSE Glycophorin-C OS=Mus musculus OX=10090 GN=Gypc PE=1 SV=2	1	490483	13558000	396905	356080	13267000	12397000	10623000	319865	360188	350936	10323000	13228000	17189000	376107	409718	389028	342233	747486	312879	746728	580933	385656	323890	478808	10872000	344674	451250	415610	620123	330431	325998	448316
F8VPU2	F8VPU2;E9Q805	FERM, RhoGEF and pleckstrin domain-containing protein 1	Farp1	sp|F8VPU2|FARP1_MOUSE FERM, ARHGEF and pleckstrin domain-containing protein 1 OS=Mus musculus OX=10090 GN=Farp1 PE=1 SV=1	3	3182400	2284700	396905	356080	346898	499532	560352	319865	360188	350936	336680	361612	400566	376107	409718	389028	2609500	3337200	312879	746728	580933	385656	323890	478808	466503	344674	451250	415610	620123	330431	325998	448316
F8VPX1	F8VPX1;E9PXY8;Q6A4J8-3;Q6A4J8;Q6A4J8-2;G3UWR8	Ubiquitin carboxyl-terminal hydrolase;Ubiquitin carboxyl-terminal hydrolase 7	Usp7	tr|F8VPX1|F8VPX1_MOUSE Ubiquitin carboxyl-terminal hydrolase 7 OS=Mus musculus OX=10090 GN=Usp7 PE=1 SV=1;tr|E9PXY8|E9PXY8_MOUSE Ubiquitin carboxyl-terminal hydrolase 7 OS=Mus musculus OX=10090 GN=Usp7 PE=1 SV=1;sp|Q6A4J8-3|UBP7_MOUSE Isoform 3 of Ubiquiti	2	490483	430182	3341300	356080	346898	499532	560352	319865	360188	350936	336680	361612	400566	376107	3737400	3944400	342233	4942600	4747000	5515200	580933	3790600	323890	478808	466503	4616000	451250	415610	5503600	330431	325998	448316
F8WIA3	F8WIA3;J3QMA2;J3QK34;P0C8B4	Uncharacterized protein C14orf142 homolog	Gm20604;Gm28051;AK010878	tr|F8WIA3|F8WIA3_MOUSE Predicted gene 20604 OS=Mus musculus OX=10090 GN=Gm20604 PE=4 SV=1;tr|J3QMA2|J3QMA2_MOUSE Predicted gene, 28051 OS=Mus musculus OX=10090 GN=Gm28051 PE=4 SV=1;tr|J3QK34|J3QK34_MOUSE EKC/KEOPS complex subunit GON7 OS=Mus musculus OX=10	1	490483	430182	13283000	13450000	13781000	499532	10873000	319865	9687800	6894700	14048000	13276000	9854100	13606000	13693000	20992000	9701100	747486	10161000	4432400	580933	9144100	8571900	478808	7018200	11448000	11538000	16154000	620123	10868000	325998	13631000
F8WIE5	F8WIE5;Q69ZR2	E3 ubiquitin-protein ligase HECTD1	Hectd1	tr|F8WIE5|F8WIE5_MOUSE HECT-type E3 ubiquitin transferase OS=Mus musculus OX=10090 GN=Hectd1 PE=1 SV=1;sp|Q69ZR2|HECD1_MOUSE E3 ubiquitin-protein ligase HECTD1 OS=Mus musculus OX=10090 GN=Hectd1 PE=1 SV=2	1	490483	430182	396905	356080	346898	499532	560352	319865	360188	350936	336680	361612	400566	376107	409718	389028	342233	747486	312879	746728	580933	385656	323890	478808	466503	344674	451250	415610	620123	330431	325998	448316
G3UVU2	G3UVU2;D3YW09;Q62203	Splicing factor 3A subunit 2	Sf3a2	tr|G3UVU2|G3UVU2_MOUSE Splicing factor 3A subunit 2 OS=Mus musculus OX=10090 GN=Sf3a2 PE=1 SV=1;tr|D3YW09|D3YW09_MOUSE Splicing factor 3A subunit 2 OS=Mus musculus OX=10090 GN=Sf3a2 PE=1 SV=1;sp|Q62203|SF3A2_MOUSE Splicing factor 3A subunit 2 OS=Mus muscul	2	490483	2471200	4773900	4308400	4227500	3392600	3221700	4562200	4264800	2850300	4053500	5040300	3531100	3169400	409718	3532900	4863600	4084100	3674600	2378700	580933	3954100	4731300	3687500	4181000	4171000	4856800	4086300	4227700	5303400	2381600	3399600
G3UW82	G3UW82;Q5SX39;E9Q264;P13541	Myosin-4	Myh2;Myh4	tr|G3UW82|G3UW82_MOUSE Myosin, heavy polypeptide 2, skeletal muscle, adult OS=Mus musculus OX=10090 GN=Myh2 PE=1 SV=1;sp|Q5SX39|MYH4_MOUSE Myosin-4 OS=Mus musculus OX=10090 GN=Myh4 PE=2 SV=1	6	490483	430182	396905	356080	346898	499532	560352	319865	360188	350936	336680	361612	9561500	376107	409718	389028	342233	747486	312879	746728	580933	385656	323890	478808	6139200	344674	451250	415610	620123	330431	325998	448316
G3UX73	G3UX73;G3UX52;G3UY97;P97819-2;P97819	85/88 kDa calcium-independent phospholipase A2	Pla2g6	tr|G3UX73|G3UX73_MOUSE 85/88 kDa calcium-independent phospholipase A2 (Fragment) OS=Mus musculus OX=10090 GN=Pla2g6 PE=1 SV=1;tr|G3UX52|G3UX52_MOUSE 85/88 kDa calcium-independent phospholipase A2 (Fragment) OS=Mus musculus OX=10090 GN=Pla2g6 PE=1 SV=1;tr|G	1	490483	430182	396905	356080	346898	499532	560352	319865	360188	350936	336680	361612	400566	376107	409718	389028	342233	747486	312879	746728	580933	385656	323890	478808	466503	344674	451250	415610	620123	330431	325998	448316
G3UXV8	G3UXV8;G3UZ57;Q9DB73-2;Q9DB73	NADH-cytochrome b5 reductase 1	Cyb5r1	tr|G3UXV8|G3UXV8_MOUSE NADH-cytochrome b5 reductase 1 (Fragment) OS=Mus musculus OX=10090 GN=Cyb5r1 PE=1 SV=1;tr|G3UZ57|G3UZ57_MOUSE NADH-cytochrome b5 reductase 1 (Fragment) OS=Mus musculus OX=10090 GN=Cyb5r1 PE=1 SV=1;sp|Q9DB73-2|NB5R1_MOUSE Isoform 2 of	1	490483	430182	396905	356080	346898	499532	560352	319865	360188	350936	336680	361612	400566	376107	409718	389028	342233	747486	312879	746728	580933	385656	323890	478808	466503	344674	451250	415610	620123	330431	325998	448316
G3UYE3	G3UYE3;G3X927;D3YW42;Q8VC31	Coiled-coil domain-containing protein 9	Ccdc9	tr|G3UYE3|G3UYE3_MOUSE Coiled-coil domain-containing protein 9 (Fragment) OS=Mus musculus OX=10090 GN=Ccdc9 PE=1 SV=1;tr|G3X927|G3X927_MOUSE Coiled-coil domain-containing protein 9 OS=Mus musculus OX=10090 GN=Ccdc9 PE=1 SV=1;tr|D3YW42|D3YW42_MOUSE Coiled-c	1	2465800	1481200	1940700	1138000	1377900	1802800	1748800	1297300	1287500	1097900	2167600	1450100	1422200	1664400	1282200	1451200	1012400	807930	1005800	748880	580933	1828600	824650	1750400	1368400	1641900	1552200	1979700	888340	1137100	974420	1676700
G3UYJ3	G3UYJ3;A2AKV9;A2AKW0;Q5HZI9	Solute carrier family 25 member 51	Slc25a51	tr|G3UYJ3|G3UYJ3_MOUSE Solute carrier family 25 member 51 (Fragment) OS=Mus musculus OX=10090 GN=Slc25a51 PE=1 SV=8;tr|A2AKV9|A2AKV9_MOUSE Solute carrier family 25 member 51 (Fragment) OS=Mus musculus OX=10090 GN=Slc25a51 PE=1 SV=8;tr|A2AKW0|A2AKW0_MOUSE S	1	490483	430182	396905	356080	346898	499532	560352	319865	360188	350936	336680	361612	400566	376107	409718	389028	342233	3242200	312879	2397800	580933	385656	323890	478808	466503	344674	451250	415610	2933600	330431	325998	448316
G3UYL4	G3UYL4;Q3U1Z5-2;Q3U1Z5	G-protein-signaling modulator 3	Gpsm3	tr|G3UYL4|G3UYL4_MOUSE G-protein-signaling modulator 3 (Fragment) OS=Mus musculus OX=10090 GN=Gpsm3 PE=1 SV=1;sp|Q3U1Z5-2|GPSM3_MOUSE Isoform 2 of G-protein-signaling modulator 3 OS=Mus musculus OX=10090 GN=Gpsm3;sp|Q3U1Z5|GPSM3_MOUSE G-protein-signaling m	1	2779600	1868900	2472000	2355900	1460600	2611100	1880300	1672700	1404700	1829600	2638400	361612	400566	2100200	409718	2716600	342233	747486	312879	746728	580933	1713300	323890	1243600	466503	344674	2317400	1336000	620123	330431	325998	448316
G3UZ30	G3UZ30;A5A4Y9;Q8K1L5	Protein phosphatase 1 regulatory subunit 11	Ppp1r11	tr|G3UZ30|G3UZ30_MOUSE E3 ubiquitin-protein ligase PPP1R11 (Fragment) OS=Mus musculus OX=10090 GN=Ppp1r11 PE=1 SV=2;tr|A5A4Y9|A5A4Y9_MOUSE E3 ubiquitin-protein ligase PPP1R11 OS=Mus musculus OX=10090 GN=Ppp1r11 PE=1 SV=1;sp|Q8K1L5|PP1RB_MOUSE E3 ubiquitin-	2	9365900	10126000	6873900	356080	9458900	8790800	6959800	319865	7001000	9457700	8977300	9903700	7454400	18050000	8277700	7354000	7386000	747486	6713400	746728	580933	8508700	5837900	478808	7178400	6038000	8138200	8789100	620123	5354300	8630300	12276000
G3UZJ9	G3UZJ9;E9PZ21;A0A6I8MX12;Q91W59-2;Q91W59-3;Q8BWL5-4;Q8BWL5-6;Q91W59;Q8BWL5-3;Q8BWL5-2;Q8BWL5;Q8BWL5-5	RNA-binding motif, single-stranded-interacting protein 1;RNA-binding motif, single-stranded-interacting protein 3	Rbms3;Rbms1	tr|G3UZJ9|G3UZJ9_MOUSE RNA-binding motif, single-stranded-interacting protein 3 (Fragment) OS=Mus musculus OX=10090 GN=Rbms3 PE=1 SV=1;tr|E9PZ21|E9PZ21_MOUSE RNA-binding motif, single-stranded-interacting protein 1 OS=Mus musculus OX=10090 GN=Rbms1 PE=1 SV	1	490483	430182	396905	356080	346898	499532	560352	319865	360188	350936	336680	361612	400566	376107	409718	389028	342233	747486	312879	746728	580933	385656	323890	478808	466503	344674	451250	415610	620123	330431	325998	448316
G3X8Q0	G3X8Q0;O89090-2;O89090	Transcription factor Sp1	Sp1	tr|G3X8Q0|G3X8Q0_MOUSE Transcription factor Sp1 OS=Mus musculus OX=10090 GN=Sp1 PE=1 SV=1;sp|O89090-2|SP1_MOUSE Isoform 2 of Transcription factor Sp1 OS=Mus musculus OX=10090 GN=Sp1;sp|O89090|SP1_MOUSE Transcription factor Sp1 OS=Mus musculus OX=10090 GN=S	1	490483	430182	396905	356080	346898	499532	560352	319865	360188	350936	336680	361612	400566	376107	409718	389028	342233	747486	312879	746728	580933	385656	323890	478808	466503	344674	451250	415610	620123	330431	325998	448316
G3X8S1	G3X8S1;Q9CQV7;Q9CQV7-3;Q9CQV7-2;D3Z5K6	Mitochondrial import inner membrane translocase subunit TIM14	Dnajc19	tr|G3X8S1|G3X8S1_MOUSE Mitochondrial import inner membrane translocase subunit TIM14 OS=Mus musculus OX=10090 GN=Dnajc19 PE=1 SV=1;sp|Q9CQV7|TIM14_MOUSE Mitochondrial import inner membrane translocase subunit TIM14 OS=Mus musculus OX=10090 GN=Dnajc19 PE=1	2	12590000	13015000	14260000	7507300	8067100	10257000	9865700	319865	15973000	11901000	14872000	11982000	10498000	14245000	8164700	12612000	21761000	13223000	13083000	12984000	580933	13842000	11964000	13453000	15622000	13161000	14912000	16055000	16579000	12494000	15389000	11872000
G3X8U3	G3X8U3	Queuosine salvage protein	2210016F16Rik	tr|G3X8U3|G3X8U3_MOUSE Queuosine salvage protein OS=Mus musculus OX=10090 GN=2210016F16Rik PE=1 SV=1	4	1688200	430182	396905	1447900	346898	499532	2428500	319865	360188	2142600	336680	1392900	400566	376107	409718	389028	342233	18712000	312879	12830000	580933	2401200	1712700	478808	2029500	344674	451250	415610	13328000	330431	1557800	448316
G3X8X1	G3X8X1;A0A3Q4EGC9;Q8VE09;A0A3Q4EGM1;A0A3Q4EHF6	Tetratricopeptide repeat protein 39C	Ttc39c	tr|G3X8X1|G3X8X1_MOUSE Tetratricopeptide repeat protein 39C OS=Mus musculus OX=10090 GN=Ttc39c PE=1 SV=2;tr|A0A3Q4EGC9|A0A3Q4EGC9_MOUSE Tetratricopeptide repeat protein 39C OS=Mus musculus OX=10090 GN=Ttc39c PE=1 SV=1;sp|Q8VE09|TT39C_MOUSE Tetratricopeptid	8	490483	430182	396905	356080	346898	499532	560352	319865	360188	350936	336680	361612	400566	376107	409718	389028	342233	18946000	312879	24357000	580933	385656	4756500	478808	5972600	344674	451250	415610	34552000	330431	325998	448316
G3X8X7	G3X8X7;Q920Q4-2;Q920Q4	Vacuolar protein sorting-associated protein 16 homolog	Vps16	tr|G3X8X7|G3X8X7_MOUSE Vacuolar protein sorting-associated protein 16 homolog OS=Mus musculus OX=10090 GN=Vps16 PE=1 SV=1;sp|Q920Q4-2|VPS16_MOUSE Isoform 2 of Vacuolar protein sorting-associated protein 16 homolog OS=Mus musculus OX=10090 GN=Vps16;sp|Q920Q	1	490483	430182	396905	356080	346898	499532	560352	319865	360188	350936	336680	361612	400566	376107	409718	389028	342233	747486	312879	746728	580933	385656	323890	478808	466503	344674	451250	415610	620123	330431	325998	448316
G3X9K3	G3X9K3;D3YYK9	Brefeldin A-inhibited guanine nucleotide-exchange protein 1	Arfgef1	sp|G3X9K3|BIG1_MOUSE Brefeldin A-inhibited guanine nucleotide-exchange protein 1 OS=Mus musculus OX=10090 GN=Arfgef1 PE=1 SV=1;tr|D3YYK9|D3YYK9_MOUSE Brefeldin A-inhibited guanine nucleotide-exchange protein 1 OS=Mus musculus OX=10090 GN=Arfgef1 PE=1 SV=1	2	490483	430182	396905	356080	346898	499532	560352	319865	16786000	18280000	20240000	17792000	18778000	376107	18463000	17954000	14868000	18336000	15569000	17745000	580933	16451000	18672000	478808	466503	344674	451250	415610	17783000	16111000	14703000	448316
G3X9X5	G3X9X5;D3Z5I1;Q3UPF5-2;Q3UPF5	Zinc finger CCCH-type antiviral protein 1	Zc3hav1	tr|G3X9X5|G3X9X5_MOUSE Zinc finger CCCH-type antiviral protein 1 OS=Mus musculus OX=10090 GN=Zc3hav1 PE=1 SV=1;tr|D3Z5I1|D3Z5I1_MOUSE Zinc finger CCCH-type antiviral protein 1 OS=Mus musculus OX=10090 GN=Zc3hav1 PE=1 SV=1;sp|Q3UPF5-2|ZCCHV_MOUSE Isoform 2	4	5101700	6541100	5698400	4748400	6232100	5234400	4181800	4565500	360188	3848700	3766300	5107500	400566	4259600	5334000	5369900	3496600	4435300	4399000	6344400	580933	4936500	5184700	5341000	4758700	5384500	4330500	415610	5329600	330431	325998	7458900
G3X9Y5	G3X9Y5;E9Q735;Q8VDS1;E9Q442	Ubiquitin conjugation factor E4 A	Ube4a	tr|G3X9Y5|G3X9Y5_MOUSE Ubiquitin conjugation factor E4 A OS=Mus musculus OX=10090 GN=Ube4a PE=1 SV=1;sp|E9Q735|UBE4A_MOUSE Ubiquitin conjugation factor E4 A OS=Mus musculus OX=10090 GN=Ube4a PE=1 SV=1;tr|Q8VDS1|Q8VDS1_MOUSE Ube4a protein OS=Mus musculus OX	2	490483	430182	396905	356080	346898	499532	560352	319865	360188	350936	336680	361612	400566	376107	409718	389028	342233	3506000	312879	3715700	580933	385656	323890	478808	466503	344674	451250	415610	3922400	330431	325998	448316
G3XA66	G3XA66;D3Z3F4;F7C846;P47802;G3XA75;G3UXX9;G3UXB5;G3UYJ5;D3YVW0	Metaxin-1	Mtx1	tr|G3XA66|G3XA66_MOUSE Metaxin-1 (Fragment) OS=Mus musculus OX=10090 GN=Mtx1 PE=1 SV=1;tr|D3Z3F4|D3Z3F4_MOUSE Metaxin OS=Mus musculus OX=10090 GN=Mtx1 PE=1 SV=2;tr|F7C846|F7C846_MOUSE Metaxin-1 OS=Mus musculus OX=10090 GN=Mtx1 PE=1 SV=1;sp|P47802|MTX1_MOUS	4	490483	3668900	396905	4360600	4104900	499532	7233700	4866900	4784300	5955900	336680	4837900	400566	376107	4519800	5491400	342233	21938000	312879	22579000	4841100	385656	7928600	478808	5682900	4986600	451250	415610	22708000	9487900	6950600	6346400
G5E866	G5E866;Q99NB9	Splicing factor 3B subunit 1	Sf3b1	tr|G5E866|G5E866_MOUSE Splicing factor 3B subunit 1 OS=Mus musculus OX=10090 GN=Sf3b1 PE=1 SV=1;sp|Q99NB9|SF3B1_MOUSE Splicing factor 3B subunit 1 OS=Mus musculus OX=10090 GN=Sf3b1 PE=1 SV=1	5	490483	9141100	396905	12587000	11973000	499532	4849400	12779000	8362200	9875900	9473000	11078000	400566	9809500	10423000	9458900	342233	32689000	10211000	18039000	580933	10122000	8926700	10174000	2707800	2653800	451250	415610	29333000	3127200	325998	8788000
G5E895	G5E895;D3Z494;S4R2G9	Aldo-keto reductase family 1, member B10 (aldose reductase)	Akr1b10	tr|G5E895|G5E895_MOUSE Aldo-keto reductase family 1, member B10 (aldose reductase) OS=Mus musculus OX=10090 GN=Akr1b10 PE=1 SV=1;tr|D3Z494|D3Z494_MOUSE Aldo-keto reductase family 1, member B10 (aldose reductase) OS=Mus musculus OX=10090 GN=Akr1b10 PE=1 SV=	1	7091300	4554800	2402000	3524200	2757000	3362100	2050500	2225100	1812000	3742000	2469200	3035600	3701700	4099700	2474400	4815200	2900900	747486	2039400	2901600	4858600	1854700	3405600	3329500	3321700	3645300	2825400	2525700	3560900	3658600	1436300	2199600
G5E8J6	G5E8J6	Histidine rich calcium binding protein	Hrc	tr|G5E8J6|G5E8J6_MOUSE Histidine-rich calcium-binding protein OS=Mus musculus OX=10090 GN=Hrc PE=1 SV=1	1	490483	430182	396905	356080	212930	499532	560352	319865	360188	350936	336680	361612	694730	376107	409718	389028	342233	747486	312879	746728	580933	385656	323890	478808	323270	344674	451250	415610	620123	330431	325998	448316
G5E8V9	G5E8V9;E9QAY5;A2RSX9;E9Q3G5	Arfaptin-1	Arfip1	tr|G5E8V9|G5E8V9_MOUSE ADP-ribosylation factor-interacting protein 1 OS=Mus musculus OX=10090 GN=Arfip1 PE=1 SV=1;tr|E9QAY5|E9QAY5_MOUSE Predicted gene, 37240 OS=Mus musculus OX=10090 GN=Gm37240 PE=4 SV=1;tr|A2RSX9|A2RSX9_MOUSE ADP-ribosylation factor inte	2	490483	6010600	396905	356080	6719100	499532	560352	319865	360188	7762500	336680	361612	400566	376107	409718	389028	342233	15200000	312879	10030000	580933	4633000	9051500	478808	466503	344674	451250	415610	9667500	330431	325998	448316
G8JL35	G8JL35;E0CYJ0;E0CXA9;Q6PEB6	MOB-like protein phocein	Mob4	tr|G8JL35|G8JL35_MOUSE MOB-like protein phocein (Fragment) OS=Mus musculus OX=10090 GN=Mob4 PE=1 SV=1;tr|E0CYJ0|E0CYJ0_MOUSE MOB-like protein phocein (Fragment) OS=Mus musculus OX=10090 GN=Mob4 PE=1 SV=1;tr|E0CXA9|E0CXA9_MOUSE MOB-like protein phocein OS=M	1	2427600	3049200	2627400	1706700	1836500	1909900	3056900	2429600	2486600	1818200	1824800	2453900	1546500	2127000	2112300	1319900	1708900	1809900	1929300	2083700	580933	2319600	1592000	1983600	3088200	1116300	2511300	2143000	1708600	1974300	2749800	2192200
H3BIW0	H3BIW0;G3X8T2;Q0P678;H3BJJ9	Zinc finger CCCH domain-containing protein 18	Zc3h18	tr|H3BIW0|H3BIW0_MOUSE Zinc finger CCCH domain-containing protein 18 OS=Mus musculus OX=10090 GN=Zc3h18 PE=1 SV=1;tr|G3X8T2|G3X8T2_MOUSE Zinc finger CCCH domain-containing protein 18 OS=Mus musculus OX=10090 GN=Zc3h18 PE=1 SV=1;sp|Q0P678|ZCH18_MOUSE Zinc f	2	1792700	2017300	2434100	356080	1922600	1684300	2096300	319865	1809200	1693600	2124900	1893800	2265500	376107	409718	1687000	1943200	1369800	2002400	1882100	1000500	2252300	1496900	478808	2046400	1591900	1832200	2061100	1032900	1454000	1653600	1991600
H3BIX4	H3BIX4;Z4YLB7;P97300-3;P97300-1;P97300;H3BKA7;P97300-4;A0A0A0MQN8	Neuroplastin	Nptn	tr|H3BIX4|H3BIX4_MOUSE Neuroplastin (Fragment) OS=Mus musculus OX=10090 GN=Nptn PE=1 SV=1;tr|Z4YLB7|Z4YLB7_MOUSE Neuroplastin OS=Mus musculus OX=10090 GN=Nptn PE=1 SV=1;sp|P97300-3|NPTN_MOUSE Isoform 3 of Neuroplastin OS=Mus musculus OX=10090 GN=Nptn;sp|P9	3	12022000	11553000	6428500	8922200	8302000	10040000	8541400	8999400	360188	350936	10672000	8589000	7220600	6692000	409718	8470100	342233	6034500	312879	746728	14646000	10793000	8660000	9242500	466503	6136600	8097500	13074000	620123	330431	9825900	8759900
H3BJ89	H3BJ89;H3BKP3;H3BJ02;I1E4X1;Q8K1E0-2;Q8K1E0	Syntaxin-5	Stx5a;Stx5	tr|H3BJ89|H3BJ89_MOUSE Syntaxin 5A OS=Mus musculus OX=10090 GN=Stx5a PE=1 SV=1;tr|H3BKP3|H3BKP3_MOUSE Syntaxin 5A (Fragment) OS=Mus musculus OX=10090 GN=Stx5a PE=1 SV=1;tr|H3BJ02|H3BJ02_MOUSE Syntaxin 5A OS=Mus musculus OX=10090 GN=Stx5a PE=1 SV=1;tr|I1E4X	1	490483	430182	396905	356080	346898	499532	560352	319865	360188	350936	336680	361612	400566	376107	409718	389028	342233	747486	312879	746728	580933	385656	323890	478808	466503	344674	451250	415610	620123	330431	325998	448316
H3BJZ1	H3BJZ1;Q9DB70	FUN14 domain-containing protein 1	Fundc1	tr|H3BJZ1|H3BJZ1_MOUSE FUN14 domain-containing protein 1 OS=Mus musculus OX=10090 GN=Fundc1 PE=1 SV=1;sp|Q9DB70|FUND1_MOUSE FUN14 domain-containing protein 1 OS=Mus musculus OX=10090 GN=Fundc1 PE=1 SV=1	1	2664000	430182	396905	1111800	1965800	2374000	560352	319865	1493300	350936	1623900	1825200	1505900	376107	3037200	2001200	1778600	1125500	2064500	746728	1600000	385656	323890	2301600	1672100	1639000	2096300	415610	620123	1807200	1630500	448316
H3BKN0	H3BKN0;Q1HFZ0-2;Q1HFZ0	tRNA (cytosine(34)-C(5))-methyltransferase	Nsun2	tr|H3BKN0|H3BKN0_MOUSE NOL1/NOP2/Sun domain family member 2 OS=Mus musculus OX=10090 GN=Nsun2 PE=1 SV=1;sp|Q1HFZ0-2|NSUN2_MOUSE Isoform 2 of RNA cytosine C(5)-methyltransferase NSUN2 OS=Mus musculus OX=10090 GN=Nsun2;sp|Q1HFZ0|NSUN2_MOUSE RNA cytosine C(5)	2	490483	430182	396905	356080	346898	499532	560352	319865	360188	350936	336680	361612	400566	376107	409718	389028	342233	4498300	312879	3407200	580933	385656	323890	478808	466503	344674	451250	415610	3578800	330431	325998	448316
H3BKV2	H3BKV2;H3BL72;P22361	Hepatocyte nuclear factor 1-alpha	Hnf1a	tr|H3BKV2|H3BKV2_MOUSE Hepatocyte nuclear factor 1-alpha OS=Mus musculus OX=10090 GN=Hnf1a PE=1 SV=1;tr|H3BL72|H3BL72_MOUSE Hepatocyte nuclear factor 1-alpha OS=Mus musculus OX=10090 GN=Hnf1a PE=1 SV=1;sp|P22361|HNF1A_MOUSE Hepatocyte nuclear factor 1-alph	1	1902700	2332000	1560600	2599800	1813300	2069000	2308900	2274900	1732500	1655100	2021700	2400200	1276300	1792700	1851500	2329100	2516500	1643600	2486200	1918300	580933	1902400	3185900	1807700	2480800	1996100	2147200	415610	2111400	1798300	2390500	1580300
H3BKY1	H3BKY1;H9H9R4;Q9JHJ3	Glycosylated lysosomal membrane protein	Glmp	tr|H3BKY1|H3BKY1_MOUSE Glycosylated lysosomal membrane protein OS=Mus musculus OX=10090 GN=Glmp PE=1 SV=1;tr|H9H9R4|H9H9R4_MOUSE Glycosylated lysosomal membrane protein OS=Mus musculus OX=10090 GN=Glmp PE=1 SV=1;sp|Q9JHJ3|GLMP_MOUSE Glycosylated lysosomal	1	11206000	12220000	14747000	10181000	7237000	12076000	10363000	13981000	360188	14605000	11035000	11741000	400566	13449000	13003000	14732000	342233	747486	11595000	746728	580933	385656	9770100	478808	10979000	344674	9140000	11713000	13040000	330431	325998	448316
H3BL27	H3BL27;Q8BZT9	Laccase domain-containing protein 1	Lacc1	tr|H3BL27|H3BL27_MOUSE Purine nucleoside phosphorylase LACC1 (Fragment) OS=Mus musculus OX=10090 GN=Lacc1 PE=1 SV=1;sp|Q8BZT9|LACC1_MOUSE Purine nucleoside phosphorylase LACC1 OS=Mus musculus OX=10090 GN=Lacc1 PE=1 SV=1	1	4122900	2608200	2412900	3010100	1441700	2260600	560352	319865	2089100	2869400	3810900	2129400	2223700	2462200	2016000	3155100	342233	1032500	1554000	1168000	580933	1576600	1562700	2258500	466503	1779000	451250	415610	620123	1229300	1410300	448316
H6TMF5	H6TMF5;P68181-2;P68181-3;P68181;P68181-4;A0A0G2JFT9	cAMP-dependent protein kinase catalytic subunit beta	Prkacb	tr|H6TMF5|H6TMF5_MOUSE cAMP-dependent protein kinase catalytic subunit beta (Fragment) OS=Mus musculus OX=10090 GN=Prkacb PE=1 SV=1;sp|P68181-2|KAPCB_MOUSE Isoform 2 of cAMP-dependent protein kinase catalytic subunit beta OS=Mus musculus OX=10090 GN=Prkacb	2	490483	430182	396905	356080	346898	499532	6385900	319865	360188	350936	336680	361612	400566	376107	409718	389028	342233	10684000	312879	9798900	580933	385656	323890	478808	466503	344674	451250	415610	7664200	330431	325998	448316
H7BX01	H7BX01;P58281;P58281-2;E0CXD1;F6U775	Dynamin-like 120 kDa protein, mitochondrial;Dynamin-like 120 kDa protein, form S1	Opa1	tr|H7BX01|H7BX01_MOUSE Dynamin-like 120 kDa protein, form S1 OS=Mus musculus OX=10090 GN=Opa1 PE=1 SV=1;sp|P58281|OPA1_MOUSE Dynamin-like 120 kDa protein, mitochondrial OS=Mus musculus OX=10090 GN=Opa1 PE=1 SV=1;sp|P58281-2|OPA1_MOUSE Isoform 2 of Dynamin-	12	490483	92324	396905	356080	230490	499532	616460	319865	360188	350936	336680	285840	400566	376107	91458	389028	342233	45080000	312879	19456000	580933	385656	125940	478808	237620	357590	451250	74132	34797000	306890	35785	448316
H7BXB1	H7BXB1;E9Q4G7;E9PWB2;Q8BK63-2;Q8BK63	Casein kinase I isoform alpha	Csnk1a1	tr|H7BXB1|H7BXB1_MOUSE Casein kinase I isoform alpha OS=Mus musculus OX=10090 GN=Csnk1a1 PE=1 SV=1;tr|E9Q4G7|E9Q4G7_MOUSE Casein kinase I isoform alpha OS=Mus musculus OX=10090 GN=Csnk1a1 PE=1 SV=1;tr|E9PWB2|E9PWB2_MOUSE Casein kinase I isoform alpha OS=Mu	1	4321200	5305100	3799300	4132500	4675900	3937800	4544800	4798000	4347600	4124500	336680	5872000	5906300	4922100	3071300	5779600	342233	4982100	4880700	6519200	580933	3120000	5950600	4784500	4987800	3828900	4052200	3250400	6913600	5065700	3027300	3067600
J3KMU5	J3KMU5;Q8K0R6	Glycolipid transfer protein domain-containing protein 2	Gltpd2	tr|J3KMU5|J3KMU5_MOUSE Glycolipid transfer protein domain-containing protein 2 OS=Mus musculus OX=10090 GN=Gltpd2 PE=1 SV=1;sp|Q8K0R6|GLTD2_MOUSE Glycolipid transfer protein domain-containing protein 2 OS=Mus musculus OX=10090 GN=Gltpd2 PE=1 SV=1	1	490483	1457100	1388100	1736600	1904600	976050	3488400	1610000	1528900	1500200	1240000	1493300	1699600	1458900	1632200	1850900	342233	4997100	2050500	5761600	580933	1298500	2432800	938900	2947100	3247400	2390000	1921500	5424000	2430600	1524500	1108800
J3QNY6	J3QNY6;Q9QY30	Bile salt export pump	Abcb11	tr|J3QNY6|J3QNY6_MOUSE Bile salt export pump OS=Mus musculus OX=10090 GN=Abcb11 PE=1 SV=1;sp|Q9QY30|ABCBB_MOUSE Bile salt export pump OS=Mus musculus OX=10090 GN=Abcb11 PE=1 SV=2	20	41270	430182	307740	176150	245740	499532	4048500	319865	247620	350936	336680	361612	113350	78415	693260	65833	110870	83536000	49147	62049000	580933	152820	804730	478808	735010	93125	451250	415610	51184000	859760	918810	448316
K3W4R2	K3W4R2;Q6URW6-2;Q6URW6;Q6URW6-3;A0A140LI60	Myosin-14	Myh14	tr|K3W4R2|K3W4R2_MOUSE Myosin-14 OS=Mus musculus OX=10090 GN=Myh14 PE=1 SV=1;sp|Q6URW6-2|MYH14_MOUSE Isoform 2 of Myosin-14 OS=Mus musculus OX=10090 GN=Myh14;sp|Q6URW6|MYH14_MOUSE Myosin-14 OS=Mus musculus OX=10090 GN=Myh14 PE=1 SV=1;sp|Q6URW6-3|MYH14_MOUS	1	490483	10198000	26246000	356080	346898	14058000	15165000	319865	10891000	17115000	336680	11399000	13537000	12342000	409718	389028	342233	43725000	312879	20743000	580933	14543000	15036000	478808	466503	344674	8784500	415610	46210000	19017000	325998	13713000
K7E6F1	K7E6F1;F8WIV2;Q60854;E9PYY0;E9Q3Y1;E9Q6X2;E9Q108;E9Q0P9;E9PZQ9;E9Q4R2	Serpin B6	Serpinb6a;Serpinb6	tr|K7E6F1|K7E6F1_MOUSE Serine (or cysteine) peptidase inhibitor, clade B, member 6a (Fragment) OS=Mus musculus OX=10090 GN=Serpinb6a PE=1 SV=1;tr|F8WIV2|F8WIV2_MOUSE Serine (or cysteine) peptidase inhibitor, clade B, member 6a OS=Mus musculus OX=10090 GN=S	3	490483	430182	396905	356080	346898	499532	560352	319865	360188	6999200	336680	361612	400566	376107	409718	389028	342233	16655000	312879	15477000	580933	385656	323890	478808	7506200	344674	451250	415610	12362000	330431	325998	448316
L7MUC7	L7MUC7	Major urinary protein 7	Mup7	tr|L7MUC7|L7MUC7_MOUSE Major urinary protein 7 (Fragment) OS=Mus musculus OX=10090 GN=Mup7 PE=3 SV=1	1	490483	430182	396905	356080	346898	499532	560352	319865	360188	350936	336680	361612	400566	376107	409718	389028	342233	5928100	312879	746728	580933	385656	19228000	28213000	24155000	344674	14582000	52613000	8423300	330431	325998	11778000
L7N466	L7N466;Q8R1G5	5-formyltetrahydrofolate cyclo-ligase	Mthfsl	tr|L7N466|L7N466_MOUSE 5-formyltetrahydrofolate cyclo-ligase OS=Mus musculus OX=10090 GN=Mthfsl PE=1 SV=1;tr|Q8R1G5|Q8R1G5_MOUSE 5-formyltetrahydrofolate cyclo-ligase OS=Mus musculus OX=10090 GN=Mthfsl PE=1 SV=1	1	60307000	44341000	42540000	45173000	34901000	50105000	37845000	50696000	41634000	46412000	43517000	50463000	54731000	42999000	57810000	68475000	50852000	33638000	47365000	38762000	62381000	33512000	42017000	54614000	39830000	55296000	28152000	39910000	33884000	50807000	40888000	35060000
M0QWK9	M0QWK9;Q8C8I3;E9PUG7;A0A0R4J298;Q61211;Q61211-2	Eukaryotic translation initiation factor 2D	Eif2d	tr|M0QWK9|M0QWK9_MOUSE Eukaryotic translation initiation factor 2D OS=Mus musculus OX=10090 GN=Eif2d PE=1 SV=1;tr|Q8C8I3|Q8C8I3_MOUSE Eukaryotic translation initiation factor 2D OS=Mus musculus OX=10090 GN=Eif2d PE=1 SV=1;tr|E9PUG7|E9PUG7_MOUSE Eukaryotic	1	490483	430182	396905	356080	346898	499532	560352	319865	360188	350936	336680	361612	400566	376107	409718	389028	342233	747486	312879	746728	580933	385656	323890	478808	466503	344674	451250	415610	620123	330431	325998	448316
O08529	O08529	Calpain-2 catalytic subunit	Capn2	sp|O08529|CAN2_MOUSE Calpain-2 catalytic subunit OS=Mus musculus OX=10090 GN=Capn2 PE=1 SV=4	5	490483	430182	5283100	356080	346898	499532	3726800	319865	2227600	2021000	336680	361612	400566	376107	1995100	389028	956460	16163000	312879	19436000	580933	385656	2039500	478808	5598400	344674	3218400	415610	9608200	4626900	4537500	1828000
O08582	O08582;A0A2R8W6M4;A0A2R8W6Z1;A0A2R8VI47	GTP-binding protein 1	Gtpbp1	sp|O08582|GTPB1_MOUSE GTP-binding protein 1 OS=Mus musculus OX=10090 GN=Gtpbp1 PE=1 SV=2;tr|A0A2R8W6M4|A0A2R8W6M4_MOUSE GTP-binding protein 1 (Fragment) OS=Mus musculus OX=10090 GN=Gtpbp1 PE=1 SV=1;tr|A0A2R8W6Z1|A0A2R8W6Z1_MOUSE GTP-binding protein 1 (Frag	2	490483	430182	396905	14238000	346898	499532	18635000	319865	360188	350936	336680	361612	400566	376107	409718	389028	342233	747486	312879	746728	580933	22762000	323890	478808	466503	344674	451250	415610	620123	12338000	325998	448316
O08692	O08692	Neutrophilic granule protein	Ngp	sp|O08692|NGP_MOUSE Neutrophilic granule protein OS=Mus musculus OX=10090 GN=Ngp PE=1 SV=1	3	21477000	29053000	30633000	25369000	27663000	25144000	8526700	319865	23185000	17771000	13041000	18756000	27583000	20409000	27774000	28886000	12326000	12582000	18175000	11450000	23299000	16453000	17067000	11410000	13150000	17798000	15660000	15653000	620123	13375000	8964500	7561500
O08705	O08705	Sodium/bile acid cotransporter	Slc10a1	sp|O08705|NTCP_MOUSE Sodium/bile acid cotransporter OS=Mus musculus OX=10090 GN=Slc10a1 PE=1 SV=1	1	4032800	7012800	7112600	7457500	7894800	6687800	29489000	5624600	7107100	7849300	7091500	12572000	7197600	6839800	6781100	4622200	5626200	88641000	4750800	77846000	580933	17498000	15617000	5541200	15901000	5129500	7039500	5836800	55229000	17435000	8200600	8814100
O08715-2	O08715-2;O08715-5;O08715-3;O08715-6;O08715;O08715-4	A-kinase anchor protein 1, mitochondrial	Akap1	sp|O08715-2|AKAP1_MOUSE Isoform 1 of A-kinase anchor protein 1, mitochondrial OS=Mus musculus OX=10090 GN=Akap1;sp|O08715-5|AKAP1_MOUSE Isoform 5 of A-kinase anchor protein 1, mitochondrial OS=Mus musculus OX=10090 GN=Akap1;sp|O08715-3|AKAP1_MOUSE Isoform	1	490483	4258400	2525900	1770300	2306200	499532	3246200	319865	360188	2265100	336680	2668700	400566	2492000	409718	389028	3259100	4796800	2128400	4288500	580933	3366000	2505500	478808	3917600	344674	2856900	3135600	3366200	1437200	1881100	448316
O08797	O08797	SPI6	Serpinb9	tr|O08797|O08797_MOUSE SPI6 OS=Mus musculus OX=10090 GN=Serpinb9 PE=1 SV=1	1	490483	1276900	396905	964210	1428400	2014500	1554500	1499700	360188	350936	1390600	1924100	974840	376107	409718	389028	342233	2082700	1735100	2057300	580933	385656	323890	478808	466503	344674	2004900	415610	620123	330431	325998	448316
O08966	O08966	Solute carrier family 22 member 1	Slc22a1	sp|O08966|S22A1_MOUSE Solute carrier family 22 member 1 OS=Mus musculus OX=10090 GN=Slc22a1 PE=1 SV=2	5	490483	430182	396905	356080	6012100	3649000	9152000	319865	8150400	350936	336680	6823900	400566	376107	409718	389028	342233	36360000	312879	31339000	580933	385656	323890	478808	466503	344674	451250	415610	24006000	330431	325998	448316
O09110-2	O09110-2;O09110	Dual specificity mitogen-activated protein kinase kinase 3	Map2k3	sp|O09110-2|MP2K3_MOUSE Isoform 1 of Dual specificity mitogen-activated protein kinase kinase 3 OS=Mus musculus OX=10090 GN=Map2k3;sp|O09110|MP2K3_MOUSE Dual specificity mitogen-activated protein kinase kinase 3 OS=Mus musculus OX=10090 GN=Map2k3 PE=1 SV=2	2	490483	430182	1486300	1058600	346898	499532	2775100	319865	810100	1004500	336680	361612	400566	376107	409718	389028	342233	8992500	312879	6453900	580933	1072700	1514900	478808	466503	344674	451250	415610	5977100	1448800	325998	448316
O09111	O09111	NADH dehydrogenase [ubiquinone] 1 beta subcomplex subunit 11, mitochondrial	Ndufb11	sp|O09111|NDUBB_MOUSE NADH dehydrogenase [ubiquinone] 1 beta subcomplex subunit 11, mitochondrial OS=Mus musculus OX=10090 GN=Ndufb11 PE=1 SV=2	1	490483	430182	396905	356080	346898	499532	560352	319865	360188	350936	336680	361612	400566	376107	409718	389028	342233	747486	312879	746728	580933	385656	323890	478808	466503	344674	451250	415610	620123	330431	325998	448316
O09158	O09158;D3Z707;D6RJM4;D3Z2W7;D3YYZ0;G3UX95	Cytochrome P450 3A25	Cyp3a25	sp|O09158|CP3AP_MOUSE Cytochrome P450 3A25 OS=Mus musculus OX=10090 GN=Cyp3a25 PE=1 SV=1	7	490483	430182	396905	356080	3353700	499532	12240000	3670200	360188	4462400	4916100	5769500	12546000	4777000	409718	389028	3084900	88359000	312879	70828000	18818000	4644700	8720600	478808	18347000	11115000	451250	6357800	65497000	330431	9675300	448316
O09165	O09165;E9Q489	Calsequestrin-1;Calsequestrin	Casq1	sp|O09165|CASQ1_MOUSE Calsequestrin-1 OS=Mus musculus OX=10090 GN=Casq1 PE=1 SV=3;tr|E9Q489|E9Q489_MOUSE Calsequestrin (Fragment) OS=Mus musculus OX=10090 GN=Casq1 PE=1 SV=1	4	490483	430182	396905	356080	14194000	13148000	560352	10886000	360188	350936	336680	361612	86841000	376107	409718	389028	342233	747486	312879	746728	580933	385656	323890	478808	46869000	344674	451250	415610	620123	330431	325998	448316
O35226	O35226;O35226-4;O35226-5	26S proteasome non-ATPase regulatory subunit 4	Psmd4	sp|O35226|PSMD4_MOUSE 26S proteasome non-ATPase regulatory subunit 4 OS=Mus musculus OX=10090 GN=Psmd4 PE=1 SV=1;sp|O35226-4|PSMD4_MOUSE Isoform Rpn10D of 26S proteasome non-ATPase regulatory subunit 4 OS=Mus musculus OX=10090 GN=Psmd4;sp|O35226-5|PSMD4_MO	1	490483	10301000	10909000	356080	346898	499532	560352	319865	360188	11689000	16068000	361612	400566	9200100	409718	389028	14408000	747486	312879	10803000	580933	9902600	16137000	478808	10739000	344674	451250	415610	620123	330431	325998	448316
O35295	O35295	Transcriptional activator protein Pur-beta	Purb	sp|O35295|PURB_MOUSE Transcriptional activator protein Pur-beta OS=Mus musculus OX=10090 GN=Purb PE=1 SV=3	3	490483	430182	396905	356080	346898	499532	6427500	319865	360188	350936	336680	3039500	400566	376107	409718	389028	342233	11663000	312879	10216000	580933	385656	323890	478808	466503	344674	451250	415610	6837300	330431	325998	448316
O35403	O35403;Q059N0;G5E904	Amine sulfotransferase;Sulfotransferase	Sult3a1	sp|O35403|ST3A1_MOUSE Amine sulfotransferase OS=Mus musculus OX=10090 GN=Sult3a1 PE=2 SV=1;tr|Q059N0|Q059N0_MOUSE Sulfotransferase OS=Mus musculus OX=10090 GN=Sult3a1 PE=1 SV=1	3	490483	2457400	396905	356080	11851000	499532	7011800	7291900	8349800	350936	6764700	361612	6865100	376107	10906000	389028	342233	747486	312879	746728	580933	385656	323890	478808	466503	344674	451250	415610	620123	330431	325998	448316
O35435	O35435;E9Q1V3;D3YZY5;F6TCT7	Dihydroorotate dehydrogenase (quinone), mitochondrial	Dhodh	sp|O35435|PYRD_MOUSE Dihydroorotate dehydrogenase (quinone), mitochondrial OS=Mus musculus OX=10090 GN=Dhodh PE=1 SV=2;tr|E9Q1V3|E9Q1V3_MOUSE Dihydroorotate dehydrogenase (quinone), mitochondrial OS=Mus musculus OX=10090 GN=Dhodh PE=1 SV=1;tr|D3YZY5|D3YZY5	4	4318800	5466600	4857900	5351700	5976800	4999000	5493700	4899200	4991900	350936	5155900	5998700	7449000	6416700	5239000	8599500	8881000	747486	312879	746728	8365000	3729300	6850100	7337200	466503	344674	6354200	3551800	620123	330431	6603900	448316
O35465	O35465;O35465-2	Peptidyl-prolyl cis-trans isomerase FKBP8	Fkbp8	sp|O35465|FKBP8_MOUSE Peptidyl-prolyl cis-trans isomerase FKBP8 OS=Mus musculus OX=10090 GN=Fkbp8 PE=1 SV=2;sp|O35465-2|FKBP8_MOUSE Isoform 2 of Peptidyl-prolyl cis-trans isomerase FKBP8 OS=Mus musculus OX=10090 GN=Fkbp8	1	2754600	3267500	3418200	356080	3253000	499532	4618300	1889200	3398100	3457100	4056100	2750900	2771500	2480200	4180400	1983200	342233	6082600	2942800	7410900	2626400	3920500	3443000	2269900	3808900	2524000	3913800	4071800	6549100	2905800	2342500	3906300
O35598	O35598;E9PYF2	Disintegrin and metalloproteinase domain-containing protein 10	Adam10	sp|O35598|ADA10_MOUSE Disintegrin and metalloproteinase domain-containing protein 10 OS=Mus musculus OX=10090 GN=Adam10 PE=1 SV=2;tr|E9PYF2|E9PYF2_MOUSE Disintegrin and metalloproteinase domain-containing protein 10 OS=Mus musculus OX=10090 GN=Adam10 PE=1	3	13886000	11136000	9825600	10772000	13696000	14545000	11537000	10495000	360188	9057000	13400000	10220000	400566	12422000	10830000	12357000	10852000	18570000	6810600	9746600	580933	8469500	10762000	10910000	11677000	13286000	451250	16277000	12321000	8244700	8597400	7853700
O35623	O35623	BET1 homolog	Bet1	sp|O35623|BET1_MOUSE BET1 homolog OS=Mus musculus OX=10090 GN=Bet1 PE=1 SV=1	2	6578200	9206700	8515300	9925200	10371000	499532	9706400	319865	10485000	8247500	9921000	8658600	10720000	376107	10758000	9993600	13611000	13722000	21183000	13483000	580933	9947200	12806000	10501000	8524900	9689900	16146000	11141000	11803000	10837000	18187000	12514000
O35728	O35728;A0A087WS15	Cytochrome P450 4A14	Cyp4a14	sp|O35728|CP4AE_MOUSE Cytochrome P450 4A14 OS=Mus musculus OX=10090 GN=Cyp4a14 PE=1 SV=1	16	490483	8999400	1954300	5515800	8368400	499532	29348000	2373600	1680400	8180200	4396000	4939600	8952900	15541000	409718	389028	1387200	227410000	4021700	86245000	580933	3865300	323890	478808	716910	344674	2868300	415610	46202000	3553000	4591800	448316
O54692	O54692	Centromere/kinetochore protein zw10 homolog	Zw10	sp|O54692|ZW10_MOUSE Centromere/kinetochore protein zw10 homolog OS=Mus musculus OX=10090 GN=Zw10 PE=1 SV=3	1	490483	430182	396905	356080	346898	499532	560352	319865	360188	350936	336680	361612	400566	376107	409718	389028	342233	7940200	312879	8415500	580933	385656	323890	478808	466503	344674	451250	415610	7037400	330431	325998	448316
O54724	O54724	Polymerase I and transcript release factor	Ptrf	sp|O54724|CAVN1_MOUSE Caveolae-associated protein 1 OS=Mus musculus OX=10090 GN=Cavin1 PE=1 SV=1	1	490483	430182	396905	356080	14169000	19366000	560352	319865	360188	350936	336680	361612	12219000	376107	409718	389028	342233	747486	312879	5792300	580933	385656	323890	478808	9888900	344674	451250	415610	620123	330431	325998	448316
O54749	O54749;G3UXT0;O54750	Cytochrome P450 2J5	Cyp2j5	sp|O54749|CP2J5_MOUSE Cytochrome P450 2J5 OS=Mus musculus OX=10090 GN=Cyp2j5 PE=1 SV=1	17	138250	272740	207240	322010	187090	184690	7846900	319865	240270	350936	319950	361612	283740	245670	409718	389028	342233	71842000	40787	88838000	580933	93683	1049500	478808	1535400	344674	451250	187370	102010000	480760	1644100	448316
O54890	O54890	Integrin beta-3	Itgb3	sp|O54890|ITB3_MOUSE Integrin beta-3 OS=Mus musculus OX=10090 GN=Itgb3 PE=1 SV=2	1	2203300	430182	2019400	356080	3117500	1862100	560352	319865	360188	2917000	336680	361612	400566	2718000	3327100	3208800	342233	747486	1276000	746728	580933	385656	323890	478808	1984300	1614600	451250	2839100	620123	330431	1153800	448316
O54909	O54909;D6RFQ4;Q6PHA1	Retinol dehydrogenase 16	Rdh16	sp|O54909|RDH16_MOUSE Retinol dehydrogenase 16 OS=Mus musculus OX=10090 GN=Rdh16 PE=1 SV=1	3	23007000	49180000	26264000	38773000	26365000	11517000	26541000	22898000	25460000	41810000	25532000	24290000	31040000	20943000	16158000	389028	26069000	39518000	32772000	37350000	17755000	14469000	8328600	13984000	9393000	344674	14900000	6918300	26047000	19838000	20373000	14934000
O54950	O54950;A0A2R8W6Y3;A0A2R8VHU2	5-AMP-activated protein kinase subunit gamma-1	Prkag1	sp|O54950|AAKG1_MOUSE 5-AMP-activated protein kinase subunit gamma-1 OS=Mus musculus OX=10090 GN=Prkag1 PE=1 SV=2;tr|A0A2R8W6Y3|A0A2R8W6Y3_MOUSE 5-AMP-activated protein kinase subunit gamma-1 (Fragment) OS=Mus musculus OX=10090 GN=Prkag1 PE=1 SV=1;tr|A0A	4	490483	430182	396905	356080	346898	499532	2063700	319865	360188	350936	336680	361612	400566	376107	409718	389028	342233	24503000	312879	8800800	580933	385656	323890	478808	466503	344674	451250	415610	12096000	330431	325998	448316
O54984	O54984	ATPase Asna1	Asna1	sp|O54984|GET3_MOUSE ATPase GET3 OS=Mus musculus OX=10090 GN=Get3 PE=1 SV=2	1	490483	430182	16525000	8129700	346898	5950000	560352	319865	7749600	350936	336680	361612	400566	9798900	15328000	389028	342233	15095000	312879	12555000	580933	385656	14216000	478808	9913400	344674	451250	415610	18204000	10057000	325998	9070900
O55143-2	O55143-2;O55143	Sarcoplasmic/endoplasmic reticulum calcium ATPase 2	Atp2a2	sp|O55143-2|AT2A2_MOUSE Isoform 2 of Sarcoplasmic/endoplasmic reticulum calcium ATPase 2 OS=Mus musculus OX=10090 GN=Atp2a2;sp|O55143|AT2A2_MOUSE Sarcoplasmic/endoplasmic reticulum calcium ATPase 2 OS=Mus musculus OX=10090 GN=Atp2a2 PE=1 SV=2	10	490483	901970	396905	356080	444200	499532	2060800	319865	360188	350936	336680	361612	400566	376107	580160	389028	342233	43454000	312879	23821000	580933	385656	323890	1111200	1689400	5529900	451250	415610	15743000	330431	1287100	448316
O55222	O55222;A0A1B0GRF6;D3YZA5	Integrin-linked protein kinase	Ilk	sp|O55222|ILK_MOUSE Integrin-linked protein kinase OS=Mus musculus OX=10090 GN=Ilk PE=1 SV=2	6	490483	430182	396905	356080	346898	499532	3842900	319865	360188	350936	336680	361612	400566	376107	409718	808500	342233	20454000	312879	10481000	580933	385656	323890	746920	1053500	344674	451250	415610	29665000	330431	1765800	448316
O55239	O55239;D3YX59	Nicotinamide N-methyltransferase	Nnmt	sp|O55239|NNMT_MOUSE Nicotinamide N-methyltransferase OS=Mus musculus OX=10090 GN=Nnmt PE=1 SV=1	3	12524000	430182	9143000	8187600	10626000	20229000	14423000	17339000	10299000	8994300	8455900	361612	16220000	8185700	13205000	19455000	7124200	16437000	9711100	18110000	580933	7739000	18639000	478808	16543000	36763000	11184000	10553000	26997000	10313000	12500000	6805800
O70152	O70152;F8WII3;A2BDX2	Dolichol-phosphate mannosyltransferase subunit 1	Dpm1	sp|O70152|DPM1_MOUSE Dolichol-phosphate mannosyltransferase subunit 1 OS=Mus musculus OX=10090 GN=Dpm1 PE=1 SV=1;tr|F8WII3|F8WII3_MOUSE Dolichol-phosphate mannose synthase subunit 1 (Fragment) OS=Mus musculus OX=10090 GN=Dpm1 PE=1 SV=1;tr|A2BDX2|A2BDX2_MOU	4	490483	430182	396905	356080	346898	499532	560352	319865	360188	350936	336680	361612	400566	376107	409718	389028	342233	5201000	312879	4210400	580933	385656	323890	478808	466503	344674	451250	415610	5176500	330431	325998	448316
O70250	O70250	Phosphoglycerate mutase 2	Pgam2	sp|O70250|PGAM2_MOUSE Phosphoglycerate mutase 2 OS=Mus musculus OX=10090 GN=Pgam2 PE=1 SV=3	9	1239200	430182	396905	356080	23124000	17216000	1835800	5122000	360188	1916100	336680	361612	126810000	376107	3037300	10436000	342233	747486	312879	746728	4518400	385656	323890	1599100	148200000	344674	451250	415610	620123	330431	583700	448316
O70274	O70274	Protein tyrosine phosphatase type IVA 2	Ptp4a2	sp|O70274|TP4A2_MOUSE Protein tyrosine phosphatase type IVA 2 OS=Mus musculus OX=10090 GN=Ptp4a2 PE=1 SV=1	5	6826700	9210400	5188300	356080	9610600	499532	3194400	5798000	9368500	350936	11966000	10104000	400566	376107	2827300	8783900	342233	747486	8561900	746728	6444500	6041800	5650700	8679300	6800700	6305100	6187200	8406400	5801300	330431	325998	10581000
O70503	O70503;O70503-2	Very-long-chain 3-oxoacyl-CoA reductase	Hsd17b12	sp|O70503|DHB12_MOUSE Very-long-chain 3-oxoacyl-CoA reductase OS=Mus musculus OX=10090 GN=Hsd17b12 PE=1 SV=1;sp|O70503-2|DHB12_MOUSE Isoform 2 of Very-long-chain 3-oxoacyl-CoA reductase OS=Mus musculus OX=10090 GN=Hsd17b12	9	490483	2798500	2460800	1874800	2216800	499532	16523000	1016400	360188	2678400	1728400	361612	400566	376107	812300	323180	2164400	167490000	1903500	109220000	519080	2820300	5504200	459480	6230900	425320	451250	515150	114360000	5296200	5583900	448316
O70572	O70572;D6RGM4	Sphingomyelin phosphodiesterase 2	Smpd2	sp|O70572|NSMA_MOUSE Sphingomyelin phosphodiesterase 2 OS=Mus musculus OX=10090 GN=Smpd2 PE=1 SV=1;tr|D6RGM4|D6RGM4_MOUSE Sphingomyelin phosphodiesterase 2 OS=Mus musculus OX=10090 GN=Smpd2 PE=1 SV=1	2	490483	430182	396905	5532700	346898	6524000	560352	319865	6318000	350936	336680	361612	400566	376107	409718	389028	342233	4552900	312879	6340600	580933	9954700	4807800	478808	466503	344674	6827700	415610	8296300	330431	325998	7679200
O88271	O88271	Craniofacial development protein 1	Cfdp1	sp|O88271|CFDP1_MOUSE Craniofacial development protein 1 OS=Mus musculus OX=10090 GN=Cfdp1 PE=1 SV=1	3	9735600	430182	12431000	9280900	346898	12046000	10738000	12842000	12630000	10827000	11680000	5270000	9098800	376107	12562000	12656000	9826600	4306700	6803800	746728	580933	385656	323890	478808	466503	10512000	8789600	415610	620123	330431	325998	9861800
O88455	O88455;A0A140LIT2;D3Z7G1	7-dehydrocholesterol reductase	Dhcr7	sp|O88455|DHCR7_MOUSE 7-dehydrocholesterol reductase OS=Mus musculus OX=10090 GN=Dhcr7 PE=1 SV=1;tr|A0A140LIT2|A0A140LIT2_MOUSE 7-dehydrocholesterol reductase OS=Mus musculus OX=10090 GN=Dhcr7 PE=1 SV=1	3	490483	430182	396905	356080	346898	499532	7554400	319865	360188	350936	336680	361612	400566	376107	5762400	389028	342233	16046000	6559000	21432000	580933	385656	323890	5555800	466503	344674	451250	415610	8889100	330431	325998	448316
O88544	O88544;F6QTS1;D3YV99;D3Z1R9	COP9 signalosome complex subunit 4	Cops4	sp|O88544|CSN4_MOUSE COP9 signalosome complex subunit 4 OS=Mus musculus OX=10090 GN=Cops4 PE=1 SV=1;tr|F6QTS1|F6QTS1_MOUSE COP9 signalosome complex subunit 4 (Fragment) OS=Mus musculus OX=10090 GN=Cops4 PE=1 SV=1;tr|D3YV99|D3YV99_MOUSE COP9 signalosome com	6	490483	430182	8612500	2318400	346898	499532	4660000	5915300	4428600	5502700	1931700	4137400	4071200	5054000	409718	2042800	4892100	33450000	5046100	13056000	2996200	4684600	9958600	478808	8263000	7882100	2376700	415610	39765000	7757700	5662600	2251000
O88630	O88630	Golgi SNAP receptor complex member 1	Gosr1	sp|O88630|GOSR1_MOUSE Golgi SNAP receptor complex member 1 OS=Mus musculus OX=10090 GN=Gosr1 PE=1 SV=2	2	3529800	2700800	2685200	2494400	2096000	2731100	2728100	2568800	360188	2312800	3022500	3002700	2417500	2728200	2759600	3442100	3586800	2383100	312879	2993900	580933	2854400	323890	3330100	2986400	3217600	451250	2934400	2587900	330431	3364700	448316
O88851	O88851	Putative hydrolase RBBP9	Rbbp9	sp|O88851|RBBP9_MOUSE Putative hydrolase RBBP9 OS=Mus musculus OX=10090 GN=Rbbp9 PE=1 SV=2	2	490483	430182	7911100	7226100	346898	499532	11996000	319865	7727300	350936	336680	361612	8275600	376107	409718	389028	342233	20129000	312879	22550000	580933	8982800	323890	478808	5096900	344674	451250	415610	16177000	330431	325998	9253100
O88908	O88908;F6SMH4	Sterol O-acyltransferase 2	Soat2	sp|O88908|SOAT2_MOUSE Sterol O-acyltransferase 2 OS=Mus musculus OX=10090 GN=Soat2 PE=1 SV=2;tr|F6SMH4|F6SMH4_MOUSE Sterol O-acyltransferase 2 (Fragment) OS=Mus musculus OX=10090 GN=Soat2 PE=1 SV=1	5	490483	430182	396905	356080	346898	499532	560352	319865	360188	350936	336680	361612	400566	376107	409718	389028	342233	15927000	312879	14377000	580933	385656	323890	478808	466503	1630900	451250	415610	1892900	330431	325998	448316
O88952	O88952	Protein lin-7 homolog C	Lin7c	sp|O88952|LIN7C_MOUSE Protein lin-7 homolog C OS=Mus musculus OX=10090 GN=Lin7c PE=1 SV=2	2	490483	430182	15447000	13915000	14589000	21087000	12906000	18958000	15750000	12080000	18699000	13637000	14065000	16912000	409718	16486000	20335000	12069000	18066000	13831000	580933	20251000	14145000	15392000	466503	16786000	19679000	17310000	11164000	18548000	24815000	24898000
O88967	O88967	ATP-dependent zinc metalloprotease YME1L1	Yme1l1	sp|O88967|YMEL1_MOUSE ATP-dependent zinc metalloprotease YME1L1 OS=Mus musculus OX=10090 GN=Yme1l1 PE=1 SV=1	1	490483	430182	396905	356080	346898	499532	560352	319865	360188	350936	336680	361612	400566	376107	409718	389028	342233	747486	312879	746728	580933	385656	323890	478808	466503	344674	451250	6374000	14802000	330431	325998	448316
O89051	O89051;A0A2I3BPW7	Integral membrane protein 2B;BRI2, membrane form;BRI2 intracellular domain;BRI2C, soluble form;Bri23 peptide	Itm2b	sp|O89051|ITM2B_MOUSE Integral membrane protein 2B OS=Mus musculus OX=10090 GN=Itm2b PE=1 SV=1;tr|A0A2I3BPW7|A0A2I3BPW7_MOUSE Integral membrane protein 2 (Fragment) OS=Mus musculus OX=10090 GN=Itm2b PE=1 SV=1	2	490483	2983400	2228700	1677900	346898	499532	560352	319865	1751600	350936	336680	361612	400566	376107	409718	389028	342233	5773200	312879	3225600	580933	385656	323890	478808	1799100	344674	451250	1287600	3026600	1418200	325998	2200800
P00397	P00397	Cytochrome c oxidase subunit 1	Mtco1	sp|P00397|COX1_MOUSE Cytochrome c oxidase subunit 1 OS=Mus musculus OX=10090 GN=Mtco1 PE=1 SV=2	3	490483	430182	4638300	356080	346898	499532	9646100	319865	360188	4198400	5897800	361612	400566	3850500	409718	389028	342233	40834000	312879	59101000	580933	385656	323890	478808	466503	344674	451250	415610	25907000	330431	5216700	5376300
P00416	P00416	Cytochrome c oxidase subunit 3	mt-Co3	sp|P00416|COX3_MOUSE Cytochrome c oxidase subunit 3 OS=Mus musculus OX=10090 GN=mt-Co3 PE=1 SV=2	1	391430	878240	1214800	904340	1029900	510570	2786200	380380	1024300	914880	648160	509970	545490	699860	746920	432390	820300	14998000	615540	12744000	145650	1453200	892550	714040	1012300	309040	456870	634450	9274500	867180	1633300	1363600
P00687	P00687;D3YYQ5;CON__Q3MHH8;G3UXY7	Alpha-amylase 1;Alpha-amylase	Amy1	sp|P00687|AMY1_MOUSE Alpha-amylase 1 OS=Mus musculus OX=10090 GN=Amy1 PE=1 SV=2;tr|D3YYQ5|D3YYQ5_MOUSE Alpha-amylase (Fragment) OS=Mus musculus OX=10090 GN=Amy1 PE=1 SV=2	2	7220500	4584000	4205900	4476700	346898	24882000	560352	6314000	360188	6942700	336680	4717900	6422400	30291000	409718	2879500	4927600	4853600	6975400	3629400	580933	5214900	5541600	478808	466503	4844400	12594000	6592300	620123	330431	325998	448316
P00688	P00688;E9PV85	Pancreatic alpha-amylase	Amy2	sp|P00688|AMYP_MOUSE Pancreatic alpha-amylase OS=Mus musculus OX=10090 GN=Amy2 PE=1 SV=2	16	282600000	1512400	396905	5335700	346898	140900000	560352	31621000	951150	61589000	336680	361612	42400000	277270000	409718	389028	342233	747486	1203400	746728	434700	385656	983470	1970000	466503	12864000	710710	415610	620123	330431	364310	448316
P01592	P01592	Immunoglobulin J chain	Igj	sp|P01592|IGJ_MOUSE Immunoglobulin J chain OS=Mus musculus OX=10090 GN=Jchain PE=1 SV=4	1	11363000	430182	396905	4672900	7752800	499532	560352	319865	360188	5256400	336680	361612	400566	376107	409718	6261400	342233	747486	312879	4959000	580933	385656	323890	478808	466503	9998400	451250	415610	620123	330431	325998	448316
P01626	P01626	Immunoglobulinkappa chain V-II region MOPC 167		sp|P01626|KV2A1_MOUSE Ig kappa chain V-II region MOPC 167 OS=Mus musculus OX=10090 PE=1 SV=1	1	490483	430182	396905	356080	346898	499532	560352	319865	360188	350936	336680	361612	400566	376107	409718	389028	342233	747486	312879	746728	580933	385656	323890	478808	466503	344674	451250	415610	620123	330431	325998	448316
P01643	P01643;A0A075B5L0;A0A075B5L1	Immunoglobulinkappa chain V-V region MOPC 173	Igkv10-95;Igkv10-94	sp|P01643|KV5AA_MOUSE Ig kappa chain V-V region MOPC 173 OS=Mus musculus OX=10090 PE=1 SV=1;tr|A0A075B5L0|A0A075B5L0_MOUSE Immunoglobulin kappa variable 10-95 OS=Mus musculus OX=10090 GN=Igkv10-95 PE=4 SV=7;tr|A0A075B5L1|A0A075B5L1_MOUSE Immunoglobulin kap	1	8720600	430182	396905	11565000	346898	13063000	560352	319865	360188	350936	336680	361612	20967000	376107	409718	389028	342233	747486	312879	746728	580933	385656	323890	478808	466503	344674	5894800	415610	620123	330431	325998	448316
P01645	P01645;P01644;A0A140T8M1;P01646;P01647;P04946;P01648	Immunoglobulinkappa chain V-V region HP 93G7;Immunoglobulinkappa chain V-V region HP R16.7;Immunoglobulinkappa chain V-V region HP 123E6;Immunoglobulinkappa chain V-V region HP 124E1		sp|P01645|KV5AC_MOUSE Ig kappa chain V-V region HP 93G7 OS=Mus musculus OX=10090 PE=1 SV=1;sp|P01644|KV5AB_MOUSE Ig kappa chain V-V region HP R16.7 OS=Mus musculus OX=10090 PE=1 SV=1;tr|A0A140T8M1|A0A140T8M1_MOUSE Immunoglobulin kappa variable 10-96 (Fragm	3	14601000	21207000	278000000	52401000	14393000	24996000	560352	319865	2907700	30679000	4636700	330480000	8151700	57496000	409718	3236500	10347000	4191400	312879	746728	580933	385656	2703700	478808	4902900	431520000	15216000	4469500	620123	330431	325998	448316
P01654	P01654;P01656;P01655;A0A075B5P0;P03977	Immunoglobulinkappa chain V-III region PC 2880/PC 1229;Immunoglobulinkappa chain V-III region MOPC 70;Immunoglobulinkappa chain V-III region PC 7132;Immunoglobulinkappa chain V-III region 50S10.1	Igkv3-2	sp|P01654|KV3A1_MOUSE Ig kappa chain V-III region PC 2880/PC 1229 OS=Mus musculus OX=10090 PE=1 SV=1;sp|P01656|KV3A3_MOUSE Ig kappa chain V-III region MOPC 70 OS=Mus musculus OX=10090 PE=1 SV=1;sp|P01655|KV3A2_MOUSE Ig kappa chain V-III region PC 7132 OS=M	5	260880000	85449000	56768000	78315000	40756000	157040000	4608200	45267000	360188	49933000	68446000	40260000	31377000	55358000	409718	36704000	30631000	12407000	312879	746728	580933	385656	323890	478808	56297000	82722000	22102000	57292000	11692000	330431	14314000	448316
P01668	P01668;P01666;P01665;P01664;A0A140T8Q4;A0A140T8Q0	Immunoglobulinkappa chain V-III region PC 7210;Immunoglobulinkappa chain V-III region PC 7183;Immunoglobulinkappa chain V-III region PC 7043;Immunoglobulinkappa chain V-III region CBPC 101		sp|P01668|KV3AG_MOUSE Ig kappa chain V-III region PC 7210 OS=Mus musculus OX=10090 PE=1 SV=1;sp|P01666|KV3AE_MOUSE Ig kappa chain V-III region PC 7183 OS=Mus musculus OX=10090 PE=1 SV=1;sp|P01665|KV3AD_MOUSE Ig kappa chain V-III region PC 7043 OS=Mus muscu	1	28864000	12527000	27575000	27472000	346898	53176000	7673800	319865	360188	25105000	40154000	37906000	400566	376107	409718	45704000	19116000	13597000	14214000	13364000	580933	385656	323890	478808	34803000	26861000	22384000	36272000	7315500	330431	9630500	448316
P01672	P01672;P01671;P01670;A0A075B5N8;A0A140T8P0;A0A0G2JGN0;P01663;P01662;P01661	Immunoglobulinkappa chain V-III region PC 7940;Immunoglobulinkappa chain V-III region PC 7175;Immunoglobulinkappa chain V-III region PC 6684;Immunoglobulinkappa chain V-III region PC 4050;Immunoglobulinkappa chain V-III region ABPC 22/PC 9245;Immunoglobulinkappa chain V-III region MOPC 63	Igkv3-10	sp|P01672|KV3AK_MOUSE Ig kappa chain V-III region PC 7940 OS=Mus musculus OX=10090 PE=1 SV=1;sp|P01671|KV3AJ_MOUSE Ig kappa chain V-III region PC 7175 OS=Mus musculus OX=10090 PE=1 SV=1;sp|P01670|KV3AI_MOUSE Ig kappa chain V-III region PC 6684 OS=Mus muscu	1	23634000	430182	396905	356080	21859000	14893000	560352	319865	360188	350936	18895000	17082000	400566	376107	409718	389028	342233	747486	312879	746728	580933	385656	323890	478808	466503	344674	451250	415610	620123	330431	325998	448316
P03899	P03899	NADH-ubiquinone oxidoreductase chain 3	Mtnd3	sp|P03899|NU3M_MOUSE NADH-ubiquinone oxidoreductase chain 3 OS=Mus musculus OX=10090 GN=Mtnd3 PE=1 SV=3	1	490483	430182	396905	356080	346898	499532	560352	319865	360188	350936	336680	361612	400566	376107	409718	389028	342233	17831000	312879	14230000	580933	385656	3908100	478808	466503	344674	451250	415610	6597000	330431	325998	4145000
P03911	P03911	NADH-ubiquinone oxidoreductase chain 4	Mtnd4	sp|P03911|NU4M_MOUSE NADH-ubiquinone oxidoreductase chain 4 OS=Mus musculus OX=10090 GN=Mtnd4 PE=1 SV=1	3	490483	430182	396905	1216800	346898	499532	2730000	319865	360188	350936	336680	361612	738050	376107	409718	389028	342233	2968800	1123600	15926000	580933	1465700	2982000	897540	466503	344674	451250	415610	15248000	2171700	3423100	448316
P03921	P03921	NADH-ubiquinone oxidoreductase chain 5	Mtnd5	sp|P03921|NU5M_MOUSE NADH-ubiquinone oxidoreductase chain 5 OS=Mus musculus OX=10090 GN=Mtnd5 PE=1 SV=3	1	490483	430182	396905	356080	346898	499532	2618000	319865	360188	350936	336680	361612	400566	376107	409718	389028	342233	29745000	312879	28533000	580933	385656	323890	478808	466503	344674	451250	415610	20533000	2800300	4916200	448316
P04247	P04247;A0A2R8W6F8;A0A2R8VK58	Myoglobin	Mb	sp|P04247|MYG_MOUSE Myoglobin OS=Mus musculus OX=10090 GN=Mb PE=1 SV=3;tr|A0A2R8W6F8|A0A2R8W6F8_MOUSE Myoglobin OS=Mus musculus OX=10090 GN=Mb PE=1 SV=1	10	490483	430182	396905	356080	318470000	83873000	560352	80354000	360188	350936	336680	361612	516540000	376107	409718	389028	1060200	747486	312879	746728	580933	385656	323890	478808	563620000	880220	591480	415610	620123	330431	325998	448316
P04627	P04627;B1AUP0;B1AUN8;E9Q0P8	Serine/threonine-protein kinase A-Raf	Araf	sp|P04627|ARAF_MOUSE Serine/threonine-protein kinase A-Raf OS=Mus musculus OX=10090 GN=Araf PE=1 SV=2;tr|B1AUP0|B1AUP0_MOUSE Serine/threonine-protein kinase A-Raf (Fragment) OS=Mus musculus OX=10090 GN=Araf PE=1 SV=2	4	490483	430182	396905	356080	346898	499532	560352	319865	360188	350936	336680	361612	3682900	376107	409718	389028	342233	6671300	312879	5130500	580933	385656	323890	478808	466503	344674	451250	415610	6610600	2668900	325998	448316
P04919-2	P04919-2;P04919	Band 3 anion transport protein	Slc4a1	sp|P04919-2|B3AT_MOUSE Isoform 2 of Band 3 anion transport protein OS=Mus musculus OX=10090 GN=Slc4a1;sp|P04919|B3AT_MOUSE Band 3 anion transport protein OS=Mus musculus OX=10090 GN=Slc4a1 PE=1 SV=1	4	490483	430182	396905	3781000	346898	6639200	560352	4133900	360188	6973300	336680	361612	9686300	8056800	409718	389028	5130200	30699000	8387100	27420000	580933	5081800	323890	478808	9313300	11316000	8089600	6442200	20873000	5209200	325998	448316
P05063	P05063	Fructose-bisphosphate aldolase C	Aldoc	sp|P05063|ALDOC_MOUSE Fructose-bisphosphate aldolase C OS=Mus musculus OX=10090 GN=Aldoc PE=1 SV=4	4	2843000	5772600	2251700	2845900	346898	2448200	4409800	3312300	360188	1761900	4556500	361612	400566	6247800	4597300	4560100	3649900	5247500	312879	3141700	580933	3102100	8953300	11320000	8783600	9439800	10230000	6464700	6011500	6274500	7572900	7222600
P05132-2	P05132-2;P05132	cAMP-dependent protein kinase catalytic subunit alpha	Prkaca	sp|P05132-2|KAPCA_MOUSE Isoform 2 of cAMP-dependent protein kinase catalytic subunit alpha OS=Mus musculus OX=10090 GN=Prkaca;sp|P05132|KAPCA_MOUSE cAMP-dependent protein kinase catalytic subunit alpha OS=Mus musculus OX=10090 GN=Prkaca PE=1 SV=3	1	490483	430182	396905	356080	346898	499532	8140900	319865	360188	3072200	336680	361612	400566	376107	409718	389028	342233	20080000	312879	17727000	580933	385656	323890	478808	3549100	344674	451250	1581100	19375000	3453400	325998	448316
P05977	P05977;E9PWG4;P05977-2;E0CZ30;A0A087WRZ7	Myosin light chain 1/3, skeletal muscle isoform	Myl1	sp|P05977|MYL1_MOUSE Myosin light chain 1/3, skeletal muscle isoform OS=Mus musculus OX=10090 GN=Myl1 PE=1 SV=2;tr|E9PWG4|E9PWG4_MOUSE Myosin light chain 1/3, skeletal muscle isoform OS=Mus musculus OX=10090 GN=Myl1 PE=1 SV=1;sp|P05977-2|MYL1_MOUSE Isoform	9	490483	430182	396905	356080	16608000	14909000	560352	4505100	360188	350936	336680	361612	237290000	376107	409718	389028	342233	747486	1854100	746728	580933	385656	323890	478808	125340000	1924700	451250	415610	1502500	330431	325998	448316
P06328	P06328;P01754;P01753;A0A075B5Y1;A0A075B5X0;A0A075B5W2;A0A0G2JGK2;A0A0A6YXE0;A0A0A6YXC3;A0A075B5X3;A0A075B5W3;A0A075B5T7;P01750;P01748	Immunoglobulinheavy chain V region VH558 B4;Immunoglobulinheavy chain V region 1-62-3;Immunoglobulinheavy chain V region 186-1;Immunoglobulinheavy chain V region 102;Immunoglobulinheavy chain V region 23	Ighv1-62-3;Ighv1-74;Ighv1-59;Ighv1-52;Ighv1-64;Ighv1-53;Ighv1-7	sp|P06328|HVM49_MOUSE Ig heavy chain V region 1-72 OS=Mus musculus OX=10090 GN=Ighv1-72 PE=1 SV=2;sp|P01754|HVM10_MOUSE Ig heavy chain V region 1-62-3 OS=Mus musculus OX=10090 GN=Ighv1-62-3 PE=4 SV=2;sp|P01753|HVM09_MOUSE Ig heavy chain V region 186-1 OS=M	2	44551000	5140500	30273000	339510000	5895000	47211000	6884500	6843300	3776000	5725300	17437000	88007000	400566	376107	409718	3783700	5375600	747486	5634700	3520800	4429300	3950400	323890	478808	5946500	7122000	5557400	7546300	620123	2407200	4066400	448316
P07146	P07146	Anionic trypsin-2	Prss2	sp|P07146|TRY2_MOUSE Anionic trypsin-2 OS=Mus musculus OX=10090 GN=Prss2 PE=1 SV=1	1	87124000	13367000	396905	356080	346898	40904000	560352	22655000	360188	28604000	336680	361612	18256000	35911000	409718	389028	342233	747486	312879	746728	580933	385656	323890	478808	466503	344674	451250	415610	620123	330431	325998	448316
P07310	P07310	Creatine kinase M-type	Ckm	sp|P07310|KCRM_MOUSE Creatine kinase M-type OS=Mus musculus OX=10090 GN=Ckm PE=1 SV=1	17	490483	430182	396905	356080	171410000	84200000	560352	146930000	99307	350936	38555	49190	863500000	376107	409718	38747	342233	747486	312879	746728	580933	66553	86490	122890	465960000	432940	451250	415610	84723	330431	325998	448316
P07742	P07742	Ribonucleoside-diphosphate reductase large subunit	Rrm1	sp|P07742|RIR1_MOUSE Ribonucleoside-diphosphate reductase large subunit OS=Mus musculus OX=10090 GN=Rrm1 PE=1 SV=2	1	3542200	2966500	3453400	2021500	3154600	3655100	3610200	3696100	3029300	2663400	3359300	4973100	2400100	2828500	409718	4233700	3068200	747486	3302500	2411400	4518000	2492600	4736400	4053100	466503	3493100	451250	2025300	2519700	330431	3348400	2953600
P08032	P08032	Spectrin alpha chain, erythrocytic 1	Spta1	sp|P08032|SPTA1_MOUSE Spectrin alpha chain, erythrocytic 1 OS=Mus musculus OX=10090 GN=Spta1 PE=1 SV=3	3	3539300	430182	4775600	5145800	346898	4143500	5200100	319865	360188	4897300	336680	5054200	4454500	4491800	409718	389028	6571800	5160300	312879	4076500	580933	9035400	4814200	2914500	5852000	3703500	5607100	415610	6439300	4031100	4695400	448316
P08071	P08071;A0A0G2JDN0;A0A0G2JGN1;A0A0G2JFM6	Lactotransferrin	Ltf	sp|P08071|TRFL_MOUSE Lactotransferrin OS=Mus musculus OX=10090 GN=Ltf PE=1 SV=4	4	6552700	6416400	5787000	3728600	4656000	7066000	560352	319865	8333600	2791100	4124600	6362400	5916800	4360400	4563300	5383400	342233	747486	312879	746728	580933	5140200	3562000	478808	3866600	4811700	5050900	4448500	620123	330431	325998	448316
P08752	P08752;A0A0A6YWA9;B2RSH2	Guanine nucleotide-binding protein G(i) subunit alpha-2	Gnai2	sp|P08752|GNAI2_MOUSE Guanine nucleotide-binding protein G(i) subunit alpha-2 OS=Mus musculus OX=10090 GN=Gnai2 PE=1 SV=5;tr|A0A0A6YWA9|A0A0A6YWA9_MOUSE Guanine nucleotide-binding protein G(i) subunit alpha-2 (Fragment) OS=Mus musculus OX=10090 GN=Gnai2 PE	5	2537300	3007500	3279200	2930900	3081200	499532	7241600	319865	3540700	350936	336680	361612	2069300	376107	409718	389028	342233	14884000	312879	19211000	580933	385656	323890	478808	3563200	2742500	451250	415610	7498600	330431	325998	448316
P09542	P09542;A0A0G2JDW2;A0A0G2JDM3	Myosin light chain 3	Myl3	sp|P09542|MYL3_MOUSE Myosin light chain 3 OS=Mus musculus OX=10090 GN=Myl3 PE=1 SV=4;tr|A0A0G2JDW2|A0A0G2JDW2_MOUSE Myosin light chain 3 (Fragment) OS=Mus musculus OX=10090 GN=Myl3 PE=1 SV=1;tr|A0A0G2JDM3|A0A0G2JDM3_MOUSE Myosin light chain 3 OS=Mus muscul	2	490483	430182	396905	356080	346898	499532	560352	319865	360188	350936	336680	361612	9385700	376107	409718	389028	342233	747486	312879	746728	580933	385656	323890	478808	4136700	344674	451250	415610	620123	330431	3878300	448316
P09925	P09925;A0A0A6YVR9;A0A0R4J232;V9GXE6	Surfeit locus protein 1	Surf1	sp|P09925|SURF1_MOUSE Surfeit locus protein 1 OS=Mus musculus OX=10090 GN=Surf1 PE=1 SV=3;tr|A0A0A6YVR9|A0A0A6YVR9_MOUSE SURF1-like protein (Fragment) OS=Mus musculus OX=10090 GN=Surf1 PE=1 SV=1	3	10042000	12233000	396905	356080	346898	8855300	560352	319865	360188	10992000	336680	13796000	9764100	12315000	14968000	389028	342233	15543000	17837000	14653000	580933	11157000	14028000	10566000	13364000	12845000	10117000	415610	16554000	21276000	12331000	14847000
P0DJF2	P0DJF2	Protein PET117 homolog, mitochondrial	Pet117	sp|P0DJF2|PT117_MOUSE Protein PET117 homolog, mitochondrial OS=Mus musculus OX=10090 GN=Pet117 PE=3 SV=1	2	7698900	8766300	7839300	9303900	7895100	9942100	8012000	9192800	9187300	9508100	336680	8280400	9563400	7729400	7676800	8881500	342233	7019100	7414600	7695900	10143000	8599800	323890	9157300	8680700	9870700	9138800	8917100	10017000	8362700	9831000	8202100
P11404	P11404	Fatty acid-binding protein, heart	Fabp3	sp|P11404|FABPH_MOUSE Fatty acid-binding protein, heart OS=Mus musculus OX=10090 GN=Fabp3 PE=1 SV=5	5	490483	430182	396905	356080	101030000	18038000	560352	14691000	1166400	350936	336680	361612	162340000	376107	409718	389028	1833600	747486	312879	746728	580933	385656	323890	478808	143810000	344674	451250	415610	620123	330431	325998	448316
P11589	P11589	Major urinary protein 2	Mup2	sp|P11589|MUP2_MOUSE Major urinary protein 2 OS=Mus musculus OX=10090 GN=Mup2 PE=1 SV=1	1	30543000	49504000	48464000	50133000	83657000	59861000	56842000	78941000	78814000	50413000	65123000	62468000	88814000	48327000	124780000	64323000	239060000	140400000	175120000	142340000	489250000	309800000	311080000	514450000	370040000	208420000	305950000	423350000	177220000	320920000	220280000	391290000
P11930	P11930	Nucleoside diphosphate-linked moiety X motif 19, mitochondrial	Nudt19	sp|P11930|NUD19_MOUSE Nucleoside diphosphate-linked moiety X motif 19 OS=Mus musculus OX=10090 GN=Nudt19 PE=1 SV=2	9	490483	1106000	3263400	2115500	346898	499532	9496800	319865	1813800	350936	1716500	361612	400566	1431700	1308400	389028	342233	74122000	312879	73870000	580933	385656	3009800	1707500	4556100	344674	451250	415610	43412000	1161700	5271700	448316
P12790	P12790;O55071;E9Q593	Cytochrome P450 2B9	Cyp2b9	sp|P12790|CP2B9_MOUSE Cytochrome P450 2B9 OS=Mus musculus OX=10090 GN=Cyp2b9 PE=1 SV=2	7	3477900	11944000	7194500	10341000	8688100	9917400	37518000	7701300	10058000	7795000	3847100	6518000	9013600	6165900	409718	389028	3034400	42499000	1026900	40266000	810210	385656	323890	478808	466503	344674	451250	415610	1969300	330431	325998	448316
P13516	P13516	Acyl-CoA desaturase 1	Scd1	sp|P13516|ACOD1_MOUSE Acyl-CoA desaturase 1 OS=Mus musculus OX=10090 GN=Scd1 PE=1 SV=2	1	490483	430182	13320000	10486000	346898	499532	8546600	319865	10192000	8301300	336680	361612	7125800	8370400	6888900	389028	10809000	57604000	10411000	54548000	580933	10196000	7923900	19659000	466503	344674	7832400	415610	21610000	5796300	19151000	18404000
P14246	P14246	Solute carrier family 2, facilitated glucose transporter member 2	Slc2a2	sp|P14246|GTR2_MOUSE Solute carrier family 2, facilitated glucose transporter member 2 OS=Mus musculus OX=10090 GN=Slc2a2 PE=1 SV=3	5	490483	2706300	2695300	4520500	3147400	499532	30620000	319865	3134100	2502700	3471400	361612	2760600	3047000	3251200	389028	1761200	145640000	312879	152230000	580933	4369800	20000000	1137300	15099000	344674	451250	415610	131950000	330431	4910300	448316
P14685	P14685;F7B7L8	26S proteasome non-ATPase regulatory subunit 3	Psmd3	sp|P14685|PSMD3_MOUSE 26S proteasome non-ATPase regulatory subunit 3 OS=Mus musculus OX=10090 GN=Psmd3 PE=1 SV=3	15	490483	521160	295450	532510	346898	499532	6325100	319865	382030	409400	336680	361612	230530	376600	409718	358500	323700	59095000	312879	56741000	580933	104070	1140400	478808	1151500	13046	419830	415610	64987000	1507600	1715000	262310
P14901	P14901	Heme oxygenase 1	Hmox1	sp|P14901|HMOX1_MOUSE Heme oxygenase 1 OS=Mus musculus OX=10090 GN=Hmox1 PE=1 SV=1	2	490483	430182	4352200	2355300	346898	499532	3671400	2697000	2720800	350936	2744300	361612	400566	376107	409718	6327300	342233	747486	4048500	746728	580933	385656	323890	478808	466503	3316200	4479400	3532000	3610600	330431	325998	448316
P15392	P15392	Cytochrome P450 2A4	Cyp2a4	sp|P15392|CP2A4_MOUSE Cytochrome P450 2A4 OS=Mus musculus OX=10090 GN=Cyp2a4 PE=2 SV=3	2	490483	430182	396905	10050000	6520800	4690200	9199900	4963500	5587200	5309900	4821600	361612	5240200	6566000	409718	9249500	342233	747486	312879	746728	580933	385656	323890	478808	5526800	344674	451250	415610	620123	330431	325998	448316
P17426	P17426;P17426-2;A0A140LIG7	AP-2 complex subunit alpha-1	Ap2a1	sp|P17426|AP2A1_MOUSE AP-2 complex subunit alpha-1 OS=Mus musculus OX=10090 GN=Ap2a1 PE=1 SV=1;sp|P17426-2|AP2A1_MOUSE Isoform B of AP-2 complex subunit alpha-1 OS=Mus musculus OX=10090 GN=Ap2a1	5	490483	430182	396905	356080	346898	499532	1929800	319865	360188	350936	336680	361612	400566	376107	409718	389028	342233	8978000	312879	11484000	580933	385656	2415100	478808	466503	344674	451250	415610	15439000	330431	325998	448316
P18528	P18528	Immunoglobulinheavy chain V region 6.96		sp|P18528|HVM57_MOUSE Ig heavy chain V region 6.96 OS=Mus musculus OX=10090 PE=4 SV=1	1	12195000	430182	396905	7164800	128480000	50039000	6248200	319865	3664900	6181300	5760100	361612	400566	84238000	409718	13308000	342233	5734900	2677200	746728	580933	54435000	323890	32772000	8136200	361040000	6065800	15388000	620123	330431	4325400	448316
P18531	P18531;A0A075B5S8;A0A075B5S6	Immunoglobulinheavy chain V region 3-6	Ighv3-6;Ighv3-1	sp|P18531|HVM60_MOUSE Ig heavy chain V region 3-6 OS=Mus musculus OX=10090 GN=Ighv3-6 PE=1 SV=1;tr|A0A075B5S8|A0A075B5S8_MOUSE Ig heavy chain V region 3-6 OS=Mus musculus OX=10090 GN=Ighv3-6 PE=1 SV=1;tr|A0A075B5S6|A0A075B5S6_MOUSE Immunoglobulin heavy var	2	8666100	54295000	396905	356080	346898	499532	9182700	319865	360188	350936	336680	361612	400566	376107	409718	389028	342233	747486	312879	746728	580933	385656	323890	478808	466503	344674	451250	415610	620123	330431	325998	448316
P18828-2	P18828-2;P18828	Syndecan-1	Sdc1	sp|P18828-2|SDC1_MOUSE Isoform 2 of Syndecan-1 OS=Mus musculus OX=10090 GN=Sdc1;sp|P18828|SDC1_MOUSE Syndecan-1 OS=Mus musculus OX=10090 GN=Sdc1 PE=1 SV=1	1	3586700	2676300	2363900	2075000	2708300	5030200	2147600	2592400	2331300	2376600	5486400	2261400	2982200	2627200	2702000	3596400	2183000	870350	1739800	1676900	2111000	2451000	1369000	2300400	2333000	3141300	3174100	3695900	2436600	1621100	1242600	2724400
P19324	P19324	Serpin H1	Serpinh1	sp|P19324|SERPH_MOUSE Serpin H1 OS=Mus musculus OX=10090 GN=Serpinh1 PE=1 SV=3	1	4848200	8881900	11690000	10844000	10255000	7559800	15484000	9181100	15076000	6993700	16342000	12270000	10789000	11354000	12614000	7554300	17485000	9780600	13609000	9928400	580933	19114000	20877000	34055000	14179000	7593700	18454000	19078000	10772000	24369000	20441000	34046000
P20801	P20801	Troponin C, skeletal muscle	Tnnc2	sp|P20801|TNNC2_MOUSE Troponin C, skeletal muscle OS=Mus musculus OX=10090 GN=Tnnc2 PE=1 SV=2	2	490483	430182	396905	356080	61784000	23081000	560352	24720000	360188	350936	336680	361612	130380000	376107	409718	389028	342233	747486	312879	746728	580933	385656	323890	478808	117830000	344674	451250	415610	620123	330431	325998	448316
P21126	P21126;F8WHM4	Ubiquitin-like protein 4A	Ubl4a	sp|P21126|UBL4A_MOUSE Ubiquitin-like protein 4A OS=Mus musculus OX=10090 GN=Ubl4a PE=1 SV=1	3	490483	430182	8647800	6154700	7161600	5127000	560352	6302100	4514200	6575600	6738300	5190400	6131400	5986500	5415500	6003700	10787000	4420900	5197700	4841800	580933	9342900	4813000	7227900	6592700	344674	4269000	415610	620123	5896700	8263100	5205900
P21278	P21278	Guanine nucleotide-binding protein subunit alpha-11	Gna11	sp|P21278|GNA11_MOUSE Guanine nucleotide-binding protein subunit alpha-11 OS=Mus musculus OX=10090 GN=Gna11 PE=1 SV=1	4	490483	74527	87822	71293	50331	56355	969150	36576	69740	53645	57000	44226	52009	56952	61985	50756	342233	7541500	41836	6224300	580933	80979	255270	478808	318090	72997	71921	87667	15755000	318120	242040	92324
P21279	P21279	Guanine nucleotide-binding protein G(q) subunit alpha	Gnaq	sp|P21279|GNAQ_MOUSE Guanine nucleotide-binding protein G(q) subunit alpha OS=Mus musculus OX=10090 GN=Gnaq PE=1 SV=4	3	490483	430182	396905	356080	346898	499532	2288600	319865	360188	350936	336680	361612	400566	1944100	1698100	389028	342233	3127200	312879	2323100	580933	385656	323890	478808	466503	344674	3077800	415610	3053300	330431	325998	448316
P21440	P21440;A0A0G2JDM4	Multidrug resistance protein 3	Abcb4	sp|P21440|MDR3_MOUSE Phosphatidylcholine translocator ABCB4 OS=Mus musculus OX=10090 GN=Abcb4 PE=1 SV=2;tr|A0A0G2JDM4|A0A0G2JDM4_MOUSE Phosphatidylcholine translocator ABCB4 (Fragment) OS=Mus musculus OX=10090 GN=Abcb4 PE=1 SV=1	3	490483	430182	396905	356080	346898	499532	560352	319865	360188	350936	336680	361612	400566	376107	409718	2264600	342233	5248500	312879	4376400	580933	385656	323890	478808	466503	344674	451250	415610	7077200	330431	325998	448316
P21550	P21550;Q5SX59;J3QPZ9;Q5SX60;Q5SX61	Beta-enolase;Enolase	Eno3	sp|P21550|ENOB_MOUSE Beta-enolase OS=Mus musculus OX=10090 GN=Eno3 PE=1 SV=3;tr|Q5SX59|Q5SX59_MOUSE 2-phospho-D-glycerate hydro-lyase (Fragment) OS=Mus musculus OX=10090 GN=Eno3 PE=1 SV=1	10	733860	430182	396905	775850	35424000	26476000	560352	17897000	360188	350936	2789100	361612	132530000	376107	409718	872550	768040	747486	312879	746728	1318700	385656	323890	478808	135250000	1071100	451250	415610	620123	695520	325998	448316
P22366-2	P22366-2;P22366	Myeloid differentiation primary response protein MyD88	Myd88	sp|P22366-2|MYD88_MOUSE Isoform 2 of Myeloid differentiation primary response protein MyD88 OS=Mus musculus OX=10090 GN=Myd88;sp|P22366|MYD88_MOUSE Myeloid differentiation primary response protein MyD88 OS=Mus musculus OX=10090 GN=Myd88 PE=1 SV=3	1	490483	430182	396905	356080	346898	499532	560352	319865	360188	350936	336680	361612	400566	376107	409718	389028	342233	747486	312879	746728	580933	385656	323890	478808	466503	344674	451250	415610	620123	330431	325998	448316
P27612	P27612;F7D1R5	Phospholipase A-2-activating protein	Plaa	sp|P27612|PLAP_MOUSE Phospholipase A-2-activating protein OS=Mus musculus OX=10090 GN=Plaa PE=1 SV=4	3	490483	430182	396905	356080	346898	499532	560352	319865	360188	350936	336680	361612	400566	376107	409718	389028	342233	747486	312879	2629600	580933	385656	323890	478808	466503	344674	451250	415610	1634400	330431	325998	448316
P27656	P27656;A0A1L1SRU8;Q3TYU0	Hepatic triacylglycerol lipase	Lipc	sp|P27656|LIPC_MOUSE Hepatic triacylglycerol lipase OS=Mus musculus OX=10090 GN=Lipc PE=2 SV=2;tr|A0A1L1SRU8|A0A1L1SRU8_MOUSE Hepatic triacylglycerol lipase (Fragment) OS=Mus musculus OX=10090 GN=Lipc PE=1 SV=1;tr|Q3TYU0|Q3TYU0_MOUSE Hepatic triacylglycero	2	1452300	3328300	2379000	356080	1796400	499532	560352	1717900	360188	350936	336680	3105900	400566	1345300	1589000	389028	342233	747486	1755800	746728	580933	385656	323890	478808	466503	344674	451250	415610	1893900	1723000	2126700	448316
P27661	P27661;Q64522	Histone H2AX;Histone H2A type 2-B	H2afx;Hist2h2ab	sp|P27661|H2AX_MOUSE Histone H2AX OS=Mus musculus OX=10090 GN=H2ax PE=1 SV=2;sp|Q64522|H2A2B_MOUSE Histone H2A type 2-B OS=Mus musculus OX=10090 GN=H2ac21 PE=1 SV=3	1	28750000	32676000	17490000	44991000	20993000	25171000	22311000	25272000	19062000	49428000	21415000	55803000	76094000	40574000	31837000	22786000	25258000	27321000	33009000	24788000	49050000	40555000	30169000	29166000	34841000	43135000	32113000	37677000	84192000	44405000	32182000	92617000
P28033-3	P28033-3;P28033	CCAAT/enhancer-binding protein beta	Cebpb	sp|P28033-3|CEBPB_MOUSE Isoform 2 of CCAAT/enhancer-binding protein beta OS=Mus musculus OX=10090 GN=Cebpb;sp|P28033|CEBPB_MOUSE CCAAT/enhancer-binding protein beta OS=Mus musculus OX=10090 GN=Cebpb PE=1 SV=1	1	490483	430182	396905	356080	346898	499532	560352	319865	360188	350936	336680	361612	400566	376107	409718	955830	342233	1242200	312879	1218800	580933	1060800	323890	478808	946850	344674	451250	415610	620123	330431	325998	448316
P28230	P28230	Gap junction beta-1 protein	Gjb1	sp|P28230|CXB1_MOUSE Gap junction beta-1 protein OS=Mus musculus OX=10090 GN=Gjb1 PE=1 SV=3	3	1546600	3204500	396905	356080	346898	499532	4490100	319865	360188	350936	1566900	361612	1903100	376107	409718	389028	342233	10668000	312879	13349000	580933	385656	323890	478808	466503	344674	451250	415610	18206000	330431	325998	448316
P28654	P28654	Decorin	Dcn	sp|P28654|PGS2_MOUSE Decorin OS=Mus musculus OX=10090 GN=Dcn PE=1 SV=1	2	9091200	10884000	7905800	11089000	6145000	11303000	560352	15212000	360188	7333400	10080000	8748900	9267200	8966800	409718	8216000	10274000	6214400	6963300	746728	580933	11209000	6510000	5805500	13917000	10190000	6737600	7749900	5820000	6374200	6094000	10710000
P28666	P28666	Murinoglobulin-2	Mug2	sp|P28666|MUG2_MOUSE Murinoglobulin-2 OS=Mus musculus OX=10090 GN=Mug2 PE=1 SV=2	5	490483	430182	1072100	356080	5878900	1300200	4581100	1345900	360188	350936	1566900	361612	1012700	376107	1005500	389028	342233	12723000	3226200	12131000	580933	3038400	5100700	478808	6593400	2866900	1926900	2382400	28846000	2424000	1043300	448316
P28667	P28667	MARCKS-related protein	Marcksl1	sp|P28667|MRP_MOUSE MARCKS-related protein OS=Mus musculus OX=10090 GN=Marcksl1 PE=1 SV=2	1	490483	430182	396905	356080	346898	499532	560352	319865	360188	350936	336680	361612	400566	376107	409718	389028	342233	747486	312879	746728	580933	385656	323890	478808	466503	344674	451250	415610	620123	330431	325998	448316
P30275	P30275;A2ARP5	Creatine kinase U-type, mitochondrial	Ckmt1	sp|P30275|KCRU_MOUSE Creatine kinase U-type, mitochondrial OS=Mus musculus OX=10090 GN=Ckmt1 PE=1 SV=1	1	490483	430182	396905	356080	346898	33068000	560352	319865	360188	350936	336680	361612	400566	20575000	409718	389028	342233	747486	312879	746728	580933	385656	323890	478808	466503	344674	451250	415610	620123	330431	325998	448316
P30412	P30412	Peptidyl-prolyl cis-trans isomerase C	Ppic	sp|P30412|PPIC_MOUSE Peptidyl-prolyl cis-trans isomerase C OS=Mus musculus OX=10090 GN=Ppic PE=1 SV=1	3	13662000	8026600	6634700	10739000	12468000	15041000	7855000	9719900	8523400	350936	10062000	7881500	12465000	12463000	8282700	18153000	7768000	747486	12341000	746728	6737100	10724000	323890	9345200	466503	9180400	6794800	8006700	620123	8836800	6957400	448316
P31001	P31001	Desmin	Des	sp|P31001|DESM_MOUSE Desmin OS=Mus musculus OX=10090 GN=Des PE=1 SV=3	3	490483	6545000	6350400	5578500	346898	6375600	7453100	6580800	7323000	6482500	5991500	6373200	6623600	6166300	7383500	6754900	6398800	15684000	6197300	8823500	580933	6970800	6309400	7006800	466503	6323800	7274000	7044600	8100900	6210800	325998	7673100
P31938	P31938	Dual specificity mitogen-activated protein kinase kinase 1	Map2k1	sp|P31938|MP2K1_MOUSE Dual specificity mitogen-activated protein kinase kinase 1 OS=Mus musculus OX=10090 GN=Map2k1 PE=1 SV=2	2	490483	575920	396905	594390	545420	620240	1066800	319865	360188	593710	635100	796240	400566	376107	670500	843590	342233	5152100	512530	4444600	580933	863960	734640	478808	1074300	631390	451250	637790	4449300	889750	687130	448316
P32507-2	P32507-2;P32507	Nectin-2	Pvrl2	sp|P32507-2|NECT2_MOUSE Isoform Alpha of Nectin-2 OS=Mus musculus OX=10090 GN=Nectin2;sp|P32507|NECT2_MOUSE Nectin-2 OS=Mus musculus OX=10090 GN=Nectin2 PE=1 SV=2	3	490483	430182	396905	356080	346898	499532	560352	319865	360188	350936	15216000	361612	400566	376107	7730000	389028	342233	747486	312879	746728	580933	385656	323890	478808	466503	344674	451250	13770000	620123	330431	10492000	448316
P32921-2	P32921-2;P32921;E0CXX4;E0CXQ4	Tryptophan--tRNA ligase, cytoplasmic;T1-TrpRS;T2-TrpRS	Wars	sp|P32921-2|SYWC_MOUSE Isoform 2 of Tryptophan--tRNA ligase, cytoplasmic OS=Mus musculus OX=10090 GN=Wars1;sp|P32921|SYWC_MOUSE Tryptophan--tRNA ligase, cytoplasmic OS=Mus musculus OX=10090 GN=Wars1 PE=1 SV=2	5	5512600	6647900	8352000	9409400	346898	499532	9407900	8290500	8646500	350936	7173300	361612	10871000	376107	409718	12979000	6717000	23126000	16088000	15661000	580933	10403000	9711700	8975400	8320300	8219400	9199500	8775000	15582000	10676000	7652600	11161000
P33587	P33587	Vitamin K-dependent protein C;Vitamin K-dependent protein C light chain;Vitamin K-dependent protein C heavy chain;Activation peptide	Proc	sp|P33587|PROC_MOUSE Vitamin K-dependent protein C OS=Mus musculus OX=10090 GN=Proc PE=1 SV=2	1	490483	430182	396905	356080	346898	499532	560352	319865	360188	350936	336680	361612	400566	376107	409718	389028	342233	747486	312879	746728	580933	385656	323890	478808	466503	344674	451250	415610	620123	330431	325998	448316
P34821	P34821;P34821-2	Bone morphogenetic protein 8A	Bmp8a	sp|P34821|BMP8A_MOUSE Bone morphogenetic protein 8A OS=Mus musculus OX=10090 GN=Bmp8a PE=2 SV=1;sp|P34821-2|BMP8A_MOUSE Isoform 2 of Bone morphogenetic protein 8A OS=Mus musculus OX=10090 GN=Bmp8a	1	1695900	806580	945870	356080	1800800	1821500	521390	319865	712610	350936	3599300	361612	400566	376107	409718	389028	342233	747486	312879	746728	580933	385656	323890	478808	466503	344674	1529900	1227600	620123	330431	325998	779010
P35235	P35235;P35235-1	Tyrosine-protein phosphatase non-receptor type 11	Ptpn11	sp|P35235|PTN11_MOUSE Tyrosine-protein phosphatase non-receptor type 11 OS=Mus musculus OX=10090 GN=Ptpn11 PE=1 SV=3;sp|P35235-1|PTN11_MOUSE Isoform 2 of Tyrosine-protein phosphatase non-receptor type 11 OS=Mus musculus OX=10090 GN=Ptpn11	2	490483	430182	396905	356080	346898	499532	560352	319865	3311900	350936	336680	361612	400566	376107	5213100	389028	4729100	10746000	4873700	6098700	580933	5018700	323890	478808	466503	344674	451250	415610	12010000	4051800	325998	448316
P35290	P35290	Ras-related protein Rab-24	Rab24	sp|P35290|RAB24_MOUSE Ras-related protein Rab-24 OS=Mus musculus OX=10090 GN=Rab24 PE=1 SV=2	3	490483	10088000	7520500	356080	7263200	6657400	3381900	7440800	5612300	2357300	336680	7166700	11065000	6880200	409718	4763000	7175100	3466300	6072400	746728	8363300	11713000	7982400	8426200	4907800	5741700	8213100	9166000	5159200	6313900	7303100	9701900
P35550	P35550;A0A140LIR6;Q80WS3	rRNA 2-O-methyltransferase fibrillarin	Fbl	sp|P35550|FBRL_MOUSE rRNA 2-O-methyltransferase fibrillarin OS=Mus musculus OX=10090 GN=Fbl PE=1 SV=2	4	9373200	7386300	396905	11336000	9154400	8738400	9367400	13148000	10462000	8985500	336680	11377000	9224700	376107	10379000	7223900	10126000	14459000	6727700	12796000	14492000	385656	7658000	9844900	10486000	9502100	10333000	9401000	26672000	8584500	10000000	10382000
P35576	P35576	Glucose-6-phosphatase	G6pc	sp|P35576|G6PC_MOUSE Glucose-6-phosphatase OS=Mus musculus OX=10090 GN=G6pc PE=1 SV=2	5	490483	4857500	4944200	5135500	6385100	4225800	12385000	319865	3833500	7630900	2443700	6917600	4575300	3150900	3841600	389028	6987700	79023000	7087200	73281000	580933	9511900	14484000	1423200	3874200	4588800	5215500	7389600	46605000	12994000	11722000	12279000
P39054	P39054;G3X9G4;P39054-2;Q3TCR7;F8WIV5;Q3T9X3;G3UZZ3;G3UXX2;G3UY64;A0A0J9YUN4;E9QLL2;A0A0J9YUE9;F2Z460;E0CXZ8;Q8BZ98-2;P39053-5;P39053-3;P39053-6;P39053-4;P39053;Q8BZ98	Dynamin-2	Dnm2	sp|P39054|DYN2_MOUSE Dynamin-2 OS=Mus musculus OX=10090 GN=Dnm2 PE=1 SV=2;tr|G3X9G4|G3X9G4_MOUSE Dynamin GTPase OS=Mus musculus OX=10090 GN=Dnm2 PE=1 SV=1;sp|P39054-2|DYN2_MOUSE Isoform 2 of Dynamin-2 OS=Mus musculus OX=10090 GN=Dnm2;tr|Q3TCR7|Q3TCR7_MOUSE	8	490483	430182	396905	356080	346898	499532	560352	319865	360188	350936	336680	361612	400566	376107	409718	389028	342233	12700000	312879	12185000	580933	385656	323890	478808	4669900	344674	451250	415610	21143000	330431	325998	448316
P40240	P40240	CD9 antigen	Cd9	sp|P40240|CD9_MOUSE CD9 antigen OS=Mus musculus OX=10090 GN=Cd9 PE=1 SV=2	1	490483	430182	10481000	10516000	12629000	15947000	9960800	12370000	8976800	350936	9641400	9242400	10855000	376107	409718	14696000	342233	747486	9317300	746728	9865800	385656	323890	478808	466503	10860000	451250	9430800	620123	11527000	325998	448316
P40336	P40336;P40336-2;A0A1W2P7R7;Q8C0E2-2;Q8C0E2	Vacuolar protein sorting-associated protein 26A	Vps26a	sp|P40336|VP26A_MOUSE Vacuolar protein sorting-associated protein 26A OS=Mus musculus OX=10090 GN=Vps26a PE=1 SV=1;sp|P40336-2|VP26A_MOUSE Isoform 2 of Vacuolar protein sorting-associated protein 26A OS=Mus musculus OX=10090 GN=Vps26a	4	490483	5965100	7505200	7471600	8238400	3710500	7698900	319865	6816600	350936	336680	361612	5922800	376107	8380700	389028	342233	41598000	312879	18980000	8995000	385656	7889900	7654000	8338000	344674	451250	415610	21765000	10175000	325998	6913500
P41241	P41241;A0A1L1SR46;A0A1L1STA1	Tyrosine-protein kinase CSK	Csk	sp|P41241|CSK_MOUSE Tyrosine-protein kinase CSK OS=Mus musculus OX=10090 GN=Csk PE=1 SV=2;tr|A0A1L1SR46|A0A1L1SR46_MOUSE Tyrosine-protein kinase CSK (Fragment) OS=Mus musculus OX=10090 GN=Csk PE=1 SV=1;tr|A0A1L1STA1|A0A1L1STA1_MOUSE Tyrosine-protein kinase	2	490483	430182	3755100	356080	346898	499532	560352	319865	360188	350936	336680	361612	400566	376107	409718	389028	342233	10229000	312879	7414900	580933	385656	323890	478808	466503	344674	451250	415610	9802400	330431	325998	448316
P42669	P42669	Transcriptional activator protein Pur-alpha	Pura	sp|P42669|PURA_MOUSE Transcriptional activator protein Pur-alpha OS=Mus musculus OX=10090 GN=Pura PE=1 SV=1	5	490483	584050	677230	3387800	346898	686820	6640000	572340	360188	1352600	743540	361612	400566	1997500	409718	389028	342233	29642000	312879	129650000	580933	4691300	323890	478808	5117500	719710	451250	2567900	32711000	6481600	5036100	448316
P43275	P43275	Histone H1.1	Hist1h1a	sp|P43275|H11_MOUSE Histone H1.1 OS=Mus musculus OX=10090 GN=H1-1 PE=1 SV=2	1	12302000	6435600	396905	8996300	346898	8962200	6716800	319865	360188	7430400	336680	7946900	9889400	10586000	409718	389028	11639000	10268000	9082600	6507900	580933	385656	323890	478808	466503	7785500	9176800	415610	10099000	330431	325998	9648200
P43277	P43277	Histone H1.3	Hist1h1d	sp|P43277|H13_MOUSE Histone H1.3 OS=Mus musculus OX=10090 GN=H1-3 PE=1 SV=2	1	36726000	54133000	33217000	49125000	29668000	45163000	30030000	27080000	20221000	53940000	19940000	49022000	65102000	42665000	29772000	21692000	54337000	30623000	39870000	27844000	29900000	23592000	32491000	28244000	38035000	27211000	47353000	50151000	26129000	31541000	38122000	69718000
P46414	P46414	Cyclin-dependent kinase inhibitor 1B	Cdkn1b	sp|P46414|CDN1B_MOUSE Cyclin-dependent kinase inhibitor 1B OS=Mus musculus OX=10090 GN=Cdkn1b PE=1 SV=2	1	2858400	2710300	4298700	3083800	2898700	3356500	3132200	3470700	2592600	2490700	3451300	2811800	3048400	3358700	3398400	3867800	3045600	1912200	2753600	2521100	2538200	4146700	3196900	3680100	2701500	3031300	3209100	3301300	2346000	3224800	2809100	3352100
P46467	P46467	Vacuolar protein sorting-associated protein 4B	Vps4b	sp|P46467|VPS4B_MOUSE Vacuolar protein sorting-associated protein 4B OS=Mus musculus OX=10090 GN=Vps4b PE=1 SV=2	1	490483	430182	2434400	1951300	346898	1908700	2100600	319865	360188	1647400	336680	1856900	400566	1618900	409718	389028	342233	11681000	312879	8660400	580933	385656	323890	478808	2449800	2836900	451250	415610	12528000	2805700	3022900	1529700
P46718	P46718;A0A0R4J0N5;A2T4N6	Programmed cell death protein 2	Pdcd2	sp|P46718|PDCD2_MOUSE Programmed cell death protein 2 OS=Mus musculus OX=10090 GN=Pdcd2 PE=2 SV=2;tr|A0A0R4J0N5|A0A0R4J0N5_MOUSE Programmed cell death protein 2 OS=Mus musculus OX=10090 GN=Pdcd2 PE=1 SV=1;tr|A2T4N6|A2T4N6_MOUSE Programmed cell death 2 alte	2	4631000	5164700	5001900	8277200	346898	4981000	6088600	5490300	6108500	5257200	3321100	6973300	400566	376107	4543500	5294100	2602500	2461200	4712900	746728	580933	385656	7042400	4990600	7324300	3802100	451250	3800900	2190900	330431	325998	4704400
P46935	P46935;V9GWV8;Q3V335;A0A571BEP7;A0A571BDN7;V9GXK3	E3 ubiquitin-protein ligase NEDD4	Nedd4	sp|P46935|NEDD4_MOUSE E3 ubiquitin-protein ligase NEDD4 OS=Mus musculus OX=10090 GN=Nedd4 PE=1 SV=3;tr|V9GWV8|V9GWV8_MOUSE E3 ubiquitin-protein ligase NEDD4 (Fragment) OS=Mus musculus OX=10090 GN=Nedd4 PE=1 SV=8;tr|Q3V335|Q3V335_MOUSE E3 ubiquitin-protein	6	4677400	9499500	3588600	3251800	346898	8335500	6181300	5829300	360188	4081400	6771800	5211300	6244900	4580600	3147400	389028	7966600	12938000	7310000	11664000	3251800	6945700	5490200	3627100	6189300	7310000	6971300	5356100	15528000	330431	325998	448316
P46978	P46978;D3YZN5	Dolichyl-diphosphooligosaccharide--protein glycosyltransferase subunit STT3A	Stt3a	sp|P46978|STT3A_MOUSE Dolichyl-diphosphooligosaccharide--protein glycosyltransferase subunit STT3A OS=Mus musculus OX=10090 GN=Stt3a PE=1 SV=1	12	490483	430182	265510	356080	683260	499532	4671000	319865	360188	350936	336680	361612	400566	376107	409718	260990	342233	72427000	312879	76133000	277340	746930	2444300	416890	2349100	250540	451250	415610	40888000	330431	602590	448316
P47758	P47758	Signal recognition particle receptor subunit beta	Srprb	sp|P47758|SRPRB_MOUSE Signal recognition particle receptor subunit beta OS=Mus musculus OX=10090 GN=Srprb PE=1 SV=1	5	490483	16432000	14338000	15743000	14857000	14278000	13001000	13305000	12235000	14229000	12343000	11531000	9355100	11987000	17798000	15136000	16298000	20006000	19604000	19792000	580933	12933000	14395000	16271000	18724000	13051000	11488000	415610	23279000	14114000	13984000	448316
P47811-4	P47811-4;P47811-3;P47811	Mitogen-activated protein kinase 14	Mapk14	sp|P47811-4|MK14_MOUSE Isoform 4 of Mitogen-activated protein kinase 14 OS=Mus musculus OX=10090 GN=Mapk14;sp|P47811-3|MK14_MOUSE Isoform 3 of Mitogen-activated protein kinase 14 OS=Mus musculus OX=10090 GN=Mapk14;sp|P47811|MK14_MOUSE Mitogen-activated pro	1	490483	430182	396905	1654500	346898	499532	560352	319865	1806200	350936	336680	1270700	400566	1907700	409718	389028	342233	3461000	1695700	3209800	580933	1401900	323890	478808	2051300	344674	451250	415610	2993100	330431	325998	448316
P47857	P47857;P47857-2;P47857-3;A0A2R8VHA5;A0A2R8VHV2	ATP-dependent 6-phosphofructokinase, muscle type	Pfkm	sp|P47857|PFKAM_MOUSE ATP-dependent 6-phosphofructokinase, muscle type OS=Mus musculus OX=10090 GN=Pfkm PE=1 SV=3;sp|P47857-2|PFKAM_MOUSE Isoform 2 of ATP-dependent 6-phosphofructokinase, muscle type OS=Mus musculus OX=10090 GN=Pfkm;sp|P47857-3|PFKAM_MOUSE	4	8931700	9801000	7612300	356080	346898	8371100	6146200	6211500	5979000	5930400	336680	361612	7744800	5125000	6080800	5802800	8230900	8807700	6192000	10299000	580933	5932600	9005100	8841900	11165000	344674	451250	415610	6259100	12772000	10649000	5939400
P49182	P49182	Heparin cofactor 2	Serpind1	sp|P49182|HEP2_MOUSE Heparin cofactor 2 OS=Mus musculus OX=10090 GN=Serpind1 PE=1 SV=1	3	490483	8531500	7422200	7221200	7777700	5363600	5981200	319865	4195700	5374800	7991000	361612	5505200	5447500	409718	8154900	7443400	7557000	11269000	8069300	580933	6232100	323890	478808	9020400	8208000	5464600	6202700	6457700	8812800	6944800	5700300
P49442	P49442;E0CYQ4;E0CX64;H3BK26	Inositol polyphosphate 1-phosphatase	Inpp1	sp|P49442|INPP_MOUSE Inositol polyphosphate 1-phosphatase OS=Mus musculus OX=10090 GN=Inpp1 PE=1 SV=2	3	490483	430182	396905	356080	6937300	499532	8302700	6033700	360188	350936	336680	361612	6954700	376107	7785200	389028	342233	10191000	312879	7988100	580933	385656	7546300	478808	7317700	4541400	4721900	415610	8997300	7038900	6813800	6481600
P50295	P50295;P50296;P50294	Arylamine N-acetyltransferase 2	Nat2	sp|P50295|ARY2_MOUSE Arylamine N-acetyltransferase 2 OS=Mus musculus OX=10090 GN=Nat2 PE=1 SV=1	5	490483	9521300	16045000	10483000	8610900	499532	24804000	13256000	16723000	7577300	7286800	6783100	13238000	12538000	27240000	12298000	14041000	56107000	312879	46468000	42486000	27333000	6685800	15140000	26507000	19331000	30612000	24934000	61841000	4412800	20906000	23759000
P50543	P50543	Protein S100-A11	S100a11	sp|P50543|S10AB_MOUSE Protein S100-A11 OS=Mus musculus OX=10090 GN=S100a11 PE=1 SV=1	1	93131000	53317000	48765000	50791000	51213000	79597000	36283000	57608000	40834000	48847000	61118000	62971000	40793000	57193000	47105000	85636000	42228000	24766000	51780000	23662000	42855000	44728000	45970000	49301000	51144000	77743000	44694000	38989000	19151000	42902000	32763000	32705000
P50608	P50608	Fibromodulin	Fmod	sp|P50608|FMOD_MOUSE Fibromodulin OS=Mus musculus OX=10090 GN=Fmod PE=2 SV=1	2	490483	430182	396905	356080	346898	499532	560352	319865	360188	350936	336680	361612	400566	376107	409718	389028	342233	747486	312879	746728	580933	385656	323890	478808	466503	344674	451250	415610	620123	330431	325998	448316
P51175	P51175;A0A0A6YX50	Protoporphyrinogen oxidase	Ppox	sp|P51175|PPOX_MOUSE Protoporphyrinogen oxidase OS=Mus musculus OX=10090 GN=Ppox PE=1 SV=1;tr|A0A0A6YX50|A0A0A6YX50_MOUSE Protoporphyrinogen oxidase (Fragment) OS=Mus musculus OX=10090 GN=Ppox PE=1 SV=1	3	490483	430182	396905	356080	346898	499532	560352	319865	360188	350936	336680	361612	400566	376107	409718	389028	342233	747486	312879	746728	580933	385656	323890	478808	466503	344674	451250	415610	620123	330431	325998	448316
P51437	P51437	Cathelin-related antimicrobial peptide	Camp	sp|P51437|CAMP_MOUSE Cathelicidin antimicrobial peptide OS=Mus musculus OX=10090 GN=Camp PE=1 SV=2	1	7957000	430182	7968400	6850600	346898	9208500	560352	319865	360188	350936	336680	361612	400566	376107	409718	389028	342233	747486	312879	746728	580933	385656	323890	478808	466503	8541100	451250	415610	620123	330431	325998	448316
P51667	P51667;D3Z0I3;D3YW14;D3YUI7;E9Q8Y0;A0A0G2JE15;F6RBQ5;A0A0G2JDZ4;E9QNY3;Q62082-3;Q62082-2;Q62082	Myosin regulatory light chain 2, ventricular/cardiac muscle isoform	Myl2	sp|P51667|MLRV_MOUSE Myosin regulatory light chain 2, ventricular/cardiac muscle isoform OS=Mus musculus OX=10090 GN=Myl2 PE=1 SV=3;tr|D3Z0I3|D3Z0I3_MOUSE Myosin regulatory light chain 2, ventricular/cardiac muscle isoform (Fragment) OS=Mus musculus OX=100	3	490483	430182	396905	356080	6328300	499532	560352	319865	360188	350936	336680	361612	20022000	376107	409718	389028	342233	747486	312879	746728	580933	385656	323890	478808	9209200	344674	451250	415610	620123	330431	325998	448316
P51863	P51863	V-type proton ATPase subunit d 1	Atp6v0d1	sp|P51863|VA0D1_MOUSE V-type proton ATPase subunit d 1 OS=Mus musculus OX=10090 GN=Atp6v0d1 PE=1 SV=2	1	490483	430182	396905	356080	346898	499532	560352	319865	360188	350936	336680	361612	400566	376107	409718	389028	342233	12458000	312879	14116000	580933	385656	323890	478808	466503	344674	451250	415610	11525000	330431	325998	448316
P51910	P51910	Apolipoprotein D	Apod	sp|P51910|APOD_MOUSE Apolipoprotein D OS=Mus musculus OX=10090 GN=Apod PE=1 SV=1	1	6894600	7091000	4362800	5672900	346898	8316800	5902000	6720400	7126900	5130000	7045400	5338000	8263800	6588900	6794800	5202500	6975300	5409900	6996200	746728	5688600	10923000	323890	5424700	466503	9003200	8107800	4488500	620123	5294600	325998	6105200
P52479	P52479;P52479-2	Ubiquitin carboxyl-terminal hydrolase 10	Usp10	sp|P52479|UBP10_MOUSE Ubiquitin carboxyl-terminal hydrolase 10 OS=Mus musculus OX=10090 GN=Usp10 PE=1 SV=3;sp|P52479-2|UBP10_MOUSE Isoform 2 of Ubiquitin carboxyl-terminal hydrolase 10 OS=Mus musculus OX=10090 GN=Usp10	3	490483	430182	396905	356080	346898	499532	560352	319865	360188	350936	336680	361612	400566	376107	409718	389028	6765900	747486	312879	746728	580933	385656	323890	478808	466503	344674	8330800	415610	620123	330431	6706500	448316
P52840	P52840	Sulfotransferase 1A1	Sult1a1	sp|P52840|ST1A1_MOUSE Sulfotransferase 1A1 OS=Mus musculus OX=10090 GN=Sult1a1 PE=1 SV=1	1	63459000	36813000	51046000	59216000	40094000	67765000	99144000	51741000	44594000	56901000	49444000	46009000	38185000	58697000	42859000	64010000	342233	125740000	22125000	100720000	580933	25571000	27492000	478808	27885000	39255000	21195000	22466000	122380000	29962000	325998	448316
P52843	P52843	Bile salt sulfotransferase 1	Sult2a1	sp|P52843|ST2A1_MOUSE Bile salt sulfotransferase 1 OS=Mus musculus OX=10090 GN=Sult2a1 PE=1 SV=1	6	17504000	21139000	26459000	45818000	14333000	499532	92477000	6186800	11682000	27979000	336680	20014000	400566	17090000	409718	389028	342233	747486	312879	746728	580933	385656	323890	478808	466503	344674	451250	415610	620123	330431	325998	448316
P53702	P53702;G3UXK7	Cytochrome c-type heme lyase	Hccs	sp|P53702|CCHL_MOUSE Cytochrome c-type heme lyase OS=Mus musculus OX=10090 GN=Hccs PE=1 SV=2;tr|G3UXK7|G3UXK7_MOUSE Cytochrome c-type heme lyase OS=Mus musculus OX=10090 GN=Hccs PE=1 SV=1	2	490483	430182	7873700	5458900	346898	7410700	560352	9316900	6408100	350936	9105500	361612	400566	376107	9745600	4384000	9241000	747486	12600000	746728	580933	12922000	323890	478808	466503	344674	6062800	9957300	620123	6304300	325998	448316
P53986	P53986	Monocarboxylate transporter 1	Slc16a1	sp|P53986|MOT1_MOUSE Monocarboxylate transporter 1 OS=Mus musculus OX=10090 GN=Slc16a1 PE=1 SV=1	4	15961000	430182	396905	356080	346898	499532	560352	319865	360188	350936	336680	361612	400566	376107	409718	389028	342233	20542000	312879	15517000	580933	385656	323890	478808	466503	344674	451250	415610	15002000	330431	325998	448316
P54116	P54116	Erythrocyte band 7 integral membrane protein	Stom	sp|P54116|STOM_MOUSE Stomatin OS=Mus musculus OX=10090 GN=Stom PE=1 SV=3	1	490483	430182	1326900	356080	1027900	499532	560352	319865	360188	350936	336680	361612	400566	376107	409718	389028	1246500	3263200	1189400	2623200	580933	385656	323890	478808	1295400	344674	1029800	1157200	1855600	330431	1088100	448316
P54822	P54822;E9Q242;E9Q3T7;A0A140LHU1;E9Q0A0	Adenylosuccinate lyase	Adsl	sp|P54822|PUR8_MOUSE Adenylosuccinate lyase OS=Mus musculus OX=10090 GN=Adsl PE=1 SV=2;tr|E9Q242|E9Q242_MOUSE Adenylosuccinate lyase OS=Mus musculus OX=10090 GN=Adsl PE=1 SV=1;tr|E9Q3T7|E9Q3T7_MOUSE Adenylosuccinase OS=Mus musculus OX=10090 GN=Adsl PE=1 SV	4	490483	430182	396905	356080	346898	499532	3489800	319865	360188	350936	336680	361612	400566	376107	409718	389028	342233	11266000	312879	13989000	580933	385656	3060800	478808	466503	344674	451250	415610	10253000	3867600	325998	448316
P56382	P56382	ATP synthase subunit epsilon, mitochondrial	Atp5e	sp|P56382|ATP5E_MOUSE ATP synthase subunit epsilon, mitochondrial OS=Mus musculus OX=10090 GN=Atp5f1e PE=1 SV=2	1	20370000	25234000	19263000	25661000	26612000	24092000	23728000	23830000	27134000	25656000	22588000	22205000	27599000	28130000	29800000	25416000	20647000	37378000	28032000	27426000	16358000	33215000	24117000	28631000	29463000	25337000	26387000	25404000	26862000	24445000	15394000	25792000
P56593	P56593	Cytochrome P450 2A12	Cyp2a12	sp|P56593|CP2AC_MOUSE Cytochrome P450 2A12 OS=Mus musculus OX=10090 GN=Cyp2a12 PE=1 SV=2	30	2167200	3810600	851520	8147000	4377900	499532	41965000	258300	4571700	1374100	2780600	361612	2085100	3695100	615520	1328300	132810	254770000	312879	207270000	995410	1393000	7038300	428500	10563000	344674	927010	806490	195760000	2550800	6095300	1111500
P56654	P56654;Q5GLZ0;Q148B1	Cytochrome P450 2C37	Cyp2c37	sp|P56654|CP237_MOUSE Cytochrome P450 2C37 OS=Mus musculus OX=10090 GN=Cyp2c37 PE=1 SV=2	6	490483	18871000	24805000	22429000	43006000	499532	75018000	6345200	16512000	21286000	15939000	25577000	13099000	24946000	23136000	389028	7995100	141480000	312879	139250000	1860800	13390000	16559000	478808	466503	344674	2175000	6016200	98881000	5326500	10183000	1296100
P58021	P58021	Transmembrane 9 superfamily member 2	Tm9sf2	sp|P58021|TM9S2_MOUSE Transmembrane 9 superfamily member 2 OS=Mus musculus OX=10090 GN=Tm9sf2 PE=1 SV=1	2	490483	430182	396905	356080	346898	499532	560352	319865	360188	350936	336680	361612	400566	376107	409718	389028	342233	2380600	312879	4863400	580933	385656	323890	478808	466503	344674	451250	415610	2257800	330431	325998	448316
P58069	P58069	Ras GTPase-activating protein 2	Rasa2	sp|P58069|RASA2_MOUSE Ras GTPase-activating protein 2 OS=Mus musculus OX=10090 GN=Rasa2 PE=1 SV=2	1	490483	70566000	50489000	55199000	40631000	48046000	39946000	60103000	61496000	57540000	336680	51767000	48186000	85607000	51763000	78730000	63207000	23728000	62441000	26578000	580933	41356000	50656000	57251000	35787000	47347000	50801000	44938000	28010000	52502000	106740000	68564000
P58389	P58389	Serine/threonine-protein phosphatase 2A activator	Ppp2r4	sp|P58389|PTPA_MOUSE Serine/threonine-protein phosphatase 2A activator OS=Mus musculus OX=10090 GN=Ptpa PE=1 SV=1	3	490483	3914000	8136600	8051100	5978900	6411300	8710300	3715900	7053500	8569600	6140700	8708600	10055000	376107	7293200	389028	342233	21178000	5643200	17248000	580933	7883400	12841000	478808	8552100	6278300	7478500	3618200	22673000	12535000	325998	6043200
P58735	P58735;G5E8U1;D3Z4W4	Sulfate anion transporter 1	Slc26a1	sp|P58735|S26A1_MOUSE Sulfate anion transporter 1 OS=Mus musculus OX=10090 GN=Slc26a1 PE=1 SV=1;tr|G5E8U1|G5E8U1_MOUSE Sulfate anion transporter 1 OS=Mus musculus OX=10090 GN=Slc26a1 PE=1 SV=1	3	490483	430182	396905	356080	346898	499532	5936600	319865	360188	350936	336680	361612	400566	376107	409718	389028	342233	17577000	312879	15042000	580933	385656	323890	478808	466503	344674	451250	415610	13205000	330431	325998	448316
P58771	P58771;Q8BSH3;Q8BP43	Tropomyosin alpha-1 chain	Tpm1	sp|P58771|TPM1_MOUSE Tropomyosin alpha-1 chain OS=Mus musculus OX=10090 GN=Tpm1 PE=1 SV=1;tr|Q8BSH3|Q8BSH3_MOUSE Tropomyosin alpha-1 chain OS=Mus musculus OX=10090 GN=Tpm1 PE=1 SV=1;tr|Q8BP43|Q8BP43_MOUSE Tropomyosin alpha-1 chain OS=Mus musculus OX=10090	2	490483	430182	396905	356080	48447000	499532	560352	319865	360188	350936	336680	361612	156650000	376107	409718	389028	342233	747486	312879	746728	580933	385656	323890	478808	97094000	344674	451250	415610	620123	330431	325998	448316
P58774-2	P58774-2	Tropomyosin beta chain	Tpm2	sp|P58774-2|TPM2_MOUSE Isoform 2 of Tropomyosin beta chain OS=Mus musculus OX=10090 GN=Tpm2	2	13431000	23628000	20836000	29563000	20072000	29607000	18939000	32470000	360188	13610000	13650000	13765000	16727000	24299000	409718	14402000	23001000	14129000	30094000	10508000	15993000	18622000	323890	478808	466503	17066000	10499000	10050000	620123	330431	19115000	11889000
P59235	P59235	Nucleoporin Nup43	Nup43	sp|P59235|NUP43_MOUSE Nucleoporin Nup43 OS=Mus musculus OX=10090 GN=Nup43 PE=1 SV=2	1	6578100	7590200	5067500	8169400	346898	499532	5583000	319865	4487400	7795000	336680	5442100	6788500	5231000	409718	9624400	342233	747486	7523000	746728	580933	5742700	9615600	478808	466503	8353900	5416700	6536300	620123	330431	6573500	3556200
P59266	P59266	Fat storage-inducing transmembrane protein 2	Fitm2	sp|P59266|FITM2_MOUSE Fat storage-inducing transmembrane protein 2 OS=Mus musculus OX=10090 GN=Fitm2 PE=1 SV=1	2	490483	430182	396905	356080	346898	499532	560352	319865	360188	350936	336680	361612	400566	376107	409718	389028	342233	9034300	312879	10289000	580933	385656	323890	478808	466503	344674	451250	415610	8652100	330431	325998	448316
P60003	P60003	Transcription elongation factor 1 homolog	Elof1	sp|P60003|ELOF1_MOUSE Transcription elongation factor 1 homolog OS=Mus musculus OX=10090 GN=Elof1 PE=1 SV=1	1	490483	8189900	7965500	356080	11307000	13717000	6433100	10769000	10718000	350936	336680	361612	400566	376107	409718	9896800	342233	747486	6683100	746728	580933	385656	323890	478808	466503	344674	451250	415610	620123	330431	325998	9876700
P60229	P60229	Eukaryotic translation initiation factor 3 subunit E	Eif3e	sp|P60229|EIF3E_MOUSE Eukaryotic translation initiation factor 3 subunit E OS=Mus musculus OX=10090 GN=Eif3e PE=1 SV=1	8	490483	3440800	3787700	3623500	3015300	1877200	3768300	614420	3260200	2849200	1994800	3928800	2395500	2541500	3040700	2695600	1929800	19282000	2181400	29648000	859230	3298100	5611000	478808	5184200	4881800	2892000	3123700	18817000	4653300	4101000	3333100
P60840	P60840;P60840-2;P60840-3	Alpha-endosulfine	Ensa	sp|P60840|ENSA_MOUSE Alpha-endosulfine OS=Mus musculus OX=10090 GN=Ensa PE=1 SV=1;sp|P60840-2|ENSA_MOUSE Isoform 2 of Alpha-endosulfine OS=Mus musculus OX=10090 GN=Ensa;sp|P60840-3|ENSA_MOUSE Isoform 3 of Alpha-endosulfine OS=Mus musculus OX=10090 GN=Ensa	2	13891000	9928200	14534000	13705000	346898	21995000	10471000	10563000	10389000	12975000	11767000	10585000	9858100	15365000	11349000	12374000	10274000	8554400	8245500	6034500	580933	14815000	16016000	14351000	9573200	10163000	10179000	9211600	8697600	9549800	20347000	11708000
P61620	P61620;Q9CYJ6;Q9JLR1	Protein transport protein Sec61 subunit alpha isoform 1	Sec61a1	sp|P61620|S61A1_MOUSE Protein transport protein Sec61 subunit alpha isoform 1 OS=Mus musculus OX=10090 GN=Sec61a1 PE=1 SV=2	5	490483	430182	396905	808550	830760	499532	3581500	319865	360188	212220	336680	361612	400566	376107	409718	389028	342233	41688000	312879	30883000	580933	503560	1260000	478808	1999300	267030	451250	338840	29123000	314720	1342100	448316
P61967	P61967	AP-1 complex subunit sigma-1A	Ap1s1	sp|P61967|AP1S1_MOUSE AP-1 complex subunit sigma-1A OS=Mus musculus OX=10090 GN=Ap1s1 PE=1 SV=1	1	490483	430182	396905	356080	346898	499532	560352	319865	360188	350936	336680	361612	400566	376107	409718	389028	342233	9332400	312879	12644000	580933	385656	323890	478808	9927500	6141900	451250	415610	12867000	330431	325998	448316
P61979	P61979;P61979-2;H3BLL4;A0A286YDM3;H3BK96;A0A286YCM2;A0A286YEC4;A0A286YDH1	Heterogeneous nuclear ribonucleoprotein K	Hnrnpk	sp|P61979|HNRPK_MOUSE Heterogeneous nuclear ribonucleoprotein K OS=Mus musculus OX=10090 GN=Hnrnpk PE=1 SV=1;sp|P61979-2|HNRPK_MOUSE Isoform 2 of Heterogeneous nuclear ribonucleoprotein K OS=Mus musculus OX=10090 GN=Hnrnpk;tr|H3BLL4|H3BLL4_MOUSE Heterogene	1	27172000	50878000	52899000	32799000	45155000	38510000	34572000	31859000	42792000	36578000	46235000	77511000	62982000	39268000	44422000	54520000	34526000	38176000	35981000	34414000	63301000	33274000	55554000	36017000	39478000	47540000	60541000	42720000	44008000	46847000	33824000	35980000
P62071	P62071	Ras-related protein R-Ras2	Rras2	sp|P62071|RRAS2_MOUSE Ras-related protein R-Ras2 OS=Mus musculus OX=10090 GN=Rras2 PE=1 SV=1	1	10600000	430182	9943600	356080	9179800	499532	13501000	15766000	13896000	25647000	14762000	361612	8227800	13630000	19177000	13384000	18996000	6764300	10259000	9892400	12987000	13535000	6171400	10518000	13351000	11118000	11900000	9065200	12221000	9790500	13704000	11292000
P62311	P62311	U6 snRNA-associated Sm-like protein LSm3	Lsm3	sp|P62311|LSM3_MOUSE U6 snRNA-associated Sm-like protein LSm3 OS=Mus musculus OX=10090 GN=Lsm3 PE=1 SV=2	1	82381000	62622000	73957000	90825000	46930000	97606000	52887000	96702000	72462000	89408000	88872000	69399000	61117000	74432000	104990000	102890000	68478000	34528000	69325000	34678000	91491000	63146000	61415000	78561000	65094000	70188000	54787000	76714000	37580000	66824000	64689000	63821000
P62342	P62342	Selenoprotein T	Selt	sp|P62342|SELT_MOUSE Thioredoxin reductase-like selenoprotein T OS=Mus musculus OX=10090 GN=Selenot PE=1 SV=2	2	2014200	3062400	2705300	2251000	3578900	2316900	2700200	2637400	2142200	3305700	336680	2525800	2177100	2577400	2592300	1814900	3156400	2149400	2344300	3615500	3341900	2721300	2193200	3021500	466503	2461800	451250	415610	620123	2707100	2810700	3669400
P62737	P62737;P63268;A0A494B9T3;D3YZY0;D3Z2K3;A0A0U1RQ96	Actin, aortic smooth muscle;Actin, gamma-enteric smooth muscle	Acta2;Actg2	sp|P62737|ACTA_MOUSE Actin, aortic smooth muscle OS=Mus musculus OX=10090 GN=Acta2 PE=1 SV=1;sp|P63268|ACTH_MOUSE Actin, gamma-enteric smooth muscle OS=Mus musculus OX=10090 GN=Actg2 PE=1 SV=1;tr|A0A494B9T3|A0A494B9T3_MOUSE Actin, aortic smooth muscle (Fra	1	4169900	430182	396905	4765100	4325200	15809000	2238100	5514700	360188	2963200	336680	361612	400566	6439800	409718	389028	342233	8460500	5512300	746728	580933	385656	3597500	478808	466503	4187800	451250	415610	620123	330431	325998	448316
P62821	P62821	Ras-related protein Rab-1A	Rab1A	sp|P62821|RAB1A_MOUSE Ras-related protein Rab-1A OS=Mus musculus OX=10090 GN=Rab1A PE=1 SV=3	1	44956000	58126000	47138000	51371000	47497000	55546000	35135000	69492000	43669000	59712000	48996000	51707000	51909000	39487000	48546000	61198000	50216000	23710000	64511000	26190000	58115000	50016000	61204000	57150000	38583000	55643000	49059000	48764000	31400000	56989000	35465000	50198000
P62892	P62892	60S ribosomal protein L39	Rpl39	sp|P62892|RL39_MOUSE 60S ribosomal protein L39 OS=Mus musculus OX=10090 GN=Rpl39 PE=1 SV=2	1	38811000	19338000	24102000	20760000	25853000	27072000	29551000	21969000	21255000	19179000	21898000	16071000	19383000	21080000	22708000	21792000	27536000	41314000	17800000	36872000	27337000	18972000	21602000	30200000	35795000	22929000	21114000	31554000	56908000	20070000	19757000	16348000
P63260	P63260;B1ATY1;G3UYG0;E9Q606	Actin, cytoplasmic 2;Actin, cytoplasmic 2, N-terminally processed	Actg1	sp|P63260|ACTG_MOUSE Actin, cytoplasmic 2 OS=Mus musculus OX=10090 GN=Actg1 PE=1 SV=1	1	19427000	15774000	27896000	18764000	12036000	32494000	18665000	19212000	19770000	20838000	22434000	22674000	12880000	21053000	15041000	18404000	22322000	14232000	14164000	13351000	20106000	20004000	21813000	14409000	15855000	14670000	17479000	11433000	9977100	11421000	21560000	14880000
P68033	P68033;A0A1D5RM20	Actin, alpha cardiac muscle 1	Actc1	sp|P68033|ACTC_MOUSE Actin, alpha cardiac muscle 1 OS=Mus musculus OX=10090 GN=Actc1 PE=1 SV=1	1	490483	430182	396905	356080	346898	11397000	560352	319865	360188	350936	336680	361612	400566	376107	409718	389028	342233	5117200	312879	746728	580933	385656	323890	478808	466503	4659800	451250	415610	620123	330431	325998	448316
P68369	P68369;P05214	Tubulin alpha-1A chain;Tubulin alpha-3 chain	Tuba1a;Tuba3a	sp|P68369|TBA1A_MOUSE Tubulin alpha-1A chain OS=Mus musculus OX=10090 GN=Tuba1a PE=1 SV=1;sp|P05214|TBA3_MOUSE Tubulin alpha-3 chain OS=Mus musculus OX=10090 GN=Tuba3a PE=1 SV=1	1	490483	430182	396905	356080	346898	499532	560352	319865	360188	350936	336680	361612	400566	376107	409718	389028	342233	747486	312879	746728	580933	385656	323890	478808	466503	344674	451250	415610	620123	330431	325998	448316
P68373	P68373	Tubulin alpha-1C chain	Tuba1c	sp|P68373|TBA1C_MOUSE Tubulin alpha-1C chain OS=Mus musculus OX=10090 GN=Tuba1c PE=1 SV=1	1	490483	430182	396905	13649000	346898	499532	560352	319865	360188	350936	336680	361612	400566	376107	409718	389028	342233	31715000	312879	26769000	580933	385656	323890	478808	466503	344674	451250	415610	31317000	330431	325998	448316
P70255-2	P70255-2;A0A1Y7VK55;P70255-3;P70255;P70255-5;P70255-4;P70255-7;P70255-6	Nuclear factor 1 C-type	Nfic	sp|P70255-2|NFIC_MOUSE Isoform 2 of Nuclear factor 1 C-type OS=Mus musculus OX=10090 GN=Nfic;tr|A0A1Y7VK55|A0A1Y7VK55_MOUSE Nuclear factor 1 OS=Mus musculus OX=10090 GN=Nfic PE=1 SV=1;sp|P70255-3|NFIC_MOUSE Isoform 3 of Nuclear factor 1 C-type OS=Mus muscu	4	4504200	4718100	6035700	5327700	4454800	5781100	4582000	319865	4639800	5390100	5987200	6795600	6694500	5843000	5093700	7011200	342233	4711700	312879	5518200	7724700	7449200	323890	3597500	466503	5995000	4218500	4687400	6257500	5690700	325998	448316
P70372	P70372	ELAV-like protein 1	Elavl1	sp|P70372|ELAV1_MOUSE ELAV-like protein 1 OS=Mus musculus OX=10090 GN=Elavl1 PE=1 SV=2	3	490483	6495800	396905	7467400	346898	7076100	8464600	319865	6617400	14194000	10815000	361612	14926000	12139000	8477400	389028	9811300	27145000	11685000	22629000	580933	10090000	10872000	10474000	9079400	11876000	451250	9949800	37903000	8520600	11191000	448316
P70436	P70436	Homeobox protein DLX-4	Dlx4	sp|P70436|DLX4_MOUSE Homeobox protein DLX-4 OS=Mus musculus OX=10090 GN=Dlx4 PE=2 SV=2	1	3374900	3147500	3308400	3903700	3196000	2596200	3228300	319865	3476500	350936	336680	4013900	3291000	3868100	3178200	3528300	3844100	747486	3188500	746728	580933	3742700	3823000	3036400	3804500	4131700	3879900	415610	620123	330431	325998	3709100
P70445	P70445	Eukaryotic translation initiation factor 4E-binding protein 2	Eif4ebp2	sp|P70445|4EBP2_MOUSE Eukaryotic translation initiation factor 4E-binding protein 2 OS=Mus musculus OX=10090 GN=Eif4ebp2 PE=1 SV=1	1	490483	21536000	21177000	18690000	16841000	499532	12949000	24999000	15293000	16097000	22079000	18912000	400566	376107	17666000	21978000	342233	747486	312879	746728	580933	13579000	323890	17766000	17044000	19753000	12301000	18219000	620123	330431	15487000	14302000
P84104-2	P84104-2;P84104	Serine/arginine-rich splicing factor 3	Srsf3	sp|P84104-2|SRSF3_MOUSE Isoform Short of Serine/arginine-rich splicing factor 3 OS=Mus musculus OX=10090 GN=Srsf3;sp|P84104|SRSF3_MOUSE Serine/arginine-rich splicing factor 3 OS=Mus musculus OX=10090 GN=Srsf3 PE=1 SV=1	1	125380000	117130000	121850000	99498000	98046000	142120000	106450000	142630000	102490000	107270000	127830000	105130000	102780000	124760000	91648000	116800000	126350000	69968000	100810000	71704000	149580000	97657000	85155000	124520000	116670000	132820000	98091000	115830000	113550000	104610000	126610000	117430000
P97390	P97390	Vacuolar protein sorting-associated protein 45	Vps45	sp|P97390|VPS45_MOUSE Vacuolar protein sorting-associated protein 45 OS=Mus musculus OX=10090 GN=Vps45 PE=1 SV=1	3	490483	430182	396905	356080	346898	499532	560352	319865	360188	350936	336680	361612	400566	376107	409718	389028	342233	747486	312879	746728	580933	385656	323890	478808	466503	344674	451250	415610	620123	330431	325998	448316
P97457	P97457;A0A0U1RP93;A0A0U1RQ36;F6ULR7	Myosin regulatory light chain 2, skeletal muscle isoform	Mylpf	sp|P97457|MLRS_MOUSE Myosin regulatory light chain 2, skeletal muscle isoform OS=Mus musculus OX=10090 GN=Mylpf PE=1 SV=3;tr|A0A0U1RP93|A0A0U1RP93_MOUSE Myosin regulatory light chain 2, skeletal muscle isoform OS=Mus musculus OX=10090 GN=Mylpf PE=1 SV=1;tr	10	490483	430182	396905	356080	11264000	3072200	560352	1887800	360188	350936	336680	361612	77309000	376107	409718	389028	342233	747486	312879	746728	580933	385656	323890	478808	53379000	344674	451250	415610	620123	330431	325998	448316
P97471	P97471	Mothers against decapentaplegic homolog 4	Smad4	sp|P97471|SMAD4_MOUSE Mothers against decapentaplegic homolog 4 OS=Mus musculus OX=10090 GN=Smad4 PE=1 SV=2	1	1624500	3885700	2041000	2837800	2179800	2244700	560352	2388600	360188	1099800	2068100	2604000	1902600	376107	2210400	2808200	3252600	1652300	2518800	3488100	580933	2483400	2114400	3047300	2590200	2666600	1922100	1685700	2104600	1692200	1710900	1568500
P97501	P97501;J3QMN6	Dimethylaniline monooxygenase [N-oxide-forming] 3	Fmo3	sp|P97501|FMO3_MOUSE Dimethylaniline monooxygenase [N-oxide-forming] 3 OS=Mus musculus OX=10090 GN=Fmo3 PE=1 SV=1	10	490483	2570300	7550300	17837000	21521000	4079400	64785000	19981000	14976000	12189000	12875000	11165000	13485000	18638000	17536000	28540000	342233	747486	312879	746728	580933	385656	1220400	478808	466503	344674	451250	415610	620123	330431	325998	448316
P97503	P97503	Homeobox protein Nkx-3.2	Nkx3-2	sp|P97503|NKX32_MOUSE Homeobox protein Nkx-3.2 OS=Mus musculus OX=10090 GN=Nkx3-2 PE=1 SV=2	1	4566200	430182	396905	4595200	346898	4910500	6434700	5709600	360188	350936	336680	6379600	6508300	376107	409718	6088000	342233	13426000	4355800	746728	580933	6694300	7492200	478808	466503	344674	6435000	415610	10850000	330431	325998	7079500
P97822-2	P97822-2;P97822;E9Q5H2;E9PZF5;E9Q0X5;E9Q2G1	Acidic leucine-rich nuclear phosphoprotein 32 family member E	Anp32e	sp|P97822-2|AN32E_MOUSE Isoform 2 of Acidic leucine-rich nuclear phosphoprotein 32 family member E OS=Mus musculus OX=10090 GN=Anp32e;sp|P97822|AN32E_MOUSE Acidic leucine-rich nuclear phosphoprotein 32 family member E OS=Mus musculus OX=10090 GN=Anp32e PE=	3	5917200	9348100	13376000	9776000	11375000	10828000	8539000	319865	8307100	10262000	10672000	10794000	7553200	10565000	7895300	11235000	342233	8159600	9651200	7611300	580933	12275000	9839500	478808	466503	10906000	8828100	415610	620123	9215500	8107200	10633000
Q00977	Q00977	Gap junction beta-2 protein	Gjb2	sp|Q00977|CXB2_MOUSE Gap junction beta-2 protein OS=Mus musculus OX=10090 GN=Gjb2 PE=1 SV=1	1	3566600	430182	396905	356080	346898	3167300	6357700	319865	360188	350936	3080100	361612	1098800	3472000	409718	389028	342233	15012000	312879	18725000	580933	385656	323890	478808	466503	344674	2726700	415610	14654000	330431	325998	448316
Q01149	Q01149	Collagen alpha-2(I) chain	Col1a2	sp|Q01149|CO1A2_MOUSE Collagen alpha-2(I) chain OS=Mus musculus OX=10090 GN=Col1a2 PE=1 SV=2	1	490483	2927100	2092400	356080	346898	5114700	560352	2062400	360188	1538600	3656800	3577400	3557200	3137100	4429200	4314100	342233	747486	312879	746728	580933	2069400	323890	478808	466503	3160200	451250	415610	1509200	2991100	325998	448316
Q04519	Q04519	Sphingomyelin phosphodiesterase	Smpd1	sp|Q04519|ASM_MOUSE Sphingomyelin phosphodiesterase OS=Mus musculus OX=10090 GN=Smpd1 PE=1 SV=2	2	490483	5897900	396905	356080	5460600	499532	560352	319865	360188	350936	3631500	361612	400566	4147100	409718	389028	5729400	4998500	312879	746728	8398200	5485300	9513100	8855600	12734000	344674	451250	10487000	620123	5466200	5427100	448316
Q04736	Q04736;F8WI90;P05480;D3YZ57;E9Q696;P06240;P39688-2;P39688	Tyrosine-protein kinase Yes;Neuronal proto-oncogene tyrosine-protein kinase Src	Yes1;Src	sp|Q04736|YES_MOUSE Tyrosine-protein kinase Yes OS=Mus musculus OX=10090 GN=Yes1 PE=1 SV=3;tr|F8WI90|F8WI90_MOUSE Tyrosine-protein kinase OS=Mus musculus OX=10090 GN=Src PE=1 SV=1;sp|P05480|SRC_MOUSE Neuronal proto-oncogene tyrosine-protein kinase Src OS=M	3	490483	430182	396905	356080	346898	499532	560352	319865	360188	350936	336680	361612	400566	376107	409718	389028	342233	2823000	312879	2196500	580933	385656	323890	478808	466503	344674	451250	415610	2852500	330431	325998	448316
Q05020	Q05020	Apolipoprotein C-II	Apoc2	sp|Q05020|APOC2_MOUSE Apolipoprotein C-II OS=Mus musculus OX=10090 GN=Apoc2 PE=2 SV=1	1	3390000	6148600	5249400	6618600	4231800	3434500	6823700	6570400	7503100	5165500	5922000	5951200	5795200	7997600	5219900	4624800	9952400	5799200	8194000	4645500	6707200	9013500	8034400	6880400	7605500	5550700	10878000	5042600	7605600	8315400	11477000	10224000
Q05186	Q05186	Reticulocalbin-1	Rcn1	sp|Q05186|RCN1_MOUSE Reticulocalbin-1 OS=Mus musculus OX=10090 GN=Rcn1 PE=1 SV=1	2	9469900	430182	10907000	17920000	10104000	15606000	8126000	13880000	12127000	8886700	12707000	11450000	11861000	14571000	11699000	7200500	7783400	5719800	312879	746728	10441000	9781300	323890	478808	11021000	13544000	451250	8393700	620123	11317000	9485500	448316
Q05BF0	Q05BF0;Q9CQA6	Coiled-coil-helix-coiled-coil-helix domain-containing protein 1	Chchd1	tr|Q05BF0|Q05BF0_MOUSE Chchd1 protein OS=Mus musculus OX=10090 GN=Chchd1 PE=1 SV=1;sp|Q9CQA6|CHCH1_MOUSE Coiled-coil-helix-coiled-coil-helix domain-containing protein 1 OS=Mus musculus OX=10090 GN=Chchd1 PE=1 SV=1	1	12324000	8470000	9463200	7013500	12493000	10196000	11331000	11541000	9777900	5448400	10461000	10771000	7690800	8681000	9635000	10107000	14945000	7003500	9265800	746728	8218400	11463000	10043000	9496900	11675000	13667000	13621000	9033000	10199000	7478200	11265000	9081400
Q06138	Q06138	Calcium-binding protein 39	Cab39	sp|Q06138|CAB39_MOUSE Calcium-binding protein 39 OS=Mus musculus OX=10090 GN=Cab39 PE=1 SV=2	5	490483	7082800	8164700	7524800	5353900	4799500	7972100	8621600	6292400	10560000	5375300	6338600	5793300	5497300	6555700	5714800	5712500	12259000	7716800	19628000	5780100	385656	3784700	6060000	8794800	8045300	5129000	5480300	33680000	8571600	5083500	6975500
Q08288	Q08288	Cell growth-regulating nucleolar protein	Lyar	sp|Q08288|LYAR_MOUSE Cell growth-regulating nucleolar protein OS=Mus musculus OX=10090 GN=Lyar PE=1 SV=2	1	659960	462690	318970	356080	712480	771050	443530	319865	592900	350936	336680	434290	425540	376107	409718	601660	509290	747486	312879	359600	299610	402470	323890	478808	575030	509410	597380	584940	620123	546570	582290	701160
Q09200	Q09200;A0A1W2P6F0	Beta-1,4 N-acetylgalactosaminyltransferase 1	B4galnt1	sp|Q09200|B4GN1_MOUSE Beta-1,4 N-acetylgalactosaminyltransferase 1 OS=Mus musculus OX=10090 GN=B4galnt1 PE=1 SV=1;tr|A0A1W2P6F0|A0A1W2P6F0_MOUSE Beta-1,4 N-acetylgalactosaminyltransferase 1 OS=Mus musculus OX=10090 GN=B4galnt1 PE=1 SV=1	3	4311900	7785700	4451100	356080	7321700	5053500	4365400	3065700	6325100	350936	8841600	6692600	6344800	376107	409718	389028	342233	747486	312879	6206700	7211200	7112000	323890	478808	7768600	5522500	451250	3871500	620123	330431	325998	448316
Q14C51	Q14C51	Pentatricopeptide repeat domain-containing protein 3, mitochondrial	Ptcd3	sp|Q14C51|PTCD3_MOUSE Pentatricopeptide repeat domain-containing protein 3, mitochondrial OS=Mus musculus OX=10090 GN=Ptcd3 PE=1 SV=2	4	490483	1448700	2662900	1534600	1014100	1022900	1608200	1013000	1168100	3248200	336680	361612	400566	1401600	2021300	2672500	342233	10959000	1371800	5950300	580933	2725800	3782700	478808	2270600	344674	1949500	415610	25778000	1404800	1385400	1207600
Q14DH7	Q14DH7;Q14DH7-2	Acyl-CoA synthetase short-chain family member 3, mitochondrial	Acss3	sp|Q14DH7|ACSS3_MOUSE Acyl-CoA synthetase short-chain family member 3, mitochondrial OS=Mus musculus OX=10090 GN=Acss3 PE=1 SV=2;sp|Q14DH7-2|ACSS3_MOUSE Isoform 2 of Acyl-CoA synthetase short-chain family member 3, mitochondrial OS=Mus musculus OX=10090 GN	10	13102000	15165000	17395000	16216000	12980000	499532	27207000	7951300	17215000	28684000	16603000	16751000	14557000	7283300	20618000	18501000	8403600	63811000	20228000	57595000	580933	9381500	6465800	478808	466503	344674	8279100	415610	18715000	14997000	9981200	6910400
Q31125	Q31125	Zinc transporter SLC39A7	Slc39a7	sp|Q31125|S39A7_MOUSE Zinc transporter SLC39A7 OS=Mus musculus OX=10090 GN=Slc39a7 PE=1 SV=2	2	490483	12943000	396905	11884000	13714000	21824000	7729800	319865	360188	14126000	336680	361612	13316000	12550000	19361000	389028	342233	17400000	19013000	23236000	4403400	15878000	323890	14687000	16059000	16787000	14152000	10290000	13923000	14435000	18276000	15371000
Q3T9X0-2	Q3T9X0-2;Q3T9X0	Solute carrier family 2, facilitated glucose transporter member 9	Slc2a9	sp|Q3T9X0-2|GTR9_MOUSE Isoform 2 of Solute carrier family 2, facilitated glucose transporter member 9 OS=Mus musculus OX=10090 GN=Slc2a9;sp|Q3T9X0|GTR9_MOUSE Solute carrier family 2, facilitated glucose transporter member 9 OS=Mus musculus OX=10090 GN=Slc2	2	56686000	430182	71924000	62867000	346898	499532	29499000	319865	74152000	71907000	71929000	63318000	62889000	66392000	57669000	38210000	84743000	90432000	92303000	91308000	580933	84295000	61753000	92172000	60966000	43999000	78701000	69906000	89239000	58621000	76461000	80022000
Q3TAW3	Q3TAW3;E9Q296;Q8C178;Q9EPL9;D3Z2N6	Acyl-coenzyme A oxidase;Peroxisomal acyl-coenzyme A oxidase 3	Acox3	tr|Q3TAW3|Q3TAW3_MOUSE Acyl-coenzyme A oxidase OS=Mus musculus OX=10090 GN=Acox3 PE=1 SV=1;tr|E9Q296|E9Q296_MOUSE Acyl-coenzyme A oxidase OS=Mus musculus OX=10090 GN=Acox3 PE=1 SV=2;tr|Q8C178|Q8C178_MOUSE Acyl-coenzyme A oxidase OS=Mus musculus OX=10090 GN	3	490483	430182	396905	356080	346898	499532	560352	319865	360188	350936	336680	361612	400566	376107	409718	389028	342233	6887200	312879	4313300	580933	2234300	2085000	2571900	466503	344674	451250	1364900	5191200	330431	1767200	448316
Q3TCH7	Q3TCH7;E9PXT5;F6UV36	Cullin-4A	Cul4a	sp|Q3TCH7|CUL4A_MOUSE Cullin-4A OS=Mus musculus OX=10090 GN=Cul4a PE=1 SV=1	6	490483	430182	256150	352320	183430	499532	563940	117290	109950	300920	132640	361612	400566	214920	343300	389028	51276	9102500	132180	19868000	580933	104390	251210	478808	420360	106530	451250	415610	6916300	109850	252810	90807
Q3TDN2-2	Q3TDN2-2;Q3TDN2;D3YUP4;F6XLD9;D3Z4G9;D3Z2H4	FAS-associated factor 2	Faf2	sp|Q3TDN2-2|FAF2_MOUSE Isoform 2 of FAS-associated factor 2 OS=Mus musculus OX=10090 GN=Faf2;sp|Q3TDN2|FAF2_MOUSE FAS-associated factor 2 OS=Mus musculus OX=10090 GN=Faf2 PE=1 SV=2;tr|D3YUP4|D3YUP4_MOUSE FAS-associated factor 2 (Fragment) OS=Mus musculus O	4	490483	430182	396905	356080	346898	499532	560352	319865	360188	350936	336680	361612	400566	376107	1436600	1078000	342233	19253000	312879	16553000	580933	385656	323890	478808	2314000	344674	451250	415610	16691000	330431	325998	448316
Q3TIU4	Q3TIU4	2,5-phosphodiesterase 12	Pde12	sp|Q3TIU4|PDE12_MOUSE 2,5-phosphodiesterase 12 OS=Mus musculus OX=10090 GN=Pde12 PE=1 SV=2	1	490483	430182	396905	356080	346898	499532	560352	319865	360188	350936	336680	361612	400566	376107	409718	389028	342233	1509100	312879	1111400	580933	385656	323890	478808	466503	344674	451250	415610	1232300	330431	325998	448316
Q3TJ55	Q3TJ55;Q80W45;Q00262	Syntaxin-2	Stx2	tr|Q3TJ55|Q3TJ55_MOUSE Syntaxin-2 OS=Mus musculus OX=10090 GN=Stx2 PE=1 SV=1;tr|Q80W45|Q80W45_MOUSE Syntaxin-2 OS=Mus musculus OX=10090 GN=Stx2 PE=1 SV=1;sp|Q00262|STX2_MOUSE Syntaxin-2 OS=Mus musculus OX=10090 GN=Stx2 PE=1 SV=1	2	490483	430182	396905	356080	346898	499532	560352	2710000	360188	350936	336680	361612	400566	2969500	409718	389028	342233	747486	312879	746728	580933	385656	323890	478808	2569100	344674	451250	2536800	620123	330431	325998	448316
Q3TL44	Q3TL44;A0A1L1ST78;A0A1L1SQN7	NLR family member X1	Nlrx1	sp|Q3TL44|NLRX1_MOUSE NLR family member X1 OS=Mus musculus OX=10090 GN=Nlrx1 PE=1 SV=1;tr|A0A1L1ST78|A0A1L1ST78_MOUSE NLR family member X1 (Fragment) OS=Mus musculus OX=10090 GN=Nlrx1 PE=1 SV=1;tr|A0A1L1SQN7|A0A1L1SQN7_MOUSE NLR family member X1 (Fragment)	4	490483	430182	18436000	20876000	346898	18256000	14885000	18077000	18052000	11899000	17227000	20671000	15358000	18934000	18174000	12252000	342233	22507000	312879	13950000	580933	385656	16997000	478808	466503	344674	451250	415610	12422000	12773000	325998	17134000
Q3TPM3	Q3TPM3;Q9WTX6;A0A0N4SUW1;D3Z2H3	Cullin-1	Cul1	tr|Q3TPM3|Q3TPM3_MOUSE Cullin-1 (Fragment) OS=Mus musculus OX=10090 GN=Cul1 PE=1 SV=1;sp|Q9WTX6|CUL1_MOUSE Cullin-1 OS=Mus musculus OX=10090 GN=Cul1 PE=1 SV=1;tr|A0A0N4SUW1|A0A0N4SUW1_MOUSE Cullin-1 OS=Mus musculus OX=10090 GN=Cul1 PE=1 SV=1;tr|D3Z2H3|D3Z2	2	490483	430182	396905	356080	346898	499532	560352	319865	360188	350936	336680	361612	400566	376107	409718	389028	342233	4342300	312879	4760500	580933	385656	323890	478808	466503	344674	451250	415610	6218600	330431	325998	448316
Q3TQS1	Q3TQS1;A0A0A6YWC2;F6U5V1	La ribonucleoprotein domain family, member 1B	Larp1b	tr|Q3TQS1|Q3TQS1_MOUSE La ribonucleoprotein domain family, member 1B OS=Mus musculus OX=10090 GN=Larp1b PE=1 SV=1;tr|A0A0A6YWC2|A0A0A6YWC2_MOUSE La ribonucleoprotein domain family, member 1B OS=Mus musculus OX=10090 GN=Larp1b PE=1 SV=1;tr|F6U5V1|F6U5V1_MOU	1	490483	2758600	2128300	356080	2786100	499532	2735000	319865	2097100	2735400	336680	2451700	400566	376107	2762500	2324700	342233	3823200	312879	5159100	580933	3499000	4821300	478808	4154600	344674	451250	2959200	3698900	2130600	3948900	2794500
Q3TSG4	Q3TSG4	RNA demethylase ALKBH5	Alkbh5	sp|Q3TSG4|ALKB5_MOUSE RNA demethylase ALKBH5 OS=Mus musculus OX=10090 GN=Alkbh5 PE=1 SV=2	1	490483	430182	8530700	6420900	8624300	9090900	7963800	9789400	6176400	6605300	7363200	10488000	8878800	5276900	10059000	10143000	7393000	747486	6654700	7925500	12261000	5485400	8458700	9299500	6855400	344674	9248300	415610	5132400	330431	325998	8133000
Q3TWV4	Q3TWV4;P84091;A0A338P6T4;A0A338P798	AP-2 complex subunit mu	Ap2m1	tr|Q3TWV4|Q3TWV4_MOUSE AP-2 complex subunit mu OS=Mus musculus OX=10090 GN=Ap2m1 PE=1 SV=1;sp|P84091|AP2M1_MOUSE AP-2 complex subunit mu OS=Mus musculus OX=10090 GN=Ap2m1 PE=1 SV=1	8	490483	4281900	4402100	356080	346898	499532	5383100	319865	2067400	4660300	336680	361612	400566	376107	409718	389028	342233	40164000	312879	56330000	580933	385656	3864600	478808	1546000	344674	451250	415610	90139000	2109400	2621300	448316
Q3TYS2	Q3TYS2	Uncharacterized protein C17orf62 homolog		sp|Q3TYS2|CYBC1_MOUSE Cytochrome b-245 chaperone 1 OS=Mus musculus OX=10090 GN=Cybc1 PE=1 SV=2	1	490483	430182	396905	356080	346898	499532	560352	319865	360188	350936	336680	361612	400566	376107	409718	389028	342233	3906200	312879	746728	580933	385656	323890	478808	466503	344674	451250	415610	4201900	330431	325998	448316
Q3TYX3	Q3TYX3	SET and MYND domain-containing protein 5	Smyd5	sp|Q3TYX3|SMYD5_MOUSE SET and MYND domain-containing protein 5 OS=Mus musculus OX=10090 GN=Smyd5 PE=1 SV=2	3	10859000	10881000	8789600	356080	18331000	12994000	9058600	12218000	11096000	350936	11742000	13554000	11453000	9016500	10793000	15856000	11333000	8337200	10748000	9696300	13587000	385656	11518000	11909000	11632000	15351000	18817000	7881000	8821000	10774000	13451000	6591900
Q3U2P1	Q3U2P1;Q3U2P1-2	Protein transport protein Sec24A	Sec24a	sp|Q3U2P1|SC24A_MOUSE Protein transport protein Sec24A OS=Mus musculus OX=10090 GN=Sec24a PE=1 SV=1	10	490483	430182	396905	356080	346898	499532	473420	319865	51779	350936	336680	361612	400566	376107	409718	389028	342233	22677000	312879	26279000	580933	385656	168330	478808	142460	344674	451250	415610	24796000	51395	114990	448316
Q3U3G8	Q3U3G8;Q9EPB5	Serine hydrolase-like protein	Serhl	tr|Q3U3G8|Q3U3G8_MOUSE Serine hydrolase-like protein OS=Mus musculus OX=10090 GN=Serhl PE=1 SV=1;sp|Q9EPB5|SERHL_MOUSE Serine hydrolase-like protein OS=Mus musculus OX=10090 GN=Serhl PE=1 SV=1	1	490483	430182	396905	356080	346898	499532	560352	319865	360188	350936	336680	361612	400566	376107	409718	389028	342233	4898400	312879	6959000	580933	385656	323890	478808	466503	344674	451250	415610	620123	330431	325998	448316
Q3U3V1	Q3U3V1;O88947	Coagulation factor X;Factor X light chain;Factor X heavy chain;Activated factor Xa heavy chain	F10	tr|Q3U3V1|Q3U3V1_MOUSE Coagulation factor X OS=Mus musculus OX=10090 GN=F10 PE=1 SV=1;sp|O88947|FA10_MOUSE Coagulation factor X OS=Mus musculus OX=10090 GN=F10 PE=1 SV=1	2	490483	972480	1041100	356080	346898	768400	560352	319865	360188	350936	336680	1179900	400566	376107	409718	389028	342233	1528900	312879	1165700	580933	1287200	323890	478808	1149400	1118000	451250	415610	620123	330431	325998	1094200
Q3U7R1	Q3U7R1;Q3U7R1-2;A0A1W2P784	Extended synaptotagmin-1	Esyt1	sp|Q3U7R1|ESYT1_MOUSE Extended synaptotagmin-1 OS=Mus musculus OX=10090 GN=Esyt1 PE=1 SV=2;sp|Q3U7R1-2|ESYT1_MOUSE Isoform 2 of Extended synaptotagmin-1 OS=Mus musculus OX=10090 GN=Esyt1;tr|A0A1W2P784|A0A1W2P784_MOUSE Extended synaptotagmin-1 (Fragment) OS	5	490483	5579800	7476800	4302900	6386900	5031500	6456300	4955900	4314000	5177800	4731400	5551900	5972300	4293300	5162300	5836800	4015900	8021100	5501300	7247300	4839200	4740300	7020800	478808	6804900	4946800	5989000	4864200	4686400	6426100	6366100	4319200
Q3UDE2	Q3UDE2;F2Z423	Tubulin--tyrosine ligase-like protein 12	Ttll12	sp|Q3UDE2|TTL12_MOUSE Tubulin--tyrosine ligase-like protein 12 OS=Mus musculus OX=10090 GN=Ttll12 PE=1 SV=1	3	12246000	430182	7240800	8199600	346898	8479500	11351000	319865	6635700	9134500	336680	9915300	10992000	8166200	9840800	10465000	7822100	9103000	12566000	10299000	580933	385656	9645900	478808	9262600	8017600	8847600	415610	10725000	14066000	6752100	10500000
Q3UED7	Q3UED7	Interferon-gamma-inducible GTPase Ifgga2 protein	Gm4951	tr|Q3UED7|Q3UED7_MOUSE Interferon-gamma-inducible GTPase Ifgga2 protein OS=Mus musculus OX=10090 GN=Gm4951 PE=1 SV=1	2	490483	162240	260110	272560	293030	499532	1232700	191950	143290	476620	185950	107560	400566	376107	409718	389028	146100	6775000	89108	8631200	580933	256340	763220	351510	965570	344674	451250	415610	2711700	738260	124730	448316
Q3UF75	Q3UF75;Q9EPC1	Alpha-parvin	Parva	tr|Q3UF75|Q3UF75_MOUSE Alpha-parvin OS=Mus musculus OX=10090 GN=Parva PE=1 SV=1;sp|Q9EPC1|PARVA_MOUSE Alpha-parvin OS=Mus musculus OX=10090 GN=Parva PE=1 SV=1	3	490483	2809800	4348100	3196600	3140900	2930200	5074000	2735800	3896400	3656200	3755800	4039000	3752100	3741000	4048400	3958900	2697900	11547000	3050700	10433000	580933	2979300	4573500	3184600	5601600	6225100	4955000	3128700	10722000	5016900	5311300	2993500
Q3UHN9	Q3UHN9;Q3UHN9-2;E9PZJ4;Q9EQH7-2;Q9EQW8;Q9EQH7	Bifunctional heparan sulfate N-deacetylase/N-sulfotransferase 1;Heparan sulfate N-deacetylase 1;Heparan sulfate N-sulfotransferase 1	Ndst1	sp|Q3UHN9|NDST1_MOUSE Bifunctional heparan sulfate N-deacetylase/N-sulfotransferase 1 OS=Mus musculus OX=10090 GN=Ndst1 PE=1 SV=2;sp|Q3UHN9-2|NDST1_MOUSE Isoform 2 of Bifunctional heparan sulfate N-deacetylase/N-sulfotransferase 1 OS=Mus musculus OX=10090	3	3331400	5659200	3862600	5025700	346898	4922800	4168400	3399100	360188	2883000	4992100	5598100	3453200	3509100	4481600	4391400	3717900	747486	3013900	2235100	580933	385656	5990300	478808	4585400	4804100	5392700	4959700	2125000	4180100	325998	448316
Q3UHX9-2	Q3UHX9-2;Q3UHX9	Putative methyltransferase C9orf114 homolog	D2Wsu81e	sp|Q3UHX9-2|CI114_MOUSE Isoform 2 of Putative methyltransferase C9orf114 homolog OS=Mus musculus OX=10090 GN=Spout1;sp|Q3UHX9|CI114_MOUSE Putative methyltransferase C9orf114 homolog OS=Mus musculus OX=10090 GN=Spout1 PE=1 SV=1	1	15307000	16041000	15849000	16450000	16908000	19104000	18901000	15741000	17587000	18561000	15198000	16484000	18631000	14094000	21489000	12912000	18253000	14960000	14978000	13978000	25807000	13918000	16326000	22151000	466503	16479000	17535000	13659000	16255000	16745000	14239000	14081000
Q3UKN6	Q3UKN6;P81117	Nucleobindin-2;Nesfatin-1	Nucb2	tr|Q3UKN6|Q3UKN6_MOUSE Nucleobindin-2 OS=Mus musculus OX=10090 GN=Nucb2 PE=1 SV=1;sp|P81117|NUCB2_MOUSE Nucleobindin-2 OS=Mus musculus OX=10090 GN=Nucb2 PE=1 SV=2	5	5513600	4072500	3931000	5703600	5067800	10750000	4302800	5579600	360188	350936	5521100	5910600	6394100	6115700	6117500	6658200	4385800	747486	5510700	746728	8001300	4063900	8967300	8553800	14263000	9208800	451250	10502000	620123	5559200	4243100	3370500
Q3ULW8-2	Q3ULW8-2;Q3ULW8;A0A5H1ZRP0;A0A5H1ZRL8;A0A5H1ZRL5	Protein mono-ADP-ribosyltransferase PARP3	Parp3	sp|Q3ULW8-2|PARP3_MOUSE Isoform 2 of Protein mono-ADP-ribosyltransferase PARP3 OS=Mus musculus OX=10090 GN=Parp3;sp|Q3ULW8|PARP3_MOUSE Protein mono-ADP-ribosyltransferase PARP3 OS=Mus musculus OX=10090 GN=Parp3 PE=2 SV=1;tr|A0A5H1ZRP0|A0A5H1ZRP0_MOUSE Poly	3	5147600	6317200	5742800	4275500	4447600	499532	4773900	3513400	2797900	5447500	3679000	5273100	7448600	5751000	3751900	389028	3817900	6192000	5890300	7025800	580933	3125500	4785100	478808	4457200	8340900	5995900	6428300	5910300	4860900	4998800	3065400
Q3UNZ8	Q3UNZ8;A0A0A6YWV6;A0A0A6YWZ0;Q3UNZ8-2	Quinone oxidoreductase-like protein 2	BC026585	sp|Q3UNZ8|QORL2_MOUSE Quinone oxidoreductase-like protein 2 OS=Mus musculus OX=10090 GN=Cryzl2 PE=1 SV=1;tr|A0A0A6YWV6|A0A0A6YWV6_MOUSE Quinone oxidoreductase-like protein 2 OS=Mus musculus OX=10090 GN=Cryzl2 PE=1 SV=1	5	490483	430182	396905	649460	346898	499532	5330800	319865	360188	350936	336680	361612	400566	376107	409718	389028	342233	40347000	312879	35029000	580933	385656	323890	478808	1292100	344674	451250	415610	16052000	330431	325998	448316
Q3UP75	Q3UP75	UDP-glucuronosyltransferase 3A1	Ugt3a1	sp|Q3UP75|UD3A1_MOUSE UDP-glucuronosyltransferase 3A1 OS=Mus musculus OX=10090 GN=Ugt3a1 PE=1 SV=1	2	490483	430182	10382000	10094000	5677000	10924000	11317000	7941700	10736000	11309000	11642000	11193000	400566	9820400	9711000	10510000	342233	24553000	10768000	41468000	580933	5106200	9645900	10125000	4724100	8582900	451250	9206000	33369000	10624000	7937400	13515000
Q3URE1	Q3URE1;A0A1D5RMC8;Q3URE1-2	Acyl-CoA synthetase family member 3, mitochondrial	Acsf3	sp|Q3URE1|ACSF3_MOUSE Malonate--CoA ligase ACSF3, mitochondrial OS=Mus musculus OX=10090 GN=Acsf3 PE=1 SV=2;tr|A0A1D5RMC8|A0A1D5RMC8_MOUSE Malonate--CoA ligase ACSF3, mitochondrial OS=Mus musculus OX=10090 GN=Acsf3 PE=1 SV=1	5	490483	5296800	3567800	356080	346898	499532	560352	319865	360188	350936	336680	5526900	400566	376107	409718	389028	342233	7895700	4916400	8132300	580933	385656	323890	4028300	4158400	4501300	451250	415610	5681800	3282400	325998	448316
Q3UTJ2-2	Q3UTJ2-2;Q3UTJ2-4;B9EKP8;B7ZWM6;A0A0R4J1T1;D3Z080;B2RXQ9;A0A0R4J1W0;Q3UTJ2-5;Q3UTJ2-3;Q3UTJ2;A0A0R4J1X5;A0A1B0GRC3;Z4YJR7;Q3UTJ2-7;Q3UTJ2-6;D3Z203	Sorbin and SH3 domain-containing protein 2	Sorbs2	sp|Q3UTJ2-2|SRBS2_MOUSE Isoform 2 of Sorbin and SH3 domain-containing protein 2 OS=Mus musculus OX=10090 GN=Sorbs2;sp|Q3UTJ2-4|SRBS2_MOUSE Isoform 4 of Sorbin and SH3 domain-containing protein 2 OS=Mus musculus OX=10090 GN=Sorbs2;tr|B9EKP8|B9EKP8_MOUSE Sor	2	13073000	8414800	8783600	12378000	11933000	11307000	11705000	319865	8607900	11062000	13781000	12436000	13709000	12011000	9713200	11962000	14172000	16731000	9314800	17923000	580933	13002000	12807000	13317000	20654000	18838000	11101000	15352000	10911000	12372000	11826000	7291100
Q3UVK0	Q3UVK0	Endoplasmic reticulum metallopeptidase 1	Ermp1	sp|Q3UVK0|ERMP1_MOUSE Endoplasmic reticulum metallopeptidase 1 OS=Mus musculus OX=10090 GN=Ermp1 PE=1 SV=2	6	5985000	7836300	5545600	5529000	346898	499532	3816500	319865	5816200	8811500	5749900	361612	400566	376107	409718	389028	12339000	10468000	10495000	9646200	580933	6826400	5291000	478808	6117400	344674	451250	415610	6047000	5129900	8570000	7321900
Q45VK5	Q45VK5;A0A1L1STE4;Q9Z1X4-2;Q9Z1X4;Q9Z1X4-3;A0A1L1SU19;A0A1L1SQR7	Interleukin enhancer-binding factor 3	Ilf3	tr|Q45VK5|Q45VK5_MOUSE Interleukin enhancer-binding factor 3 OS=Mus musculus OX=10090 GN=Ilf3 PE=1 SV=1;tr|A0A1L1STE4|A0A1L1STE4_MOUSE Interleukin enhancer-binding factor 3 OS=Mus musculus OX=10090 GN=Ilf3 PE=1 SV=1;sp|Q9Z1X4-2|ILF3_MOUSE Isoform 2 of Inte	3	2139300	430182	2137800	356080	1962900	499532	560352	319865	1950700	350936	1555800	1220700	400566	1682800	2126600	1741300	2174800	1464700	1537100	1978600	2641600	1745300	1568300	478808	2064100	2153100	2372800	2269800	1700500	2186600	1816900	1835200
Q4PZA2-3	Q4PZA2-3;Q4PZA2-2;Q4PZA2-4;Q4PZA2	Endothelin-converting enzyme 1	Ece1	sp|Q4PZA2-3|ECE1_MOUSE Isoform C of Endothelin-converting enzyme 1 OS=Mus musculus OX=10090 GN=Ece1;sp|Q4PZA2-2|ECE1_MOUSE Isoform A of Endothelin-converting enzyme 1 OS=Mus musculus OX=10090 GN=Ece1;sp|Q4PZA2-4|ECE1_MOUSE Isoform D of Endothelin-convertin	2	1629600	2011400	2226600	356080	2439000	1305100	1678000	1574100	2175000	1599900	2063200	1907200	2165200	1296900	2374400	1695200	342233	2247200	1751200	1984700	580933	2439000	2557300	2011300	3067700	1881700	2779500	1548200	1780300	2149600	1281300	2024800
Q504M2	Q504M2	Pyruvate dehydrogenase phosphatase catalytic subunit 2	Pdp2	tr|Q504M2|Q504M2_MOUSE Pyruvate dehyrogenase phosphatase catalytic subunit 2 OS=Mus musculus OX=10090 GN=Pdp2 PE=1 SV=1	3	2756700	3185100	2519400	2534400	346898	499532	1842600	2862900	1987400	2171500	2069800	361612	1842900	2801400	2153800	2071600	2091100	2407300	2584600	2113700	580933	2194100	3447300	3315700	3059300	3209600	4201400	2326000	2367900	330431	2845800	1810700
Q504N0	Q504N0	Carboxypeptidase A2	Cpa2	sp|Q504N0|CBPA2_MOUSE Carboxypeptidase A2 OS=Mus musculus OX=10090 GN=Cpa2 PE=1 SV=1	3	4766500	430182	396905	356080	346898	4227000	560352	319865	360188	350936	336680	361612	3731700	3159400	409718	389028	342233	747486	312879	746728	580933	385656	323890	478808	466503	344674	451250	1513500	620123	330431	325998	448316
Q505D7	Q505D7;A0A0U1RPB1	Optic atrophy 3 protein homolog	Opa3	sp|Q505D7|OPA3_MOUSE Optic atrophy 3 protein homolog OS=Mus musculus OX=10090 GN=Opa3 PE=1 SV=1	3	490483	430182	396905	356080	346898	6296000	7051600	7782000	360188	9834400	336680	9482800	15008000	376107	409718	389028	342233	16191000	14969000	14716000	580933	385656	323890	478808	7200800	7706500	451250	7272000	15653000	330431	5885200	448316
Q569X9	Q569X9	Cytochrome P450, family 2, subfamily c, polypeptide 67	Cyp2c67	tr|Q569X9|Q569X9_MOUSE Cytochrome P450, family 2, subfamily c, polypeptide 67 OS=Mus musculus OX=10090 GN=Cyp2c67 PE=1 SV=1	1	490483	430182	396905	356080	346898	499532	560352	319865	10566000	12156000	336680	361612	400566	376107	409718	389028	342233	39009000	312879	32034000	580933	7349500	19796000	478808	466503	344674	451250	17935000	35495000	14379000	325998	448316
Q58FA4	Q58FA4	Transcription factor E2F8	E2f8	sp|Q58FA4|E2F8_MOUSE Transcription factor E2F8 OS=Mus musculus OX=10090 GN=E2f8 PE=1 SV=1	1	490483	430182	72861000	356080	346898	499532	560352	319865	360188	350936	336680	361612	400566	376107	409718	389028	342233	747486	312879	746728	580933	385656	323890	478808	466503	344674	451250	415610	620123	56944000	325998	448316
Q5EBG6	Q5EBG6	Heat shock protein beta-6	Hspb6	sp|Q5EBG6|HSPB6_MOUSE Heat shock protein beta-6 OS=Mus musculus OX=10090 GN=Hspb6 PE=1 SV=1	2	490483	430182	396905	356080	346898	499532	560352	319865	360188	350936	336680	361612	3086800	376107	409718	389028	342233	747486	312879	746728	580933	385656	323890	478808	2580600	344674	451250	415610	620123	239670	325998	448316
Q5F2D9	Q5F2D9;Q91YI4;Q91YI4-2	Beta-arrestin-2	Arrb2	tr|Q5F2D9|Q5F2D9_MOUSE Arrestin, beta 2 OS=Mus musculus OX=10090 GN=Arrb2 PE=1 SV=1;sp|Q91YI4|ARRB2_MOUSE Beta-arrestin-2 OS=Mus musculus OX=10090 GN=Arrb2 PE=1 SV=1;sp|Q91YI4-2|ARRB2_MOUSE Isoform 2 of Beta-arrestin-2 OS=Mus musculus OX=10090 GN=Arrb2	1	4194300	3776100	4667300	4232900	5578200	4822100	4345000	3456900	5204500	350936	4855100	4234700	3726300	4179000	5118500	3830800	3603100	747486	4023000	3594800	3496900	3346200	2770000	2885600	2603600	4278700	4171600	5655200	620123	330431	3051100	4144400
Q5F2F2	Q5F2F2	Abhydrolase domain-containing protein 15	Abhd15	sp|Q5F2F2|ABH15_MOUSE Protein ABHD15 OS=Mus musculus OX=10090 GN=Abhd15 PE=1 SV=1	2	490483	430182	396905	356080	346898	499532	119400	319865	360188	350936	336680	361612	400566	376107	409718	389028	342233	344900	100950	324610	580933	385656	323890	478808	466503	344674	451250	415610	129950	330431	325998	448316
Q5SSW2	Q5SSW2;Q5SSW0;F6R7K9	Proteasome activator complex subunit 4	Psme4	sp|Q5SSW2|PSME4_MOUSE Proteasome activator complex subunit 4 OS=Mus musculus OX=10090 GN=Psme4 PE=1 SV=1	4	490483	430182	396905	356080	346898	499532	1693200	319865	360188	350936	336680	361612	400566	376107	409718	389028	342233	6471500	312879	3353300	580933	385656	323890	478808	466503	344674	451250	415610	4673900	330431	325998	448316
Q5SUF2	Q5SUF2;Q5SUF2-3;Q5SUF2-2	Luc7-like protein 3	Luc7l3	sp|Q5SUF2|LC7L3_MOUSE Luc7-like protein 3 OS=Mus musculus OX=10090 GN=Luc7l3 PE=1 SV=1;sp|Q5SUF2-3|LC7L3_MOUSE Isoform 3 of Luc7-like protein 3 OS=Mus musculus OX=10090 GN=Luc7l3;sp|Q5SUF2-2|LC7L3_MOUSE Isoform 2 of Luc7-like protein 3 OS=Mus musculus OX=1	2	1456400	430182	1694500	1876700	2070200	499532	560352	1629300	360188	3091600	336680	1936500	2366500	376107	409718	389028	2804500	2074800	312879	746728	580933	385656	2177300	478808	2220400	344674	3047200	2209000	620123	2283400	1927100	2583100
Q5U4D9	Q5U4D9	THO complex subunit 6 homolog	Thoc6	sp|Q5U4D9|THOC6_MOUSE THO complex subunit 6 homolog OS=Mus musculus OX=10090 GN=Thoc6 PE=1 SV=1	1	490483	430182	396905	356080	346898	499532	560352	4015400	2778400	350936	336680	361612	400566	4394800	4440600	389028	342233	3419200	312879	746728	580933	385656	323890	478808	5320700	344674	451250	415610	620123	330431	325998	448316
Q5U5M8	Q5U5M8	Biogenesis of lysosome-related organelles complex 1 subunit 3	Bloc1s3	sp|Q5U5M8|BL1S3_MOUSE Biogenesis of lysosome-related organelles complex 1 subunit 3 OS=Mus musculus OX=10090 GN=Bloc1s3 PE=1 SV=1	1	490483	430182	396905	356080	346898	499532	6214000	5981400	360188	350936	336680	361612	400566	376107	409718	389028	6528900	747486	312879	746728	580933	385656	323890	478808	6493700	344674	451250	5677300	620123	330431	325998	448316
Q5U5V2	Q5U5V2;Q5U5V2-2	Hydroxylysine kinase	Hykk	sp|Q5U5V2|HYKK_MOUSE Hydroxylysine kinase OS=Mus musculus OX=10090 GN=Hykk PE=1 SV=2;sp|Q5U5V2-2|HYKK_MOUSE Isoform 2 of Hydroxylysine kinase OS=Mus musculus OX=10090 GN=Hykk	6	490483	1010500	1462300	1835700	1358200	499532	4480900	299850	244760	969410	1002400	416220	142420	547610	871940	389028	342233	51058000	146190	23438000	580933	385656	2092300	478808	319640	747030	451250	415610	54489000	1723600	325998	448316
Q60749	Q60749	KH domain-containing, RNA-binding, signal transduction-associated protein 1	Khdrbs1	sp|Q60749|KHDR1_MOUSE KH domain-containing, RNA-binding, signal transduction-associated protein 1 OS=Mus musculus OX=10090 GN=Khdrbs1 PE=1 SV=2	1	13108000	8588400	13773000	356080	9711200	499532	11664000	9993600	10133000	14700000	336680	13868000	7838500	8368500	8336700	6617700	12445000	16438000	7862700	16271000	12088000	11767000	6839000	478808	10110000	7741500	10446000	9161000	28075000	7984300	14408000	8768100
Q60766-2	Q60766-2;Q60766	Immunity-related GTPase family M protein 1	Irgm1	sp|Q60766-2|IRGM1_MOUSE Isoform 2 of Immunity-related GTPase family M protein 1 OS=Mus musculus OX=10090 GN=Irgm1;sp|Q60766|IRGM1_MOUSE Immunity-related GTPase family M protein 1 OS=Mus musculus OX=10090 GN=Irgm1 PE=1 SV=1	6	490483	487640	501240	356080	346898	486150	5135500	319865	360188	1371500	208470	361612	400566	502510	520220	389028	342233	45123000	312879	26859000	580933	615760	2859400	478808	286130	344674	451250	438000	39279000	330431	589360	448316
Q60770	Q60770;Q60770-2;A2AEC9;A0A0G2JEQ3	Syntaxin-binding protein 3	Stxbp3	sp|Q60770|STXB3_MOUSE Syntaxin-binding protein 3 OS=Mus musculus OX=10090 GN=Stxbp3 PE=1 SV=1;sp|Q60770-2|STXB3_MOUSE Isoform 2 of Syntaxin-binding protein 3 OS=Mus musculus OX=10090 GN=Stxbp3	3	490483	430182	777890	356080	346898	499532	560352	319865	360188	1057700	336680	361612	400566	376107	409718	389028	342233	5689200	312879	5775100	580933	385656	323890	478808	466503	1496000	451250	415610	4699900	330431	325998	448316
Q60772	Q60772	Cyclin-dependent kinase 4 inhibitor C	Cdkn2c	sp|Q60772|CDN2C_MOUSE Cyclin-dependent kinase 4 inhibitor C OS=Mus musculus OX=10090 GN=Cdkn2c PE=1 SV=1	1	6713500	6124300	6073300	13371000	10832000	499532	560352	10189000	6588700	10789000	5357600	13389000	13070000	6874100	9593300	389028	342233	747486	312879	746728	580933	4450600	323890	7067300	466503	344674	451250	415610	620123	330431	325998	448316
Q60960	Q60960;G3UXT6;G3UZK5	Importin subunit alpha-5;Importin subunit alpha-5, N-terminally processed	Kpna1	sp|Q60960|IMA5_MOUSE Importin subunit alpha-5 OS=Mus musculus OX=10090 GN=Kpna1 PE=1 SV=2	4	490483	69080000	56425000	68704000	73641000	34535000	560352	319865	51754000	350936	63026000	49926000	59900000	57535000	78343000	72534000	90557000	58856000	74900000	47545000	580933	81871000	102780000	73466000	79286000	64787000	52719000	53844000	85769000	79298000	93507000	448316
Q60991	Q60991	25-hydroxycholesterol 7-alpha-hydroxylase	Cyp7b1	sp|Q60991|CP7B1_MOUSE Cytochrome P450 7B1 OS=Mus musculus OX=10090 GN=Cyp7b1 PE=1 SV=2	9	490483	430182	396905	356080	346898	499532	560352	319865	360188	350936	336680	361612	400566	376107	409718	389028	342233	40341000	312879	31574000	580933	385656	10469000	1349600	38800000	5721800	2707200	7571900	63774000	3398000	1616100	2001200
Q61024	Q61024;D3Z028;D3YYR0;D3Z0C2	Asparagine synthetase [glutamine-hydrolyzing]	Asns	sp|Q61024|ASNS_MOUSE Asparagine synthetase [glutamine-hydrolyzing] OS=Mus musculus OX=10090 GN=Asns PE=1 SV=3	4	490483	430182	396905	356080	346898	499532	560352	319865	360188	350936	336680	361612	400566	376107	409718	389028	342233	747486	312879	746728	580933	385656	323890	478808	2976100	24114000	451250	2827000	620123	330431	325998	448316
Q61102	Q61102	ATP-binding cassette sub-family B member 7, mitochondrial	Abcb7	sp|Q61102|ABCB7_MOUSE ATP-binding cassette sub-family B member 7, mitochondrial OS=Mus musculus OX=10090 GN=Abcb7 PE=1 SV=3	9	490483	1048700	1391700	356080	346898	1365000	3630000	1396300	1090400	347490	1100800	361612	1095100	351010	409718	1234400	342233	29592000	1386300	23663000	580933	1725100	2281300	478808	211120	2219300	1620800	1400300	23803000	2019100	2374200	448316
Q61187	Q61187;A0A1B0GRX2;A0A1B0GS10;A0A1B0GS09	Tumor susceptibility gene 101 protein	Tsg101	sp|Q61187|TS101_MOUSE Tumor susceptibility gene 101 protein OS=Mus musculus OX=10090 GN=Tsg101 PE=1 SV=2;tr|A0A1B0GRX2|A0A1B0GRX2_MOUSE Tumor susceptibility gene 101 protein OS=Mus musculus OX=10090 GN=Tsg101 PE=1 SV=1;tr|A0A1B0GS10|A0A1B0GS10_MOUSE Tumor	2	3858200	7183900	3907000	356080	6163000	4445600	4564300	319865	360188	4192700	6923300	5293700	4643700	3685800	4430400	5374600	6379500	6798800	6699500	5164400	580933	6715200	6990000	5535300	7013400	5187200	5213900	4381100	5638100	330431	2982000	2905000
Q61247	Q61247;E9PXE0;Q5ND35	Alpha-2-antiplasmin	Serpinf2	sp|Q61247|A2AP_MOUSE Alpha-2-antiplasmin OS=Mus musculus OX=10090 GN=Serpinf2 PE=1 SV=1;tr|E9PXE0|E9PXE0_MOUSE Alpha-2-antiplasmin OS=Mus musculus OX=10090 GN=Serpinf2 PE=4 SV=1;tr|Q5ND35|Q5ND35_MOUSE Alpha-2-antiplasmin (Fragment) OS=Mus musculus OX=10090	2	6423900	6999500	7840800	10011000	9282800	8588800	7369000	319865	360188	9453700	5222000	7906800	5803200	376107	409718	9450000	342233	13186000	8636400	12831000	580933	385656	10711000	478808	8025400	344674	451250	415610	18105000	10336000	325998	448316
Q61268	Q61268	Apolipoprotein C-IV	Apoc4	sp|Q61268|APOC4_MOUSE Apolipoprotein C-IV OS=Mus musculus OX=10090 GN=Apoc4 PE=1 SV=1	1	20361000	31184000	25885000	27695000	18943000	19706000	21838000	30697000	29539000	29292000	17855000	29496000	35762000	25986000	30440000	26208000	31100000	29639000	34519000	20908000	31550000	31487000	44137000	34280000	21806000	26661000	26626000	24103000	28465000	31065000	28992000	31555000
Q61391	Q61391	Neprilysin	Mme	sp|Q61391|NEP_MOUSE Neprilysin OS=Mus musculus OX=10090 GN=Mme PE=1 SV=3	1	4175700	4990400	5270700	5578800	346898	3298800	560352	319865	5203400	7249900	5800200	7086300	4117200	4541200	3409700	389028	7133500	9579100	15760000	9752500	580933	385656	323890	478808	466503	2589300	5359500	4896900	8366000	330431	5054700	448316
Q61469	Q61469;Q61469-2	Lipid phosphate phosphohydrolase 1	Ppap2a	sp|Q61469|PLPP1_MOUSE Phospholipid phosphatase 1 OS=Mus musculus OX=10090 GN=Plpp1 PE=1 SV=1;sp|Q61469-2|PLPP1_MOUSE Isoform 2 of Phospholipid phosphatase 1 OS=Mus musculus OX=10090 GN=Plpp1	1	695680	1681900	2478300	1553000	2070900	1379500	2313300	1323600	1400400	1267200	2616800	2390600	1841900	1590900	1614900	1125000	2480600	1420100	1314700	1560500	1272900	2724600	1617800	2338500	1603400	344674	2306400	2203800	824180	1687100	2326200	2991200
Q61586	Q61586;A0A494BA32;A0A494BAR5	Glycerol-3-phosphate acyltransferase 1, mitochondrial	Gpam	sp|Q61586|GPAT1_MOUSE Glycerol-3-phosphate acyltransferase 1, mitochondrial OS=Mus musculus OX=10090 GN=Gpam PE=1 SV=2;tr|A0A494BA32|A0A494BA32_MOUSE Glycerol-3-phosphate acyltransferase 1, mitochondrial OS=Mus musculus OX=10090 GN=Gpam PE=1 SV=1	9	490483	430182	396905	356080	346898	499532	2004800	319865	360188	350936	336680	361612	400566	376107	409718	389028	342233	66025000	312879	35254000	580933	1528100	1928600	478808	466503	344674	451250	415610	11092000	330431	1829800	448316
Q61595	Q61595;A0A087WQD0;A0A087WNW3;A0A087WS23;A0A087WQQ5;A0A087WPW5;A0A087WQI3;A0A087WP85;A0A087WPX0;Q61595-8;A0A087WQ25;A0A087WQG4;A0A087WP14;A0A087WS29;A0A087WS04;A0A087WP48;A0A087WRS1;F8VQC7;Q61595-10;Q61595-4;Q61595-11;Q61595-15;Q61595-7;Q61595-9;Q61595-5;Q61595-13;A0A087WQF8;Q61595-2;Q61595-6;Q61595-14;Q61595-3;Q61595-16;Q61595-12;A0A087WPY8;A0A087WR91	Kinectin	Ktn1	sp|Q61595|KTN1_MOUSE Kinectin OS=Mus musculus OX=10090 GN=Ktn1 PE=1 SV=1;tr|A0A087WQD0|A0A087WQD0_MOUSE Kinectin OS=Mus musculus OX=10090 GN=Ktn1 PE=1 SV=1;tr|A0A087WNW3|A0A087WNW3_MOUSE Kinectin OS=Mus musculus OX=10090 GN=Ktn1 PE=1 SV=1;tr|A0A087WS23|A0A	3	490483	430182	396905	356080	346898	499532	5393600	319865	360188	350936	336680	4795600	400566	6364600	6333000	389028	342233	7072000	312879	10024000	580933	385656	6084900	478808	8244800	344674	451250	6120800	10165000	4916200	5095800	7542500
Q61694	Q61694;A0A087WPY5	3 beta-hydroxysteroid dehydrogenase type 5	Hsd3b5	sp|Q61694|3BHS5_MOUSE NADPH-dependent 3-keto-steroid reductase Hsd3b5 OS=Mus musculus OX=10090 GN=Hsd3b5 PE=1 SV=4	12	490483	2985100	396905	356080	1963900	499532	560352	4176100	360188	2103200	336680	361612	400566	376107	409718	389028	3315100	34075000	312879	30954000	30566000	11553000	41890000	13061000	46425000	19171000	20026000	38883000	194160000	32208000	20710000	19698000
Q61830	Q61830	Macrophage mannose receptor 1	Mrc1	sp|Q61830|MRC1_MOUSE Macrophage mannose receptor 1 OS=Mus musculus OX=10090 GN=Mrc1 PE=1 SV=2	10	202020000	225520000	171640000	91521000	103760000	157860000	197560000	232850000	101990000	227360000	196750000	36234000	88697000	99498000	409718	21665000	154140000	890210000	181270000	658460000	580933	164110000	54796000	111460000	173510000	344674	106660000	170650000	654670000	181390000	155500000	181070000
Q61941	Q61941;Q8C9V5;Q8BGK0;E9Q8F4	NAD(P) transhydrogenase, mitochondrial	Nnt	sp|Q61941|NNTM_MOUSE NAD(P) transhydrogenase, mitochondrial OS=Mus musculus OX=10090 GN=Nnt PE=1 SV=2;tr|Q8C9V5|Q8C9V5_MOUSE Proton-translocating NAD(P)(+) transhydrogenase OS=Mus musculus OX=10090 GN=Nnt PE=1 SV=1;tr|Q8BGK0|Q8BGK0_MOUSE Proton-translocati	20	490483	54610	858840	919760	573630	345680	3507300	218860	82623	844820	336680	361300	200670	72820	73198	185960	342233	151680000	54459	117820000	580933	982470	73459	333850	72326	241360	451250	415610	55939000	883570	256750	74182
Q62000	Q62000	Mimecan	Ogn	sp|Q62000|MIME_MOUSE Mimecan OS=Mus musculus OX=10090 GN=Ogn PE=1 SV=1	1	1019500	719460	1210500	2203500	1954500	1837800	668690	4406000	773000	350936	336680	1345100	1501600	1105100	1112100	1648500	2152300	747486	1583300	746728	580933	1935200	323890	1247400	3035700	2338700	1412400	415610	620123	330431	325998	448316
Q62318	Q62318	Transcription intermediary factor 1-beta	Trim28	sp|Q62318|TIF1B_MOUSE Transcription intermediary factor 1-beta OS=Mus musculus OX=10090 GN=Trim28 PE=1 SV=3	2	4180200	430182	6540900	356080	5184800	499532	560352	319865	360188	350936	336680	361612	400566	376107	409718	389028	342233	13747000	312879	12272000	580933	385656	323890	478808	466503	5270600	451250	415610	13201000	330431	325998	448316
Q62470-3	Q62470-3;Q62470;Q62470-2	Integrin alpha-3;Integrin alpha-3 heavy chain;Integrin alpha-3 light chain	Itga3	sp|Q62470-3|ITA3_MOUSE Isoform 3 of Integrin alpha-3 OS=Mus musculus OX=10090 GN=Itga3;sp|Q62470|ITA3_MOUSE Integrin alpha-3 OS=Mus musculus OX=10090 GN=Itga3 PE=1 SV=1;sp|Q62470-2|ITA3_MOUSE Isoform 2 of Integrin alpha-3 OS=Mus musculus OX=10090 GN=Itga3	2	3399600	5516500	4907600	3825500	4887800	6124400	560352	4837000	4558900	4204700	4561000	6061500	5179600	4207200	3736400	5113300	6392400	747486	8672800	746728	5901800	4377500	323890	5115200	5643600	6204400	7779200	5424000	3393700	330431	6350800	448316
Q63739	Q63739	Protein tyrosine phosphatase type IVA 1	Ptp4a1	sp|Q63739|TP4A1_MOUSE Protein tyrosine phosphatase type IVA 1 OS=Mus musculus OX=10090 GN=Ptp4a1 PE=1 SV=1	1	3491100	3990100	2626400	3885200	4460200	4838500	4159800	3402900	3418700	4298400	5380900	4993500	6145700	3598100	4227200	6236800	3875400	3035000	3743700	2554400	6781200	3800000	4355700	3013700	2872500	6094400	5082100	4031000	3617600	4303500	3427300	4030500
Q63810-2	Q63810-2;Q63810	Calcineurin subunit B type 1	Ppp3r1	sp|Q63810-2|CANB1_MOUSE Isoform 2 of Calcineurin subunit B type 1 OS=Mus musculus OX=10090 GN=Ppp3r1;sp|Q63810|CANB1_MOUSE Calcineurin subunit B type 1 OS=Mus musculus OX=10090 GN=Ppp3r1 PE=1 SV=3	3	10348000	7261300	5783900	4302800	9250800	499532	5484300	4243100	7483800	5212400	7130800	5568700	4324700	376107	7538300	7397300	5412300	3428600	5978200	4611700	580933	4646800	323890	6328700	6171100	344674	4967300	6904600	620123	330431	325998	4347000
Q63918	Q63918	Serum deprivation-response protein	Sdpr	sp|Q63918|CAVN2_MOUSE Caveolae-associated protein 2 OS=Mus musculus OX=10090 GN=Cavin2 PE=1 SV=3	1	6220900	11320000	13396000	11338000	14706000	16800000	10149000	16435000	10341000	13752000	11176000	14722000	16750000	13226000	10556000	11831000	8729300	10163000	9284800	8735600	11468000	12947000	16354000	7615200	15379000	14951000	11602000	14407000	11631000	18628000	12457000	11567000
Q64105	Q64105	Sepiapterin reductase	Spr	sp|Q64105|SPRE_MOUSE Sepiapterin reductase OS=Mus musculus OX=10090 GN=Spr PE=1 SV=1	1	10290000	430182	396905	356080	346898	8135800	560352	319865	5664100	350936	336680	361612	7475800	376107	409718	389028	342233	747486	312879	746728	580933	385656	323890	478808	466503	344674	451250	415610	620123	330431	325998	448316
Q64310	Q64310;E0CXD9;F7CH13	Surfeit locus protein 4	Surf4	sp|Q64310|SURF4_MOUSE Surfeit locus protein 4 OS=Mus musculus OX=10090 GN=Surf4 PE=1 SV=1;tr|E0CXD9|E0CXD9_MOUSE Surfeit locus protein 4 OS=Mus musculus OX=10090 GN=Surf4 PE=1 SV=1	4	490483	803000	2698200	2074100	2095100	499532	19197000	917780	374350	1896400	2990200	392450	2132400	1916400	2433400	1592100	342233	129850000	312879	98267000	580933	1584800	7299900	478808	3464500	344674	451250	414500	94614000	3537400	7221600	785960
Q64462	Q64462;A0A0A6YY50;F6X6A4	Cytochrome P450 4B1	Cyp4b1	sp|Q64462|CP4B1_MOUSE Cytochrome P450 4B1 OS=Mus musculus OX=10090 GN=Cyp4b1 PE=1 SV=1;tr|A0A0A6YY50|A0A0A6YY50_MOUSE Cytochrome P450 4B1 (Fragment) OS=Mus musculus OX=10090 GN=Cyp4b1 PE=1 SV=1;tr|F6X6A4|F6X6A4_MOUSE Cytochrome P450 4B1 (Fragment) OS=Mus m	4	490483	430182	396905	2071400	346898	499532	4286500	319865	1493800	350936	336680	361612	400566	376107	2331800	389028	342233	14573000	312879	18008000	580933	385656	3609900	478808	1874300	344674	451250	415610	14699000	1977800	325998	448316
Q64464	Q64464	Cytochrome P450 3A13	Cyp3a13	sp|Q64464|CP3AD_MOUSE Cytochrome P450 3A13 OS=Mus musculus OX=10090 GN=Cyp3a13 PE=1 SV=1	13	400160	634860	1574400	2666600	3860600	499532	18350000	1668800	2731700	3615100	864630	835790	3582600	1299400	2315100	1144000	2252900	115860000	1178300	143100000	2725700	4185200	6350000	478808	8796900	1683500	451250	821800	79205000	3162400	1245900	702760
Q64514-2	Q64514-2;Q64514;A0A087WRC0;Q05DJ9;A0A087WP19;A0A087WQR6	Tripeptidyl-peptidase 2	Tpp2	sp|Q64514-2|TPP2_MOUSE Isoform Short of Tripeptidyl-peptidase 2 OS=Mus musculus OX=10090 GN=Tpp2;sp|Q64514|TPP2_MOUSE Tripeptidyl-peptidase 2 OS=Mus musculus OX=10090 GN=Tpp2 PE=1 SV=3;tr|A0A087WRC0|A0A087WRC0_MOUSE Tripeptidyl-peptidase 2 OS=Mus musculus	17	4475300	3170300	6537300	7770600	9318900	499532	14242000	25452000	9723100	9210200	2516400	2833300	10433000	3221900	4956900	4954400	4025700	245500000	10385000	137370000	580933	9462700	6634700	5224300	31302000	12372000	4113200	4257600	159040000	25600000	23889000	8943900
Q66GT5	Q66GT5;A0A5F8MPX4	Phosphatidylglycerophosphatase and protein-tyrosine phosphatase 1	Ptpmt1	sp|Q66GT5|PTPM1_MOUSE Phosphatidylglycerophosphatase and protein-tyrosine phosphatase 1 OS=Mus musculus OX=10090 GN=Ptpmt1 PE=1 SV=1;tr|A0A5F8MPX4|A0A5F8MPX4_MOUSE Phosphatidylglycerophosphatase and protein-tyrosine phosphatase 1 OS=Mus musculus OX=10090 G	3	490483	430182	396905	356080	2850700	499532	560352	319865	360188	350936	336680	361612	400566	376107	409718	389028	342233	15769000	312879	10774000	580933	2951800	323890	478808	466503	344674	451250	415610	15216000	330431	325998	448316
Q68EF8	Q68EF8	Rap guanine nucleotide exchange factor-like 1	Rapgefl1	sp|Q68EF8|RPGFL_MOUSE Rap guanine nucleotide exchange factor-like 1 OS=Mus musculus OX=10090 GN=Rapgefl1 PE=1 SV=2	1	76049000	67851000	38214000	46439000	40694000	34359000	44477000	48357000	47668000	51508000	55610000	32136000	54875000	54805000	39702000	35947000	29740000	14936000	43127000	15837000	25294000	49647000	36285000	81003000	32450000	29738000	62217000	55257000	21955000	28713000	23999000	48664000
Q68FG2	Q68FG2;A0A5F8MPM8;A0A494BBH5	Spectrin beta chain	Sptbn2	tr|Q68FG2|Q68FG2_MOUSE Spectrin beta chain OS=Mus musculus OX=10090 GN=Sptbn2 PE=1 SV=1	14	44865	430182	396905	356080	346898	499532	509220	319865	360188	75379	336680	64494	117670	107990	409718	389028	43859	18545000	63368	20570000	580933	23701	225440	478808	28044	25316	244830	18071	15196000	21699	296490	448316
Q6A068	Q6A068;A0A1W2P7S8	Cell division cycle 5-like protein	Cdc5l	sp|Q6A068|CDC5L_MOUSE Cell division cycle 5-like protein OS=Mus musculus OX=10090 GN=Cdc5l PE=1 SV=2;tr|A0A1W2P7S8|A0A1W2P7S8_MOUSE Predicted gene, 32717 OS=Mus musculus OX=10090 GN=Gm32717 PE=3 SV=1	2	490483	3308100	396905	356080	7283100	5339100	560352	319865	2648100	6294500	336680	361612	6828700	3696100	5239200	389028	342233	4636900	312879	8950700	580933	3319600	6596000	478808	5542900	7498900	451250	415610	8046700	10269000	5233700	448316
Q6A0A9	Q6A0A9	Constitutive coactivator of PPAR-gamma-like protein 1	FAM120A	sp|Q6A0A9|F120A_MOUSE Constitutive coactivator of PPAR-gamma-like protein 1 OS=Mus musculus OX=10090 GN=FAM120A PE=1 SV=2	7	490483	3177800	2996700	356080	2996100	499532	2490500	319865	360188	350936	336680	361612	400566	376107	409718	389028	3325000	11570000	2401400	7574800	580933	3507900	2170600	478808	466503	344674	451250	415610	4906700	330431	325998	448316
Q6NXL1	Q6NXL1	Sec24 related gene family, member D (S. cerevisiae)	Sec24d	tr|Q6NXL1|Q6NXL1_MOUSE Sec24-related gene family, member D (S. cerevisiae) OS=Mus musculus OX=10090 GN=Sec24d PE=1 SV=1	6	490483	430182	396905	1570400	346898	1205300	7573200	319865	360188	4538900	336680	1760200	400566	376107	1158600	389028	342233	82928000	312879	49807000	580933	385656	393200	255220	4445200	3666100	451250	346020	27029000	4100000	2199200	3564100
Q6NZM8	Q6NZM8;Q60967;A0A0G2JFM1;A0A0G2JFK8	Bifunctional 3-phosphoadenosine 5-phosphosulfate synthase 1;Sulfate adenylyltransferase;Adenylyl-sulfate kinase	Papss1	tr|Q6NZM8|Q6NZM8_MOUSE 3-phosphoadenosine-5-phosphosulfate synthase OS=Mus musculus OX=10090 GN=Papss1 PE=1 SV=1;sp|Q60967|PAPS1_MOUSE Bifunctional 3-phosphoadenosine 5-phosphosulfate synthase 1 OS=Mus musculus OX=10090 GN=Papss1 PE=1 SV=1;tr|A0A0G2JFM	1	326330	227510	274320	177920	146700	250260	228390	191840	224240	224610	218890	163880	400566	281950	167500	177090	150600	251500	151310	224660	580933	185830	179770	205920	250460	183580	194790	165940	122760	201040	189850	322590
Q6NZR5	Q6NZR5;G3UYT1	Superkiller viralicidic activity 2-like (S. cerevisiae)	Skiv2l	tr|Q6NZR5|Q6NZR5_MOUSE Superkiller viralicidic activity 2-like (S. cerevisiae) OS=Mus musculus OX=10090 GN=Skiv2l PE=1 SV=1;tr|G3UYT1|G3UYT1_MOUSE Superkiller viralicidic activity 2-like (S. cerevisiae) (Fragment) OS=Mus musculus OX=10090 GN=Skiv2l PE=1 SV	2	490483	2606600	396905	356080	346898	499532	560352	1786300	360188	350936	1428400	361612	400566	1510500	409718	389028	342233	3325500	2926600	6482900	580933	3025300	3142300	1718000	466503	344674	2162800	415610	5805800	330431	325998	448316
Q6P1C6	Q6P1C6	Leucine-rich repeats and immunoglobulin-like domains protein 3	Lrig3	sp|Q6P1C6|LRIG3_MOUSE Leucine-rich repeats and immunoglobulin-like domains protein 3 OS=Mus musculus OX=10090 GN=Lrig3 PE=1 SV=1	1	490483	430182	396905	356080	346898	499532	560352	319865	360188	350936	336680	361612	400566	376107	409718	389028	342233	747486	312879	746728	580933	385656	323890	478808	466503	344674	451250	415610	620123	330431	325998	448316
Q6P542	Q6P542	ATP-binding cassette sub-family F member 1	Abcf1	sp|Q6P542|ABCF1_MOUSE ATP-binding cassette sub-family F member 1 OS=Mus musculus OX=10090 GN=Abcf1 PE=1 SV=1	4	6521800	8336100	4760800	6474200	346898	499532	5816100	319865	360188	3359700	6712700	361612	400566	376107	409718	389028	5458300	12485000	312879	10729000	580933	385656	4165200	478808	4440000	344674	451250	415610	10168000	330431	325998	448316
Q6P5F9	Q6P5F9;A2AKT6;F6YA11	Exportin-1	Xpo1	sp|Q6P5F9|XPO1_MOUSE Exportin-1 OS=Mus musculus OX=10090 GN=Xpo1 PE=1 SV=1	7	490483	430182	396905	356080	346898	499532	596280	319865	360188	350936	336680	361612	400566	376107	409718	389028	342233	3583200	312879	13929000	580933	385656	415310	478808	500460	344674	451250	415610	20509000	330431	405080	448316
Q6P6J9	Q6P6J9	Thioredoxin domain-containing protein 15	Txndc15	sp|Q6P6J9|TXD15_MOUSE Thioredoxin domain-containing protein 15 OS=Mus musculus OX=10090 GN=Txndc15 PE=1 SV=1	2	627050	809340	1678700	954530	1179900	964610	1126000	1048000	541650	1370300	1693300	899790	1187700	1149800	939240	389028	805340	1489300	949550	1477500	580933	1033900	1283400	1004900	1321400	785130	1359200	1113900	685520	1173300	538230	1649800
Q6P6L5	Q6P6L5;D3YU50;A0A571BEN1;F6RQD1	Myosin binding protein C, slow-type	Mybpc1	tr|Q6P6L5|Q6P6L5_MOUSE Myosin-binding protein C, slow-type OS=Mus musculus OX=10090 GN=Mybpc1 PE=1 SV=1;tr|D3YU50|D3YU50_MOUSE Myosin-binding protein C, slow-type OS=Mus musculus OX=10090 GN=Mybpc1 PE=1 SV=1;tr|A0A571BEN1|A0A571BEN1_MOUSE Myosin-binding pr	3	490483	430182	396905	356080	346898	499532	1746400	319865	360188	350936	336680	361612	4142400	376107	409718	389028	342233	747486	312879	746728	580933	385656	323890	478808	8076800	344674	451250	415610	620123	330431	325998	448316
Q6P8J7	Q6P8J7	Creatine kinase S-type, mitochondrial	Ckmt2	sp|Q6P8J7|KCRS_MOUSE Creatine kinase S-type, mitochondrial OS=Mus musculus OX=10090 GN=Ckmt2 PE=1 SV=1	12	490483	430182	396905	356080	80250000	29269000	560352	15911000	360188	978340	336680	361612	138860000	1573200	409718	389028	342233	747486	312879	746728	580933	385656	323890	478808	151950000	344674	451250	415610	620123	330431	325998	448316
Q6P8U6	Q6P8U6;A0A494B914	Pancreatic triacylglycerol lipase	Pnlip	sp|Q6P8U6|LIPP_MOUSE Pancreatic triacylglycerol lipase OS=Mus musculus OX=10090 GN=Pnlip PE=1 SV=1	7	51418000	430182	396905	356080	346898	25347000	560352	13046000	13304000	12049000	336680	361612	15319000	21554000	409718	389028	342233	747486	312879	746728	580933	385656	323890	478808	466503	3814000	451250	415610	620123	330431	325998	448316
Q6PCM4	Q6PCM4	Zinc finger protein 157	Zfp157	tr|Q6PCM4|Q6PCM4_MOUSE Zinc finger protein 157 OS=Mus musculus OX=10090 GN=Zfp157 PE=2 SV=1	1	350540000	430182	396905	1672800	346898	499532	4474700	4410000	360188	350936	336680	361612	332240000	292040000	2172900	389028	1121500	16332000	312879	746728	580933	1612500	323890	257460000	466503	2307600	451250	1617100	620123	330431	325998	448316
Q6PDE7-2	Q6PDE7-2;Q6PDE7	Gamma-glutamyltransferase 6;Gamma-glutamyltransferase 6 heavy chain;Gamma-glutamyltransferase 6 light chain	Ggt6	sp|Q6PDE7-2|GGT6_MOUSE Isoform 2 of Glutathione hydrolase 6 OS=Mus musculus OX=10090 GN=Ggt6;sp|Q6PDE7|GGT6_MOUSE Glutathione hydrolase 6 OS=Mus musculus OX=10090 GN=Ggt6 PE=2 SV=1	1	2963100	4041700	3073700	4090300	2946100	3380500	2741500	4373600	3863900	2622700	2487900	3433800	3965000	3635500	4259300	4754500	2601900	747486	3569600	746728	580933	2092000	3058900	2837300	3120000	4590700	451250	415610	1855900	330431	325998	2261100
Q6PDI5-2	Q6PDI5-2;Q6PDI5;A2ALV7;A2ALV6;A2ALV8;A2ALW1;A2ALV9	Proteasome-associated protein ECM29 homolog	Ecm29;AI314180	sp|Q6PDI5-2|ECM29_MOUSE Isoform 2 of Proteasome adapter and scaffold protein ECM29 OS=Mus musculus OX=10090 GN=Ecpas;sp|Q6PDI5|ECM29_MOUSE Proteasome adapter and scaffold protein ECM29 OS=Mus musculus OX=10090 GN=Ecpas PE=1 SV=3;tr|A2ALV7|A2ALV7_MOUSE Prot	10	490483	430182	396905	356080	346898	499532	1024600	319865	360188	350936	336680	361612	400566	376107	409718	389028	342233	7610300	312879	8486600	580933	385656	323890	478808	466503	344674	451250	415610	8183400	330431	325998	448316
Q6PDY2	Q6PDY2	2-aminoethanethiol dioxygenase	Ado	sp|Q6PDY2|AEDO_MOUSE 2-aminoethanethiol dioxygenase OS=Mus musculus OX=10090 GN=Ado PE=1 SV=2	2	10665000	11064000	11182000	7134400	10767000	11487000	560352	11723000	9620900	7531300	12097000	9069600	6980800	8728200	9450300	9703500	13422000	5607200	10710000	7145800	580933	5181300	7162200	11258000	9514700	9037800	13490000	8428400	5957600	5585800	9210100	11096000
Q6PE15	Q6PE15;Q6PE15-2	Mycophenolic acid acyl-glucuronide esterase, mitochondrial	Abhd10	sp|Q6PE15|ABHDA_MOUSE Mycophenolic acid acyl-glucuronide esterase, mitochondrial OS=Mus musculus OX=10090 GN=Abhd10 PE=1 SV=1;sp|Q6PE15-2|ABHDA_MOUSE Isoform 2 of Mycophenolic acid acyl-glucuronide esterase, mitochondrial OS=Mus musculus OX=10090 GN=Abhd10	2	2430100	1994900	396905	356080	346898	2280400	560352	1600800	360188	350936	2433800	361612	400566	376107	409718	4407800	342233	747486	312879	746728	580933	385656	323890	3400800	3112000	344674	4544400	4004800	620123	2823200	325998	448316
Q6PGH2	Q6PGH2	Hematological and neurological expressed 1-like protein	Hn1l	sp|Q6PGH2|JUPI2_MOUSE Jupiter microtubule associated homolog 2 OS=Mus musculus OX=10090 GN=Jpt2 PE=1 SV=1	3	13624000	8285400	15240000	11294000	10597000	499532	560352	9939700	10759000	10656000	15998000	11934000	8545200	11528000	15055000	15053000	11412000	7337900	9334300	746728	15527000	9930400	9383700	12533000	12144000	11761000	451250	15659000	620123	7058700	9826000	14730000
Q6TCG2	Q6TCG2	Progestin and adipoQ receptor family member 9	Paqr9	sp|Q6TCG2|PAQR9_MOUSE Membrane progesterone receptor epsilon OS=Mus musculus OX=10090 GN=Paqr9 PE=1 SV=2	2	490483	1145700	396905	356080	1028000	499532	1524800	319865	360188	1181600	336680	361612	400566	376107	409718	389028	342233	9238500	523960	9911300	580933	385656	323890	478808	466503	344674	451250	415610	10197000	908870	325998	448316
Q6XPS7	Q6XPS7	L-threonine aldolase	Tha1	tr|Q6XPS7|Q6XPS7_MOUSE L-threonine aldolase OS=Mus musculus OX=10090 GN=Tha1 PE=1 SV=1	1	490483	492970	396905	1647500	346898	635000	560352	319865	360188	350936	1298100	361612	1362400	1014700	1506600	389028	342233	3290000	312879	3620500	580933	385656	2627400	478808	1680500	2280200	1641200	2188100	3230200	2621600	2269100	448316
Q6ZQ38	Q6ZQ38;D3YWC5	Cullin-associated NEDD8-dissociated protein 1	Cand1	sp|Q6ZQ38|CAND1_MOUSE Cullin-associated NEDD8-dissociated protein 1 OS=Mus musculus OX=10090 GN=Cand1 PE=1 SV=2	18	117790	703500	329590	993450	346898	499532	4633500	1017500	265750	494250	165020	361612	708670	254840	3988500	289960	342233	70684000	4165600	75509000	470210	1606600	2509500	638390	2434800	933890	56182	976420	103020000	1887900	1974700	1035100
Q6ZWQ7	Q6ZWQ7	Signal peptidase complex subunit 3	Spcs3	sp|Q6ZWQ7|SPCS3_MOUSE Signal peptidase complex subunit 3 OS=Mus musculus OX=10090 GN=Spcs3 PE=1 SV=1	1	6518800	7024600	12989000	15365000	14855000	9191700	14760000	6745800	9437700	14013000	336680	12019000	9892600	8340300	16280000	6132800	15743000	19787000	8523500	20962000	580933	16083000	14816000	15641000	12437000	12191000	10064000	11787000	15058000	18506000	11430000	15482000
Q6ZWY3	Q6ZWY3;D6RH49;D3YYB0	40S ribosomal protein S27-like;40S ribosomal protein S27	Rps27l	sp|Q6ZWY3|RS27L_MOUSE 40S ribosomal protein S27-like OS=Mus musculus OX=10090 GN=Rps27l PE=1 SV=3;tr|D6RH49|D6RH49_MOUSE 40S ribosomal protein S27 OS=Mus musculus OX=10090 GN=Rps27l PE=1 SV=1;tr|D3YYB0|D3YYB0_MOUSE 40S ribosomal protein S27 OS=Mus musculus	1	77640000	71137000	73790000	76246000	77439000	100710000	86451000	92271000	75726000	83452000	72614000	72356000	78239000	94032000	77318000	83410000	106990000	97546000	89233000	92804000	94318000	88745000	84305000	104260000	105940000	85637000	89067000	107460000	94447000	59994000	106210000	96141000
Q71FD5	Q71FD5	E3 ubiquitin-protein ligase ZNRF2	Znrf2	sp|Q71FD5|ZNRF2_MOUSE E3 ubiquitin-protein ligase ZNRF2 OS=Mus musculus OX=10090 GN=Znrf2 PE=1 SV=1	1	490483	5723100	11037000	11560000	346898	499532	7164900	7377100	360188	350936	7146000	11109000	8771900	6874000	6074300	15366000	8541200	747486	10792000	746728	12964000	8786100	323890	478808	466503	7729300	8099100	415610	8103100	12805000	8673700	10140000
Q76LS9-2	Q76LS9-2;Q76LS9	Protein FAM63A	Fam63a	sp|Q76LS9-2|MINY1_MOUSE Isoform 2 of Ubiquitin carboxyl-terminal hydrolase MINDY-1 OS=Mus musculus OX=10090 GN=Mindy1;sp|Q76LS9|MINY1_MOUSE Ubiquitin carboxyl-terminal hydrolase MINDY-1 OS=Mus musculus OX=10090 GN=Mindy1 PE=1 SV=1	1	490483	4740800	3414600	356080	346898	499532	4009100	319865	2897400	4018900	336680	3893400	400566	5316500	4300900	389028	342233	2841400	3194700	5195600	580933	4317900	4917800	478808	3847000	344674	4551200	4902800	3641500	2764300	325998	448316
Q78IK4	Q78IK4;B1AV14	MICOS complex subunit Mic27	Apool	sp|Q78IK4|MIC27_MOUSE MICOS complex subunit Mic27 OS=Mus musculus OX=10090 GN=Apool PE=1 SV=1;tr|B1AV14|B1AV14_MOUSE MICOS complex subunit OS=Mus musculus OX=10090 GN=Apool PE=1 SV=1	7	490483	2809600	5223300	3663600	3037600	2226600	15579000	4494000	3527300	8301500	5142500	3844900	400566	2258100	863530	389028	3705000	72596000	5036000	63190000	580933	5882400	5764200	3348000	4283100	4326800	3776100	415610	42988000	5002400	12060000	6386600
Q78T54-2	Q78T54-2;Q78T54	Vacuolar ATPase assembly integral membrane protein Vma21	Vma21	sp|Q78T54-2|VMA21_MOUSE Isoform 2 of Vacuolar ATPase assembly integral membrane protein Vma21 OS=Mus musculus OX=10090 GN=Vma21;sp|Q78T54|VMA21_MOUSE Vacuolar ATPase assembly integral membrane protein Vma21 OS=Mus musculus OX=10090 GN=Vma21 PE=1 SV=1	1	9085900	10994000	7238800	356080	11975000	9355500	9677600	8907200	7953100	350936	336680	9181400	8556400	10990000	6644500	6582500	12239000	9640500	11103000	12815000	580933	8349600	8501300	10492000	8406100	8253000	6869400	6525700	13292000	7910900	8427900	7741300
Q78YZ6-3	Q78YZ6-3;Q78YZ6-2;Q78YZ6	Short coiled-coil protein	Scoc	sp|Q78YZ6-3|SCOC_MOUSE Isoform 3 of Short coiled-coil protein OS=Mus musculus OX=10090 GN=Scoc;sp|Q78YZ6-2|SCOC_MOUSE Isoform 2 of Short coiled-coil protein OS=Mus musculus OX=10090 GN=Scoc;sp|Q78YZ6|SCOC_MOUSE Short coiled-coil protein OS=Mus musculus OX=	1	13963000	14602000	22470000	12515000	15402000	12511000	560352	15457000	17266000	19557000	18784000	15247000	13054000	16730000	15071000	23106000	13941000	747486	14847000	746728	13451000	16188000	12646000	16037000	466503	344674	13271000	18087000	620123	12309000	18723000	13901000
Q7TMC8-2	Q7TMC8-2;Q7TMC8	L-fucose kinase	Fuk	sp|Q7TMC8-2|FCSK_MOUSE Isoform 2 of L-fucose kinase OS=Mus musculus OX=10090 GN=Fcsk;sp|Q7TMC8|FCSK_MOUSE L-fucose kinase OS=Mus musculus OX=10090 GN=Fcsk PE=1 SV=1	1	490483	430182	396905	356080	346898	499532	560352	319865	360188	350936	336680	361612	400566	376107	409718	389028	342233	747486	312879	746728	580933	385656	323890	478808	466503	344674	451250	415610	620123	330431	325998	448316
Q7TNE1	Q7TNE1	Succinate--hydroxymethylglutarate CoA-transferase	Sugct	sp|Q7TNE1|SUCHY_MOUSE Succinate--hydroxymethylglutarate CoA-transferase OS=Mus musculus OX=10090 GN=Sugct PE=1 SV=2	2	490483	430182	3464500	4204800	346898	3605000	8087400	3904800	360188	2999300	336680	361612	400566	2960700	409718	389028	342233	27572000	312879	18999000	580933	3272900	4945700	1596800	4196400	344674	451250	415610	24243000	8211800	5688100	448316
Q7TPV4	Q7TPV4	Myb-binding protein 1A	Mybbp1a	sp|Q7TPV4|MBB1A_MOUSE Myb-binding protein 1A OS=Mus musculus OX=10090 GN=Mybbp1a PE=1 SV=2	5	490483	430182	82797000	123020000	346898	80443000	560352	114760000	99932000	123130000	336680	361612	94892000	376107	132580000	389028	45428000	116020000	84246000	108940000	580933	59352000	276030000	32041000	57264000	79589000	86709000	46055000	124360000	92480000	84359000	83511000
Q7TPZ8	Q7TPZ8	Carboxypeptidase A1	Cpa1	sp|Q7TPZ8|CBPA1_MOUSE Carboxypeptidase A1 OS=Mus musculus OX=10090 GN=Cpa1 PE=1 SV=1	8	63995000	430182	396905	2531600	346898	10290000	560352	4441700	360188	6223500	336680	361612	3849900	7311400	409718	389028	342233	747486	312879	746728	580933	385656	323890	478808	466503	344674	451250	415610	620123	330431	325998	448316
Q7TQD2	Q7TQD2	Tubulin polymerization-promoting protein	Tppp	sp|Q7TQD2|TPPP_MOUSE Tubulin polymerization-promoting protein OS=Mus musculus OX=10090 GN=Tppp PE=1 SV=1	1	490483	430182	7415900	5876300	4960500	4252300	3436100	6145900	5869000	4228700	4110800	6557700	400566	5450200	5240100	5977300	6111500	3924600	6452700	4955500	2699100	385656	323890	478808	4181400	5309500	451250	4341300	620123	6323900	325998	5225100
Q7TRD9	Q7TRD9	Olfactory receptor 890	Olfr890	tr|Q7TRD9|Q7TRD9_MOUSE Olfactory receptor 890 OS=Mus musculus OX=10090 GN=Olfr890 PE=4 SV=1	1	212780000	909110000	823200000	876250000	1080600000	847320000	711430000	1119000000	829900000	731570000	970570000	1122600000	889290000	337730000	1032700000	1297700000	1102000000	579740000	1461300000	669530000	1100800000	875250000	834580000	946180000	560860000	673060000	640140000	809210000	619130000	1067400000	1214700000	1051900000
Q7TT50	Q7TT50	Serine/threonine-protein kinase MRCK beta	Cdc42bpb	sp|Q7TT50|MRCKB_MOUSE Serine/threonine-protein kinase MRCK beta OS=Mus musculus OX=10090 GN=Cdc42bpb PE=1 SV=2	2	490483	430182	396905	356080	346898	499532	560352	319865	360188	350936	336680	361612	400566	376107	409718	389028	342233	7182600	312879	9952500	580933	385656	323890	478808	466503	344674	451250	415610	10221000	330431	325998	448316
Q80SX0	Q80SX0;Q99JV5	StAR-related lipid transfer protein 4	Stard4	tr|Q80SX0|Q80SX0_MOUSE StAR-related lipid transfer protein 4 OS=Mus musculus OX=10090 GN=Stard4 PE=1 SV=1;sp|Q99JV5|STAR4_MOUSE StAR-related lipid transfer protein 4 OS=Mus musculus OX=10090 GN=Stard4 PE=1 SV=1	3	490483	3235600	396905	4562900	346898	499532	560352	319865	3918700	350936	336680	361612	400566	376107	409718	389028	342233	747486	312879	746728	580933	385656	323890	478808	466503	344674	451250	4350700	620123	330431	325998	448316
Q80V26	Q80V26	Inositol monophosphatase 3	Impad1	sp|Q80V26|IMPA3_MOUSE Golgi-resident adenosine 3,5-bisphosphate 3-phosphatase OS=Mus musculus OX=10090 GN=Bpnt2 PE=1 SV=1	2	490483	8066200	396905	356080	13338000	9509500	11264000	11312000	360188	11977000	11732000	19180000	400566	11058000	13849000	10651000	10438000	8731300	15287000	746728	580933	385656	17748000	478808	14356000	7027400	12619000	415610	9965900	14103000	12139000	11117000
Q80VJ3	Q80VJ3	2-deoxynucleoside 5-phosphate N-hydrolase 1	Dnph1	sp|Q80VJ3|DNPH1_MOUSE 2-deoxynucleoside 5-phosphate N-hydrolase 1 OS=Mus musculus OX=10090 GN=Dnph1 PE=1 SV=2	1	490483	430182	7882600	356080	346898	499532	560352	319865	360188	350936	2656200	3721900	400566	376107	409718	389028	342233	4782400	3673700	3895400	580933	385656	6420200	478808	466503	344674	4804500	415610	3216500	330431	325998	3905600
Q80WQ2	Q80WQ2;A0A1D5RLY2	Protein VAC14 homolog	Vac14	sp|Q80WQ2|VAC14_MOUSE Protein VAC14 homolog OS=Mus musculus OX=10090 GN=Vac14 PE=1 SV=1	3	490483	430182	396905	356080	346898	499532	390700	319865	360188	369550	368460	361612	400566	376107	409718	389028	342233	5969000	312879	5135500	580933	218960	323890	478808	466503	257620	451250	415610	5065800	330431	415440	448316
Q80WQ6	Q80WQ6	Inactive rhomboid protein 2	Rhbdf2	sp|Q80WQ6|RHDF2_MOUSE Inactive rhomboid protein 2 OS=Mus musculus OX=10090 GN=Rhbdf2 PE=1 SV=1	1	490483	430182	396905	356080	346898	499532	560352	319865	360188	350936	336680	361612	400566	376107	409718	389028	342233	747486	312879	746728	580933	385656	323890	478808	466503	344674	451250	415610	620123	330431	325998	448316
Q80X73	Q80X73	Protein pelota homolog	Pelo	sp|Q80X73|PELO_MOUSE Protein pelota homolog OS=Mus musculus OX=10090 GN=Pelo PE=1 SV=3	1	490483	430182	396905	356080	346898	499532	560352	319865	360188	350936	336680	361612	400566	376107	409718	389028	342233	826790	312879	798840	580933	385656	323890	478808	466503	344674	451250	415610	498800	330431	325998	448316
Q80Y55	Q80Y55;B2KGE3	BSD domain-containing protein 1	Bsdc1	sp|Q80Y55|BSDC1_MOUSE BSD domain-containing protein 1 OS=Mus musculus OX=10090 GN=Bsdc1 PE=1 SV=1;tr|B2KGE3|B2KGE3_MOUSE BSD domain-containing protein 1 (Fragment) OS=Mus musculus OX=10090 GN=Bsdc1 PE=1 SV=1	3	490483	4541200	6387100	5473800	6574500	6255900	560352	8259400	6532100	7029500	5942700	9328500	10435000	6536800	6523000	9477100	7409800	5392200	7226800	4878600	580933	8452500	6324900	5133300	466503	9349700	8556200	6725700	620123	7744200	7932000	4449500
Q80YR5	Q80YR5;F6XJ79;F6Z0Y5	Scaffold attachment factor B2	Safb2	sp|Q80YR5|SAFB2_MOUSE Scaffold attachment factor B2 OS=Mus musculus OX=10090 GN=Safb2 PE=1 SV=2	2	538630	325260	536900	407760	439720	397360	390920	312550	304720	496500	330780	487800	580140	375960	409718	390890	280150	552620	238620	618930	580933	608290	317790	478808	500440	365900	398850	310100	525970	330470	366160	382960
Q810D6	Q810D6	Glutamate-rich WD repeat-containing protein 1	Grwd1	sp|Q810D6|GRWD1_MOUSE Glutamate-rich WD repeat-containing protein 1 OS=Mus musculus OX=10090 GN=Grwd1 PE=1 SV=2	1	5260600	5872900	6405900	5186400	5113000	7479700	5487500	5711800	5912400	5081500	6351900	7941000	5003600	4246500	5179900	5937000	5553400	4478300	5826500	4781700	580933	5798500	7620100	5319900	4022700	7354100	5961200	5664800	4963300	6324600	5760300	6438400
Q810J8	Q810J8	Zinc finger FYVE domain-containing protein 1	Zfyve1	sp|Q810J8|ZFYV1_MOUSE Zinc finger FYVE domain-containing protein 1 OS=Mus musculus OX=10090 GN=Zfyve1 PE=1 SV=2	2	490483	430182	396905	1910900	346898	499532	560352	319865	360188	350936	336680	361612	400566	376107	409718	389028	342233	3453600	312879	3573500	580933	385656	323890	478808	466503	344674	451250	415610	3263200	330431	325998	448316
Q8BFP9	Q8BFP9	[Pyruvate dehydrogenase (acetyl-transferring)] kinase isozyme 1, mitochondrial	Pdk1	sp|Q8BFP9|PDK1_MOUSE [Pyruvate dehydrogenase (acetyl-transferring)] kinase isozyme 1, mitochondrial OS=Mus musculus OX=10090 GN=Pdk1 PE=1 SV=2	3	490483	430182	396905	356080	346898	499532	5440400	319865	360188	350936	336680	361612	400566	376107	409718	389028	342233	18792000	312879	17464000	580933	385656	323890	478808	466503	344674	451250	415610	15138000	330431	325998	448316
Q8BFU3-5	Q8BFU3-5;Q8BFU3-2;Q8BFU3-3;Q8BFU3;Q8BFU3-4	RING finger protein 214	Rnf214	sp|Q8BFU3-5|RN214_MOUSE Isoform 5 of RING finger protein 214 OS=Mus musculus OX=10090 GN=Rnf214;sp|Q8BFU3-2|RN214_MOUSE Isoform 2 of RING finger protein 214 OS=Mus musculus OX=10090 GN=Rnf214;sp|Q8BFU3-3|RN214_MOUSE Isoform 3 of RING finger protein 214 OS=	2	32769000	24117000	33416000	39158000	31220000	24493000	33364000	25790000	33207000	33124000	32322000	27793000	400566	37780000	33404000	48813000	42139000	747486	28207000	30021000	580933	39220000	31847000	27441000	466503	41201000	43401000	415610	620123	330431	30385000	31719000
Q8BFZ3	Q8BFZ3	Beta-actin-like protein 2	Actbl2	sp|Q8BFZ3|ACTBL_MOUSE Beta-actin-like protein 2 OS=Mus musculus OX=10090 GN=Actbl2 PE=1 SV=1	1	14455000	9495800	15992000	9302700	8519800	15487000	11319000	9729900	12959000	11207000	13059000	10900000	8735900	13310000	9754700	11362000	10611000	10578000	312879	746728	580933	385656	323890	478808	8784700	344674	451250	415610	7013600	330431	10786000	448316
Q8BG93	Q8BG93	Probable 8-oxo-dGTP diphosphatase NUDT15	Nudt15	sp|Q8BG93|NUD15_MOUSE Nucleotide triphosphate diphosphatase NUDT15 OS=Mus musculus OX=10090 GN=Nudt15 PE=1 SV=1	1	490483	18688000	16261000	13845000	21612000	27439000	18745000	21131000	360188	15551000	16208000	19679000	21168000	16533000	15719000	13220000	20695000	747486	22731000	13907000	16748000	27912000	17465000	19330000	19092000	21631000	451250	19654000	620123	18831000	325998	14087000
Q8BGA9	Q8BGA9;A0A2I3BQ74	Mitochondrial inner membrane protein OXA1L	Oxa1l	sp|Q8BGA9|OXA1L_MOUSE Mitochondrial inner membrane protein OXA1L OS=Mus musculus OX=10090 GN=Oxa1l PE=1 SV=1;tr|A0A2I3BQ74|A0A2I3BQ74_MOUSE Mitochondrial inner membrane protein OXA1L (Fragment) OS=Mus musculus OX=10090 GN=Oxa1l PE=1 SV=1	2	490483	430182	396905	356080	346898	499532	650900	319865	360188	350936	336680	361612	400566	376107	409718	389028	342233	2449000	312879	2223300	580933	385656	323890	478808	466503	344674	298350	415610	1283000	330431	325998	448316
Q8BGB7-2	Q8BGB7-2;Q8BGB7	Enolase-phosphatase E1	Enoph1	sp|Q8BGB7-2|ENOPH_MOUSE Isoform 2 of Enolase-phosphatase E1 OS=Mus musculus OX=10090 GN=Enoph1;sp|Q8BGB7|ENOPH_MOUSE Enolase-phosphatase E1 OS=Mus musculus OX=10090 GN=Enoph1 PE=1 SV=1	2	490483	430182	5657400	356080	346898	3709700	560352	319865	5307400	350936	336680	361612	400566	5443100	409718	6404300	7002900	4962000	312879	746728	580933	385656	8200400	478808	466503	5444500	5319000	415610	620123	330431	5365100	448316
Q8BGH2	Q8BGH2	Sorting and assembly machinery component 50 homolog	Samm50	sp|Q8BGH2|SAM50_MOUSE Sorting and assembly machinery component 50 homolog OS=Mus musculus OX=10090 GN=Samm50 PE=1 SV=1	9	490483	9896400	9019700	14317000	11993000	10906000	8278900	4841600	3501500	10902000	6513500	6880400	13679000	3995700	7920900	6578500	10455000	23883000	9077100	25910000	580933	20202000	14045000	10212000	8289500	344674	5967400	8156400	16485000	11467000	19175000	28851000
Q8BGN3	Q8BGN3;D3YU63;F6R291;A0A1B0GS66	Ectonucleotide pyrophosphatase/phosphodiesterase family member 6	Enpp6	sp|Q8BGN3|ENPP6_MOUSE Glycerophosphocholine cholinephosphodiesterase ENPP6 OS=Mus musculus OX=10090 GN=Enpp6 PE=1 SV=1;tr|D3YU63|D3YU63_MOUSE Choline-specific glycerophosphodiester phosphodiesterase OS=Mus musculus OX=10090 GN=Enpp6 PE=1 SV=1	3	490483	10786000	22366000	732420000	48441000	17427000	46242000	30522000	39842000	43532000	38777000	47956000	39984000	42207000	11118000	28098000	42448000	38422000	312879	746728	580933	42652000	26596000	478808	12681000	42756000	55775000	34073000	620123	45927000	35322000	33064000
Q8BGR9-2	Q8BGR9-2;Q8BGR9	Ubiquitin-like domain-containing CTD phosphatase 1	Ublcp1	sp|Q8BGR9-2|UBCP1_MOUSE Isoform 2 of Ubiquitin-like domain-containing CTD phosphatase 1 OS=Mus musculus OX=10090 GN=Ublcp1;sp|Q8BGR9|UBCP1_MOUSE Ubiquitin-like domain-containing CTD phosphatase 1 OS=Mus musculus OX=10090 GN=Ublcp1 PE=1 SV=1	1	490483	6250400	396905	356080	14672000	5693300	6154400	6293600	7244800	5012300	5829900	6194300	5980100	6970000	409718	5699000	342233	5122900	312879	7017800	580933	385656	9670900	5697200	4448600	7838900	5961800	7180000	6459900	6816100	325998	4378500
Q8BGT7	Q8BGT7	Survival of motor neuron-related-splicing factor 30	Smndc1	sp|Q8BGT7|SPF30_MOUSE Survival of motor neuron-related-splicing factor 30 OS=Mus musculus OX=10090 GN=Smndc1 PE=1 SV=1	1	976810	327870	619480	356450	208510	504030	679190	301330	82964	264550	624160	309690	404450	545700	141790	308070	233050	421430	160160	202480	580933	384320	211650	316630	475710	424620	371230	607970	341950	316750	329620	385270
Q8BGX0-3	Q8BGX0-3;Q8BGX0-2;Q8BGX0	E3 ubiquitin-protein ligase TRIM23	Trim23	sp|Q8BGX0-3|TRI23_MOUSE Isoform 3 of E3 ubiquitin-protein ligase TRIM23 OS=Mus musculus OX=10090 GN=Trim23;sp|Q8BGX0-2|TRI23_MOUSE Isoform 2 of E3 ubiquitin-protein ligase TRIM23 OS=Mus musculus OX=10090 GN=Trim23;sp|Q8BGX0|TRI23_MOUSE E3 ubiquitin-protein	1	10761000	9895300	12699000	356080	13987000	9395500	13904000	14268000	12199000	12119000	17398000	16554000	13754000	14646000	19673000	17410000	12764000	21985000	13229000	18816000	17467000	13373000	15765000	9727500	17022000	19716000	22251000	19147000	22117000	20470000	11022000	16767000
Q8BGY7	Q8BGY7	Protein FAM210A	Fam210a	sp|Q8BGY7|F210A_MOUSE Protein FAM210A OS=Mus musculus OX=10090 GN=Fam210a PE=1 SV=1	2	5441300	4793500	5327600	356080	346898	499532	560352	319865	6677600	7906800	336680	6288900	6531500	5661700	409718	389028	13842000	747486	6480700	10834000	3760300	6810400	7787500	6570200	466503	344674	451250	415610	620123	330431	325998	448316
Q8BH58	Q8BH58	TIP41-like protein	Tiprl	sp|Q8BH58|TIPRL_MOUSE TIP41-like protein OS=Mus musculus OX=10090 GN=Tiprl PE=1 SV=1	3	2422100	430182	3323900	2131100	346898	2344100	3233500	319865	2599100	2740900	2794900	2167200	2857900	4166300	3932900	389028	342233	6928000	2051700	5796700	580933	2687800	3199800	478808	3546100	2686400	2941300	2552500	4809100	1841200	325998	2489000
Q8BH59	Q8BH59;V9GXX9	Calcium-binding mitochondrial carrier protein Aralar1	Slc25a12	sp|Q8BH59|CMC1_MOUSE Calcium-binding mitochondrial carrier protein Aralar1 OS=Mus musculus OX=10090 GN=Slc25a12 PE=1 SV=1	6	490483	6337200	6921400	8892600	346898	1354100	8135500	319865	5611000	6120100	336680	5925200	1937800	376107	7226000	389028	9829200	44042000	17005000	31743000	580933	6388300	3047900	6562600	466503	344674	451250	415610	13329000	7580700	11570000	7611600
Q8BHC0	Q8BHC0	Lymphatic vessel endothelial hyaluronic acid receptor 1	Lyve1	sp|Q8BHC0|LYVE1_MOUSE Lymphatic vessel endothelial hyaluronic acid receptor 1 OS=Mus musculus OX=10090 GN=Lyve1 PE=1 SV=1	2	13510000	430182	5249700	5879600	5357200	27902000	7782300	16341000	8824900	7395000	9567200	8197500	6678100	12253000	9471800	21163000	342233	6061800	312879	746728	580933	7641900	4760500	5773300	466503	15042000	451250	7085100	5372200	330431	8523900	7932600
Q8BHC4	Q8BHC4;B0QZX9	Dephospho-CoA kinase domain-containing protein	Dcakd	sp|Q8BHC4|DCAKD_MOUSE Dephospho-CoA kinase domain-containing protein OS=Mus musculus OX=10090 GN=Dcakd PE=1 SV=1;tr|B0QZX9|B0QZX9_MOUSE Dephospho-CoA kinase domain-containing protein (Fragment) OS=Mus musculus OX=10090 GN=Dcakd PE=1 SV=1	2	490483	290720	227090	292750	347490	190350	556180	250040	279080	350936	317650	306390	339490	289610	345710	349690	283780	6981600	235890	7499500	580933	311100	363020	294060	566090	476080	271280	259330	6478800	449580	291250	315560
Q8BHI7	Q8BHI7;D3Z136;D3Z0Z6	Elongation of very long chain fatty acids protein 5;Elongation of very long chain fatty acids protein	Elovl5	sp|Q8BHI7|ELOV5_MOUSE Elongation of very long chain fatty acids protein 5 OS=Mus musculus OX=10090 GN=Elovl5 PE=1 SV=1;tr|D3Z136|D3Z136_MOUSE Elongation of very long chain fatty acids protein (Fragment) OS=Mus musculus OX=10090 GN=Elovl5 PE=1 SV=1;tr|D3Z0Z	2	490483	4023300	3104500	3054000	3881600	499532	26582000	319865	2935300	5700000	336680	361612	400566	376107	2275600	389028	2898900	151330000	4181100	147790000	580933	3209800	2910700	478808	1918400	344674	451250	415610	92508000	330431	4496200	448316
Q8BHN0-2	Q8BHN0-2;Q8BHN0	Protein phosphatase 1L	Ppm1l	sp|Q8BHN0-2|PPM1L_MOUSE Isoform 2 of Protein phosphatase 1L OS=Mus musculus OX=10090 GN=Ppm1l;sp|Q8BHN0|PPM1L_MOUSE Protein phosphatase 1L OS=Mus musculus OX=10090 GN=Ppm1l PE=1 SV=1	1	490483	430182	396905	356080	346898	499532	3319600	319865	360188	2227700	336680	361612	400566	2717400	3584000	3780000	4317900	747486	312879	746728	580933	385656	3434800	478808	2601400	2201600	451250	2960500	620123	330431	325998	448316
Q8BIG7	Q8BIG7;H3BJ37	Catechol O-methyltransferase domain-containing protein 1	Comtd1	sp|Q8BIG7|CMTD1_MOUSE Catechol O-methyltransferase domain-containing protein 1 OS=Mus musculus OX=10090 GN=Comtd1 PE=1 SV=1;tr|H3BJ37|H3BJ37_MOUSE Catechol O-methyltransferase domain-containing protein 1 OS=Mus musculus OX=10090 GN=Comtd1 PE=1 SV=1	4	490483	430182	396905	356080	1444300	499532	1619400	319865	360188	350936	336680	361612	400566	376107	409718	389028	342233	14027000	2014900	7074700	580933	1440300	1515700	478808	1507100	1365700	1445300	415610	4243900	2459800	1999300	1569100
Q8BIW1	Q8BIW1	Protein prune homolog	Prune	sp|Q8BIW1|PRUN1_MOUSE Exopolyphosphatase PRUNE1 OS=Mus musculus OX=10090 GN=Prune1 PE=1 SV=1	2	490483	430182	396905	356080	346898	499532	560352	815530	360188	350936	336680	361612	1047100	818550	409718	389028	1088300	4360400	312879	3907400	580933	385656	2232100	478808	1933700	344674	451250	415610	3733100	1497800	325998	448316
Q8BJ03-2	Q8BJ03-2;Q8BJ03	Cytochrome c oxidase assembly protein COX15 homolog	Cox15	sp|Q8BJ03-2|COX15_MOUSE Isoform 2 of Cytochrome c oxidase assembly protein COX15 homolog OS=Mus musculus OX=10090 GN=Cox15;sp|Q8BJ03|COX15_MOUSE Cytochrome c oxidase assembly protein COX15 homolog OS=Mus musculus OX=10090 GN=Cox15 PE=1 SV=1	2	490483	430182	396905	356080	346898	499532	2173000	319865	360188	350936	336680	361612	400566	376107	409718	389028	342233	4244800	1639500	8127300	580933	385656	323890	478808	466503	344674	2290800	415610	3744300	330431	325998	448316
Q8BJ05-2	Q8BJ05-2;Q8BJ05-3;Q8BJ05	Zinc finger CCCH domain-containing protein 14	Zc3h14	sp|Q8BJ05-2|ZC3HE_MOUSE Isoform 2 of Zinc finger CCCH domain-containing protein 14 OS=Mus musculus OX=10090 GN=Zc3h14;sp|Q8BJ05-3|ZC3HE_MOUSE Isoform 3 of Zinc finger CCCH domain-containing protein 14 OS=Mus musculus OX=10090 GN=Zc3h14;sp|Q8BJ05|ZC3HE_MOUS	1	426830	659560	412370	294280	499450	420090	527440	323980	359750	309650	328930	352260	399130	464750	538890	707970	408100	518620	330840	516850	303600	318940	493990	337860	514050	381780	573640	416350	479170	562890	370290	543940
Q8BJL9	Q8BJL9	UDP-glucuronosyltransferase	Ugt2b35	tr|Q8BJL9|Q8BJL9_MOUSE UDP-glucuronosyltransferase OS=Mus musculus OX=10090 GN=Ugt2b35 PE=1 SV=1	7	490483	430182	2191000	356080	346898	499532	5721400	2941800	1495500	350936	336680	361612	1967000	376107	2547900	389028	3145800	26394000	13672000	17656000	4907500	4043800	10415000	478808	7544300	5177200	4294900	415610	29031000	11377000	6503100	4725500
Q8BJY1	Q8BJY1;F7BA91	26S proteasome non-ATPase regulatory subunit 5	Psmd5	sp|Q8BJY1|PSMD5_MOUSE 26S proteasome non-ATPase regulatory subunit 5 OS=Mus musculus OX=10090 GN=Psmd5 PE=1 SV=4	10	490483	430182	396905	356080	306140	499532	1929700	319865	343340	349460	336680	361612	349930	306500	357120	389028	342233	23447000	432270	32204000	580933	385656	323890	478808	466503	344674	451250	415610	28821000	330431	356760	89274
Q8BJZ4	Q8BJZ4;A0A0R4J0L6;A0A0N4SV23	28S ribosomal protein S35, mitochondrial	Mrps35	sp|Q8BJZ4|RT35_MOUSE 28S ribosomal protein S35, mitochondrial OS=Mus musculus OX=10090 GN=Mrps35 PE=1 SV=2;tr|A0A0R4J0L6|A0A0R4J0L6_MOUSE 28S ribosomal protein S35, mitochondrial OS=Mus musculus OX=10090 GN=Mrps35 PE=1 SV=1;tr|A0A0N4SV23|A0A0N4SV23_MOUSE 2	3	6255800	430182	6357000	7442600	7853900	6891700	9954300	319865	6537900	6155400	4659300	361612	8672500	376107	15052000	10405000	3461200	15445000	14954000	9630200	580933	385656	13367000	478808	12522000	9721700	5605800	415610	15694000	7692400	10396000	8814100
Q8BK64	Q8BK64	Activator of 90 kDa heat shock protein ATPase homolog 1	Ahsa1	sp|Q8BK64|AHSA1_MOUSE Activator of 90 kDa heat shock protein ATPase homolog 1 OS=Mus musculus OX=10090 GN=Ahsa1 PE=1 SV=2	3	490483	430182	396905	12705000	11466000	499532	9187900	9520700	360188	10517000	336680	361612	4162300	376107	409718	389028	342233	43973000	312879	29530000	580933	5093900	10392000	478808	6931100	4632600	451250	415610	58389000	330431	10872000	448316
Q8BKZ9	Q8BKZ9;A2AWH8;A2AWH7	Pyruvate dehydrogenase protein X component, mitochondrial	Pdhx	sp|Q8BKZ9|ODPX_MOUSE Pyruvate dehydrogenase protein X component, mitochondrial OS=Mus musculus OX=10090 GN=Pdhx PE=1 SV=1;tr|A2AWH8|A2AWH8_MOUSE Pyruvate dehydrogenase protein X component, mitochondrial OS=Mus musculus OX=10090 GN=Pdhx PE=1 SV=1	4	6892100	6986500	11644000	356080	346898	499532	5470100	319865	7710200	9701700	8485400	4309700	400566	9378800	9916600	12679000	14055000	43018000	14885000	30729000	580933	15342000	19544000	4819800	10325000	4859600	11157000	415610	27164000	18349000	18272000	10986000
Q8BLI0	Q8BLI0	ADAMTS-like protein 1	Adamtsl1	sp|Q8BLI0|ATL1_MOUSE ADAMTS-like protein 1 OS=Mus musculus OX=10090 GN=Adamtsl1 PE=2 SV=2	1	490483	430182	10721000	11686000	11692000	499532	10584000	12953000	11852000	13920000	336680	10204000	14215000	13905000	409718	389028	342233	15290000	13474000	14886000	580933	11687000	20483000	13445000	14586000	12834000	11843000	415610	15654000	15453000	14283000	12751000
Q8BLN5	Q8BLN5	Lanosterol synthase	Lss	sp|Q8BLN5|LSS_MOUSE Lanosterol synthase OS=Mus musculus OX=10090 GN=Lss PE=1 SV=2	3	490483	2245300	2562200	4352300	346898	3336700	4459600	319865	360188	350936	336680	4601800	400566	376107	409718	389028	342233	5409700	312879	4572900	580933	385656	323890	478808	466503	344674	451250	415610	4751400	330431	4373000	2821000
Q8BMA6	Q8BMA6;A2AAN2	Signal recognition particle subunit SRP68	Srp68	sp|Q8BMA6|SRP68_MOUSE Signal recognition particle subunit SRP68 OS=Mus musculus OX=10090 GN=Srp68 PE=1 SV=2;tr|A2AAN2|A2AAN2_MOUSE Signal recognition particle subunit SRP68 OS=Mus musculus OX=10090 GN=Srp68 PE=1 SV=1	5	490483	430182	396905	356080	346898	499532	190700	319865	360188	174020	336680	416200	400566	376107	409718	389028	342233	16725000	145390	14201000	580933	161650	211110	478808	253400	344674	451250	415610	17732000	330431	325998	448316
Q8BMJ2	Q8BMJ2;A0A494BBF9	Leucine--tRNA ligase, cytoplasmic	Lars	sp|Q8BMJ2|SYLC_MOUSE Leucine--tRNA ligase, cytoplasmic OS=Mus musculus OX=10090 GN=Lars1 PE=1 SV=2	7	446620	430182	817870	356080	667780	499532	1025400	319865	360188	683430	506990	361612	400566	452690	864260	389028	342233	40544000	595920	17217000	580933	385656	1729300	440710	1546100	344674	451250	415610	37078000	387050	1326100	448316
Q8BMJ3	Q8BMJ3	Eukaryotic translation initiation factor 1A, X-chromosomal	Eif1ax	sp|Q8BMJ3|IF1AX_MOUSE Eukaryotic translation initiation factor 1A, X-chromosomal OS=Mus musculus OX=10090 GN=Eif1ax PE=2 SV=3	1	490483	5261600	396905	356080	4370100	499532	560352	319865	4166700	3225400	4524000	6670000	3744300	5446300	4590700	6160100	342233	747486	4890700	746728	5464400	385656	323890	478808	466503	5987500	4050200	3421300	620123	5648700	325998	2335800
Q8BNI4	Q8BNI4;J3QMQ7;J3QMF4;Q3U957;Q8BNI4-2	Derlin-2	Derl2	sp|Q8BNI4|DERL2_MOUSE Derlin-2 OS=Mus musculus OX=10090 GN=Derl2 PE=1 SV=2;tr|J3QMQ7|J3QMQ7_MOUSE Derlin-2 OS=Mus musculus OX=10090 GN=Derl2 PE=1 SV=1;tr|J3QMF4|J3QMF4_MOUSE Derlin-2 OS=Mus musculus OX=10090 GN=Derl2 PE=1 SV=1;tr|Q3U957|Q3U957_MOUSE Derlin	2	490483	430182	396905	356080	346898	499532	560352	319865	360188	350936	336680	361612	400566	376107	409718	389028	342233	14231000	312879	15067000	580933	385656	323890	478808	466503	344674	451250	415610	620123	330431	325998	448316
Q8BNN3	Q8BNN3;A0A2I3BRU0;Q99LG4	Tetratricopeptide repeat protein 5	Ttc5	tr|Q8BNN3|Q8BNN3_MOUSE Tetratricopeptide repeat protein 5 OS=Mus musculus OX=10090 GN=Ttc5 PE=1 SV=1;tr|A0A2I3BRU0|A0A2I3BRU0_MOUSE Tetratricopeptide repeat protein 5 OS=Mus musculus OX=10090 GN=Ttc5 PE=1 SV=1;sp|Q99LG4|TTC5_MOUSE Tetratricopeptide repeat	1	490483	430182	396905	356080	346898	499532	560352	319865	360188	350936	336680	361612	400566	376107	409718	389028	342233	747486	312879	746728	580933	385656	323890	478808	466503	344674	451250	415610	620123	330431	325998	448316
Q8BP92	Q8BP92	Reticulocalbin-2	Rcn2	sp|Q8BP92|RCN2_MOUSE Reticulocalbin-2 OS=Mus musculus OX=10090 GN=Rcn2 PE=1 SV=1	3	8323000	4479000	396905	356080	346898	16537000	5334700	11381000	360188	350936	8302500	13134000	400566	5787600	409718	11449000	342233	747486	312879	746728	580933	385656	323890	478808	466503	344674	451250	415610	620123	330431	325998	448316
Q8BPE4	Q8BPE4	Transmembrane protein 177	Tmem177	sp|Q8BPE4|TM177_MOUSE Transmembrane protein 177 OS=Mus musculus OX=10090 GN=Tmem177 PE=1 SV=1	1	490483	430182	396905	356080	346898	499532	560352	319865	360188	350936	336680	361612	400566	376107	409718	389028	342233	747486	312879	746728	580933	385656	323890	478808	466503	344674	451250	415610	620123	330431	325998	448316
Q8BPG6	Q8BPG6	Sulfatase-modifying factor 2	Sumf2	sp|Q8BPG6|SUMF2_MOUSE Inactive C-alpha-formylglycine-generating enzyme 2 OS=Mus musculus OX=10090 GN=Sumf2 PE=1 SV=2	1	8025600	5735400	8807800	356080	346898	12627000	560352	319865	7212000	350936	6932400	361612	400566	376107	409718	389028	7233600	3731500	312879	746728	580933	385656	323890	478808	6176400	7699000	9026800	13592000	620123	330431	325998	9848500
Q8BR90-2	Q8BR90-2;Q8BR90	UPF0600 protein C5orf51 homolog		sp|Q8BR90-2|CE051_MOUSE Isoform 2 of UPF0600 protein C5orf51 homolog OS=Mus musculus OX=10090;sp|Q8BR90|CE051_MOUSE UPF0600 protein C5orf51 homolog OS=Mus musculus OX=10090 PE=1 SV=1	2	490483	4609700	4309700	2746900	5604500	3997500	4875700	4374600	3846800	5459000	2632500	4763200	4733900	4846800	3546500	5264300	4080900	5022700	312879	5510100	580933	4178500	5817400	478808	4672500	4580500	4254600	4367200	7393900	4226100	4496900	3212500
Q8BRF7-3	Q8BRF7-3;Q8BRF7;Q8BRF7-2;A0A1W2P6R7	Sec1 family domain-containing protein 1	Scfd1	sp|Q8BRF7-3|SCFD1_MOUSE Isoform 3 of Sec1 family domain-containing protein 1 OS=Mus musculus OX=10090 GN=Scfd1;sp|Q8BRF7|SCFD1_MOUSE Sec1 family domain-containing protein 1 OS=Mus musculus OX=10090 GN=Scfd1 PE=1 SV=1;sp|Q8BRF7-2|SCFD1_MOUSE Isoform 2 of Se	5	490483	430182	396905	356080	346898	499532	1978000	319865	360188	350936	336680	361612	400566	376107	409718	389028	342233	19101000	312879	15610000	580933	385656	323890	478808	466503	344674	451250	415610	14230000	330431	325998	448316
[truncated: 2,517 more rows]
