# Supplementary material for: Integrated liver and serum proteomics uncover sexual dimorphism and alteration of several immune response proteins in an aging Werner syndrome mouse model
Source: Aging (Albany NY). 2024 May 24;16(10):8417–45. doi: 10.18632/aging.205866 (PMC11164518; doi:10.18632/aging.205866)
Supplement: Supplementary Table 3 [file aging-16-205866-s004.xls]

## Sheet: Column header
Column header	Description
ACCESSION	UniProt accession number for the leading protein of the group
PROTEIN_NAMES	Protein names for the group
GENE_NAMES	Gene names for the proteins of the group
FWrn10m_2868	LFQ intensities, normalized and imputed.
FWrn10m_2869
FWrn10m_2870
FWrn10m_2871
FWrn4m_3065
FWrn4m_3066
FWrn4m_3082
FWrn4m_3083
FWT10m_2854
FWT10m_2856
FWT10m_2882
FWT10m_2883
FWT4m_3002
FWT4m_3003
FWT4m_3021
FWT4m_3022
MWrn10m_2970
MWrn10m_2971
MWrn10m_2972
MWrn10m_2973
MWrn4m_3026
MWrn4m_3029
MWrn4m_3123
MWrn4m_3124
MWT10m_3048
MWT10m_3049
MWT10m_3051
MWT10m_3052
MWT4m_3000
MWT4m_3001
MWT4m_3014
MWT4m_3017
mean_g1	Mean of intensities for group g1 (all females)
mean_g2	Mean of intensities for group g2 (all males)
Ratio_g1g2	Ratio is computed as mean of group g1 / mean of group g2
log2Ratio	Log2 of the ratio between group g1 and group g2
Foldchange	The fold change is computed as ratio when ratio >0 or 1/ratio when ratio <0
Log2Foldchange	Log2 of the fold change between group g1 and group g2
zscore	zscore = x - µ / σ, where x = log2(ratio), µ = average of all log2(ratio) et σ = standard deviation of all log2(ratio)
pval_Limma	p-value from Limma
Replacement of missing values: Missing values ​are replaced with a noise value corresponding to the 1st percentile of the values ​for each column (Red colored LFQ values in the table)

## Sheet: Supplementary Table 3
Supplementary Table 3. List of proteins in the liver significantly different between females and males.
Accession	ProteinNames	GeneNames	FWrn10m_2868	FWrn10m_2869	FWrn10m_2870	FWrn10m_2871	FWrn4m_3065	FWrn4m_3066	FWrn4m_3082	FWrn4m_3083	FWT10m_2854	FWT10m_2856	FWT10m_2882	FWT10m_2883	FWT4m_3002	FWT4m_3003	FWT4m_3021	FWT4m_3022	MWrn10m_2970	MWrn10m_2971	MWrn10m_2972	MWrn10m_2973	MWrn4m_3026	MWrn4m_3029	MWrn4m_3123	MWrn4m_3124	MWT10m_3048	MWT10m_3049	MWT10m_3051	MWT10m_3052	MWT4m_3000	MWT4m_3001	MWT4m_3014	MWT4m_3017	mean_g1 FEMALE	mean_g2 MALE	Ratio_g1_g2 FEM_MAL	log2Ratio FEM_MAL	zscore FEM_MAL	pval_Limma FEM_MAL
A2AKN8	Major urinary protein 8	Mup8	490483	430182	396905	356080	9514500	499532	560352	319865	360188	350936	336680	361612	400566	376107	409718	389028	46414000	30338000	15632000	41221000	222210000	108860000	325790000	524640000	606700000	62535000	458730000	854210000	154820000	75799000	128810000	260420000	972046	2.44821e+08	0.00397044	-7.97648	-10.716	3.1008e-17
P11714	Cytochrome P450 2D9	Cyp2d9	812520	430182	664970	356080	1420100	499532	560352	319865	360188	350936	336680	361612	1420500	376107	181100	389028	63178000	387480000	36630000	254580000	94116000	87445000	136860000	34181000	87091000	35974000	80222000	60683000	365870000	153170000	125530000	67489000	552484	1.29406e+08	0.00426938	-7.87176	-10.5738	6.35225e-22
Q91YX5	Acyl-CoA:lysophosphatidylglycerol acyltransferase 1	Lpgat1	5754	21687	5763.7	9151.8	24465	44912	406570	4453.9	15868	6633.7	5241.8	26687	42355	6681.4	3932.8	3137.2	342233	29608000	312879	22974000	580933	3442.3	26665	478808	13647	344674	5492.4	6141.4	3086900	5612.1	3366	5629.8	39580.9	3.6124e+06	0.0109569	-6.51201	-8.72646	0.0168556
Q9Z0N2	Eukaryotic translation initiation factor 2 subunit 3, Y-linked	Eif2s3y	490483	430182	396905	356080	346898	499532	560352	319865	360188	350936	336680	361612	400566	376107	409718	389028	23913000	26979000	13140000	21411000	26690000	27380000	16129000	18297000	20175000	8617300	17344000	23254000	28001000	18426000	31216000	30116000	399071	2.1943e+07	0.0181867	-5.78097	-7.73331	4.59778e-30
E9Q1Y3	Apolipoprotein B-100;Apolipoprotein B-48	Apob	560550	1795500	523480	517890	176670	1565900	6103000	1522400	2529400	1672100	229310	575450	1882900	236630	1658500	652760	1736700	412160000	1582700	86278000	1666500	661010	935850	1943300	849880	317350	235320	244580	312960000	593170	171260	1778900	1.38765e+06	5.15072e+07	0.026941	-5.21405	-6.96312	0.188388
Q8CAQ8-2	MICOS complex subunit Mic60	Immt	284890	212970	470070	149570	326410	325880	3353800	837000	225000	1137100	324070	278060	405770	938200	354360	610710	283320	119390000	1688300	114220000	580933	3882600	2675800	498150	1049500	215010	451250	689580	67763000	1403200	6776100	1511900	639616	2.01924e+07	0.0316761	-4.98046	-6.64577	0.00311764
Q00898	Alpha-1-antitrypsin 1-5	Serpina1e	490483	430182	396905	356080	1016000	8588900	560352	319865	360188	350936	336680	361612	400566	376107	1430700	16823000	7260500	15108000	4588900	9295500	27519000	15750000	90167000	33732000	244000000	191340000	64477000	132430000	58383000	68405000	27329000	34373000	2.03741e+06	6.40099e+07	0.0318296	-4.97349	-6.63629	2.88135e-11
E9QKK8	Phospholipid-transporting ATPase;Phospholipid-transporting ATPase 11C	Atp11c	117510	466440	564430	294230	955240	181160	1467200	219450	149260	584110	330200	341250	366300	292660	555260	176800	272630	83438000	344930	71386000	245160	946210	1002300	299190	1070800	251580	595240	413470	56741000	680760	794300	327590	441344	1.36756e+07	0.0322724	-4.95355	-6.60921	0.0231551
Q9QXZ6	Solute carrier organic anion transporter family member 1A1	Slco1a1	2575700	794990	3841400	952150	1911400	11469000	4825300	1442400	5004200	350936	3570200	2310300	10724000	3275100	17908000	17463000	106580000	80343000	40756000	74424000	109490000	76929000	147250000	149100000	151390000	101930000	171420000	183850000	174660000	160800000	146920000	167880000	5.52613e+06	127732625	0.0432633	-4.53071	-6.03476	6.90607e-14
Q9DCY0	Glycine N-acyltransferase-like protein Keg1	Keg1	4394000	664780	331430	1675800	5687300	173290	18449000	831000	4242500	5196500	225280	3102600	544860	1102000	15224000	6631400	53081000	231970000	29100000	247030000	13151000	65167000	67499000	44159000	63223000	37736000	63072000	19217000	285930000	47958000	26071000	20305000	4.27973e+06	8.21668e+07	0.0520859	-4.26296	-5.671	2.85871e-09
Q9DBG1	Sterol 26-hydroxylase, mitochondrial	Cyp27a1	490483	2790200	392330	1974100	3736800	895900	18996000	2310700	3430100	2198900	3357600	351680	3260300	2830300	4256200	1688800	544080	264430000	2615400	252920000	389130	7913800	14670000	2647200	16768000	3672500	5026800	6612500	320940000	9612500	17646000	4471900	3.31002e+06	5.818e+07	0.0568928	-4.13561	-5.49798	0.00675652
Q8CC88	von Willebrand factor A domain-containing protein 8	Vwa8	284890	372110	485140	978380	817470	282630	6809300	663330	561750	2238500	457850	156280	1334100	399420	580830	383730	457250	111640000	663990	88350000	327690	1038100	519650	478808	1737800	320910	289140	415610	85937000	330431	1346100	764860	1.05036e+06	1.84136e+07	0.0570425	-4.13182	-5.49284	0.134681
B5X0G2	Major urinary protein 17	Mup17	25179000	272190000	299870000	154350000	526180000	40017000	305290000	403660000	172560000	349720000	109330000	197870000	184290000	143390000	241630000	12754000	1105600000	726580000	648730000	978950000	5153700000	2153600000	7472200000	7177900000	7014600000	917480000	4213300000	10849000000	2852200000	1689800000	1921100000	3362600000	214892500	3639833750	0.0590391	-4.08219	-5.42541	1.20863e-09
Q99MR8	Methylcrotonoyl-CoA carboxylase subunit alpha, mitochondrial	Mccc1	1120100	2250700	1425500	3052800	1015400	930900	14952000	848260	1910500	1390200	744550	1314000	1085900	2085000	1086900	893870	342233	195660000	1550900	222650000	854110	1162900	3508700	478808	2017800	1062700	1271400	415610	154100000	1761500	1626600	1847500	2.25666e+06	3.68944e+07	0.0611654	-4.03114	-5.35606	0.227539
Q5YD48-2	APOBEC1 complementation factor	A1cf	617740	603420	2019800	742510	826690	499532	3507300	586360	679460	680110	876020	552540	400566	376107	584540	389028	2086100	61097000	3196800	69162000	489960	1877200	2712900	604080	5971600	1180000	2107900	1765000	53195000	709280	787340	886950	871358	1.29893e+07	0.0670826	-3.89792	-5.17507	0.00186571
Q6PB66	Leucine-rich PPR motif-containing protein, mitochondrial	Lrpprc	528530	512470	549780	925440	828810	1002800	7480600	936560	570090	765800	489130	361612	264890	958170	601220	373580	747220	80071000	937410	70128000	931420	1302300	2883700	728370	2154900	2309100	1202700	691210	82190000	2102300	1922500	439570	1.07184e+06	1.56714e+07	0.068395	-3.86997	-5.13709	0.0066968
E9Q5K4	Isoform 2 of Cytochrome P450 2C44	Cyp2c44	476950	430182	125090	723280	1810900	577460	2527900	188340	360188	350936	957350	346890	124350	395150	2722000	2584700	217560	76756000	738350	51751000	293450	1488400	3363200	938370	6328200	3685700	1264800	915760	45224000	4207100	5727200	1260900	918854	1.276e+07	0.0720105	-3.79565	-5.03613	0.00204009
A2A998	Complement component C8 alpha chain	C8a	490483	430182	396905	356080	3147600	499532	560352	319865	360188	350936	336680	361612	400566	376107	2350900	389028	5827100	8032500	4702700	10522000	7365700	6991800	9121300	7269900	18233000	15078000	8365300	15324000	9668600	9425700	5699200	8163100	695439	9.36187e+06	0.0742842	-3.7508	-4.9752	2.58066e-16
Q9CQN1	Heat shock protein 75 kDa, mitochondrial	Trap1	2000500	417130	327240	228980	576380	2014400	10581000	223160	718980	320310	304940	1884100	351560	463180	481780	2026900	884780	99869000	2271100	81660000	580933	403780	314470	2916400	3478900	588290	2195800	1089800	109410000	1115900	664500	438000	1.43253e+06	1.92426e+07	0.0744459	-3.74766	-4.97094	0.0368874
Q3UQ44	Ras GTPase-activating-like protein IQGAP2	Iqgap2	1167600	8195100	4920700	8883600	1133800	822460	89479000	266450	3572400	2315000	3721700	1074700	5276300	4323600	2785500	6297800	780860	875760000	1019900	362990000	1113500	4863100	7023300	2877100	10581000	2330600	294570	2728900	443410000	5315700	14794000	689700	9.01473e+06	1.08536e+08	0.0830577	-3.58974	-4.75639	0.281322
A0A0R4J0I6	Acyl-CoA dehydrogenase family member 11	Acad11	544510	4167700	4960000	7419400	4343000	2200900	22663000	1956700	2860600	3804800	3057200	886210	2469300	3070300	2243300	1638400	780120	210600000	508290	308340000	1230600	4992000	3251200	478808	2077000	957820	451250	1038100	136620000	6228800	6339800	921920	4.26783e+06	4.2801e+07	0.0997134	-3.32607	-4.39818	0.68699
P23116	Eukaryotic translation initiation factor 3 subunit A	Eif3a	1191600	791840	1540400	875960	415990	2823900	6930600	536640	516230	812030	1273100	1090900	568510	854050	213880	600650	1008200	65059000	1886400	51723000	580933	3589800	1368400	68165	4757200	1327100	617510	1342200	50535000	1342300	1525100	1271500	1.31477e+06	1.17501e+07	0.111894	-3.1598	-4.17228	0.0549639
Q01279	Epidermal growth factor receptor	Egfr	10601000	18456000	7399800	15965000	34402000	52396000	14648000	15429000	18615000	16845000	9911600	16387000	12283000	9827900	41486000	8652100	66040000	137650000	23567000	153770000	104080000	77658000	211540000	148030000	354400000	126510000	109450000	251510000	429250000	170020000	94981000	98413000	18956525	1.59804e+08	0.118623	-3.07554	-4.05782	3.72438e-11
Q9QZD8	Mitochondrial dicarboxylate carrier	Slc25a10	490483	9528300	4899800	6389300	2808300	499532	25531000	460870	4761200	4997300	5186800	1823800	3425100	2612800	3250200	2592400	4150200	249130000	7203100	227610000	1607800	7885200	8710700	2629500	7961200	2191300	2561000	1739100	113140000	8142100	11897000	4268100	4.95357e+06	4.13016e+07	0.119936	-3.05966	-4.03624	0.0266475
Q9D880	Mitochondrial import inner membrane translocase subunit TIM50	Timm50	333500	919220	929000	984320	966570	309460	1751000	557290	813590	340740	903600	712750	1001500	859150	791660	974090	273910	48159000	312879	27016000	580933	1012400	1209700	384930	466503	344674	451250	1131700	21855000	330431	279180	448316	821715	6.51605e+06	0.126106	-2.98729	-3.93792	0.43899
Q5FW60	Major urinary protein 20	Mup20	38093000	62637000	80282000	90995000	92357000	57184000	71691000	129440000	111040000	63582000	85794000	94742000	105200000	74336000	156040000	81402000	537360000	316920000	434130000	253560000	1041100000	487450000	813120000	942840000	844310000	811750000	511020000	1529600000	351530000	779930000	550840000	717230000	8.71759e+07	682668125	0.127699	-2.96918	-3.91333	2.24435e-15
P33146	Cadherin-15	Cdh15	490483	430182	396905	356080	42885000	499532	560352	319865	360188	28832000	17040000	35115000	11438000	376107	409718	389028	40440000	23693000	31650000	28137000	85987000	64637000	83093000	98403000	104160000	88499000	65951000	86186000	35872000	66622000	86079000	78124000	8.74365e+06	6.67208e+07	0.131048	-2.93183	-3.86258	1.1988e-08
Q8BGL3	Sulfotransferase	Sult2a8	5325900	16342000	32766000	25507000	39752000	15258000	43200000	31681000	31716000	22479000	30061000	29504000	39366000	28777000	51689000	20260000	85670000	302770000	91777000	286830000	122500000	137150000	299920000	126090000	332430000	141740000	236760000	169840000	490840000	316690000	202380000	173650000	2.89802e+07	2.19815e+08	0.131839	-2.92315	-3.85078	1.08625e-12
P19157	Glutathione S-transferase P 1;Glutathione S-transferase P 2	Gstp1	3738200000	3269200000	3544400000	3288700000	3491600000	5631200000	3275500000	4059800000	3472500000	2815400000	4400200000	3770200000	3699400000	3985700000	4434800000	6781000000	18145000000	10606000000	13006000000	11224000000	48519000000	24961000000	37154000000	43844000000	38863000000	36233000000	28286000000	43052000000	15519000000	32725000000	27176000000	35233000000	3978612500	29034125000	0.137032	-2.86741	-3.77506	2.05654e-15
P55096	ATP-binding cassette sub-family D member 3	Abcd3	5486200	12869000	8882400	16100000	10423000	3850700	53810000	6616400	8657900	9869200	9478900	5228500	8264400	8826600	8091600	7038400	7895000	377470000	11605000	368640000	4932500	12400000	17019000	8356500	11457000	4557400	6521600	6045700	307560000	12697000	27764000	7606700	11468325	7.4533e+07	0.153869	-2.70022	-3.54793	0.0853687
Q921X9	Protein disulfide-isomerase A5	Pdia5	3922000	2378800	7377700	2840400	2876800	3610800	16620000	4257000	2020900	2619300	2774800	3239200	2888800	2865500	7590300	7745400	2490600	138080000	5544600	94603000	580933	6266600	10047000	3282000	22157000	6091900	2449000	5704400	108670000	9425700	18214000	3599400	4.72673e+06	2.73254e+07	0.17298	-2.53133	-3.31847	0.0354214
Q8CHQ9	Probable N-acetyltransferase CML2	Cml2	1636500	9096800	3259200	8835700	7200400	5812800	28675000	6292800	8688900	9163400	9744300	593750	7190900	561290	7106100	8383800	3248500	202580000	312879	160780000	2247400	12354000	19818000	7926800	23520000	3645400	6318900	10360000	220820000	11613000	18070000	2826100	7.6401e+06	4.41526e+07	0.173039	-2.53083	-3.3178	0.118824
Q62095	ATP-dependent RNA helicase DDX3Y;Putative ATP-dependent RNA helicase Pl10	Ddx3y	2119600	6885800	6159200	4730800	5633800	3411200	14128000	5602000	4534500	4643200	5348500	6056800	5511300	4638600	3892700	5397600	4179900	132990000	5487500	126610000	580933	7521300	10490000	4621600	9858400	8834300	5057700	6545500	154620000	7027000	9199300	3699900	5543350	3.10827e+07	0.178342	-2.48728	-3.25864	0.0822885
Q3UNX5	Acyl-coenzyme A synthetase ACSM3, mitochondrial	Acsm3	490483	3016600	8031800	3568500	6461900	3641700	12829000	3434800	8818200	8537500	2537600	7872700	9891200	11207000	3163000	2646600	15152000	66205000	14496000	43339000	36704000	22299000	40946000	28527000	17421000	15741000	27686000	22213000	66803000	42561000	25760000	32871000	6.00929e+06	32420250	0.185356	-2.43163	-3.18303	5.60908e-09
Q99JR1	Sideroflexin-1	Sfxn1	490483	996650	2637400	3735100	3826700	309470	16353000	2224600	2817200	3556200	382530	671930	288640	325870	3627500	2072400	587880	93088000	2571600	53269000	1533200	3675100	7057100	1905600	4824300	3221000	1939400	2247300	37963000	5520500	5668000	1761100	2.76973e+06	14177005	0.195368	-2.35574	-3.07992	0.0103883
P17427	AP-2 complex subunit alpha-2	Ap2a2	7387700	10480000	5648900	5720200	2823200	2288100	9939200	2664900	3375200	3274200	5538400	3624100	3100600	4704400	3175600	2831000	4839100	150040000	3992200	67266000	2172000	5960500	5894600	6552400	11337000	4208300	4823600	6745500	94654000	4896800	5182500	2093000	4.78598e+06	2.37911e+07	0.201167	-2.31353	-3.02259	0.0455443
Q3TXS7	26S proteasome non-ATPase regulatory subunit 1	Psmd1	353390	1218000	5339800	1554600	986250	232430	20429000	650980	4291700	2095100	1819200	620630	1285300	4406500	1207300	164960	733300	54708000	313840	78259000	580933	3268400	1664000	206220	5085500	1094500	1513500	283170	78927000	2697700	1542800	989240	2.91595e+06	1.44917e+07	0.201215	-2.31319	-3.02212	0.352078
Q68FD5	Clathrin heavy chain 1;Clathrin heavy chain	Cltc	3280000	3900500	2794200	10664000	6199600	2714200	113700000	2745700	2635400	6240000	5011300	2572700	2842700	3628200	5952900	8951200	3117200	315250000	2685700	246680000	474830	8778300	10414000	2257200	18693000	3630500	3837400	3056600	246430000	8849300	27244000	2653700	1.14895e+07	5.65032e+07	0.203343	-2.29801	-3.0015	0.20926
Q99K67	Alpha-aminoadipic semialdehyde synthase, mitochondrial;Lysine ketoglutarate reductase;Saccharopine dehydrogenase	Aass	2988700	5900800	3058300	7897600	6359500	3609000	42958000	2065100	6164200	4657800	5496800	3603100	5735700	6911400	5423600	10261000	2602100	182570000	4293700	163430000	3940000	7613400	12357000	4667200	11374000	7749700	5479300	4152400	162980000	10256000	13923000	3277600	7.69316e+06	3.75416e+07	0.204924	-2.28684	-2.98632	0.072451
K9J7B2	UDP-glucuronosyltransferase 1a6b	Ugt1a6b	3771500	8389900	10731000	6248500	10761000	499532	19868000	6858200	5576200	9216700	7350800	10296000	8543100	9959400	11382000	4262400	9442400	142330000	15103000	113240000	7267200	15452000	26949000	12889000	22230000	12651000	16364000	11774000	150390000	24270000	17696000	10556000	8.35714e+06	38037725	0.219707	-2.18635	-2.8498	0.00050822
Q9EQH3	Vacuolar protein sorting-associated protein 35	Vps35	6910600	5315300	2396200	2740200	2812500	2461100	5607200	1988000	930100	3681800	5291500	874350	1670100	2377300	2487800	4790600	5570400	56463000	5501000	57508000	3502700	4413400	4924200	6851300	6245200	4642000	8023800	814380	57528000	3185500	3713800	4695800	3.27092e+06	14598905	0.224052	-2.15809	-2.81141	0.0067652
Q3KQQ2	Major urinary protein 3	Mup3	54528000	142960000	149740000	140610000	204710000	127060000	155870000	244050000	206800000	124640000	201340000	191450000	198520000	134600000	298180000	166150000	772470000	368220000	530390000	312560000	1280700000	710240000	817650000	1156300000	846890000	571290000	797090000	1089200000	459350000	918100000	658080000	792550000	171325500	755067500	0.226901	-2.13987	-2.78665	1.72548e-12
Q9D8W7	OCIA domain-containing protein 2	Ociad2	9150900	31669000	25756000	13862000	23829000	25222000	20407000	19575000	12747000	11997000	27737000	22173000	23245000	15196000	17678000	17245000	127800000	80323000	118540000	83883000	79940000	88869000	81696000	79633000	64479000	81843000	79659000	79914000	69018000	80326000	104050000	85130000	1.98431e+07	8.65689e+07	0.229217	-2.12522	-2.76675	7.95095e-17
A2CEK7	Major urinary protein 14	Mup14	290600000	771610000	845300000	846890000	1939300000	502790000	1149500000	1670400000	927770000	826300000	935450000	1227900000	1208700000	800450000	1508100000	362690000	2412900000	1348200000	1820100000	1773000000	5153400000	3435300000	6455000000	7472300000	7935800000	1564300000	5198300000	10475000000	2761600000	2722000000	2859900000	4712400000	988359375	4256218750	0.232215	-2.10646	-2.74127	5.28669e-08
Q8R084	UDP-glucuronosyltransferase 2b1	Ugt2b1	9760000	16312000	25519000	18865000	23810000	12400000	46416000	15502000	24793000	22744000	21287000	20272000	23163000	24806000	30893000	15961000	26922000	219600000	33328000	219660000	37290000	47229000	103510000	36864000	105880000	50082000	54810000	50274000	320970000	73088000	70837000	55123000	2.20314e+07	9.40917e+07	0.234149	-2.0945	-2.72502	5.76682e-07
Q64435	UDP-glucuronosyltransferase 1-6	Ugt1a6	5717100	15860000	15766000	4630900	10218000	1270100	45352000	12015000	13032000	14429000	12103000	17842000	16587000	13810000	22622000	9090800	11914000	251110000	19543000	207460000	4092900	26864000	34714000	14082000	41505000	20512000	18978000	15625000	208780000	55862000	28591000	17970000	1.43966e+07	6.11002e+07	0.235622	-2.08545	-2.71273	0.00449358
Q64458	Cytochrome P450 2C29	Cyp2c29	12859000	25615000	25282000	39302000	27119000	17627000	110680000	20432000	27804000	28184000	36980000	19789000	23314000	23984000	24354000	21284000	30408000	533740000	33411000	435890000	29470000	60924000	71091000	33994000	78965000	23524000	29396000	23426000	451060000	59094000	81274000	36096000	3.02881e+07	1.25735e+08	0.240888	-2.05357	-2.66941	0.00309091
Q8JZZ0	UDP-glucuronosyltransferase 3A2	Ugt3a2	828170	5653700	9263500	12395000	12805000	5401600	46824000	3384400	9612300	11481000	8709900	8046300	11347000	9254700	9219000	1326200	3790400	180310000	5978000	149870000	580933	11826000	17900000	1069700	16356000	2174900	3319900	9042600	229660000	9306500	9097100	685910	1.0347e+07	4.06855e+07	0.254316	-1.9753	-2.56308	0.711327
A2ACG7	Dolichyl-diphosphooligosaccharide--protein glycosyltransferase subunit 2	Rpn2	1479500	7895500	10998000	13342000	14444000	4519600	29779000	4845800	5784700	4252500	6392000	7709700	10459000	6473600	8578600	7553600	8291300	156140000	7324600	146510000	580933	10915000	21897000	3861100	21412000	13190000	4813500	7867300	107940000	17124000	18095000	7076400	9.03169e+06	3.45649e+07	0.261297	-1.93624	-2.51001	0.108584
Q9ERK4	Exportin-2	Cse1l	1277800	2896400	5989400	7408700	14188000	15545000	21384000	17583000	18157000	11250000	17939000	3749300	16579000	3988500	14127000	4813200	17336000	157710000	15846000	127820000	5687600	4684800	12378000	19146000	13887000	4138700	4704500	15195000	196930000	3964700	9232600	19610000	1.10547e+07	3.92669e+07	0.281527	-1.82865	-2.36385	0.0946367
Q64459	Cytochrome P450 3A11	Cyp3a11	9221200	26205000	18659000	39466000	29647000	11444000	94684000	20529000	20510000	37291000	23547000	22725000	21823000	29704000	18765000	16928000	17438000	429460000	15220000	334460000	6069900	37898000	41955000	19363000	50144000	23965000	19251000	20606000	400520000	39572000	55317000	25541000	2.75718e+07	9.60487e+07	0.28706	-1.80058	-2.3257	0.0933756
P33267	Cytochrome P450 2F2	Cyp2f2	17330000	46104000	45497000	36070000	62948000	22539000	70576000	45347000	46985000	55830000	36586000	35530000	41272000	40614000	44970000	20797000	76039000	299220000	93266000	224190000	102410000	97687000	181180000	94271000	158520000	107050000	82572000	84783000	264430000	139870000	128870000	83905000	4.18122e+07	1.38641e+08	0.301585	-1.72936	-2.22896	2.16698e-09
Q9WVD5	Mitochondrial ornithine transporter 1	Slc25a15	6494800	11161000	9935200	13139000	11938000	8916300	42538000	7925500	10434000	13735000	10137000	9707000	9425300	10243000	8399700	15780000	5591700	182180000	5673200	190460000	580933	17009000	13621000	6209700	18007000	12256000	5832400	8733100	149250000	12854000	19369000	4855100	12494300	4.07801e+07	0.306382	-1.7066	-2.19803	0.573949
Q05421	Cytochrome P450 2E1	Cyp2e1	18269000	51077000	44718000	54059000	64266000	22111000	165470000	36124000	49607000	49087000	53307000	50742000	50798000	53390000	49475000	29899000	41668000	617160000	51664000	656170000	53639000	66580000	86195000	38217000	108120000	46398000	63054000	55900000	596740000	82096000	75219000	42877000	5.26499e+07	1.67606e+08	0.314129	-1.67057	-2.14909	0.0148106
Q3UW64	Bifunctional UDP-N-acetylglucosamine 2-epimerase/N-acetylmannosamine kinase;UDP-N-acetylglucosamine 2-epimerase (hydrolyzing);N-acetylmannosamine kinase	Gne	1102300	297850	3807800	2852600	4594800	2142100	7563300	2508600	3681900	3934900	2267200	2322100	2378700	3820500	4273500	1958900	1458900	47778000	1230200	17278000	1211700	4419900	4623100	2496200	8150400	3814000	2678600	2641800	43813000	5350000	4463900	3924500	3.09419e+06	9.70826e+06	0.318717	-1.64965	-2.12066	0.0604086
P00186	Cytochrome P450 1A2	Cyp1a2	5604800	9305800	14677000	18449000	16608000	5711700	51528000	12364000	18291000	11012000	13520000	10803000	16863000	14014000	16041000	7502100	9813700	137650000	6707600	110610000	18352000	19614000	40118000	16427000	37362000	10963000	23055000	18738000	226700000	30993000	30517000	16262000	15143400	4.71176e+07	0.321396	-1.63758	-2.10426	0.00731434
Q9EP75	Leukotriene-B4 omega-hydroxylase 3	Cyp4f14	2857400	4168300	5846700	5472600	5131600	5177000	13937000	3329300	5839400	4379900	4510900	6197200	5546000	5792100	8520700	4939600	2448700	69565000	3099500	57398000	580933	5302500	11922000	4429400	9492800	10165000	4658100	3877900	75162000	13001000	7738000	2621100	5.72786e+06	1.75914e+07	0.325606	-1.6188	-2.07875	0.267488
Q8VEM8	Phosphate carrier protein, mitochondrial	Slc25a3	14781000	16362000	18798000	24675000	18743000	11744000	61279000	14381000	16273000	19592000	14273000	9799200	15422000	18799000	17866000	23479000	12509000	246210000	21007000	204100000	13023000	20922000	31495000	14286000	36687000	23074000	13721000	17349000	245300000	32498000	29313000	9551400	1.97666e+07	6.06903e+07	0.325697	-1.6184	-2.07821	0.0564629
Q8VC30	Bifunctional ATP-dependent dihydroxyacetone kinase/FAD-AMP lyase (cyclizing);ATP-dependent dihydroxyacetone kinase;FAD-AMP lyase (cyclizing)	Dak	34654000	69947000	56043000	64076000	60088000	27634000	130850000	43996000	59514000	75709000	51021000	69366000	49218000	60160000	52025000	49196000	67930000	740210000	89074000	630450000	40811000	77211000	96749000	46446000	95562000	52412000	71848000	59227000	545340000	95286000	119250000	69053000	5.95936e+07	1.81054e+08	0.329149	-1.60319	-2.05754	0.00953112
Q99KK7	Dipeptidyl peptidase 3	Dpp3	82490	1470100	6818500	5695000	10267000	3019600	9075500	44778	6680300	10168000	1752500	5711500	6914400	7649800	6428400	7573400	342233	66348000	6305400	32774000	4806200	5678300	16858000	4860600	11272000	9576100	6865200	1865000	66980000	12965000	15344000	5861500	5.58445e+06	1.67938e+07	0.33253	-1.58844	-2.03751	0.0533829
Q63880	Carboxylesterase 3A	Ces3a	624830000	922320000	1072300000	768380000	2432400000	1324500000	1161600000	2071500000	1224400000	834900000	1336100000	1690400000	1756400000	1104000000	2654100000	1761200000	3520600000	1846700000	3836300000	2256200000	5814400000	3422900000	5806400000	5327900000	5378900000	4827100000	4892000000	5731200000	2925800000	5204400000	3727000000	3644600000	1421208125	4260150000	0.333605	-1.58379	-2.03118	8.16e-10
P51881	ADP/ATP translocase 2;ADP/ATP translocase 2, N-terminally processed	Slc25a5	44634000	101410000	72623000	101800000	95336000	55235000	355100000	56579000	82123000	89548000	82355000	58651000	87882000	88003000	91550000	74352000	55174000	1302200000	70309000	1060900000	49122000	106070000	133740000	63703000	156780000	75857000	64866000	71123000	1060400000	123440000	137900000	63772000	9.60738e+07	287209750	0.334507	-1.57989	-2.02589	0.10421
O35488	Very long-chain acyl-CoA synthetase	Slc27a2	8145800	22304000	21098000	21267000	27678000	11927000	60158000	11200000	16322000	19681000	19080000	18151000	17902000	19634000	21378000	14020000	10794000	277310000	16770000	272630000	8133400	23032000	32312000	12176000	32888000	18897000	16844000	13036000	183250000	28671000	25065000	12772000	2.06216e+07	61536275	0.335113	-1.57728	-2.02234	0.144083
P24456	Cytochrome P450 2D10	Cyp2d10	37087000	48827000	61118000	61662000	78013000	38865000	146480000	50554000	54756000	63282000	51284000	63539000	62406000	58839000	67996000	52688000	69686000	586680000	70304000	478760000	95782000	102020000	158070000	54779000	140830000	92464000	82245000	64083000	539520000	185250000	120070000	70086000	62337250	1.81914e+08	0.342674	-1.54509	-1.97862	0.000469999
A0A0R4J293	Protein-glutamine gamma-glutamyltransferase K	Tgm1	64887000	56014000	76146000	80981000	98534000	68467000	68724000	87488000	75603000	81487000	95837000	92162000	82917000	65048000	86863000	92055000	24443000	20419000	25010000	18370000	38733000	29112000	34377000	33884000	45740000	32886000	26234000	43987000	24610000	38766000	34827000	26538000	7.95758e+07	31121000	2.55698	1.35444	1.96057	8.2646e-14
Q8K3M1	Cis-retinol/3alpha hydroxysterol short-chain dehydrogenase-like protein	Rdh16f2	29799000	22101000	26430000	36436000	33896000	18032000	47789000	22979000	25927000	33979000	22817000	35388000	31523000	25853000	27416000	20300000	10798000	19084000	9455200	19193000	580933	11433000	7514300	478808	466503	19396000	11630000	6496000	20782000	21965000	14509000	448316	2.87916e+07	1.08894e+07	2.644	1.40272	2.02617	0.000189122
D3Z6A1	Dynactin subunit 6	Dctn6	8056500	10217000	9977000	9532800	10872000	9474200	10118000	9687900	7342700	9790700	8887600	10550000	8337500	7565000	8559400	12631000	342233	5741200	312879	7370700	580933	11036000	323890	13531000	466503	344674	8862400	415610	620123	330431	6292800	448316	9.47496e+06	3.56373e+06	2.65872	1.41073	2.03704	6.51335e-06
A0A1Y7VK19	Iron-sulfur cluster assembly 2 homolog, mitochondrial	Isca2	27362000	29888000	23273000	26752000	27340000	30336000	23633000	23401000	27269000	22351000	27628000	29699000	22917000	25316000	34770000	36774000	30239000	747486	312879	746728	580933	26091000	20928000	26543000	466503	344674	28373000	415610	620123	330431	26453000	448316	2.74193e+07	1.02275e+07	2.68093	1.42273	2.05335	1.10806e-05
D3YVA2	Neurocalcin-delta	Ncald	16544000	17886000	21150000	22758000	21419000	21862000	19070000	20236000	18710000	17621000	21952000	20412000	13380000	14258000	25320000	25021000	12126000	3828700	11544000	746728	14325000	10383000	323890	9376400	466503	10106000	7740200	415610	620123	14122000	10042000	11216000	1.98499e+07	7.33638e+06	2.70568	1.43599	2.07136	8.33917e-05
Q99P72-1	Reticulon-4	Rtn4	32937000	38509000	32456000	41082000	22729000	19671000	29211000	26905000	32578000	39605000	31705000	25785000	26329000	35046000	28991000	24632000	10710000	19911000	19642000	15373000	8195000	5892200	13386000	478808	12365000	8756300	8046600	4080300	14479000	14131000	9881800	7350200	3.05107e+07	1.07924e+07	2.82706	1.4993	2.15737	3.03737e-06
O35955	Proteasome subunit beta type-10	Psmb10	877520000	633590000	514080000	608350000	466460000	648460000	418110000	743500000	452380000	622950000	885560000	509190000	444300000	771440000	579870000	1377400000	192790000	115680000	341740000	68555000	34875000	309410000	329790000	297740000	316810000	299980000	413460000	307090000	144400000	166690000	116380000	215320000	659572500	229419375	2.87496	1.52354	2.19031	2.67966e-07
A0A075B5M7	Immunoglobulin kappa variable 5-39	Igkv5-39	153510000	9268200	21478000	63407000	73603000	87835000	20574000	84462000	99640000	24288000	485800000	23583000	5412300	7162600	22004000	38904000	43447000	20956000	56523000	27385000	32656000	55528000	14829000	35959000	16836000	32498000	13108000	41104000	2682400	11827000	6793700	7933000	7.63082e+07	2.62541e+07	2.90653	1.5393	2.21171	0.0785279
A0A075B5V6	Ig heavy chain V region AC38 205.12;Ig heavy chain V region J558;Ig heavy chain V region MOPC 104E	Ighv1-42	126630000	31695000	406160000	90887000	23846000	111810000	22350000	14982000	23702000	35295000	64138000	51957000	35169000	11656000	9970200	18484000	28128000	5517200	19016000	4236000	6346000	22775000	11007000	12178000	35617000	60226000	73196000	43037000	5936700	5306400	22129000	4563200	67420700	2.24509e+07	3.00303	1.58642	2.27572	0.00657716
Q91Z98	Chitinase-like protein 4	Chil4	34391000	758090000	51002000	302840000	31603000	31016000	11215000	19210000	80731000	112780000	11573000	92065000	25985000	11033000	29285000	36002000	43329000	10362000	50826000	32358000	26431000	385656	19076000	13270000	96291000	51886000	66711000	71540000	620123	19370000	325998	448316	1.02426e+08	3.14519e+07	3.2566	1.70337	2.43461	0.0221933
D3Z5G7	Carboxylic ester hydrolase	Ces1b	8224300	8122800	6325100	7785000	4701700	11059000	14147000	12046000	6363300	7076000	11655000	8740100	10735000	7745200	10145000	13462000	7082800	5737200	312879	746728	580933	385656	5550800	6852800	466503	7809800	6197100	415610	620123	330431	325998	448316	9.27078e+06	2.74148e+06	3.38167	1.75774	2.50847	1.37401e-06
Q06770	Corticosteroid-binding globulin	Serpina6	48206000	38219000	52139000	63064000	17007000	41507000	31180000	25385000	38640000	53677000	30386000	40016000	30582000	24610000	21339000	30288000	23928000	9623600	21094000	8826100	2625500	21709000	323890	10034000	7452600	20126000	8477700	4049300	8712300	9258200	325998	1852400	3.66403e+07	9.90116e+06	3.70061	1.88776	2.68512	8.24952e-06
E9Q7C8	Cytochrome P450 2C40	Cyp2c40	74768000	66853000	59393000	93419000	111520000	57244000	107860000	82061000	84083000	102790000	57535000	68949000	72407000	82209000	104830000	85346000	16709000	49463000	20701000	39191000	13347000	15127000	22814000	8048600	17080000	14806000	17896000	16405000	46308000	22956000	19998000	10197000	8.19542e+07	2.19404e+07	3.73531	1.90123	2.70341	4.11138e-12
A0A075B5P5	Ig gamma-3 chain C region	Ighg3	55647000	1075600000	309070000	30604000	51172000	77849000	30965000	17868000	208920000	361050000	42590000	353730000	9230100	39370000	11118000	43724000	52588000	9868800	25102000	43551000	14687000	6514300	16133000	8290700	25953000	194870000	39713000	60777000	7369300	15511000	22297000	448316	1.69907e+08	3.39796e+07	5.00026	2.322	3.27506	0.00595276
A0A140T8N5	Immunoglobulin kappa variable 6-23 (Fragment)	Igkv6-23	254040000	5217500	11072000	5800600	5902300	10135000	4166300	2962200	5303000	5705500	5657400	5575500	4754800	4242200	2847700	4786100	4787600	3263000	4525100	746728	2719200	7422400	3107400	3290600	4152500	4697800	6023900	5699500	2173100	2848900	3617900	3210500	2.11355e+07	3.89288e+06	5.42927	2.44076	3.4364	0.0270592
A0A075B5P3	Ig gamma-2B chain C region	Ighg2b	695080000	151190000	751300000	1771100000	387540000	784680000	175130000	231390000	133080000	254840000	150060000	239910000	63777000	66206000	283640000	95527000	67892000	35841000	84282000	30451000	16686000	66572000	19864000	16052000	108110000	211650000	70911000	185750000	19122000	35322000	31308000	16520000	389653125	6.35208e+07	6.13426	2.61689	3.67568	2.96813e-06
Q9QYR7	Acyl-coenzyme A thioesterase 3	Acot3	115910000	151580000	105430000	153990000	64364000	45387000	80102000	69755000	115450000	155100000	74482000	112410000	70628000	114570000	55054000	49090000	32031000	30804000	47759000	29718000	1087300	12231000	2740100	5502200	466503	1086700	23088000	924230	15722000	8004200	16809000	12672000	95831375	1.50403e+07	6.37163	2.67166	3.75009	1.42479e-07
P27786	Steroid 17-alpha-hydroxylase/17,20 lyase	Cyp17a1	7774100	9566000	6208100	16373000	4507300	3709700	19400000	5675000	6197100	18906000	4122600	5027600	4820900	6541800	3527400	4979200	342233	747486	312879	4278900	580933	385656	323890	478808	466503	1830400	451250	415610	5073300	330431	325998	448316	7.95849e+06	1.04954e+06	7.58285	2.92274	4.0912	1.0526e-10
Q9D154	Leukocyte elastase inhibitor A	Serpinb1a	15536000	60025000	51033000	63420000	5942700	3587500	12506000	21470000	56024000	82707000	21282000	30006000	13200000	25990000	9205600	2143400	2448600	6792800	11322000	5963700	580933	1534600	1274600	478808	466503	344674	451250	415610	2630100	2431100	325998	448316	2.96299e+07	2.36935e+06	12.5055	3.64449	5.07174	3.10471e-08
Q9NYQ2	Hydroxyacid oxidase 2	Hao2	151960000	132220000	108610000	111520000	18879000	78127000	19181000	25077000	73089000	87794000	32181000	79334000	26496000	51916000	8106300	109290000	2053700	2678100	3292100	978980	816790	5595000	3474800	478808	466503	344674	451250	415610	620123	330431	325998	448316	6.96113e+07	1.4232e+06	48.9118	5.61211	7.74486	2.00269e-14
