# Supplementary material for: Integrated liver and serum proteomics uncover sexual dimorphism and alteration of several immune response proteins in an aging Werner syndrome mouse model
Source: Aging (Albany NY). 2024 May 24;16(10):8417–45. doi: 10.18632/aging.205866 (PMC11164518; doi:10.18632/aging.205866)
Supplement: Supplementary Table 4 [file aging-16-205866-s005.xls]

## Sheet: Column headers
Supplementary Table 4. List of quantified liver proteins significantly different in at least one of the comparisons between the various female groups.
Column header	Description
Accession	UniProt accession number of the leading razor protein
Protein.names	Protein name
Gene.names	Gene name
Razor...unique.peptides	Number of unique and razor peptides
FWrn10m_2868	LFQ intensities, normalized and imputed.
FWrn10m_2869
FWrn10m_2870
FWrn10m_2871
FWrn4m_3065
FWrn4m_3066
FWrn4m_3082
FWrn4m_3083
FWT10m_2854
FWT10m_2856
FWT10m_2882
FWT10m_2883
FWT4m_3002
FWT4m_3003
FWT4m_3021
FWT4m_3022
mean_g1	Mean of intensities for group g1
mean_g2	Mean of intensities for group g2
Ratio_g1g2	Ratio is computed as mean of group g1 / mean of group g2
log2Ratio	Log2 of the ratio between group g1 and group g2
Foldchange	The fold change is computed as ratio when ratio >0 or 1/ratio when ratio <0
Log2Foldchange	Log2 of the fold change between group g1 and group g2
zscore	zscore = x - µ / σ, where x = log2(ratio), µ = average of all log2(ratio) et σ = standard deviation of all log2(ratio)
pval_Limma	p-value from Limma

## Sheet: Quantified proteins in females
Accession	ProteinNames	GeneNames	RazorUniquePeptides	FWrn10m_2868	FWrn10m_2869	FWrn10m_2870	FWrn10m_2871	FWrn4m_3065	FWrn4m_3066	FWrn4m_3082	FWrn4m_3083	FWT10m_2854	FWT10m_2856	FWT10m_2882	FWT10m_2883	FWT4m_3002	FWT4m_3003	FWT4m_3021	FWT4m_3022
Q8C196	Carbamoyl-phosphate synthase [ammonia], mitochondrial	Cps1	80	464040000	477000000	638660000	933390000	742500000	566610000	2526500000	630820000	713130000	689090000	658400000	511800000	670550000	751320000	787190000	897020000
P19096	Fatty acid synthase;[Acyl-carrier-protein] S-acetyltransferase;[Acyl-carrier-protein] S-malonyltransferase;3-oxoacyl-[acyl-carrier-protein] synthase;3-oxoacyl-[acyl-carrier-protein] reductase;3-hydroxyacyl-[acyl-carrier-protein] dehydratase;Enoyl-[acyl-carrier-protein] reductase;Oleoyl-[acyl-carrier-protein] hydrolase	Fasn	75	17518000	39111000	30289000	50367000	17520000	8783300	116620000	14895000	37181000	80048000	25863000	21889000	30360000	42349000	24992000	16284000
F8VPN4	Glycogen debranching enzyme	Agl	72	308720000	161660000	143900000	190520000	144120000	275410000	95640000	233970000	137360000	242050000	97451000	141130000	254690000	355310000	135990000	95728000
P16546-2	Spectrin alpha chain, non-erythrocytic 1	Sptan1	72	70338000	71468000	69230000	63820000	68761000	67574000	68441000	63960000	65558000	68290000	52995000	74507000	75727000	66984000	69178000	62472000
Q8R0Y6	Cytosolic 10-formyltetrahydrofolate dehydrogenase	Aldh1l1	65	3954000000	3080700000	2419700000	3099200000	1994800000	2215700000	2468800000	2542000000	3068000000	3111700000	2431500000	2229900000	2563900000	2633700000	2181100000	2573700000
G3X982	Aldehyde oxidase 3	Aox3	52	257170000	362710000	291950000	250620000	322920000	240230000	265620000	359360000	302850000	225770000	318610000	287070000	295930000	263880000	356780000	298210000
Q60597	2-oxoglutarate dehydrogenase, mitochondrial	Ogdh	49	203790000	198490000	183380000	171490000	198300000	240890000	181390000	204040000	178500000	169150000	186170000	193720000	199440000	206570000	191540000	256280000
Q9DBT9	Dimethylglycine dehydrogenase, mitochondrial	Dmgdh	48	358180000	355480000	583900000	627210000	506100000	404030000	568220000	438140000	690170000	661090000	609640000	588110000	640390000	635530000	624710000	499300000
P01027	Complement C3;Complement C3 beta chain;C3-beta-c;Complement C3 alpha chain;C3a anaphylatoxin;Acylation stimulating protein;Complement C3b alpha chain;Complement C3c alpha chain fragment 1;Complement C3dg fragment;Complement C3g fragment;Complement C3d fragment;Complement C3f fragment;Complement C3c alpha chain fragment 2	C3	47	45367000	49702000	55745000	60648000	66105000	65517000	65094000	53792000	55620000	69822000	53881000	68510000	60243000	55597000	66340000	64506000
Q8CHR6	Dihydropyrimidine dehydrogenase [NADP(+)]	Dpyd	45	438210000	386280000	278710000	295840000	200930000	230610000	203730000	287630000	303360000	273070000	311380000	257030000	251920000	237660000	220080000	272220000
Q99LB7	Sarcosine dehydrogenase, mitochondrial	Sardh	44	472320000	382800000	560960000	568030000	512020000	385180000	599570000	497590000	642350000	626920000	404890000	482190000	521150000	554710000	474480000	338530000
Q9ET01	Glycogen phosphorylase, liver form;Alpha-1,4 glucan phosphorylase	Pygl	44	451630000	574380000	476720000	702780000	455970000	416680000	383430000	477840000	600310000	878000000	484130000	528510000	728060000	893330000	494080000	324890000
P28271	Cytoplasmic aconitate hydratase	Aco1	43	406730000	424180000	447810000	443690000	449930000	345030000	402760000	339400000	427620000	468510000	366610000	372300000	412890000	409430000	435320000	336170000
Q8BHN3-2	Neutral alpha-glucosidase AB	Ganab	43	393620000	336880000	343670000	334220000	359370000	377200000	306640000	375360000	318480000	305460000	363220000	326230000	306540000	304640000	353300000	349150000
Q9R0H0	Peroxisomal acyl-coenzyme A oxidase 1	Acox1	43	1103900000	1341200000	1358700000	1478600000	1405300000	1125000000	1285000000	1497200000	1529600000	1616500000	1330100000	1588800000	1398900000	1504900000	1232900000	977350000
P40142	Transketolase	Tkt	42	1380400000	1817100000	1432400000	1528800000	1440300000	1355400000	1218900000	1519800000	1523100000	1457400000	1563300000	1554200000	1624800000	1726900000	1548700000	1612200000
P58252	Elongation factor 2	Eef2	42	264640000	305890000	365590000	330560000	390320000	311830000	357640000	351260000	372330000	328020000	330050000	392200000	363230000	341370000	395510000	386720000
O08601	Microsomal triglyceride transfer protein large subunit	Mttp	41	661590000	762330000	706400000	778230000	753030000	704550000	639590000	829730000	725310000	780680000	793270000	762620000	709820000	771970000	746950000	622560000
P07724	Serum albumin	Alb	41	10863000000	6771200000	6677200000	6896000000	6982800000	11826000000	6934300000	7600000000	6210100000	5974200000	7358600000	7796400000	7570600000	6335400000	5524100000	10903000000
Q01853	Transitional endoplasmic reticulum ATPase	Vcp	41	547910000	580150000	530810000	494290000	569950000	509370000	495790000	562760000	521080000	530170000	545220000	551670000	510570000	509690000	527240000	536400000
G3X8P9	Aldehyde oxidase 1	Aox1	40	42824000	71042000	51958000	48576000	49346000	35844000	49111000	55284000	58156000	51676000	62153000	56238000	52409000	47730000	52518000	47134000
A0A1L1SV25	Alpha-actinin-4	Actn4	39	141040000	164860000	135800000	144440000	125570000	147100000	141590000	146150000	147840000	150660000	142660000	183420000	138090000	138030000	156000000	137390000
Q00519	Xanthine dehydrogenase/oxidase;Xanthine dehydrogenase;Xanthine oxidase	Xdh	39	332290000	258250000	236550000	276400000	237430000	247550000	222790000	293170000	255950000	239290000	265600000	216910000	249070000	252890000	249770000	297280000
Q91W43	Glycine dehydrogenase (decarboxylating), mitochondrial	Gldc	39	160770000	123720000	135930000	112590000	134000000	160560000	136090000	137830000	113010000	104670000	122350000	141400000	130530000	141970000	128840000	192540000
Q921I1	Serotransferrin	Tf	39	1015400000	894220000	866850000	847750000	783080000	936960000	795310000	828810000	808200000	821880000	972750000	872910000	647990000	654130000	745760000	827340000
P26043	Radixin	Rdx	37	720810000	667650000	625070000	637450000	614730000	707840000	565240000	640890000	641070000	610210000	692570000	603150000	615590000	642210000	590050000	686100000
Q78PY7	Staphylococcal nuclease domain-containing protein 1	Snd1	37	68819000	86985000	117640000	103780000	122380000	80980000	109490000	107990000	119460000	106910000	87071000	120830000	121610000	117080000	143380000	88874000
Q91XD4	Formimidoyltransferase-cyclodeaminase;Glutamate formimidoyltransferase;Formimidoyltetrahydrofolate cyclodeaminase	Ftcd	37	1321300000	1060200000	824160000	997000000	828130000	975110000	713150000	1001800000	928460000	927690000	780370000	793320000	835760000	767460000	843270000	1130400000
A2AVJ7	Ribosome-binding protein 1	Rrbp1	36	80422000	91921000	93511000	81558000	116730000	94942000	91705000	82168000	67699000	75905000	96434000	93751000	91865000	85798000	100160000	94566000
G5E8R3	Pyruvate carboxylase;Pyruvate carboxylase, mitochondrial	Pcx;Pc	36	25415000	59524000	57189000	54439000	65940000	33723000	156080000	46952000	66058000	53145000	43796000	53721000	53881000	51548000	64927000	58326000
P14824	Annexin A6;Annexin	Anxa6	36	361430000	398510000	437600000	421440000	405270000	367780000	331200000	448560000	406430000	334590000	371340000	415230000	296910000	239740000	383930000	339250000
P24270	Catalase	Cat	35	9466500000	8975900000	7487200000	8086800000	7413800000	7814800000	7111100000	7961600000	8282600000	7568900000	8573500000	7982600000	7272400000	8184400000	7412400000	7625000000
Q91V92	ATP-citrate synthase	Acly	35	116000000	73194000	45256000	66179000	29974000	37446000	72501000	27081000	58794000	114710000	35368000	39808000	63321000	69957000	41082000	48727000
Q99KI0	Aconitate hydratase, mitochondrial	Aco2	35	327090000	336820000	389180000	388340000	396440000	356250000	374130000	377230000	415490000	408650000	351040000	389080000	433290000	449290000	412500000	322770000
A2AQR0	Glycerol-3-phosphate dehydrogenase;Glycerol-3-phosphate dehydrogenase, mitochondrial	Gpd2	34	70346000	161090000	148890000	117300000	120600000	83974000	122790000	132250000	123990000	156200000	123450000	149140000	131920000	138090000	123320000	79856000
O35945	Aldehyde dehydrogenase, cytosolic 1	Aldh1a7	34	3131300000	4973400000	3536000000	3774500000	2742600000	1897200000	2812800000	3085800000	3692500000	3962200000	3672700000	2798800000	3206000000	2958100000	2747000000	1978600000
P20029	78 kDa glucose-regulated protein	Hspa5	34	1973900000	1806800000	1841600000	1709100000	2282600000	2513500000	1609100000	2061700000	1826200000	1519100000	1924200000	1915900000	1930100000	1707200000	2143600000	2214800000
P50247	Adenosylhomocysteinase	Ahcy	34	6144000000	4639900000	4410800000	5280700000	5135700000	5345400000	4719300000	6333000000	5797900000	5355200000	5560400000	4923100000	5430700000	5359300000	5416700000	5368000000
P63038	60 kDa heat shock protein, mitochondrial	Hspd1	34	400810000	418990000	573450000	516930000	499640000	495430000	664840000	553130000	554400000	559400000	420990000	556560000	521210000	497050000	589940000	585800000
Q64727	Vinculin	Vcl	34	119030000	97075000	90117000	87220000	92252000	97194000	86459000	68417000	84919000	93410000	103130000	90547000	92022000	105040000	85533000	85505000
Q8VCT4	Carboxylesterase 1D	Ces1d	34	3586800000	4938800000	4769200000	4955100000	4416900000	4161900000	4026000000	4504300000	4502700000	4013300000	4530900000	5043300000	4582000000	4221700000	4212700000	4195500000
E9Q509	Pyruvate kinase;Pyruvate kinase PKLR	Pklr	33	828540000	1558500000	1075500000	1159100000	789540000	501660000	751460000	1020600000	1237600000	1528700000	977780000	1043000000	1070000000	1198500000	921390000	676410000
P08113	Endoplasmin	Hsp90b1	33	112490000	113030000	238760000	175530000	197340000	138900000	245000000	165610000	187830000	195810000	138810000	193090000	156390000	160470000	217830000	128530000
P17563	Selenium-binding protein 1	Selenbp1	33	3301700000	3023500000	2611500000	3450900000	2558200000	3109600000	2431500000	3285900000	3220200000	2983900000	2976600000	2716100000	2874000000	3029600000	2870500000	3305800000
P27773	Protein disulfide-isomerase A3	Pdia3	33	767320000	617940000	597820000	602740000	680250000	704830000	512020000	711900000	596820000	517970000	565710000	616510000	587990000	563320000	801180000	667640000
P51660	Peroxisomal multifunctional enzyme type 2;(3R)-hydroxyacyl-CoA dehydrogenase;Enoyl-CoA hydratase 2	Hsd17b4	33	238490000	393590000	414630000	293370000	374740000	246400000	351730000	325340000	376230000	349010000	305710000	366710000	294510000	310150000	342560000	231940000
Q8BMS1	Trifunctional enzyme subunit alpha, mitochondrial;Long-chain enoyl-CoA hydratase;Long chain 3-hydroxyacyl-CoA dehydrogenase	Hadha	33	270550000	344340000	353480000	312180000	423010000	325010000	400070000	283520000	352070000	424060000	320950000	405410000	400260000	431320000	380420000	302600000
Q91VD9	NADH-ubiquinone oxidoreductase 75 kDa subunit, mitochondrial	Ndufs1	33	73906000	122870000	176140000	176000000	146470000	165350000	110100000	150760000	136980000	170550000	107880000	194820000	171520000	118660000	168230000	127930000
Q9D0F9	Phosphoglucomutase-1	Pgm1;Pgm2	33	1416500000	1341900000	1120700000	1250700000	1067500000	1301800000	1004500000	1239700000	1303700000	1097500000	1295700000	1132900000	1144700000	1213800000	1067100000	1257000000
P05202	Aspartate aminotransferase, mitochondrial	Got2	32	5651500000	5448700000	5066300000	5333500000	5300100000	6933300000	4924500000	5819000000	5826400000	4872200000	6033200000	5456500000	5455600000	5785200000	5503700000	6489100000
P09411	Phosphoglycerate kinase 1;Phosphoglycerate kinase	Pgk1	32	2798000000	2630200000	2002000000	2326000000	2115200000	2511800000	1825000000	2464000000	2363600000	2149800000	2222100000	1987000000	2049700000	2296500000	2217300000	2564200000
P26443	Glutamate dehydrogenase 1, mitochondrial	Glud1	32	938730000	1569000000	1255100000	957250000	1115400000	721310000	1208400000	1210100000	1179800000	1336500000	1031900000	1199800000	1061900000	1030500000	1204500000	786690000
P52825	Carnitine O-palmitoyltransferase 2, mitochondrial	Cpt2	32	532820000	740690000	522660000	483210000	546970000	526390000	495300000	555180000	548000000	502420000	477540000	587960000	550070000	561710000	504580000	470780000
P80314	T-complex protein 1 subunit beta	Cct2	32	111200000	134790000	194900000	173040000	185760000	140440000	176030000	192800000	174210000	182950000	138320000	193360000	171730000	149470000	193280000	136450000
Q3ULD5	Methylcrotonoyl-CoA carboxylase beta chain, mitochondrial	Mccc2	32	356050000	315380000	269900000	300490000	264850000	329880000	248690000	308510000	291420000	270870000	296610000	287810000	276990000	279460000	259420000	340880000
Q61838	Alpha-2-macroglobulin;Alpha-2-macroglobulin 165 kDa subunit;Alpha-2-macroglobulin 35 kDa subunit	A2m	32	122900000	97447000	122990000	90314000	113150000	112910000	111190000	76323000	86434000	125130000	73557000	96978000	96845000	77260000	81513000	87061000
A0A0R4J0I9	Prolow-density lipoprotein receptor-related protein 1;Low-density lipoprotein receptor-related protein 1 85 kDa subunit;Low-density lipoprotein receptor-related protein 1 515 kDa subunit;Low-density lipoprotein receptor-related protein 1 intracellular domain	Lrp1	31	13318000	19602000	32735000	24662000	35635000	24985000	29319000	25053000	24643000	29215000	28198000	23949000	22948000	26023000	29596000	20507000
A0A0R4J0Z1	Protein disulfide-isomerase A4	Pdia4	31	304970000	236010000	251740000	226320000	262890000	222140000	218720000	234650000	243300000	226500000	200110000	241410000	209880000	210170000	274920000	175370000
D3YZ54	2-hydroxyacyl-CoA lyase 1	Hacl1	31	1288600000	1329200000	1108700000	1373000000	1166200000	995680000	960780000	1269100000	1236600000	1315000000	1225300000	1260800000	1095500000	1117200000	1133100000	1273600000
P06801	NADP-dependent malic enzyme;Malic enzyme	Me1	31	471810000	976580000	441630000	610310000	308080000	200130000	375720000	332930000	588510000	1087300000	425250000	439810000	694620000	838350000	440660000	292080000
P34914	Bifunctional epoxide hydrolase 2;Cytosolic epoxide hydrolase 2;Lipid-phosphate phosphatase	Ephx2	31	543200000	655270000	550310000	568550000	516370000	323740000	481620000	500810000	558480000	611380000	355760000	520870000	478980000	489170000	442840000	236110000
P50431	Serine hydroxymethyltransferase, cytosolic;Serine hydroxymethyltransferase	Shmt1	31	1108900000	1035700000	1127800000	1325200000	1083200000	1086200000	1024200000	1389800000	1268400000	1326000000	1240600000	1210300000	1134600000	1170600000	1126300000	1126300000
Q3U2G2	Heat shock 70 kDa protein 4	Hspa4	31	162090000	145740000	167170000	187860000	171010000	175680000	161450000	200910000	179600000	170430000	176460000	172980000	180370000	174370000	178890000	165960000
Q61233	Plastin-2	Lcp1	31	318270000	199250000	218130000	219850000	211850000	191560000	188090000	190910000	207500000	238790000	184960000	213080000	220450000	225240000	218530000	197550000
Q99J08	SEC14-like protein 2	Sec14l2	31	845780000	908800000	646690000	701930000	713730000	552460000	598030000	765400000	746610000	674720000	595980000	677800000	684610000	644930000	685350000	550110000
Q9CPY7	Cytosol aminopeptidase	Lap3	31	1058700000	927480000	804010000	990060000	863240000	1118100000	812560000	1015100000	1027700000	838750000	1081800000	897640000	900210000	904500000	955910000	1198700000
P09103	Protein disulfide-isomerase	P4hb	30	2413500000	2383500000	2112800000	2029800000	1975500000	1740800000	1683300000	2216900000	2066200000	1996000000	1669000000	1918800000	1710400000	1798000000	1990300000	1448400000
P16332	Methylmalonyl-CoA mutase, mitochondrial	Mut	30	246470000	199750000	185930000	203600000	176150000	198700000	177610000	213150000	224550000	182180000	175620000	206730000	194240000	218740000	211000000	286840000
P28665	Murinoglobulin-1	Mug1	30	21130000	20570000	39187000	21179000	57028000	29229000	41435000	35958000	29301000	19839000	30494000	33322000	37901000	33235000	44663000	24609000
P54071	Isocitrate dehydrogenase [NADP], mitochondrial	Idh2	30	1334800000	1019900000	939000000	1152200000	1040400000	1416500000	924540000	1099500000	1093100000	895240000	1192300000	1046600000	1038900000	1086900000	948750000	1363100000
P63017	Heat shock cognate 71 kDa protein	Hspa8	30	1481500000	1531200000	1378900000	1468500000	1541600000	1635700000	1508500000	1703100000	1527500000	1438400000	1619900000	1496700000	1410400000	1450600000	1547100000	1540400000
Q8K010	5-oxoprolinase	Oplah	30	30669000	37103000	39777000	30792000	37797000	25990000	33978000	37234000	35227000	41257000	24535000	37255000	37662000	33607000	32784000	27335000
Q8K2B3	Succinate dehydrogenase [ubiquinone] flavoprotein subunit, mitochondrial	Sdha	30	836950000	787500000	773720000	782150000	859580000	976580000	795640000	844290000	893390000	767970000	883790000	809710000	891780000	867470000	805630000	941940000
Q9CZN7-2	Serine hydroxymethyltransferase	Shmt2	30	326250000	300190000	339170000	390270000	369800000	421970000	368040000	456140000	415660000	366690000	435910000	404070000	395540000	420060000	413240000	384410000
Q9EQ20	Methylmalonate-semialdehyde dehydrogenase [acylating], mitochondrial	Aldh6a1	30	1331100000	1419900000	1648400000	1975900000	1651500000	1852600000	1576200000	2049100000	1975200000	1699100000	1655100000	1786500000	1885200000	1793200000	1826700000	2073600000
Q9Z2V4	Phosphoenolpyruvate carboxykinase, cytosolic [GTP]	Pck1	30	126390000	118270000	68296000	74883000	122490000	167400000	103470000	104630000	84232000	110580000	160170000	138760000	158840000	169990000	131510000	184610000
F6RPJ9	Insulin-degrading enzyme	Ide	29	76670000	70869000	68386000	72916000	72249000	75820000	71100000	84981000	75603000	71408000	84000000	70086000	76349000	74946000	77296000	82733000
O35490	Betaine--homocysteine S-methyltransferase 1	Bhmt	29	15358000000	14001000000	10167000000	13118000000	9578600000	9553700000	11589000000	14250000000	13223000000	13376000000	13566000000	8758200000	12031000000	12034000000	9593100000	8285700000
P42932	T-complex protein 1 subunit theta	Cct8	29	163530000	176670000	235310000	217220000	233370000	205320000	209130000	230750000	224030000	223900000	216490000	235120000	211170000	197020000	216750000	186510000
P47738	Aldehyde dehydrogenase, mitochondrial	Aldh2	29	2830700000	2834600000	2613200000	2757900000	2414300000	1874300000	2584000000	2686500000	2770100000	3450000000	1958700000	2713500000	2727200000	2736900000	2604900000	2498200000
P49429	4-hydroxyphenylpyruvate dioxygenase	Hpd	29	3816600000	2708000000	3039400000	3365900000	2723200000	3142600000	3258600000	3204700000	3518900000	3199800000	3120600000	2588900000	3067000000	2942300000	2654400000	2613800000
P61922	4-aminobutyrate aminotransferase, mitochondrial	Abat	29	291120000	263860000	284640000	306100000	258450000	199420000	266080000	226700000	348960000	399390000	227760000	286610000	266980000	298910000	275510000	224420000
Q80X90	Filamin-B	Flnb	29	17734000	21226000	24494000	21035000	18429000	16894000	22992000	17901000	16657000	25099000	16957000	19000000	21832000	20612000	19015000	15667000
Q91YI0	Argininosuccinate lyase	Asl	29	1546200000	866180000	940420000	1172600000	1370300000	1856200000	1221900000	1800900000	1461000000	1488800000	1154400000	1122800000	1286800000	1362200000	1353800000	1279200000
Q9CWJ9	Bifunctional purine biosynthesis protein PURH;Phosphoribosylaminoimidazolecarboxamide formyltransferase;IMP cyclohydrolase	Atic	29	111020000	88219000	101300000	120230000	96144000	128120000	92846000	111000000	121460000	106420000	112880000	102140000	114790000	118670000	107810000	117010000
Q9QUR6	Prolyl endopeptidase	Prep	29	92425000	97582000	89687000	92008000	102040000	95705000	80674000	103630000	101480000	79193000	112260000	96582000	101990000	98862000	105630000	115600000
P37040	NADPH--cytochrome P450 reductase	Por	28	214590000	181680000	149710000	146390000	173990000	115250000	187320000	100510000	144390000	168000000	156580000	152490000	173570000	174480000	172710000	105890000
P38647	Stress-70 protein, mitochondrial	Hspa9	28	1090600000	1001700000	811850000	956740000	884700000	1277700000	868410000	951730000	935110000	873590000	993270000	966680000	1020100000	1009900000	1022000000	1467800000
P56480	ATP synthase subunit beta, mitochondrial	Atp5b	28	2622000000	3630000000	4101200000	4655900000	4551900000	4452000000	4412900000	5614600000	4582400000	3895100000	4298800000	4497500000	4912100000	4215400000	4893600000	5526500000
Q03265	ATP synthase subunit alpha, mitochondrial;ATP synthase subunit alpha	Atp5a1	28	508140000	822120000	880530000	823320000	925820000	619240000	1532000000	722900000	812510000	967120000	622990000	769200000	842440000	829950000	836950000	655600000
Q3UEL5	Urocanate hydratase	Uroc1	28	694000000	616980000	750050000	734350000	670250000	598030000	650190000	605550000	818270000	922940000	562850000	653160000	662070000	698660000	610160000	581380000
Q8BL66	Early endosome antigen 1	Eea1	28	25314000	22796000	21366000	18499000	19443000	22677000	19273000	19702000	20275000	18173000	22422000	20169000	21005000	21396000	19553000	23228000
Q8R146	Acylamino-acid-releasing enzyme	Apeh	28	165300000	141230000	144310000	162290000	147460000	142030000	124120000	159410000	156160000	145240000	159410000	155330000	147660000	142030000	143070000	182340000
Q91WU0	Carboxylic ester hydrolase	Ces1f	28	1093500000	1210700000	1081500000	1093100000	1035600000	1092200000	896810000	1063700000	1053200000	921470000	1024200000	1135200000	1044200000	837270000	955390000	1103900000
Q9DBM2	Peroxisomal bifunctional enzyme;Enoyl-CoA hydratase/3,2-trans-enoyl-CoA isomerase;3-hydroxyacyl-CoA dehydrogenase	Ehhadh	28	50642000	76759000	65941000	90136000	89105000	53493000	158620000	60949000	69805000	81378000	125610000	102750000	71960000	84583000	70890000	65450000
Q9DC50	Peroxisomal carnitine O-octanoyltransferase	Crot	28	338870000	331770000	216140000	242350000	300830000	277100000	214400000	257810000	186430000	219080000	240480000	325860000	225430000	244950000	214100000	289250000
O88844	Isocitrate dehydrogenase [NADP] cytoplasmic	Idh1	27	877080000	864770000	798120000	1037500000	860150000	782660000	1007800000	789200000	744270000	787440000	740360000	719600000	742360000	736840000	729100000	706350000
Q8BJ64	Choline dehydrogenase, mitochondrial	Chdh	27	366340000	459040000	360040000	359560000	377510000	410840000	341150000	384140000	409950000	361030000	429700000	383010000	397510000	388400000	348950000	438670000
Q8K411	Presequence protease, mitochondrial	Pitrm1	27	63485000	60001000	65520000	69171000	59487000	81464000	56157000	66529000	69213000	63126000	67813000	63303000	65405000	71822000	61788000	67869000
Q91VA0	Acyl-coenzyme A synthetase ACSM1, mitochondrial	Acsm1	27	751410000	701600000	757130000	867880000	975920000	885370000	902510000	934140000	930770000	863280000	971810000	1014300000	1085200000	1041200000	1168800000	1267600000
Q91ZA3	Propionyl-CoA carboxylase alpha chain, mitochondrial	Pcca	27	31574000	45672000	61255000	56724000	59716000	44936000	66741000	42951000	48250000	79795000	42290000	55304000	57494000	64655000	49286000	33886000
Q9EQF5	Dihydropyrimidinase	Dpys	27	841320000	949380000	870260000	951520000	940750000	779610000	778070000	1041400000	990850000	849170000	994760000	978250000	851590000	893910000	946380000	894340000
A0A0J9YUI8	Glucokinase regulatory protein	Gckr	26	204520000	259430000	231510000	220450000	184030000	153370000	163410000	202470000	230430000	209560000	191130000	215850000	197690000	203860000	183710000	173250000
G3X9T8	Ceruloplasmin	Cp	26	66684000	57306000	54850000	48738000	59354000	63205000	49593000	61409000	44059000	55539000	55909000	59715000	48927000	49344000	53921000	54940000
P00329	Alcohol dehydrogenase 1	Adh1	26	2974600000	3938100000	3646800000	3993400000	4562000000	3042700000	3852500000	3142700000	3484600000	5469200000	3198900000	4432500000	4548700000	5089100000	3329600000	2839200000
P35564	Calnexin	Canx	26	918140000	895390000	919750000	909490000	1044700000	1065500000	829190000	1016900000	805760000	831000000	1062700000	949010000	760650000	826770000	924960000	1015200000
P50544	Very long-chain specific acyl-CoA dehydrogenase, mitochondrial	Acadvl	26	34073000	55059000	67594000	57021000	75380000	58163000	116100000	62339000	61267000	62850000	52343000	64361000	59950000	69388000	83252000	61680000
P54869	Hydroxymethylglutaryl-CoA synthase, mitochondrial	Hmgcs2	26	2217600000	3466900000	2708800000	2710000000	4048700000	3064300000	2697300000	3416600000	2592400000	3207700000	3212000000	4510700000	3591400000	3983400000	2982100000	2496600000
P55264	Adenosine kinase	Adk	26	2958300000	2537300000	2267000000	2290300000	2124800000	2219400000	2016800000	2281900000	2501100000	2039500000	2471900000	2210900000	2098600000	2376300000	2110500000	2167300000
P80316	T-complex protein 1 subunit epsilon	Cct5	26	107550000	146000000	168340000	143260000	165980000	131820000	146470000	153370000	148860000	160270000	137630000	170130000	142800000	138580000	160330000	144770000
Q68FD5	Clathrin heavy chain 1;Clathrin heavy chain	Cltc	26	2396800	4128200	3176700	7196900	4161400	2817600	77584000	1952000	2845900	4099600	4654700	2439500	3016700	3936900	3977200	5944500
Q8BH00	Aldehyde dehydrogenase family 8 member A1	Aldh8a1	26	567340000	599700000	685560000	647850000	674910000	571770000	611200000	713590000	674500000	725010000	546640000	697900000	657500000	618680000	661910000	603260000
Q8BW75	Amine oxidase [flavin-containing] B	Maob	26	219480000	208560000	230760000	235380000	252720000	201290000	268500000	179550000	230610000	286660000	190740000	207020000	236950000	228570000	238270000	176280000
Q8CHT0	Delta-1-pyrroline-5-carboxylate dehydrogenase, mitochondrial	Aldh4a1	26	846820000	700830000	419970000	438400000	427480000	617250000	401060000	328760000	397120000	488690000	471130000	443600000	432180000	473360000	372990000	571410000
Q9QXD6	Fructose-1,6-bisphosphatase 1	Fbp1	26	8974300000	7094500000	5528700000	7530100000	5534000000	6963700000	5035300000	6949700000	7211900000	6893500000	6442500000	6445400000	6312700000	6189500000	6175400000	8818600000
A2AH85	116 kDa U5 small nuclear ribonucleoprotein component	Eftud2	25	21072000	20734000	29261000	27054000	30306000	28966000	28557000	26701000	26240000	27041000	26527000	32367000	27983000	30128000	30710000	30589000
O70475	UDP-glucose 6-dehydrogenase	Ugdh	25	166940000	170950000	139780000	117260000	80871000	83905000	124170000	125540000	125790000	153250000	95714000	85056000	91154000	109600000	93642000	150450000
P05201	Aspartate aminotransferase, cytoplasmic	Got1	25	3013600000	1193200000	1214700000	1707900000	1349900000	2695300000	1345800000	1935700000	1839300000	1661100000	1916400000	1623400000	1620900000	1632000000	1382300000	2772700000
P11725	Ornithine carbamoyltransferase, mitochondrial	Otc	25	6310400000	5244300000	4640000000	5683100000	5554300000	6697000000	4859400000	6252700000	5873300000	4676300000	6079400000	5234300000	5894300000	5778700000	5617700000	7144100000
P11983	T-complex protein 1 subunit alpha	Tcp1	25	56136000	81495000	111500000	89441000	103650000	76563000	101450000	94459000	93226000	107200000	88168000	110020000	91993000	86128000	108090000	78266000
P21614	Vitamin D-binding protein	Gc	25	206870000	206630000	200760000	197660000	200320000	214370000	196090000	223480000	190710000	175510000	233050000	218560000	182360000	193920000	219380000	237300000
P32020	Non-specific lipid-transfer protein	Scp2	25	937100000	1369700000	1273400000	905000000	1351200000	1058900000	1118200000	1149700000	1099300000	1078300000	1100300000	1356800000	970760000	1095400000	1204400000	906720000
P35492	Histidine ammonia-lyase	Hal	25	345940000	199550000	202970000	228290000	168790000	198630000	210740000	172230000	258620000	254890000	150340000	163640000	216480000	258240000	169900000	161840000
Q02053	Ubiquitin-like modifier-activating enzyme 1	Uba1	25	46877000	37971000	43797000	38504000	38043000	24699000	43478000	31603000	39708000	47625000	24280000	38397000	37492000	38120000	41375000	26143000
Q02819	Nucleobindin-1	Nucb1	25	95444000	96382000	83668000	88190000	108130000	101700000	80096000	93926000	90062000	86820000	111790000	88250000	94526000	93702000	100210000	99005000
Q60864	Stress-induced-phosphoprotein 1	Stip1	25	269280000	259600000	278440000	280390000	310990000	294830000	268070000	309950000	286490000	286750000	275480000	266650000	280930000	248950000	315290000	293560000
Q921G7	Electron transfer flavoprotein-ubiquinone oxidoreductase, mitochondrial	Etfdh	25	412500000	542870000	486510000	461020000	510200000	459700000	484990000	515080000	509630000	489820000	509530000	505030000	499450000	499610000	460980000	351110000
Q9CZS1	Aldehyde dehydrogenase X, mitochondrial	Aldh1b1	25	397500000	244440000	234660000	267130000	206750000	345390000	247400000	229380000	250280000	289800000	189040000	212510000	219710000	243460000	156270000	301580000
Q9D0R2	Threonine--tRNA ligase, cytoplasmic	Tars	25	53565000	84098000	97647000	80941000	97915000	63725000	94172000	68781000	89145000	127980000	93317000	96598000	96126000	96842000	113410000	75966000
Q9DBE0	Cysteine sulfinic acid decarboxylase	Csad	25	391520000	202170000	310260000	159320000	351970000	802100000	321720000	369780000	280270000	179530000	306180000	448760000	464530000	364170000	717250000	1009500000
Q9DBF1-2	Alpha-aminoadipic semialdehyde dehydrogenase	Aldh7a1	25	2089600000	1906900000	1519000000	1950800000	1725400000	2060700000	1563000000	1904700000	1981900000	1625300000	2091400000	1694200000	1813500000	1766000000	1902900000	2593600000
D3Z041	Long-chain-fatty-acid--CoA ligase 1	Acsl1	24	189350000	225610000	265510000	254440000	306800000	192350000	392120000	231040000	237480000	298870000	185570000	263070000	232780000	244740000	266940000	178480000
O09173	Homogentisate 1,2-dioxygenase	Hgd	24	2155900000	1595800000	1299800000	1630400000	1397000000	1782400000	1319400000	1653400000	1661000000	1517600000	1652400000	1435800000	1542200000	1436700000	1394900000	2105800000
O88428	Bifunctional 3-phosphoadenosine 5-phosphosulfate synthase 2;Sulfate adenylyltransferase;Adenylyl-sulfate kinase	Papss2	24	55857000	49487000	73648000	71392000	37071000	29520000	81991000	51600000	88804000	74061000	41222000	50227000	60362000	67986000	57183000	35105000
P07901	Heat shock protein HSP 90-alpha	Hsp90aa1	24	97162000	115830000	167690000	146660000	181940000	125450000	221670000	158310000	164600000	184020000	122050000	154190000	148130000	153750000	183330000	109440000
P29341	Polyadenylate-binding protein 1	Pabpc1	24	129680000	140090000	124000000	111210000	141120000	110680000	114190000	104070000	113700000	122310000	118800000	132830000	128420000	124150000	136520000	110980000
Q8BGA8	Acyl-coenzyme A synthetase ACSM5, mitochondrial	Acsm5	24	100200000	104210000	102190000	101580000	107520000	94508000	117420000	115880000	121480000	104620000	89592000	109050000	129700000	116140000	120700000	99254000
Q8VDD5	Myosin-9	Myh9	24	18419000	28853000	29732000	27259000	22479000	23883000	31749000	17783000	29346000	42126000	19359000	28292000	31741000	30196000	22845000	22834000
Q99JY0	Trifunctional enzyme subunit beta, mitochondrial;3-ketoacyl-CoA thiolase	Hadhb	24	1065600000	1310800000	1467600000	1283800000	1872300000	1511300000	1425100000	1485800000	1447000000	1511300000	1516800000	1720000000	1624900000	1576000000	1649700000	1308200000
Q9JKR6	Hypoxia up-regulated protein 1	Hyou1	24	21072000	22918000	27685000	23649000	35331000	27350000	31897000	32690000	29322000	26852000	31351000	30253000	28764000	24981000	38041000	38062000
Q9JLJ2	4-trimethylaminobutyraldehyde dehydrogenase	Aldh9a1	24	850860000	797240000	730010000	884560000	744260000	618760000	674840000	790470000	843350000	816470000	728790000	751180000	755410000	697460000	706520000	680510000
P14733	Lamin-B1	Lmnb1	23	36212000	33259000	34524000	33844000	39766000	47648000	31244000	39692000	32846000	33619000	37442000	38062000	41425000	38789000	37552000	38277000
P17182	Alpha-enolase	Eno1	23	4362800000	5647900000	3991700000	4658000000	4112200000	4375900000	3605000000	4447000000	4848900000	4536000000	4524100000	4430500000	4487800000	4859900000	4363700000	5052400000
P26231	Catenin alpha-1	Ctnna1	23	65997000	56429000	71729000	63244000	67556000	65529000	70784000	62386000	54504000	67188000	55274000	72097000	67859000	63263000	69253000	66764000
P29758	Ornithine aminotransferase, mitochondrial	Oat	23	1344900000	1031800000	819740000	1205700000	500610000	837030000	1063100000	770670000	1465900000	1119600000	1395300000	869860000	1063900000	893360000	828580000	1156900000
P35505	Fumarylacetoacetase	Fah	23	4856200000	4244300000	3631800000	4470100000	3776500000	4003900000	3444200000	4473700000	4123500000	3668500000	4503500000	4165400000	3815500000	3877700000	3746200000	4839900000
P51855	Glutathione synthetase	Gss	23	166150000	140690000	130890000	112810000	148790000	233150000	131130000	148930000	134180000	96924000	160680000	133190000	133000000	141020000	145770000	208700000
P97807	Fumarate hydratase, mitochondrial	Fh	23	746330000	624280000	577800000	704040000	685350000	883000000	575890000	723770000	595120000	544160000	600180000	563120000	664920000	622460000	673150000	984730000
Q8BWT1	3-ketoacyl-CoA thiolase, mitochondrial	Acaa2	23	762140000	1551100000	1785600000	2094000000	2032400000	1813500000	2092200000	1995900000	2158600000	2311800000	1690600000	2137700000	2116100000	2409700000	2185800000	1408000000
Q8BWU8	Ethanolamine-phosphate phospho-lyase	Etnppl	23	125760000	55757000	38449000	49911000	50960000	168770000	51783000	73777000	65535000	42895000	60333000	44675000	64442000	69278000	69328000	214320000
Q8R086	Sulfite oxidase, mitochondrial	Suox	23	753500000	749400000	548410000	620440000	531680000	626630000	474920000	606310000	606800000	586940000	616000000	610900000	517710000	532490000	507180000	702780000
Q8VCN5	Cystathionine gamma-lyase	Cth	23	4452900000	1892400000	2003500000	2616700000	2017600000	3937300000	2119400000	2622100000	2603600000	2218100000	2387100000	2083100000	2485800000	2254300000	2176800000	4652300000
Q99MN9	Propionyl-CoA carboxylase beta chain, mitochondrial	Pccb	23	147660000	201440000	175760000	156100000	174070000	147790000	153910000	145200000	163290000	201930000	167830000	171660000	169710000	170320000	155260000	181430000
Q9D1A2	Cytosolic non-specific dipeptidase	Cndp2	23	156560000	151680000	166560000	177150000	175210000	146800000	139790000	180120000	165130000	166540000	162920000	163600000	156710000	160930000	165770000	165280000
Q9ER72	Cysteine--tRNA ligase, cytoplasmic	Cars	23	33559000	33446000	33809000	32605000	35572000	37311000	29263000	32999000	30332000	29236000	31828000	35119000	29042000	32145000	32889000	42509000
B1AV77	Aldehyde dehydrogenase;Fatty aldehyde dehydrogenase	Aldh3a2	22	704860000	1301900000	1000300000	955950000	946610000	597280000	800120000	829090000	879660000	1057700000	905080000	1082900000	846040000	772430000	755810000	552130000
O88342	WD repeat-containing protein 1	Wdr1	22	80436000	65004000	94622000	97244000	106850000	102700000	85560000	116500000	102150000	97123000	100320000	91900000	98538000	98911000	95754000	81779000
P09405	Nucleolin	Ncl	22	224310000	217930000	199240000	199880000	220240000	270180000	176520000	248290000	198490000	193900000	220600000	262800000	216330000	217680000	225220000	258080000
P16331	Phenylalanine-4-hydroxylase	Pah	22	59042000	53195000	75539000	79794000	63033000	64967000	177090000	64050000	71395000	76841000	56463000	58450000	72575000	64033000	73798000	69059000
P21981	Protein-glutamine gamma-glutamyltransferase 2	Tgm2	22	150760000	145910000	168310000	141840000	135220000	157140000	128010000	126560000	150770000	147570000	136540000	134940000	145650000	147670000	143420000	174890000
P28843	Dipeptidyl peptidase 4;Dipeptidyl peptidase 4 membrane form;Dipeptidyl peptidase 4 soluble form	Dpp4	22	36627000	45415000	68969000	69397000	71191000	43202000	59912000	51682000	64385000	72741000	49791000	57621000	72250000	57994000	51155000	33982000
P36552	Oxygen-dependent coproporphyrinogen-III oxidase, mitochondrial	Cpox	22	202050000	231580000	260910000	270200000	316260000	253640000	268670000	319170000	292420000	243870000	321470000	302960000	290560000	294760000	303140000	220240000
P48036	Annexin A5	Anxa5	22	928180000	808880000	661110000	718810000	705810000	934840000	579880000	784740000	684320000	662780000	772060000	685670000	689100000	774800000	674040000	996720000
P50285	Dimethylaniline monooxygenase [N-oxide-forming] 1	Fmo1	22	135020000	135840000	84912000	86782000	112770000	60665000	118220000	86969000	79039000	92904000	69739000	76762000	89738000	84772000	87942000	65172000
P60710	Actin, cytoplasmic 1;Actin, cytoplasmic 1, N-terminally processed	Actb	22	4292500000	3708200000	4206200000	4256900000	4390600000	4860300000	4011900000	4400500000	4146300000	4498800000	4047400000	4780600000	4448600000	4516700000	4547300000	4692200000
P80318	T-complex protein 1 subunit gamma	Cct3	22	84655000	115960000	141060000	137730000	155780000	115380000	137310000	152630000	124370000	141000000	118880000	146800000	122310000	110220000	138990000	117720000
Q3U4W8	Ubiquitin carboxyl-terminal hydrolase;Ubiquitin carboxyl-terminal hydrolase 5	Usp5	22	56669000	61846000	70827000	61084000	66453000	58645000	62352000	64817000	66965000	71114000	60356000	70866000	64920000	63023000	63185000	65713000
Q3UEG6	Alanine--glyoxylate aminotransferase 2, mitochondrial	Agxt2	22	60677000	65602000	111140000	77223000	81664000	56908000	101390000	63332000	89747000	109290000	67952000	86950000	71430000	73174000	76364000	47464000
Q61176	Arginase-1	Arg1	22	9824700000	7106600000	6157800000	7613300000	7116100000	9179200000	6135500000	8672900000	7126000000	6702700000	7293400000	7656300000	7281300000	7059300000	7561800000	10627000000
Q6GQT9	Nodal modulator 1	Nomo1	22	15865000	25935000	26907000	25986000	30633000	22111000	25387000	25842000	26896000	32988000	20119000	32593000	30487000	26114000	33157000	21462000
Q71RI9-2	Kynurenine--oxoglutarate transaminase 3	Ccbl2	22	817890000	524200000	646810000	879710000	722300000	855090000	586140000	864520000	697070000	746020000	485950000	573830000	529650000	601460000	467200000	569970000
Q8C165	Probable carboxypeptidase PM20D1	Pm20d1	22	167150000	187320000	171250000	203090000	173230000	148340000	146000000	185020000	188220000	194220000	193430000	194520000	166170000	154930000	167550000	153690000
Q8QZR5	Alanine aminotransferase 1	Gpt	22	514260000	468270000	418980000	442340000	349000000	388250000	408000000	438110000	506730000	438200000	401110000	350980000	387630000	371750000	382160000	393860000
Q8VCC2	Liver carboxylesterase 1	Ces1	22	731760000	949220000	1117400000	1037900000	847480000	518010000	882120000	942240000	1037000000	954980000	919800000	937800000	894470000	831100000	824540000	441270000
A0A0R4IZY2	Cytochrome P450 2D26	Cyp2d26	21	114730000	145580000	162450000	177340000	164820000	92190000	218840000	107500000	156950000	216790000	119940000	166260000	143160000	149940000	145920000	83391000
A0A0R4J050	Aminoacylase-1	Acy1	21	162200000	131670000	131200000	159550000	141320000	155800000	128260000	163120000	166500000	147820000	150330000	130320000	148850000	152930000	146520000	132690000
A2ATU0	Probable 2-oxoglutarate dehydrogenase E1 component DHKTD1, mitochondrial	Dhtkd1	21	72215000	68204000	57855000	52774000	49721000	45733000	68825000	48320000	64294000	68660000	58734000	53419000	58246000	61207000	52946000	48415000
A3KMP2	Tetratricopeptide repeat protein 38	Ttc38	21	190820000	129530000	119010000	138930000	94077000	133270000	108020000	112440000	133890000	136250000	115660000	106120000	107520000	110060000	100290000	123170000
D6RGQ0	Complement factor H	Cfh	21	66006000	60107000	57430000	50139000	66519000	68682000	51065000	69627000	50916000	51131000	59621000	59260000	65632000	55796000	68027000	63706000
E9PZ16	Basement membrane-specific heparan sulfate proteoglycan core protein;Endorepellin;LG3 peptide	Hspg2	21	11995000	25371000	12949000	16539000	13497000	14805000	9560700	10781000	7342000	8387900	13596000	12605000	10711000	8880300	10471000	12535000
P16460	Argininosuccinate synthase	Ass1	21	602740000	548270000	581110000	758730000	572540000	672130000	1795600000	400870000	619680000	659440000	552960000	433460000	529730000	629920000	585450000	680160000
P20918	Plasminogen;Plasmin heavy chain A;Activation peptide;Angiostatin;Plasmin heavy chain A, short form;Plasmin light chain B	Plg	21	55442000	44384000	47598000	47831000	50584000	57891000	47933000	52484000	44241000	49118000	49247000	50308000	39778000	36794000	42523000	52641000
P24549	Retinal dehydrogenase 1	Aldh1a1	21	2232000000	4401700000	3475200000	3144300000	2562200000	1274800000	2623100000	2587200000	2971000000	3097200000	3310800000	2474900000	2779900000	2411300000	2234100000	1100100000
P26041	Moesin	Msn	21	118930000	95526000	102570000	91993000	91157000	119910000	82557000	92525000	87712000	77971000	118650000	90966000	87234000	98881000	88905000	110970000
P27546-2	Microtubule-associated protein 4	Map4	21	27510000	30021000	27918000	25600000	23697000	26461000	23041000	21516000	20380000	23017000	31907000	22769000	23900000	23978000	21552000	22721000
P62259	14-3-3 protein epsilon	Ywhae	21	1093500000	1059100000	1088800000	1037100000	1110900000	1235400000	1042700000	1099400000	1178800000	1102000000	1157500000	1127300000	1139000000	1115300000	1119600000	1131000000
Q64458	Cytochrome P450 2C29	Cyp2c29	21	20155000	35445000	36752000	56568000	42431000	23189000	151780000	30482000	40886000	39054000	53416000	27889000	35649000	36244000	37400000	30744000
Q8BWF0	Succinate-semialdehyde dehydrogenase, mitochondrial	Aldh5a1	21	307160000	366740000	285160000	300560000	258490000	281000000	250630000	274830000	322260000	293780000	298290000	296670000	281200000	307020000	281990000	303150000
Q8QZR3	Pyrethroid hydrolase Ces2a	Ces2a	21	905670000	735540000	583910000	751790000	628050000	946810000	551430000	722700000	708280000	537030000	744000000	696960000	741840000	645550000	715040000	1253000000
Q922D8	C-1-tetrahydrofolate synthase, cytoplasmic;Methylenetetrahydrofolate dehydrogenase;Methenyltetrahydrofolate cyclohydrolase;Formyltetrahydrofolate synthetase;C-1-tetrahydrofolate synthase, cytoplasmic, N-terminally processed	Mthfd1	21	21285000	35284000	50860000	50069000	39196000	24328000	90814000	28317000	50311000	58400000	30065000	40276000	41152000	42768000	38879000	30207000
Q9CXN7	Phenazine biosynthesis-like domain-containing protein 2	Pbld2	21	1351400000	1561500000	1442500000	1528500000	1472400000	1391600000	1266500000	1643000000	1630100000	1340000000	1601800000	1555500000	1367500000	1504600000	1383000000	1413200000
Q9D819	Inorganic pyrophosphatase	Ppa1	21	1041500000	796830000	754350000	722180000	731660000	939770000	664620000	852180000	757080000	772810000	746410000	771720000	667230000	753980000	796350000	954260000
Q9D826	Peroxisomal sarcosine oxidase	Pipox	21	187040000	207930000	256470000	190090000	193200000	160530000	222420000	196980000	240690000	204340000	176380000	217900000	172310000	182350000	196560000	154120000
Q9JIL4	Na(+)/H(+) exchange regulatory cofactor NHE-RF3	Pdzk1	21	72262000	75064000	72353000	73119000	83923000	79055000	70549000	77490000	73483000	67077000	84590000	79790000	74962000	75221000	79306000	66985000
Q9JMH6	Thioredoxin reductase 1, cytoplasmic	Txnrd1	21	325350000	293230000	245930000	255980000	214200000	261530000	228800000	241970000	275330000	253500000	277110000	218580000	243050000	254790000	234010000	267520000
Q9QXF8	Glycine N-methyltransferase	Gnmt	21	7269600000	4958100000	4217200000	5352000000	3343500000	5316600000	3881600000	4370000000	4528100000	5079400000	4864000000	4499400000	4185100000	4274600000	3645100000	5665400000
A0A0R4J293	Protein-glutamine gamma-glutamyltransferase K	Tgm1	20	65919000	58291000	78070000	77837000	98066000	68942000	70609000	83497000	78074000	80551000	95463000	89605000	82209000	66859000	86170000	89302000
A0A0U1RPV8	Thioredoxin reductase 2, mitochondrial	Txnrd2	20	286060000	327610000	273760000	285570000	264370000	309500000	253380000	288880000	280650000	251200000	295440000	291850000	260100000	269110000	266310000	331550000
O09159	Lysosomal alpha-mannosidase	Man2b1	20	77151000	76707000	69758000	89011000	87662000	90885000	66207000	91333000	82050000	75859000	95546000	86120000	85175000	92214000	110870000	106530000
O35423-2	Serine--pyruvate aminotransferase, mitochondrial	Agxt	20	1049800000	426650000	659790000	821960000	791340000	1865400000	697550000	1073100000	769580000	675470000	692470000	796460000	691440000	649460000	642600000	1069000000
P16015	Carbonic anhydrase 3	Ca3	20	7000900000	9196400000	6734700000	7769900000	5277200000	4829300000	4698400000	6084900000	6846100000	7004300000	5756500000	4701400000	5800400000	5319900000	4775700000	4134100000
P16406	Glutamyl aminopeptidase	Enpep	20	24287000	26378000	33556000	33697000	29057000	35491000	28820000	30937000	34452000	43393000	30865000	33329000	34170000	33771000	30198000	35624000
P48678	Prelamin-A/C;Lamin-A/C	Lmna	20	42001000	58485000	45567000	42476000	57404000	60588000	41553000	45322000	38895000	41912000	46139000	49892000	56461000	46068000	43031000	43393000
P50516	V-type proton ATPase catalytic subunit A	Atp6v1a	20	30137000	28381000	34289000	28888000	33981000	38130000	32759000	31673000	30393000	33004000	29678000	32761000	32248000	30897000	31704000	34541000
P58710	L-gulonolactone oxidase	Gulo	20	531970000	711860000	790510000	799030000	864250000	576590000	910660000	778420000	845930000	871040000	863750000	834740000	749550000	660930000	818810000	555370000
P68040	Guanine nucleotide-binding protein subunit beta-2-like 1;Guanine nucleotide-binding protein subunit beta-2-like 1, N-terminally processed	Gnb2l1	20	440660000	375630000	349840000	362470000	420530000	441190000	326470000	407770000	371660000	370920000	386360000	396860000	405230000	357580000	376960000	438960000
P68372	Tubulin beta-4B chain;Tubulin beta-4A chain	Tubb4b;Tubb4a	20	52462000	69908000	84820000	89194000	94879000	65843000	156480000	76046000	63036000	81307000	80997000	78720000	77277000	77983000	82732000	63010000
P97872	Dimethylaniline monooxygenase [N-oxide-forming] 5	Fmo5	20	158820000	118780000	72000000	77832000	67967000	69897000	152960000	81659000	83769000	103190000	67045000	52840000	81853000	100710000	77164000	71010000
Q78JT3	3-hydroxyanthranilate 3,4-dioxygenase	Haao	20	2011800000	1947800000	1566400000	1846500000	1445700000	1660900000	1464000000	1728800000	1926800000	1709100000	1820300000	1604400000	1642900000	1688200000	1609900000	1782000000
Q80UM7	Mannosyl-oligosaccharide glucosidase	Mogs	20	77666000	69079000	79215000	79527000	91739000	84352000	74271000	98214000	73075000	85714000	65363000	82862000	95592000	76453000	87812000	71071000
Q8BFR5	Elongation factor Tu, mitochondrial	Tufm	20	57245000	110660000	85671000	98269000	86004000	83639000	140210000	106270000	130460000	94162000	120430000	63244000	126450000	121340000	127600000	129220000
Q8BWN8	Acyl-coenzyme A thioesterase 4	Acot4	20	342320000	414850000	321640000	363370000	275220000	264340000	250430000	294030000	322710000	337510000	316490000	323350000	250180000	307570000	243140000	273590000
Q8BWQ1	UDP-glucuronosyltransferase 2A3	Ugt2a3	20	211760000	217210000	277010000	274690000	293440000	206820000	267870000	233180000	271510000	266900000	281160000	285270000	281780000	262620000	299110000	239280000
Q8K370	Acyl-CoA dehydrogenase family member 10	Acad10	20	163480000	129390000	130920000	156310000	135600000	142710000	124140000	177340000	146740000	168360000	132710000	151050000	125430000	154600000	136940000	167680000
Q91WT9-2	Cystathionine beta-synthase	Cbs	20	106190000	90995000	145780000	119370000	122240000	106000000	125990000	118520000	131100000	123840000	103490000	113530000	109680000	101910000	117250000	118710000
Q91X83	S-adenosylmethionine synthase isoform type-1	Mat1a	20	1338400000	1057900000	1660300000	1444600000	1240100000	1398600000	1673600000	1577900000	1708100000	1675600000	1343000000	1308600000	1401200000	1519600000	1292200000	1101200000
Q91YQ5	Dolichyl-diphosphooligosaccharide--protein glycosyltransferase subunit 1	Rpn1	20	138160000	175840000	265610000	239130000	283580000	203860000	243140000	176220000	182290000	266420000	166930000	268530000	256190000	193290000	244280000	140620000
Q91ZJ5	UTP--glucose-1-phosphate uridylyltransferase	Ugp2	20	73898000	84399000	134200000	86961000	145600000	33218000	190020000	97624000	118990000	159310000	55890000	64168000	99321000	90907000	122930000	58650000
Q921H8	3-ketoacyl-CoA thiolase A, peroxisomal	Acaa1a	20	641560000	1243300000	923850000	848310000	778160000	566610000	734910000	737210000	954910000	844840000	843570000	965000000	733350000	810640000	778510000	632530000
Q99MN1	Lysine--tRNA ligase	Kars	20	89941000	71393000	85054000	92038000	95943000	101490000	88458000	103570000	93931000	97533000	102110000	85379000	90740000	94365000	100210000	98198000
Q9D6Y9	1,4-alpha-glucan-branching enzyme	Gbe1	20	29686000	92224000	145350000	112500000	57864000	6103200	130580000	63169000	136540000	60242000	116650000	76183000	59467000	31721000	133770000	61533000
A0A0R4J083	Long-chain specific acyl-CoA dehydrogenase, mitochondrial	Acadl	19	1542100000	1384900000	1394800000	1382500000	1526700000	1778600000	1363200000	1479300000	1519400000	1278600000	1663700000	1515900000	1398500000	1504200000	1467200000	1658700000
A0A1B0GSG5	Ribonuclease inhibitor	Rnh1	19	84803000	60070000	68402000	45538000	46837000	58582000	49712000	50893000	53846000	56089000	48822000	61238000	53318000	58046000	51279000	64326000
E9Q0U7	Heat shock protein 105 kDa	Hsph1	19	30554000	26810000	35145000	39003000	39669000	38371000	39434000	47151000	40910000	33817000	38895000	36118000	35246000	33059000	46421000	40813000
G3X9S2	Ectonucleotide pyrophosphatase/phosphodiesterase family member 1;Alkaline phosphodiesterase I;Nucleotide pyrophosphatase	Enpp1	19	51975000	56628000	55699000	51610000	58290000	56450000	45730000	57834000	51884000	52878000	57214000	65981000	51307000	44282000	47664000	73422000
O08553	Dihydropyrimidinase-related protein 2	Dpysl2	19	108140000	79717000	85135000	74690000	83706000	99185000	67825000	84433000	72054000	74962000	95325000	88055000	71398000	77447000	70641000	108930000
O88587	Catechol O-methyltransferase	Comt	19	339300000	447090000	395630000	404950000	478270000	318420000	342200000	503740000	455420000	398560000	400990000	444760000	437460000	400900000	515570000	440900000
P06151	L-lactate dehydrogenase A chain;L-lactate dehydrogenase	Ldha	19	314700000	329460000	271540000	166160000	300220000	152720000	319020000	140070000	191190000	325780000	152910000	232050000	194280000	220450000	193430000	163800000
P06745	Glucose-6-phosphate isomerase	Gpi	19	620030000	661620000	541870000	661780000	517360000	584290000	502190000	652550000	621860000	629400000	651720000	559110000	635000000	699180000	580880000	865750000
P10126	Elongation factor 1-alpha 1	Eef1a1	19	804200000	1110000000	1311000000	1139600000	1547300000	1101400000	1852800000	1282600000	1188000000	1253500000	1173700000	1243900000	1259700000	1116500000	1384200000	1146200000
P10518	Delta-aminolevulinic acid dehydratase	Alad	19	526980000	593030000	572800000	615580000	593000000	534900000	526010000	629030000	630970000	544100000	653870000	645120000	617120000	570170000	582280000	616200000
P12265	Beta-glucuronidase	Gusb	19	48100000	50464000	37605000	39926000	54228000	64369000	43758000	51071000	47479000	43743000	59108000	52115000	62482000	58038000	56815000	71670000
P14211	Calreticulin	Calr	19	1062200000	1011500000	904640000	841060000	1128200000	996080000	828630000	1000200000	867610000	717690000	946680000	934010000	793000000	823480000	1160800000	983830000
P27046	Alpha-mannosidase 2	Man2a1	19	32719000	34879000	26167000	29870000	27304000	23295000	25258000	30229000	25236000	35568000	23022000	25066000	25059000	25586000	25285000	29955000
P70694	Estradiol 17 beta-dehydrogenase 5	Akr1c6	19	622430000	668060000	940980000	707680000	961330000	534570000	1085700000	782420000	898100000	863870000	699500000	840000000	899440000	775980000	918570000	551920000
Q3TVK3	Aspartyl aminopeptidase	Dnpep	19	223630000	202590000	196820000	202150000	195790000	224540000	178080000	232840000	213970000	198520000	231230000	227790000	216130000	205230000	210280000	242460000
Q3U3J1	2-oxoisovalerate dehydrogenase subunit alpha, mitochondrial	Bckdha	19	136960000	106880000	125870000	136520000	149190000	158650000	147870000	161670000	161140000	169100000	173540000	170430000	141290000	172170000	163860000	160910000
Q60866	Phosphotriesterase-related protein	Pter	19	358740000	238150000	261740000	260040000	256580000	343600000	223130000	291340000	288440000	256020000	310090000	249300000	255170000	278030000	282030000	355880000
Q64FW2	All-trans-retinol 13,14-reductase	Retsat	19	44223000	84899000	51267000	54675000	85892000	53746000	61891000	56515000	51349000	83401000	82198000	102980000	84881000	114770000	55972000	44657000
Q6GT24	Peroxiredoxin-6	Prdx6	19	5068600000	4700300000	4361700000	5413600000	4258500000	4357700000	3837800000	5563100000	5115800000	4833000000	5240400000	4924000000	4184500000	4308800000	4589300000	4631400000
Q7TPR4	Alpha-actinin-1	Actn1	19	31414000	34733000	31999000	31844000	31294000	37247000	31236000	32277000	29396000	29463000	32642000	32549000	27965000	32250000	33674000	33631000
Q8C5H8	NAD kinase 2, mitochondrial	Nadk2	19	406360000	336260000	311990000	321830000	340730000	415130000	313290000	354610000	361050000	301830000	382460000	351460000	333460000	329040000	350180000	444710000
Q8QZT1	Acetyl-CoA acetyltransferase, mitochondrial	Acat1	19	2144000000	2610800000	2314100000	2300000000	2626200000	2170800000	2418500000	2613800000	2576900000	2088100000	2548400000	2844600000	2443600000	2360100000	2457300000	2069100000
Q8VC28	Aldo-keto reductase family 1 member C13	Akr1c13	19	167020000	183460000	186630000	160980000	203500000	171520000	206210000	183150000	193920000	190980000	204440000	202780000	192230000	207240000	213070000	188410000
Q8VDK1-2	Nitrilase homolog 1	Nit1	19	372200000	297790000	312270000	332670000	309650000	353650000	294800000	381790000	354120000	315450000	367990000	350740000	344460000	327640000	340320000	395310000
Q924Y0	Gamma-butyrobetaine dioxygenase	Bbox1	19	128580000	187670000	158430000	160820000	173330000	146810000	138900000	169250000	171100000	167330000	185800000	185210000	165210000	188810000	155430000	131220000
Q99JY9	Actin-related protein 3	Actr3	19	137250000	105760000	129130000	138080000	146920000	152800000	123570000	126840000	133000000	146270000	143850000	144700000	144670000	150170000	127990000	130080000
Q99KC8	von Willebrand factor A domain-containing protein 5A	Vwa5a	19	46179000	50566000	44933000	41184000	46948000	41984000	36013000	37318000	30292000	32226000	50880000	37704000	31957000	34251000	39967000	37013000
Q9DB77	Cytochrome b-c1 complex subunit 2, mitochondrial	Uqcrc2	19	710900000	683110000	778650000	822390000	855900000	1021500000	770030000	860050000	807780000	721080000	891120000	806470000	891770000	766820000	855820000	815360000
Q9DBA8	Probable imidazolonepropionase	Amdhd1	19	502990000	283250000	315900000	336530000	311570000	421660000	276800000	326010000	353460000	380930000	260030000	294070000	304600000	364120000	296210000	334450000
Q9JI75	Ribosyldihydronicotinamide dehydrogenase [quinone]	Nqo2	19	710610000	522020000	502430000	607140000	434970000	597840000	414150000	502760000	604350000	565860000	610260000	508590000	476640000	524620000	453070000	501470000
Q9JII6	Alcohol dehydrogenase [NADP(+)]	Akr1a1	19	1494600000	1795700000	1227700000	1224600000	1221000000	1165100000	1094200000	1270100000	1477100000	1264100000	1275600000	1272800000	1330300000	1359700000	1325600000	1244000000
A0A087WRE7	Hydroxyacid-oxoacid transhydrogenase, mitochondrial	Adhfe1	18	191480000	182940000	175190000	221970000	194200000	222290000	162830000	215730000	199670000	181080000	197470000	201170000	185270000	196200000	182360000	242990000
A0A0A0MQF6	Glyceraldehyde-3-phosphate dehydrogenase	Gapdh;Gm3839	18	4364700000	4432200000	4621300000	4618800000	3644500000	3751900000	3537000000	4824100000	4653700000	4897900000	3645000000	3868000000	4346700000	4366200000	4429900000	4172000000
A2BIN1	Major urinary protein 10	Mup10;Mup1	18	407980000	1053800000	1182100000	1210400000	2736100000	708960000	1637300000	2364200000	1296200000	1161500000	1343900000	1712400000	1701100000	1128900000	2178900000	514900000
A8DUK4	Hemoglobin subunit beta-1	Hbbt1;Hbb-b1;Hbb-bs	18	20863000000	22038000000	19652000000	23508000000	28145000000	27093000000	28419000000	22843000000	16596000000	25802000000	18765000000	25850000000	24786000000	18795000000	20437000000	23281000000
B2M1R6	Heterogeneous nuclear ribonucleoprotein K	Hnrnpk	18	332900000	332410000	318250000	277490000	343450000	304340000	286330000	250260000	293120000	282880000	338840000	373430000	338670000	324080000	365660000	357390000
E9PZF0	Nucleoside diphosphate kinase;Nucleoside diphosphate kinase B	Gm20390;Nme2	18	1185800000	1178800000	1038200000	1120700000	1192400000	1502600000	1057400000	1323400000	1265600000	1023700000	1380800000	1148400000	1235800000	1264500000	1338200000	1530600000
E9Q7C8	Cytochrome P450 2C40	Cyp2c40	18	76219000	67108000	60102000	91372000	114350000	60157000	105090000	83632000	81865000	101200000	56541000	65382000	70011000	82242000	103060000	79497000
O08749	Dihydrolipoyl dehydrogenase, mitochondrial	Dld	18	532610000	623320000	470480000	491430000	558370000	586580000	469430000	575650000	437430000	436410000	549850000	502780000	555620000	534100000	531400000	683730000
O09174	Alpha-methylacyl-CoA racemase	Amacr	18	262830000	227670000	212370000	206690000	231720000	312510000	195760000	262200000	206830000	179340000	228810000	236740000	221670000	220360000	240800000	314010000
O55029	Coatomer subunit beta	Copb2	18	19647000	28908000	44386000	35964000	38403000	30861000	39926000	35415000	35080000	39772000	33311000	40084000	38461000	36651000	35789000	27243000
P09055	Integrin beta-1	Itgb1	18	94384000	72381000	78024000	73831000	80149000	109520000	70904000	82272000	69203000	69621000	79536000	80847000	78061000	75489000	83479000	93055000
P13707	Glycerol-3-phosphate dehydrogenase [NAD(+)], cytoplasmic;Glycerol-3-phosphate dehydrogenase [NAD(+)]	Gpd1	18	33388000	98069000	95460000	63101000	93332000	55169000	100010000	67616000	82981000	90288000	70992000	102510000	81461000	76484000	87569000	56399000
P15105	Glutamine synthetase	Glul	18	739660000	1461700000	1329600000	1336800000	1583500000	759570000	1472400000	1577400000	1489800000	1407100000	2037000000	1548800000	1519600000	1474400000	1457200000	949440000
P15626	Glutathione S-transferase Mu 2	Gstm2	18	4675600000	4697000000	4260700000	4380800000	3136600000	2556200000	4021000000	3106000000	4777000000	5368100000	4088800000	4117300000	3750700000	4084400000	3439600000	3045700000
P25688	Uricase	Uox	18	621870000	687350000	614330000	734140000	505500000	729720000	533480000	617030000	677500000	715400000	642830000	772460000	727330000	689240000	598360000	606460000
P28474	Alcohol dehydrogenase class-3	Adh5	18	301820000	309270000	346500000	298580000	346160000	268450000	390160000	293180000	343400000	404830000	269780000	365720000	352380000	342360000	322660000	253790000
P30416	Peptidyl-prolyl cis-trans isomerase FKBP4;Peptidyl-prolyl cis-trans isomerase FKBP4, N-terminally processed;Peptidyl-prolyl cis-trans isomerase	Fkbp4	18	78241000	76496000	101640000	83714000	101340000	79237000	93224000	88923000	93402000	97428000	89033000	87640000	69164000	67944000	91762000	73220000
P45952	Medium-chain specific acyl-CoA dehydrogenase, mitochondrial	Acadm	18	935870000	979380000	869240000	956390000	1025000000	978310000	820470000	1147500000	1023600000	916110000	1013700000	974900000	910800000	1054700000	947020000	893540000
P50580	Proliferation-associated protein 2G4	Pa2g4	18	280950000	268680000	248550000	253530000	288900000	315810000	232260000	292360000	244360000	258690000	261170000	271360000	282260000	255180000	280050000	301100000
P52480	Pyruvate kinase PKM	Pkm	18	171800000	102350000	122980000	126130000	123530000	142900000	83321000	117070000	92015000	93633000	119550000	103410000	142670000	119640000	104450000	133460000
P97364	Selenide, water dikinase 2	Sephs2	18	136900000	158220000	189590000	171100000	170900000	169140000	158450000	177650000	173720000	175390000	157070000	183460000	181680000	167530000	173500000	188990000
P97494	Glutamate--cysteine ligase catalytic subunit	Gclc	18	127860000	103480000	99577000	82933000	96397000	86909000	110180000	95458000	91592000	89953000	82035000	90263000	92784000	93883000	101990000	128010000
Q02248	Catenin beta-1	Ctnnb1	18	27172000	21195000	29823000	22628000	30914000	28917000	31801000	26820000	26533000	26318000	24224000	27569000	27112000	24597000	25169000	27188000
Q07417	Short-chain specific acyl-CoA dehydrogenase, mitochondrial	Acads	18	1112700000	1296100000	979950000	1013500000	1075600000	1122200000	961190000	1216200000	1185700000	1019100000	1190800000	1089500000	1083200000	1087700000	1108400000	1233900000
Q61035	Histidine--tRNA ligase, cytoplasmic	Hars	18	71269000	58905000	67949000	73208000	70114000	81756000	65017000	73248000	76158000	68262000	76069000	71421000	73000000	74889000	76628000	78980000
Q7TNG8	Probable D-lactate dehydrogenase, mitochondrial	Ldhd	18	126990000	137240000	147670000	139150000	133220000	158380000	125870000	140610000	182420000	137520000	147240000	136740000	165750000	150890000	136730000	153390000
Q8BFW7	Lipoma-preferred partner homolog	Lpp	18	42907000	35747000	33504000	30558000	28972000	39292000	29035000	28253000	30017000	29729000	35365000	29832000	29603000	32270000	27363000	32754000
Q8BGQ7	Alanine--tRNA ligase, cytoplasmic	Aars	18	11514000	17833000	26535000	19682000	19988000	13549000	27915000	16618000	23106000	23858000	16802000	24228000	18747000	19811000	22535000	14896000
Q8BTY1	Kynurenine--oxoglutarate transaminase 1	Ccbl1	18	180200000	114190000	119900000	147680000	165010000	245280000	128020000	199090000	171210000	120960000	164500000	155720000	182080000	167840000	197160000	259900000
Q8CFX1	GDH/6PGL endoplasmic bifunctional protein;Glucose 1-dehydrogenase;6-phosphogluconolactonase	H6pd	18	42369000	44423000	44137000	44463000	37797000	26103000	43949000	30598000	41620000	41684000	36036000	35879000	33243000	32715000	46096000	25732000
Q8VC30	Bifunctional ATP-dependent dihydroxyacetone kinase/FAD-AMP lyase (cyclizing);ATP-dependent dihydroxyacetone kinase;FAD-AMP lyase (cyclizing)	Dak	18	33543000	68149000	54166000	62256000	58958000	26529000	126640000	42691000	58414000	73656000	49726000	65684000	48396000	58867000	50516000	48861000
Q8VCW8	Acyl-CoA synthetase family member 2, mitochondrial	Acsf2	18	29659000	75726000	84636000	66126000	80435000	45026000	121770000	53390000	82079000	89511000	64809000	83589000	76527000	79636000	77408000	53251000
Q8VCX1	3-oxo-5-beta-steroid 4-dehydrogenase	Akr1d1	18	579310000	557400000	401920000	380120000	437660000	354230000	435940000	446970000	445730000	414370000	372900000	361850000	459320000	464710000	470670000	521640000
Q8VIJ6	Splicing factor, proline- and glutamine-rich	Sfpq	18	91067000	91233000	94530000	70510000	108120000	89513000	91698000	72416000	89740000	71313000	98718000	98793000	85095000	87934000	98113000	113650000
Q91VM9	Inorganic pyrophosphatase 2, mitochondrial	Ppa2	18	170740000	185660000	160520000	157020000	157210000	170640000	150060000	172730000	180830000	151110000	190090000	175650000	153980000	167770000	165280000	191950000
Q91X72	Hemopexin	Hpx	18	300670000	275000000	233630000	207260000	236190000	407420000	181310000	287940000	178660000	203050000	241970000	213270000	223340000	221270000	215060000	358450000
Q91Y97	Fructose-bisphosphate aldolase B	Aldob	18	2568100000	2836700000	1589300000	1501500000	1331200000	1081300000	1799700000	1293200000	1451300000	2031200000	1407500000	1433500000	1528500000	1676700000	1333000000	1158300000
Q922Q1	Mitochondrial amidoxime reducing component 2	Marc2	18	628540000	781430000	548380000	632180000	621280000	567890000	518550000	647290000	608230000	709060000	618520000	588330000	590070000	533310000	464240000	544740000
Q9CY58	Plasminogen activator inhibitor 1 RNA-binding protein	Serbp1	18	134670000	139890000	146000000	116480000	139760000	143180000	128380000	122620000	126990000	128130000	142300000	138480000	127560000	129150000	133070000	137500000
Q9D1Q6	Endoplasmic reticulum resident protein 44	Erp44	18	188220000	143080000	162310000	154970000	166250000	178280000	150290000	179930000	152130000	147490000	144950000	158340000	147010000	151090000	170140000	151170000
Q9DBJ1	Phosphoglycerate mutase 1	Pgam1	18	1592600000	1656500000	1269600000	1429300000	1419600000	1706800000	1256900000	1546200000	1625400000	1352700000	1586800000	1332300000	1438600000	1606700000	1462800000	1668600000
Q9DC61	Mitochondrial-processing peptidase subunit alpha	Pmpca	18	85761000	83742000	71673000	76824000	75971000	96936000	68999000	84480000	81638000	71415000	83608000	82746000	80862000	83324000	85984000	104020000
Q9JHI5	Isovaleryl-CoA dehydrogenase, mitochondrial	Ivd	18	270960000	194190000	210540000	220960000	278530000	339680000	239500000	258850000	321500000	242740000	278040000	236800000	264180000	276680000	276000000	241420000
A0A1B0GR11	Transaldolase	Taldo1	17	266350000	296350000	238130000	204620000	220690000	215300000	204470000	205100000	250180000	232980000	255900000	210850000	226870000	243040000	241440000	226580000
A2ABY3	Ethanolamine-phosphate cytidylyltransferase	Pcyt2	17	266100000	270060000	251540000	208020000	197560000	219750000	193400000	199790000	253230000	254620000	252070000	232170000	194280000	225380000	216140000	210640000
O09131	Glutathione S-transferase omega-1	Gsto1	17	461830000	399500000	354020000	428660000	403940000	543510000	337770000	443500000	428780000	376390000	435260000	375620000	394740000	415480000	380620000	542410000
O35459	Delta(3,5)-Delta(2,4)-dienoyl-CoA isomerase, mitochondrial	Ech1	17	376920000	516440000	424040000	429630000	581930000	519690000	441440000	531810000	460280000	395000000	561250000	630810000	447160000	504810000	538320000	577770000
O35488	Very long-chain acyl-CoA synthetase	Slc27a2	17	10276000	25392000	23558000	23906000	30687000	13746000	66184000	13563000	18044000	22010000	21457000	22258000	20614000	22602000	25147000	16681000
O88569	Heterogeneous nuclear ribonucleoproteins A2/B1	Hnrnpa2b1	17	708120000	638700000	755630000	759070000	828380000	896150000	705500000	829010000	767630000	720060000	823510000	891280000	837730000	800420000	898780000	860380000
P07310	Creatine kinase M-type	Ckm	17	45409	39457	13285	37383	44332000	22685000	38055	156960000	43240	39355	32806	38239	911500000	32096	649718	15135
P26039	Talin-1	Tln1	17	11064000	17190000	16126000	14983000	11880000	12033000	23254000	5699100	14030000	15037000	11604000	15802000	17369000	12222000	16719000	14452000
P33267	Cytochrome P450 2F2	Cyp2f2	17	12207000	30434000	30445000	23429000	40571000	14593000	46647000	30227000	31046000	36590000	23841000	23363000	26522000	26194000	29674000	16022000
P48758	Carbonyl reductase [NADPH] 1	Cbr1	17	83990000	152850000	162040000	130300000	175170000	153320000	186380000	151900000	235710000	176420000	173280000	177690000	194490000	190820000	218640000	212670000
P61222	ATP-binding cassette sub-family E member 1	Abce1	17	51240000	52144000	48799000	47021000	52883000	45339000	47489000	58238000	53530000	49801000	50508000	56295000	55598000	51414000	55911000	56557000
P70441	Na(+)/H(+) exchange regulatory cofactor NHE-RF1	Slc9a3r1	17	182250000	163190000	168320000	165010000	177800000	196870000	162470000	170870000	187740000	157330000	206630000	166790000	180380000	171950000	185030000	181330000
P97449	Aminopeptidase N	Anpep	17	57040000	70991000	56743000	52037000	52059000	53231000	49644000	40778000	46318000	68293000	57598000	63600000	51837000	57323000	42398000	60534000
Q05421	Cytochrome P450 2E1	Cyp2e1	17	18199000	49308000	42346000	51593000	62022000	22927000	157400000	34559000	47329000	47004000	51317000	48653000	48457000	51521000	46218000	30472000
Q3TJI8	Corticosteroid 11-beta-dehydrogenase isozyme 1	Hsd11b1	17	2642100000	2495000000	2319800000	2485500000	2794000000	2306800000	2359400000	2859500000	2066400000	2345400000	2125100000	2060800000	2622100000	2225200000	2396200000	2484200000
Q3U1J4	DNA damage-binding protein 1	Ddb1	17	18206000	22271000	31388000	27131000	33758000	22291000	27537000	29760000	26826000	34365000	21524000	31930000	27378000	27022000	27511000	21370000
Q3V3R4	Integrin alpha-1	Itga1	17	53781000	43177000	42664000	40771000	47807000	56387000	43212000	48823000	40325000	38068000	47232000	44723000	40557000	39132000	36021000	45301000
Q60710	Deoxynucleoside triphosphate triphosphohydrolase SAMHD1	Samhd1	17	43328000	32273000	47965000	46032000	46680000	48823000	37507000	49171000	38598000	43419000	55993000	46890000	41376000	55997000	44759000	45549000
Q60759	Glutaryl-CoA dehydrogenase, mitochondrial	Gcdh	17	357500000	481900000	710550000	853310000	608630000	537510000	753900000	767740000	940630000	723980000	635420000	724020000	782860000	777820000	780410000	673030000
Q63886	UDP-glucuronosyltransferase 1-1	Ugt1a1	17	272910000	297590000	474930000	431080000	493620000	318580000	555510000	345810000	382780000	419200000	324010000	399000000	420840000	426810000	435780000	275710000
Q64374	Regucalcin	Rgn	17	12392000000	10858000000	10965000000	12404000000	11589000000	11489000000	10221000000	12440000000	13746000000	11069000000	16443000000	11231000000	12528000000	11667000000	11975000000	11335000000
Q8BIJ6	Isoleucine--tRNA ligase, mitochondrial	Iars2	17	25800000	31096000	39386000	32443000	35720000	31816000	39162000	38101000	35760000	42158000	29174000	39386000	36291000	33497000	35683000	36906000
Q8JZZ5	Phosphatidylinositol transfer protein beta isoform	Pitpnb	17	63196000	59024000	53151000	52147000	56259000	56247000	51140000	55674000	58364000	47740000	67141000	53023000	52093000	52363000	53303000	55667000
Q99LC5	Electron transfer flavoprotein subunit alpha, mitochondrial	Etfa	17	1330000000	1527400000	1783500000	1867300000	1935100000	1690000000	1798500000	1893500000	1858200000	1954000000	1577300000	2157700000	1898400000	1835400000	2120700000	1863400000
Q9CQF9	Prenylcysteine oxidase	Pcyox1	17	102140000	104440000	84489000	92186000	101880000	78742000	79729000	87068000	85368000	80150000	92312000	83164000	85255000	73428000	84967000	69721000
Q9CWS0	N(G),N(G)-dimethylarginine dimethylaminohydrolase 1	Ddah1	17	471050000	533310000	483760000	530800000	408150000	370170000	354090000	394440000	509820000	467700000	469810000	424790000	386800000	461700000	314930000	333750000
Q9DCW4	Electron transfer flavoprotein subunit beta	Etfb	17	1969300000	2077800000	2308200000	2194700000	2492800000	2837400000	2378000000	2662000000	2444300000	2507000000	2326400000	2649600000	2510200000	2306500000	2460600000	2477000000
Q9JMA7	Cytochrome P450 3A41	Cyp3a41a	17	12785000	31250000	23043000	47119000	30089000	10731000	110660000	22175000	25069000	42688000	27732000	26886000	24762000	33124000	21873000	17595000
Q9R111	Guanine deaminase	Gda	17	40331000	53588000	60204000	61580000	62795000	47407000	54179000	63956000	59963000	67018000	49515000	61580000	60939000	52456000	48427000	43948000
Q9WTP6-2	Adenylate kinase 2, mitochondrial;Adenylate kinase 2, mitochondrial, N-terminally processed	Ak2	17	1306000000	1380300000	977590000	1187800000	1003900000	1420400000	986120000	1087500000	1233000000	1018700000	1286400000	1087900000	1252600000	1274400000	1227700000	1627000000
Q9WVL0	Maleylacetoacetate isomerase	Gstz1	17	3872800000	3875300000	3099400000	3621300000	3282300000	3215200000	2693700000	3591000000	3683600000	3374300000	3732100000	3447200000	3219200000	3256300000	3399100000	3749800000
Q9Z2I0	LETM1 and EF-hand domain-containing protein 1, mitochondrial	Letm1	17	48896000	83568000	69626000	56186000	67461000	51684000	79457000	70739000	71061000	72055000	56366000	80395000	77169000	70834000	83218000	64391000
A0A0A0MQA5	Tubulin alpha-4A chain	Tuba4a	16	40122000	67030000	78186000	75080000	82313000	61660000	140630000	67409000	61898000	68885000	71759000	70746000	74075000	63312000	79693000	57794000
A0A0R4J0I1	Serine protease inhibitor A3K	Serpina3k	16	26212000	33718000	54399000	46111000	170230000	74260000	98944000	130300000	69739000	58547000	61782000	80560000	92312000	91927000	157770000	88651000
B1AU25	Apoptosis-inducing factor 1, mitochondrial	Aifm1	16	37566000	60889000	64867000	56157000	61018000	48464000	77129000	45039000	57376000	70602000	55457000	59311000	64278000	66612000	66917000	42784000
B2RS76	carboxypeptidase B1 (Tissue)	Cpb1	16	108000000	716420	548940	6035400	693290	25703000	865364	7786100	2639300	13020000	845111	766673	8748300	37074000	649718	752936
D3YUM1	NADH dehydrogenase [ubiquinone] flavoprotein 1, mitochondrial	Ndufv1	16	47696000	79846000	109810000	107720000	86781000	98592000	66108000	97927000	83555000	103150000	66550000	124430000	100400000	68512000	99060000	88997000
E9Q616	AHNAK nucleoprotein (desmoyokin)	Ahnak	16	110650000	89983000	84020000	99389000	93911000	123030000	65633000	102560000	61258000	69598000	84859000	77420000	92397000	98400000	79500000	98969000
O08795-2	Glucosidase 2 subunit beta	Prkcsh	16	223920000	185500000	191480000	158130000	192840000	215590000	165860000	187390000	170990000	160130000	206180000	170030000	148290000	166920000	180520000	167950000
P00688	Pancreatic alpha-amylase	Amy2	16	253910000	4488200	809843	8740900	788762	113590000	865364	30012000	1634000	49780000	845111	652370	37741000	286730000	649718	752936
P08249	Malate dehydrogenase, mitochondrial	Mdh2	16	3490000000	3235100000	2621700000	3393700000	3285000000	4496400000	2766300000	3649400000	3321800000	2958400000	3489000000	3333000000	3505700000	3375100000	3858200000	4790800000
P12970	60S ribosomal protein L7a	Rpl7a	16	173730000	108540000	109950000	108980000	137770000	128320000	121430000	148550000	108690000	97043000	126190000	109160000	100410000	105810000	160650000	146630000
P14148	60S ribosomal protein L7	Rpl7	16	116260000	126170000	116520000	98927000	143040000	108380000	135070000	113490000	102720000	110240000	97598000	131660000	124490000	93815000	147760000	144430000
P21107-2	Tropomyosin alpha-3 chain	Tpm3-rs7	16	424690000	353640000	344400000	319750000	356090000	449940000	317660000	342030000	335280000	327640000	415060000	361670000	348080000	395370000	336560000	382700000
P23953	Carboxylesterase 1C	Ces1c	16	274630000	247050000	282660000	251110000	249530000	313480000	257480000	321040000	235090000	229470000	276100000	307410000	245780000	228140000	273620000	386490000
P32261	Antithrombin-III	Serpinc1	16	79015000	72249000	107680000	93089000	82471000	100210000	103080000	97293000	91117000	116990000	85900000	108910000	96142000	93672000	99701000	92160000
P35700	Peroxiredoxin-1	Prdx1	16	6595100000	5962000000	5411100000	5897900000	5733600000	6323400000	5346000000	6221100000	5978600000	5872500000	6553600000	5681600000	6120000000	5683100000	5871300000	6332700000
P47791-2	Glutathione reductase, mitochondrial	Gsr	16	303950000	261020000	242380000	260890000	264590000	285690000	243070000	303130000	197130000	181140000	235100000	207760000	212310000	200620000	213680000	256080000
P70699	Lysosomal alpha-glucosidase	Gaa	16	33687000	47445000	36125000	33067000	51948000	43107000	36539000	45769000	39264000	34950000	45481000	45299000	46399000	49643000	55533000	47785000
P80313	T-complex protein 1 subunit eta	Cct7	16	57354000	68647000	82616000	78166000	84756000	58318000	81824000	72301000	73363000	83288000	60827000	76965000	78880000	69002000	80070000	54795000
P80317	T-complex protein 1 subunit zeta	Cct6a	16	36794000	55797000	86862000	65850000	70460000	59498000	81050000	73825000	69055000	80175000	63584000	76769000	66126000	64900000	70979000	57514000
Q63880-2	Carboxylesterase 3A	Ces3a	16	607330000	927410000	1086100000	789540000	2471800000	1325700000	1187200000	2079000000	1247000000	835160000	1350600000	1666500000	1775900000	1114600000	2704400000	1721800000
Q64442	Sorbitol dehydrogenase	Sord	16	4175900000	4687500000	4105700000	4588800000	4430200000	3929000000	4072500000	4645300000	5039000000	4156900000	4957000000	4574800000	4759500000	4242500000	4465100000	4279200000
Q6NSR8	Probable aminopeptidase NPEPL1	Npepl1	16	75751000	75215000	74976000	73083000	72128000	74143000	62012000	78866000	70555000	64630000	79651000	78833000	68435000	69508000	73505000	93524000
Q80W22	Threonine synthase-like 2	Thnsl2	16	45782000	59451000	55657000	79421000	67343000	43053000	63601000	70946000	74383000	79942000	77037000	63387000	64215000	77027000	66688000	55465000
Q8BG05	Heterogeneous nuclear ribonucleoprotein A3	Hnrnpa3	16	180890000	188540000	221360000	180560000	212760000	154120000	193840000	184310000	198730000	196420000	217760000	245880000	207680000	205150000	247590000	248510000
Q8BI84	Melanoma inhibitory activity protein 3	Mia3	16	103010000	126160000	128710000	90737000	123290000	105370000	113550000	79289000	89071000	92750000	103550000	112120000	107570000	102920000	108520000	115080000
Q8C483	Serine--tRNA ligase, cytoplasmic	Sars	16	50319000	51642000	69639000	63843000	72108000	75040000	63231000	75287000	69038000	64340000	67793000	69282000	67460000	69665000	68084000	77037000
Q8CFA2	Aminomethyltransferase, mitochondrial	Amt	16	157200000	138030000	128430000	117620000	134680000	163710000	115160000	149780000	139620000	114590000	150670000	141090000	128760000	133960000	132090000	188350000
Q8CI51	PDZ and LIM domain protein 5	Pdlim5	16	54330000	58251000	53391000	50289000	57883000	58005000	55160000	53389000	47144000	48709000	64077000	51264000	51324000	54035000	55870000	52033000
Q8JZK9	Hydroxymethylglutaryl-CoA synthase, cytoplasmic	Hmgcs1	16	44718000	76069000	68370000	52303000	56444000	33771000	56098000	58283000	67246000	51100000	78300000	62625000	53321000	65596000	53079000	32267000
Q8K0E8	Fibrinogen beta chain;Fibrinopeptide B;Fibrinogen beta chain	Fgb	16	46117000	61464000	63928000	54662000	52958000	45124000	48556000	44823000	43026000	48301000	45396000	51399000	45875000	41451000	43928000	40985000
Q8K1R3	Polyribonucleotide nucleotidyltransferase 1, mitochondrial	Pnpt1	16	26030000	17050000	23911000	22509000	23782000	29683000	25667000	24444000	26319000	22457000	26651000	23026000	24628000	27848000	25924000	22915000
Q8R016	Bleomycin hydrolase	Blmh	16	235520000	202830000	187120000	203970000	188130000	183970000	165730000	213110000	212380000	184420000	244180000	196940000	178580000	192590000	181440000	216260000
Q8R0F9	SEC14-like protein 4	Sec14l4	16	26018000	31723000	43912000	33247000	42600000	34068000	47756000	35934000	33429000	39228000	30663000	43671000	36490000	34254000	39687000	30034000
Q8R1G2	Carboxymethylenebutenolidase homolog	Cmbl	16	655230000	765440000	629050000	662980000	584920000	460200000	568850000	582700000	709330000	602460000	700930000	610270000	559760000	597780000	531350000	498860000
Q8VC97	Beta-ureidopropionase	Upb1	16	230410000	227040000	261120000	223800000	215940000	219590000	187320000	228810000	271510000	157450000	231990000	228570000	276520000	282200000	233410000	227660000
Q91WG0	Acylcarnitine hydrolase	Ces2c	16	226880000	419850000	297690000	424210000	342970000	146460000	375720000	334180000	453860000	473460000	501130000	298320000	462450000	478840000	376360000	175120000
Q91YP0	L-2-hydroxyglutarate dehydrogenase, mitochondrial	L2hgdh	16	54781000	55303000	53822000	47065000	53316000	51875000	50459000	54736000	56935000	55409000	56443000	58993000	54446000	51650000	53855000	60820000
Q91Z53	Glyoxylate reductase/hydroxypyruvate reductase	Grhpr	16	437540000	551000000	509420000	507460000	594110000	444470000	479110000	639670000	541680000	512080000	469370000	575290000	571700000	496990000	613180000	372200000
Q99LB2	Dehydrogenase/reductase SDR family member 4	Dhrs4	16	350520000	419020000	278210000	242530000	290830000	240690000	231870000	240170000	255840000	253880000	254190000	291530000	232810000	225320000	283780000	238760000
Q9CQ62	2,4-dienoyl-CoA reductase, mitochondrial	Decr1	16	1146000000	1508700000	1301700000	1407700000	1508400000	1228600000	1204600000	1533000000	1512400000	1395700000	1499000000	1605700000	1429600000	1460500000	1588000000	1497400000
Q9CVB6	Actin-related protein 2/3 complex subunit 2	Arpc2	16	77935000	62537000	70647000	67034000	70716000	76378000	65666000	58114000	68534000	73191000	78281000	67382000	77293000	80236000	66901000	64387000
Q9DBH5	Vesicular integral-membrane protein VIP36	Lman2	16	203810000	173380000	174410000	181580000	188880000	201170000	167130000	190760000	169760000	175560000	211750000	162490000	172310000	169820000	162010000	178640000
Q9DBK0	Acyl-coenzyme A thioesterase 12	Acot12	16	55113000	64029000	60026000	49015000	60156000	44772000	54583000	55696000	59185000	50282000	51020000	62479000	55065000	61264000	57237000	38267000
Q9DCU9	4-hydroxy-2-oxoglutarate aldolase, mitochondrial	Hoga1	16	843520000	957070000	760330000	821110000	806300000	954640000	785750000	968070000	949870000	753320000	972010000	918860000	1026200000	968140000	908470000	1149300000
Q9JHW2	Omega-amidase NIT2	Nit2	16	559840000	488040000	535830000	605870000	598400000	577560000	484910000	710490000	622110000	573520000	612680000	609930000	573970000	559990000	630500000	670510000
Q9QYG0	Protein NDRG2	Ndrg2	16	85511000	90916000	133770000	106680000	109770000	85681000	161420000	104290000	124060000	131230000	77972000	106580000	105640000	97179000	116220000	81870000
Q9R1P4	Proteasome subunit alpha type-1	Psma1	16	198220000	177560000	171100000	182030000	189390000	187490000	167840000	196620000	187780000	173180000	204050000	169630000	183080000	188270000	175440000	198410000
Q9WUA2	Phenylalanine--tRNA ligase beta subunit	Farsb	16	19579000	40314000	49450000	49922000	52521000	35259000	42438000	45068000	44073000	45311000	38381000	45014000	48205000	41789000	57419000	45847000
Q9Z2I9	Succinyl-CoA ligase [ADP-forming] subunit beta, mitochondrial	Sucla2	16	46296000	63129000	63384000	73183000	55549000	61075000	108420000	84678000	82955000	49509000	77779000	50594000	78558000	55432000	67889000	105010000
A0A0R4J038	Kininogen-1;Kininogen-1 heavy chain;Bradykinin;Kininogen-1 light chain	Kng1	15	102880000	72974000	80295000	89955000	74266000	115680000	68075000	81175000	84536000	81270000	86975000	84082000	81029000	74557000	81881000	79278000
B7FAV1	Filamin-A	Flna	15	10896000	11430000	11587000	10817000	10803000	16526000	10491000	10782000	7878900	9937000	10270000	9113800	9920700	13104000	7689700	8628100
E9Q3X0	Major vault protein	Mvp	15	18278000	28848000	22642000	19226000	21584000	8508600	21132000	20035000	22103000	24943000	13919000	19488000	19314000	19136000	21538000	20658000
E9Q4G8	CD166 antigen	Alcam	15	119700000	89855000	91227000	95818000	93681000	136730000	78460000	107170000	87237000	80140000	105570000	105410000	91400000	87565000	84643000	137410000
E9QNL5	Sulfotransferase	Sult1a1	15	87822000	65385000	85095000	99736000	81666000	86129000	167390000	70894000	71506000	87795000	69908000	68312000	65874000	80635000	84932000	104370000
G3UXZ5	Proteasome activator complex subunit 1	Psme1	15	353730000	314700000	266430000	274090000	218100000	242360000	225090000	267540000	261420000	270460000	305870000	220370000	238180000	274880000	247330000	265330000
G3X9Y6	Aldo-keto reductase family 1, member C19	Akr1c19	15	177040000	201460000	169350000	149010000	176900000	172980000	174350000	173010000	215560000	190530000	185860000	179690000	232760000	227570000	195240000	194710000
O35286	Pre-mRNA-splicing factor ATP-dependent RNA helicase DHX15	Dhx15	15	23449000	22683000	27813000	24824000	27705000	26825000	26747000	23733000	25745000	26599000	23679000	27454000	31199000	30177000	29426000	33195000
O54782	Epididymis-specific alpha-mannosidase	Man2b2	15	28877000	30204000	25760000	24686000	32794000	32234000	26615000	30260000	31137000	24184000	36221000	33184000	29395000	36217000	31613000	27378000
P12710	Fatty acid-binding protein, liver	Fabp1	15	26612000000	44519000000	37480000000	41003000000	40202000000	45305000000	30629000000	44780000000	42990000000	41259000000	41273000000	49886000000	43200000000	40201000000	44422000000	41697000000
P14206	40S ribosomal protein SA	Rpsa	15	701950000	694040000	689790000	764810000	873890000	846820000	599270000	841500000	664880000	716380000	714070000	828210000	762720000	702710000	814680000	964560000
P19157	Glutathione S-transferase P 1;Glutathione S-transferase P 2	Gstp1;Gstp2	15	4348600000	3754800000	4133600000	3917200000	4066900000	6480600000	3877400000	4743500000	4143500000	3297200000	5255600000	4435300000	4281000000	4727500000	5343900000	7915500000
P24527	Leukotriene A-4 hydrolase	Lta4h	15	24626000	27879000	40770000	32911000	33587000	31156000	37642000	31078000	35830000	41918000	30080000	36844000	36194000	32228000	32557000	23085000
P27659	60S ribosomal protein L3	Rpl3	15	164780000	132150000	124850000	96956000	140810000	122080000	122330000	126680000	117600000	100320000	117370000	113760000	113750000	112420000	123880000	150310000
P35486	Pyruvate dehydrogenase E1 component subunit alpha, somatic form, mitochondrial	Pdha1	15	57767000	111960000	123810000	120850000	137330000	95030000	122760000	135790000	122280000	156010000	96395000	119350000	138570000	129360000	140030000	96510000
P62141	Serine/threonine-protein phosphatase PP1-beta catalytic subunit	Ppp1cb	15	137030000	118970000	108990000	108600000	110550000	144990000	104220000	121090000	109920000	108510000	122910000	114960000	111550000	114660000	106210000	159230000
P62702	40S ribosomal protein S4, X isoform;40S ribosomal protein S4	Rps4x;Gm15013	15	315620000	218200000	202400000	216710000	247560000	281620000	238520000	279410000	241410000	193680000	234610000	207670000	224550000	239900000	295020000	285460000
P62908	40S ribosomal protein S3	Rps3	15	435500000	382040000	378370000	387890000	443150000	446320000	342940000	410750000	400770000	404610000	379850000	442420000	443130000	394510000	475190000	458380000
P67778	Prohibitin	Phb	15	63224000	140060000	208070000	203980000	182690000	157110000	147840000	139570000	135100000	197670000	119090000	202390000	172870000	119350000	157920000	83172000
P70296	Phosphatidylethanolamine-binding protein 1;Hippocampal cholinergic neurostimulating peptide	Pebp1	15	1340000000	1765400000	1283500000	1455400000	1039300000	1052800000	974810000	1308200000	1542900000	1383700000	1452600000	1303900000	1215900000	1286900000	1086900000	1072700000
P80315	T-complex protein 1 subunit delta	Cct4	15	40705000	58377000	79005000	61589000	72395000	58514000	78514000	55426000	71755000	80513000	52948000	72364000	68087000	63240000	75562000	44696000
Q00623	Apolipoprotein A-I;Proapolipoprotein A-I;Truncated apolipoprotein A-I	Apoa1	15	872120000	927560000	964080000	839450000	1125800000	1161200000	1107400000	1051500000	710520000	824290000	1161000000	963050000	985320000	979690000	989420000	791100000
Q19LI2	Alpha-1B-glycoprotein	A1bg	15	239050000	82966000	75899000	114210000	16794000	100090000	16250000	34914000	71668000	235850000	11205000	80947000	21966000	23087000	7096700	135490000
Q571F8	Glutaminase liver isoform, mitochondrial	Gls2	15	29132000	26256000	33031000	27932000	32259000	32994000	50133000	26544000	34169000	32374000	21650000	35170000	33035000	25521000	35566000	41638000
Q5SUR0	Phosphoribosylformylglycinamidine synthase	Pfas	15	28542000	19832000	16871000	15805000	18719000	25059000	13850000	17114000	17481000	16339000	17621000	16044000	17612000	17044000	17977000	23339000
Q60737	Casein kinase II subunit alpha	Csnk2a1	15	47944000	58961000	48592000	49131000	49772000	45876000	47244000	46548000	46450000	48901000	50044000	45058000	45480000	47931000	44338000	47275000
Q61425	Hydroxyacyl-coenzyme A dehydrogenase, mitochondrial	Hadh	15	1828900000	2113500000	1632100000	2028000000	1747200000	1948300000	1560200000	1953400000	1869700000	1676800000	1996700000	1972400000	1978700000	1975900000	1864300000	2458100000
Q62261	Spectrin beta chain, non-erythrocytic 1	Sptbn1	15	17912000	18991000	17667000	17145000	16532000	16972000	16176000	12967000	13572000	19584000	15195000	19121000	18773000	17104000	14463000	18037000
Q6P6M7	O-phosphoseryl-tRNA(Sec) selenium transferase	Sepsecs	15	59831000	53989000	56133000	53515000	46086000	57958000	47596000	59494000	54066000	49391000	59869000	57781000	53388000	52285000	52449000	65550000
Q8BH95	Enoyl-CoA hydratase, mitochondrial	Echs1	15	1310200000	1093100000	1040100000	1117800000	936460000	1116600000	1011600000	1164500000	1174200000	1114800000	1318300000	1155700000	1081900000	1176300000	1080300000	1127100000
Q8CG76	Aflatoxin B1 aldehyde reductase member 2	Akr7a2	15	421430000	389760000	304250000	336650000	256140000	272580000	282840000	334910000	337650000	324910000	230030000	286510000	309500000	299130000	291460000	264510000
Q8VCA8	Secernin-2	Scrn2	15	168500000	168780000	146330000	166120000	135960000	133990000	124150000	156100000	159420000	136540000	167660000	154130000	133040000	136760000	150270000	181020000
Q8VDN2	Sodium/potassium-transporting ATPase subunit alpha-1	Atp1a1	15	16556000	15355000	21862000	20506000	19979000	18833000	38882000	15604000	18721000	25310000	18538000	20200000	24196000	23004000	20261000	14433000
Q91V76	Ester hydrolase C11orf54 homolog		15	736320000	1082000000	812540000	840320000	759270000	607990000	698280000	845430000	948600000	819260000	938170000	776180000	743250000	792350000	743750000	589400000
Q91WT7	3-alpha-hydroxysteroid dehydrogenase type 1	Akr1c14	15	114670000	105970000	146280000	152290000	128900000	90469000	156040000	148030000	130620000	147100000	111890000	134980000	138770000	149510000	131640000	149270000
Q91WU5	Arsenite methyltransferase	As3mt	15	46575000	45305000	52377000	42094000	43730000	38398000	49267000	47615000	52678000	54144000	40044000	47761000	48885000	48797000	56561000	41657000
Q99K67	Alpha-aminoadipic semialdehyde synthase, mitochondrial;Lysine ketoglutarate reductase;Saccharopine dehydrogenase	Aass	15	4884900	8810500	5884100	11331000	9936500	5806900	48669000	5542900	8873900	7700800	8285300	6472200	8680100	10933000	5963600	15952000
Q99L13	3-hydroxyisobutyrate dehydrogenase, mitochondrial	Hibadh	15	795050000	647210000	611030000	759600000	657460000	808400000	709420000	837840000	766840000	620000000	592520000	692250000	769870000	755620000	706470000	887330000
Q99N42	Thymidine phosphorylase	Tymp	15	18630000	24787000	25063000	18897000	28306000	12803000	20024000	15924000	22715000	22531000	17327000	24584000	23531000	31063000	23606000	19227000
Q9CPU0	Lactoylglutathione lyase	Glo1	15	2435400000	3225100000	2619500000	2606400000	2766600000	2390700000	2266700000	2833100000	2865900000	2410200000	2847100000	2861500000	2525400000	2723700000	3055700000	2802600000
Q9CZ13	Cytochrome b-c1 complex subunit 1, mitochondrial	Uqcrc1	15	286550000	317700000	333830000	352230000	318860000	309620000	317470000	250810000	370710000	402660000	288880000	325200000	365750000	358480000	374870000	239410000
Q9CZ30	Obg-like ATPase 1	Ola1	15	158360000	171430000	134400000	159220000	159910000	162870000	136050000	165360000	165570000	154600000	196500000	144430000	171520000	171820000	169740000	164970000
Q9D051	Pyruvate dehydrogenase E1 component subunit beta, mitochondrial	Pdhb	15	77462000	144760000	172750000	173620000	195520000	123340000	161380000	174330000	185530000	211490000	142980000	185080000	189240000	186210000	205860000	124720000
Q9D379	Epoxide hydrolase 1	Ephx1	15	72912000	97046000	79620000	61254000	99944000	45604000	110740000	52582000	70584000	103420000	56979000	65062000	69641000	73630000	72429000	35782000
Q9DB29	Isoamyl acetate-hydrolyzing esterase 1 homolog	Iah1	15	328840000	230580000	265830000	314300000	246250000	357810000	248450000	298500000	301680000	250250000	267830000	275050000	269780000	283410000	303020000	481640000
Q9DBB8	Trans-1,2-dihydrobenzene-1,2-diol dehydrogenase	Dhdh	15	233310000	234960000	247280000	249270000	210400000	192990000	212070000	250530000	277790000	253230000	216560000	249470000	242220000	233710000	252520000	235890000
Q9ESX5	H/ACA ribonucleoprotein complex subunit 4	Dkc1	15	50621000	47357000	42237000	49265000	53284000	61014000	40046000	50397000	44659000	47891000	45809000	53057000	54764000	47805000	51165000	66895000
Q9JLV1	BAG family molecular chaperone regulator 3	Bag3	15	35653000	46153000	39239000	31918000	27603000	25438000	26761000	25355000	35759000	35923000	33212000	34804000	33034000	28045000	27874000	28713000
Q9JMD3	PCTP-like protein	Stard10	15	311570000	226420000	164920000	168570000	182570000	151680000	171880000	137370000	171330000	176440000	182230000	185440000	180530000	177540000	193570000	184900000
Q9QWR8	Alpha-N-acetylgalactosaminidase	Naga	15	37567000	32587000	34805000	30952000	43437000	33813000	33493000	35506000	36682000	31235000	42311000	36427000	46637000	49466000	48862000	46851000
Q9QXX4	Calcium-binding mitochondrial carrier protein Aralar2	Slc25a13	15	9741300	19487000	30989000	38186000	24346000	17406000	48740000	19020000	24741000	27535000	16568000	30029000	25478000	19356000	30776000	11634000
Q9R092	17-beta-hydroxysteroid dehydrogenase type 6	Hsd17b6	15	168420000	204820000	214410000	195710000	390370000	242620000	217970000	233510000	201840000	196340000	193350000	181770000	201030000	200610000	230470000	236720000
Q9WTP7	GTP:AMP phosphotransferase AK3, mitochondrial	Ak3	15	85446000	101450000	116080000	109070000	113080000	102260000	146940000	98594000	114390000	117850000	92813000	107530000	111970000	117220000	120490000	106410000
Q9Z1Z2	Serine-threonine kinase receptor-associated protein	Strap	15	87389000	95152000	101830000	88006000	107360000	117700000	90647000	95763000	100210000	92589000	109860000	105130000	97648000	106660000	103380000	109090000
A0A075B5P6	Immunoglobulin mu chain C region	Ighm	14	162240000	41773000	87200000	99545000	53839000	108460000	21986000	27435000	36047000	73324000	41994000	39591000	17442000	14171000	16186000	35758000
A0A0R4J018	Thiopurine S-methyltransferase	Tpmt	14	72513000	79104000	52377000	49167000	55564000	59414000	51309000	74429000	64641000	53946000	48087000	47411000	67487000	58313000	65554000	53384000
A0A0R4J0X5	Alpha-1-antitrypsin 1-3;Alpha-1-antitrypsin 1-1	Serpina1c;Serpina1a	14	163790000	147830000	272120000	196080000	219640000	227650000	251360000	212580000	201830000	225300000	211630000	231890000	175740000	176240000	213600000	174970000
A0A1C7CYV0	Plastin-3	Pls3	14	29353000	33258000	40059000	36727000	29869000	23598000	44633000	31337000	27097000	38710000	32225000	35027000	27822000	30872000	29358000	31427000
A0A1L1STE6	Isocitrate dehydrogenase [NAD] subunit alpha, mitochondrial	Idh3a	14	136780000	115670000	151590000	131130000	175820000	182870000	161370000	184640000	139350000	140760000	157480000	160050000	174640000	176380000	163420000	164580000
A2ARD6	Kynureninase	Kynu	14	130600000	79852000	73157000	91004000	68995000	66789000	78574000	48415000	84848000	121520000	114340000	73565000	84993000	107170000	76171000	86752000
O70400	PDZ and LIM domain protein 1	Pdlim1	14	70803000	65732000	74775000	68623000	59593000	76640000	62195000	66205000	67070000	60824000	66705000	68576000	57722000	60606000	64353000	61394000
O88325	Alpha-N-acetylglucosaminidase	Naglu	14	30338000	32910000	35884000	32811000	38868000	33168000	31921000	38918000	36795000	31785000	41211000	35203000	39494000	38676000	42269000	35340000
P11352	Glutathione peroxidase 1;Glutathione peroxidase	Gpx1	14	4731100000	4876100000	4666800000	5096600000	4839600000	5455200000	4216000000	6047600000	5429000000	4620600000	5559900000	4832400000	5078000000	5049500000	5516200000	5816500000
P11499	Heat shock protein HSP 90-beta	Hsp90ab1	14	49490000	58559000	93663000	93255000	82685000	57068000	161460000	69461000	78681000	96020000	61925000	72457000	67018000	70451000	97289000	55315000
P17751-2	Triosephosphate isomerase	Tpi1	14	4498500000	3749300000	3393500000	3642100000	3283700000	4382000000	3140500000	3800900000	3943000000	3370900000	4092000000	3674500000	3796800000	3815800000	3419100000	5075600000
P18242	Cathepsin D	Ctsd	14	409230000	329470000	414640000	418650000	483210000	433920000	367220000	415600000	425070000	420960000	452650000	503600000	516480000	476720000	531800000	496650000
P19221	Prothrombin;Activation peptide fragment 1;Activation peptide fragment 2;Thrombin light chain;Thrombin heavy chain;Prothrombin	F2	14	56509000	52304000	55351000	51295000	44804000	57391000	44587000	59146000	50790000	50443000	53021000	52564000	42267000	44080000	44411000	50745000
P20060	Beta-hexosaminidase subunit beta	Hexb	14	51018000	40761000	37203000	42683000	46532000	50081000	36134000	40597000	36212000	37823000	53118000	40825000	42296000	46598000	45381000	46265000
P30115	Glutathione S-transferase A3	Gsta3	14	12272000000	11129000000	9582000000	10141000000	6491100000	7333900000	8131900000	7574400000	10495000000	9129300000	9397400000	7180100000	7945800000	9355200000	8155700000	8023800000
P51881	ADP/ATP translocase 2;ADP/ATP translocase 2, N-terminally processed	Slc25a5	14	42652000	95720000	69794000	96242000	90242000	52122000	341400000	53225000	79214000	86843000	78120000	55373000	83369000	83414000	85376000	70177000
P53810	Phosphatidylinositol transfer protein alpha isoform	Pitpna	14	83298000	78158000	74661000	66592000	69495000	85665000	57346000	76316000	71161000	64387000	81046000	71714000	70118000	69510000	70547000	82313000
P63085	Mitogen-activated protein kinase 1	Mapk1	14	30485000	30576000	26162000	26074000	24618000	22631000	20254000	27572000	25037000	24264000	21706000	22569000	20581000	20356000	26633000	25185000
P70697	Uroporphyrinogen decarboxylase	Urod	14	67827000	74277000	92076000	85287000	94671000	92311000	81744000	105890000	93305000	76676000	92987000	95613000	91063000	93879000	98595000	96566000
P97429	Annexin A4;Annexin	Anxa4	14	47056000	48020000	69296000	53936000	64967000	67010000	46793000	65908000	48815000	44515000	40143000	56073000	41203000	38117000	59974000	51184000
Q543K9	Purine nucleoside phosphorylase	Pnp	14	693460000	556900000	603860000	696850000	666560000	676720000	577810000	707720000	677640000	597810000	748550000	658420000	655550000	657050000	726390000	778820000
Q60932-2	Voltage-dependent anion-selective channel protein 1	Vdac1	14	124050000	164280000	205600000	257210000	187840000	188150000	147090000	192180000	171460000	195210000	140900000	254320000	205640000	132040000	234180000	184220000
Q61598	Rab GDP dissociation inhibitor beta	Gdi2	14	28867000	37163000	65635000	56611000	51297000	32331000	77814000	41840000	51616000	64719000	39302000	49156000	55510000	47997000	59690000	40965000
Q61646	Haptoglobin;Haptoglobin alpha chain;Haptoglobin beta chain	Hp	14	107850000	184300000	106040000	84159000	101670000	141450000	95231000	134690000	72611000	89809000	142040000	75181000	110950000	131030000	95813000	133190000
Q6P3A8	2-oxoisovalerate dehydrogenase subunit beta, mitochondrial	Bckdhb	14	96496000	83694000	88324000	108150000	106310000	116880000	105420000	135870000	116350000	112340000	120920000	128450000	118550000	121180000	115760000	136250000
Q80WJ7	Protein LYRIC	Mtdh	14	55026000	64925000	55069000	52341000	62725000	57945000	47089000	50541000	39607000	47452000	56933000	60318000	56632000	51836000	59185000	56669000
Q8BG32	26S proteasome non-ATPase regulatory subunit 11	Psmd11	14	21767000	29097000	37947000	33536000	32631000	27029000	38900000	35610000	33197000	39128000	26470000	31376000	32254000	32252000	37119000	21295000
Q8BGD9	Eukaryotic translation initiation factor 4B	Eif4b	14	47293000	52431000	46851000	42439000	50378000	52618000	45914000	49025000	48354000	45543000	54197000	52919000	46429000	46784000	52421000	57686000
Q8BVI4	Dihydropteridine reductase	Qdpr	14	2776800000	2040400000	1818400000	2332200000	1583400000	2190500000	1622600000	1895500000	2343900000	2121200000	2190400000	1765600000	1874800000	1931800000	1594600000	2112800000
Q8BWM0	Prostaglandin E synthase 2;Prostaglandin E synthase 2 truncated form	Ptges2	14	62689000	75928000	72048000	73672000	77496000	84403000	74068000	87195000	70711000	71361000	88059000	79639000	85208000	73396000	80813000	99817000
Q8CAY6	Acetyl-CoA acetyltransferase, cytosolic	Acat2	14	2429000000	2152300000	1833600000	2204600000	1802800000	2070600000	1538000000	2187800000	2123900000	2007300000	2018500000	1961700000	1900200000	1841400000	1826000000	2240400000
Q8K169	UDP-glucuronosyltransferase 2B17	Ugt2b5;Ugt2b17	14	116850000	188570000	333340000	270330000	357780000	147460000	376850000	223270000	312300000	347840000	246380000	290340000	323680000	318690000	381590000	181980000
Q8R164	Valacyclovir hydrolase	Bphl	14	119820000	117100000	142340000	158150000	114800000	84953000	164680000	117830000	152280000	171690000	101390000	124050000	125000000	138460000	137950000	83739000
Q8R4N0	Citrate lyase subunit beta-like protein, mitochondrial	Clybl	14	145760000	170510000	126010000	128180000	118670000	149680000	119950000	142760000	137080000	115600000	146510000	136450000	137010000	144440000	131610000	178270000
Q8VBT2	L-serine dehydratase/L-threonine deaminase	Sds	14	263460000	150140000	164970000	162550000	189970000	323540000	188970000	207910000	217180000	173040000	173990000	194430000	234680000	231200000	194470000	589400000
Q8VCQ8	Caldesmon 1	Cald1	14	32142000	30162000	39074000	26118000	27888000	39356000	33229000	26690000	26660000	25603000	39758000	28901000	27123000	30773000	24925000	30060000
Q91VR5	ATP-dependent RNA helicase DDX1	Ddx1	14	23645000	22479000	23238000	23410000	26840000	26772000	23181000	25250000	19356000	25667000	22197000	27888000	22833000	22464000	28844000	24942000
Q91WD5	NADH dehydrogenase [ubiquinone] iron-sulfur protein 2, mitochondrial	Ndufs2	14	114920000	143470000	204710000	218370000	178050000	157580000	158580000	164730000	164100000	206160000	133190000	183270000	219300000	149640000	181560000	141530000
Q91X77	Cytochrome P450 2C50	Cyp2c50	14	7405600	20174000	28454000	25679000	50496000	11360000	65166000	22736000	27374000	19126000	33801000	26621000	25046000	21746000	33700000	5784600
Q99J77	Sialic acid synthase	Nans	14	46037000	46885000	44210000	39410000	45576000	54626000	35632000	50161000	49444000	34664000	54226000	47334000	46381000	51193000	48140000	56943000
Q9CPV4	Glyoxalase domain-containing protein 4	Glod4	14	240490000	232230000	130520000	155060000	118120000	103030000	120030000	128440000	138170000	162080000	113920000	116940000	140750000	147180000	138040000	131470000
Q9CZ44	NSFL1 cofactor p47	Nsfl1c	14	59327000	62107000	63718000	68333000	67054000	65284000	56239000	72256000	61674000	60417000	68343000	68854000	60948000	58617000	70269000	63861000
Q9D2G2	Dihydrolipoyllysine-residue succinyltransferase component of 2-oxoglutarate dehydrogenase complex, mitochondrial	Dlst	14	667560000	834420000	575220000	661850000	573310000	569440000	545780000	584530000	581430000	687720000	551070000	632030000	610770000	647240000	583820000	776480000
Q9D8E6	60S ribosomal protein L4	Rpl4	14	176150000	169730000	169080000	141150000	187700000	146940000	194510000	159110000	151390000	155400000	139150000	180340000	163870000	135760000	189730000	187830000
Q9D8U8	Sorting nexin-5	Snx5	14	50426000	57576000	57484000	49216000	56440000	58756000	56426000	48931000	50487000	48175000	60845000	56956000	53091000	51534000	53055000	52984000
Q9DCN2	NADH-cytochrome b5 reductase 3;NADH-cytochrome b5 reductase 3 membrane-bound form;NADH-cytochrome b5 reductase 3 soluble form;NADH-cytochrome b5 reductase	Cyb5r3	14	290410000	247390000	192300000	245260000	215370000	142020000	229520000	210200000	228290000	322370000	139530000	186880000	244330000	219280000	232120000	126200000
Q9DCQ2	Putative L-aspartate dehydrogenase	Aspdh	14	103250000	105080000	81748000	68478000	72640000	84154000	77481000	56076000	88259000	91116000	61478000	77933000	83673000	81567000	83930000	90089000
Q9DCX2	ATP synthase subunit d, mitochondrial	Atp5h	14	539130000	654440000	662060000	567840000	695990000	668180000	716960000	668270000	677750000	658680000	604400000	674440000	721740000	647940000	677640000	665260000
Q9EP89	Serine beta-lactamase-like protein LACTB, mitochondrial	Lactb	14	62512000	92820000	83831000	78091000	84415000	76662000	81575000	74003000	93828000	83002000	77397000	88320000	83384000	74312000	87237000	85865000
Q9JK81	UPF0160 protein MYG1, mitochondrial	Myg1	14	64069000	47767000	50728000	41876000	38735000	53878000	38856000	51290000	50926000	43198000	50629000	51875000	47373000	49075000	41038000	53613000
Q9QYR7	Acyl-coenzyme A thioesterase 3	Acot3	14	103940000	134760000	98042000	136830000	64882000	44319000	80182000	67946000	106640000	142740000	71887000	110750000	79724000	104780000	57733000	49778000
Q9R1P3	Proteasome subunit beta type-2	Psmb2	14	519600000	586120000	494850000	589500000	540490000	469490000	473760000	639490000	550990000	529390000	598290000	574440000	591150000	533990000	554830000	622700000
Q9Z0S1	3(2),5-bisphosphate nucleotidase 1	Bpnt1	14	122860000	114070000	110370000	122460000	106690000	113320000	102730000	123220000	129390000	112800000	123680000	108210000	110510000	113980000	119600000	121050000
Q9Z2I8	Succinyl-CoA ligase [GDP-forming] subunit beta, mitochondrial	Suclg2	14	90543000	111850000	121960000	114300000	116610000	122980000	156940000	107020000	108360000	124020000	97178000	109270000	117250000	114970000	119370000	112680000
Q9Z2U1	Proteasome subunit alpha type-5	Psma5	14	436580000	445290000	428790000	473090000	439260000	468390000	405770000	517490000	475900000	449500000	546710000	451770000	434980000	473970000	493160000	459970000
A0A075B5P3	Immunoglobulin gamma-2B chain C region	Ighg2b;Igh-3	13	590870000	174590000	640750000	1561300000	372050000	677630000	206530000	237770000	143040000	269980000	179130000	245090000	90083000	79381000	281800000	111770000
A0A075B5P5	Immunoglobulin gamma-3 chain C region	Ighg3	13	57045000	1087600000	327060000	31470000	56923000	81191000	27065000	16567000	223440000	380290000	45127000	380530000	10995000	39616000	10337000	42712000
A0A0J9YU79	Ketohexokinase	Khk	13	1296600000	1819800000	1404200000	1660500000	1382200000	970290000	1200300000	1574600000	1536800000	1500700000	1435300000	1347500000	1511800000	1486200000	1349700000	1313200000
A0A0R4J0B2	Phospholipase B-like 1;Phospholipase B-like 1 chain A;Phospholipase B-like 1 chain B;Phospholipase B-like 1 chain C	Plbd1	13	38020000	35672000	38618000	45315000	45314000	39325000	37890000	47755000	40978000	33812000	56055000	42881000	55628000	54645000	61328000	44047000
A2AKK5	Acyl-coenzyme A amino acid N-acyltransferase 1	Acnat1	13	53383000	52775000	66764000	60240000	68570000	54998000	57244000	69625000	61987000	50408000	68393000	60794000	47548000	51737000	61084000	54437000
A2AS89	Agmatinase, mitochondrial	Agmat	13	148110000	265160000	253850000	156140000	219050000	205180000	246040000	210350000	212020000	224060000	186790000	252630000	213290000	192400000	210670000	185830000
B7ZCF1	26S protease regulatory subunit 6A	Psmc3	13	18792000	28004000	28038000	22257000	26870000	26263000	31887000	24987000	24356000	32340000	21592000	23151000	26743000	24920000	28809000	27359000
B7ZNJ1	Fibronectin;Anastellin	Fn1	13	25226000	35003000	33363000	27197000	32255000	29550000	26034000	29822000	27254000	26483000	31451000	30471000	27214000	26676000	27341000	28856000
E9PV24-2	Fibrinogen alpha chain;Fibrinopeptide A;Fibrinogen alpha chain	Fga	13	49928000	76108000	71563000	62661000	63048000	51685000	66338000	51112000	48236000	62367000	54253000	59696000	48471000	47749000	47392000	39091000
G3X977	Inter-alpha-trypsin inhibitor heavy chain H2	Itih2	13	37066000	31370000	38884000	35740000	33496000	40547000	31573000	31723000	31688000	37227000	30042000	37938000	31056000	28431000	29211000	40347000
H3BKH6	S-formylglutathione hydrolase	Esd	13	259700000	249590000	298040000	241460000	255280000	180430000	263710000	247230000	302520000	302960000	217770000	261240000	253550000	243820000	232970000	179330000
H3BL34	Carboxylic ester hydrolase;Carboxylesterase 1E	Ces1e	13	53605000	73226000	69301000	49638000	43129000	38340000	47948000	46820000	62490000	52090000	49339000	53760000	46107000	50826000	40532000	33366000
J3QN31	Adenylosuccinate synthetase isozyme 1	Adssl1	13	65419000	39674000	39483000	48558000	59229000	82121000	38047000	42963000	41815000	42316000	36198000	38954000	47475000	37712000	29602000	39569000
O35887	Calumenin	Calu	13	96284000	76557000	88305000	95700000	101690000	116300000	81225000	97761000	91173000	85693000	104330000	92620000	86124000	88051000	101470000	102140000
O55234	Proteasome subunit beta type-5	Psmb5	13	78870000	110640000	90842000	74958000	111010000	105140000	103460000	100930000	108520000	88955000	96817000	110110000	104190000	89442000	94601000	102110000
P01029	Complement C4-B;Complement C4 beta chain;Complement C4 alpha chain;C4a anaphylatoxin;Complement C4 gamma chain	C4b	13	16408000	23482000	22206000	23604000	23488000	13536000	16664000	15406000	18131000	21985000	15701000	19801000	17663000	16591000	18600000	12034000
P06728	Apolipoprotein A-IV	Apoa4	13	52309000	51033000	59351000	55167000	70789000	74984000	79563000	78674000	52934000	53543000	51843000	61275000	59735000	70066000	58857000	52484000
P08226	Apolipoprotein E	Apoe	13	446610000	544020000	477820000	415040000	495320000	511500000	467930000	505720000	474340000	473930000	531680000	522730000	479080000	491780000	515850000	484980000
P09528	Ferritin heavy chain;Ferritin heavy chain, N-terminally processed	Fth1	13	446110000	416450000	467700000	317760000	282670000	291260000	215140000	318940000	397560000	275770000	353850000	475170000	172960000	227230000	278800000	312980000
P10649	Glutathione S-transferase Mu 1	Gstm1	13	2307500000	2284600000	2408100000	2138000000	2018200000	1816600000	2397800000	1589200000	2674000000	2627900000	2017800000	2220600000	2222100000	2415000000	2149600000	1699100000
P17742	Peptidyl-prolyl cis-trans isomerase A;Peptidyl-prolyl cis-trans isomerase A, N-terminally processed	Ppia	13	5251200000	4778700000	4144500000	5094500000	4022900000	7023400000	4062400000	5637800000	5008200000	4638700000	5107400000	4918900000	5528500000	4967100000	5006300000	6419900000
P24369	Peptidyl-prolyl cis-trans isomerase B	Ppib	13	1449200000	1085700000	1077300000	1171000000	1348800000	1760400000	1000300000	1351800000	1154500000	1025800000	1345500000	1135800000	1217000000	1159100000	1283700000	1433100000
P38060	Hydroxymethylglutaryl-CoA lyase, mitochondrial	Hmgcl	13	415360000	699880000	516470000	514740000	535620000	479380000	459450000	523140000	536420000	467630000	536260000	610290000	503740000	503320000	540940000	583410000
P40936	Indolethylamine N-methyltransferase	Inmt	13	510060000	509130000	379530000	401500000	505850000	326410000	523440000	465730000	506870000	440500000	310260000	368420000	698270000	586740000	612680000	550330000
P47199	Quinone oxidoreductase	Cryz	13	167450000	144190000	230790000	214080000	192480000	120290000	198060000	252720000	257500000	235720000	152100000	187410000	177690000	202650000	191920000	92356000
P47962	60S ribosomal protein L5	Rpl5	13	248400000	194060000	192710000	211800000	199900000	255510000	178970000	198800000	214540000	193410000	215050000	209390000	230930000	212780000	231380000	234200000
P49443	Protein phosphatase 1A	Ppm1a	13	76380000	88417000	76163000	71268000	69347000	69993000	68029000	78043000	86725000	72595000	84415000	77079000	65491000	68117000	58992000	60595000
P50427	Steryl-sulfatase	Sts	13	34878000	35991000	31925000	27606000	44299000	46485000	31716000	37138000	28063000	26238000	37155000	45293000	37427000	35983000	44806000	52065000
P51150	Ras-related protein Rab-7a	Rab7a	13	187870000	177540000	180780000	197490000	206010000	222340000	174730000	254260000	181840000	170200000	225280000	199320000	178300000	174450000	235370000	249590000
P52196	Thiosulfate sulfurtransferase	Tst	13	2171500000	1785800000	1342000000	1683500000	1341000000	2008300000	1356000000	1940100000	1745600000	1380600000	1518600000	1519200000	1635900000	1579400000	1500500000	1797400000
Q03311	Cholinesterase	Bche	13	52121000	57726000	42557000	45850000	34913000	31364000	36498000	32876000	37161000	49680000	34202000	40916000	37308000	32862000	34313000	40366000
Q11136	Xaa-Pro dipeptidase	Pepd	13	65022000	62693000	53266000	54572000	46080000	77707000	49419000	66733000	58023000	55997000	61191000	59565000	53046000	56322000	53834000	69811000
Q3TMH2	Secernin-3	Scrn3	13	99556000	96829000	82678000	93142000	94871000	88978000	75545000	100660000	91589000	89885000	101100000	94208000	78760000	84765000	98609000	114690000
Q3UEP4	UDP glucuronosyltransferase 2 family, polypeptide B36	Ugt2b36	13	29073000	41590000	69218000	61536000	69762000	30865000	79445000	41221000	60485000	70068000	47978000	58784000	56445000	69008000	58807000	30982000
Q3UXD9	Peroxisomal trans-2-enoyl-CoA reductase	Pecr	13	295860000	364030000	357500000	317590000	361750000	333020000	369580000	408150000	470040000	296650000	347310000	395820000	339430000	328800000	368590000	387420000
Q4LDG0	Bile acyl-CoA synthetase	Slc27a5	13	18002000	26160000	26376000	31341000	30704000	17379000	68143000	16370000	25271000	27951000	24024000	23798000	28440000	29346000	26818000	24234000
Q6ZWN5	40S ribosomal protein S9	Rps9	13	244590000	174450000	188560000	187390000	224610000	228920000	217690000	221870000	201340000	186250000	184340000	189260000	206130000	185990000	239360000	233130000
Q80XN0	D-beta-hydroxybutyrate dehydrogenase, mitochondrial	Bdh1	13	195740000	365940000	217510000	219340000	332250000	234100000	285200000	252750000	187630000	312300000	252150000	349660000	283880000	311500000	192320000	252680000
Q8BK48	Pyrethroid hydrolase Ces2e	Ces2e	13	361670000	582720000	404760000	444620000	385780000	234360000	296720000	334600000	422150000	455460000	386940000	355230000	314920000	313570000	255600000	228450000
Q8BP48	Methionine aminopeptidase 1	Metap1	13	43980000	46318000	37760000	43260000	39681000	39938000	29937000	45413000	37874000	40793000	42301000	46576000	39903000	38060000	44418000	50951000
Q8K0D5	Elongation factor G, mitochondrial	Gfm1	13	14138000	17407000	23297000	28150000	27013000	21016000	24883000	20951000	30243000	26211000	20280000	26345000	27214000	30330000	35580000	24753000
Q8K183	Pyridoxal kinase	Pdxk	13	225410000	242530000	205200000	221010000	226110000	243380000	204740000	240570000	246270000	194700000	259640000	227150000	234890000	239920000	230900000	274860000
Q8QZR1	Tyrosine aminotransferase	Tat	13	2590300	3519000	4143700	3528100	3040900	26885000	6874300	30446000	10046000	3530900	8468900	7768200	10059000	8864500	16396000	45736000
Q8QZS1	3-hydroxyisobutyryl-CoA hydrolase, mitochondrial	Hibch	13	35744000	45374000	83331000	69689000	68414000	38806000	94485000	53374000	75632000	82706000	42850000	69196000	65609000	72831000	79586000	42467000
Q8R238	Serine dehydratase-like	Sdsl	13	26692000	14287000	16210000	16464000	16023000	31098000	15278000	23466000	17870000	17184000	16363000	15647000	11909000	18587000	16736000	32431000
Q91X52	L-xylulose reductase	Dcxr	13	216130000	164680000	140020000	154260000	111850000	128120000	129550000	137540000	167750000	134870000	131930000	123870000	124070000	132620000	109640000	111590000
Q91XE0	Glycine N-acyltransferase	Glyat	13	34886000	45360000	50365000	43304000	50925000	29238000	100680000	32106000	48616000	54832000	47891000	44991000	50062000	57395000	58012000	36674000
Q922B2	Aspartate--tRNA ligase, cytoplasmic	Dars	13	35839000	22691000	34543000	28396000	30437000	19477000	36123000	27558000	32594000	36243000	27859000	28747000	28647000	29809000	33203000	25122000
Q924B0	Inositol monophosphatase 1	Impa1	13	96622000	81589000	80173000	73898000	77107000	88050000	70220000	80736000	83707000	65535000	88096000	73558000	76248000	77910000	71914000	79409000
Q99J39-2	Malonyl-CoA decarboxylase, mitochondrial	Mlycd	13	44343000	32679000	37901000	37484000	38501000	34606000	39684000	43489000	41524000	39011000	24223000	32419000	37606000	37847000	36605000	28609000
Q99N15	3-hydroxyacyl-CoA dehydrogenase type-2	Hsd17b10	13	94618000	131660000	108000000	127530000	146670000	105320000	179480000	135390000	130540000	130150000	123520000	131870000	148560000	126000000	160130000	145770000
Q9CPX4	Ferritin;Ferritin light chain 1;Ferritin light chain 2	Ftl1;Ftl2	13	2011100000	1223700000	1537000000	1291800000	750890000	1431300000	691690000	1087200000	1367900000	1069000000	1336300000	1570800000	688270000	806110000	863000000	1329300000
Q9CXW3	Calcyclin-binding protein	Cacybp	13	85631000	78466000	79690000	85535000	78123000	87215000	79927000	97915000	79913000	79924000	91972000	81441000	68321000	77218000	92985000	90034000
Q9D8N0	Elongation factor 1-gamma	Eef1g	13	27204000	38302000	48342000	37142000	50094000	39527000	61423000	42958000	43802000	44928000	33336000	43565000	44750000	47458000	47266000	39234000
Q9DCM2	Glutathione S-transferase kappa 1	Gstk1	13	420450000	403570000	327240000	366140000	295970000	333530000	335090000	439750000	389940000	291830000	373610000	307580000	267910000	309950000	332370000	413710000
Q9JLI6	Selenocysteine lyase	Scly	13	100090000	99965000	113590000	102940000	102210000	78915000	88221000	85253000	94754000	107880000	99535000	101310000	94836000	98262000	89743000	90449000
Q9WU19	Hydroxyacid oxidase 1	Hao1	13	33778000	40325000	44611000	29460000	60182000	50182000	35391000	53408000	37052000	32056000	39730000	51066000	32039000	37523000	59909000	67036000
Q9Z0N1	Eukaryotic translation initiation factor 2 subunit 3, X-linked;Eukaryotic translation initiation factor 2 subunit 3, Y-linked	Eif2s3x;Eif2s3y	13	47692000	50509000	64399000	48085000	73234000	57406000	62196000	56284000	64113000	63333000	57241000	66246000	64957000	63434000	60062000	50404000
Q9Z1N5	Spliceosome RNA helicase Ddx39b	Ddx39b	13	1144900000	1130600000	1287200000	1257100000	1225500000	1158500000	1260800000	1209200000	1229900000	1194100000	1263400000	1378500000	1292900000	1294800000	1506500000	1435400000
Q9Z2U0	Proteasome subunit alpha type-7	Psma7	13	418180000	405140000	388130000	390920000	417190000	400290000	368730000	447930000	420310000	382040000	474180000	438530000	380280000	410100000	420820000	446790000
A0A0J9YUD8	High mobility group protein B1	Hmgb1	12	672120000	490590000	548990000	443690000	477780000	655200000	484340000	502190000	496380000	411910000	593870000	505870000	496090000	526450000	475790000	608210000
A0A0R4J1Y7	Thioredoxin domain-containing protein 5	Txndc5	12	115730000	128140000	145890000	118910000	126160000	100720000	122110000	139150000	112010000	117510000	73458000	118320000	112220000	95539000	123850000	97904000
A0A498WGD8	Thioredoxin-like protein 1	Txnl1	12	132160000	137870000	128870000	116710000	143450000	137740000	114040000	133250000	134350000	122960000	144180000	138010000	126580000	143930000	132080000	136060000
A2ADY9	Protein DDI1 homolog 2	Ddi2	12	99841000	98948000	101640000	103390000	116700000	84879000	85053000	97977000	92064000	105510000	92152000	110670000	83328000	86723000	109960000	85269000
B1AT82	Phosphoribosyl pyrophosphate synthase-associated protein 1	Prpsap1	12	53203000	57640000	51202000	53506000	49375000	44841000	45308000	59121000	51820000	55682000	48662000	53207000	50242000	46207000	58239000	56243000
G3UZP7	H-2 class I histocompatibility antigen, D-B alpha chain;H-2 class I histocompatibility antigen, L-D alpha chain	H2-D1;H2-L	12	344520000	274030000	339920000	290390000	248510000	295530000	243910000	272670000	268130000	296120000	377670000	221030000	272750000	325590000	261480000	268120000
G5E8T9	Hydroxyacylglutathione hydrolase, mitochondrial	Hagh	12	590230000	510650000	469470000	484360000	530480000	619040000	481440000	511990000	562780000	402820000	637770000	511820000	461630000	514210000	531810000	693040000
O09061	Proteasome subunit beta type-1	Psmb1	12	285170000	275920000	261180000	280980000	262020000	277590000	249670000	302950000	282470000	258450000	329230000	278940000	274260000	294080000	270090000	318920000
O35386	Phytanoyl-CoA dioxygenase, peroxisomal	Phyh	12	101750000	89312000	73437000	66705000	88336000	85724000	67957000	80377000	78355000	57483000	72789000	77850000	81732000	75357000	82267000	82127000
O55125	Protein NipSnap homolog 1	Nipsnap1	12	523450000	535660000	582930000	612600000	594860000	512070000	573410000	579530000	627830000	628550000	663460000	612190000	589520000	570930000	614910000	645040000
O88958	Glucosamine-6-phosphate isomerase 1	Gnpda1	12	98689000	75120000	69423000	92917000	61539000	70693000	53281000	68198000	82810000	80615000	75519000	66343000	63216000	58933000	55595000	72682000
P09671	Superoxide dismutase [Mn], mitochondrial	Sod2	12	1369100000	1638600000	1372200000	1524600000	1562900000	1576000000	1367200000	1695300000	1609300000	1450400000	1778400000	1572700000	1552400000	1736600000	1661500000	1831700000
P10605	Cathepsin B;Cathepsin B light chain;Cathepsin B heavy chain	Ctsb	12	827100000	706380000	607230000	572240000	691570000	792230000	579230000	556000000	666000000	559630000	868120000	672810000	724630000	764640000	664320000	772590000
P23780	Beta-galactosidase	Glb1	12	290860000	257510000	253580000	260870000	323150000	334780000	256340000	312840000	271650000	240640000	343780000	297920000	340390000	364080000	363590000	318140000
P26040	Ezrin	Ezr	12	20091000	22841000	24052000	25445000	26272000	33115000	24130000	24655000	22455000	18956000	25123000	24339000	24196000	26923000	24677000	24218000
P40124	Adenylyl cyclase-associated protein 1;Adenylyl cyclase-associated protein	Cap1	12	20094000	17968000	25995000	20243000	19275000	17236000	25131000	15219000	18164000	21432000	17707000	18985000	16662000	19121000	19333000	17655000
P45700	Mannosyl-oligosaccharide 1,2-alpha-mannosidase IA	Man1a1	12	20049000	21842000	22746000	21160000	19137000	19996000	17038000	20617000	17311000	21170000	19482000	20855000	16740000	17912000	19278000	25483000
P46638	Ras-related protein Rab-11B;Ras-related protein Rab-11A	Rab11b;Rab11a	12	261360000	282550000	247200000	264830000	294090000	309110000	243870000	294850000	251670000	264980000	332310000	289120000	264360000	267520000	293400000	306610000
P49722	Proteasome subunit alpha type-2	Psma2	12	330080000	326650000	321100000	337280000	339660000	345600000	297640000	383720000	333400000	309450000	393570000	347890000	340380000	352340000	349050000	371120000
P51859	Hepatoma-derived growth factor	Hdgf	12	121960000	110270000	100290000	97441000	113060000	135350000	97150000	106040000	107530000	97878000	133030000	120220000	97023000	121720000	119370000	140800000
P63005	Platelet-activating factor acetylhydrolase IB subunit alpha	Pafah1b1	12	45796000	41680000	39217000	36620000	41138000	46374000	37536000	40440000	39798000	37634000	46237000	37807000	36007000	36071000	39256000	41323000
P70195	Proteasome subunit beta type-7	Psmb7	12	63576000	80951000	70796000	74248000	80769000	77369000	72884000	76936000	80139000	72643000	89119000	79409000	79797000	77819000	77762000	90129000
P84078	ADP-ribosylation factor 1;ADP-ribosylation factor 3;ADP-ribosylation factor 2	Arf1;Arf3;Arf2	12	459910000	418940000	364360000	374120000	478230000	439680000	377500000	409650000	376180000	359290000	464050000	438440000	376380000	365900000	433320000	538330000
P97372	Proteasome activator complex subunit 2	Psme2	12	161400000	151860000	146750000	136400000	120290000	106400000	127830000	133820000	129610000	138710000	145590000	140410000	126300000	125630000	120670000	138680000
P97742	Carnitine O-palmitoyltransferase 1, liver isoform	Cpt1a	12	9969800	18741000	14792000	15424000	16560000	11938000	32660000	12822000	12460000	14500000	14449000	15268000	17079000	12598000	17041000	16704000
P99029-2	Peroxiredoxin-5, mitochondrial	Prdx5	12	1133200000	1134800000	951580000	1242900000	1018800000	1149800000	920410000	1284800000	1137200000	1045200000	991900000	1134500000	1188300000	1084300000	1250900000	1354800000
Q04447	Creatine kinase B-type	Ckb	12	157030000	92231000	92865000	111660000	92105000	165550000	69200000	114950000	72467000	83129000	108370000	89134000	83930000	121890000	88998000	162010000
Q3UER8	Fibrinogen gamma chain	Fgg	12	68132000	103100000	97108000	77754000	88279000	72102000	84060000	65442000	70114000	75257000	73493000	74348000	66410000	59400000	67677000	58504000
Q5FW57	Glycine N-acyltransferase-like protein	Gm4952	12	25773000	48174000	56952000	49592000	58720000	20454000	69702000	43588000	45968000	53626000	39519000	56652000	53726000	51911000	54768000	25279000
Q6ZWX6	Eukaryotic translation initiation factor 2 subunit 1	Eif2s1	12	41177000	46651000	55904000	48446000	59252000	55218000	57190000	42363000	54018000	65213000	55183000	52382000	60911000	57418000	57886000	43178000
Q8BGT5	Alanine aminotransferase 2	Gpt2	12	20665000	22155000	25930000	27224000	17880000	21191000	30786000	25987000	30604000	34474000	19103000	20963000	28234000	25185000	23422000	24170000
Q8BT60	Copine-3	Cpne3	12	67094000	64869000	62509000	67279000	65521000	69574000	61932000	79893000	70675000	59891000	68628000	72681000	58975000	51799000	56670000	74791000
Q8JZN5	Acyl-CoA dehydrogenase family member 9, mitochondrial	Acad9	12	16725000	15724000	16444000	16927000	19464000	15476000	23910000	13833000	18467000	23548000	16984000	20797000	16847000	22519000	15991000	18797000
Q8K154	UDP glucuronosyltransferase 2 family, polypeptide B34	Ugt2b34	12	31766000	40701000	69704000	67042000	71593000	38368000	101530000	44021000	53642000	68953000	41627000	61096000	58592000	59636000	71480000	43742000
Q8K157	Aldose 1-epimerase	Galm	12	507960000	441930000	332660000	348480000	320790000	298170000	290680000	338280000	390020000	332350000	324660000	305920000	305150000	336900000	314180000	347700000
Q8R0F8	Acylpyruvase FAHD1, mitochondrial	Fahd1	12	325160000	309490000	258840000	309190000	292820000	400640000	265830000	346260000	327800000	257570000	347950000	362480000	318030000	306630000	355420000	534200000
Q8R5C5	Beta-centractin	Actr1b	12	51231000	57803000	59697000	62337000	59956000	54725000	52125000	59125000	50976000	54824000	57118000	63799000	48867000	50000000	57392000	64471000
Q8VEK3-2	Heterogeneous nuclear ribonucleoprotein U	Hnrnpu	12	63729000	58380000	62758000	47756000	60342000	56924000	58481000	47138000	47022000	53951000	52378000	48507000	47990000	52230000	52923000	56680000
Q91Z98	Chitinase-like protein 4	Chil4	12	11708000	319780000	18565000	136340000	6567900	10627000	3980500	6373000	29017000	47890000	3601100	33236000	8658900	3901700	10117000	12251000
Q921M3	Splicing factor 3B subunit 3	Sf3b3	12	15748000	14589000	20697000	19809000	20635000	14896000	17099000	22157000	17207000	23121000	16049000	23357000	18025000	19432000	23057000	20325000
Q99KJ8	Dynactin subunit 2	Dctn2	12	42569000	48087000	45826000	45019000	50578000	46798000	43867000	48412000	40253000	49778000	45519000	45429000	47932000	44790000	50344000	41792000
Q99KQ4	Nicotinamide phosphoribosyltransferase	Nampt	12	17826000	16100000	18331000	15437000	21887000	20704000	16329000	21586000	19296000	15004000	3895300	19104000	16815000	20298000	16184000	22677000
Q9CQ65	S-methyl-5-thioadenosine phosphorylase	Mtap	12	94450000	104310000	89582000	91834000	89763000	98626000	75915000	90944000	96588000	94231000	97992000	96336000	99655000	91366000	87688000	123070000
Q9CQA3	Succinate dehydrogenase [ubiquinone] iron-sulfur subunit, mitochondrial	Sdhb	12	684960000	700590000	699420000	746680000	779440000	1008100000	761650000	841570000	815780000	806920000	772600000	752460000	853540000	845580000	802790000	808360000
Q9CZ42-2	ATP-dependent (S)-NAD(P)H-hydrate dehydratase	Carkd	12	93892000	85331000	85915000	88723000	91823000	110130000	80732000	100330000	95142000	84867000	102380000	87914000	99939000	98845000	91158000	100070000
Q9CZU6	Citrate synthase, mitochondrial;Citrate synthase	Cs;Csl	12	44883000	56752000	46708000	50320000	52011000	28458000	85365000	34327000	45974000	53676000	37472000	46910000	55142000	53010000	52544000	32424000
Q9D7N9	Adipocyte plasma membrane-associated protein	Apmap	12	89281000	86871000	66002000	72759000	68049000	66114000	59913000	67512000	60451000	64670000	71913000	67918000	56459000	59594000	59935000	66060000
Q9DCN1	Peroxisomal NADH pyrophosphatase NUDT12	Nudt12	12	39320000	49682000	55636000	43606000	46660000	33012000	47703000	44258000	57567000	42152000	41854000	48116000	45486000	49925000	46090000	33086000
Q9DCS3	Trans-2-enoyl-CoA reductase, mitochondrial	Mecr	12	18827000	19597000	23611000	22920000	25280000	20853000	27366000	22523000	28858000	23689000	20838000	26625000	26813000	24803000	30854000	23379000
Q9NYQ2	Hydroxyacid oxidase 2	Hao2	12	145020000	115430000	88825000	109030000	30417000	76958000	28952000	39015000	73829000	90491000	42061000	73990000	40005000	52979000	13794000	97206000
Q9QYJ0	DnaJ homolog subfamily A member 2	Dnaja2	12	58229000	66277000	58082000	55360000	57875000	58701000	57001000	58014000	61244000	63158000	63817000	63315000	58800000	57994000	62179000	67004000
Q9R0Q6	Actin-related protein 2/3 complex subunit 1A	Arpc1a	12	49645000	51334000	55606000	50992000	66814000	45322000	49174000	53666000	51442000	59289000	52451000	57156000	64749000	56104000	54661000	48768000
Q9R1P0	Proteasome subunit alpha type-4;Proteasome subunit alpha type	Psma4	12	450850000	396900000	405100000	393380000	386790000	379780000	357510000	409000000	412210000	364720000	501680000	389010000	374630000	387620000	334700000	399330000
Q9R1P1	Proteasome subunit beta type-3	Psmb3	12	329810000	326370000	286740000	317170000	347700000	301210000	273890000	365060000	295410000	315250000	374380000	322970000	315440000	324380000	339380000	367450000
Q9Z2Y8	Proline synthase co-transcribed bacterial homolog protein	Prosc	12	303540000	252420000	232180000	241970000	234680000	296950000	199120000	259140000	273390000	238580000	284710000	252370000	255060000	250990000	242980000	288160000
A0A0R4J259	Heterogeneous nuclear ribonucleoprotein Q	Syncrip	11	19075000	20717000	32559000	24976000	24007000	24681000	29215000	27196000	28020000	29556000	21667000	31514000	25512000	23702000	28264000	19532000
A0A1B0GS58	Glutaredoxin-3	Glrx3	11	70099000	78192000	68508000	67095000	65899000	49489000	56928000	69367000	72964000	73961000	52582000	62101000	61706000	57346000	65073000	56060000
A0A3B2WBL1	Ribosomal protein;60S ribosomal protein L10a	Rpl10a	11	237280000	162970000	132140000	146750000	154890000	167210000	125510000	112280000	133420000	149960000	150610000	131930000	156530000	144510000	143180000	142680000
A0A494BAI5	Ferrochelatase;Ferrochelatase, mitochondrial	Fech	11	42453000	55962000	98309000	81284000	98986000	87226000	97434000	74700000	92780000	90245000	93726000	92697000	83956000	95411000	100330000	78581000
A0A498WGK2	Asparagine--tRNA ligase, cytoplasmic	Nars	11	17951000	17831000	25461000	20370000	24002000	16341000	24831000	20183000	22091000	22847000	17377000	22981000	21286000	19417000	26563000	33019000
B2RT14	UDP glucuronosyltransferase 1 family, polypeptide A5	Ugt1a5	11	50078000	88212000	83122000	118640000	75331000	43647000	87246000	74653000	108430000	153370000	83259000	93255000	109050000	117930000	97640000	52889000
B8JJM5	Complement factor B;Complement factor B Ba fragment;Complement factor B Bb fragment	Cfb;Gm20547	11	19183000	28136000	18401000	17493000	22514000	19857000	18164000	21864000	23222000	18559000	20928000	23153000	19781000	22483000	21668000	24296000
E9PV38	Carboxylic ester hydrolase	Ces2g	11	88085000	92350000	79414000	80032000	83062000	60407000	63169000	83330000	78453000	83790000	72272000	71385000	73464000	74410000	59091000	43697000
E9QMK9	UPF0317 protein C14orf159 homolog, mitochondrial	9030617O03Rik	11	12294000	14410000	18963000	17266000	16917000	9286400	20814000	13032000	20179000	20274000	11782000	16263000	16605000	17643000	13291000	10005000
F6YVP7	40S ribosomal protein S18	Gm10260;Rps18	11	493880000	467520000	423260000	432800000	507580000	539100000	370980000	446130000	427640000	476790000	458070000	472850000	490650000	480230000	541270000	517860000
F8VQ28	Paxillin	Pxn	11	19142000	19721000	17579000	20662000	21170000	22063000	18347000	18491000	18607000	16167000	18135000	21652000	19050000	19672000	17210000	19752000
G3UXL2	Ribose-phosphate pyrophosphokinase 1	Prps1l3;Prps1	11	199480000	198470000	174400000	188220000	176520000	168460000	146590000	204620000	190330000	202480000	183410000	192050000	177750000	167420000	162750000	201780000
H7BX88	Carnitine O-acetyltransferase	Crat	11	46826000	50936000	37448000	31772000	25523000	27504000	24795000	24160000	29931000	33515000	31114000	32632000	26196000	33779000	17858000	23444000
O08600	Endonuclease G, mitochondrial	Endog	11	147850000	103610000	113390000	152790000	151040000	193850000	106960000	171920000	127700000	136010000	143100000	134610000	149220000	130770000	138280000	227580000
O35215	D-dopachrome decarboxylase	Ddt	11	6022700000	4994200000	4753600000	5706400000	4543700000	6205700000	4587600000	5617800000	5970800000	4775300000	5582800000	5365200000	5161000000	5474900000	5133200000	5984600000
O35639	Annexin A3;Annexin	Anxa3	11	35232000	28855000	30514000	38871000	31752000	44824000	27033000	36566000	28210000	30317000	34280000	31573000	34001000	33811000	36960000	43804000
O70435	Proteasome subunit alpha type-3	Psma3	11	311060000	306560000	283540000	268540000	304660000	319120000	275680000	334050000	304590000	287920000	349300000	308300000	304680000	306920000	290130000	276560000
P00493	Hypoxanthine-guanine phosphoribosyltransferase	Hprt1	11	101550000	117800000	93107000	97752000	111520000	112090000	84529000	106880000	99135000	103440000	116840000	98624000	101370000	102390000	98718000	113600000
P00920	Carbonic anhydrase 2	Ca2	11	197710000	200540000	147210000	162990000	216630000	176190000	195580000	163810000	133480000	195380000	136550000	177530000	155100000	162260000	150760000	143680000
P10630	Eukaryotic initiation factor 4A-II;Eukaryotic initiation factor 4A-II, N-terminally processed	Eif4a2	11	53860000	69973000	97362000	88008000	83294000	60797000	117410000	79285000	99750000	94830000	68764000	76325000	94878000	89012000	113360000	67586000
P10711	Transcription elongation factor A protein 1	Tcea1	11	56233000	41631000	46334000	40404000	50092000	59594000	41767000	39680000	38879000	40165000	55892000	43492000	42743000	47640000	43727000	51347000
P12382	ATP-dependent 6-phosphofructokinase, liver type	Pfkl	11	21214000	20550000	27894000	20122000	14897000	12066000	19124000	18234000	22749000	16464000	22970000	12964000	10519000	12088000	17080000	20328000
P14152	Malate dehydrogenase, cytoplasmic	Mdh1	11	2242400000	1692200000	1730100000	2291200000	2046000000	2181200000	1646300000	2493400000	2292000000	2273800000	1546800000	1661000000	2233400000	2190200000	2063700000	1782600000
P14869	60S acidic ribosomal protein P0	Rplp0	11	220720000	188610000	225370000	220710000	233950000	182730000	201560000	216640000	218680000	242320000	151520000	227450000	233180000	198340000	267880000	186070000
P18760	Cofilin-1	Cfl1	11	203960000	212770000	264450000	202980000	261120000	251110000	244840000	221850000	238750000	235700000	261010000	267770000	237260000	239690000	240510000	240710000
P22907-2	Porphobilinogen deaminase	Hmbs	11	51313000	53191000	53144000	62308000	52003000	60327000	51442000	61196000	60463000	48735000	60850000	57951000	53535000	54736000	60794000	64080000
P24456	Cytochrome P450 2D10	Cyp2d10	11	24957000	34341000	42749000	42383000	55200000	27492000	102510000	37127000	36158000	46186000	34309000	43950000	43637000	39391000	50491000	34107000
P25444	40S ribosomal protein S2	Rps2	11	269930000	185950000	193960000	213770000	228270000	249790000	216020000	241140000	210400000	163540000	219460000	188920000	198930000	223030000	248240000	283170000
P35293	Ras-related protein Rab-18	Rab18	11	55333000	66910000	72782000	68616000	68938000	48083000	64082000	79185000	64843000	75380000	66018000	74934000	62383000	59180000	65351000	52268000
P42125	Enoyl-CoA delta isomerase 1, mitochondrial	Eci1	11	234550000	299800000	290910000	294300000	358840000	233610000	344440000	307630000	336600000	433270000	286260000	285960000	293010000	332980000	282250000	202050000
P42208	Septin-2	Septin2	11	67408000	59320000	60236000	64425000	69514000	73774000	51688000	65260000	56339000	55947000	67935000	63984000	61827000	62360000	62751000	74190000
P45376	Aldose reductase	Akr1b1;Akr1b3	11	110590000	53012000	36815000	36066000	37791000	53776000	34247000	38704000	40781000	36830000	52098000	34587000	55166000	45099000	34211000	65717000
P50171	Estradiol 17-beta-dehydrogenase 8	Hsd17b8;H2-Ke6	11	88074000	107780000	118840000	116710000	130910000	102330000	111230000	131520000	139130000	120970000	111390000	135870000	118470000	116140000	125980000	99122000
P52430	Serum paraoxonase/arylesterase 1	Pon1	11	155750000	161560000	242040000	272970000	314900000	159740000	288220000	292770000	267870000	301050000	233260000	283900000	248290000	218670000	309090000	150130000
P53994	Ras-related protein Rab-2A	Rab2a	11	81755000	80916000	78149000	80510000	82258000	74828000	76848000	97471000	76365000	75696000	74265000	80087000	72507000	61026000	87573000	76293000
P54728	UV excision repair protein RAD23 homolog B	Rad23b	11	64121000	62408000	59086000	46622000	55449000	47640000	52602000	53403000	59802000	47471000	48950000	53319000	50754000	53516000	53494000	40608000
P55302	Alpha-2-macroglobulin receptor-associated protein	Lrpap1	11	84667000	88445000	80837000	71415000	81228000	82937000	67677000	64131000	74396000	70264000	84324000	71439000	63758000	67664000	74566000	75499000
P56593	Cytochrome P450 2A12	Cyp2a12	11	5835400	10668000	4177800	16681000	9544300	997042	56457000	3214600	10024000	6359000	10298000	766673	8526400	9872600	4681400	6012500
P62242	40S ribosomal protein S8	Rps8	11	245540000	165740000	191820000	198290000	205930000	244900000	213220000	218570000	224370000	168700000	202240000	206660000	194050000	197600000	245830000	258080000
P62827	GTP-binding nuclear protein Ran	Ran;1700009N14Rik	11	265960000	195980000	179040000	170020000	192880000	228960000	208080000	219730000	190480000	159980000	211250000	184210000	171130000	195160000	179930000	237960000
P63101	14-3-3 protein zeta/delta	Ywhaz	11	382600000	349560000	385230000	351640000	380880000	427870000	356890000	351850000	347140000	364350000	392250000	403160000	391670000	388400000	396590000	389670000
P63330	Serine/threonine-protein phosphatase 2A catalytic subunit alpha isoform	Ppp2ca	11	183230000	171390000	173030000	172290000	160930000	184180000	131110000	183560000	164510000	160390000	189560000	161700000	146080000	163250000	160740000	187610000
P85094	Isochorismatase domain-containing protein 2A, mitochondrial	Isoc2a	11	764080000	720680000	596210000	726070000	750520000	827630000	658020000	913500000	740200000	687890000	685370000	809600000	771420000	725330000	879830000	1216300000
P97351	40S ribosomal protein S3a	Rps3a	11	339580000	330570000	275450000	278400000	327430000	345340000	259960000	313110000	286240000	302960000	296270000	295090000	320830000	313080000	346470000	344360000
P97501	Dimethylaniline monooxygenase [N-oxide-forming] 3	Fmo3	11	893126	2701800	7142100	19856000	22487000	4294800	59692000	21366000	15111000	12516000	13402000	11434000	13864000	18138000	18042000	24983000
Q03249	Galactose-1-phosphate uridylyltransferase	Galt	11	96810000	97378000	82901000	107330000	98666000	99309000	81193000	114700000	106940000	89426000	112480000	92902000	94401000	95039000	107260000	135700000
Q07797	Galectin-3-binding protein	Lgals3bp	11	89188000	64550000	79807000	68669000	70620000	86699000	57272000	70599000	59390000	58438000	84849000	66013000	62214000	61055000	63724000	95025000
Q08857	Platelet glycoprotein 4	Cd36	11	97751000	178470000	127290000	135800000	76646000	80911000	87843000	95324000	120090000	156350000	88035000	117560000	72970000	101480000	52046000	66568000
Q3U816	Oxidoreductase HTATIP2	Htatip2	11	65663000	69788000	56673000	57025000	49079000	52751000	47894000	58872000	62548000	51158000	60294000	53527000	51560000	50335000	51009000	62565000
Q3UJU9	Regulator of microtubule dynamics protein 3	Rmdn3	11	69426000	103360000	85136000	72557000	79766000	44411000	72912000	74893000	69943000	96345000	52240000	84290000	84156000	89158000	81765000	41107000
Q3UM45	Protein phosphatase 1 regulatory subunit 7	Ppp1r7	11	64162000	62221000	59042000	71765000	60583000	74740000	51756000	65685000	56295000	63703000	61158000	64241000	57858000	56797000	62986000	73629000
Q64669	NAD(P)H dehydrogenase [quinone] 1	Nqo1	11	82639000	87504000	53095000	47361000	38605000	46830000	41809000	46061000	64535000	55280000	58654000	53286000	48364000	46530000	36211000	52111000
Q6P8J7	Creatine kinase S-type, mitochondrial	Ckmt2	11	893126	822315	1195500	763642	74813000	24744000	865364	14497000	729584	1113500	845111	766673	183640000	1599200	649718	752936
Q80T06	Elongation factor 1-delta	Eef1d	11	170680000	196530000	217520000	176550000	255510000	253060000	226430000	202240000	223780000	223630000	175740000	235450000	224700000	205470000	240890000	239520000
Q80ZP8	Mesencephalic astrocyte-derived neurotrophic factor	Manf	11	109030000	82284000	84185000	78902000	118700000	132580000	83733000	105530000	89569000	67010000	109540000	93395000	88157000	83011000	119370000	129920000
Q8BGJ5	Polypyrimidine tract-binding protein 1	Ptbp1	11	24173000	29782000	24749000	28153000	30352000	26341000	29966000	26150000	24644000	25109000	26451000	30878000	25649000	25521000	34542000	32556000
Q8R084	UDP glucuronosyltransferase 2 family, polypeptide B1	Ugt2b1	11	10235000	16683000	25169000	19235000	23068000	12802000	47454000	15784000	24417000	21954000	21442000	20865000	22550000	24799000	30941000	16297000
Q8R3F5	Malonyl-CoA-acyl carrier protein transacylase, mitochondrial	Mcat	11	29805000	33137000	30808000	32450000	31157000	34573000	29506000	31562000	34099000	27524000	36071000	37396000	35355000	34097000	33521000	42845000
Q8R519	2-amino-3-carboxymuconate-6-semialdehyde decarboxylase	Acmsd	11	67191000	2004500	5143400	13820000	9958600	57661000	17548000	23123000	13298000	10409000	13704000	8576700	18634000	14872000	19972000	103780000
Q8VCI5	Peroxisomal biogenesis factor 19	Pex19	11	31861000	42424000	31439000	25179000	28301000	25795000	27621000	28043000	28903000	28595000	31229000	28381000	26750000	27906000	25305000	20845000
Q8VCR2	17-beta-hydroxysteroid dehydrogenase 13	Hsd17b13	11	86077000	92826000	62177000	63780000	77978000	92906000	80736000	69599000	62037000	92777000	54606000	62172000	80736000	74229000	54846000	68151000
Q91V41	Ras-related protein Rab-14	Rab14	11	157620000	134350000	129460000	131430000	141870000	123560000	130060000	156040000	138880000	114540000	133370000	123150000	117610000	115630000	146840000	130950000
Q91V64	Isochorismatase domain-containing protein 1	Isoc1	11	144000000	146880000	104650000	118010000	100280000	86021000	94488000	105040000	122620000	121580000	85000000	114800000	110540000	98690000	108690000	79453000
Q91VB8	Hemoglobin subunit alpha	haemaglobin alpha 2;Hba	11	12157000000	14271000000	12219000000	13769000000	15615000000	14939000000	17068000000	13887000000	9987100000	15386000000	12086000000	16501000000	13505000000	10912000000	13142000000	14613000000
Q91W64	Cytochrome P450 2C70	Cyp2c70	11	21750000	17540000	22564000	23744000	22508000	15081000	35159000	22775000	20660000	20396000	16593000	13926000	16682000	18590000	24027000	15687000
Q91XE4	N-acyl-aromatic-L-amino acid amidohydrolase (carboxylate-forming)	Acy3	11	462870000	518680000	432690000	471020000	428270000	384280000	367600000	427380000	467450000	385850000	463000000	447280000	377220000	405320000	404850000	407620000
Q91XF0	Pyridoxine-5-phosphate oxidase	Pnpo	11	229020000	230990000	210680000	197720000	194840000	226110000	196170000	234730000	219660000	192130000	244310000	206210000	175020000	227310000	214300000	239220000
Q91XH5	Sepiapterin reductase	Spr	11	334030000	237440000	208720000	229600000	205360000	287710000	204610000	195020000	221380000	197370000	230980000	238420000	259250000	215970000	269510000	357890000
Q923D2	Flavin reductase (NADPH)	Blvrb	11	272320000	383860000	315010000	287340000	317340000	224740000	271360000	267520000	333610000	282350000	319060000	314980000	301560000	303130000	351740000	262670000
Q924D0	Reticulon-4-interacting protein 1, mitochondrial	Rtn4ip1	11	17658000	28499000	23393000	19607000	24422000	17608000	22072000	23286000	23634000	28474000	19924000	24219000	25110000	22873000	25880000	19272000
Q99KR3	Beta-lactamase-like protein 2	Lactb2	11	207690000	217140000	186740000	207120000	200200000	182930000	182880000	204690000	249700000	182730000	229810000	185220000	219580000	211490000	210860000	189140000
Q99LF4	tRNA-splicing ligase RtcB homolog	Rtcb	11	24956000	21708000	30221000	22882000	31486000	23431000	25949000	28582000	26767000	24797000	23114000	29897000	22293000	23175000	28170000	22143000
Q99LX0	Protein deglycase DJ-1	Park7	11	581120000	587910000	482570000	532280000	483520000	471680000	422280000	569610000	534940000	525250000	468040000	520410000	472280000	509620000	457640000	447210000
Q99NF7	Protein phosphatase 1B	Ppm1b	11	70121000	76532000	60792000	61863000	62682000	55030000	56125000	59368000	68463000	63714000	64301000	60068000	57162000	62400000	56380000	53639000
Q99PG0	Arylacetamide deacetylase	Aadac	11	36312000	42659000	53533000	51389000	50042000	37616000	100090000	33410000	46669000	69436000	35564000	46823000	43274000	43895000	48405000	36056000
Q99PT1	Rho GDP-dissociation inhibitor 1	Arhgdia	11	628520000	431600000	444770000	472140000	465050000	640170000	418210000	491840000	446450000	398120000	534950000	480800000	482980000	500480000	464200000	701010000
Q9CRD0	OCIA domain-containing protein 1	Ociad1	11	86465000	116730000	100800000	85107000	96691000	103980000	94628000	111710000	94600000	103880000	102280000	116020000	104830000	92903000	103690000	103270000
Q9D0E1-2	Heterogeneous nuclear ribonucleoprotein M	Hnrnpm	11	28406000	35072000	30256000	23742000	35949000	26107000	31527000	24833000	20171000	21535000	28398000	20765000	24583000	20888000	18500000	21840000
Q9D404	3-oxoacyl-[acyl-carrier-protein] synthase, mitochondrial	Oxsm	11	26131000	28919000	33754000	30419000	27347000	21564000	27196000	32340000	30771000	28128000	26069000	31537000	29742000	27843000	29816000	21949000
Q9D6Y7-2	Mitochondrial peptide methionine sulfoxide reductase	Msra	11	757980000	753290000	668220000	703500000	635350000	730230000	604640000	693830000	788020000	656370000	809980000	678380000	672640000	698620000	623380000	691900000
Q9D7J9	Enoyl-CoA hydratase domain-containing protein 3, mitochondrial	Echdc3	11	448700000	397810000	386100000	458930000	398440000	447500000	364940000	429960000	443390000	480500000	403100000	481110000	399110000	381730000	398900000	493260000
Q9D9V3	Ethylmalonyl-CoA decarboxylase	Echdc1	11	45968000	52702000	56351000	60109000	44218000	37428000	53643000	47810000	58897000	67697000	44845000	53459000	50975000	53240000	53527000	34407000
Q9DBL1	Short/branched chain specific acyl-CoA dehydrogenase, mitochondrial	Acadsb	11	49467000	38123000	39919000	37092000	46415000	39575000	51446000	37608000	48511000	45700000	41149000	37494000	43412000	49484000	59663000	52871000
Q9DCG6	Phenazine biosynthesis-like domain-containing protein 1	Pbld1	11	602010000	628050000	565320000	611620000	584220000	507600000	483040000	632700000	645930000	528140000	642330000	582880000	534520000	582920000	555990000	562010000
Q9DCM0	Persulfide dioxygenase ETHE1, mitochondrial	Ethe1	11	632620000	391970000	405290000	601050000	448650000	619660000	524740000	582790000	639820000	431670000	583640000	436070000	516890000	576620000	530150000	769090000
Q9DCT1	1,5-anhydro-D-fructose reductase	Akr1e2;Akr1e1	11	103520000	114970000	94555000	110060000	87382000	85022000	79753000	102100000	106910000	93416000	95003000	89424000	91256000	90585000	84076000	89052000
Q9QUI0	Transforming protein RhoA	Rhoa	11	281660000	226280000	217140000	227010000	226790000	244800000	210050000	230650000	218300000	189380000	258360000	251970000	201470000	204700000	199190000	279250000
Q9QUM9	Proteasome subunit alpha type-6	Psma6	11	488910000	430570000	430350000	453640000	428270000	473560000	394290000	502600000	447240000	432670000	529160000	447790000	420390000	466500000	397860000	435850000
Q9QXT0	Protein canopy homolog 2	Cnpy2	11	323290000	287600000	260090000	251670000	264770000	305850000	250310000	266460000	262970000	224790000	301140000	261730000	229410000	246090000	269100000	272320000
Q9WV54	Acid ceramidase;Acid ceramidase subunit alpha;Acid ceramidase subunit beta	Asah1	11	105440000	111970000	104100000	90930000	114540000	126270000	92703000	118800000	109460000	91036000	139480000	123490000	134220000	113000000	134610000	168440000
Q9Z2Z6	Mitochondrial carnitine/acylcarnitine carrier protein	Slc25a20	11	12173000	22603000	20172000	21053000	25039000	13295000	28626000	24745000	22767000	25443000	17891000	24129000	21526000	19163000	28725000	18526000
A0A075B5P4	Immunoglobulin gamma-1 chain C region secreted form;Immunoglobulin gamma-1 chain C region, membrane-bound form	Ighg1	10	81168000	35789000	149010000	49218000	84186000	57862000	77890000	128230000	81400000	18869000	529100000	25627000	88442000	117250000	30825000	71102000
A0A087WRE5	U8 snoRNA-decapping enzyme	Nudt16	10	28547000	26733000	26581000	30350000	24757000	25370000	23569000	31278000	29441000	28787000	27612000	27752000	24055000	25686000	22849000	21271000
A0A0A0MQM0	Eukaryotic translation initiation factor 5A;Eukaryotic translation initiation factor 5A-1	Eif5a	10	348340000	336300000	376140000	341560000	368230000	383650000	350480000	338330000	394070000	323130000	340550000	371960000	372590000	359480000	369670000	383280000
A0A0J9YTY0	Septin-11	Septin11	10	34118000	24054000	29961000	24991000	31851000	38788000	24540000	26439000	28337000	23363000	33727000	24488000	27624000	27895000	26101000	33861000
A0A0R4J094	Fumarylacetoacetate hydrolase domain-containing protein 2A	Fahd2	10	106810000	137060000	132080000	137640000	134280000	143230000	120460000	152350000	173270000	138930000	144750000	150090000	143190000	145080000	135140000	128490000
A0A140T8J4	Heme-binding protein 1	Hebp1	10	542610000	511240000	452770000	435420000	377880000	351890000	419580000	506120000	498430000	414400000	396060000	417290000	388410000	402040000	380030000	326060000
A0A3B2WBH9	Tight junction protein ZO-2	Tjp2	10	14592000	15383000	15223000	13088000	13951000	14320000	17381000	13145000	12957000	13968000	18334000	14545000	13924000	17658000	14548000	11653000
A0JNY3	Gephyrin;Molybdopterin adenylyltransferase;Molybdopterin molybdenumtransferase	Gphn	10	22310000	28259000	26352000	27169000	23044000	15529000	24853000	22243000	19530000	30369000	21837000	28304000	25079000	22534000	20192000	16113000
D3YY36	Inhibitor of carbonic anhydrase	1300017J02Rik;Ica	10	18491000	20147000	24569000	16318000	24446000	23652000	22476000	25010000	21035000	21494000	19668000	25057000	22919000	19806000	24314000	21578000
D3Z3E8	Putative helicase MOV-10	Mov10	10	20503000	16232000	15430000	16592000	18460000	20215000	14247000	13058000	16014000	14050000	16317000	15472000	16991000	16594000	17289000	20017000
D3Z645	Vacuolar protein sorting-associated protein 29	Vps29	10	86376000	68425000	65480000	67431000	78897000	83644000	58571000	69731000	72077000	60644000	83896000	64512000	68541000	70737000	73954000	84820000
F8WID5	Tropomyosin alpha-1 chain	Tpm1	10	37680000	31739000	25992000	33555000	40194000	75983000	21614000	47889000	22262000	27819000	29865000	32018000	93828000	37253000	24179000	27950000
F8WJK8	Hsc70-interacting protein	St13	10	321610000	265180000	278170000	253190000	270150000	275520000	257280000	267690000	290270000	232610000	266300000	250160000	229050000	253570000	275230000	257960000
H3BK44	Melanoma inhibitory activity protein 2	Ctage5;Mia2	10	17312000	20224000	19523000	16116000	17903000	17041000	18526000	13737000	14392000	16584000	16759000	16677000	17160000	15418000	16477000	17562000
O08738	Caspase-6;Caspase-6 subunit p18;Caspase-6 subunit p11	Casp6	10	83053000	75043000	74084000	71197000	65986000	71011000	58699000	71995000	67995000	55346000	72829000	65527000	57032000	65711000	50980000	85112000
O08807	Peroxiredoxin-4	Prdx4	10	3568200000	2064500000	2307200000	2234400000	2432600000	2772100000	2044700000	2551700000	2081100000	1915700000	2253100000	2282100000	2061900000	2014300000	2574300000	3167500000
O35350	Calpain-1 catalytic subunit	Capn1	10	26462000	24997000	21811000	24222000	21194000	22000000	19603000	20982000	18647000	22488000	23227000	20253000	20510000	22105000	21121000	21782000
O35685	Nuclear migration protein nudC	Nudc	10	64109000	61238000	55800000	55903000	73284000	74992000	58371000	69714000	65662000	53185000	69243000	61187000	55529000	58120000	67732000	72128000
O35969	Guanidinoacetate N-methyltransferase	Gamt	10	28847000	40134000	39064000	34609000	31236000	31180000	56772000	33936000	35231000	39485000	35069000	38360000	30181000	24882000	35388000	34890000
O70570	Polymeric immunoglobulin receptor;Secretory component	Pigr	10	46011000	48560000	65780000	42260000	47651000	35484000	46515000	44391000	48448000	45885000	53859000	50801000	44099000	47196000	46680000	22461000
P04247	Myoglobin	Mb	10	893126	822315	809843	763642	348080000	94379000	865364	26755000	729584	841786	491670	766673	560620000	878568	649718	752936
P05064	Fructose-bisphosphate aldolase A;Fructose-bisphosphate aldolase	Aldoa;Aldoart1	10	61220000	39476000	39143000	31176000	40541000	37164000	35983000	32964000	27282000	35532000	30673000	31209000	57417000	36906000	33387000	28581000
P07356	Annexin A2;Annexin	Anxa2	10	40926000	46571000	40455000	41092000	46941000	57160000	33442000	58879000	42225000	37314000	42198000	37255000	40659000	41008000	41156000	44618000
P0DP28	Calmodulin-3	Calm3	10	1574100000	1453000000	1360400000	1337000000	1447300000	1864200000	1250700000	1581100000	1387900000	1273400000	1691400000	1555300000	1395600000	1504700000	1507000000	1629200000
P12787	Cytochrome c oxidase subunit 5A, mitochondrial	Cox5a	10	260660000	387540000	437830000	689870000	392380000	504640000	301650000	514820000	378810000	477090000	323830000	584780000	455840000	338990000	605590000	457250000
P17439	Glucosylceramidase	Gba	10	29886000	41463000	35933000	32856000	51870000	44099000	37852000	51455000	39277000	30746000	44824000	50300000	46496000	44229000	51292000	58264000
P19639	Glutathione S-transferase Mu 3	Gstm3	10	270510000	194950000	188360000	189510000	119470000	110530000	213160000	148260000	269550000	227080000	231810000	187910000	179510000	204260000	166520000	150740000
P19783	Cytochrome c oxidase subunit 4 isoform 1, mitochondrial	Cox4i1	10	168350000	237440000	338840000	435710000	277360000	302970000	225730000	301500000	269600000	347120000	178430000	367930000	331890000	237140000	389780000	176120000
P23589	Carbonic anhydrase 5A, mitochondrial	Ca5a	10	177510000	164240000	148760000	175960000	128210000	170630000	146060000	180000000	171900000	155670000	161480000	139840000	148610000	151790000	135090000	149650000
P24547	Inosine-5-monophosphate dehydrogenase 2	Impdh2	10	31971000	30215000	31506000	27406000	30473000	28210000	30020000	36666000	35824000	31348000	30268000	32088000	32232000	33771000	32644000	34149000
P26516	26S proteasome non-ATPase regulatory subunit 7	Psmd7	10	35265000	40646000	47954000	41204000	44853000	26883000	46982000	40544000	50120000	42446000	42134000	46684000	39979000	47443000	48646000	33056000
P28063	Proteasome subunit beta type-8;Proteasome subunit beta type	Psmb8	10	159490000	96546000	110530000	129630000	102870000	116450000	94173000	122420000	116240000	119000000	156860000	91446000	97310000	135850000	104670000	113080000
P28352	DNA-(apurinic or apyrimidinic site) lyase;DNA-(apurinic or apyrimidinic site) lyase, mitochondrial	Apex1	10	88862000	67158000	66871000	63903000	64841000	103010000	61565000	78512000	63492000	62271000	79573000	81293000	75915000	73980000	65336000	102560000
P29699	Alpha-2-HS-glycoprotein	Ahsg	10	170900000	125030000	170950000	128900000	197320000	191120000	173630000	164470000	142600000	138170000	173270000	169270000	136000000	130600000	174480000	175590000
P46664	Adenylosuccinate synthetase isozyme 2	Adss	10	13312000	11653000	34417000	28225000	2230400	5883200	15541000	32446000	33105000	28753000	31135000	28979000	25769000	24544000	21407000	25387000
P47757-2	F-actin-capping protein subunit beta	Capzb	10	56352000	57372000	64257000	59252000	60195000	54981000	58234000	53063000	64048000	65293000	55450000	59611000	55940000	59198000	57728000	46532000
P47911	60S ribosomal protein L6	Rpl6	10	127260000	136550000	125640000	96770000	159330000	112970000	140770000	114890000	107940000	115230000	98561000	138130000	130260000	100540000	158820000	155750000
P48722-2	Heat shock 70 kDa protein 4L	Hspa4l	10	36627000	32842000	37048000	35677000	39856000	33330000	33228000	35947000	36665000	33420000	37567000	32869000	33343000	34076000	41129000	35171000
P50396	Rab GDP dissociation inhibitor alpha	Gdi1	10	30172000	29434000	40537000	38735000	31227000	25984000	39013000	38711000	45976000	37587000	22271000	34262000	34751000	36922000	42913000	19094000
P58137	Acyl-coenzyme A thioesterase 8	Acot8	10	40529000	59622000	53616000	45737000	52449000	32267000	42570000	48162000	49367000	46617000	50236000	56796000	44767000	46573000	48716000	32478000
P61022	Calcineurin B homologous protein 1	Chp1	10	54927000	75590000	58168000	60927000	60367000	59100000	52711000	59724000	46977000	56018000	59303000	57365000	58340000	58441000	58025000	49418000
P62880	Guanine nucleotide-binding protein G(I)/G(S)/G(T) subunit beta-2	Gnb2	10	61669000	64948000	84727000	76666000	85603000	73281000	75995000	80297000	77929000	84664000	72794000	88796000	80654000	76440000	83290000	61183000
P70266	6-phosphofructo-2-kinase/fructose-2,6-bisphosphatase 1;6-phosphofructo-2-kinase;Fructose-2,6-bisphosphatase	Pfkfb1	10	19101000	35685000	30268000	30142000	20612000	15288000	29530000	38280000	29464000	30623000	27017000	26020000	31359000	24126000	32537000	22968000
P70404	Isocitrate dehydrogenase [NAD] subunit gamma 1, mitochondrial	Idh3g	10	42666000	41988000	44669000	41177000	56988000	53759000	48439000	53225000	45535000	38613000	49375000	48015000	54394000	51286000	56686000	49070000
P70677	Caspase-3;Caspase-3 subunit p17;Caspase-3 subunit p12	Casp3	10	44928000	36677000	39721000	37402000	34290000	47434000	35979000	44064000	40955000	38735000	41563000	39388000	40876000	39064000	40582000	53162000
P97821	Dipeptidyl peptidase 1;Dipeptidyl peptidase 1 exclusion domain chain;Dipeptidyl peptidase 1 heavy chain;Dipeptidyl peptidase 1 light chain	Ctsc	10	220770000	185070000	157150000	176600000	202510000	220790000	134800000	189970000	167660000	147410000	226720000	192780000	173920000	208890000	171020000	227640000
Q01339	Beta-2-glycoprotein 1	Apoh	10	36988000	39232000	33594000	33563000	31222000	38715000	37322000	44432000	30916000	34939000	34771000	35500000	33086000	34904000	31240000	43059000
Q05D44	Eukaryotic translation initiation factor 5B	Eif5b	10	22282000	27597000	31628000	27075000	28257000	28383000	27392000	24701000	29901000	26094000	27328000	30613000	24799000	25531000	29185000	30615000
Q3TCD4	Enoyl-CoA delta isomerase 2, mitochondrial	Eci2	10	25138000	38681000	47470000	42916000	54598000	38321000	61456000	49389000	49269000	41397000	39882000	55700000	43605000	40725000	45861000	40547000
Q3TQC7	Ectonucleoside triphosphate diphosphohydrolase 5	Entpd5	10	28228000	49813000	40628000	35078000	27635000	14628000	43351000	29177000	39980000	36752000	31275000	39252000	37700000	34208000	32193000	20543000
Q3U0V1	Far upstream element-binding protein 2	Khsrp	10	28387000	27811000	21864000	20959000	22874000	24578000	20029000	19720000	19066000	23766000	20846000	22322000	19408000	23009000	22977000	26489000
Q3UGC7	Eukaryotic translation initiation factor 3 subunit J-A;Eukaryotic translation initiation factor 3 subunit J-B	Eif3j1;Eif3j2	10	85238000	82191000	82484000	70663000	94464000	98831000	78549000	83198000	80332000	76023000	88678000	86374000	81232000	77873000	80485000	89682000
Q3UPL0-2	Protein transport protein Sec31A	Sec31a	10	53272000	59351000	60671000	48381000	57628000	50325000	108730000	48490000	49575000	51432000	52541000	55697000	53997000	54343000	55515000	50236000
Q5EBP8	Heterogeneous nuclear ribonucleoprotein A1;Heterogeneous nuclear ribonucleoprotein A1, N-terminally processed	Hnrnpa1	10	89035000	79979000	76886000	69918000	75258000	90397000	68774000	70729000	75276000	76113000	88886000	86285000	82353000	79953000	76902000	101910000
Q5RKZ7	Molybdenum cofactor biosynthesis protein 1;Cyclic pyranopterin monophosphate synthase;Cyclic pyranopterin monophosphate synthase accessory protein	Mocs1	10	75491000	73737000	64823000	74147000	84270000	84299000	71169000	84608000	72052000	63616000	81119000	80176000	80084000	80521000	83486000	111980000
Q61029-3	Lamina-associated polypeptide 2, isoforms beta/delta/epsilon/gamma;Lamina-associated polypeptide 2, isoforms alpha/zeta	Tmpo	10	30313000	30400000	34647000	32129000	33397000	34355000	29013000	34183000	24249000	31675000	33398000	35061000	31483000	29945000	30264000	36374000
Q61133	Glutathione S-transferase theta-2	Gstt2	10	49510000	51589000	48909000	57631000	46025000	36847000	70529000	39513000	55109000	54877000	44400000	38801000	48111000	57878000	44330000	43708000
Q61171	Peroxiredoxin-2	Prdx2	10	600050000	615400000	524070000	584340000	568850000	609050000	510630000	608430000	553880000	549010000	595360000	591240000	554970000	521940000	566590000	691140000
Q61335	B-cell receptor-associated protein 31	Bcap31	10	16218000	24436000	31834000	27006000	24559000	22405000	23565000	14604000	19697000	22571000	23271000	25668000	25128000	17727000	20954000	13446000
Q62446	Peptidyl-prolyl cis-trans isomerase FKBP3	Fkbp3	10	90606000	78394000	69136000	66147000	72667000	87165000	61833000	74395000	73061000	65053000	87274000	73611000	72715000	73991000	75864000	76497000
Q7TQE2	Zyxin	Zyx	10	28042000	19676000	19603000	22318000	18203000	26068000	21967000	18153000	20321000	18993000	20428000	18291000	19372000	22365000	21254000	22221000
Q80X50-2	Ubiquitin-associated protein 2-like	Ubap2l	10	19087000	21926000	19233000	17410000	19830000	20225000	20491000	19160000	18879000	19031000	23448000	20473000	18446000	19040000	16681000	18659000
Q8BFS6	Serine/threonine-protein phosphatase CPPED1	Cpped1	10	108590000	111190000	96992000	92425000	78918000	105660000	82714000	93284000	95238000	85521000	117370000	93457000	82670000	106580000	81664000	119010000
Q8BG07-2	Phospholipase D4	Pld4	10	45641000	23077000	27184000	21986000	20842000	30581000	17851000	25910000	21227000	22913000	36395000	21661000	22766000	30466000	20377000	28669000
Q8BGL3	Sulfotransferase	2810007J24Rik	10	7486800	18189000	33054000	24863000	35828000	14799000	43262000	30226000	31899000	21209000	28940000	27736000	36626000	27750000	48253000	17362000
Q8CGC7	Bifunctional glutamate/proline--tRNA ligase;Glutamate--tRNA ligase;Proline--tRNA ligase	Eprs	10	21225000	26352000	20556000	20412000	24548000	21245000	24410000	21667000	20343000	17955000	20398000	18176000	21523000	18837000	23463000	28328000
Q8CHP8	Phosphoglycolate phosphatase	Pgp	10	31843000	39558000	32477000	33756000	37491000	42888000	37818000	39079000	37419000	38370000	40005000	40548000	43121000	45613000	41607000	47697000
Q8JZR0	Long-chain-fatty-acid--CoA ligase 5	Acsl5	10	8547100	18434000	13410000	20736000	11966000	7541600	44101000	9933800	15683000	20888000	15759000	12863000	14274000	13258000	12455000	12477000
Q8K2C6	NAD-dependent protein deacylase sirtuin-5, mitochondrial	Sirt5	10	45316000	38937000	36871000	41141000	29400000	41970000	33216000	40495000	38613000	41051000	45314000	37042000	36147000	39660000	33957000	43565000
Q8R059	UDP-glucose 4-epimerase	Gale	10	18197000	30170000	22068000	28664000	26172000	29304000	20093000	31476000	33765000	33963000	28748000	28606000	32811000	34319000	31572000	34800000
Q8VBW8	Tetratricopeptide repeat protein 36	Ttc36	10	641410000	495160000	516400000	608670000	399520000	625600000	492140000	551000000	583390000	545530000	513080000	466040000	468460000	416310000	514400000	659660000
Q8VCF0	Mitochondrial antiviral-signaling protein	Mavs	10	58790000	65983000	62717000	64004000	56864000	59331000	65272000	60321000	47704000	65270000	61613000	64153000	53962000	60342000	48458000	63435000
Q8VDJ3	Vigilin	Hdlbp	10	23656000	31628000	33401000	39121000	42906000	28108000	48065000	23820000	26470000	28524000	27011000	33386000	33080000	28521000	46386000	36784000
Q8VDQ1	Prostaglandin reductase 2	Ptgr2	10	40918000	40786000	45002000	40521000	35512000	31982000	39317000	43865000	44942000	45183000	29687000	41248000	39271000	45343000	41736000	31460000
Q91VA6	Polymerase delta-interacting protein 2	Poldip2	10	35360000	50979000	40627000	41730000	45808000	45120000	43511000	49224000	41379000	46048000	48168000	47993000	49804000	38010000	52812000	52251000
Q91W50	Cold shock domain-containing protein E1	Csde1	10	9812400	14400000	16331000	13626000	15857000	13375000	13875000	14302000	16429000	14607000	15374000	15376000	13883000	14772000	15006000	13932000
Q91WK1	SPRY domain-containing protein 4	Spryd4	10	84147000	80319000	74183000	63524000	88564000	94656000	80232000	117480000	84621000	60019000	87428000	84791000	94299000	85840000	93718000	100090000
Q91X34	Bile acid-CoA:amino acid N-acyltransferase	Baat	10	26704000	27313000	37115000	30553000	28882000	17419000	46633000	18448000	33005000	44145000	26901000	29616000	27768000	36649000	29696000	20407000
Q91X91	Nicotinate-nucleotide pyrophosphorylase [carboxylating]	Qprt	10	214720000	153210000	149960000	132640000	131650000	109420000	144850000	99304000	171830000	187060000	141240000	140500000	143990000	154270000	159320000	126490000
Q91YP3	Deoxyribose-phosphate aldolase	Dera	10	21061000	33236000	36514000	30521000	35902000	27177000	33756000	33216000	31991000	38663000	27689000	35301000	30441000	27663000	32981000	26568000
Q921L6	Src substrate cortactin	Cttn	10	51580000	53899000	51120000	40691000	56720000	51456000	55013000	39693000	49721000	45119000	55084000	53828000	52124000	51403000	48686000	50002000
Q922Q8	Leucine-rich repeat-containing protein 59	Lrrc59	10	299930000	387840000	283530000	324540000	363620000	307500000	251720000	362310000	247320000	366050000	322870000	341500000	338210000	273550000	306120000	297820000
Q99JT9	1,2-dihydroxy-3-keto-5-methylthiopentene dioxygenase	Adi1	10	75719000	87465000	74408000	74473000	60591000	69617000	55407000	68429000	77759000	65972000	73660000	76499000	64236000	67871000	61950000	62039000
Q99LB6	Methionine adenosyltransferase 2 subunit beta	Mat2b	10	65138000	53096000	63809000	61069000	61183000	62006000	59328000	62349000	58140000	58585000	64393000	58866000	50919000	65428000	56933000	62520000
Q99P30-3	Peroxisomal coenzyme A diphosphatase NUDT7	Nudt7	10	110840000	172130000	153680000	161550000	159150000	115660000	160230000	162020000	175280000	154480000	115300000	136110000	176160000	144220000	194280000	131440000
Q9CQC9	GTP-binding protein SAR1b	Sar1b	10	359570000	475750000	377930000	422530000	396500000	302140000	359800000	358650000	386430000	417630000	456470000	448410000	390020000	353460000	422080000	359110000
Q9CR68	Cytochrome b-c1 complex subunit Rieske, mitochondrial;Cytochrome b-c1 complex subunit 11	Uqcrfs1	10	170310000	239850000	250720000	263670000	307080000	293720000	259700000	268290000	241530000	287420000	238530000	300920000	332180000	238310000	327220000	322930000
Q9CW42	Mitochondrial amidoxime-reducing component 1	Marc1	10	24271000	32658000	26688000	25256000	27268000	20717000	41847000	22903000	25197000	33293000	20884000	28125000	24273000	24139000	23718000	27280000
Q9CXW4	60S ribosomal protein L11	Rpl11	10	326050000	293010000	269250000	282860000	278170000	298550000	272190000	295210000	251560000	286390000	262260000	277610000	287390000	279610000	272030000	303700000
Q9CYW4	Haloacid dehalogenase-like hydrolase domain-containing protein 3	Hdhd3	10	115880000	112810000	107710000	118980000	126480000	131610000	121560000	129210000	138540000	94083000	156260000	129400000	121040000	127660000	149320000	150900000
Q9D154	Leukocyte elastase inhibitor A	Serpinb1a	10	16435000	49099000	40352000	55600000	7934100	5339500	13026000	22473000	44684000	71249000	21982000	29665000	13427000	23444000	9035000	2452800
Q9D172	ES1 protein homolog, mitochondrial	D10Jhu81e	10	818460000	745950000	623020000	736500000	671530000	979500000	607200000	790070000	734350000	629070000	788310000	701390000	766760000	747980000	751460000	1091700000
Q9D6J6	NADH dehydrogenase [ubiquinone] flavoprotein 2, mitochondrial	Ndufv2	10	52516000	85475000	94164000	115460000	82756000	99518000	63196000	109160000	75218000	100960000	64625000	122790000	99031000	64247000	106590000	101560000
Q9DCD0	6-phosphogluconate dehydrogenase, decarboxylating	Pgd	10	25324000	27581000	34582000	33733000	22160000	18840000	33752000	20290000	28034000	47094000	21647000	25912000	27624000	33625000	22730000	19577000
Q9ESB3	Histidine-rich glycoprotein	Hrg	10	46581000	54682000	53846000	71566000	53873000	53758000	50290000	49192000	49423000	47600000	54000000	68497000	60849000	46958000	55147000	51550000
Q9JHJ0	Tropomodulin-3	Tmod3	10	22917000	25422000	32681000	27988000	24495000	36738000	21097000	28713000	28365000	34504000	26439000	35913000	31005000	29999000	32412000	30396000
Q9WV68	Peroxisomal 2,4-dienoyl-CoA reductase	Decr2	10	41789000	62359000	90926000	63600000	71047000	42767000	84089000	59315000	76607000	81603000	60315000	69169000	57719000	64765000	65012000	41991000
Q9WVM8	Kynurenine/alpha-aminoadipate aminotransferase, mitochondrial	Aadat	10	205320000	182110000	115480000	169840000	167100000	161620000	161860000	175320000	154650000	151420000	125320000	140650000	148900000	162300000	167820000	199350000
Q9Z2M7	Phosphomannomutase 2	Pmm2	10	39400000	49957000	65332000	60791000	59887000	52157000	58202000	62656000	64242000	56835000	62042000	56329000	55978000	54813000	60677000	49655000
A0A0A6YX73	cAMP-dependent protein kinase type II-alpha regulatory subunit	Prkar2a	9	16739000	23524000	23589000	23245000	21168000	19339000	22123000	19853000	19857000	22139000	16565000	25406000	19245000	20063000	24739000	16857000
A0A0B4J1E2	SNW domain-containing protein 1	Snw1	9	11084000	13367000	13329000	9726300	11888000	16379000	15360000	15357000	9589400	13869000	12020000	14250000	14665000	14442000	13605000	17224000
A0A0R4J0I6	Acyl-CoA dehydrogenase family member 11	Acad11	9	18461000	13279000	8132000	17966000	11110000	12398000	86932000	8436000	10252000	6062300	8314300	12018000	13540000	8894500	7082200	7746400
A0A0R4J1H2	Glycerate kinase	Glyctk	9	51547000	62350000	67494000	63481000	60087000	49034000	70021000	58571000	70697000	65998000	55524000	62510000	66527000	59386000	73985000	59101000
A0A0R4J233	Septin-10	Septin10	9	65159000	77835000	67681000	70335000	75753000	80002000	66152000	73083000	73258000	75627000	79190000	76556000	79846000	72409000	79024000	77455000
A0A1B0GRR3	40S ribosomal protein S11	Rps11	9	99415000	56438000	68733000	61557000	81584000	78039000	86579000	79669000	75842000	58572000	69227000	61179000	74520000	73236000	83693000	83238000
A0A1Y7VJ48	Tubulin-specific chaperone A	Tbca	9	44943000	48360000	42057000	43478000	42432000	48479000	41004000	46940000	46051000	42175000	51651000	46899000	38875000	47271000	46319000	52948000
A0A494BA33	H-2 class I histocompatibility antigen, K-B alpha chain;H-2 class I histocompatibility antigen, K-K alpha chain	H2-K1	9	146310000	120720000	131760000	139980000	104980000	120020000	101000000	119800000	109140000	125660000	149690000	100760000	107410000	132770000	110020000	117060000
A0A494BBD8	Annexin A1	Anxa1	9	26583000	17592000	18861000	15938000	19244000	24142000	14605000	17457000	19051000	16673000	20043000	18916000	19616000	17589000	13844000	19075000
A2ACG7	Dolichyl-diphosphooligosaccharide--protein glycosyltransferase subunit 2	Rpn2	9	4882800	13800000	15431000	18264000	20305000	8856500	38982000	8910300	10709000	11311000	9976200	12627000	14701000	12447000	13799000	13008000
B7ZNL2	Nucleosome assembly protein 1-like 4	Nap1l4	9	51660000	52247000	52775000	51552000	49306000	53248000	43511000	53642000	51222000	48169000	54014000	46744000	47594000	50624000	50082000	54350000
D3YYE1	Acidic leucine-rich nuclear phosphoprotein 32 family member A	Anp32a	9	133490000	124760000	167140000	157500000	146010000	176030000	149870000	172660000	155120000	161720000	137350000	165590000	170670000	161630000	165910000	167580000
D3YYT0	Cadherin-2	Cdh2	9	46351000	47675000	52230000	45141000	50861000	48670000	49541000	55853000	46868000	57937000	47292000	62494000	53084000	46858000	49429000	55091000
E9PZ88	Alpha-mannosidase;Alpha-mannosidase 2C1	Man2c1	9	15899000	15144000	12457000	11635000	10764000	9907500	10625000	15069000	11454000	11330000	11223000	12695000	12402000	10133000	10832000	14825000
E9Q9P8	RDH16 family member 1	Gm28046	9	98626000	123350000	107240000	104800000	151890000	75875000	176150000	126680000	113620000	135250000	110110000	113930000	142500000	117440000	138530000	73999000
E9QN99	Abhydrolase domain containing 14b	Abhd14b	9	93561000	112810000	136480000	130410000	107850000	109730000	166250000	106650000	133030000	160580000	106130000	116330000	113220000	122530000	138150000	116370000
F7D432	Protein-L-isoaspartate O-methyltransferase;Protein-L-isoaspartate(D-aspartate) O-methyltransferase	Pcmt1	9	64631000	55937000	49000000	51652000	50933000	65751000	40372000	50271000	54140000	42932000	55779000	51981000	48875000	49288000	49494000	59325000
F8WHM5	Golgi apparatus protein 1	Glg1	9	16327000	11107000	14861000	7228100	16385000	12746000	8668000	11151000	10614000	8204700	15779000	11364000	10345000	10311000	10434000	11244000
G3UXT7	RNA-binding protein FUS	Fus	9	72898000	73425000	80383000	60372000	73860000	76253000	76039000	57009000	68916000	61168000	82314000	79082000	68950000	72676000	63803000	69465000
H7BX95	Serine/arginine-rich splicing factor 1	Srsf1	9	101280000	82448000	91250000	84150000	99554000	119530000	76877000	103920000	80094000	82334000	103950000	95072000	91469000	89693000	97622000	109400000
I7HLV2	60S ribosomal protein L10;60S ribosomal protein L10-like	Rpl10;Rpl10l	9	104930000	80150000	73994000	64450000	89150000	74351000	83802000	84478000	71181000	66686000	68968000	72956000	60310000	68952000	93564000	91932000
O35129	Prohibitin-2	Phb2	9	29382000	69017000	97453000	105310000	93795000	65069000	87813000	63090000	62086000	88958000	49878000	88406000	71431000	50137000	67221000	44130000
O54734	Dolichyl-diphosphooligosaccharide--protein glycosyltransferase 48 kDa subunit	Ddost	9	17344000	24736000	37341000	34214000	40757000	28744000	42203000	24182000	28311000	34389000	24216000	33759000	34511000	27047000	34541000	25246000
O55022	Membrane-associated progesterone receptor component 1	Pgrmc1	9	847780000	1212000000	932890000	872890000	912210000	893880000	889000000	988170000	901810000	984090000	1041600000	1019800000	960600000	877260000	884490000	705690000
O55135	Eukaryotic translation initiation factor 6	Eif6	9	53894000	53303000	56613000	57777000	46806000	59357000	51226000	53510000	56943000	46934000	65342000	57287000	48309000	59787000	48357000	60706000
O88986	2-amino-3-ketobutyrate coenzyme A ligase, mitochondrial	Gcat	9	26018000	20613000	28406000	33644000	30662000	26350000	38652000	27818000	41177000	41859000	29174000	30399000	33094000	38488000	29903000	29226000
P05977	Myosin light chain 1/3, skeletal muscle isoform	Myl1	9	1772500	822315	809843	763642	21240000	6216000	865364	2741700	729584	841786	845111	948750	278160000	1018100	525820	752936
P13634	Carbonic anhydrase 1	Ca1	9	64542000	85789000	64183000	68122000	84126000	64751000	75276000	56639000	56256000	76423000	69322000	77166000	65517000	58351000	64150000	62167000
P14131	40S ribosomal protein S16	Rps16	9	495000000	345200000	370040000	403910000	443430000	483290000	366900000	451430000	421900000	398610000	396370000	463670000	470520000	429440000	441440000	448060000
P15327	Bisphosphoglycerate mutase;Phosphoglycerate mutase	Bpgm	9	52716000	55449000	47376000	46234000	67883000	68648000	63929000	48610000	43261000	54685000	56602000	59230000	49866000	47889000	48153000	57162000
P21619	Lamin-B2	Lmnb2	9	10639000	18584000	19096000	16718000	20085000	20902000	17515000	18232000	17007000	18957000	15081000	18077000	23360000	16626000	19679000	17904000
P22437	Prostaglandin G/H synthase 1	Ptgs1	9	18916000	16224000	17662000	14233000	16625000	14364000	11798000	13144000	13149000	13298000	19621000	16430000	15828000	14212000	16529000	14974000
P23591	GDP-L-fucose synthase	Tsta3	9	16448000	17955000	34832000	41481000	41789000	37031000	36570000	40488000	42150000	38559000	34827000	32948000	39259000	45150000	37639000	37082000
P24472	Glutathione S-transferase A4	Gsta4	9	791560000	599520000	459310000	577880000	371060000	623370000	425080000	397730000	557640000	429520000	482540000	370650000	420860000	554720000	364780000	641300000
P29416	Beta-hexosaminidase subunit alpha	Hexa	9	43973000	38623000	34472000	36670000	32558000	47138000	30179000	34762000	34186000	31421000	42843000	41131000	40175000	41238000	37796000	46012000
P31786	Acyl-CoA-binding protein	Dbi	9	8380200000	7050300000	4933900000	6218300000	5567400000	6078000000	4823200000	5979400000	7135400000	5876400000	6207400000	6115000000	6251600000	6590900000	6075300000	6464200000
P32848	Parvalbumin alpha	Pvalb	9	760810	1281200	271760	223990	15662000	70898000	865364	18182000	729584	393430	1434100	1680200	797840000	878568	649718	752936
P37804	Transgelin	Tagln	9	19949000	7014100	12577000	26280000	13981000	56574000	4240300	23525000	5897000	9546300	5095600	7588600	8339800	23984000	3936800	20399000
P47754	F-actin-capping protein subunit alpha-2	Capza2	9	65310000	67464000	84484000	91698000	77233000	68887000	79830000	69652000	80157000	88719000	76144000	84463000	78259000	75164000	76024000	64561000
P48024	Eukaryotic translation initiation factor 1	Eif1	9	93000000	89546000	90346000	94164000	87566000	108270000	87729000	102920000	94315000	88490000	107260000	116730000	110010000	99635000	89610000	126630000
P52760	Ribonuclease UK114	Hrsp12	9	7478000000	6281500000	4831600000	6023300000	6035400000	6734100000	4121700000	6718300000	5964200000	6862100000	5173100000	5442400000	5564200000	5779000000	5411900000	6589300000
P57716	Nicastrin	Ncstn	9	17189000	17344000	19818000	15302000	17713000	21679000	15097000	19168000	17944000	16816000	18420000	18192000	21463000	16179000	17983000	22228000
P58044	Isopentenyl-diphosphate Delta-isomerase 1	Idi1	9	94885000	95370000	109610000	107420000	103180000	85882000	97938000	110650000	119250000	82851000	126210000	92213000	83533000	95740000	130060000	104770000
P61161	Actin-related protein 2	Actr2	9	142810000	110540000	137780000	132000000	148370000	142220000	119670000	135310000	124890000	143800000	148620000	132310000	139590000	153510000	132980000	121120000
P61982	14-3-3 protein gamma;14-3-3 protein gamma, N-terminally processed	Ywhag	9	133590000	113070000	123240000	121470000	119450000	114690000	118320000	114020000	112750000	123180000	119560000	117920000	134760000	137520000	114500000	111720000
P62082	40S ribosomal protein S7	Rps7	9	395580000	362970000	303970000	330260000	422630000	365600000	285170000	400480000	307130000	330160000	308570000	347670000	360510000	312080000	406850000	478860000
P62264	40S ribosomal protein S14	Rps14	9	137610000	94801000	104930000	116490000	118740000	120310000	101920000	126310000	116950000	106010000	115570000	109040000	99799000	111770000	125310000	120800000
P62751	60S ribosomal protein L23a	Rpl23a	9	168510000	110870000	115940000	101090000	130420000	128760000	134190000	128130000	116670000	98372000	118120000	91749000	103110000	113320000	142370000	125870000
P62835	Ras-related protein Rap-1A	Rap1a	9	294250000	281370000	255440000	256370000	269990000	278370000	237720000	279360000	253970000	234770000	308890000	274360000	246190000	267140000	249160000	268100000
P62869	Transcription elongation factor B polypeptide 2	Tceb2	9	79373000	76468000	79700000	80759000	66826000	95860000	73191000	93479000	79807000	79675000	77976000	74659000	75472000	78881000	78835000	79291000
P62960	Nuclease-sensitive element-binding protein 1	Ybx1	9	115210000	105640000	90824000	93274000	112990000	120700000	96668000	96550000	95617000	86004000	113870000	106760000	99416000	98859000	94579000	116860000
P63037	DnaJ homolog subfamily A member 1	Dnaja1	9	86405000	112840000	103400000	104890000	115570000	107770000	120350000	102420000	114720000	106080000	127130000	116510000	108750000	94629000	102720000	102600000
P97823	Acyl-protein thioesterase 1	Lypla1	9	318460000	284660000	210590000	256210000	198370000	186420000	199820000	238030000	267230000	302740000	215120000	254170000	243570000	297090000	201070000	239540000
Q00915	Retinol-binding protein 1	Rbp1	9	267750000	64511000	71880000	74806000	84138000	303680000	65993000	89799000	79141000	60215000	110390000	82484000	82285000	85878000	95309000	278280000
Q07456	Protein AMBP;Alpha-1-microglobulin;Inter-alpha-trypsin inhibitor light chain;Trypstatin	Ambp	9	48187000	40911000	50376000	44203000	40794000	50302000	38248000	43744000	51159000	32610000	56396000	50653000	42974000	36181000	53871000	59469000
Q3KQQ2	Major urinary protein 3	Mup3	9	64667000	118960000	140440000	148580000	188150000	122110000	138200000	232040000	204270000	119800000	176050000	182820000	190250000	135260000	290510000	153940000
Q3TML0	Protein disulfide-isomerase A6	Pdia6	9	86345000	70650000	91192000	83871000	99952000	91907000	97612000	96437000	74965000	85137000	69995000	90141000	82363000	71975000	110920000	97877000
Q3TNA1	Xylulose kinase	Xylb	9	30154000	44667000	46478000	44483000	26003000	18126000	41577000	45060000	48822000	45813000	29803000	33924000	30273000	36827000	38065000	26734000
Q3UE92	Xaa-Pro aminopeptidase 1	Xpnpep1	9	27434000	42357000	37145000	37005000	37102000	33108000	32813000	42087000	42178000	38903000	40459000	35869000	39322000	41065000	40104000	37231000
Q3UQ44	Ras GTPase-activating-like protein IQGAP2	Iqgap2	9	959080	3014200	2299800	4308900	759170	997042	42842000	809263	2075700	1744800	2790600	766673	2358900	2320600	1960700	2657100
Q5SUH7	Clathrin interactor 1	Clint1	9	12582000	14951000	15697000	11242000	15500000	13369000	14176000	10141000	11496000	11929000	14157000	12850000	12077000	12116000	12478000	11703000
Q60676	Serine/threonine-protein phosphatase 5;Serine/threonine-protein phosphatase	Ppp5c	9	21588000	25221000	34549000	26273000	25453000	30508000	32669000	29376000	27854000	28175000	21737000	30084000	23675000	27123000	28285000	23468000
Q60972	Histone-binding protein RBBP4	Rbbp4	9	91480000	79199000	74687000	69150000	80343000	99631000	65077000	83612000	70426000	64546000	85124000	86005000	70871000	78122000	81519000	105760000
Q61009	Scavenger receptor class B member 1	Scarb1	9	60928000	57574000	64602000	50676000	73532000	74091000	64153000	65963000	53809000	58458000	83944000	70027000	62180000	65655000	70868000	64281000
Q61702	Inter-alpha-trypsin inhibitor heavy chain H1	Itih1	9	18293000	21887000	24726000	22855000	21783000	18077000	16702000	19917000	15855000	20807000	21078000	25852000	21587000	19846000	16484000	18612000
Q62087	Serum paraoxonase/lactonase 3	Pon3	9	22822000	28091000	40639000	34358000	42831000	29369000	39239000	29798000	30872000	41212000	30017000	36567000	35154000	32672000	30861000	22160000
Q62376	U1 small nuclear ribonucleoprotein 70 kDa	Snrnp70	9	43331000	43650000	35537000	31258000	37395000	42077000	33912000	29081000	29461000	32681000	39930000	35906000	37231000	35644000	31549000	37331000
Q64471	Glutathione S-transferase theta-1	Gstt1	9	55091000	77462000	99860000	74068000	82374000	56176000	118300000	61497000	81806000	100640000	67636000	75042000	75546000	80301000	70830000	53025000
Q6P5E4	UDP-glucose:glycoprotein glucosyltransferase 1	Uggt1	9	6273200	7770100	10013000	11787000	11787000	8569600	12093000	9961100	8197500	10255000	8267200	12511000	8279600	10118000	13042000	10064000
Q6XVG2	Cytochrome P450 2C54	Cyp2c54	9	3108500	7385200	12727000	11122000	78020000	12664000	38017000	30954000	21785000	8442800	34705000	21276000	31574000	19298000	53088000	14215000
Q6ZWZ6	40S ribosomal protein S12	Rps12	9	418180000	319380000	367900000	390860000	400070000	469460000	346880000	365160000	400140000	393970000	367010000	424440000	461410000	378070000	379300000	408990000
Q80VP1	Epsin-1	Epn1	9	23583000	20480000	20867000	17978000	19417000	17353000	15107000	21914000	16335000	19360000	23222000	21123000	17408000	18231000	16287000	14066000
Q80W21	Glutathione S-transferase Mu 7	Gstm7	9	142990000	79739000	95830000	112220000	68259000	87898000	82283000	95767000	101780000	86848000	77679000	83549000	79263000	83385000	71999000	83699000
Q8BG51	Mitochondrial Rho GTPase 1	Rhot1	9	20186000	21526000	21123000	21759000	26206000	23684000	23200000	26151000	21749000	21899000	18785000	23381000	23787000	24079000	26600000	27355000
Q8BP56	Acid trehalase-like protein 1	Athl1	9	11968000	20002000	15915000	15678000	15482000	13778000	12838000	17054000	15775000	13794000	15367000	17603000	17904000	19112000	17255000	16476000
Q8C845	EF-hand domain-containing protein D2	Efhd2	9	61304000	46405000	46564000	48350000	55399000	52561000	49747000	52195000	47583000	39117000	51545000	46551000	48724000	44589000	57207000	54412000
Q8CE80	Calpastatin	Cast	9	25885000	18173000	20503000	24181000	22160000	23527000	17899000	21462000	20471000	18692000	23447000	21783000	19241000	21387000	19619000	24308000
Q8CJG0	Protein argonaute-2	Ago2	9	14220000	13659000	10776000	12538000	11033000	13189000	11414000	7880700	10168000	10932000	11411000	14773000	10172000	10325000	11445000	11875000
Q8R317	Ubiquilin-1	Ubqln1	9	48382000	59648000	51895000	47959000	59110000	44910000	48146000	54294000	47672000	47226000	51520000	49219000	47756000	50361000	51115000	44619000
Q8VCB3	Glycogen [starch] synthase, liver	Gys2	9	23182000	25656000	14464000	23924000	22857000	28554000	20954000	27196000	13023000	40806000	10517000	24749000	58467000	43451000	19330000	16224000
Q8VDG5	Phosphopantothenate--cysteine ligase	Ppcs	9	24206000	36261000	38616000	35908000	37131000	32707000	36090000	46583000	42406000	36407000	39628000	36820000	39209000	42439000	38410000	31760000
Q8VDM6	Heterogeneous nuclear ribonucleoprotein U-like protein 1	Hnrnpul1	9	197590000	205510000	170060000	136890000	185350000	185670000	161680000	158580000	145110000	157160000	170530000	177730000	150890000	161140000	183200000	187450000
Q8VEM8	Phosphate carrier protein, mitochondrial	Slc25a3	9	15400000	16136000	17930000	23997000	18363000	11726000	58389000	14174000	15281000	19886000	14384000	10633000	15835000	17196000	17937000	23123000
Q91VA7	Isocitrate dehydrogenase [NAD] subunit, mitochondrial	Idh3b	9	33033000	29384000	35989000	32570000	43918000	40213000	39977000	43281000	29748000	29830000	34998000	33309000	35574000	37812000	32217000	30526000
Q920E5	Farnesyl pyrophosphate synthase	Fdps	9	50875000	50360000	63031000	58124000	43912000	40635000	73210000	48114000	58267000	105010000	44091000	60808000	51676000	54984000	55269000	43380000
Q99J99	3-mercaptopyruvate sulfurtransferase	Mpst	9	38007000	58492000	48434000	51898000	43692000	38539000	51929000	53183000	56210000	51281000	41487000	47135000	39651000	37751000	45352000	38371000
Q9CQB4	Cytochrome b-c1 complex subunit 7	Uqcrb	9	418730000	518760000	484760000	507140000	543940000	654430000	511220000	517730000	494370000	483950000	544330000	522930000	640140000	478070000	503550000	532810000
Q9CQE1	Protein NipSnap homolog 3B	Nipsnap3b	9	126590000	139590000	122430000	124690000	148450000	157030000	121280000	158330000	146770000	129200000	165890000	152850000	127860000	141660000	137580000	169710000
Q9CR16	Peptidyl-prolyl cis-trans isomerase D	Ppid	9	85883000	87673000	85334000	91467000	83524000	85200000	70935000	90449000	80357000	86382000	83877000	87551000	85358000	75916000	87355000	101220000
Q9CZW5	Mitochondrial import receptor subunit TOM70	Tomm70a	9	11473000	14817000	16539000	15683000	20281000	12319000	20983000	17904000	14566000	21187000	13677000	19255000	17289000	17466000	17870000	16669000
Q9D0M3	Cytochrome c1, heme protein, mitochondrial	Cyc1	9	332370000	381560000	431740000	388320000	474300000	468350000	399120000	433890000	436400000	409830000	402000000	442190000	470620000	393380000	411380000	388680000
Q9D1G1	Ras-related protein Rab-1B	Rab1b	9	528560000	620040000	532130000	511870000	584660000	578850000	492840000	658490000	547780000	520830000	639310000	616480000	537370000	516200000	581990000	607630000
Q9D1P4	Cysteine and histidine-rich domain-containing protein 1	Chordc1	9	9937200	14714000	14454000	11299000	15457000	9356700	18057000	13438000	17291000	13891000	16859000	16351000	13690000	12809000	19039000	14776000
Q9D273	Cob(I)yrinic acid a,c-diamide adenosyltransferase, mitochondrial	Mmab	9	75383000	62164000	61147000	72962000	63665000	77060000	61812000	75652000	78533000	68045000	85534000	66326000	70663000	75600000	74145000	70625000
Q9D7I5	Phospholysine phosphohistidine inorganic pyrophosphate phosphatase	Lhpp	9	108520000	132550000	128260000	152950000	102110000	100190000	120400000	107440000	155600000	120400000	205510000	168370000	127600000	140280000	131480000	167150000
Q9D8C4	Interferon-induced 35 kDa protein homolog	Ifi35	9	37282000	35256000	33473000	40681000	37961000	37251000	32954000	49520000	34894000	36341000	39757000	38868000	35024000	36185000	38861000	45583000
Q9DB20	ATP synthase subunit O, mitochondrial	Atp5o	9	160940000	238840000	221280000	228670000	266850000	203270000	267190000	226620000	215780000	247820000	173290000	222650000	251980000	216100000	237770000	237600000
Q9DB26	Phytanoyl-CoA dioxygenase domain-containing protein 1	Phyhd1	9	46036000	49085000	34785000	38172000	32813000	27714000	30298000	30786000	40697000	31253000	41164000	36590000	30097000	34684000	37947000	35133000
Q9DCT2	NADH dehydrogenase [ubiquinone] iron-sulfur protein 3, mitochondrial	Ndufs3	9	61159000	96933000	130310000	135040000	116290000	118350000	96549000	135110000	107590000	146030000	85604000	163360000	144500000	93217000	138360000	119020000
Q9DCX8	Iodotyrosine dehalogenase 1	Iyd	9	144690000	160630000	156030000	178230000	132070000	155390000	107010000	144740000	118120000	172100000	151980000	166870000	123920000	112240000	136860000	112620000
Q9EP69	Phosphatidylinositide phosphatase SAC1	Sacm1l	9	28940000	26963000	29958000	26100000	32277000	24910000	29760000	21298000	25583000	33175000	26833000	32137000	29271000	29291000	27763000	18071000
Q9QXD1	Peroxisomal acyl-coenzyme A oxidase 2	Acox2	9	20990000	22486000	17466000	20371000	15269000	9554700	26941000	10397000	18205000	21388000	9915600	13138000	15663000	14656000	19994000	11387000
Q9QZ47-4	Troponin T, fast skeletal muscle	Tnnt3	9	893126	822315	809843	763642	35710000	19517000	865364	16309000	729584	841786	845111	766673	99041000	878568	649718	752936
Q9QZD9	Eukaryotic translation initiation factor 3 subunit I	Eif3i	9	19990000	23689000	22916000	21682000	26752000	25182000	26965000	25903000	21474000	21175000	27572000	26321000	24023000	22176000	24088000	30509000
Q9R099	Transducin beta-like protein 2	Tbl2	9	37673000	44910000	35997000	30754000	43599000	37442000	33992000	37177000	32579000	35781000	40135000	37430000	38253000	33979000	38572000	36377000
Q9WUM3	Coronin-1B	Coro1b	9	46502000	32961000	35043000	31462000	25673000	32645000	33668000	23271000	26969000	27491000	31497000	27143000	28014000	28767000	32301000	24966000
Q9WUU7	Cathepsin Z	Ctsz	9	83020000	73641000	72773000	70752000	104540000	99481000	75612000	69984000	75432000	56878000	101590000	92408000	84750000	86282000	96906000	114890000
Q9WVJ3	Carboxypeptidase Q	Cpq	9	110730000	122780000	96410000	112000000	132350000	113800000	102700000	130770000	122640000	100320000	149030000	124330000	170220000	146370000	153230000	142590000
Q9Z204-4	Heterogeneous nuclear ribonucleoproteins C1/C2	Hnrnpc	9	147160000	143530000	134310000	143150000	168110000	150400000	122610000	146560000	141450000	133660000	143490000	172620000	144470000	136810000	177420000	167000000
A0A0R4IZW8	Calpain small subunit 1	Capns1	8	21234000	28610000	23486000	19040000	22753000	18163000	19771000	17575000	20066000	19677000	18496000	20085000	16662000	18627000	17614000	18068000
A0A0R4J023	Methylglutaconyl-CoA hydratase, mitochondrial	Auh	8	99795000	84762000	93425000	94622000	87121000	123630000	97788000	108670000	118620000	91100000	104190000	108880000	97171000	101100000	105590000	96348000
A0A0R4J2B2	BTB/POZ domain-containing protein KCTD12	Kctd12	8	19909000	15345000	16496000	17411000	15503000	20585000	14325000	18453000	17357000	19014000	17004000	20635000	20670000	17847000	17188000	20871000
A0A140LHA2	Mitotic checkpoint protein BUB3	Bub3	8	23977000	18764000	24037000	19227000	20758000	23049000	21009000	18997000	20360000	23441000	22559000	20793000	20219000	20513000	21589000	22312000
A0A1D5RM85	60S ribosomal protein L18a	Rpl18a	8	70141000	49983000	41302000	38443000	53835000	43748000	58888000	44497000	47336000	41675000	42862000	44063000	48000000	42593000	59918000	50520000
A0A1W2P6F6	Myosin light polypeptide 6	Myl6	8	149190000	128970000	172400000	144420000	129750000	208310000	143540000	135440000	145830000	162040000	136390000	151220000	141050000	146670000	126720000	132690000
A0A2K6EDJ7	Inter alpha-trypsin inhibitor, heavy chain 4	Itih4	8	16102000	21210000	23842000	17826000	18868000	17732000	15698000	18092000	14950000	19322000	15559000	17038000	14072000	12739000	15875000	13659000
A0A3B2W812	CD2-associated protein	Cd2ap	8	11049000	12024000	14053000	11389000	13746000	13959000	12080000	11792000	10438000	10488000	12916000	12130000	11488000	10639000	13754000	11950000
A2AEX8	Four and a half LIM domains protein 1	Fhl1	8	19317000	5778800	12474000	12123000	35091000	29550000	8613300	13747000	8568600	11742000	12467000	9364000	41651000	13793000	6734200	17812000
B1AQR8	Galectin;Galectin-9	Lgals9	8	27828000	32821000	27513000	27146000	31555000	27338000	31907000	29805000	28184000	28824000	28193000	31059000	31738000	29606000	23395000	33134000
B7ZMP1	Probable Xaa-Pro aminopeptidase 3	Xpnpep3	8	33377000	37052000	34920000	31813000	32139000	47939000	33346000	36413000	36046000	32038000	38745000	39159000	35158000	36411000	39127000	58063000
D3YUT3	40S ribosomal protein S19	Rps19	8	366340000	329210000	307630000	331230000	351360000	407430000	287040000	343660000	323360000	331200000	329240000	346790000	342000000	343240000	337230000	367240000
D3YYM6	40S ribosomal protein S5;40S ribosomal protein S5, N-terminally processed	Rps5	8	446220000	424500000	388480000	405970000	445830000	479400000	354930000	424310000	422110000	403880000	440160000	469240000	479990000	428300000	485810000	526730000
E9Q4Q2	Splicing factor 1	Sf1	8	39608000	38044000	35750000	30920000	36235000	38163000	31397000	33615000	27444000	25118000	36979000	36903000	32235000	32277000	32619000	37815000
E9QNH7	Acyl-CoA-binding domain-containing protein 5	Acbd5	8	33447000	44431000	46449000	33677000	43972000	42384000	38861000	34521000	32160000	36414000	41217000	39094000	38060000	34634000	40955000	26410000
F6TQW2	Immunoglobulin gamma-2A chain C region secreted form	Ighg2c	8	279770000	89048000	92155000	160050000	94243000	318600000	94079000	34252000	45000000	128280000	122480000	194420000	20448000	87632000	123660000	62129000
F6ZV59	Heterogeneous nuclear ribonucleoprotein D0	Hnrnpd	8	98241000	115350000	122530000	119040000	123870000	115680000	107070000	119280000	112180000	116410000	102140000	140910000	115970000	111030000	119380000	130260000
G3X8T3	Carboxypeptidase;Lysosomal protective protein;Lysosomal protective protein 32 kDa chain;Lysosomal protective protein 20 kDa chain	Ctsa	8	9052700	10731000	17395000	10663000	13578000	12334000	16296000	12146000	9799200	11150000	12039000	10676000	16891000	17125000	12964000	10767000
G5E8M7	Glutathione S-transferase Mu 6	Gstm6	8	44097000	46289000	54721000	51368000	34051000	32689000	54193000	42968000	55429000	60883000	48731000	51717000	48852000	45340000	42684000	40159000
G5E8N7	Bifunctional polynucleotide phosphatase/kinase;Polynucleotide 3-phosphatase;Polynucleotide 5-hydroxyl-kinase	Pnkp	8	13727000	17061000	11873000	12448000	13953000	12126000	13500000	14941000	13784000	11936000	13220000	16482000	15059000	15970000	12374000	19084000
H7BWY4	Disks large homolog 1	Dlg1	8	15362000	17874000	16002000	13759000	17736000	16211000	16472000	17340000	15235000	17073000	16715000	14126000	15760000	12491000	12697000	20339000
O35114	Lysosome membrane protein 2	Scarb2	8	79677000	97678000	90620000	80685000	108900000	87429000	78389000	95303000	91563000	71166000	112520000	106110000	96518000	85573000	92081000	88303000
O35309	N-myc-interactor	Nmi	8	40664000	44667000	37996000	39448000	35440000	39483000	37529000	47250000	41921000	34722000	48648000	38559000	38302000	38618000	45087000	43052000
O35728	Cytochrome P450 4A14	Cyp4a14	8	893126	17784000	5193600	11698000	15027000	997042	51390000	6263000	4480800	16670000	10893000	10041000	18240000	29667000	649718	752936
O35744	Chitinase-like protein 3	Chil3	8	41389000	43912000	66472000	27264000	15655000	35614000	18803000	12581000	77155000	26733000	22824000	95812000	37483000	21696000	34608000	42420000
O35864	COP9 signalosome complex subunit 5	Cops5	8	23707000	25552000	28437000	28355000	28384000	25276000	24780000	29154000	25718000	32301000	23967000	32773000	24319000	24862000	28637000	28569000
O89020	Afamin	Afm	8	33333000	27077000	26030000	29516000	22984000	34850000	20494000	26755000	24926000	27658000	23237000	30639000	25280000	23835000	21194000	37633000
P01898	H-2 class I histocompatibility antigen, Q10 alpha chain	H2-Q10	8	40976000	57628000	58173000	43389000	51776000	37325000	45226000	43551000	58097000	46662000	54788000	51368000	45067000	43745000	48140000	32001000
P20108	Thioredoxin-dependent peroxide reductase, mitochondrial	Prdx3	8	913180000	908590000	792590000	893820000	766030000	1037700000	712020000	907010000	841380000	790670000	958020000	890480000	746850000	839950000	758120000	1136300000
P20152	Vimentin	Vim	8	14317000	10582000	13928000	15860000	15469000	25088000	18505000	16277000	9733700	10094000	13274000	14098000	15169000	13682000	13481000	13576000
P21550	Beta-enolase;Enolase	Eno3	8	1052300	822315	809843	1045500	37966000	29196000	865364	19701000	729584	841786	3126900	766673	131180000	241790	649718	1088100
P34927	Asialoglycoprotein receptor 1	Asgr1	8	279130000	316220000	291090000	300550000	325310000	324060000	295790000	332800000	316320000	324640000	340710000	301640000	287390000	293280000	308730000	276210000
P35278	Ras-related protein Rab-5C	Rab5c	8	119170000	120900000	128670000	114190000	130220000	117830000	110220000	143100000	121510000	114330000	151480000	128320000	105230000	112070000	115190000	110930000
P39447	Tight junction protein ZO-1	Tjp1	8	14633000	20098000	19586000	17466000	16548000	18098000	16432000	14166000	14482000	16726000	17086000	18984000	18121000	16985000	14278000	17854000
P45878	Peptidyl-prolyl cis-trans isomerase FKBP2	Fkbp2	8	533870000	465720000	438860000	407920000	433260000	482370000	389860000	438260000	453530000	357730000	505700000	435240000	394430000	409170000	430510000	499400000
P47963	60S ribosomal protein L13	Rpl13	8	282150000	162390000	168460000	167630000	188770000	196440000	204540000	236510000	181430000	142560000	173850000	135860000	167650000	163530000	220700000	204800000
P51410	60S ribosomal protein L9	Rpl9	8	152460000	157300000	152250000	138300000	166280000	131250000	140170000	141340000	142620000	127700000	128240000	152320000	129180000	132600000	154420000	172530000
P53395	Lipoamide acyltransferase component of branched-chain alpha-keto acid dehydrogenase complex, mitochondrial	Dbt	8	10384000	13993000	9386000	16078000	11967000	10146000	36208000	12322000	11686000	15323000	7081100	13061000	11476000	14733000	13775000	14656000
P55096	ATP-binding cassette sub-family D member 3	Abcd3	8	5991600	15957000	11707000	19211000	13320000	5284500	60351000	9421600	12158000	13462000	13610000	7075300	10960000	11621000	10910000	9801100
P57759	Endoplasmic reticulum resident protein 29	Erp29	8	110230000	106570000	96495000	102040000	115110000	124770000	90012000	102480000	97058000	103490000	98928000	106740000	92220000	89531000	123540000	127600000
P59325	Eukaryotic translation initiation factor 5	Eif5	8	34346000	38965000	46983000	47077000	45341000	46891000	41156000	42273000	41224000	48606000	35899000	53514000	47452000	44444000	46906000	48898000
P59999	Actin-related protein 2/3 complex subunit 4	Arpc4	8	138600000	103470000	116890000	143880000	150850000	151320000	126570000	134200000	125430000	137800000	129580000	109430000	153680000	150330000	138110000	127920000
P61089	Ubiquitin-conjugating enzyme E2 N	Ube2n	8	56233000	75531000	81930000	81599000	78189000	75858000	77229000	68113000	80063000	90445000	73509000	77293000	83909000	86115000	79135000	75467000
P61327	Protein mago nashi homolog;Protein mago nashi homolog 2	Magoh;Magohb	8	233680000	182650000	183080000	198380000	185770000	247430000	149700000	218950000	182280000	162790000	209600000	197950000	191940000	186810000	223510000	284560000
P62192	26S protease regulatory subunit 4	Psmc1	8	17920000	20873000	23642000	19570000	21055000	14541000	28089000	20341000	20701000	21213000	18597000	24047000	20590000	22975000	20042000	20524000
P62301	40S ribosomal protein S13	Rps13	8	454670000	372730000	365140000	404570000	463410000	459710000	342640000	471570000	418050000	383410000	399080000	365750000	425390000	412600000	439300000	468480000
P62918	60S ribosomal protein L8	Rpl8	8	117930000	80654000	71082000	71073000	94263000	82056000	99938000	99652000	80492000	64252000	76392000	82614000	69638000	72759000	106000000	113110000
P68134	Actin, alpha skeletal muscle	Acta1	8	1848700000	1660300000	1823600000	1999100000	3250100000	3293300000	2472900000	2389700000	2555000000	2185700000	2372900000	2515100000	5884500000	1841000000	1977500000	2203000000
P70349	Histidine triad nucleotide-binding protein 1	Hint1	8	851220000	643820000	673380000	720630000	822250000	899270000	685680000	870430000	821290000	650430000	937320000	761410000	721570000	785690000	842000000	953820000
P97457	Myosin regulatory light chain 2, skeletal muscle isoform	Mylpf	8	893126	822315	809843	763642	9996000	2643500	865364	2573400	729584	841786	845111	766673	75070000	878568	649718	752936
P99027	60S acidic ribosomal protein P2	Rplp2	8	1050300000	1053000000	1085800000	1024000000	1093400000	1122000000	990770000	1165900000	1054100000	981270000	1049500000	1258100000	1084200000	1040000000	1162100000	1115000000
Q07076	Annexin A7	Anxa7	8	33315000	26093000	27476000	32666000	32927000	33527000	35342000	46002000	32770000	25665000	25864000	29327000	22595000	24893000	39043000	34589000
Q283N4	2-oxo-4-hydroxy-4-carboxy-5-ureidoimidazoline decarboxylase	Urad	8	40158000	19956000	36788000	32970000	49924000	61673000	46191000	57712000	52755000	35102000	53606000	40312000	53348000	56548000	70224000	69097000
Q3TCN2	Putative phospholipase B-like 2;Putative phospholipase B-like 2 28 kDa form;Putative phospholipase B-like 2 40 kDa form;Putative phospholipase B-like 2 15 kDa form	Plbd2	8	48003000	58249000	54077000	63332000	67788000	55618000	50073000	54670000	55442000	53385000	68054000	67515000	64868000	63463000	74441000	63678000
Q3TLP5	Enoyl-CoA hydratase domain-containing protein 2, mitochondrial	Echdc2	8	170570000	181320000	209360000	204740000	203700000	214130000	181500000	208640000	228480000	200880000	225730000	226680000	181190000	207270000	278330000	182480000
Q3TLP8	Ras-related C3 botulinum toxin substrate 1;Ras-related C3 botulinum toxin substrate 2;Ras-related C3 botulinum toxin substrate 3	Rac1;Rac2;Rac3	8	168040000	135140000	150620000	132240000	157350000	173840000	123520000	148500000	144840000	136750000	171450000	143220000	150570000	145160000	145740000	154600000
Q3TMN1	Methionine aminopeptidase 2;Methionine aminopeptidase	Metap2	8	55502000	47699000	48508000	47011000	55099000	67813000	48310000	43290000	55637000	43004000	56380000	46527000	52635000	50717000	59686000	68696000
Q3U9N4	Granulins;Acrogranin;Granulin-1;Granulin-2;Granulin-3;Granulin-4;Granulin-5;Granulin-6;Granulin-7	Grn	8	19950000	7695800	7837100	8167500	13485000	17262000	10646000	9047900	9810700	9608700	11689000	14843000	12522000	5943700	8031400	27256000
Q3UZZ6	Sulfotransferase 1 family member D1	Sult1d1	8	32554000	29448000	60088000	51919000	50170000	44794000	92299000	62211000	44357000	58488000	36912000	37254000	47495000	51169000	46010000	43761000
Q5EBG8	Uncharacterized protein C1orf50 homolog		8	58110000	62031000	65160000	64638000	64732000	61180000	63239000	84308000	62109000	71638000	66260000	67759000	55016000	57464000	60759000	65724000
Q5SQB0	Nucleophosmin	Npm1	8	148160000	212260000	173150000	156120000	213380000	208620000	160320000	189810000	156210000	164870000	200810000	211180000	172750000	171480000	210880000	308160000
Q5XJY5	Coatomer subunit delta	Arcn1	8	26475000	44832000	30499000	27277000	28381000	23764000	35843000	19922000	22250000	25385000	33201000	27192000	24207000	32808000	26995000	28789000
Q60631	Growth factor receptor-bound protein 2	Grb2	8	35539000	26739000	25927000	27296000	21857000	29641000	21505000	24151000	28051000	25595000	27452000	21756000	20963000	24579000	22978000	22690000
Q60692	Proteasome subunit beta type-6	Psmb6	8	141780000	165610000	147150000	142500000	169440000	174430000	152900000	176420000	170370000	145870000	166000000	169440000	171610000	158180000	166070000	184810000
Q60936	Atypical kinase ADCK3, mitochondrial	Adck3	8	88424000	117140000	109150000	144540000	116540000	94838000	119970000	113180000	117840000	120350000	100660000	121980000	123450000	117780000	129600000	133010000
Q61503	5-nucleotidase	Nt5e	8	24351000	35030000	29496000	28860000	28233000	34396000	30230000	35144000	32183000	29992000	32292000	39393000	27602000	27379000	30328000	32345000
Q61578	NADPH:adrenodoxin oxidoreductase, mitochondrial	Fdxr	8	13917000	12331000	9563600	8555900	10780000	10704000	11783000	6451500	10349000	12630000	8079500	12241000	11733000	16611000	12285000	10378000
Q62348	Translin	Tsn	8	70060000	62071000	57506000	71658000	66367000	65357000	53783000	69903000	63058000	59516000	62040000	58868000	62904000	58770000	60338000	64980000
Q62465	Synaptic vesicle membrane protein VAT-1 homolog	Vat1	8	15152000	13980000	21114000	18125000	17162000	11539000	18212000	14083000	21137000	22839000	16090000	21528000	16337000	19784000	14557000	14203000
Q6IRU5-2	Clathrin light chain B	Cltb	8	90632000	82677000	70927000	61225000	73909000	97506000	65846000	68227000	68150000	67496000	93831000	67994000	76903000	83938000	79178000	71480000
Q6ZQI3	Malectin	Mlec	8	34339000	43877000	41455000	31048000	39288000	36990000	30299000	33032000	29912000	41489000	35688000	39385000	37839000	30034000	33837000	31623000
Q7M739	Nucleoprotein TPR	Tpr	8	23255000	28598000	27815000	21340000	26055000	26845000	25526000	24336000	22347000	26968000	22434000	32539000	23350000	23911000	21739000	24095000
Q7TPZ8	Carboxypeptidase A1	Cpa1	8	64760000	822315	809843	2290300	1366600	9276300	865364	4014000	729584	6967500	845111	766673	5053800	6691600	649718	752936
Q7TSV4	Phosphoglucomutase-2	Pgm2	8	25379000	22499000	22936000	23132000	24449000	30839000	18813000	24405000	23511000	19495000	25714000	27333000	27230000	30667000	24815000	25985000
Q8BH69	Selenide, water dikinase 1	Sephs1	8	22093000	24792000	33828000	22785000	33584000	34300000	25572000	30194000	27502000	25736000	28206000	30624000	26808000	26436000	29263000	35755000
Q8BP40	Lysophosphatidic acid phosphatase type 6	Acp6	8	47874000	45592000	39938000	39129000	35923000	39320000	42017000	32173000	41639000	34991000	36183000	38043000	41707000	43613000	35975000	29403000
Q8BTZ7	Mannose-1-phosphate guanyltransferase beta	Gmppb	8	30988000	30698000	32621000	30111000	34910000	21014000	27181000	35911000	35000000	36493000	40140000	34523000	28997000	30572000	34255000	27893000
Q8BWP5	Alpha-tocopherol transfer protein	Ttpa	8	13809000	18549000	17466000	23238000	15729000	4583000	32311000	13317000	17341000	24015000	16479000	13902000	17645000	16165000	17620000	14276000
Q8C0M9	Isoaspartyl peptidase/L-asparaginase;Isoaspartyl peptidase/L-asparaginase alpha chain;Isoaspartyl peptidase/L-asparaginase beta chain	Asrgl1	8	31652000	27312000	27387000	22579000	19525000	19423000	20818000	26783000	25436000	23245000	22657000	21801000	20314000	20928000	21184000	18912000
Q8C6B0	Methyltransferase like 7A1	Mettl7a1;mCG_20149	8	31955000	18793000	29460000	26503000	39215000	21093000	44967000	26157000	38099000	31935000	24460000	20302000	28065000	23149000	29489000	24007000
Q8K1Z0	Ubiquinone biosynthesis protein COQ9, mitochondrial	Coq9	8	106860000	128240000	94566000	99094000	109040000	85179000	102740000	93088000	103100000	107540000	77413000	113100000	115360000	94888000	114860000	106210000
Q8K2I4	Beta-mannosidase	Manba	8	13258000	14832000	14237000	17127000	20911000	16571000	15580000	15378000	16659000	12433000	19446000	16473000	25273000	20520000	26097000	17427000
Q8K4Z5	Splicing factor 3A subunit 1	Sf3a1	8	21932000	19109000	20275000	16437000	19531000	14712000	19234000	16528000	15899000	15569000	25043000	18100000	16688000	17155000	26104000	15315000
Q8R081	Heterogeneous nuclear ribonucleoprotein L	Hnrnpl	8	42786000	43855000	60721000	57362000	60631000	40441000	63109000	39036000	56736000	63307000	53117000	66957000	64862000	64711000	76558000	48921000
Q8R3Q6	Coiled-coil domain-containing protein 58	Ccdc58	8	140770000	132520000	120430000	130470000	149640000	170730000	117090000	161650000	136810000	120020000	145770000	132920000	149310000	145700000	151390000	183120000
Q8VCH0	3-ketoacyl-CoA thiolase B, peroxisomal	Acaa1b	8	459870000	1118300000	732250000	656940000	464900000	295900000	535430000	411050000	714840000	711360000	590470000	740710000	487490000	629220000	432420000	369400000
Q8VCU1	Carboxylesterase 3B	Ces3b	8	157710000	130270000	157960000	202170000	398490000	260160000	234690000	425740000	260050000	197660000	223600000	296930000	350860000	270540000	565500000	392240000
Q8VCZ9	Probable proline dehydrogenase 2	Prodh2	8	9593200	12785000	15107000	11600000	13305000	13556000	17192000	10948000	14550000	15831000	12604000	13367000	14526000	14629000	15030000	11745000
Q91WK2	Eukaryotic translation initiation factor 3 subunit H	Eif3h	8	21871000	25422000	30263000	21012000	27169000	19958000	26481000	24601000	26063000	30205000	23968000	28095000	23591000	23462000	27410000	23606000
Q91Z25	Actin-related protein 2/3 complex subunit 1B	Arpc1b	8	66065000	45282000	61359000	54974000	60730000	62716000	55170000	45911000	64847000	70170000	66033000	53963000	67479000	74404000	60482000	58805000
Q920A5	Retinoid-inducible serine carboxypeptidase	Scpep1	8	30231000	36780000	41422000	46793000	54735000	44624000	52715000	53798000	52997000	41381000	47629000	51452000	71717000	63177000	78629000	46789000
Q99K28	ADP-ribosylation factor GTPase-activating protein 2	Arfgap2	8	21642000	29654000	25352000	26306000	26856000	22782000	25800000	24115000	23194000	24527000	29513000	31037000	25811000	24175000	25099000	26190000
Q99K48	Non-POU domain-containing octamer-binding protein	Nono	8	32079000	38945000	35158000	25010000	37860000	31836000	38335000	27152000	33417000	28999000	41851000	32902000	29421000	33508000	37987000	38509000
Q99KK9	Probable histidine--tRNA ligase, mitochondrial	Hars2	8	59225000	55231000	51471000	51436000	52393000	69150000	64129000	61095000	49153000	51149000	32458000	53222000	47337000	50943000	72239000	86485000
Q99L04	Dehydrogenase/reductase SDR family member 1	Dhrs1	8	13661000	14707000	15331000	16620000	19283000	14046000	32202000	15001000	15722000	17567000	17279000	16790000	14120000	17272000	19933000	15096000
Q9CPQ1	Cytochrome c oxidase subunit 6C	Cox6c	8	84663000	104210000	111220000	130030000	111930000	121030000	85817000	101190000	97729000	121490000	79613000	121530000	112970000	86480000	123930000	79389000
Q9CQR6	Serine/threonine-protein phosphatase 6 catalytic subunit;Serine/threonine-protein phosphatase 6 catalytic subunit, N-terminally processed	Ppp6c	8	27244000	26461000	25823000	21322000	18976000	26653000	20170000	22216000	21324000	21637000	25890000	21572000	22159000	22794000	18555000	27725000
Q9CQT1	Methylthioribose-1-phosphate isomerase	Mri1	8	28618000	33022000	34870000	36279000	30929000	32902000	32198000	38724000	42419000	36014000	34349000	39268000	39348000	47779000	32361000	45846000
Q9CQV8	14-3-3 protein beta/alpha;14-3-3 protein beta/alpha, N-terminally processed	Ywhab	8	67966000	70320000	87806000	73215000	76330000	74148000	75097000	75828000	85948000	76796000	79301000	79489000	73422000	81075000	83462000	70839000
Q9CXW2	28S ribosomal protein S22, mitochondrial	Mrps22	8	20581000	21043000	18064000	13867000	15698000	16969000	16181000	13407000	16847000	16134000	18545000	16377000	16441000	16488000	16300000	19249000
Q9CZM2	60S ribosomal protein L15	Rpl15	8	136940000	105210000	110240000	88372000	133550000	111600000	134860000	99865000	112420000	97035000	117110000	108460000	102350000	105190000	130270000	142910000
Q9D024	Coiled-coil domain-containing protein 47	Ccdc47	8	8978900	8367400	13237000	7311900	12999000	12470000	12145000	9115000	9129900	10162000	9901100	11304000	11120000	10057000	10359000	8150200
Q9D1M0	Protein SEC13 homolog	Sec13	8	53339000	74679000	88085000	73562000	92745000	84661000	85944000	95054000	76122000	81403000	77270000	87849000	79163000	70806000	88631000	90038000
Q9DB05	Alpha-soluble NSF attachment protein	Napa	8	19349000	14141000	24595000	16792000	20625000	21040000	16975000	21444000	19867000	19575000	19953000	20417000	17199000	16179000	17785000	17466000
Q9DBG5	Perilipin-3	Plin3	8	13533000	17193000	17880000	16087000	12142000	13283000	13138000	12970000	12174000	17309000	13212000	13024000	14751000	12639000	13316000	14065000
Q9DBL7	Bifunctional coenzyme A synthase;Phosphopantetheine adenylyltransferase;Dephospho-CoA kinase	Coasy	8	10066000	15936000	15982000	15838000	15228000	9262000	25598000	12380000	16419000	18107000	10070000	15224000	15675000	12320000	17345000	12042000
Q9DBP5	UMP-CMP kinase	Cmpk1	8	67485000	90280000	108330000	95440000	99225000	82274000	92106000	95954000	104290000	112870000	85779000	106710000	98502000	97999000	102460000	89191000
Q9DCL9	Multifunctional protein ADE2;Phosphoribosylaminoimidazole-succinocarboxamide synthase;Phosphoribosylaminoimidazole carboxylase	Paics	8	12234000	14442000	15408000	13966000	17180000	11526000	17578000	15324000	15014000	15009000	11340000	12712000	13176000	10299000	15676000	13975000
Q9DCS2	UPF0585 protein C16orf13 homolog	0610011F06Rik	8	287120000	473790000	330550000	335160000	325260000	329580000	284130000	390880000	375430000	306620000	373800000	364410000	413410000	377260000	367960000	362450000
Q9DCT8	Cysteine-rich protein 2	Crip2	8	246890000	217530000	204860000	199450000	236710000	249430000	220860000	197750000	223570000	182150000	282170000	222360000	195060000	208600000	216150000	285350000
Q9EQI8	39S ribosomal protein L46, mitochondrial	Mrpl46	8	23899000	25811000	25303000	23559000	25640000	26319000	24166000	21970000	25654000	21107000	28929000	25658000	25807000	26497000	27272000	29392000
Q9QXC1	Fetuin-B	Fetub	8	42304000	38232000	45353000	45304000	47155000	53252000	41418000	47190000	42980000	32654000	53853000	49715000	42650000	49436000	53373000	49384000
Q9QXY6	EH domain-containing protein 3	Ehd3	8	15796000	20475000	19793000	21807000	20299000	21165000	26957000	15865000	16630000	14392000	19103000	24381000	18510000	21615000	17775000	27521000
Q9QZ08	N-acetyl-D-glucosamine kinase	Nagk	8	24920000	20311000	24179000	32515000	8199300	12080000	16313000	17577000	34397000	13923000	9508800	10178000	9960500	9833500	13866000	39696000
Q9R0M5	Thiamin pyrophosphokinase 1	Tpk1	8	56730000	50365000	45173000	51190000	53133000	53036000	46080000	56164000	53572000	39644000	61289000	52354000	55648000	53634000	49721000	60619000
Q9WTX5	S-phase kinase-associated protein 1	Skp1	8	118110000	130220000	98098000	117260000	113320000	101050000	93892000	111870000	89560000	97608000	116670000	98146000	102980000	105280000	103230000	124280000
Q9WUM5	Succinyl-CoA ligase [ADP/GDP-forming] subunit alpha, mitochondrial	Suclg1	8	96929000	124720000	152860000	146420000	133240000	121680000	188180000	147370000	196190000	144640000	155610000	128480000	158140000	161850000	149070000	160960000
Q9WV55	Vesicle-associated membrane protein-associated protein A	Vapa	8	83127000	114730000	132320000	94038000	114160000	83506000	127100000	96228000	114250000	135220000	105410000	116610000	94384000	113490000	110740000	65802000
Q9WVA4	Transgelin-2	Tagln2	8	52134000	46832000	53858000	40508000	50018000	70163000	46809000	44257000	40769000	53416000	40324000	44162000	44393000	50933000	48495000	57555000
Q9WVD5	Mitochondrial ornithine transporter 1	Slc25a15	8	12596000	14772000	13010000	16395000	15075000	13205000	55379000	11187000	16189000	18260000	16227000	13593000	12689000	13654000	10626000	20448000
V9GXP8	ELKS/Rab6-interacting/CAST family member 1	Erc1	8	35765000	34292000	27466000	30337000	38173000	43597000	30200000	32556000	25844000	37731000	34825000	46601000	45473000	23214000	38746000	30480000
A0A087WNP6	Protein CDV3	Cdv3	7	53833000	56988000	53520000	51648000	53474000	57792000	52174000	59362000	54889000	52320000	64836000	63659000	50136000	48203000	55076000	73252000
A0A087WPL5	ATP-dependent RNA helicase A	Dhx9	7	4622500	5867600	7138800	7594200	7220300	4938500	9284200	5438800	6426500	5909200	6731000	8551700	6386400	6707000	6618400	10764000
A0A0G2JDV8	Calponin-3	Cnn3	7	23471000	21518000	23530000	22100000	18739000	21124000	20308000	19969000	21314000	19990000	25111000	20436000	19654000	17428000	20468000	23690000
A0A0G2JG00	Far upstream element-binding protein 1	Fubp1	7	34150000	25688000	23873000	22126000	24728000	29209000	19612000	27586000	25574000	19986000	25336000	26293000	21005000	25504000	22430000	29728000
A0A0R3P9C8	NADH dehydrogenase [ubiquinone] 1 alpha subcomplex subunit 9, mitochondrial	Ndufa9	7	10861000	27038000	26308000	34654000	25656000	16615000	21226000	18843000	23895000	28288000	15149000	32959000	27548000	20287000	24346000	22525000
A0A0R4J090	Antigen-presenting glycoprotein CD1d1	Cd1d1	7	93165000	69030000	77732000	101370000	122350000	75418000	96735000	119650000	98635000	74293000	105350000	101570000	91024000	87552000	93321000	69505000
A0A0R4J0B4	N-acylneuraminate cytidylyltransferase	Cmas	7	28890000	26926000	22826000	23277000	25603000	27062000	19451000	22581000	21794000	27850000	22116000	24496000	29859000	22874000	26851000	27409000
A0A0R4J138	Arylsulfatase B	Arsb	7	37115000	40748000	39134000	34749000	64984000	57268000	47299000	45655000	46126000	34872000	57371000	47210000	62792000	63048000	74449000	56085000
A0A0R4J1R7	Pterin-4-alpha-carbinolamine dehydratase 2	Pcbd2	7	140420000	115920000	108300000	119280000	99835000	173770000	99820000	122540000	133510000	109810000	126620000	108070000	115750000	130810000	111250000	152040000
A0A140LIZ5	26S protease regulatory subunit 6B	Psmc4	7	13521000	16018000	14083000	13750000	14631000	12175000	19722000	12072000	13496000	14541000	12766000	12340000	14429000	14466000	13372000	14012000
A0A1D5RM23	Cleavage and polyadenylation specificity factor subunit 5	Nudt21	7	46118000	41584000	46185000	32915000	44635000	43998000	39174000	46573000	39455000	35294000	42134000	43272000	42487000	40945000	40516000	48103000
A0A1W2P7G2	SAP domain-containing ribonucleoprotein	Sarnp	7	27815000	19586000	27604000	21631000	29745000	31911000	23450000	24847000	25814000	26995000	27329000	27802000	27491000	24734000	28706000	29512000
A0A494BBP6	Cytosolic purine 5-nucleotidase	Nt5c2	7	14398000	17374000	11395000	10640000	9438000	10429000	9349100	10308000	9689200	10837000	9375600	13088000	10815000	11826000	9102500	12461000
A2AIH8	Pirin	Pir	7	63183000	53655000	45238000	47307000	41409000	59719000	41324000	46947000	49424000	38854000	55824000	50960000	48069000	47170000	50393000	72868000
A2AJL3	FGGY carbohydrate kinase domain-containing protein	Fggy	7	6559600	6550700	11821000	11068000	8067900	5125100	17381000	7447800	8756100	15424000	5910000	8554000	8324700	8082600	7473600	6369900
B1ATP7	Zinc phosphodiesterase ELAC protein 2	Elac2	7	19776000	19300000	18844000	18113000	20272000	18812000	16241000	20506000	18827000	18039000	23005000	22802000	22765000	16494000	21229000	24606000
B7ZNH7	Collagen alpha-1(XIV) chain	Col14a1	7	9566200	9227700	9800200	6392400	10443000	10783000	8642100	8473900	6103000	8032800	3865500	7887600	7858100	6855100	5704000	8644000
D3YY50	Copper homeostasis protein cutC homolog	Cutc	7	59516000	46039000	51204000	47798000	46036000	50257000	38528000	43458000	44305000	43657000	42127000	44465000	43978000	46760000	49848000	61843000
E9PUD2	Dynamin-1-like protein	Dnm1l	7	4088900	6140800	3786000	4479900	4985000	3164200	6721200	3182800	3343000	3476500	3398400	3952500	3972400	3995500	3858600	4279800
E9PZ00	Prosaposin	Psap	7	170260000	106280000	103580000	78684000	104390000	152930000	83305000	94326000	97972000	100340000	144120000	138400000	121360000	117250000	96352000	182290000
E9Q0W2	Solute carrier organic anion transporter family member 1A1	Slco1a1	7	8411900	822315	8799400	763642	4357000	14183000	7223600	8026100	8495500	841786	8103700	7646000	12550000	9245200	15957000	31957000
E9Q8N1	Titin	Ttn	7	47465000	31105000	33352000	42135000	36530000	44020000	53329000	43131000	42533000	50156000	41141000	34237000	30639000	39673000	36885000	41906000
E9Q9F5	Septin-7	Septin7	7	61136000	46262000	50762000	38059000	48485000	65411000	43234000	47578000	41408000	45019000	59381000	46334000	47007000	48780000	42944000	55968000
F8VQC1	Signal recognition particle subunit SRP72	Srp72	7	6996800	7368200	9970100	8744900	9528700	6887100	10919000	6019200	8652400	11618000	6435400	10761000	9834900	7059200	11354000	6895600
G3UY93	Valine--tRNA ligase	Vars	7	9937600	12082000	14598000	13123000	18301000	8231300	22302000	10512000	13502000	14231000	11630000	16545000	14380000	15296000	18426000	15926000
G3X9M0	28S ribosomal protein S29, mitochondrial	Dap3	7	15800000	21080000	18798000	20740000	18192000	22622000	16077000	19925000	20386000	18569000	17830000	19911000	18369000	19078000	17833000	26871000
K3W4Q8	Basigin	Bsg	7	210350000	247180000	208860000	190790000	250570000	228810000	207130000	216320000	205860000	202880000	268590000	249290000	222220000	226810000	218890000	218420000
O09164	Extracellular superoxide dismutase [Cu-Zn]	Sod3	7	75736000	35885000	34949000	39121000	37599000	55354000	31642000	36555000	39311000	31500000	42375000	38277000	31691000	36892000	36007000	62493000
O70250	Phosphoglycerate mutase 2	Pgam2	7	1855000	1297200	3040500	763642	24435000	18259000	2699700	6159100	729584	2801500	845111	766673	145790000	878568	4327800	15064000
O88531	Palmitoyl-protein thioesterase 1	Ppt1	7	105570000	85791000	73702000	73591000	94514000	99803000	70718000	95254000	78108000	75919000	102490000	83446000	107200000	97250000	103230000	128300000
P00186	Cytochrome P450 1A2	Cyp1a2	7	6687500	10244000	15959000	19127000	16769000	6477700	53918000	12862000	19158000	12052000	13853000	12060000	19004000	16614000	16892000	7540800
P04117	Fatty acid-binding protein, adipocyte	Fabp4	7	143330000	88425000	73622000	74177000	126670000	236610000	80613000	124050000	69669000	67577000	78489000	133680000	149590000	238770000	89636000	204580000
P07309	Transthyretin	Ttr	7	379570000	559040000	479730000	457030000	494010000	406420000	484930000	493520000	474820000	386720000	549330000	501130000	383270000	506610000	511180000	399860000
P10639	Thioredoxin	Txn	7	3844000000	3709000000	3684200000	3697100000	3395300000	3615800000	3392000000	3936800000	3915300000	3415700000	4166200000	3490600000	3447800000	3681900000	3255700000	3331500000
P13020-2	Gelsolin	Gsn	7	17267000	13781000	16797000	13745000	15293000	18953000	14203000	11384000	15058000	17585000	13548000	17570000	14833000	18957000	13857000	11347000
P13745	Glutathione S-transferase A1;Glutathione S-transferase A1, N-terminally processed;Glutathione S-transferase	Gsta1;Gsta2	7	1376300000	668740000	452470000	610390000	254910000	563270000	376480000	261750000	634600000	421090000	420890000	287530000	326690000	482560000	194600000	483960000
P16045	Galectin-1	Lgals1	7	244130000	622630000	300780000	322000000	179110000	198930000	140940000	221110000	268610000	369330000	232110000	254410000	212320000	224570000	134260000	174510000
P17047	Lysosome-associated membrane glycoprotein 2	Lamp2	7	424160000	398430000	363460000	361790000	439850000	437420000	370220000	441110000	366250000	391070000	439260000	469430000	478960000	409730000	479330000	524290000
P17427	AP-2 complex subunit alpha-2	Ap2a2	7	18426000	21301000	13155000	12852000	6938600	6755800	18495000	7153100	9075600	8007200	12468000	9213800	8545800	10477000	7642300	7646300
P24638	Lysosomal acid phosphatase	Acp2	7	17678000	14306000	13716000	14384000	15259000	17108000	12037000	17422000	14364000	15762000	13740000	15432000	15660000	15220000	13234000	15670000
P30681	High mobility group protein B2	Hmgb2	7	66474000	30745000	36817000	30249000	43074000	54809000	29380000	34606000	27776000	35604000	45339000	31386000	37740000	44311000	34750000	44302000
P47941	Crk-like protein	Crkl	7	42468000	36219000	29470000	37453000	30464000	36433000	26822000	35329000	28784000	30294000	29982000	33143000	28202000	29479000	37490000	36835000
P48774	Glutathione S-transferase Mu 5	Gstm5	7	24137000	22801000	20953000	18714000	18455000	10169000	17517000	15937000	18806000	16754000	16830000	17591000	15958000	14832000	19085000	19325000
P50462	Cysteine and glycine-rich protein 3	Csrp3	7	15877000	41188000	41701000	34237000	47585000	22143000	44000000	48851000	42498000	41700000	62868000	44315000	52682000	39714000	52121000	31509000
P52792-2	Glucokinase	Gck	7	7052200	10712000	16832000	14322000	11033000	3845500	18647000	14836000	11916000	14083000	8160800	15074000	12716000	12175000	9732300	6024400
P56213	FAD-linked sulfhydryl oxidase ALR	Gfer	7	43848000	42767000	38370000	35050000	39289000	44837000	44952000	41618000	44663000	38354000	44467000	41968000	41970000	41920000	40399000	49407000
P57784	U2 small nuclear ribonucleoprotein A	Snrpa1	7	23313000	22831000	22144000	22980000	24717000	26680000	21630000	26921000	20719000	22298000	23986000	24232000	22289000	21351000	24740000	27671000
P60335	Poly(rC)-binding protein 1	Pcbp1	7	20872000	37880000	41604000	39361000	38513000	30767000	55018000	30915000	37580000	39061000	35569000	45717000	35053000	31157000	41700000	34692000
P61458	Pterin-4-alpha-carbinolamine dehydratase	Pcbd1	7	1344100000	1159300000	1031000000	1125900000	925790000	1187600000	931180000	1067800000	1276800000	1110700000	1235300000	972240000	943820000	1134700000	975160000	1026200000
P62245	40S ribosomal protein S15a	Rps15a	7	236320000	174680000	196930000	203180000	222200000	238940000	185580000	231710000	212150000	186180000	187380000	183950000	225610000	207640000	243460000	223330000
P62806	Histone H4	Hist1h4a	7	507450000	522540000	290360000	697690000	288420000	394860000	378780000	383980000	382710000	746670000	284050000	663030000	966460000	532010000	396760000	289460000
P63163	Small nuclear ribonucleoprotein-associated protein N;Small nuclear ribonucleoprotein-associated protein B	Snrpn;Snrpb	7	91795000	73363000	64349000	65148000	82137000	93019000	61942000	66600000	71003000	67133000	79781000	66915000	79978000	67621000	70171000	78784000
P70168	Importin subunit beta-1	Kpnb1	7	8071200	11726000	16128000	14747000	12416000	10311000	17230000	11314000	13577000	17971000	7633600	16134000	15354000	13689000	14444000	10991000
P70665	Sialate O-acetylesterase;Sialate O-acetylesterase small subunit;Sialate O-acetylesterase large subunit	Siae	7	18349000	24957000	23285000	22402000	35251000	24161000	24414000	30816000	27380000	22310000	36273000	29554000	33765000	35826000	35058000	32165000
P70670	Nascent polypeptide-associated complex subunit alpha, muscle-specific form;Nascent polypeptide-associated complex subunit alpha	Naca	7	324040000	332390000	300670000	335090000	283020000	350610000	293540000	378770000	315920000	305170000	344900000	360860000	325140000	305910000	326880000	370470000
P97384	Annexin A11;Annexin	Anxa11	7	15953000	19734000	19256000	20536000	19642000	15817000	15216000	17839000	19976000	23095000	16766000	25351000	14964000	14433000	21923000	16981000
P99026	Proteasome subunit beta type-4	Psmb4	7	241120000	257320000	242780000	265110000	271170000	262070000	220630000	289940000	261290000	233950000	300120000	259130000	265330000	256880000	273330000	281560000
Q05117	Tartrate-resistant acid phosphatase type 5	Acp5	7	46091000	48694000	57667000	59975000	76093000	61657000	53836000	71348000	60406000	50722000	68240000	71617000	67735000	53006000	82719000	91386000
Q05816	Fatty acid-binding protein, epidermal	Fabp5	7	169070000	98811000	59774000	104820000	106960000	193140000	68325000	131710000	122420000	192420000	124080000	87755000	164970000	167840000	201490000	349620000
Q05915	GTP cyclohydrolase 1	Gch1	7	26028000	27171000	22561000	19362000	24828000	20845000	23325000	22930000	20249000	23774000	25308000	26321000	24483000	24125000	26495000	20262000
Q14CH1	Molybdenum cofactor sulfurase	Mocos	7	18784000	23943000	17713000	20228000	12488000	12052000	14464000	18697000	19864000	15783000	15749000	14470000	13402000	15865000	19077000	18836000
Q3TCU5	Tapasin	Tapbp	7	20959000	20523000	28156000	26342000	22155000	23224000	20179000	18598000	18720000	25397000	29811000	18847000	19701000	24276000	27240000	22275000
Q3U0B3	Dehydrogenase/reductase SDR family member 11	Dhrs11	7	48418000	40559000	41745000	44581000	41585000	40557000	34678000	42393000	48848000	38383000	45474000	44693000	40867000	46927000	47737000	46444000
Q3U422	NADH dehydrogenase [ubiquinone] flavoprotein 3, mitochondrial	Ndufv3	7	18073000	21875000	19960000	20211000	20385000	17499000	16939000	17347000	19770000	19675000	22159000	21871000	20629000	18580000	21194000	21346000
Q3UGR5	Haloacid dehalogenase-like hydrolase domain-containing protein 2	Hdhd2	7	95969000	84615000	82862000	100760000	104730000	123810000	91333000	118630000	99332000	86842000	92020000	102670000	99397000	87897000	99936000	128070000
Q3UJB0	Splicing factor 3b, subunit 2	Sf3b2	7	13157000	11968000	15144000	16340000	18349000	14866000	12559000	8868100	11358000	12957000	11663000	10851000	13113000	10388000	10947000	11417000
Q3UZ39	Leucine-rich repeat flightless-interacting protein 1	Lrrfip1	7	10572000	10566000	9678100	8745800	9569300	12485000	9165500	9011200	7960500	8984700	9812000	9451700	8772000	10273000	9774400	11649000
Q569Z6	Thyroid hormone receptor-associated protein 3	Thrap3	7	17585000	14475000	15532000	14028000	20443000	17481000	16387000	13569000	12800000	14328000	17397000	17478000	17132000	15281000	17904000	17565000
Q58A65	C-Jun-amino-terminal kinase-interacting protein 4	Spag9	7	7688400	6955700	8505900	7607600	8232300	8427000	7924400	6238000	8160700	8735300	6183800	8278200	8547900	6609000	8322500	7026100
Q5SV41	Phosphatidylcholine transfer protein	Pctp	7	53204000	64000000	44094000	58305000	54132000	25397000	47273000	52981000	44877000	56732000	44653000	48064000	38256000	47303000	39473000	29873000
Q61081	Hsp90 co-chaperone Cdc37;Hsp90 co-chaperone Cdc37, N-terminally processed	Cdc37	7	19532000	20746000	25595000	22142000	24895000	23656000	24258000	24044000	22593000	22577000	21030000	19871000	19006000	18234000	23425000	23560000
Q61599	Rho GDP-dissociation inhibitor 2	Arhgdib	7	143970000	103220000	104540000	89611000	94376000	109350000	75027000	104580000	83361000	85508000	126850000	101910000	94086000	100290000	96701000	126350000
Q61792	LIM and SH3 domain protein 1	Lasp1	7	183490000	164800000	157210000	139540000	135210000	198380000	131230000	145650000	158860000	151080000	197140000	148490000	134540000	153530000	167290000	191140000
Q62189	U1 small nuclear ribonucleoprotein A	Snrpa	7	40789000	40892000	41138000	39879000	39526000	50685000	34497000	41319000	37631000	40026000	42924000	41478000	37820000	46072000	38792000	40947000
Q62452	UDP-glucuronosyltransferase 1-9	Ugt1a9	7	39378000	36450000	45932000	33030000	48288000	40974000	49951000	29597000	33954000	35366000	29257000	36902000	34309000	36470000	27595000	27745000
Q64010	Adapter molecule crk	Crk	7	30879000	32656000	25916000	28206000	25459000	27281000	23759000	23876000	26642000	24542000	24782000	29895000	27631000	30459000	29880000	26433000
Q6IRU2	Tropomyosin alpha-4 chain	Tpm4	7	51643000	44527000	38731000	43107000	45186000	58580000	36880000	39413000	39454000	33746000	56033000	45741000	40970000	46544000	44271000	62219000
Q6PB66	Leucine-rich PPR motif-containing protein, mitochondrial	Lrpprc	7	3490300	3249500	3357300	3950800	3716400	3791000	28895000	3734300	2713000	3789200	2812900	766673	1685400	3600200	3330000	2043900
Q6ZWZ7	60S ribosomal protein L17	Rpl17	7	140000000	114540000	101940000	105250000	123380000	114050000	109610000	123320000	98851000	97733000	98958000	103000000	101160000	94805000	119620000	128740000
Q7M6Y3-2	Phosphatidylinositol-binding clathrin assembly protein	Picalm	7	10873000	10880000	12373000	11792000	13459000	11264000	42475000	8946500	13017000	8072000	17406000	7344100	8866900	13782000	11690000	12285000
Q7TNV0	Protein DEK	Dek	7	18053000	20036000	20832000	18064000	16181000	23819000	18135000	18556000	16146000	16750000	17674000	19543000	18836000	18270000	20270000	21236000
Q80SW1	Putative adenosylhomocysteinase 2	Ahcyl1	7	22607000	20915000	21274000	18488000	19933000	18806000	19935000	20959000	23180000	19876000	18925000	18992000	23317000	22983000	20685000	17373000
Q80UG5	Septin-9	Septin9	7	18358000	17383000	19311000	17043000	17576000	21409000	17846000	14871000	19381000	20416000	19150000	19885000	17670000	22236000	15455000	17286000
Q8BWG8-2	Beta-arrestin-1	Arrb1	7	10625000	13549000	12321000	11638000	12608000	11392000	11763000	12923000	9748800	9744200	11277000	11842000	12715000	13363000	15616000	13766000
Q8C2Q8	ATP synthase subunit gamma;ATP synthase subunit gamma, mitochondrial	Atp5c1	7	26965000	47164000	46455000	46443000	55215000	36171000	104950000	34892000	47643000	47816000	37723000	35836000	45702000	44610000	41370000	39631000
Q8C7E7	Starch-binding domain-containing protein 1	Stbd1	7	34909000	20753000	18809000	18870000	18848000	41234000	14704000	26336000	12384000	18095000	14169000	13877000	21901000	27025000	15397000	20347000
Q8CGK3	Lon protease homolog, mitochondrial	Lonp1	7	13557000	12759000	14608000	19024000	13764000	16897000	31302000	15076000	14248000	15819000	10986000	17090000	15816000	15627000	16509000	22502000
Q8K1J6	CCA tRNA nucleotidyltransferase 1, mitochondrial	Trnt1	7	19219000	13390000	15961000	10802000	13863000	18816000	11597000	17111000	22945000	14784000	13161000	21361000	14286000	15601000	19117000	34744000
Q8K4Z3	NAD(P)H-hydrate epimerase	Apoa1bp	7	187820000	163060000	202180000	192510000	174230000	144010000	165910000	184030000	226420000	214490000	170400000	184120000	170140000	195630000	162310000	128320000
Q8R180	ERO1-like protein alpha	Ero1l	7	34165000	30955000	24370000	26750000	27976000	28648000	23966000	24918000	21615000	27524000	24717000	27077000	24632000	25428000	28099000	39241000
Q8R574	Phosphoribosyl pyrophosphate synthase-associated protein 2	Prpsap2	7	23389000	24396000	20948000	20294000	20032000	19374000	16743000	24883000	21599000	23248000	20949000	20842000	16801000	18904000	18890000	26116000
Q8VDM4	26S proteasome non-ATPase regulatory subunit 2	Psmd2	7	954370	3694800	5697700	7863100	6507300	4474500	25890000	4644100	4458200	7356800	845111	2987500	780402	5247700	6248700	752936
Q8VEK0	Cell cycle control protein 50A	Tmem30a	7	29168000	40544000	37405000	32885000	44019000	38142000	34815000	34847000	32021000	30897000	41300000	34746000	43303000	30262000	39998000	24828000
Q91V12-2	Cytosolic acyl coenzyme A thioester hydrolase	Acot7	7	61906000	45766000	44814000	48472000	40646000	52446000	35512000	49159000	41456000	46091000	37048000	47121000	47321000	43776000	38459000	49676000
Q91WN4	Kynurenine 3-monooxygenase	Kmo	7	19739000	20788000	16859000	16002000	16680000	13146000	35537000	13719000	16395000	20347000	13837000	13926000	13573000	15149000	16348000	11570000
Q91WQ3	Tyrosine--tRNA ligase, cytoplasmic;Tyrosine--tRNA ligase, cytoplasmic, N-terminally processed;Tyrosine--tRNA ligase	Yars	7	19680000	15577000	21934000	27220000	23935000	23833000	19401000	18239000	22323000	18684000	19039000	23202000	23831000	17504000	28601000	21144000
Q91WS0	CDGSH iron-sulfur domain-containing protein 1	Cisd1	7	461490000	440710000	386950000	348740000	388760000	411190000	397800000	376690000	391040000	366120000	402310000	363210000	418050000	382620000	357310000	323810000
Q91X75	Cytochrome P450 2A5	Cyp2a5	7	5483700	9785000	11528000	20268000	7391100	8471500	61824000	8251900	15885000	13220000	9861200	6378000	14817000	12653000	11653000	12912000
Q91YW3	DnaJ homolog subfamily C member 3	Dnajc3	7	20498000	29241000	42907000	29453000	48972000	41757000	44587000	39210000	36153000	30150000	36909000	51290000	33040000	29231000	40929000	34774000
Q922B1	O-acetyl-ADP-ribose deacetylase MACROD1	Macrod1	7	58215000	58204000	60876000	62443000	45216000	31657000	52605000	56543000	60514000	59497000	44639000	52396000	47736000	51764000	41977000	36233000
Q99KP3	Lambda-crystallin homolog	Cryl1	7	15153000	22729000	24735000	20136000	15726000	10712000	15311000	17192000	24648000	33287000	6978400	20290000	17117000	19810000	8121700	10300000
Q99LP6	GrpE protein homolog 1, mitochondrial	Grpel1	7	151460000	126610000	108770000	127660000	112890000	146370000	114960000	143090000	134760000	119110000	119130000	111480000	143330000	130510000	133480000	133410000
Q99M87-3	DnaJ homolog subfamily A member 3, mitochondrial	Dnaja3	7	10437000	15993000	18335000	18629000	21162000	16906000	20555000	17754000	16266000	18192000	20368000	20936000	20030000	19422000	20826000	23930000
Q9CQE8	UPF0568 protein C14orf166 homolog		7	27686000	34793000	28437000	23821000	31004000	31667000	29465000	32192000	26717000	27883000	32436000	30620000	29345000	28479000	30368000	34832000
Q9CQN1	Heat shock protein 75 kDa, mitochondrial	Trap1	7	893126	1602600	809843	763642	4097100	997042	53319000	809263	729584	1550500	1321300	766673	1568700	1536300	649718	752936
Q9CQW2	ADP-ribosylation factor-like protein 8B	Arl8b	7	40557000	43803000	37707000	37519000	45684000	40617000	40197000	45453000	32588000	32321000	47837000	45214000	42081000	38394000	41108000	45012000
Q9CQX2	Cytochrome b5 type B	Cyb5b	7	393690000	478500000	467650000	412300000	381530000	382680000	452310000	369960000	446260000	420590000	529090000	368750000	397870000	405780000	367130000	306430000
Q9CR98	Protein FAM136A	Fam136a	7	154740000	132470000	110090000	120090000	127380000	156390000	117100000	129840000	134650000	124150000	137610000	124810000	137990000	140440000	132260000	162620000
Q9CRB3	5-hydroxyisourate hydrolase	Urah	7	106320000	137220000	176530000	143100000	144650000	113210000	172030000	130650000	145800000	162310000	123760000	150140000	131590000	134790000	145390000	157660000
Q9CZD3	Glycine--tRNA ligase	Gars	7	27523000	27672000	32153000	29139000	32426000	28809000	29287000	28986000	34703000	28620000	32055000	28540000	30188000	29116000	28682000	35353000
Q9D031	Ras suppressor protein 1	Rsu1	7	14842000	21379000	23854000	22725000	20759000	23860000	18719000	21360000	18207000	18950000	23062000	27642000	22454000	19659000	19520000	22862000
Q9D125	28S ribosomal protein S25, mitochondrial	Mrps25	7	16287000	10392000	13621000	13473000	10718000	16904000	16565000	14795000	17518000	12087000	18105000	17500000	13184000	12024000	14792000	13925000
Q9D1I5	Methylmalonyl-CoA epimerase, mitochondrial	Mcee	7	153790000	149580000	133610000	158410000	142570000	188590000	143160000	176930000	166140000	142020000	156560000	158430000	168110000	149490000	157670000	222970000
Q9D3L3	Synaptosomal-associated protein;Synaptosomal-associated protein 23	Snap23	7	36717000	39328000	35693000	37729000	40409000	41686000	29555000	41933000	33171000	35280000	42109000	39910000	38783000	35241000	42498000	44108000
Q9D8S9	BolA-like protein 1	Bola1	7	55384000	48341000	47017000	43595000	40178000	49774000	41866000	49461000	52367000	41206000	53491000	48552000	40705000	45537000	48853000	48835000
Q9D967	Magnesium-dependent phosphatase 1	Mdp1	7	39338000	48828000	41555000	40378000	45169000	36154000	33667000	39985000	44773000	39096000	46891000	44454000	41377000	42521000	41892000	46177000
Q9DAR7	m7GpppX diphosphatase	Dcps	7	61372000	54269000	54303000	60129000	55116000	69200000	41076000	61697000	48886000	52214000	48480000	60688000	46526000	45572000	54585000	78486000
Q9DB15	39S ribosomal protein L12, mitochondrial	Mrpl12	7	90504000	86746000	93729000	82516000	89529000	116840000	86098000	91064000	98434000	92251000	96461000	102610000	92994000	102510000	96704000	107370000
Q9DB27-2	Malignant T-cell-amplified sequence 1	Mcts1	7	67661000	59639000	53504000	63586000	62323000	72756000	48578000	65763000	57941000	57800000	59669000	64891000	57404000	56796000	63216000	81226000
Q9DCY0	Glycine N-acyltransferase-like protein Keg1	Keg1	7	5645600	6773000	2253200	4987600	15426000	2374900	26863000	6676100	6807200	11511000	2733100	5089800	9580900	9224300	21855000	7710200
Q9DD20	Methyltransferase-like protein 7B	Mettl7b	7	22346000	27952000	29623000	27859000	31658000	18367000	57603000	19383000	29728000	33056000	24408000	21507000	28750000	30978000	21289000	13852000
Q9EQ06	Estradiol 17-beta-dehydrogenase 11	Hsd17b11	7	23182000	40387000	32085000	46603000	54256000	23341000	50123000	51565000	39123000	45724000	40275000	36892000	44541000	36704000	50664000	27369000
Q9JIK9	28S ribosomal protein S34, mitochondrial	Mrps34	7	18064000	19976000	14291000	15850000	18241000	18047000	14222000	14866000	15798000	18026000	13199000	17376000	17682000	12866000	19177000	24497000
Q9JIY5	Serine protease HTRA2, mitochondrial	Htra2	7	14002000	23198000	20520000	20224000	23834000	19308000	22649000	21479000	20756000	20670000	18385000	28128000	23600000	19019000	26817000	25434000
Q9JJU8	SH3 domain-binding glutamic acid-rich-like protein	Sh3bgrl	7	105500000	90910000	85434000	83836000	89312000	104930000	80822000	105260000	83279000	77154000	105170000	97538000	92268000	98612000	93693000	109840000
Q9JK38	Glucosamine 6-phosphate N-acetyltransferase	Gnpnat1	7	223300000	148570000	129170000	147630000	113870000	103130000	122240000	156710000	148400000	138990000	108490000	132130000	124960000	138930000	147620000	211380000
Q9R0A0	Peroxisomal membrane protein PEX14	Pex14	7	21288000	31982000	32096000	29708000	27710000	26883000	29285000	29449000	32569000	34884000	29560000	35963000	27666000	26885000	28995000	23938000
Q9R0P5	Destrin	Dstn	7	39129000	43355000	65918000	49977000	62398000	56187000	67405000	65867000	65541000	63000000	60888000	60861000	66603000	60883000	71144000	58608000
Q9WU79	Proline dehydrogenase 1, mitochondrial	Prodh	7	9811100	16037000	12504000	8845700	6651400	7355100	35389000	11882000	13313000	17004000	9931100	8322600	12540000	15323000	14610000	10323000
Q9WUR9	Adenylate kinase 4, mitochondrial	Ak4	7	16508000	19853000	19264000	15914000	15487000	19017000	21963000	15041000	21341000	20837000	14564000	15733000	17752000	20749000	16373000	17947000
Q9WVJ2	26S proteasome non-ATPase regulatory subunit 13	Psmd13	7	11964000	12351000	16511000	20136000	15141000	8924000	22433000	17704000	12097000	17356000	11702000	12853000	12790000	14687000	13100000	11749000
Q9WVQ5	Methylthioribulose-1-phosphate dehydratase	Apip	7	58737000	72650000	56399000	58844000	61019000	59539000	42988000	60530000	60794000	68429000	63983000	67384000	72275000	53099000	59161000	72598000
Q9Z0J0	Epididymal secretory protein E1	Npc2	7	146090000	113690000	103010000	110180000	111010000	157310000	103290000	107330000	125150000	97838000	153050000	123040000	125560000	141160000	130510000	138920000
Q9Z1A1	TFG protein	Tfg	7	31467000	34542000	35794000	30926000	39506000	29391000	31684000	37031000	38552000	37505000	41156000	38027000	26243000	35467000	33936000	46919000
Q9Z1J3	Cysteine desulfurase, mitochondrial	Nfs1	7	6210100	5927100	11556000	9283300	9235700	12427000	11403000	13037000	12920000	6339500	9468700	13693000	13136000	10645000	15675000	21777000
Q9Z2A9	Gamma-glutamyltransferase 5;Gamma-glutamyltransferase 5 heavy chain;Gamma-glutamyltransferase 5 light chain	Ggt5	7	31374000	28482000	32089000	29985000	25501000	34088000	26145000	32154000	27755000	28021000	29963000	35147000	27371000	25588000	22037000	37149000
Q9Z2X1	Heterogeneous nuclear ribonucleoprotein F;Heterogeneous nuclear ribonucleoprotein F, N-terminally processed	Hnrnpf	7	58164000	48444000	60234000	44713000	53559000	50027000	61456000	46289000	50451000	53991000	45158000	55206000	57421000	51514000	58510000	54118000
Z4YJT3	La-related protein 1	Larp1	7	7800800	6865000	5931800	8007500	5706000	5010800	7298900	5308300	5186000	5775800	6858900	7290500	5597000	5099600	6042700	7411300
A0A0B4J1G1	Low affinity immunoglobulin gamma Fc region receptor II	Fcgr2b;Fcgr2	6	54257000	62076000	73748000	76349000	63289000	66946000	58336000	62759000	62455000	54531000	114560000	70992000	41589000	62232000	52689000	48854000
A0A0R4J005	LIM and senescent cell antigen-like-containing domain protein 1;LIM and senescent cell antigen-like-containing domain protein 2	Lims1;Lims2	6	34106000	25381000	39145000	26907000	29108000	44660000	27038000	31467000	29856000	28785000	33596000	30539000	28321000	27594000	24446000	31620000
A0A0R4J1F6	UDP-N-acetylhexosamine pyrophosphorylase;UDP-N-acetylgalactosamine pyrophosphorylase;UDP-N-acetylglucosamine pyrophosphorylase	Uap1	6	38395000	28896000	27795000	26674000	27126000	19021000	26299000	31158000	26420000	22434000	24022000	28658000	26624000	26535000	32961000	28713000
A0A1B0GQU8	60S ribosomal protein L18	Rpl18	6	182260000	154520000	142740000	126360000	179660000	125940000	193440000	126190000	130120000	143390000	125880000	168640000	158290000	132820000	197900000	175350000
A0A1L1SRE8	Low-density lipoprotein receptor	Ldlr	6	12318000	22085000	15823000	13191000	16717000	14374000	13672000	21432000	16734000	13600000	11596000	21855000	13530000	14788000	14272000	18733000
A0A2I3BQF4	60S ribosomal protein L30	Rpl30	6	264020000	199690000	185750000	179700000	213550000	212600000	178340000	218680000	199120000	172640000	198590000	197050000	189400000	177900000	192290000	243510000
A0A338P786	Ubiquitin-conjugating enzyme E2 L3	Ube2l3	6	46001000	67664000	68125000	66410000	69715000	52740000	66179000	52721000	66844000	72640000	66124000	78345000	62922000	62574000	76023000	64080000
A0A3Q4L347	Cysteine dioxygenase type 1	Cdo1	6	20590000	40286000	48437000	42915000	41443000	25478000	37676000	56117000	53473000	39492000	55736000	47865000	40346000	33587000	61074000	22125000
A2AQN5	Acetyl-coenzyme A synthetase, cytoplasmic	Acss2	6	14429000	18821000	19771000	21743000	788762	997042	29754000	809263	18700000	23400000	11971000	12477000	17052000	20228000	15900000	16253000
B1AZ15	Cordon-bleu protein-like 1	Cobll1	6	5685600	8524200	5089600	3997300	6112000	6176400	5298600	5094300	3988900	3824200	7124200	5713500	5938200	5055700	7729900	5921300
D3YUK4	NADH dehydrogenase [ubiquinone] 1 beta subcomplex subunit 10	Ndufb10	6	49280000	89643000	102720000	107170000	95147000	91465000	66696000	106100000	75696000	101610000	73072000	127640000	114420000	72914000	111890000	107000000
D3YZZ5	Transmembrane p24 trafficking protein 7	Tmed7	6	63493000	55601000	58782000	59528000	73685000	63705000	53048000	56521000	56098000	62081000	68354000	65554000	66005000	58590000	51085000	52366000
D3Z600	Peroxisomal targeting signal 1 receptor	Pex5	6	5094700	6629300	6125200	7625300	5867200	997042	6272000	7392700	6966300	8498500	5254000	8152900	6456000	4627000	9076100	4520700
D3Z7C0	39S ribosomal protein L40, mitochondrial	Mrpl40	6	28320000	31418000	24572000	25609000	25693000	33519000	24310000	31530000	25390000	28137000	28307000	33545000	30864000	29843000	27085000	44011000
E9Q715	Putative RNA-binding protein Luc7-like 2	Luc7l2	6	21337000	26175000	21571000	23814000	25466000	28036000	20805000	22085000	22650000	27392000	27380000	21493000	25799000	25894000	27881000	27104000
G3UWC2	N-acetylated-alpha-linked acidic dipeptidase 2	Naalad2	6	15872000	11009000	9295500	10332000	10504000	14759000	10303000	11141000	10372000	12201000	10950000	9074700	10409000	10678000	11430000	13200000
G5E850	Cytochrome b5	Cyb5a	6	2733100000	3055700000	3507700000	3052000000	3294100000	2746500000	3321700000	3262100000	3180400000	2976400000	3604100000	3212400000	2888600000	2700000000	2828700000	1928000000
H3BJ30	Cleavage and polyadenylation specificity factor subunit 6	Cpsf6	6	37732000	31493000	30860000	27922000	27202000	32395000	28877000	31310000	29661000	26668000	36777000	33887000	29303000	32423000	29317000	38639000
H3BKM0	AP complex subunit beta;AP-2 complex subunit beta	Ap2b1	6	8182500	10233000	8067200	8553100	10401000	3749900	20304000	809263	10020000	6723600	9421000	9054700	8208800	6512100	7971300	10580000
H7BWY6	Retinol-binding protein 4	Rbp4	6	119630000	150380000	115810000	121210000	147350000	149630000	130690000	157540000	126290000	133550000	135430000	163000000	151840000	167630000	137580000	139310000
O08583	THO complex subunit 4;Aly/REF export factor 2	Alyref;Alyref2	6	52346000	42498000	47348000	47907000	46884000	62094000	42631000	52299000	38302000	38126000	45381000	47146000	42703000	46501000	42756000	50209000
O08914	Fatty-acid amide hydrolase 1	Faah	6	6102400	8919800	9602000	10204000	8940500	6334800	18862000	5313900	9297700	10548000	7258000	9186500	7323200	7599200	8008600	5914000
O08997	Copper transport protein ATOX1	Atox1	6	620880000	600450000	500090000	477680000	468380000	540360000	452660000	544280000	543740000	491780000	583040000	507890000	459010000	547590000	511940000	494930000
O70251	Elongation factor 1-beta	Eef1b;Eef1b2	6	122180000	163400000	184610000	156560000	226340000	224390000	198970000	213000000	168830000	171960000	179270000	220760000	212980000	176320000	212170000	219480000
O88451	Retinol dehydrogenase 7	Rdh7	6	213280000	224240000	229060000	250680000	282600000	179870000	306870000	194310000	245770000	305400000	196530000	227930000	228540000	209990000	237860000	161620000
O88668	Protein CREG1	Creg1	6	194840000	276990000	227130000	279740000	286550000	250910000	240620000	295560000	279190000	227370000	313590000	312270000	318950000	279730000	302350000	365410000
P06797	Cathepsin L1;Cathepsin L1 heavy chain;Cathepsin L1 light chain	Ctsl	6	54765000	41460000	42456000	44031000	48448000	74926000	36246000	55243000	44773000	33412000	54679000	52462000	49321000	56802000	51699000	62894000
P08030	Adenine phosphoribosyltransferase	Aprt	6	43353000	22660000	23396000	35878000	30033000	47308000	26782000	36248000	29706000	23917000	38631000	29515000	34035000	35563000	30911000	54655000
P08228	Superoxide dismutase [Cu-Zn]	Sod1	6	9903900000	10027000000	8992700000	9159400000	8884600000	9654000000	8337000000	8863000000	10641000000	8445600000	10825000000	9197100000	8838400000	9657300000	9073000000	8723800000
P11688	Integrin alpha-5;Integrin alpha-5 heavy chain;Integrin alpha-5 light chain	Itga5	6	18344000	21067000	25104000	22144000	21812000	35259000	26920000	23098000	21083000	20602000	26259000	26548000	24322000	25715000	27472000	27534000
P12790	Cytochrome P450 2B9	Cyp2b9	6	8337600	14126000	11838000	14736000	13722000	14269000	41431000	12023000	12399000	12219000	9082200	11795000	13876000	8550300	649718	752936
P14576	Signal recognition particle 54 kDa protein	Srp54;Srp54c	6	12212000	19015000	22717000	14573000	20403000	13335000	19831000	20710000	18831000	21653000	16922000	20882000	20860000	18209000	21418000	20970000
P26883	Peptidyl-prolyl cis-trans isomerase FKBP1A	Fkbp1a	6	144070000	125160000	112030000	118720000	142910000	158720000	117340000	121280000	126640000	106910000	147170000	136100000	125780000	123690000	133560000	160270000
P28651	Carbonic anhydrase-related protein	Ca8	6	61892000	62001000	55539000	62395000	56495000	64710000	54542000	74615000	57603000	60603000	55941000	55258000	60224000	54016000	79881000	66322000
P32883-2	GTPase KRas;GTPase KRas, N-terminally processed	Kras;Hras	6	50900000	48903000	46400000	45393000	47089000	48369000	42887000	46808000	46877000	38423000	54273000	48813000	41379000	42287000	50022000	56632000
P34884	Macrophage migration inhibitory factor	Mif	6	1312600000	1154400000	1299200000	1749300000	1346300000	1885600000	1163400000	1715700000	1561100000	1411600000	1550500000	1609700000	1613600000	1686500000	1530000000	2021100000
P35979	60S ribosomal protein L12	Rpl12	6	473620000	387570000	349950000	344250000	422670000	409330000	336120000	410740000	367300000	383230000	339310000	423610000	406470000	353100000	395090000	393700000
P40630-2	Transcription factor A, mitochondrial	Tfam	6	66329000	71017000	71052000	69226000	60135000	71282000	63604000	77073000	73886000	64429000	77286000	72321000	64662000	74550000	63522000	61309000
P43274	Histone H1.4	Hist1h1e	6	199020000	314100000	261020000	314980000	189600000	274100000	246990000	195830000	160630000	372000000	142410000	408820000	485830000	296950000	209260000	108380000
P49586	Choline-phosphate cytidylyltransferase A	Pcyt1a	6	28595000	44078000	39476000	38000000	35216000	33523000	32897000	33327000	33081000	39575000	33288000	39409000	38203000	34162000	37476000	42680000
P52843	Bile salt sulfotransferase 1	Sult2a1	6	17402000	21084000	26644000	45795000	14328000	997042	92243000	6164200	11665000	27958000	845111	19949000	780402	17056000	649718	752936
P60766	Cell division control protein 42 homolog	Cdc42	6	263060000	257050000	237260000	242080000	255160000	259050000	221000000	254270000	222180000	222060000	279230000	249510000	238250000	233450000	246430000	294860000
P62075	Mitochondrial import inner membrane translocase subunit Tim13	Timm13	6	424340000	454960000	373010000	434350000	490360000	512490000	467810000	484970000	453760000	422380000	499930000	472430000	524010000	485460000	501400000	643250000
P62137	Serine/threonine-protein phosphatase PP1-alpha catalytic subunit	Ppp1ca	6	78001000	68562000	63204000	66919000	57687000	79765000	62280000	70578000	75288000	67738000	74476000	60634000	56732000	69548000	55904000	71474000
P62334	26S protease regulatory subunit 10B	Psmc6	6	16848000	17879000	19182000	17590000	21903000	12077000	25250000	18516000	17399000	24059000	13462000	19765000	19851000	17500000	19120000	21236000
P62814	V-type proton ATPase subunit B, brain isoform	Atp6v1b2	6	13011000	9853900	19752000	17603000	19605000	15586000	18367000	16913000	17713000	19461000	13933000	19309000	21720000	19150000	20764000	16254000
P62830	60S ribosomal protein L23	Rpl23	6	113910000	84515000	78948000	85245000	101030000	90983000	96144000	109450000	91593000	80719000	76791000	82106000	88219000	80062000	110600000	103890000
P62897	Cytochrome c, somatic	Cycs	6	939310000	1075600000	843320000	740240000	977530000	1187700000	797010000	966620000	879930000	924930000	1066900000	771960000	1125400000	965890000	931170000	1388000000
P63276	40S ribosomal protein S17	Rps17	6	293960000	298680000	240410000	229310000	289840000	301020000	209320000	263050000	237830000	221780000	254370000	282470000	282870000	238310000	281650000	309690000
P63325	40S ribosomal protein S10	Rps10	6	666260000	602680000	603150000	610420000	735680000	671670000	520780000	665690000	603560000	596550000	625520000	675050000	665650000	641120000	657390000	801190000
P67871	Casein kinase II subunit beta	Csnk2b	6	28131000	30820000	31660000	24453000	25350000	28241000	26461000	27563000	27053000	27931000	28677000	23535000	24841000	28719000	24801000	23151000
P68254-2	14-3-3 protein theta	Ywhaq	6	62396000	49524000	63195000	46917000	54874000	58721000	56610000	49290000	55207000	52563000	50281000	60621000	47220000	52299000	60299000	68239000
P68510	14-3-3 protein eta	Ywhah	6	17905000	21263000	28107000	27249000	26110000	24317000	28297000	19095000	29435000	28525000	22018000	26467000	28444000	27879000	26459000	17820000
P70158	Acid sphingomyelinase-like phosphodiesterase 3a	Smpdl3a	6	27417000	33788000	21652000	26286000	29287000	24320000	18785000	31499000	21267000	27700000	27552000	35386000	25051000	27998000	27034000	36786000
P97450	ATP synthase-coupling factor 6, mitochondrial	Atp5j	6	1170400000	1076800000	1004400000	995850000	1242500000	1387900000	1060200000	1098200000	1153100000	870810000	1219400000	1026100000	1114000000	1139800000	1056800000	1266200000
P97855	Ras GTPase-activating protein-binding protein 1	G3bp1	6	32375000	39251000	42010000	28552000	41655000	34325000	37664000	35768000	33526000	33457000	36498000	38521000	33280000	33412000	33436000	27805000
P97865	Peroxisomal targeting signal 2 receptor	Pex7	6	29083000	29354000	26699000	28551000	27585000	25041000	24317000	28561000	32774000	30070000	29028000	27351000	24274000	22157000	24166000	24047000
P99025	GTP cyclohydrolase 1 feedback regulatory protein	Gchfr	6	1010600000	799620000	636200000	793710000	570110000	726400000	561390000	727550000	834060000	737820000	742620000	759950000	612030000	648130000	627260000	828540000
Q00897	Alpha-1-antitrypsin 1-4	Serpina1d	6	56646000	72566000	115670000	100730000	97821000	97019000	119400000	95554000	101470000	115620000	81188000	105140000	97977000	85012000	101030000	86682000
Q00PI9	Heterogeneous nuclear ribonucleoprotein U-like protein 2	Hnrnpul2	6	21099000	20518000	26366000	21161000	26184000	25626000	22652000	18700000	21362000	27658000	24213000	23785000	25888000	26633000	24718000	22510000
Q06185	ATP synthase subunit e, mitochondrial	Atp5i;Atp5k	6	315820000	385790000	322500000	309480000	401160000	353450000	357490000	383020000	349050000	393740000	380910000	363160000	395150000	346490000	358290000	337290000
Q06770	Corticosteroid-binding globulin	Serpina6	6	50705000	45781000	49899000	56700000	25457000	48244000	36099000	32947000	44197000	47643000	35149000	49459000	35180000	33237000	29683000	40662000
Q20BD0	Heterogeneous nuclear ribonucleoprotein A/B	Hnrnpab	6	62634000	68297000	85120000	69006000	68281000	74792000	84217000	79858000	84148000	71112000	80570000	95965000	76036000	76125000	79336000	90477000
Q3TAI4	Tumor protein D54	Tpd52l2	6	82741000	61493000	74612000	84831000	75930000	80166000	68124000	87027000	77035000	78937000	73192000	80888000	69832000	66884000	73364000	80714000
Q3TF41	Nucleosome assembly protein 1-like 1	Nap1l1	6	70468000	65295000	67211000	71418000	66651000	79450000	61412000	78528000	59187000	64974000	71752000	80407000	57949000	70358000	79217000	100370000
Q3THE2	Myosin regulatory light chain 12B	Myl12b	6	78771000	69367000	93867000	80722000	64807000	91232000	69899000	87166000	78484000	94531000	83596000	97675000	82552000	72754000	70228000	78438000
Q505F5	Leucine-rich repeat-containing protein 47	Lrrc47	6	14716000	21469000	26932000	30692000	27574000	34387000	31863000	24362000	21861000	32004000	23516000	37804000	28866000	26372000	29225000	29320000
Q59J78	Mimitin, mitochondrial	Ndufaf2	6	12243000	13213000	14641000	15042000	14459000	16048000	14398000	12650000	13589000	13235000	14218000	12329000	13628000	14867000	15644000	15140000
Q5RKN9	F-actin-capping protein subunit alpha-1	Capza1	6	37696000	29687000	42605000	47401000	38209000	32282000	38292000	41871000	36329000	48170000	39375000	41892000	34645000	39315000	46392000	43253000
Q60865	Caprin-1	Caprin1	6	42379000	64240000	64285000	54866000	55477000	46306000	52702000	59177000	50102000	53357000	52003000	68951000	49272000	45939000	65427000	75410000
Q61249	Immunoglobulin-binding protein 1	Igbp1	6	12022000	13320000	13733000	13586000	14678000	13700000	11936000	16689000	9536900	11223000	9801000	11380000	13411000	11234000	8883900	9093700
Q62165	Dystroglycan;Alpha-dystroglycan;Beta-dystroglycan	Dag1	6	21728000	26976000	22718000	16946000	22174000	21640000	19411000	17286000	20439000	18153000	29991000	19729000	13798000	19727000	17034000	22074000
Q64433	10 kDa heat shock protein, mitochondrial	Hspe1;Cpn10-rs1	6	3882200000	3199600000	2828400000	3334700000	3637600000	4598200000	3092100000	3952900000	3752000000	3008800000	3724200000	3457500000	3718000000	3753700000	3881100000	4756200000
Q64435	UDP-glucuronosyltransferase 1-6	Ugt1a6	6	3974000	10542000	9539600	5713700	6454400	997042	29572000	7449400	7819700	8082000	7389700	12031000	10222000	8464000	12627000	7714400
Q6P8U6	Pancreatic triacylglycerol lipase	Pnlip	6	40138000	822315	809843	763642	788762	24318000	865364	16248000	15329000	15009000	845111	766673	15068000	24283000	649718	752936
Q6PE01	U5 small nuclear ribonucleoprotein 40 kDa protein	Snrnp40	6	16377000	12789000	18946000	24962000	14170000	22968000	15313000	18615000	15556000	18360000	17776000	18848000	18393000	16955000	20728000	18742000
Q76MZ3	Serine/threonine-protein phosphatase 2A 65 kDa regulatory subunit A alpha isoform;Serine/threonine-protein phosphatase 2A 65 kDa regulatory subunit A beta isoform	Ppp2r1a;Ppp2r1b	6	7189600	8953300	13544000	10625000	10802000	8208000	17277000	10295000	10317000	12335000	7339300	13625000	11386000	9472000	11521000	7728700
Q8BFR4	N-acetylglucosamine-6-sulfatase	Gns	6	34639000	31862000	27407000	34525000	35794000	37575000	29981000	38995000	28909000	27338000	36866000	36865000	35702000	35361000	38871000	46673000
Q8BH80	Vesicle-associated membrane protein-associated protein B	Vapb	6	38610000	47095000	47535000	36714000	42788000	34585000	39097000	41259000	41152000	53457000	36916000	44919000	35319000	41518000	42003000	28984000
Q8BYC6	Serine/threonine-protein kinase TAO3	Taok3	6	7560000	15278000	21010000	13814000	16672000	9911600	19898000	9716100	10694000	11884000	21108000	17620000	15832000	15894000	15503000	9171300
Q8C0C7	Phenylalanine--tRNA ligase alpha subunit	Farsa	6	8096900	18758000	15097000	17915000	15355000	10980000	16544000	20329000	12112000	13522000	13745000	13692000	13476000	9797200	20407000	14881000
Q8C166	Copine-1	Cpne1	6	40094000	34444000	34280000	35512000	34472000	38858000	32945000	38036000	32835000	33826000	39157000	34757000	35840000	32803000	35088000	46326000
Q8CAP3	UV excision repair protein RAD23 homolog A	Rad23a	6	22567000	22418000	15339000	20272000	22527000	16241000	17609000	21653000	17293000	16053000	17460000	20109000	19089000	17826000	17942000	20421000
Q8CG72	Poly(ADP-ribose) glycohydrolase ARH3	Adprhl2	6	20134000	18815000	17564000	18882000	20483000	20068000	17132000	20763000	22659000	18180000	21362000	18489000	21082000	19021000	18755000	20866000
Q8JZQ9	Eukaryotic translation initiation factor 3 subunit B	Eif3b	6	12137000	14186000	20753000	14293000	17829000	16501000	20743000	13108000	15084000	16853000	14189000	13897000	15353000	16080000	18100000	16622000
Q8N7N5	DDB1- and CUL4-associated factor 8	Dcaf8	6	12134000	5684900	8643500	6803800	10001000	10579000	8373900	9506300	7314500	9182300	10078000	6682600	9582500	9917000	8126800	7896000
Q8R2K3	Single-stranded DNA-binding protein;Single-stranded DNA-binding protein, mitochondrial	Ssbp1	6	40781000	45226000	34504000	39941000	46954000	48609000	36632000	49786000	38577000	44383000	47262000	52791000	56001000	45946000	42876000	48286000
Q8R3P0	Aspartoacylase	Aspa	6	16992000	18262000	15583000	17116000	13598000	15270000	16177000	18670000	17417000	19122000	19205000	14633000	15235000	19675000	8846400	12648000
Q8R5I6	Glutathione S-transferase Mu 4	Gstm4	6	33854000	41253000	39543000	41435000	30519000	23721000	37281000	35409000	41329000	48216000	25497000	35257000	35120000	34546000	33105000	25649000
Q8VE22	28S ribosomal protein S23, mitochondrial	Mrps23	6	24928000	24612000	24027000	24136000	27172000	27280000	23797000	27581000	26243000	25561000	26824000	26370000	26656000	23276000	28710000	36176000
Q8VE38-2	Oxidoreductase NAD-binding domain-containing protein 1	Oxnad1	6	19640000	16256000	15192000	15244000	9610900	13235000	12858000	16818000	16198000	14626000	12385000	14765000	13365000	13775000	15593000	14809000
Q8VE95	UPF0598 protein C8orf82 homolog		6	31317000	33894000	26967000	26011000	26027000	25435000	23701000	26050000	28143000	25190000	30588000	28370000	28461000	28368000	28369000	37681000
Q8VEB4	Group XV phospholipase A2	Pla2g15	6	19791000	14179000	14718000	14850000	15823000	18737000	15448000	21108000	17094000	15249000	18088000	19155000	17245000	17420000	16510000	12653000
Q91VT4	Carbonyl reductase family member 4	Cbr4	6	53489000	64438000	82637000	78393000	79058000	66251000	81457000	87896000	99973000	86315000	80615000	88904000	92293000	82788000	94480000	78253000
Q91WC0	Histone-lysine N-methyltransferase setd3	Setd3	6	25659000	20493000	17154000	20998000	20900000	24738000	16365000	23704000	20530000	24003000	21436000	18669000	18680000	20689000	20844000	24234000
Q91WM2	Cat eye syndrome critical region protein 5 homolog	Cecr5	6	15995000	18985000	19582000	18264000	15239000	10621000	19305000	17924000	20425000	17399000	15726000	18464000	20658000	18519000	21738000	10726000
Q922Y1	UBX domain-containing protein 1	Ubxn1	6	16369000	22687000	21683000	19707000	22820000	20787000	21464000	18794000	16122000	15991000	19673000	18494000	18546000	15809000	19542000	16492000
Q99KF1	Transmembrane emp24 domain-containing protein 9	Tmed9	6	39889000	38178000	43567000	41584000	60816000	45083000	40970000	39213000	32631000	39218000	49917000	42468000	40866000	37490000	43485000	39201000
Q9CPT4	Myeloid-derived growth factor	Mydgf	6	196230000	143580000	152150000	134170000	144160000	170770000	131470000	141580000	144930000	123780000	191950000	139230000	131490000	150150000	134830000	157600000
Q9CQ60	6-phosphogluconolactonase	Pgls	6	14868000	21740000	24538000	24465000	22356000	15108000	29077000	20040000	25178000	29173000	16291000	20926000	21646000	18453000	22670000	19447000
Q9CQ92	Mitochondrial fission 1 protein	Fis1	6	77108000	75327000	56717000	67189000	62026000	68453000	64407000	62048000	57470000	57871000	62959000	67436000	73935000	57514000	69291000	75758000
Q9CQH7	Transcription factor BTF3 homolog 4	Btf3l4	6	49096000	66152000	61853000	62961000	63344000	66773000	56528000	60525000	49076000	59971000	69610000	74926000	52741000	57606000	68150000	78527000
Q9CQJ6	Density-regulated protein	Denr	6	34270000	34686000	29459000	33406000	35524000	34744000	29102000	28091000	34600000	29990000	36288000	34279000	34051000	30406000	36162000	42930000
Q9CQQ7	ATP synthase F(0) complex subunit B1, mitochondrial	Atp5f1	6	53094000	78158000	72116000	68091000	79562000	54234000	107130000	57707000	70959000	74186000	52043000	71039000	82537000	76677000	63299000	66833000
Q9CQR4	Acyl-coenzyme A thioesterase 13;Acyl-coenzyme A thioesterase 13, N-terminally processed	Acot13	6	175100000	200570000	177200000	198440000	132040000	136260000	159750000	165220000	224000000	205250000	165820000	169230000	172880000	220130000	203210000	192290000
Q9CR00	26S proteasome non-ATPase regulatory subunit 9	Psmd9	6	37053000	41906000	37203000	33273000	45137000	48135000	37725000	44083000	36224000	44424000	39887000	41109000	36195000	35092000	42022000	54293000
Q9CR24	Nucleoside diphosphate-linked moiety X motif 8, mitochondrial	Nudt8	6	31559000	38715000	26113000	27210000	28805000	38670000	28036000	29744000	32308000	26296000	32899000	29363000	33260000	30380000	30830000	41963000
Q9CR35	Chymotrypsinogen B;Chymotrypsin B chain A;Chymotrypsin B chain B;Chymotrypsin B chain C	Ctrb1	6	220450000	17100000	15319000	23366000	16247000	97923000	14277000	50944000	11787000	43484000	16148000	16192000	40300000	89420000	19070000	7585300
Q9CR61	NADH dehydrogenase [ubiquinone] 1 beta subcomplex subunit 7	Ndufb7	6	16353000	29626000	35167000	40100000	33913000	36966000	22119000	30674000	28809000	36376000	23564000	41940000	41521000	30349000	36335000	28947000
Q9CXS4	Centromere protein V	Cenpv	6	87867000	83693000	68259000	68489000	86645000	89553000	82003000	95016000	45581000	63631000	75930000	72518000	93867000	84405000	78844000	89967000
Q9CXT8	Mitochondrial-processing peptidase subunit beta	Pmpcb	6	18375000	17251000	21223000	18789000	12367000	17406000	20526000	11719000	18440000	15557000	23178000	20700000	18042000	26508000	18190000	20413000
Q9CZB0	Succinate dehydrogenase cytochrome b560 subunit, mitochondrial	Sdhc	6	165620000	153110000	143640000	148620000	189780000	155370000	180150000	154340000	160450000	166880000	158620000	149430000	170850000	157610000	143560000	153660000
Q9CZE3	Ras-related protein Rab-32	Rab32	6	14789000	9809600	11777000	9348300	8429200	11043000	8573400	7662600	7357400	9586700	11034000	9155200	7582900	7701000	9025900	11495000
Q9D0F3	Protein ERGIC-53	Lman1	6	27911000	25620000	68052000	65603000	49489000	43455000	66645000	45776000	48905000	59027000	36201000	47517000	43673000	44883000	51289000	27788000
Q9D110	5-formyltetrahydrofolate cyclo-ligase	Mthfs	6	30352000	26372000	20352000	23193000	18813000	25144000	21840000	16711000	21339000	22920000	26846000	24071000	24286000	24518000	21407000	34756000
Q9D1D4	Transmembrane emp24 domain-containing protein 10	Tmed10	6	103430000	120650000	132690000	134200000	144720000	137520000	100260000	131680000	124250000	130380000	142140000	134980000	131940000	110890000	132940000	110700000
Q9D1H6	NADH dehydrogenase [ubiquinone] 1 alpha subcomplex assembly factor 4	Ndufaf4	6	16776000	14723000	16665000	17830000	20581000	24176000	20714000	25752000	23426000	19881000	18909000	21305000	25198000	23151000	19983000	22021000
Q9D358	Low molecular weight phosphotyrosine protein phosphatase	Acp1	6	86703000	79168000	60115000	52030000	66537000	58415000	46577000	66007000	58830000	60754000	79849000	52574000	50754000	62846000	47862000	68962000
Q9D3D9	ATP synthase subunit delta, mitochondrial	Atp5d	6	421250000	472330000	460210000	422980000	530620000	487560000	503950000	466270000	484250000	393160000	455850000	510020000	503990000	487430000	514430000	540070000
Q9D6U8	Protein FAM162A	Fam162a	6	89899000	102530000	95683000	77617000	93120000	114890000	92634000	103390000	101440000	94957000	113540000	101690000	89221000	89819000	101590000	127170000
Q9D6Z1	Nucleolar protein 56	Nop56	6	7209600	7933900	10348000	8591700	6616500	8343600	8790700	809263	12773000	7581100	11560000	10982000	14670000	8430200	9106600	8311500
Q9D7X8	Gamma-glutamylcyclotransferase	Ggct	6	40226000	23870000	21050000	21837000	25447000	29325000	21016000	27657000	25898000	23708000	24140000	19340000	23563000	21940000	23462000	26436000
Q9D881	Cytochrome c oxidase subunit 5B, mitochondrial	Cox5b	6	143420000	189470000	244570000	275380000	210540000	256620000	168200000	251510000	207570000	235080000	186730000	272690000	241360000	179610000	265030000	186820000
Q9DAU1	Protein canopy homolog 3	Cnpy3	6	35873000	34375000	35734000	32725000	33825000	34641000	34549000	35379000	33408000	28475000	34164000	34274000	28002000	29976000	34027000	33313000
Q9DBG1	Sterol 26-hydroxylase, mitochondrial	Cyp27a1	6	893126	7976800	2578800	7337600	10499000	3897600	51895000	8565200	9002100	8318200	9234900	2376700	9375600	7984800	12521000	8102900
Q9DCC7	Isochorismatase domain-containing protein 2B, mitochondrial	Isoc2b	6	41212000	46676000	39776000	45842000	42402000	52091000	43928000	50769000	44991000	43022000	41949000	56209000	45301000	39288000	53130000	59065000
Q9ET26	E3 ubiquitin-protein ligase RNF114	Rnf114	6	11548000	10944000	10294000	9895400	10545000	9690700	9276900	11653000	11366000	8852200	10158000	9034800	11436000	11034000	10665000	9777100
Q9JIW9	Ras-related protein Ral-B	Ralb	6	48099000	54593000	49532000	54569000	54473000	61447000	47062000	51972000	43666000	49968000	56460000	57522000	50194000	46982000	59490000	60990000
Q9JJI8	60S ribosomal protein L38	Rpl38	6	234300000	194370000	191170000	185330000	201440000	210820000	178790000	200800000	179630000	190890000	194190000	189440000	203120000	167520000	199480000	237700000
Q9JKB1	Ubiquitin carboxyl-terminal hydrolase isozyme L3;Ubiquitin carboxyl-terminal hydrolase isozyme L4	Uchl3;Uchl4	6	23746000	22515000	28415000	20654000	22722000	18061000	25928000	22864000	22946000	29418000	19287000	23188000	21537000	22270000	23126000	21308000
Q9JL35	High mobility group nucleosome-binding domain-containing protein 5	Hmgn5	6	133270000	120430000	110830000	96772000	120910000	149700000	113960000	117000000	110110000	101400000	148170000	119820000	103800000	109460000	128120000	145870000
Q9JM76	Actin-related protein 2/3 complex subunit 3	Arpc3	6	32262000	35140000	49332000	41967000	48751000	45313000	49526000	35042000	44459000	52663000	46569000	52488000	46581000	53035000	53057000	37892000
Q9QZX7-2	Serine racemase	Srr	6	16782000	23997000	22913000	22782000	21530000	11042000	21786000	22569000	27506000	23026000	21933000	24893000	25546000	23189000	23261000	19939000
Q9R1Z7	6-pyruvoyl tetrahydrobiopterin synthase	Pts	6	52811000	57248000	51044000	48306000	37476000	45455000	33900000	48984000	52750000	46796000	54888000	51930000	38839000	42816000	40848000	48898000
Q9WTM5	RuvB-like 2	Ruvbl2	6	13147000	12029000	15645000	17076000	15135000	14992000	17005000	14455000	17205000	17643000	11616000	16456000	16895000	15861000	18965000	12622000
Q9WU28	Prefoldin subunit 5	Pfdn5	6	33774000	35232000	31760000	34241000	31223000	37801000	29800000	36431000	32572000	29572000	38757000	38470000	36907000	38494000	33421000	46721000
Q9WUK2-2	Eukaryotic translation initiation factor 4H	Eif4h	6	65750000	61024000	75499000	76822000	80400000	76244000	69859000	82474000	77516000	69165000	78045000	94985000	63574000	70807000	77855000	83914000
Q9WV85	Nucleoside diphosphate kinase 3	Nme3	6	37638000	37414000	31626000	29507000	32788000	34664000	29397000	34784000	33137000	26938000	31966000	35458000	26530000	25794000	34984000	37621000
Q9WVE8	Protein kinase C and casein kinase substrate in neurons protein 2	Pacsin2	6	25630000	35280000	34342000	31162000	24263000	33552000	31997000	26383000	27101000	20141000	33822000	30391000	30057000	23620000	24531000	23812000
Q9Z0K8	Pantetheinase	Vnn1	6	4035700	33251000	17892000	21648000	22174000	4955900	17142000	12373000	15407000	28790000	19930000	30892000	17896000	27314000	16084000	752936
A0A087WQE6	Transcription elongation factor B polypeptide 1	Tceb1	5	32492000	29931000	35800000	29249000	28696000	31567000	32183000	25751000	31215000	34037000	29499000	28358000	36966000	33289000	35657000	26537000
A0A087WRN1	Bcl-2-associated transcription factor 1	Bclaf1	5	10133000	13239000	13202000	9174100	13447000	14104000	10190000	10509000	11338000	10827000	14347000	13142000	11024000	13090000	12386000	13385000
A0A0J9YUS5	Eukaryotic translation initiation factor 4 gamma 1	Eif4g1	5	8620300	17771000	12312000	11537000	9325300	7229100	18070000	9311000	7353200	5629900	14356000	10663000	9287300	8161200	9566500	8003700
A0A0J9YVG0	Protein phosphatase 1G	Ppm1g	5	893126	17010000	9069700	18012000	14744000	14850000	13209000	15596000	12158000	11908000	14324000	17168000	13041000	878568	13219000	21149000
A0A0N4SUN2	Solute carrier organic anion transporter family member 1B2	Slco1b2	5	24364000	34598000	38279000	31712000	45620000	18371000	60702000	19186000	26419000	44383000	32559000	30325000	35713000	28585000	42027000	19439000
A0A0R4J131	Biotinidase	Btd	5	18112000	16445000	23890000	20356000	26037000	16931000	20267000	19602000	21007000	26952000	16078000	25693000	22520000	18190000	24016000	24349000
A0A0U1RNT6	S-adenosylmethionine synthase isoform type-2	Mat2a	5	43499000	40265000	48779000	44618000	57053000	55108000	42268000	54295000	60519000	53355000	50125000	53738000	46565000	54441000	48154000	40878000
A0A0U1RPL0	Ataxin-2-like protein	Atxn2l	5	39999000	36241000	36735000	24853000	28658000	34164000	38002000	22299000	23605000	23432000	44699000	25146000	26245000	35507000	25091000	27044000
A0A1W2P727	Acetolactate synthase-like protein	Ilvbl	5	12617000	9920500	11278000	9599100	9474900	11294000	11580000	13180000	10286000	12828000	8674800	13373000	15800000	14034000	8671700	12749000
A0A1W2P768	Histone H3.2;Histone H3;Histone H3.1	Hist1h3b;H3f3a;Hist1h3a	5	119470000	175240000	105890000	241210000	112920000	145710000	176620000	146760000	138720000	266620000	111260000	232490000	403320000	246540000	163500000	131190000
A0A1Y7VM38	NADH dehydrogenase [ubiquinone] iron-sulfur protein 6, mitochondrial	Ndufs6	5	76404000	118190000	148080000	142060000	126010000	135370000	94322000	128710000	118560000	131670000	110660000	158840000	135320000	109200000	167860000	121950000
A0A3Q4EH04	Serine/arginine-rich splicing factor 7	Srsf7	5	172340000	169290000	173010000	186480000	204660000	210170000	153770000	187740000	163000000	173100000	177820000	225470000	190400000	165270000	193790000	219060000
A0A494BAJ6	ADP-ribosylation factor-like protein 3	Arl3	5	34843000	27320000	26849000	34584000	25310000	39468000	21539000	33001000	26921000	27347000	33160000	31967000	24371000	26032000	23905000	43374000
A0A668KL65	Sorbin and SH3 domain-containing protein 1	Sorbs1	5	893126	12585000	11877000	10972000	11573000	12016000	13129000	11082000	11154000	16984000	10052000	14534000	12965000	9857000	14525000	12753000
A2A977	Cytochrome P450 4A10	Cyp4a10	5	2674300	4275600	2827000	6080800	12145000	997042	10934000	809263	729584	18280000	7363200	7354700	8296200	13837000	649718	3538100
A2BE93	Protein SET	Set	5	171400000	155000000	150960000	130670000	143510000	220730000	134240000	164640000	142880000	133780000	191660000	156520000	155010000	178980000	177350000	228890000
B1AWE0	Clathrin light chain A	Clta	5	39627000	37951000	47225000	26300000	51649000	44624000	35205000	41564000	36384000	38049000	36521000	57271000	35509000	23796000	37943000	44682000
B7ZC46	Septin-8	Septin8	5	21531000	17560000	19563000	14437000	17555000	27063000	22118000	14765000	19308000	16324000	17912000	17674000	12232000	27408000	14826000	10650000
D3YVW2	Golgi integral membrane protein 4	Golim4	5	8195700	9877500	8716900	7619500	8075300	10154000	4142200	6533400	7399400	9835000	8485900	10511000	10345000	9665300	7807700	10045000
D3YWS7	Fucose mutarotase	Fuom	5	97951000	77482000	63454000	76115000	61354000	119400000	57394000	81816000	71598000	62492000	73472000	84865000	72590000	74920000	62506000	146520000
D3YWT0	Signal peptidase complex catalytic subunit SEC11;Signal peptidase complex catalytic subunit SEC11A	Sec11a	5	10478000	13304000	12765000	11890000	17025000	12081000	17017000	11474000	10699000	15240000	9310800	11117000	13423000	10676000	14489000	5520500
D3Z125	Tumor protein D52	Tpd52	5	20771000	18307000	20364000	19610000	27709000	14658000	18261000	17576000	21560000	21422000	25021000	15597000	16806000	15835000	14706000	20323000
E9PVU9	Bis(5-adenosyl)-triphosphatase	Fhit	5	29972000	20131000	17164000	17436000	17765000	23617000	17233000	16182000	21330000	14502000	23776000	17074000	18729000	21741000	13399000	30993000
E9Q3B9	Monoglyceride lipase	Mgll	5	9678800	31505000	21856000	20895000	29339000	6317600	29810000	31665000	23741000	35089000	19204000	34359000	23263000	30753000	24319000	10603000
E9Q5K4-2	Cytochrome P450 2C44	Cyp2c44	5	7355200	10347000	5711200	5419600	7877000	4661100	10097000	6404100	8383200	8334900	8009500	8013300	9121200	7358000	11567000	12595000
E9QLB2	Lysophospholipase-like protein 1	Lyplal1	5	26111000	25868000	17132000	21013000	14341000	17255000	15798000	15257000	20075000	17324000	14750000	18827000	16981000	17332000	13408000	19688000
F6RJ39	Apoptotic chromatin condensation inducer in the nucleus	Acin1	5	20003000	20861000	21009000	16770000	21322000	17596000	16790000	17431000	14039000	19571000	18172000	20674000	17846000	16784000	17354000	21982000
F6TQL3	DnaJ homolog subfamily C member 8	Dnajc8	5	61952000	46513000	63272000	72656000	48545000	66142000	49534000	59488000	59362000	39436000	78522000	73621000	57342000	64784000	41644000	62463000
F6U2C2	Ataxin-2	Atxn2	5	5255200	5903300	4949900	3800000	4622700	3460900	6234700	2421800	2567400	4579400	8077100	4202800	2415500	5560800	4196800	3513300
F6UP77	Putative N-acetylglucosamine-6-phosphate deacetylase	Amdhd2	5	13031000	8721800	9102200	10392000	8124700	9754300	7767300	9443200	9943000	7994800	11162000	10550000	9240500	13426000	9659600	7940000
F6WR04	Cathepsin S	Ctss	5	114770000	62023000	68476000	82836000	70319000	86896000	56217000	67914000	57242000	54028000	103090000	78048000	63749000	74204000	82530000	98402000
F7BJK1	Protocadherin 1	Pcdh1	5	16520000	23578000	17929000	18016000	19703000	17652000	13763000	16125000	18723000	8867600	18438000	20843000	12111000	12996000	21210000	23486000
G3UX26	Voltage-dependent anion-selective channel protein 2	Vdac2	5	15882000	20294000	24042000	30846000	17536000	22699000	23563000	23722000	20446000	26613000	17927000	28902000	25315000	15001000	22501000	20642000
G3UZY2	Thioredoxin, mitochondrial	Txn2	5	400520000	369760000	327880000	401280000	328050000	526640000	363060000	465880000	418460000	332000000	435200000	410780000	366610000	394600000	493380000	614230000
O35226-2	26S proteasome non-ATPase regulatory subunit 4	Psmd4	5	32205000	31257000	41142000	37931000	40758000	38940000	39555000	47634000	47401000	48475000	47494000	46713000	39923000	45246000	45225000	41890000
O35857	Mitochondrial import inner membrane translocase subunit TIM44	Timm44	5	13934000	16790000	16756000	11373000	14555000	15196000	23775000	17135000	17365000	16496000	10109000	17084000	17840000	16015000	17758000	15589000
O35955	Proteasome subunit beta type-10	Psmb10	5	75915000	50902000	56805000	55202000	45844000	73933000	45584000	56406000	51215000	57528000	78656000	45563000	42374000	78331000	56380000	57532000
O54749	Cytochrome P450 2J5	Cyp2j5	5	7499300	7065000	7856900	7614500	5146400	5230400	77542000	9558000	8437300	10709000	6935700	32304000	7251200	6493400	9279200	9712800
O88533	Aromatic-L-amino-acid decarboxylase	Ddc	5	18290000	13105000	15849000	11042000	15194000	9865400	23923000	12466000	14802000	20656000	11593000	13173000	13779000	15420000	8293900	9742800
O89023	Tripeptidyl-peptidase 1	Tpp1	5	193180000	216070000	183280000	159110000	229310000	180880000	181710000	188050000	184690000	163650000	203660000	210770000	219930000	208070000	235720000	196530000
P01654	Immunoglobulin kappa chain V-III region PC 2880/PC 1229;Immunoglobulin kappa chain V-III region MOPC 70;Immunoglobulin kappa chain V-III region PC 7132;Immunoglobulin kappa chain V-III region 50S10.1	Igkv3-2	5	273000000	83648000	53953000	71468000	38860000	146860000	8179200	43005000	729584	47602000	64848000	38244000	29851000	52666000	649718	34667000
P03958	Adenosine deaminase	Ada	5	19634000	16116000	13734000	18008000	13110000	14847000	13314000	9694200	14508000	17141000	15446000	16656000	15531000	12462000	18539000	18560000
P11404	Fatty acid-binding protein, heart	Fabp3	5	893126	822315	809843	763642	110200000	18664000	865364	15273000	2158800	841786	845111	766673	172590000	878568	649718	752936
P11438	Lysosome-associated membrane glycoprotein 1	Lamp1	5	83325000	79594000	77816000	64789000	83567000	68896000	63196000	76044000	80761000	68461000	88814000	80960000	85726000	67243000	78271000	77283000
P13542	Myosin-8;Myosin-1	Myh8;Myh1	5	893126	822315	809843	763642	788762	997042	865364	809263	729584	841786	845111	766673	780402	878568	649718	752936
P16254	Signal recognition particle 14 kDa protein;Signal recognition particle 14 kDa protein, N-terminally processed	Srp14	5	73388000	71796000	72263000	61192000	68793000	70860000	53538000	72948000	62943000	73577000	76323000	76573000	74476000	69614000	75672000	86629000
P17918	Proliferating cell nuclear antigen	Pcna	5	17876000	13139000	15157000	16133000	15022000	19840000	12058000	16893000	17035000	14655000	14436000	16603000	12513000	15637000	14938000	19494000
P20065-2	Thymosin beta-4;Hematopoietic system regulatory peptide	Tmsb4x	5	1033100000	407000000	503140000	454790000	392950000	683690000	392780000	363970000	365680000	365790000	665140000	376100000	422600000	556490000	399380000	539310000
P23116	Eukaryotic translation initiation factor 3 subunit A	Eif3a	5	3554300	3275700	2955500	2699700	1667300	4774100	9707300	2026100	1957000	2598000	2975700	2932500	2059500	2886000	1585200	2182400
P29788	Vitronectin	Vtn	5	30301000	33386000	28347000	26666000	29800000	39209000	21411000	33190000	29680000	25887000	27622000	29008000	28376000	23109000	28453000	37564000
P30999	Catenin delta-1	Ctnnd1	5	7093400	8379400	7833700	7462400	7309200	9977900	11955000	6312200	6700900	7657500	7532800	8437200	6688500	5234600	7642200	8734000
P32067	Lupus La protein homolog	Ssb	5	22004000	22577000	22458000	21846000	18646000	21849000	18678000	20691000	20010000	23451000	22540000	26274000	25507000	21488000	21785000	22882000
P34022	Ran-specific GTPase-activating protein	Ranbp1	5	79254000	65618000	61986000	67852000	60793000	88323000	56235000	67765000	66832000	64298000	77765000	73400000	61186000	65346000	64571000	99142000
P41317	Mannose-binding protein C	Mbl2	5	112440000	79753000	74679000	92559000	91233000	96903000	68295000	78599000	80611000	84058000	113220000	97448000	66117000	73332000	88290000	113740000
P43883	Perilipin-2	Plin2	5	17604000	24042000	15607000	17056000	10958000	8720900	24858000	809263	7510200	50556000	15738000	18511000	23213000	28372000	649718	8468900
P46460	Vesicle-fusing ATPase	Nsf	5	8254400	10813000	10502000	14347000	13286000	9878100	12871000	14433000	11968000	13231000	11586000	12082000	16048000	11089000	15232000	13687000
P49710	Hematopoietic lineage cell-specific protein	Hcls1	5	15006000	8647800	10759000	10940000	8255000	11136000	7433100	7059300	8878700	9826000	13239000	6876300	7795700	9783900	9507700	9570300
P56380	Bis(5-nucleosyl)-tetraphosphatase [asymmetrical]	Nudt2	5	36982000	23826000	20449000	20897000	12788000	10690000	16495000	21850000	18205000	17536000	19990000	11039000	17018000	13602000	16275000	14814000
P56389	Cytidine deaminase	Cda	5	32234000	60483000	42066000	46573000	54077000	38525000	38960000	42174000	53610000	42482000	50342000	48391000	44162000	41115000	43429000	42608000
P56391	Cytochrome c oxidase subunit 6B1	Cox6b1	5	247900000	231910000	288090000	406860000	273430000	355780000	248620000	360330000	284090000	305730000	203800000	392220000	373930000	226220000	277130000	304390000
P56528	ADP-ribosyl cyclase/cyclic ADP-ribose hydrolase 1	Cd38	5	35102000	40780000	44636000	40809000	40043000	40500000	44861000	42519000	42414000	34151000	36419000	40115000	42365000	42926000	36817000	33512000
P60122	RuvB-like 1	Ruvbl1	5	9684500	13341000	19288000	18004000	18464000	15547000	18748000	13439000	18277000	15846000	22117000	23466000	21364000	16834000	22875000	21945000
P61027	Ras-related protein Rab-10	Rab10	5	196720000	170610000	165480000	147110000	140890000	172810000	159180000	150610000	135530000	146400000	218620000	144790000	151580000	159090000	140690000	150560000
P61087	Ubiquitin-conjugating enzyme E2 K	Ube2k	5	9599900	11903000	19645000	14118000	13744000	13722000	11420000	16713000	15388000	15748000	10713000	18763000	13377000	17973000	15727000	14547000
P61358	60S ribosomal protein L27	Rpl27	5	151830000	100410000	99449000	99935000	117140000	124860000	104210000	118420000	103470000	77956000	111300000	86387000	98184000	94979000	99632000	118430000
P61965	WD repeat-containing protein 5	Wdr5	5	9377800	6489700	7737300	6686300	8448600	11964000	8019400	6928600	7819300	5694800	10036000	9075000	9392300	8122400	5535500	8905400
P62073	Mitochondrial import inner membrane translocase subunit Tim10	Timm10	5	27958000	31151000	25510000	26434000	35310000	42546000	36696000	33487000	38783000	30036000	32608000	27127000	32778000	34359000	38215000	35974000
P62267	40S ribosomal protein S23	Rps23	5	237810000	141690000	160320000	139390000	175270000	180380000	194590000	180490000	167100000	136060000	169360000	146220000	181860000	166910000	222110000	230270000
P62317	Small nuclear ribonucleoprotein Sm D2	Snrpd2	5	63185000	48960000	50303000	48059000	58918000	62398000	43106000	57473000	43901000	47703000	51807000	56227000	55731000	50049000	47238000	57762000
P62748	Hippocalcin-like protein 1	Hpcal1	5	38203000	37564000	40143000	48558000	39600000	41815000	28455000	43895000	35864000	41384000	51550000	40248000	36600000	40247000	32679000	47896000
P62754	40S ribosomal protein S6	Rps6	5	238050000	209810000	223340000	244390000	215640000	258920000	234390000	253720000	215210000	194620000	214390000	222970000	285840000	237960000	284110000	315670000
P62774	Myotrophin	Mtpn	5	208960000	164590000	167650000	141680000	132920000	145420000	125680000	177240000	148050000	141900000	148540000	138930000	120030000	129180000	132400000	124720000
P62983	Ubiquitin-40S ribosomal protein S27a;Ubiquitin;40S ribosomal protein S27a;Ubiquitin-60S ribosomal protein L40;Ubiquitin;60S ribosomal protein L40;Polyubiquitin-B;Ubiquitin;Polyubiquitin-C;Ubiquitin;Ubiquitin-related 1;Ubiquitin-related 2	Rps27a;Gm8797;Uba52;Kxd1;Ubc;Ubb	5	1385000000	1169200000	1284500000	1163100000	1316300000	1409200000	1263400000	1297100000	1403400000	1311400000	1429800000	1208200000	1349700000	1325900000	1287200000	1311400000
P63073	Eukaryotic translation initiation factor 4E	Eif4e	5	33398000	18081000	23674000	20441000	23570000	16699000	21592000	26263000	21759000	23395000	25602000	23738000	19077000	19003000	27738000	20952000
P63328-2	Serine/threonine-protein phosphatase 2B catalytic subunit alpha isoform;Serine/threonine-protein phosphatase;Serine/threonine-protein phosphatase 2B catalytic subunit beta isoform	Ppp3ca;Ppp3cb	5	18251000	18198000	15693000	18888000	17077000	22132000	12236000	18095000	21033000	11010000	18348000	15595000	18807000	17026000	13519000	20650000
P97470	Serine/threonine-protein phosphatase 4 catalytic subunit	Ppp4c	5	27126000	27857000	24945000	15421000	19170000	29306000	20860000	23987000	16260000	24942000	23000000	23459000	13592000	21616000	21660000	35069000
P97792-2	Coxsackievirus and adenovirus receptor homolog	Cxadr	5	17909000	17000000	15040000	14722000	13274000	20347000	16265000	15568000	16096000	14669000	21836000	15007000	15916000	14972000	18353000	16650000
P97864	Caspase-7;Caspase-7 subunit p20;Caspase-7 subunit p11	Casp7	5	36169000	26567000	31981000	28739000	23162000	28952000	20577000	34262000	28898000	28367000	33781000	25859000	23837000	24087000	30590000	31198000
P99024	Tubulin beta-5 chain	Tubb5	5	45581000	54218000	59210000	67310000	73646000	56860000	83046000	51620000	46340000	56769000	61023000	59579000	50072000	52811000	59438000	60018000
Q3TXS7	26S proteasome non-ATPase regulatory subunit 1	Psmd1	5	1187000	3221500	8918900	2597100	2379500	841340	28954000	1672600	3786000	3572600	3526700	935470	2223300	8574000	2983600	752936
Q3UDS7	ADP-dependent glucokinase	Adpgk	5	13404000	12160000	11406000	11611000	12266000	12879000	13589000	12463000	10087000	10058000	13645000	12333000	11480000	11461000	11361000	12382000
Q3UHX2	28 kDa heat- and acid-stable phosphoprotein	Pdap1	5	65431000	54104000	48659000	50362000	56862000	73308000	49710000	52186000	60164000	47254000	55291000	52656000	57641000	49363000	55094000	60826000
Q3ULJ0	Glycerol-3-phosphate dehydrogenase 1-like protein	Gpd1l	5	6063000	6114600	8953300	9051000	7933200	7792300	9520000	6830600	7676000	9437800	7738700	9143600	7552400	6927900	7627800	7240900
Q3UPH1	Protein PRRC1	Prrc1	5	14376000	21000000	20870000	16875000	21413000	19165000	16965000	17746000	17284000	20137000	17396000	22409000	14138000	18709000	16310000	18244000
Q3URS9-2	Coiled-coil domain-containing protein 51	Ccdc51	5	10908000	11220000	13533000	11430000	13166000	11723000	12150000	12324000	9830300	10168000	13772000	11412000	14087000	13855000	13370000	12752000
Q3V2H3	Sorting nexin-12	Snx12	5	32350000	37182000	27164000	24150000	32318000	18206000	23028000	22855000	23115000	26638000	20514000	24175000	20608000	25086000	25532000	21389000
Q60648	Ganglioside GM2 activator	Gm2a	5	106560000	97020000	82505000	98964000	96524000	148270000	91541000	106150000	109750000	98481000	112830000	105590000	138950000	126710000	111570000	167560000
Q62086	Serum paraoxonase/arylesterase 2	Pon2	5	9789500	14218000	22102000	18761000	23449000	15735000	19464000	14508000	14593000	18245000	14471000	19890000	21212000	16064000	18338000	12284000
Q62418-3	Drebrin-like protein	Dbnl	5	14153000	10722000	13902000	10991000	11667000	11345000	12474000	10855000	10096000	10835000	13643000	11420000	14675000	13944000	11911000	8780300
Q62426	Cystatin-B	Cstb	5	336570000	275440000	313190000	284190000	272640000	328650000	230990000	289970000	294560000	257820000	347230000	290540000	255350000	287410000	264280000	316290000
Q63836	Selenium-binding protein 2	Selenbp2	5	15303000	9584100	8846400	9914100	62342000	135990000	14800000	64952000	9290300	9773300	20066000	8906000	14812000	10023000	67133000	195560000
Q64152-2	Transcription factor BTF3	Btf3	5	90223000	88275000	86205000	86718000	84100000	102140000	84467000	86178000	92486000	83006000	97790000	91753000	82292000	80391000	88874000	99526000
Q64191	N(4)-(beta-N-acetylglucosaminyl)-L-asparaginase;Glycosylasparaginase alpha chain;Glycosylasparaginase beta chain	Aga	5	36123000	35660000	31074000	28577000	35302000	33337000	22300000	37595000	35755000	20880000	37611000	31368000	36334000	35899000	40709000	45633000
Q64516-1	Glycerol kinase	Gk;Gyk	5	6682300	10523000	17391000	11977000	16713000	6387100	27781000	5567500	11188000	12280000	12188000	10999000	9890100	11741000	12679000	6080300
Q64726	Zinc-alpha-2-glycoprotein	Azgp1	5	22743000	26280000	35754000	28199000	38035000	37404000	24189000	38132000	32205000	32420000	34692000	40397000	31984000	35281000	37411000	34745000
Q6DFW4	Nucleolar protein 58	Nop58	5	4692500	5946400	5103700	5942500	6445300	4823500	7299600	3970500	5815800	5505300	4538600	7420000	6558500	6032000	7529000	7348200
Q6NS54	Na(+)/H(+) exchange regulatory cofactor NHE-RF;Na(+)/H(+) exchange regulatory cofactor NHE-RF2	Slc9a3r2	5	6086700	6381800	6297800	5002400	6201300	6500400	6144900	5072100	6186300	4585900	7061500	6517500	6023700	6304500	7926900	6726700
Q6P8J2	Diamine acetyltransferase 2	Sat2	5	31054000	28962000	30094000	28309000	34192000	35383000	28313000	45135000	29256000	20977000	28928000	27839000	28577000	27738000	24164000	34929000
Q6ZWM4	U6 snRNA-associated Sm-like protein LSm8	Lsm8	5	94291000	88668000	78581000	78912000	88024000	116100000	62643000	89803000	78944000	76891000	87110000	80095000	69208000	78708000	82654000	108200000
Q6ZWZ4	60S ribosomal protein L36	Rpl36	5	97828000	64556000	70933000	69437000	90981000	83194000	79030000	101030000	73571000	64217000	76318000	74002000	72346000	67984000	87842000	90020000
Q711T7	Glutamine-dependent NAD(+) synthetase	Nadsyn1	5	6384000	11908000	10425000	12443000	9537600	9662500	8944800	11562000	11323000	10233000	8687000	11238000	10550000	14036000	9231600	13972000
Q7TMM9	Tubulin beta-2A chain;Tubulin beta-2B chain	Tubb2a;Tubb2b	5	13320000	17066000	20448000	20808000	20399000	17172000	29141000	17418000	19787000	22635000	18674000	14871000	14976000	16359000	20520000	18466000
Q80UU9	Membrane-associated progesterone receptor component 2	Pgrmc2	5	42723000	79947000	57834000	62822000	38912000	43014000	47436000	43176000	53839000	62967000	52749000	47529000	47487000	47762000	43065000	41903000
Q80WW9	DDRGK domain-containing protein 1	Ddrgk1	5	23729000	27279000	28347000	26228000	28080000	24411000	27553000	25391000	23372000	26689000	31302000	30283000	24526000	26095000	25364000	30462000
Q80XR5	Splicing factor U2AF 65 kDa subunit	U2af2	5	18757000	24546000	19095000	27551000	21944000	20019000	16342000	19443000	15994000	18379000	13481000	22492000	22604000	17516000	22778000	21387000
Q8BGC4	Zinc-binding alcohol dehydrogenase domain-containing protein 2	Zadh2	5	111930000	72009000	97415000	90237000	131590000	143860000	168110000	98556000	115750000	90881000	122200000	105290000	118440000	125560000	149600000	114810000
Q8BGG9	Acyl-coenzyme A amino acid N-acyltransferase 2	Acnat2	5	24440000	23468000	31777000	38695000	36445000	28468000	40091000	46941000	31090000	31781000	36883000	37260000	28496000	34208000	34187000	22563000
Q8BH40	Syntaxin-7	Stx7	5	22511000	19623000	19620000	18998000	20330000	18152000	19167000	17416000	18669000	19110000	19003000	17879000	21126000	20452000	17805000	20230000
Q8BHA3-2	Probable D-tyrosyl-tRNA(Tyr) deacylase 2	Dtd2	5	50446000	50847000	40721000	50345000	36207000	47409000	39548000	51435000	42355000	40020000	50464000	46668000	41411000	43460000	44159000	60521000
Q8BIQ5	Cleavage stimulation factor subunit 2	Cstf2	5	8076100	6910500	6976800	6788300	6329400	6861300	6879500	7053100	6011000	5910400	6949100	7074500	5042900	7104500	6304600	11056000
Q8BK72	28S ribosomal protein S27, mitochondrial	Mrps27	5	19482000	14862000	16059000	13101000	12691000	13692000	14280000	16075000	14618000	17007000	12340000	16784000	17135000	13897000	18124000	22570000
Q8BLF1	Neutral cholesterol ester hydrolase 1	Nceh1	5	5887300	8546500	9246700	14081000	15381000	8804200	8633000	10791000	8833800	11971000	7312900	14554000	10323000	10698000	9813000	11053000
Q8BMF4	Dihydrolipoyllysine-residue acetyltransferase component of pyruvate dehydrogenase complex, mitochondrial	Dlat	5	27448000	32712000	31028000	30912000	28836000	14960000	49729000	18731000	23585000	42103000	18190000	30349000	31314000	25148000	25542000	19148000
Q8BMK4	Cytoskeleton-associated protein 4	Ckap4	5	11126000	9459400	8626800	9486900	8986200	11421000	8020800	8847500	6981000	9958700	9340000	8362100	7236400	8637500	7968800	15145000
Q8BU31	Ras-related protein Rap-2c	Rap2c	5	12744000	13651000	13421000	12468000	13683000	12612000	11926000	16911000	12187000	12664000	13538000	15353000	14578000	12416000	14385000	16218000
Q8BVU5	ADP-ribose pyrophosphatase, mitochondrial	Nudt9	5	17467000	18088000	14308000	12094000	12971000	17857000	12234000	12682000	13638000	12091000	14956000	12428000	15340000	13034000	12027000	14046000
Q8C7G5	Apolipoprotein A-V	Apoa5	5	11305000	15467000	15791000	10058000	13589000	13747000	11529000	12459000	14638000	13435000	12379000	17569000	14528000	13006000	14940000	14012000
Q8CI94	Glycogen phosphorylase, brain form	Pygb	5	893126	822315	13433000	29098000	788762	23641000	865364	809263	729584	22215000	845111	15265000	22647000	19114000	649718	14409000
Q8JZS0	Protein lin-7 homolog A	Lin7a	5	15011000	16104000	16969000	12427000	17281000	18779000	15836000	15195000	16951000	14205000	16787000	19272000	16211000	14742000	17001000	18093000
Q8JZZ0	UDP-glucuronosyltransferase 3A2	Ugt3a2	5	893126	5119000	6992100	9704800	10453000	4601100	47029000	809263	8450900	8267500	6848500	6881500	8769700	8115800	7796300	752936
Q8K0Z7	Translational activator of cytochrome c oxidase 1	Taco1	5	16806000	22855000	18643000	16044000	23686000	19465000	22351000	20757000	22315000	14750000	17191000	20779000	25659000	21891000	24323000	26071000
Q8K310	Matrin-3	Matr3	5	12035000	12966000	15678000	14822000	10207000	14349000	16017000	15748000	12420000	14581000	10766000	15597000	14772000	14583000	12756000	15027000
Q8K3J1	NADH dehydrogenase [ubiquinone] iron-sulfur protein 8, mitochondrial	Ndufs8	5	31679000	55303000	78100000	70258000	62175000	63081000	46639000	59633000	57270000	87449000	50301000	79624000	86858000	56532000	63851000	83504000
Q8R123-2	FAD synthase;Molybdenum cofactor biosynthesis protein-like region;FAD synthase region	Flad1	5	4001200	3735900	8845200	763642	5864600	6449300	5678200	809263	4962000	841786	2752200	5088200	4254200	5965300	5125900	752936
Q8R1Q9	Ribokinase	Rbks	5	20106000	17999000	23623000	18290000	16912000	22132000	15931000	22782000	20389000	16638000	23987000	19552000	16933000	19795000	19204000	24893000
Q8R1V4	Transmembrane emp24 domain-containing protein 4	Tmed4	5	40208000	54352000	52014000	48819000	58415000	59953000	44789000	50244000	45207000	50769000	63986000	52563000	53443000	44370000	52114000	41982000
Q8R5L1	Complement component 1 Q subcomponent-binding protein, mitochondrial	C1qbp	5	473320000	536290000	422350000	576890000	560980000	555120000	416030000	619790000	476560000	455840000	557760000	562440000	478550000	472930000	633750000	790950000
Q8VBV7	COP9 signalosome complex subunit 8	Cops8	5	17176000	17159000	20957000	12717000	14907000	15804000	18367000	15210000	13962000	18526000	17700000	18771000	14554000	13757000	12979000	20283000
Q8VCG4	Complement component C8 gamma chain	C8g	5	13359000	22264000	14383000	14086000	18663000	17266000	14019000	22538000	17847000	20226000	13333000	23600000	16332000	10434000	22400000	16197000
Q8VE37	Regulator of chromosome condensation	Rcc1	5	893126	822315	7111000	6868500	6884300	5771200	865364	6003200	7195000	7383300	8094100	766673	5401700	6447700	6957200	7790100
Q91VC3	Eukaryotic initiation factor 4A-III;Eukaryotic initiation factor 4A-III, N-terminally processed	Eif4a3;Gm8994	5	22128000	19184000	19673000	14340000	18726000	17954000	18562000	21789000	11468000	14276000	20793000	17150000	14455000	22874000	17802000	26010000
Q91VH6	Protein MEMO1	Memo1	5	11715000	11745000	6619800	5178000	8536000	6506400	8304900	8451200	11091000	6994000	8170900	9358300	780402	7803200	9950200	11913000
Q91VM5	RNA binding motif protein, X-linked-like-1	Rbmxl1	5	47553000	44533000	44022000	49012000	58812000	51501000	34675000	44773000	36785000	42518000	51348000	56542000	47481000	47158000	59979000	63354000
Q91XL1	Leucine-rich HEV glycoprotein	Lrg1	5	27402000	67268000	40292000	36087000	59428000	54496000	32983000	61366000	29093000	41364000	35449000	47226000	60671000	55295000	45044000	56053000
Q924T2	28S ribosomal protein S2, mitochondrial	Mrps2	5	17176000	18183000	13880000	13173000	15886000	14638000	16955000	16710000	16200000	17598000	16099000	15155000	14996000	17830000	13222000	23377000
Q99JZ4	GTP-binding protein SAR1a	Sar1a	5	51573000	54651000	58582000	53731000	54824000	52132000	53517000	52557000	53661000	48296000	66714000	65892000	59486000	46238000	56791000	64881000
Q99KG5-3	Lipolysis-stimulated lipoprotein receptor	Lsr	5	10295000	6313100	9760100	6631800	7977100	11519000	7962100	7785800	8152400	5565000	5922300	6427400	8793000	6371900	8339600	7584000
Q99KK7	Dipeptidyl peptidase 3	Dpp3	5	893126	8946300	8898300	8123700	11960000	4708100	11106000	8588900	5255800	12930000	9950900	7758200	8533300	10229000	8822200	9235000
Q99L20	Glutathione S-transferase theta-3	Gstt3	5	455190000	865630000	901160000	857650000	605580000	456260000	1318800000	656350000	845540000	956830000	500470000	717830000	756080000	791900000	688460000	392470000
Q99L45	Eukaryotic translation initiation factor 2 subunit 2	Eif2s2	5	15489000	24440000	25560000	25591000	30296000	22321000	26562000	30501000	23935000	28690000	26777000	24233000	35132000	23862000	28505000	26360000
Q99P27	Group XIIB secretory phospholipase A2-like protein	Pla2g12b	5	31013000	30421000	39397000	32140000	43784000	33544000	29022000	40356000	31761000	27124000	41864000	39445000	31776000	31613000	32924000	40324000
Q9CPP6	NADH dehydrogenase [ubiquinone] 1 alpha subcomplex subunit 5	Ndufa5	5	30710000	36386000	60731000	47617000	39323000	51044000	44483000	34693000	26939000	46807000	46082000	49898000	49921000	37596000	38950000	31022000
Q9CQ40	39S ribosomal protein L49, mitochondrial	Mrpl49	5	23914000	23294000	22237000	20726000	21569000	29804000	22484000	21968000	22701000	21513000	26761000	20821000	21893000	24711000	25074000	28050000
Q9CQ52	Chymotrypsin-like elastase family member 3B	Cela3b	5	52098000	822315	809843	14733000	788762	26721000	865364	9281400	729584	15527000	845111	766673	12308000	23911000	649718	752936
Q9CQB5	CDGSH iron-sulfur domain-containing protein 2	Cisd2	5	29561000	33167000	24352000	24781000	31931000	32849000	27849000	25026000	22378000	29919000	26111000	25296000	23443000	21246000	27144000	22075000
Q9CQD1	Ras-related protein Rab-5A	Rab5a	5	34711000	36657000	30368000	35177000	36877000	34923000	29068000	36289000	28006000	32561000	42242000	38644000	29205000	35878000	31898000	44510000
Q9CQJ8	NADH dehydrogenase [ubiquinone] 1 beta subcomplex subunit 9	Ndufb9	5	9897500	12175000	18062000	19256000	13063000	12112000	11706000	8571700	13085000	13894000	8911200	16700000	13451000	9343300	12081000	9947300
Q9CQM5	Thioredoxin domain-containing protein 17	Txndc17	5	92144000	85496000	92348000	85425000	76736000	96721000	83658000	79796000	91574000	83490000	88242000	96371000	78265000	80793000	76063000	66702000
Q9CQR2	40S ribosomal protein S21	Rps21	5	263820000	290100000	252870000	260800000	296630000	346500000	224740000	308030000	249010000	279240000	257530000	318000000	310740000	285630000	308570000	322350000
Q9CR09	Ubiquitin-fold modifier-conjugating enzyme 1	Ufc1	5	82800000	73823000	70488000	81295000	58838000	72306000	61878000	78855000	76186000	66573000	73801000	70016000	60976000	66128000	64840000	81175000
Q9CR57	60S ribosomal protein L14	Rpl14	5	147670000	144380000	149900000	101150000	155110000	107380000	151550000	123300000	124900000	122860000	119070000	148000000	134250000	100670000	172430000	147040000
Q9CR86	Calcium-regulated heat stable protein 1	Carhsp1	5	157310000	188580000	161770000	163140000	139560000	182070000	132930000	190690000	171050000	140930000	169400000	152250000	152610000	147970000	151740000	182320000
Q9CRD2	ER membrane protein complex subunit 2	Emc2	5	8992400	16985000	25633000	23061000	22315000	23766000	17417000	21701000	22134000	21599000	23975000	24847000	21262000	19472000	24553000	12688000
Q9CX00	IST1 homolog	Ist1	5	8829300	8930400	12099000	12514000	12818000	11414000	12340000	11023000	12091000	11894000	13468000	14603000	10324000	11242000	12393000	10638000
Q9CXA2	Trans-L-3-hydroxyproline dehydratase	L3hypdh	5	18632000	17841000	22561000	24505000	15355000	9354000	16540000	22160000	16630000	25917000	14011000	19123000	16644000	17807000	20680000	12710000
Q9CXE7	Transmembrane emp24 domain-containing protein 5	Tmed5	5	58740000	65093000	73386000	66208000	68950000	93425000	55527000	59959000	64386000	70918000	81974000	83993000	66748000	63424000	67235000	56263000
Q9CXR1	Dehydrogenase/reductase SDR family member 7	Dhrs7	5	11823000	13458000	15564000	12762000	6352300	6519600	12097000	809263	11207000	20295000	10554000	12601000	17797000	15091000	9440800	752936
Q9CY16	28S ribosomal protein S28, mitochondrial	Mrps28	5	14941000	15010000	16549000	20955000	13445000	19605000	16510000	15584000	19247000	17692000	19057000	16975000	14597000	21778000	14660000	23778000
Q9CY50	Translocon-associated protein subunit alpha	Ssr1	5	174790000	196010000	211890000	192570000	286260000	278360000	233840000	210950000	220840000	210750000	237080000	219630000	252980000	226380000	251690000	193880000
Q9D023	Mitochondrial pyruvate carrier 2	Mpc2	5	7982100	19120000	17452000	16434000	24226000	8515100	70759000	9760800	17129000	22168000	16676000	11483000	17402000	17057000	15888000	17949000
Q9D0G0	28S ribosomal protein S30, mitochondrial	Mrps30	5	13857000	13667000	11856000	10744000	10944000	17127000	11215000	11008000	12657000	8574500	14286000	12782000	13014000	10762000	10879000	17650000
Q9D0S9	Histidine triad nucleotide-binding protein 2, mitochondrial	Hint2	5	730690000	628480000	706600000	993490000	992320000	1033800000	746080000	1109900000	832790000	777810000	877160000	943450000	1045500000	924140000	993020000	1172500000
Q9D1B9	39S ribosomal protein L28, mitochondrial	Mrpl28	5	13817000	14297000	11366000	8475800	11393000	9522800	11974000	7133800	12328000	10711000	13444000	9926200	9780800	12833000	9938000	12336000
Q9D1L9	Ragulator complex protein LAMTOR5	Lamtor5	5	44493000	35968000	35125000	42358000	38066000	54839000	34378000	47726000	38801000	36411000	52222000	46780000	38667000	43122000	40758000	50864000
Q9D1P0	39S ribosomal protein L13, mitochondrial	Mrpl13	5	14186000	10140000	10079000	10238000	11707000	10061000	10488000	8258400	10698000	8522100	12404000	10843000	11058000	9117100	10956000	9538700
Q9D6S7	Ribosome-recycling factor, mitochondrial	Mrrf	5	32920000	30515000	27336000	20971000	32113000	31944000	25276000	32987000	26956000	25746000	31582000	31720000	25462000	27173000	29206000	47806000
Q9DAK9	14 kDa phosphohistidine phosphatase	Phpt1	5	49860000	43840000	37140000	33535000	38310000	46533000	33061000	37808000	42215000	34008000	45011000	36223000	35055000	39208000	41049000	42537000
Q9DBC7	cAMP-dependent protein kinase type I-alpha regulatory subunit;cAMP-dependent protein kinase type I-alpha regulatory subunit, N-terminally processed	Prkar1a	5	13289000	15040000	15432000	16226000	17593000	13104000	14833000	14306000	13205000	17581000	15718000	15920000	14619000	15068000	14974000	12918000
Q9DCC4	Pyrroline-5-carboxylate reductase 3	Pycrl	5	31573000	26725000	21193000	23039000	21027000	24714000	19569000	24037000	19840000	21544000	20919000	17120000	15074000	20243000	20758000	24183000
Q9DCC5	Chromobox protein homolog 3	Cbx3	5	73230000	76142000	66607000	71504000	57353000	77455000	57372000	63688000	60202000	74332000	72202000	71897000	82859000	74454000	55330000	78153000
Q9DCJ5	NADH dehydrogenase [ubiquinone] 1 alpha subcomplex subunit 8	Ndufa8	5	28299000	44346000	49582000	46766000	42597000	47504000	42490000	29576000	38893000	55092000	30234000	49101000	48066000	40703000	47588000	37344000
Q9DCV4	Regulator of microtubule dynamics protein 1	Rmdn1	5	42174000	36285000	36637000	44986000	36313000	24304000	36649000	36691000	41804000	45802000	23349000	39119000	41886000	33192000	43204000	27131000
Q9EP96	Solute carrier organic anion transporter family member 1A4	Slco1a4	5	33380000	26491000	39702000	36116000	44693000	62572000	42801000	44202000	31266000	34463000	43379000	40179000	43751000	31101000	38634000	62076000
Q9EPQ7	StAR-related lipid transfer protein 5	Stard5	5	88876000	99537000	102590000	95080000	95218000	94610000	74832000	120230000	107450000	101450000	105320000	113460000	111830000	89829000	105230000	113590000
Q9EQ80	NIF3-like protein 1	Nif3l1	5	48334000	44795000	39698000	37197000	43283000	43898000	39896000	44803000	39439000	36212000	43000000	43735000	35783000	46105000	40881000	53123000
Q9EQH3	Vacuolar protein sorting-associated protein 35	Vps35	5	7420300	8300100	4295100	3954900	4897100	6228900	7485100	4698200	5628100	5439100	5683700	3333800	5287300	4840900	4555400	5133700
Q9ERG0-2	LIM domain and actin-binding protein 1	Lima1	5	11076000	15417000	13656000	22107000	17460000	18139000	17625000	12650000	11290000	14011000	15185000	13237000	14714000	8069100	11241000	15013000
Q9EST5	Acidic leucine-rich nuclear phosphoprotein 32 family member B	Anp32b	5	27766000	30111000	46942000	35138000	31852000	35981000	31779000	40623000	37690000	39403000	33508000	42937000	45123000	39159000	54277000	53453000
Q9ET22	Dipeptidyl peptidase 2	Dpp7	5	8963000	14547000	13595000	15995000	29884000	15810000	17250000	18100000	21252000	16367000	17027000	15371000	28491000	23094000	28555000	16111000
Q9JM14	5(3)-deoxyribonucleotidase, cytosolic type	Nt5c	5	75140000	57468000	51692000	55144000	39819000	55359000	42923000	56426000	48189000	42959000	49779000	57338000	51114000	47503000	60890000	72426000
Q9JMG1	Endothelial differentiation-related factor 1	Edf1	5	31532000	28877000	24712000	23815000	29626000	30561000	26886000	29150000	25077000	26361000	33214000	28234000	26095000	24895000	22061000	30390000
Q9QUH0	Glutaredoxin-1	Glrx	5	106280000	126620000	138250000	157230000	179050000	128520000	144460000	183590000	156250000	148710000	183040000	168630000	166330000	186510000	189900000	131980000
Q9QYB1	Chloride intracellular channel protein 4	Clic4	5	13560000	12091000	16229000	11906000	13618000	11242000	15618000	12065000	13886000	14202000	15820000	15938000	14040000	14493000	15295000	10309000
Q9QZ85	Interferon-inducible GTPase 1	Iigp1	5	5760500	4948100	5655200	7331600	7503800	4616100	15638000	5356100	3817300	5609900	8909600	4538700	3684400	9865700	7761100	5777000
Q9QZD8	Mitochondrial dicarboxylate carrier	Slc25a10	5	893126	13395000	7438100	9982000	5840400	997042	32526000	2200900	7235300	7265400	9341500	6106700	5391000	6050100	6453200	6049600
Q9R0Q3	Transmembrane emp24 domain-containing protein 2	Tmed2	5	60061000	71742000	72467000	70660000	81793000	83008000	62826000	67183000	63397000	66415000	82800000	72224000	69187000	64209000	74639000	69594000
Q9R0Q7	Prostaglandin E synthase 3	Ptges3	5	142110000	110720000	169920000	144140000	125000000	132920000	153130000	138220000	144050000	154960000	127500000	154310000	113710000	122530000	116390000	133010000
Q9WU84	Copper chaperone for superoxide dismutase	Ccs	5	18756000	34367000	31848000	34196000	39104000	21363000	27323000	30478000	35378000	32926000	34378000	48772000	37344000	40258000	29319000	33159000
Q9Z1D1	Eukaryotic translation initiation factor 3 subunit G	Eif3g	5	12686000	15072000	23159000	10356000	16801000	18033000	18206000	11774000	17287000	17294000	17261000	17067000	10044000	12594000	11380000	15458000
Q9Z2D6	Methyl-CpG-binding protein 2	Mecp2	5	942890	697390	811770	884490	561320	734750	547160	390040	476150	763470	527890	1268600	760770	786810	652780	464150
Q9Z2N8	Actin-like protein 6A	Actl6a	5	16836000	20683000	20642000	21174000	16921000	19324000	14482000	22777000	17275000	19769000	16970000	18892000	21857000	19290000	18201000	17025000
Z4YKT6	Dehydrogenase/reductase SDR family member 7B	Dhrs7b	5	29819000	49558000	31841000	35554000	31457000	29120000	27311000	31738000	25317000	38064000	29462000	32593000	29324000	27552000	27168000	30617000
Z4YLI8	Clustered mitochondria protein homolog	Cluh	5	5621100	6929400	8735100	5955500	6427200	997042	9637600	5111700	5319600	10651000	3805700	8377000	8836600	6959800	6530900	752936
A0A0A6YXW6	Immunoglobulin alpha chain C region	Igha	4	70247000	35262000	71751000	47543000	57940000	72514000	33233000	60475000	51731000	39760000	25588000	55023000	64263000	46957000	47696000	87103000
A0A0B4J1J5	Immunoglobulin heavy variable V9-3	Ighv9-3;Ighv9-2	4	16110000	822315	5780400	1811000	788762	26175000	865364	809263	729584	6125300	845111	766673	780402	878568	110620000	752936
A0A0R4J0J0	Palmdelphin	Palmd	4	15802000	19547000	17852000	23202000	21549000	20037000	15777000	18269000	16184000	23568000	19497000	20460000	19243000	18092000	25732000	18041000
A0A0R4J0S2	Insulin-like growth factor-binding protein complex acid labile subunit	Igfals	4	8193400	7911000	5205500	9349700	10617000	10048000	6962600	7477100	8103100	7301100	7129500	8703400	7657800	8031100	7590700	14617000
A0A0R4J256	Proteasome subunit beta type-9	Psmb9	4	113440000	70611000	72307000	80273000	62299000	63194000	52715000	84826000	63689000	76434000	121290000	59792000	61386000	91832000	65669000	80438000
A0A1B0GSU0	Aldehyde dehydrogenase family 16 member A1	Aldh16a1	4	3851300	5425700	5894600	5485600	788762	3791900	15557000	4204500	4130500	7244100	4206900	6692400	4184800	3922600	6510300	8530100
A0A1L1SQA8	40S ribosomal protein S25	Rps25	4	388470000	361410000	350770000	370430000	340730000	468480000	307940000	369630000	337830000	406810000	351280000	354330000	395740000	360150000	417870000	343960000
A0A1W2P6P1	Small glutamine-rich tetratricopeptide repeat-containing protein alpha	Sgta	4	39408000	30995000	26849000	27592000	25505000	30127000	26668000	32353000	23277000	25495000	26894000	24116000	25219000	24500000	29006000	27565000
A0A1W2P845	Cysteine and glycine-rich protein 2	Csrp2	4	7086000	4519600	3994300	3757000	4126300	6105700	3934100	3916000	4535500	3300000	4218500	3830000	3477400	5607300	3890400	5974000
A0A1Y7VN70	Glutaredoxin-related protein 5, mitochondrial	Glrx5	4	131530000	209890000	136200000	207400000	160380000	134340000	128000000	180790000	189550000	180040000	161760000	188650000	152650000	156980000	218190000	170990000
A0A286YDH3	Cytidine monophosphate-N-acetylneuraminic acid hydroxylase	Cmah	4	9631000	14278000	12959000	10286000	17997000	12722000	12012000	17394000	11423000	10871000	19217000	13734000	15076000	14923000	15541000	15851000
A0A286YEB7	40S ribosomal protein S24	Rps24	4	192950000	132480000	131670000	142520000	172950000	162570000	174610000	180760000	151380000	135270000	155960000	157600000	168650000	154160000	223710000	226800000
A0A571BEG4	Protein 4.1	Epb4.1;Epb41	4	5837100	8070200	5748900	5951100	8005400	6824100	6484200	5641000	6169000	6465400	6458000	7595200	8098900	7095500	6644200	5590800
A0JNU3	60 kDa lysophospholipase;L-asparaginase;Platelet-activating factor acetylhydrolase	Aspg	4	15257000	14652000	15284000	16268000	13328000	12958000	15648000	16513000	19136000	17612000	7089300	14586000	14442000	13802000	15078000	13484000
A2A4P4	Alanyl-tRNA editing protein Aarsd1	Gm27029;Aarsd1	4	893126	11273000	15188000	12935000	11692000	8487000	13642000	14892000	13906000	18863000	12713000	13557000	12834000	14546000	17209000	8226000
A2AE27	AMP deaminase 2	Ampd2	4	75153000	59089000	60846000	77896000	72905000	82475000	59626000	65644000	83548000	82722000	64643000	68128000	48476000	70652000	62664000	65912000
A2AFJ1	Histone-binding protein RBBP7	Rbbp7	4	40759000	34523000	35752000	28366000	28994000	35361000	28297000	34396000	31857000	26568000	43004000	33734000	24460000	32159000	30553000	43421000
A2AFW6	Mitochondrial carrier homolog 2	Mtch2	4	9375800	9153800	14285000	9999500	10835000	6277500	18479000	8172200	9411900	12089000	7260200	11480000	14446000	878568	10679000	4889800
A2ARZ7	Ras-related protein Rab-22A	Rab22a	4	10939000	14451000	17000000	14101000	12177000	15934000	11491000	12169000	12372000	16122000	14685000	14046000	780402	878568	16179000	21147000
A6PWC3	Nardilysin	Nrd1	4	3297500	2599600	2916900	1928700	1508000	3246100	3207900	2040400	1730700	2240500	4219600	2176700	1804300	2845200	2489500	1389500
B1ARA3	60S ribosomal protein L26	Rpl26	4	136500000	82173000	92882000	78724000	102010000	93010000	107580000	104820000	99037000	77625000	101330000	77961000	81450000	102390000	107890000	105420000
B7ZBY7	Ubiquitin-conjugating enzyme E2 variant 2;Ubiquitin-conjugating enzyme E2 variant 1	Ube2v1;Gm20431;Ube2v2	4	134210000	97182000	71756000	84163000	90124000	104260000	85317000	75697000	86109000	80181000	89678000	74154000	77892000	97407000	80472000	80099000
D3YTP8	U6 snRNA-associated Sm-like protein LSm4	Lsm4	4	79965000	65823000	54789000	71577000	70740000	103550000	42322000	72607000	57137000	63335000	54598000	79288000	65634000	67130000	70532000	106890000
D3YV69	Ras-related protein Rab-6A;Ras-related protein Rab-6B	Rab6a;Rab6b	4	41352000	40047000	37792000	37656000	42740000	49066000	39477000	43310000	41161000	38603000	51708000	40778000	34355000	37332000	39898000	44939000
D3YVI6	COP9 signalosome complex subunit 7a	Cops7a	4	13099000	11716000	14444000	11852000	17016000	12845000	17920000	12986000	11254000	12473000	11859000	13993000	12907000	11998000	16177000	14204000
D3Z2Z1	CAP-Gly domain-containing linker protein 1	Clip1	4	893126	11612000	9426400	8227200	8743400	7239000	9667900	9377700	9329200	7333400	7016000	10562000	10536000	8489000	8336700	9353600
D3Z315	Coatomer subunit epsilon	Cope	4	15910000	15809000	25546000	17057000	19458000	15884000	21424000	20427000	19099000	25572000	16437000	24606000	15937000	19186000	17582000	13772000
D3Z3A0	Protein phosphatase inhibitor 2	Ppp1r2	4	16866000	15581000	15961000	11083000	16073000	22044000	11961000	13684000	13833000	11522000	15041000	19897000	17818000	12955000	16516000	16616000
D3Z3X1	3 beta-hydroxysteroid dehydrogenase type 7	Hsd3b7	4	18059000	25593000	31317000	21225000	32173000	9001100	33694000	30418000	16796000	20681000	28295000	32582000	33966000	34508000	39980000	19000000
D3Z4U8	DDB1- and CUL4-associated factor 11	Dcaf11	4	13759000	12059000	19155000	20223000	14675000	13927000	14882000	17739000	15307000	22640000	12170000	20871000	21656000	13125000	20937000	18962000
D3Z6I4	Quinone oxidoreductase-like protein 1	Cryzl1	4	14816000	13668000	10654000	7904400	11017000	8665200	10765000	8895900	10350000	8874300	9580900	9695700	9093600	11152000	9086300	10817000
D3Z7X0	Acyl-Coenzyme A dehydrogenase family, member 12	Acad12	4	23242000	16962000	14486000	20981000	19395000	22841000	18096000	19581000	20685000	18380000	17630000	17924000	21259000	18488000	14340000	16742000
D5MCW4	Protein CutA	Cuta	4	76246000	86555000	81353000	96314000	80274000	83199000	64671000	94016000	90906000	77672000	85971000	94155000	89569000	77181000	87132000	85556000
E0CX98	Bax inhibitor 1	Tmbim6	4	39005000	45781000	31971000	33808000	36412000	31829000	37159000	28656000	33309000	32866000	33559000	37413000	35311000	29470000	25068000	23057000
E9PV14	Band 4.1-like protein 1	Epb4.1l1;Epb41l1	4	33571000	55885000	39617000	34569000	41059000	29337000	32156000	42499000	38032000	36627000	34176000	34922000	32466000	46846000	50190000	28872000
E9Q1S3	Protein transport protein Sec23A	Sec23a	4	11204000	15141000	15309000	14074000	14535000	10573000	24988000	11202000	10976000	17243000	11752000	14188000	13015000	11541000	14007000	11095000
E9Q2T3	Tenascin XB	Tnxb	4	893126	4511700	809843	763642	788762	4535000	4632200	809263	729584	841786	845111	4024200	780402	878568	649718	5464400
E9Q4K7	Kinesin-like protein	Kif13b	4	4896000	13490000	6434200	6851800	9344900	4891800	7964200	4552200	4975600	5321700	11474000	8037100	6270600	5933000	7509800	6419100
E9Q4M8	Delta(14)-sterol reductase	Tm7sf2	4	893126	7867700	9605300	16714000	8662600	6350600	5757500	10214000	11124000	14491000	15532000	18954000	8475100	6567000	9092500	5364800
E9Q5D9	Insulin-like growth factor-binding protein 7	Igfbp7	4	9208100	7406300	7621100	8142200	9524400	9348800	5746800	6630300	9372200	5895000	9434800	9374800	9018800	6968600	7072900	8717900
E9Q6M5	Solute carrier family 22 (organic cation transporter), member 26	Slc22a26	4	893126	822315	809843	5450100	788762	997042	12674000	809263	729584	841786	5220200	766673	780402	878568	649718	752936
E9Q6R3	Vesicle-trafficking protein SEC22b	Sec22b	4	5466800	9660100	9716100	12064000	10375000	11721000	13153000	10522000	9145700	9886900	7258000	766673	780402	7127100	12660000	8956800
E9QJW0	Microsomal glutathione S-transferase 1	Mgst1	4	383590000	1203300000	1944900000	1729400000	1180500000	685830000	1468200000	1303800000	1503000000	1426200000	1025300000	1746300000	1240100000	767080000	1387400000	641190000
E9QP46	Nesprin-2	Syne2	4	60903000	41413000	47248000	52376000	46697000	53867000	41288000	46856000	59669000	40830000	56088000	43671000	65591000	40339000	51700000	57743000
F6UV57	Sarcolemmal membrane-associated protein	Slmap	4	12181000	12951000	12590000	11584000	16889000	18410000	10952000	10057000	10209000	14824000	11863000	14656000	10058000	10137000	14565000	11117000
F6ZFT1	Acyl carrier protein;Acyl carrier protein, mitochondrial	Ndufab1	4	299250000	288450000	293370000	334470000	281170000	385830000	247690000	354970000	330430000	313610000	302200000	348810000	360460000	294910000	390730000	401710000
F8WI14	Extracellular matrix protein 1	Ecm1	4	6992700	7711100	6859400	7761200	10849000	7373100	7458700	7418700	6492100	6498600	7053600	8634000	8190900	6219600	7491100	6957200
F8WI31	Pleiotropic regulator 1	Plrg1	4	4278300	5839700	809843	4565500	5231300	4961100	4798200	4340700	2923200	4427500	4285500	3711200	4535100	4305500	3719500	4475900
F8WJG3	Transformer-2 protein homolog beta	Tra2b	4	90543000	99452000	86545000	79848000	90211000	108630000	82453000	90991000	75882000	84244000	102510000	91672000	93725000	97936000	94965000	105750000
G3UWD3	3-hydroxybutyrate dehydrogenase type 2	Bdh2	4	40449000	32651000	23467000	37339000	12643000	34008000	13322000	19828000	32757000	24248000	29852000	22777000	16134000	18148000	10123000	19966000
G3UYJ7	Predicted gene 20441	Gm20441	4	37712000	63559000	69011000	72730000	55525000	33961000	113020000	47109000	75519000	90841000	54377000	43861000	58183000	61359000	46673000	24396000
G3X9X5	Zinc finger CCCH-type antiviral protein 1	Zc3hav1	4	5524800	7072200	6115000	5099900	6524400	6044100	5297400	4862500	6238000	5128800	4071400	5927600	780402	4678200	6325300	5992500
H3BJA3	Glutamate--cysteine ligase regulatory subunit	Gclm	4	52148000	47200000	38940000	46165000	48896000	52994000	61007000	52424000	44630000	38915000	45555000	48779000	50975000	49699000	56242000	94466000
K7N6C2	Cytochrome P450, family 2, subfamily c, polypeptide 68	Cyp2c68	4	21689000	18641000	18178000	17390000	21431000	13220000	25300000	16173000	17951000	26899000	14421000	21410000	18437000	22078000	26328000	22618000
O35344	Importin subunit alpha-4	Kpna3	4	6254800	8592400	10274000	9860800	8828500	7634100	9875700	4501700	11381000	6958300	5944600	10058000	9352400	10869000	11064000	7551000
O35593	26S proteasome non-ATPase regulatory subunit 14	Psmd14	4	12917000	18991000	24720000	20486000	21959000	12325000	25928000	21980000	20163000	25688000	15203000	24207000	17247000	18856000	20664000	18624000
O55111	Desmoglein-2	Dsg2	4	3239500	2817700	5774800	5314700	4335200	4749400	3053100	3356200	4469300	4456200	3258800	4109100	4375300	3775200	4337300	3014400
O55242	Sigma non-opioid intracellular receptor 1	Sigmar1	4	38329000	40986000	32785000	26319000	36362000	35249000	37518000	27922000	39036000	39939000	43255000	30457000	41712000	42213000	33354000	27239000
O88441	Metaxin-2	Mtx2	4	7244700	15046000	17887000	17771000	12554000	11171000	15434000	7501500	11920000	16236000	8351300	16696000	17427000	14674000	17223000	9825800
O89017	Legumain	Lgmn	4	68146000	59344000	83311000	65640000	91236000	76219000	83085000	58716000	73733000	63802000	83227000	89722000	75340000	86195000	88117000	74857000
P00405	Cytochrome c oxidase subunit 2	Mtco2	4	13056000	39383000	51908000	74747000	54344000	37406000	84299000	30349000	39343000	64726000	27057000	46969000	43444000	28800000	59318000	30793000
P01837	Immunoglobulin kappa chain C region	Igkc	4	378820000	343370000	287490000	423810000	151300000	324140000	126820000	133400000	161900000	222370000	288770000	308770000	71434000	128450000	132460000	120930000
P03953-2	Complement factor D	Cfd	4	22117000	11448000	15226000	15038000	24369000	57127000	21107000	22594000	18894000	17096000	27923000	27475000	23845000	22267000	34824000	53790000
P08071	Lactotransferrin	Ltf	4	7504400	6966800	6381600	4053500	5179900	7291300	865364	809263	8994300	3067400	4461800	6926200	6429100	4653600	4958600	5807100
P10833	Ras-related protein R-Ras	Rras	4	28622000	24105000	27136000	29757000	25904000	30363000	22975000	28566000	20860000	26555000	26897000	26147000	21938000	20886000	20176000	27771000
P11031	Activated RNA polymerase II transcriptional coactivator p15	Sub1	4	79334000	46744000	64133000	56351000	50684000	90729000	60429000	58326000	61504000	52638000	75754000	55960000	53485000	70717000	56648000	60718000
P14094	Sodium/potassium-transporting ATPase subunit beta-1	Atp1b1	4	33652000	26539000	39687000	47403000	34283000	61386000	59427000	43292000	37833000	42472000	45673000	43675000	40743000	45440000	33356000	38584000
P19253	60S ribosomal protein L13a	Rpl13a	4	107260000	90966000	90125000	75813000	103610000	86913000	110640000	85006000	82881000	78989000	76266000	93621000	89824000	76288000	114860000	104090000
P24668	Cation-dependent mannose-6-phosphate receptor	M6pr	4	74343000	74825000	64316000	68137000	66550000	78527000	56962000	73143000	64872000	67515000	79483000	68807000	63184000	63569000	67313000	70405000
P26645	Myristoylated alanine-rich C-kinase substrate	Marcks	4	25770000	16243000	16191000	13127000	15138000	20629000	11964000	11998000	13260000	13729000	21518000	13614000	12331000	15750000	15192000	22199000
P39039	Mannose-binding protein A	Mbl1	4	42803000	44510000	35814000	37323000	44441000	38226000	28773000	33942000	35266000	34084000	34667000	42865000	30053000	30086000	39940000	34722000
P41105	60S ribosomal protein L28	Rpl28	4	158850000	101320000	99095000	91397000	122840000	104100000	132880000	96422000	106970000	84431000	94834000	94550000	107220000	106210000	150170000	131150000
P45377	Aldose reductase-related protein 2	Akr1b8	4	115390000	126820000	165100000	142670000	131280000	112970000	129020000	101740000	127680000	129970000	132270000	152410000	118210000	192710000	143180000	129100000
P45591	Cofilin-2	Cfl2	4	27424000	28971000	30060000	22764000	38855000	28209000	30030000	37269000	32230000	35059000	37757000	39931000	37803000	27249000	39709000	49440000
P46412	Glutathione peroxidase 3	Gpx3	4	66114000	40647000	42252000	54405000	62837000	109870000	36961000	71175000	37147000	38948000	48633000	52521000	41462000	47341000	58671000	85875000
P46656	Adrenodoxin, mitochondrial	Fdx1	4	85050000	152640000	87289000	69274000	174010000	107960000	83324000	114910000	105400000	72636000	121630000	144360000	106530000	119180000	140410000	214970000
P47955	60S acidic ribosomal protein P1	Rplp1	4	631090000	854030000	790650000	856560000	1132600000	970760000	836850000	1073900000	754830000	778630000	674830000	1129700000	837120000	757760000	1061700000	1265600000
P47968	Ribose-5-phosphate isomerase	Rpia	4	8266400	9005400	7233400	6359900	6068600	6964200	6150200	5783100	7612600	8192500	8941700	5585500	7668700	8269400	4336500	7283300
P49935	Pro-cathepsin H;Cathepsin H mini chain;Cathepsin H;Cathepsin H heavy chain;Cathepsin H light chain	Ctsh	4	265600000	309560000	329570000	322010000	416660000	377710000	294330000	387090000	331940000	249740000	419310000	421800000	433180000	381810000	431090000	442200000
P50295	Arylamine N-acetyltransferase 2	Nat2	4	893126	12409000	16129000	13548000	9687700	997042	23100000	11931000	13856000	841786	845111	9130300	12896000	10080000	23365000	12550000
P50518	V-type proton ATPase subunit E 1;V-type proton ATPase subunit E 2	Atp6v1e1;Atp6v1e2	4	27950000	25890000	22150000	33952000	31075000	36139000	23326000	27165000	20132000	26675000	32590000	30040000	32448000	25073000	25624000	33665000
P53996-2	Cellular nucleic acid-binding protein	Cnbp	4	93573000	90620000	91632000	77696000	93696000	114170000	93294000	87340000	77040000	84130000	98408000	102730000	88818000	95247000	87816000	102920000
P54823	Probable ATP-dependent RNA helicase DDX6	Ddx6	4	17142000	15837000	15667000	8817300	13448000	15149000	12792000	8002600	11355000	13604000	15370000	13702000	17135000	15732000	14190000	16196000
P55258	Ras-related protein Rab-8A	Rab8a	4	13787000	14786000	16933000	14777000	19481000	16648000	19091000	14919000	17160000	17740000	18705000	14703000	14553000	15803000	17021000	19455000
P56654	Cytochrome P450 2C37	Cyp2c37	4	893126	26279000	36041000	38233000	60734000	997042	76946000	11821000	23160000	32174000	25263000	36378000	22187000	36819000	35266000	752936
P59017	Bcl-2-like protein 13	Bcl2l13	4	8638200	12142000	17755000	15707000	12992000	11849000	13454000	15014000	11317000	12951000	13363000	13655000	18290000	9753200	17547000	13620000
P60670-2	Nuclear protein localization protein 4 homolog	Nploc4	4	7412800	12110000	10307000	6715400	10588000	10246000	8432900	8656400	12662000	5616500	9252300	14734000	8902200	10281000	15548000	12539000
P60843	Eukaryotic initiation factor 4A-I	Eif4a1	4	17968000	26113000	38019000	27897000	32407000	23376000	58214000	23871000	30438000	37113000	25783000	32065000	30527000	34821000	31720000	26220000
P60867	40S ribosomal protein S20	Rps20	4	404340000	341490000	347410000	339500000	381980000	416880000	331690000	365070000	361240000	370110000	346060000	357140000	389340000	377610000	421890000	397170000
P61148	Fibroblast growth factor 1	Fgf1	4	7216600	8906100	7386800	8826900	11191000	10367000	9443400	10135000	10190000	9416800	9627500	8566700	8710300	10155000	9212200	7454900
P61290	Proteasome activator complex subunit 3	Psme3	4	5603500	9225600	7929700	10011000	7542900	7179200	8737500	8556700	5797300	9052400	6796700	8271100	7698500	5865900	7981600	10380000
P62196	26S protease regulatory subunit 8	Psmc5	4	13677000	14959000	13990000	12794000	16226000	9602300	21269000	11753000	12384000	14743000	11164000	12421000	13938000	16994000	15242000	13724000
P62305	Small nuclear ribonucleoprotein E	Snrpe	4	190970000	192950000	176430000	188300000	205470000	197830000	146500000	181590000	160770000	159300000	189080000	198800000	176860000	179390000	157990000	263130000
P62320	Small nuclear ribonucleoprotein Sm D3	Snrpd3	4	135460000	131610000	100280000	98506000	139810000	140020000	110340000	102300000	105890000	97566000	125810000	120590000	133890000	102040000	110190000	152480000
P62331	ADP-ribosylation factor 6	Arf6	4	28893000	27833000	28297000	30132000	43147000	35188000	33720000	36834000	33587000	42922000	32438000	33048000	39480000	36696000	44215000	45422000
P63028	Translationally-controlled tumor protein	Tpt1	4	119050000	154410000	202030000	203150000	205400000	154930000	168360000	207070000	187030000	184710000	135610000	210650000	159840000	168030000	227620000	168560000
P63030	Mitochondrial pyruvate carrier 1	Mpc1	4	6311000	8824100	9127400	7933500	9890000	3978800	18664000	7419400	6923400	7382200	7137300	9044100	3975000	9837200	7118800	8233000
P84096	Rho-related GTP-binding protein RhoG	Rhog	4	18884000	18173000	17699000	18385000	16845000	12313000	12695000	17164000	14559000	16542000	19566000	15575000	15054000	13866000	14397000	17017000
P97290	Plasma protease C1 inhibitor	Serping1	4	11635000	12015000	12463000	13707000	12540000	18187000	10079000	10318000	12988000	12073000	12923000	15213000	13262000	13969000	12632000	16198000
P97315	Cysteine and glycine-rich protein 1	Csrp1	4	47016000	21948000	30703000	27177000	26575000	60772000	21509000	32782000	21870000	21738000	29512000	25126000	26207000	33358000	21210000	32480000
Q14DH7	Acyl-CoA synthetase short-chain family member 3, mitochondrial	Acss3	4	14730000	19120000	16626000	17035000	16185000	997042	25462000	9779900	21147000	29198000	16848000	16440000	18576000	11725000	21397000	20582000
Q2TPA8	Hydroxysteroid dehydrogenase-like protein 2	Hsdl2	4	17712000	17697000	19432000	16738000	23815000	20106000	29953000	17307000	18092000	17584000	16928000	19294000	19109000	22170000	20869000	18821000
Q3THW5	Histone H2A.V;Histone H2A.Z;Histone H2A	H2afv;H2afz	4	1032500000	894980000	938060000	898140000	787210000	1130200000	888260000	767470000	817380000	1169300000	864350000	874680000	1227800000	1010200000	817500000	717840000
Q3TYT1	5-demethoxyubiquinone hydroxylase, mitochondrial	Coq7	4	17065000	12787000	13854000	16008000	14340000	21138000	17827000	14160000	16444000	12545000	15359000	15874000	19263000	18555000	16612000	24969000
Q3U7R1	Extended synaptotagmin-1	Esyt1	4	893126	5913500	7759500	4313300	6539300	5314600	6699000	5338000	4588100	5387000	5003000	5755200	6069600	4512300	5258900	6174900
Q5F285	Transmembrane protein 256	Tmem256	4	47837000	71234000	103540000	152040000	120310000	113270000	71874000	100360000	69097000	96638000	67373000	128190000	104950000	57188000	116870000	83472000
Q5ND29	Rab-interacting lysosomal protein	Rilp	4	14059000	16232000	17120000	17282000	16140000	17534000	16187000	16523000	14484000	14927000	18750000	19648000	16776000	15362000	19460000	19051000
Q5SUT0	RNA-binding protein EWS	Ewsr1	4	34358000	21695000	26049000	22585000	20628000	33457000	22204000	26288000	22730000	20423000	26216000	21219000	22978000	24383000	19935000	22545000
Q5SVG5	AP-1 complex subunit beta-1	Ap1b1	4	8899300	8094800	6766900	8866300	6560900	4389200	14718000	5117300	6352700	8407200	4794600	7030500	6288200	6466400	8937900	7082000
Q60590	Alpha-1-acid glycoprotein 1	Orm1	4	81939000	107740000	75876000	96159000	85025000	55206000	63457000	92229000	73055000	81534000	96594000	71879000	66999000	70437000	77091000	62214000
Q60931	Voltage-dependent anion-selective channel protein 3	Vdac3	4	17976000	25007000	32563000	48038000	24410000	27900000	31656000	34364000	24488000	33506000	15595000	38101000	27420000	11193000	36883000	24279000
Q61129	Complement factor I;Complement factor I heavy chain;Complement factor I light chain	Cfi	4	35573000	23133000	19387000	21636000	23217000	28727000	23252000	23277000	19004000	19504000	19953000	24484000	19359000	19987000	17854000	19897000
Q61206	Platelet-activating factor acetylhydrolase IB subunit beta	Pafah1b2	4	84362000	85648000	79578000	88261000	88485000	94493000	72001000	105380000	84507000	79966000	82682000	80979000	79708000	85455000	88352000	113610000
Q61559	IgG receptor FcRn large subunit p51	Fcgrt	4	16465000	20900000	16607000	18350000	19018000	18092000	14968000	16663000	18127000	17296000	23944000	18951000	18961000	19733000	16566000	14011000
Q61823	Programmed cell death protein 4	Pdcd4	4	14381000	13389000	13851000	9468000	17326000	15735000	12527000	17986000	12717000	18220000	14377000	18448000	14688000	15462000	18616000	16726000
Q61830	Macrophage mannose receptor 1	Mrc1	4	222220000	241810000	271690000	228550000	283340000	184880000	281790000	809263	207750000	343620000	217920000	180620000	237080000	163030000	171010000	192300000
Q62048	Astrocytic phosphoprotein PEA-15	Pea15;Pea15a	4	9169400	9272400	8402600	8248100	11666000	13329000	8726600	13240000	8080100	8475700	8577700	9304600	9753100	9015800	11758000	16080000
Q62384	Zinc finger protein ZPR1	Zpr1	4	13582000	9878900	11179000	13642000	9116000	14284000	11111000	15264000	11347000	11333000	11782000	10088000	9279300	10420000	12630000	16478000
Q64464	Cytochrome P450 3A13	Cyp3a13	4	2256000	3585600	5290100	6053800	7531000	997042	26041000	5085600	5096000	7093000	3458100	3472200	6500500	4632100	6731500	3557800
Q78PG9	Coiled-coil domain-containing protein 25	Ccdc25	4	22182000	20862000	20108000	20588000	22177000	22395000	18107000	23105000	22902000	17823000	23198000	16518000	16462000	19891000	23638000	19531000
Q791T5-2	Mitochondrial carrier homolog 1	Mtch1	4	14251000	11927000	10676000	17632000	9045900	8718800	10456000	8983900	10699000	8107900	9527600	9542400	8295500	7382100	7734700	9836500
Q8BFQ8	Parkinson disease 7 domain-containing protein 1	Pddc1	4	33721000	28966000	30213000	28898000	26811000	28671000	26548000	33350000	27032000	27771000	30045000	30339000	30116000	24435000	30522000	37045000
Q8BG73	SH3 domain-binding glutamic acid-rich-like protein 2;SH3 domain-binding glutamic acid-rich-like protein	Sh3bgrl2	4	20560000	31231000	27512000	24719000	22868000	22424000	23487000	31630000	25424000	29453000	22594000	28058000	21943000	21818000	29431000	19914000
Q8BGH2	Sorting and assembly machinery component 50 homolog	Samm50	4	893126	7890000	8799300	11598000	10174000	9338500	15993000	809263	729584	8573600	845111	7532700	10985000	878568	6771000	5771500
Q8BGW1-2	Alpha-ketoglutarate-dependent dioxygenase FTO	Fto	4	8199700	8449300	6918200	6357100	8595600	8811000	5062600	10090000	6058100	7786400	7648900	8125400	7986000	7827800	6238800	10519000
Q8BK67	Protein RCC2	Rcc2	4	12149000	6939100	6838300	6310200	6609000	8071200	7359200	5595800	5463900	5893300	7362200	6700600	7153400	7867700	6744800	6216000
Q8BMJ3	Eukaryotic translation initiation factor 1A, X-chromosomal	Eif1ax;Gm5039	4	33123000	29764000	25833000	21196000	26524000	36630000	26227000	25535000	36929000	20907000	33027000	28601000	23806000	33100000	30132000	31893000
Q8BP67	60S ribosomal protein L24	Rpl24	4	152850000	86430000	86026000	84842000	98369000	98004000	146680000	125040000	95053000	91198000	85047000	87005000	93177000	90748000	123340000	123040000
Q8BZA9	Fructose-2,6-bisphosphatase TIGAR	Tigar	4	8654700	13117000	7725200	9618300	11124000	12098000	9796200	16121000	9324200	8907200	10566000	12572000	8962500	8126600	14124000	9949100
Q8BZB2	Phosphopantothenoylcysteine decarboxylase	Ppcdc	4	8403900	7500700	6506300	4186400	6420200	6225500	6072300	4422800	6936100	841786	5160400	7471500	6929200	5909000	6065800	6469600
Q8C5W3	Tubulin-specific chaperone cofactor E-like protein	Tbcel	4	4642600	8720000	14827000	13971000	7640500	5612400	19167000	11850000	16133000	15929000	4770300	15322000	12563000	11904000	13618000	5952100
Q8CBB6	Histone H2B;Histone H2B type 1-P;Histone H2B type 1-K;Histone H2B type 1-C/E/G;Histone H2B type 2-B;Histone H2B type 1-H;Histone H2B type 1-B;Histone H2B type 1-M;Histone H2B type 1-F/J/L;Histone H2B type 3-A;Histone H2B type 3-B;Histone H2B type 2-E	Hist1h2br;Hist1h2bp;Hist1h2bk;Hist1h2bc;Hist2h2bb;Hist1h2bh;Hist1h2bb;Hist1h2bm;Hist1h2bf;Hist3h2ba;Hist3h2bb;Hist2h2be	4	1255000000	1390400000	900120000	1639600000	817300000	1372300000	814850000	1154400000	882340000	2011400000	948130000	1545800000	2383900000	1636200000	1014900000	986400000
Q8CBM2	Aspartyl/asparaginyl beta-hydroxylase	Asph	4	15325000	10091000	12076000	7981200	10110000	997042	7608000	9355700	729584	9110300	845111	13096000	780402	7764100	13268000	9712800
Q8JZU2	Tricarboxylate transport protein, mitochondrial	Slc25a1	4	18303000	18763000	15201000	32356000	17097000	12580000	42867000	17425000	24104000	25854000	19066000	13687000	18480000	23505000	17321000	21826000
Q8K0M3	Vinexin	Sorbs3	4	12179000	8022600	12078000	9164600	9358600	10352000	11220000	10979000	9755400	7875300	9729900	11265000	12646000	10114000	649718	15594000
Q8K215	LYR motif-containing protein 4	Lyrm4	4	25586000	28178000	23379000	21611000	27048000	33398000	25093000	25949000	27194000	24566000	28360000	24196000	26377000	24394000	29587000	29955000
Q8K2C7-2	Protein OS-9	Os9	4	3671400	5347700	5323300	3130400	6094200	4106200	3983000	3013900	3561600	2338800	5521900	5409400	3275200	2911500	2917700	5013400
Q8K3M1	Cis-retinol/3alpha hydroxysterol short-chain dehydrogenase-like protein	BC089597	4	25610000	25929000	27301000	33628000	29546000	19708000	38488000	23000000	25135000	37844000	25399000	30823000	28473000	26506000	24413000	21832000
Q8K5B2	Multiple coagulation factor deficiency protein 2 homolog	Mcfd2	4	83873000	101640000	129080000	193130000	141590000	127080000	102650000	126680000	106410000	107370000	133010000	118590000	90116000	102320000	128590000	116880000
Q8QZY9	Splicing factor 3B subunit 4	Sf3b4	4	14198000	14232000	17943000	16459000	17958000	16255000	13686000	15936000	14286000	12905000	18178000	17666000	13712000	16546000	17082000	19492000
Q8R0F3	Sulfatase-modifying factor 1	Sumf1	4	4749400	8473300	5877800	5833100	6958300	8588900	5340900	7292200	5976100	841786	7222900	6831100	5474200	6538600	8305200	8348500
Q8R1S0	Ubiquinone biosynthesis monooxygenase COQ6, mitochondrial	Coq6	4	6323400	7680500	7086800	6842900	8162400	8087000	12299000	8495600	9638300	9515900	7372000	9528500	11839000	10416000	13060000	7049900
Q8R242	Di-N-acetylchitobiase	Ctbs	4	11850000	11951000	11054000	10139000	14586000	13017000	7136100	10285000	9630500	9908000	13717000	11573000	11437000	10915000	10684000	10700000
Q8R2Y8	Peptidyl-tRNA hydrolase 2, mitochondrial	Ptrh2	4	44835000	59628000	49880000	41128000	50555000	38359000	48486000	40474000	50688000	52175000	43692000	49466000	51755000	46427000	53628000	49296000
Q8VBV3	Exosome complex component RRP4	Exosc2	4	12155000	11847000	9357100	14562000	12364000	13492000	10385000	12830000	11274000	11483000	10543000	8242700	15486000	11046000	12162000	14255000
Q8VCA4	Leukotriene-B4 omega-hydroxylase 3;Leukotriene-B(4) omega-hydroxylase 2	Cyp4f15;Cyp4f14;Cyp4f3;Cyp4f40	4	6328900	6905500	10233000	9120700	10000000	8589800	22979000	7016100	9397900	8519300	8734800	10395000	9976500	10218000	14741000	9535300
Q8VCC1	15-hydroxyprostaglandin dehydrogenase [NAD(+)]	Hpgd	4	893126	8008800	12321000	13315000	17134000	997042	18582000	13080000	13768000	14240000	9387100	11232000	11884000	8102900	16425000	6651700
Q8VCU2	Phosphatidylinositol-glycan-specific phospholipase D	Gpld1	4	893126	6331500	8935600	9161400	8583000	9564300	7693600	7215300	729584	9223000	7309600	6936200	8664000	6395200	7506800	7240300
Q8VED9	Galectin-related protein	Lgalsl	4	19046000	19119000	17359000	15894000	14094000	22462000	16264000	16234000	18552000	13280000	17264000	14538000	17201000	17383000	18235000	17132000
Q8VEE0	Ribulose-phosphate 3-epimerase	Rpe	4	32772000	27424000	32303000	39567000	33218000	31527000	29263000	43094000	37628000	40363000	32542000	31485000	39286000	34801000	38612000	41864000
Q91YR1	Twinfilin-1	Twf1	4	12135000	10554000	12734000	12015000	11487000	8967300	15448000	10075000	14980000	13688000	11367000	13395000	15087000	12399000	16148000	11540000
Q921H9	Cytochrome c oxidase assembly factor 7	Coa7	4	53753000	47982000	50310000	48316000	34926000	69582000	48195000	60691000	50170000	48020000	52453000	55491000	46875000	53801000	48872000	78688000
Q921T2-3	Torsin-1A-interacting protein 1	Tor1aip1	4	5080600	6903100	5637200	6565100	6162400	8020800	6544800	7375700	5314700	9238700	6711600	9064300	5923900	7264900	6884400	10583000
Q922H4	Mannose-1-phosphate guanyltransferase alpha	Gmppa	4	8416900	7443500	9341900	8509600	8833000	6103100	8035900	8829800	9988100	8899400	7761300	8640700	8925900	7591800	11558000	9553600
Q924M7	Mannose-6-phosphate isomerase	Mpi	4	7599900	9649900	8167200	8439000	8942400	997042	865364	6256700	8331400	7948000	6264800	12493000	8112600	7786400	11162000	7777700
Q99JB8	Protein kinase C and casein kinase II substrate protein 3	Pacsin3	4	20366000	22909000	25730000	23686000	21132000	29768000	21487000	24299000	23928000	20701000	24616000	29334000	19658000	23965000	28934000	28861000
Q99JF5	Diphosphomevalonate decarboxylase	Mvd	4	37488000	42788000	33460000	56553000	28872000	28411000	30266000	43088000	47665000	49417000	36368000	46025000	39470000	39793000	41174000	52215000
Q99JR1	Sideroflexin-1	Sfxn1	4	893126	2268100	3322500	4903600	5569900	3544600	19344000	2644600	4487500	5211300	845111	766673	2439500	1925400	4818700	3201000
Q99KP6	Pre-mRNA-processing factor 19	Prpf19	4	11691000	11646000	16931000	11137000	17930000	13139000	14166000	15674000	14700000	17199000	8499700	14259000	12706000	17002000	13522000	16174000
Q99KV1	DnaJ homolog subfamily B member 11	Dnajb11	4	43130000	37377000	48546000	38770000	67139000	54821000	45352000	39769000	34384000	37871000	52594000	52691000	36154000	34195000	60084000	59664000
Q99L27	GMP reductase 2	Gmpr2	4	18592000	16009000	14960000	12544000	14813000	15669000	11222000	13449000	13613000	11315000	16570000	12468000	18612000	15864000	13753000	16731000
Q99L88	Beta-1-syntrophin	Sntb1	4	6337200	7519900	6611500	9821500	8792300	6656600	7140000	809263	729584	841786	6478200	6548500	6612000	878568	649718	752936
Q99LD8	N(G),N(G)-dimethylarginine dimethylaminohydrolase 2	Ddah2	4	10226000	6826300	12292000	8391500	12289000	13040000	8160900	11807000	8074900	7961800	9458000	12520000	12256000	8649200	10295000	12543000
Q99N96	39S ribosomal protein L1, mitochondrial	Mrpl1	4	10099000	12872000	9294700	10861000	10648000	9805300	9024100	10851000	10558000	10430000	11489000	10944000	11303000	12522000	12191000	12396000
Q99PG2	Opioid growth factor receptor	Ogfr	4	4982900	6370400	5288800	5004400	4187600	5389100	4731800	5165200	6197700	6714900	4298700	4786200	5061300	6359900	3169900	752936
Q9CPT3	N-acylneuraminate-9-phosphatase	Nanp	4	11539000	15658000	14620000	13172000	10542000	18522000	12460000	10570000	15476000	11425000	12120000	15223000	15371000	12697000	13849000	19759000
Q9CPT5	Nucleolar protein 16	Nop16	4	31966000	35142000	37894000	23652000	35970000	34802000	37644000	37899000	40242000	25187000	42725000	35978000	31539000	40277000	34293000	36111000
Q9CPX6	Ubiquitin-like-conjugating enzyme ATG3	Atg3	4	24580000	26845000	37186000	35926000	36077000	28577000	35019000	36574000	32914000	34631000	24286000	34844000	36255000	31143000	38104000	31475000
Q9CQ54	NADH dehydrogenase [ubiquinone] 1 subunit C2	Ndufc2	4	7299400	16438000	16933000	15460000	16885000	14422000	15674000	21068000	12155000	24987000	10840000	12964000	17499000	12402000	17716000	12065000
Q9CQ75	NADH dehydrogenase [ubiquinone] 1 alpha subcomplex subunit 2	Ndufa2	4	20628000	27532000	41832000	44304000	36839000	34963000	20934000	33773000	29706000	39814000	30492000	45126000	42107000	30174000	39810000	27966000
Q9CQU0	Thioredoxin domain-containing protein 12	Txndc12	4	73128000	78926000	65555000	75825000	76765000	71870000	56359000	81923000	71036000	65037000	70208000	71082000	70197000	69846000	86551000	87733000
Q9CQW1	Synaptobrevin homolog YKT6	Ykt6	4	9968400	10510000	11187000	11352000	9016900	997042	9370800	809263	10108000	841786	9745000	8473200	10001000	8424600	7792500	752936
Q9CQX8	28S ribosomal protein S36, mitochondrial	Mrps36	4	53304000	55519000	60906000	52173000	65626000	69763000	58586000	62585000	67343000	56002000	58425000	58500000	62710000	65045000	56132000	69981000
Q9CR95	Adaptin ear-binding coat-associated protein 1	Necap1	4	9171500	12607000	9403900	8216900	9524200	8609200	9602400	8571500	9068600	10956000	8766400	11570000	8013600	7813400	10696000	10308000
Q9CRB9	MICOS complex subunit Mic19	Chchd3	4	30568000	40855000	51157000	41476000	43074000	51875000	40990000	38736000	46852000	41137000	40032000	43448000	48568000	37392000	39244000	40360000
Q9CS42	Ribose-phosphate pyrophosphokinase 2	Prps2	4	19634000	15779000	16463000	18731000	15446000	21389000	16020000	20915000	20545000	22080000	19540000	17363000	17809000	18607000	14322000	16155000
Q9CWK8	Sorting nexin-2	Snx2	4	16190000	14908000	18927000	15132000	20025000	13672000	21800000	17165000	18675000	16395000	18512000	16813000	22363000	17867000	24634000	15568000
Q9CWU3	Serine/threonine-protein phosphatase 2A 55 kDa regulatory subunit B;Serine/threonine-protein phosphatase 2A 55 kDa regulatory subunit B alpha isoform;Serine/threonine-protein phosphatase 2A 55 kDa regulatory subunit B delta isoform;Serine/threonine-protein phosphatase 2A 55 kDa regulatory subunit B beta isoform	Ppp2r2a;Ppp2r2d;Ppp2r2b	4	12832000	14422000	14722000	11059000	17020000	11464000	17472000	11081000	15139000	13579000	16126000	15873000	12033000	12797000	12320000	11860000
Q9CY73	39S ribosomal protein L44, mitochondrial	Mrpl44	4	12770000	11360000	9042600	10043000	8449800	8858000	9341900	10108000	10196000	9323100	11356000	12341000	11404000	9336600	9275300	14090000
Q9CYA0	Cysteine-rich with EGF-like domain protein 2	Creld2	4	29046000	11950000	14164000	10519000	30567000	60454000	58999000	29142000	7168800	11374000	19756000	16782000	12552000	14896000	23310000	21599000
Q9D0T1	NHP2-like protein 1;NHP2-like protein 1, N-terminally processed	Nhp2l1	4	17321000	16667000	18624000	20909000	19479000	23743000	17106000	20930000	20141000	18732000	18423000	21987000	28114000	19793000	18561000	19284000
Q9D0W5	Peptidyl-prolyl cis-trans isomerase-like 1	Ppil1	4	11610000	9562000	9530900	7928500	9200100	10037000	8263300	8822800	8149300	8127800	11116000	11144000	7531600	10014000	10487000	10125000
Q9D104	Signal recognition particle 19 kDa protein	Srp19	4	28267000	28224000	24768000	23553000	26563000	26831000	20575000	32740000	25897000	21985000	26185000	27047000	26833000	22471000	30866000	34808000
Q9D338	39S ribosomal protein L19, mitochondrial	Mrpl19	4	13425000	19976000	12633000	16148000	14203000	17298000	14311000	14646000	16123000	17642000	18030000	16842000	21516000	16015000	14756000	26173000
Q9D6J5	NADH dehydrogenase [ubiquinone] 1 beta subcomplex subunit 8, mitochondrial	Ndufb8	4	10379000	23094000	35050000	27515000	22663000	22592000	21219000	25061000	21392000	31095000	22724000	30097000	30328000	21090000	26311000	21091000
Q9D7S9	Charged multivesicular body protein 5	Chmp5	4	16012000	16433000	13298000	19007000	18408000	19956000	17566000	16217000	17998000	17417000	23426000	15489000	17352000	15921000	12537000	19438000
Q9D8B3	Charged multivesicular body protein 4b	Chmp4b	4	18493000	13274000	13475000	11022000	13824000	15880000	12740000	12076000	15200000	10263000	17508000	11126000	11319000	15004000	13845000	16449000
Q9D8L3	Translocon-associated protein subunit delta	Ssr4	4	62145000	74903000	96118000	77551000	117040000	94298000	92920000	76886000	80585000	94442000	95984000	95660000	87206000	83941000	95927000	106410000
Q9DBC0	Selenoprotein O	Selo	4	1447100	1651400	1931900	1624100	1494400	1500200	2116900	1367900	1799800	1713800	1660600	1348700	1723600	2128000	1694700	1580200
Q9DCH4	Eukaryotic translation initiation factor 3 subunit F	Eif3f	4	12449000	13071000	15323000	16740000	18726000	16793000	20052000	12892000	14758000	16185000	10804000	16562000	12625000	13901000	16121000	13828000
Q9DCW5	Cytochrome c oxidase subunit 6A, mitochondrial;Cytochrome c oxidase subunit 6A1, mitochondrial	Cox6a1	4	19216000	42804000	35822000	49432000	48362000	33143000	36322000	29517000	35555000	47412000	24164000	52260000	36442000	28466000	41500000	30119000
Q9ERB0	Synaptosomal-associated protein 29	Snap29	4	18006000	14558000	17641000	10328000	8439900	12404000	13851000	10906000	9838200	11932000	18975000	10927000	9946800	12449000	7666200	13469000
Q9ERE7	LDLR chaperone MESD	Mesdc2	4	26357000	23325000	18749000	20417000	23469000	19721000	11827000	25087000	19917000	15218000	25125000	24057000	12555000	17380000	19016000	27916000
Q9ERF3	WD repeat-containing protein 61;WD repeat-containing protein 61, N-terminally processed	Wdr61	4	12978000	11337000	13027000	15308000	12587000	11084000	13123000	11505000	12831000	16856000	13388000	14205000	15070000	17751000	15952000	15842000
Q9ERS2	NADH dehydrogenase [ubiquinone] 1 alpha subcomplex subunit 13	Ndufa13	4	15402000	17330000	25732000	28682000	14069000	18708000	18062000	17198000	15993000	23242000	19057000	24900000	25609000	13608000	25465000	17503000
Q9ESP1	Stromal cell-derived factor 2-like protein 1	Sdf2l1	4	17812000	18883000	18960000	14533000	25281000	21012000	17988000	17622000	19212000	13157000	23357000	19172000	16927000	14609000	24973000	25065000
Q9ET54-3	Palladin	Palld	4	5930600	7388600	6253500	6962900	6198600	7251200	6921000	6216100	7262300	7183000	6026200	7840200	5694600	5275000	6731600	6022500
Q9JJL8	Serine--tRNA ligase, mitochondrial	Sars2	4	893126	4727600	809843	4067200	788762	5324100	3597700	4065400	3958300	4026700	845111	766673	4701600	4048900	3728800	4621600
Q9JKL4	NADH dehydrogenase [ubiquinone] 1 alpha subcomplex assembly factor 3	Ndufaf3	4	9998200	8943600	11595000	9531800	10155000	12512000	10012000	11364000	12494000	11190000	9413600	11375000	16124000	15861000	16322000	6423000
Q9JKX6	ADP-sugar pyrophosphatase	Nudt5	4	24145000	18023000	21958000	19555000	20391000	20622000	19914000	24694000	24321000	20299000	19989000	14704000	18672000	20932000	18880000	18071000
Q9JKY7	Cytochrome P450	Cyp2d22	4	13411000	17205000	18701000	19794000	20576000	12133000	36379000	11952000	18514000	19029000	13324000	19782000	18256000	19434000	22202000	13217000
Q9JLI0	Aldo-keto reductase a	Akr1c12	4	53153000	61985000	63126000	63087000	67576000	60532000	68322000	67603000	67029000	53075000	65746000	73340000	68003000	61698000	68199000	74776000
Q9QZE5	Coatomer subunit gamma-1	Copg1	4	893126	691780	809843	1849400	698670	997042	7145100	575230	729584	1155800	845111	653890	780402	878568	649718	791250
Q9R069	Basal cell adhesion molecule	Bcam	4	4755100	3990500	809843	3363300	3055500	6199600	3965400	809263	3313900	841786	4126400	3943900	2987600	3995800	649718	752936
Q9R0M6	Ras-related protein Rab-9A	Rab9a;Rab9	4	16102000	19145000	19384000	21229000	22956000	19816000	18046000	20044000	20437000	21439000	23461000	24852000	22306000	22079000	22617000	21057000
Q9R112	Sulfide:quinone oxidoreductase, mitochondrial	Sqrdl	4	3086200	4651600	4265300	4855600	4540200	2834200	19366000	809263	4495000	2789500	2829400	3787400	3034400	878568	3015000	5107000
Q9R1R8	Retinol dehydrogenase 11	Rdh11	4	7446200	822315	809843	763642	6973700	997042	11106000	809263	729584	16916000	4305600	4397900	7090400	878568	4963500	752936
Q9WTL7	Acyl-protein thioesterase 2	Lypla2	4	48447000	40020000	41478000	40137000	41282000	38123000	37000000	49752000	47599000	49534000	41778000	50229000	33113000	45727000	37435000	43281000
Q9WUM4	Coronin-1C;Coronin	Coro1c	4	21725000	14825000	18286000	20346000	17408000	19163000	17643000	8611700	15120000	14870000	20369000	18776000	20128000	19334000	17939000	13094000
Q9WVA2	Mitochondrial import inner membrane translocase subunit Tim8 A	Timm8a1	4	185950000	211580000	173040000	195010000	254590000	247300000	191670000	285800000	184900000	174950000	215380000	272530000	264040000	198050000	267790000	367010000
Q9WVT6	Carbonic anhydrase 14	Ca14	4	26801000	45353000	25030000	34338000	28919000	43044000	35859000	43353000	29854000	28754000	27917000	24276000	36263000	31417000	25767000	47934000
Q9Z1P6	NADH dehydrogenase [ubiquinone] 1 alpha subcomplex subunit 7	Ndufa7	4	10097000	16124000	17091000	19781000	16074000	14109000	12389000	12785000	17153000	19473000	13189000	19958000	15644000	16261000	18438000	12441000
Q9Z2C5	Myotubularin	Mtm1	4	8999800	9245200	8122400	7847000	8560700	6621200	7727100	8257700	7205800	7725200	9697600	9232200	9595200	8924100	7344400	10277000
S4R294	Protein PRRC2C	Prrc2c	4	3501200	2589800	3680100	2514100	3409000	3928500	2998200	2572400	2828900	2914200	3405400	3274100	2717400	2889100	3508300	2247700
A0A075B5K2	Immunoglobulin kappa chain variable 9-124	Igkv9-124	3	47526000	822315	27418000	37314000	788762	25589000	865364	809263	729584	12959000	845111	5133500	780402	878568	649718	9479700
A0A075B5M2	Immunoglobulin kappa chain variable 4-61	Igkv4-61	3	4331400	388030000	5097300	6528600	3631400	13840000	3743900	809263	6702800	6727900	845111	2141800	1244900	878568	649718	3868200
A0A075B5R1	Immunoglobulin heavy variable 5-17	Ighv5-17	3	12450000	822315	809843	763642	788762	7365200	865364	809263	729584	841786	3012300	766673	780402	68270000	649718	752936
A0A087WQT6	Caspase-8;Caspase-8 subunit p18;Caspase-8 subunit p10	Casp8	3	5555400	7742800	9113900	6963300	6349600	5601200	7952400	8124800	6717400	9131700	6424400	7234900	780402	8543700	5933000	5769600
A0A0A6YWB0	Muscleblind-like protein 1	Mbnl1	3	10056000	12115000	10162000	9389600	11888000	10775000	9813900	11139000	9244000	8503300	9286800	10836000	10884000	9013600	10510000	10649000
A0A0B4J1I6	Immunoglobulin kappa variable 4-69	Igkv4-69	3	893126	822315	2506600	214810000	788762	997042	865364	2911700	2082400	841786	845111	766673	780402	2611100	3676800	752936
A0A0B4J1N0	Immunoglobulin heavy variable 1-76	Ighv1-76	3	62266000	9086900	12491000	22719000	788762	9296800	5887000	6017400	729584	16185000	5943300	8320000	780402	878568	649718	752936
A0A0G2JDW7	40S ribosomal protein S27	Rps27	3	70840000	50225000	54328000	50536000	50875000	61664000	62949000	54526000	50135000	47600000	57604000	51971000	61217000	59986000	62446000	58660000
A0A0G2JEA9	RNA-binding protein 8A	Rbm8a	3	54004000	43204000	41027000	47508000	40236000	74397000	41577000	50078000	50763000	38925000	57535000	45280000	44630000	47780000	38895000	46781000
A0A0G2JEC4	Endophilin-B1	Sh3glb1	3	26041000	21401000	14641000	25787000	22301000	997042	23069000	18992000	19584000	25676000	12740000	29315000	780402	23492000	24349000	33902000
A0A0G2JER9	DnaJ homolog subfamily B member 6	Dnajb6	3	6114300	8436500	6854200	5577400	9120300	6717300	8091600	4753900	6983600	6472300	8720400	7347700	8917900	6830500	6700600	6300400
A0A0G2JFP4	Ferric-chelate reductase 1	FRRS1	3	11289000	11719000	13538000	763642	22458000	22920000	865364	16625000	17647000	841786	18141000	13724000	24972000	20248000	24447000	19610000
A0A0J9YVJ0	Maltase-glucoamylase	Mgam	3	12548000	13154000	16390000	13250000	13531000	14369000	10646000	10962000	11331000	15382000	15323000	18781000	18233000	12358000	14465000	12501000
A0A0R4IZW5	Cadherin-1;E-Cad/CTF1;E-Cad/CTF2;E-Cad/CTF3	Cdh1	3	893126	822315	809843	763642	4602700	9304700	865364	4724000	3646400	841786	3456100	766673	6377800	4509000	4608600	11449000
A0A0R4J079	Golgi resident protein GCP60	Acbd3	3	3811100	3054500	3995000	3421700	4288900	3206000	4422100	3256100	3049500	3847700	845111	2606100	3165800	2989100	3072200	2704300
A0A0R4J1E8	Putative deoxyribonuclease TATDN1	Tatdn1	3	20221000	21719000	20498000	17028000	12457000	26347000	17317000	22301000	19391000	841786	16891000	20067000	20664000	16265000	13672000	23173000
A0A140T8N5	Immunoglobulin kappa variable 6-23	Igkv6-23	3	235940000	19173000	22259000	33713000	14367000	13367000	11564000	3909300	7002200	20307000	7456100	9450500	6279600	7337300	3769000	6297900
A0A171KXD3	Protein arginine N-methyltransferase 1	Prmt1	3	13360000	10510000	8326900	763642	8863700	10838000	10671000	809263	7519500	841786	7098400	766673	7916300	7762800	649718	10743000
A0A1D5RLR0	Translin-associated protein X	Tsnax	3	26040000	23912000	20888000	23793000	29945000	25651000	22253000	26879000	26335000	23377000	27439000	28741000	780402	21999000	649718	28851000
A0A1D5RLS1	Epidermal growth factor receptor substrate 15-like 1	Eps15l1	3	5513100	822315	3601300	3421500	5182200	3867900	2955900	809263	3939200	4217400	845111	4414800	780402	1737400	2584000	752936
A0A1L1SSY9	39S ribosomal protein L4, mitochondrial	Mrpl4	3	22843000	24581000	22323000	19043000	21091000	19408000	16113000	19221000	19101000	19895000	23143000	22601000	24008000	19680000	21630000	28627000
A0A1L1STC6	Nesprin-1	Syne1	3	14847000	18217000	11920000	15253000	14719000	18687000	14510000	25598000	12286000	16966000	16646000	17027000	18320000	13702000	17193000	27925000
A0A1L1SVG1	Leucine-rich repeat flightless-interacting protein 2	Lrrfip2	3	5913600	5881000	5367200	4897500	5899900	6615700	6112300	4538200	6651900	5696900	7186200	4545700	6613000	6256200	3348600	4861900
A0A1W2P7H9	Enhancer of rudimentary homolog	Erh	3	244460000	185240000	197160000	172300000	155520000	260430000	186090000	180090000	136330000	158860000	253800000	192970000	196560000	244750000	152220000	217850000
A0A1Y7VK19	Iron-sulfur cluster assembly 2 homolog, mitochondrial	Isca2	3	34046000	36182000	28982000	33500000	34203000	37019000	29046000	29185000	33352000	27562000	33663000	36282000	29349000	31565000	42726000	44668000
A0A2I3BRK6	Transcription and mRNA export factor ENY2	Eny2	3	23276000	22359000	27115000	28115000	22385000	28907000	23573000	29390000	27434000	27280000	27183000	23860000	33144000	25272000	29826000	29600000
A0A2R8VI25	Poly(rC)-binding protein 2;Poly(rC)-binding protein 3	Pcbp2;Pcbp3	3	13369000	16515000	16997000	18126000	19741000	15093000	24259000	13758000	17601000	20336000	17108000	21658000	19981000	15013000	17907000	18851000
A0A338P7E3	Ribonuclease T2B	Rnaset2b	3	11985000	15132000	14626000	12496000	15478000	12791000	15821000	12193000	13399000	13520000	16776000	14388000	13913000	13064000	15461000	12232000
A0A3Q4EBK4	Myc box-dependent-interacting protein 1	Bin1	3	2902700	6700100	4689000	4957100	5127400	3957000	4510900	5851900	4545900	3932600	4057000	5855300	5199900	4002600	6311000	6327400
A0A494B9B9	Succinate dehydrogenase assembly factor 2, mitochondrial	Sdhaf2	3	12982000	14687000	15992000	17752000	16478000	19767000	15844000	15882000	18408000	17229000	21396000	18197000	17862000	17765000	15828000	21282000
A0A494B9H5	39S ribosomal protein L11, mitochondrial	Mrpl11	3	19001000	17245000	15161000	22376000	16773000	23368000	13747000	23532000	16365000	14288000	16176000	18795000	22347000	20093000	23020000	30192000
A0A668KLV1	Cell adhesion molecule 1	Cadm1	3	20477000	24554000	17546000	20926000	15701000	17454000	18884000	14582000	15751000	17877000	18756000	17564000	12401000	18103000	16243000	24707000
A2A547	Ribosomal protein L19;60S ribosomal protein L19	Rpl19	3	32803000	25868000	26038000	20632000	25161000	27042000	29107000	26053000	23012000	20964000	22249000	23866000	24857000	20318000	30338000	27432000
A2A5R8	Double-stranded RNA-binding protein Staufen homolog 1	Stau1	3	6489900	11385000	7607700	6336600	7694400	4502900	6827500	5175500	5415100	6516300	8644500	7119400	6724400	6368300	7490800	5463800
A2A7K5	C-Myc-binding protein	Mycbp	3	112160000	110630000	104420000	136920000	129630000	115940000	96977000	127910000	99135000	107810000	134140000	149260000	138660000	105660000	126100000	188280000
A2A8E2	UPF0587 protein C1orf123 homolog	0610037L13Rik	3	48246000	44431000	44391000	54947000	43620000	63394000	39504000	60087000	53748000	48012000	52300000	55781000	48240000	49407000	55307000	69216000
A2AA71	Protein transport protein Sec24A	Sec24a	3	893126	822315	809843	763642	788762	997042	865364	809263	729584	841786	845111	766673	780402	878568	649718	752936
A2AJK8	Tetratricopeptide repeat protein 1	Ttc1	3	13147000	13516000	12307000	10191000	12417000	15154000	12495000	11376000	12423000	10962000	13567000	12278000	12019000	14053000	13998000	13623000
A2AMH3	Choline transporter-like protein 1	Slc44a1	3	14150000	5192300	5240300	8458400	788762	3450300	865364	809263	729584	6793200	845111	766673	780402	6105200	649718	752936
A2AU62	RNA-binding protein Raly	Raly	3	14083000	15878000	14927000	14606000	13537000	13223000	13980000	14155000	13850000	16125000	15317000	15880000	14849000	14114000	14803000	14625000
A2AWT6	Nucleolar transcription factor 1	Ubtf	3	9648100	11756000	13121000	763642	788762	17178000	12055000	10768000	729584	11032000	16420000	12422000	15701000	7585600	16701000	752936
A7E1Z5	Anion exchange protein;Electrogenic sodium bicarbonate cotransporter 1	Slc4a4	3	8966300	13374000	11179000	9667300	10297000	10581000	9796200	14430000	12321000	9780700	12467000	13848000	11092000	8059100	9237900	8072800
B1AUB6	Nuclear factor 1;Nuclear factor 1 A-type	Nfia;Nfix	3	893126	3286100	3595800	3134400	3293800	3186100	3150600	2744900	3106600	3024300	2573200	2296400	3774000	2912500	2915000	2771600
B1AWT2	Ras-related GTP-binding protein C;Ras-related GTP-binding protein D	Rragd;Rragc	3	6812900	6459500	6053600	5922400	9256000	5530200	6131800	4494400	4686200	841786	4682500	7179700	780402	5405900	9683500	7740900
B1AZ46	Brain-specific angiogenesis inhibitor 1-associated protein 2	Baiap2	3	9941100	9135700	9027900	7141300	8393900	8894200	9932800	7759600	7343000	9672200	7207300	13422000	8467900	6045400	10996000	9990900
B2KGA7	Protein archease	Zbtb8os	3	53854000	36489000	39415000	51189000	44665000	51481000	35469000	55258000	47673000	37886000	40339000	50497000	50850000	37973000	46374000	45789000
B2KGR2	LanC-like protein 1	Lancl1	3	13718000	8213100	8435900	763642	8936500	9103200	9512500	7020300	10220000	5725900	9432900	8534200	9006000	8378800	7831100	8668700
B2ZRS5	DEP domain-containing mTOR-interacting protein	Deptor	3	4137400	6293400	7503200	3869200	8027800	4934400	6028100	3925300	4205300	6220000	7719600	6830000	5494900	6469200	5389800	4760200
C5NSA7	Tryptophan 2,3-dioxygenase	Tdo2	3	1556400	3590600	2288100	2698500	3356200	2203500	6965800	3041900	2369000	2427900	3702900	2725700	3924300	4741000	2797900	3847900
D3YTL5	Macrophage-capping protein	Capg	3	16503000	822315	12690000	10745000	788762	11800000	865364	6987300	5503000	8441800	9810100	9489600	780402	11377000	649718	752936
D3YTQ9	40S ribosomal protein S15	Rps15	3	146440000	120730000	119820000	132370000	161360000	136200000	107120000	139060000	122180000	115270000	137850000	134630000	122090000	131310000	159640000	136490000
D3YUW7	Cingulin	Cgn	3	893126	3288500	2892400	2332800	4807300	2489100	3085600	3209800	2490200	2821500	3291000	3448000	4499900	3110900	3303100	752936
D3YVA2	Neurocalcin-delta	Ncald	3	17097000	17724000	21462000	23361000	20689000	22105000	18673000	20246000	18286000	17759000	22673000	20267000	12639000	14580000	24560000	24850000
D3YX62	Heme oxygenase 2	Hmox2	3	7494900	7804500	10259000	763642	10769000	10966000	7588000	809263	7864900	841786	6571900	9884400	780402	878568	9820000	11813000
D3YXP6	Phosphomevalonate kinase	Pmvk	3	8692000	8930600	8668000	763642	788762	997042	865364	809263	8397700	7969200	845111	766673	6855800	6061600	649718	752936
D3Z2X5	Platelet-activating factor acetylhydrolase IB subunit gamma	Pafah1b3	3	42196000	39964000	82591000	29394000	58514000	49617000	22318000	46320000	37154000	32786000	40353000	39056000	46891000	87260000	47142000	70426000
D3Z3S1	Prolactin regulatory element-binding protein	Preb	3	893126	2445200	2522200	2407300	788762	997042	4202400	809263	2599800	841786	845111	766673	780402	878568	2720800	2466500
D3Z4W3	Proline-rich AKT1 substrate 1	Akt1s1	3	17125000	16818000	17329000	10267000	14030000	14473000	14135000	11365000	12242000	11794000	16241000	12723000	14108000	11922000	12582000	15054000
D3Z7F0	L-lactate dehydrogenase;L-lactate dehydrogenase B chain	Ldhb	3	7423000	822315	809843	7448500	10364000	997042	865364	809263	729584	7388300	845111	766673	44407000	6580200	649718	752936
D6RFN5	Ninjurin-1	Ninj1	3	18894000	20651000	18001000	16007000	18829000	15091000	22182000	15289000	16913000	16643000	24215000	16879000	20181000	17286000	17752000	18191000
E0CY18	AN1-type zinc finger protein 2B	Zfand2b	3	7999200	9090900	8630400	8874700	9380100	8675700	5477100	10348000	11613000	8269300	8968600	9169500	9221300	7632500	9985600	12269000
E0CY82	Programmed cell death protein 10	Pdcd10	3	8574700	9434800	10044000	7838700	10374000	12267000	7226100	7541100	8777900	9249500	10425000	9632300	8230000	8323600	8986500	9138900
E0CZ04	Gamma-glutamylaminecyclotransferase	Ggact	3	34697000	31623000	23683000	22095000	26526000	21932000	25782000	32546000	36795000	20521000	21859000	23603000	25326000	24063000	33175000	21967000
E9PVN6	Synaptojanin-2-binding protein	Gm20498;Synj2bp	3	35250000	45278000	46760000	53126000	47639000	52744000	40573000	62609000	44606000	53184000	42541000	53022000	43850000	45356000	44457000	55932000
E9PXC3	Cytochrome P450, family 2, subfamily c, polypeptide 69	Cyp2c69	3	19091000	822315	12126000	23869000	36868000	12991000	52828000	21942000	19723000	33303000	16653000	25792000	14725000	14036000	36215000	31152000
E9Q1T9	Exportin-2	Cse1l	3	867490	1349400	1159000	1309200	788762	997042	3655800	1060000	729584	1066300	820370	1137400	822560	1104900	649718	1354900
E9Q2M5	PERQ amino acid-rich with GYF domain-containing protein 2	Gigyf2	3	3075700	2969200	2632200	2394500	2441000	3317200	2618800	2538800	2749100	2397400	3271200	3087300	2717100	2794200	2393300	3179800
E9Q6U4	Prefoldin subunit 4	Pfdn4	3	28893000	26001000	31823000	22611000	26805000	28116000	31205000	18099000	27405000	26747000	28810000	18391000	27282000	23313000	32709000	22051000
E9Q705	BolA-like protein 3	Bola3	3	11057000	12472000	10716000	9786500	10317000	10621000	10252000	11572000	12369000	9819700	13067000	10030000	10522000	10666000	10786000	11672000
E9Q9X1	Dystonin	Dst	3	697620000	639420000	741410000	589880000	573830000	649080000	604400000	740480000	723710000	795600000	588430000	516440000	663960000	797670000	584260000	438780000
E9QNW6	Platelet-activating factor acetylhydrolase 2, cytoplasmic	Pafah2	3	7311000	6289700	6673500	6404500	788762	997042	10028000	7503500	5690700	7831300	845111	4997900	780402	878568	10038000	752936
F6RBR6	NADH dehydrogenase [ubiquinone] 1 alpha subcomplex subunit 12	Ndufa12	3	2929700	6713700	7464000	7898000	7722100	5099900	7069800	5129100	5443800	9249100	4538500	7731100	6713800	5373700	8114400	3984000
F6SLP4	Endoplasmic reticulum-Golgi intermediate compartment protein 1	Ergic1	3	20281000	18310000	14235000	14304000	21857000	6949100	14361000	11598000	12176000	21567000	13674000	14130000	12139000	11599000	14086000	13584000
F6T9K1	Dr1-associated corepressor	Drap1	3	17844000	17326000	16016000	19423000	13878000	18418000	12877000	19399000	17104000	17184000	18383000	18149000	16517000	17959000	16791000	20322000
F7A1B4	Endoglin	Eng	3	893126	822315	809843	5801300	5973900	6122300	865364	7048300	729584	841786	845111	4475900	5754100	878568	649718	752936
F8WHL2	Coatomer subunit alpha;Coatomer subunit alpha;Xenin;Proxenin	Copa	3	893126	3233700	809843	3273000	788762	997042	9373300	809263	729584	841786	845111	766673	780402	878568	3013400	752936
G3UVV4	Hexokinase;Hexokinase-1	Hk1	3	6562600	5526200	6408500	8548200	6047600	4488200	5975600	4707200	5366100	4191100	6109500	6413100	4964700	5841800	5426800	4913500
G3UY42	Polyadenylate-binding protein 2	Pabpn1;Gm20521	3	25957000	25912000	26699000	27424000	32495000	26652000	19557000	28805000	22414000	26745000	23265000	32391000	28548000	22795000	30211000	32093000
G3UYD5	Bifunctional UDP-N-acetylglucosamine 2-epimerase/N-acetylmannosamine kinase;UDP-N-acetylglucosamine 2-epimerase (hydrolyzing);N-acetylmannosamine kinase	Gne	3	1386300	1766900	4046100	2913200	4567500	2708300	7237000	2475800	3728400	3892000	2780100	2279600	2705900	3833900	4086700	2069400
G3X9I1	Protein FAM3C	Fam3c	3	15211000	14959000	14282000	17884000	14284000	15098000	8697000	14385000	11136000	17733000	13927000	15071000	14952000	12982000	15324000	18513000
G5E8R1	Tropomyosin 1, alpha	Tpm1	3	29876000	29626000	25829000	24777000	25517000	35549000	26101000	26038000	28117000	28171000	33278000	31372000	23672000	30904000	26295000	30071000
J3QNY6	Bile salt export pump	Abcb11	3	893126	822315	2088900	763642	2186600	997042	13309000	809263	1682600	841786	845111	766673	945340	762840	3081900	752936
O08692	Neutrophilic granule protein	Ngp	3	21229000	29123000	29974000	27106000	26806000	26175000	10029000	809263	23055000	18035000	12715000	20952000	27046000	20945000	25463000	24684000
O08915	AH receptor-interacting protein	Aip	3	18418000	25233000	23239000	19769000	26312000	30839000	25839000	20758000	24240000	18242000	25432000	22828000	24100000	21914000	29257000	25717000
O09165	Calsequestrin-1;Calsequestrin	Casq1	3	893126	822315	809843	763642	12721000	9521400	865364	7888200	729584	841786	845111	766673	80657000	878568	649718	752936
O35403	Amine sulfotransferase;Sulfotransferase	Sult3a1	3	893126	2450600	809843	763642	11854000	997042	7007800	7266300	8330000	841786	6731700	766673	6845900	878568	10940000	752936
O35435	Dihydroorotate dehydrogenase (quinone), mitochondrial	Dhodh	3	8687200	10460000	7559900	12281000	10445000	10756000	9093200	10407000	8846900	9639400	9196700	8363700	12443000	11025000	15952000	14179000
O35453	Serine protease hepsin;Serine protease hepsin non-catalytic chain;Serine protease hepsin catalytic chain	Hpn	3	6617400	8882500	6582800	5413300	8419000	7096300	6341700	7893800	7271400	6497200	8092900	6054000	6265600	6016900	7781200	6891600
O35566	CD151 antigen	Cd151	3	2260400	1275400	1861100	885010	930010	1743200	1451900	892160	134470	907840	1968000	1276500	1701900	1621600	468270	1122400
O35901	U6 snRNA-associated Sm-like protein LSm2	Lsm2	3	69584000	50515000	56317000	55569000	62028000	85962000	47995000	68002000	52994000	56990000	59828000	71443000	53621000	62838000	51028000	57956000
O35943	Frataxin, mitochondrial;Frataxin intermediate form;Frataxin mature form	Fxn	3	71123000	51869000	61232000	59827000	47078000	70795000	59205000	63963000	67543000	58924000	64742000	61639000	53324000	59290000	47507000	72784000
O54909	Retinol dehydrogenase 16	Rdh16	3	21459000	43679000	25787000	37292000	23694000	11395000	26194000	21762000	24870000	44369000	26105000	23041000	30163000	20348000	16054000	752936
O55137	Acyl-coenzyme A thioesterase 1	Acot1	3	10433000	20262000	17348000	13446000	15807000	5425100	25641000	7931200	16638000	17040000	13051000	15744000	13702000	19497000	10538000	7355500
O70404	Vesicle-associated membrane protein 8	Vamp8	3	25473000	25090000	21732000	20048000	27419000	26288000	22571000	22012000	23572000	21210000	28218000	24219000	23712000	26169000	29127000	24276000
O70503-2	Very-long-chain 3-oxoacyl-CoA reductase	Hsd17b12	3	893126	6076700	6076600	5597100	5777000	997042	26759000	809263	729584	6434800	845111	766673	780402	878568	4977700	3913700
O70591	Prefoldin subunit 2	Pfdn2	3	44350000	36442000	38024000	40059000	25992000	47759000	33996000	39466000	41608000	31989000	44064000	32276000	33987000	41798000	35372000	42234000
O88543	COP9 signalosome complex subunit 3	Cops3	3	16253000	16215000	16143000	14307000	13003000	18335000	16534000	16003000	15293000	18082000	13636000	15518000	13873000	12586000	14583000	16429000
O88696	ATP-dependent Clp protease proteolytic subunit, mitochondrial	Clpp	3	17410000	10638000	17922000	16087000	13123000	17468000	24279000	12697000	16095000	17819000	16113000	16335000	13049000	13653000	18472000	20908000
O89086	RNA-binding protein 3	Rbm3	3	37063000	43365000	68863000	32007000	49359000	44984000	46315000	45519000	51915000	21675000	54487000	59559000	50890000	65068000	49207000	47763000
P01645	Immunoglobulin kappa chain V-V region HP 93G7;Immunoglobulin kappa chain V-V region HP R16.7;Immunoglobulin kappa chain V-V region HP 123E6;Immunoglobulin kappa chain V-V region HP 124E1		3	19626000	24416000	254960000	62422000	19600000	33933000	865364	809263	3739200	34326000	7483100	327330000	11977000	63562000	649718	4116400
P01887	Beta-2-microglobulin	B2m	3	329070000	282530000	256110000	249110000	268460000	308660000	251420000	269000000	253060000	241000000	354610000	263960000	245640000	302640000	243310000	277890000
P05213	Tubulin alpha-1B chain;Tubulin alpha-1C chain;Tubulin alpha-1A chain;Tubulin alpha-3 chain;Tubulin alpha-8 chain	Tuba1b;Tuba1c;Tuba1a;Tuba3a;Tuba8	3	30087000	44357000	53030000	54435000	65445000	39722000	102730000	50527000	44674000	52274000	51386000	46781000	48009000	46510000	58579000	28606000
P09813	Apolipoprotein A-II;Proapolipoprotein A-II	Apoa2	3	140990000	335360000	279250000	218910000	274820000	143620000	312520000	261930000	246080000	247940000	301740000	303240000	266460000	285990000	234740000	167790000
P09925	Surfeit locus protein 1	Surf1	3	11108000	13272000	809843	763642	788762	9936000	865364	809263	729584	12078000	845111	16428000	10985000	13330000	15934000	752936
P11680	Properdin	Cfp	3	4586200	2433100	2743100	1947000	1867200	2761200	2630500	2905000	2006700	1907300	4208600	1849000	2096500	3091200	2053400	3287100
P11862	Growth arrest-specific protein 2	Gas2	3	3213400	2376600	3497300	1321800	848310	3026100	2138000	963450	1916800	1608300	2211100	1528700	1301100	1858900	984520	2282600
P12815-2	Programmed cell death protein 6	Pdcd6	3	28498000	34215000	37163000	35323000	38145000	35502000	32186000	31269000	38706000	33663000	37159000	36144000	28775000	27999000	34264000	41017000
P14115	60S ribosomal protein L27a	Rpl27a	3	147740000	84985000	98296000	96173000	100830000	103260000	150260000	129730000	111780000	92946000	98328000	81206000	98152000	93072000	120960000	122210000
P14438	H-2 class II histocompatibility antigen, A-U alpha chain;H-2 class II histocompatibility antigen, A-B alpha chain;Beta-2-microglobulin	H2-Aa	3	30808000	16509000	13840000	15820000	11572000	18007000	11498000	11671000	12422000	15399000	22963000	10989000	8878900	17177000	17694000	14109000
P14483	H-2 class II histocompatibility antigen, A beta chain;H-2 class II histocompatibility antigen, A-F beta chain;H-2 class II histocompatibility antigen, A-S beta chain;H-2 class II histocompatibility antigen, A-U beta chain	H2-Ab1	3	24536000	10303000	9716300	8131800	8878400	8078900	7771400	4989400	5891300	8199100	16446000	7008400	4654200	9338200	6861200	6997300
P14685	26S proteasome non-ATPase regulatory subunit 3	Psmd3	3	893126	2850200	2312400	2877600	788762	997042	11780000	809263	2219900	2243400	845111	766673	2051200	2703300	649718	2619900
P15864	Histone H1.2	Hist1h1c	3	142810000	177080000	133670000	161480000	121730000	204410000	122890000	124520000	82145000	194920000	93275000	185250000	253970000	194320000	117590000	71497000
P16301	Phosphatidylcholine-sterol acyltransferase	Lcat	3	14534000	13699000	11593000	11190000	12320000	14830000	11725000	11367000	13194000	13513000	14729000	14688000	12800000	12054000	12416000	15859000
P21126	Ubiquitin-like protein 4A	Ubl4a	3	893126	822315	9177000	5541500	6582800	5794100	865364	6947200	4217400	6247800	6506400	4915700	6065500	6648700	6110200	5864600
P22599	Alpha-1-antitrypsin 1-2	Serpina1b	3	34668000	36560000	61241000	47349000	49500000	41319000	56758000	41180000	50965000	48174000	45825000	47112000	40958000	41185000	39370000	27998000
P24721	Asialoglycoprotein receptor 2	Asgr2	3	25026000	20205000	22158000	16292000	25878000	17431000	23662000	20746000	21625000	8810000	20553000	21550000	21372000	21298000	25402000	20421000
P26262	Plasma kallikrein;Plasma kallikrein heavy chain;Plasma kallikrein light chain	Klkb1	3	12615000	8184300	9727200	15109000	11368000	11597000	7846700	12866000	8875900	9893000	8741200	10274000	10618000	9117400	13183000	9630800
P27786	Steroid 17-alpha-hydroxylase/17,20 lyase	Cyp17a1	3	7863200	9985400	6337000	16037000	5259600	4116500	18840000	5762800	6466300	18178000	4552800	5313000	5060500	6971700	3732600	5469700
P28738	Kinesin heavy chain isoform 5C	Kif5c	3	10839000	12639000	27308000	13171000	24253000	10336000	31297000	10547000	13765000	12232000	14589000	10094000	19043000	13708000	9199900	6720200
P30412	Peptidyl-prolyl cis-trans isomerase C	Ppic	3	13885000	8162300	6599100	10914000	12329000	15860000	7846500	9873100	8495100	841786	10024000	7874400	13427000	12649000	8893300	17821000
P31725	Protein S100-A9	S100a9	3	280480000	195500000	235890000	190580000	174280000	217280000	68019000	76396000	168330000	114380000	126340000	171150000	232370000	164910000	176200000	220120000
P32233	Developmentally-regulated GTP-binding protein 1	Drg1	3	10777000	18911000	16175000	11547000	16715000	15196000	15880000	20301000	14433000	16732000	15814000	17234000	15409000	13682000	16297000	20770000
P35282	Ras-related protein Rab-21	Rab21	3	12585000	12412000	8912400	8401800	13701000	11170000	15566000	12672000	8197200	8260600	12737000	9967400	11384000	9075000	8362100	18371000
P35762	CD81 antigen	Cd81	3	54003000	53044000	38212000	43086000	53792000	51098000	42561000	47213000	40155000	36603000	50928000	57857000	47203000	34141000	47744000	57240000
P43406	Integrin alpha-V;Integrin alpha-V heavy chain;Integrin alpha-V light chain	Itgav	3	6040800	6700800	7479000	5753500	5846400	11457000	6423900	7166300	6416900	7523300	14249000	5902400	780402	7457900	6178300	14948000
P46737	Lys-63-specific deubiquitinase BRCC36	Brcc3	3	10872000	11010000	9749000	16932000	14238000	12937000	9360400	12007000	8509000	11594000	9126300	9970300	13328000	14651000	12104000	13710000
P46938	Transcriptional coactivator YAP1	Yap1	3	13506000	11121000	12047000	10171000	10397000	11668000	10536000	8705900	10909000	11388000	12218000	10570000	11263000	10364000	12552000	11044000
P47758	Signal recognition particle receptor subunit beta	Srprb	3	893126	15324000	12390000	14700000	14051000	13289000	12054000	10958000	10735000	13675000	11502000	12309000	9137400	10685000	16055000	12933000
P49442	Inositol polyphosphate 1-phosphatase	Inpp1	3	893126	822315	8750900	763642	7662200	997042	8211700	6888400	8066000	7512800	845111	6127900	7680400	878568	8363300	752936
P49962	Signal recognition particle 9 kDa protein	Srp9	3	50440000	48538000	50722000	53964000	48751000	57171000	46494000	56132000	55396000	50150000	65098000	55363000	45560000	48869000	49606000	49799000
P50428	Arylsulfatase A	Arsa	3	15263000	21803000	809843	16627000	788762	17012000	865364	18348000	16008000	16463000	19084000	19785000	16162000	19996000	16716000	23997000
P51658	Estradiol 17-beta-dehydrogenase 2	Hsd17b2	3	893126	4300800	809843	6814300	10131000	997042	12922000	6433300	5479500	7381900	5233400	7318300	7959100	6044500	8450900	752936
P51667	Myosin regulatory light chain 2, ventricular/cardiac muscle isoform	Myl2	3	893126	822315	809843	763642	8616000	997042	865364	809263	729584	841786	845111	766673	22858000	878568	649718	752936
P56135	ATP synthase subunit f, mitochondrial	Atp5j2	3	155840000	182630000	155030000	160160000	195350000	161030000	200260000	149930000	139410000	157040000	129940000	142050000	164270000	154340000	172990000	187110000
P56212	cAMP-regulated phosphoprotein 19	Arpp19	3	14695000	18304000	17359000	13377000	14068000	17053000	15786000	18548000	16287000	17419000	20989000	14330000	15986000	13368000	15988000	15387000
P56394	Cytochrome c oxidase copper chaperone	Cox17	3	17731000	4466800	5327500	2700000	4733800	14955000	5145100	4293500	4146200	5191600	996020	4254500	4650300	5610600	3107300	13275000
P56812	Programmed cell death protein 5	Pdcd5	3	69607000	61989000	53681000	84922000	58815000	71116000	54863000	76134000	64987000	65277000	69494000	62593000	63940000	63788000	78836000	85415000
P61021	Ras-related protein Rab-5B	Rab5b	3	40431000	52956000	46947000	48847000	52389000	39783000	46280000	50954000	43488000	46126000	54258000	55177000	37311000	43771000	46335000	43815000
P61804	Dolichyl-diphosphooligosaccharide--protein glycosyltransferase subunit DAD1	Dad1	3	27325000	26742000	27965000	5131400	29687000	27691000	37521000	27552000	22108000	32555000	35993000	28915000	28135000	17979000	26028000	19498000
P61924	Coatomer subunit zeta-1	Copz1	3	15127000	19333000	22534000	20690000	18771000	21687000	22272000	19030000	19450000	20972000	20799000	21407000	17882000	17744000	21424000	16013000
P62274	40S ribosomal protein S29	Rps29	3	76370000	70960000	79744000	71002000	81016000	85949000	68228000	76013000	81604000	46658000	83156000	70027000	84504000	78462000	84834000	95114000
P62309	Small nuclear ribonucleoprotein G	Snrpg	3	76438000	63022000	65924000	58437000	54197000	74997000	56614000	60150000	50808000	51257000	71636000	56385000	58984000	63791000	61762000	87934000
P62315	Small nuclear ribonucleoprotein Sm D1	Snrpd1	3	76699000	70678000	62387000	62563000	76031000	86113000	59153000	67578000	55865000	59548000	72104000	63775000	70855000	69576000	63708000	81725000
P62627	Dynein light chain roadblock-type 1	Dynlrb1	3	39869000	32449000	42217000	42190000	44481000	48785000	32889000	45610000	38473000	40847000	46094000	38586000	33417000	36102000	38497000	48584000
P62855	40S ribosomal protein S26	Rps26	3	144570000	100120000	93836000	95023000	133410000	122230000	111420000	125640000	107230000	95700000	107190000	100610000	122630000	110660000	130430000	146170000
P62874	Guanine nucleotide-binding protein G(I)/G(S)/G(T) subunit beta-1	Gnb1	3	20185000	19457000	25311000	21199000	21654000	21232000	20223000	18686000	18057000	21049000	20852000	20840000	18239000	20317000	15448000	20241000
P62900	60S ribosomal protein L31	Rpl31	3	198280000	167970000	183160000	161630000	180960000	156630000	191120000	212670000	158440000	155150000	140340000	156890000	182170000	158940000	216040000	207840000
P62911	60S ribosomal protein L32	Rpl32	3	35035000	19459000	18233000	17338000	22234000	20420000	29790000	21993000	21295000	15108000	17944000	18366000	21506000	18312000	28723000	23425000
P67984	60S ribosomal protein L22	Rpl22	3	220730000	217130000	218190000	191920000	254850000	189630000	195400000	205460000	203700000	186610000	189630000	217020000	212680000	202090000	233120000	324240000
P70245	3-beta-hydroxysteroid-Delta(8),Delta(7)-isomerase	Ebp	3	15346000	20368000	36751000	42471000	33188000	21380000	94160000	18254000	26548000	26070000	23241000	17671000	28215000	20318000	26073000	19427000
P70362	Ubiquitin fusion degradation protein 1 homolog	Ufd1l	3	18551000	30489000	23978000	23540000	29153000	20598000	19661000	21178000	17831000	21227000	28093000	23572000	24376000	17588000	24902000	23296000
P70452	Syntaxin-4	Stx4	3	15380000	12859000	18046000	14777000	16763000	19375000	16420000	15368000	16572000	15136000	18446000	14794000	15246000	18052000	13238000	14118000
P97370	Sodium/potassium-transporting ATPase subunit beta-3	Atp1b3	3	16783000	24465000	26929000	22278000	23495000	20657000	23296000	21230000	22495000	25530000	20511000	23963000	20477000	23851000	26364000	19529000
P97379-2	Ras GTPase-activating protein-binding protein 2	G3bp2	3	8428200	11726000	9547500	8204900	9432700	7566800	10276000	6451300	8589500	9632300	9771000	7345100	7264300	9488300	9411800	6352500
P97822-2	Acidic leucine-rich nuclear phosphoprotein 32 family member E	Anp32e	3	5749600	10036000	14505000	10022000	11565000	10446000	8848000	809263	9209500	10438000	11390000	10996000	7910300	11366000	8468300	11761000
P99028	Cytochrome b-c1 complex subunit 6, mitochondrial	Uqcrh	3	686520000	790640000	717550000	807990000	841260000	971850000	726180000	730430000	756920000	721500000	875000000	877780000	913660000	775560000	878990000	1029500000
Q02257	Junction plakoglobin	Jup	3	6529800	9464300	11919000	9622200	11236000	13696000	10977000	10028000	9272500	11070000	7863700	9732400	9847100	8216800	11325000	12496000
Q03958	Prefoldin subunit 6	Pfdn6	3	37365000	30991000	30469000	33854000	27189000	40212000	26677000	35563000	36207000	31508000	38587000	31349000	32801000	37986000	28073000	35641000
Q04750	DNA topoisomerase 1	Top1	3	1056600	896400	898950	778850	553970	1160200	887000	519130	343360	1003200	1399500	588710	947120	1091800	324140	550330
Q06890	Clusterin;Clusterin beta chain;Clusterin alpha chain	Clu	3	893126	822315	3964300	763642	788762	997042	865364	3240000	3080800	3536800	3912600	766673	3965600	878568	3619400	3293700
Q09200	Beta-1,4 N-acetylgalactosaminyltransferase 1	B4galnt1	3	4632900	7819900	4922800	763642	7706000	5596000	4773300	3218800	6645700	841786	9270800	7102900	6337600	878568	649718	752936
Q3B7Z2-2	Oxysterol-binding protein 1	Osbp	3	11145000	10741000	9943200	8384000	12781000	9800400	10381000	9426700	9104000	9904200	11375000	10734000	11031000	10005000	9050300	12584000
Q3LFS9	Carcinoembryonic antigen-related cell adhesion molecule 1	Ceacam1	3	71276000	82001000	66239000	51027000	73361000	72586000	64234000	64384000	56648000	62393000	72652000	64784000	70746000	67134000	69240000	68164000
Q3TG45	26S proteasome non-ATPase regulatory subunit 8	Psmd8	3	37007000	46092000	45173000	44869000	41920000	42807000	42431000	52403000	48217000	46620000	41838000	37692000	45017000	42514000	49406000	46829000
Q3TGF2	Protein FAM107B	Fam107b	3	14607000	15277000	16947000	13539000	18014000	14993000	16039000	15346000	13406000	14591000	21344000	17608000	14642000	16357000	20089000	12893000
Q3THM8	Emerin	Emd	3	3785400	4925000	4241000	4615800	4757600	6219100	4720000	4706600	4922500	5017200	4757500	6041200	4043800	4305800	3902700	6250400
Q3TIR6	Prefoldin subunit 3	Vbp1	3	35074000	27443000	25548000	36349000	23185000	29625000	28028000	37512000	28662000	23801000	22860000	27411000	27980000	29229000	29748000	37270000
Q3TJ22	Angio-associated migratory protein	Aamp	3	5158800	4467200	4903200	6284800	5545200	7842800	6552700	6095100	5026100	6283300	6078900	6288200	7380500	7308200	8031000	6854400
Q3TM89	PEST proteolytic signal-containing nuclear protein	Pcnp	3	15383000	16757000	13388000	12448000	15000000	14533000	11878000	12036000	12984000	11036000	18909000	13315000	10659000	11942000	14892000	14548000
Q3TW96	UDP-N-acetylhexosamine pyrophosphorylase-like protein 1	Uap1l1	3	15671000	12095000	10928000	13303000	9766800	14411000	8254000	12205000	10245000	9621600	8975900	11308000	9507700	9951000	9956500	17677000
Q3TYL7	DnaJ homolog subfamily B member 1	Dnajb1	3	1762700	2378000	3639300	2409500	2966800	2250200	4208000	2619700	2625000	2440000	3303600	3526500	3488500	2305000	3590000	3677400
Q3TYX3	SET and MYND domain-containing protein 5	Smyd5	3	11002000	10543000	8826500	763642	18136000	12288000	9118200	11101000	10197000	841786	11324000	13522000	11488000	9140800	9980500	15621000
Q3U741	Probable ATP-dependent RNA helicase DDX17	Ddx17	3	12032000	11400000	11095000	11843000	10839000	13641000	16339000	11816000	14716000	14699000	11859000	11868000	11248000	12512000	12181000	13651000
Q3UDC3	Target of Myb protein 1	Tom1	3	7372600	6327900	9743300	7265400	7763700	7652400	8139100	7767000	6701400	8495800	6511100	9100600	8537500	7064300	5429700	8422300
Q3UDE2	Tubulin--tyrosine ligase-like protein 12	Ttll12	3	12233000	822315	7355100	8233300	788762	8487600	11443000	809263	6657200	9905500	845111	9935900	11102000	8359600	10019000	10427000
Q3UEB3-3	Poly(U)-binding-splicing factor PUF60	Puf60	3	8539500	10381000	10534000	9561400	788762	7644400	10772000	8501300	9067000	10122000	8124800	9045200	10632000	8352800	10191000	12216000
Q3UGB5	DAZ-associated protein 1	Dazap1	3	23670000	27724000	28079000	17854000	29477000	25574000	26342000	26640000	26476000	28637000	22835000	25880000	29712000	25329000	25162000	23427000
Q3UMU9-4	Hepatoma-derived growth factor-related protein 2;Hepatoma-derived growth factor-related protein 3	Hdgfrp2;Hdgfrp3	3	13659000	6622400	8387000	8681400	8249700	11274000	6603200	13562000	8071700	11092000	11016000	10830000	12525000	8405300	10051000	12499000
Q3UNX5	Acyl-coenzyme A synthetase ACSM3, mitochondrial	Acsm3	3	893126	822315	6533200	763642	5943900	997042	8179600	809263	7082600	6864100	845111	6895700	6569000	9324500	649718	752936
Q3UUI3	Acyl-coenzyme A thioesterase THEM4	Them4	3	41504000	27821000	22847000	28171000	35843000	36653000	27648000	34265000	25057000	21854000	19813000	34331000	29522000	25266000	40629000	48665000
Q3V1K7	Solute carrier organic anion transporter family member 2B1	Slco2b1	3	4530200	4662300	4238400	2961000	4080000	2809200	6609500	2328400	4089300	6211700	4277200	3724200	2774100	3024300	4225800	2777600
Q45VK5	Interleukin enhancer-binding factor 3	Ilf3	3	1928700	822315	1935900	763642	1841800	997042	865364	809263	1825600	841786	1455300	1176600	780402	1575400	1999500	1618400
Q504N0	Carboxypeptidase A2	Cpa2	3	4709500	822315	809843	763642	788762	2040000	865364	809263	729584	841786	845111	766673	780402	2493900	649718	752936
Q5BKQ4	Inactive pancreatic lipase-related protein 1	Pnliprp1	3	19240000	822315	809843	763642	788762	2418800	865364	809263	729584	2141500	845111	766673	3158200	5824200	649718	752936
Q5M9M1	Hepcidin-2;Hepcidin	Hamp2;Hamp	3	23108000	10149000	23812000	19948000	13644000	22103000	13822000	13913000	21154000	16149000	16576000	18261000	15684000	10139000	15915000	12673000
Q5RL20	39S ribosomal protein L43, mitochondrial	Mrpl43	3	249140000	189210000	174400000	193330000	202800000	171980000	238330000	126950000	271990000	196640000	278070000	133720000	188260000	172160000	136330000	187060000
Q5SW88	RAB1A, member RAS oncogene family	Rab1	3	259070000	373090000	323240000	349280000	415120000	387330000	301960000	413320000	289510000	330500000	311420000	382070000	423130000	295560000	420470000	432880000
Q61160	FAS-associated death domain protein	Fadd	3	11821000	16932000	13173000	12508000	12465000	13485000	10202000	10831000	12615000	12835000	12312000	14568000	12734000	11411000	12256000	18510000
Q61239	Protein farnesyltransferase/geranylgeranyltransferase type-1 subunit alpha	Fnta	3	2260300	3405100	3841800	3297400	3092500	2196200	3468800	2947700	3631300	3934100	2314700	4297100	4127700	3972900	2200500	2733400
Q61696	Heat shock 70 kDa protein 1A;Heat shock 70 kDa protein 1B	Hspa1a;Hspa1b	3	893126	5862800	7549500	10389000	12210000	12777000	7643000	10115000	9051700	5838400	7589600	12092000	13322000	7719200	10226000	13054000
Q61733	28S ribosomal protein S31, mitochondrial	Mrps31	3	3280600	3683600	3932600	3346300	2463200	3485800	4483500	3892700	4037600	3399700	2745500	3368700	3636600	3670700	3570100	4205500
Q62093	Serine/arginine-rich splicing factor 2	Srsf2	3	145390000	118020000	120310000	119460000	138790000	174180000	116470000	138360000	114700000	117180000	138210000	138180000	131070000	133320000	133280000	157270000
Q63739	Protein tyrosine phosphatase type IVA 1	Ptp4a1	3	5861700	6745900	4424100	5798400	7437700	7786800	6999500	5411700	5116500	6604400	10427000	7388100	10087000	5547800	5735500	10969000
Q63810-2	Calcineurin subunit B type 1	Ppp3r1	3	9951000	6245000	3737000	3991100	7020200	997042	5645900	4810500	7329500	5725400	6951700	5904800	4553600	878568	7425700	7570600
Q63829	COMM domain-containing protein 3	Commd3	3	5295500	7253000	7596400	7373100	6938400	7491000	6427600	6905400	6409000	8212100	7477700	8830600	7458900	6002000	7992100	8591600
Q64378	Peptidyl-prolyl cis-trans isomerase FKBP5;Peptidyl-prolyl cis-trans isomerase FKBP5, N-terminally processed	Fkbp5	3	5884600	4093700	9539800	5014000	4684800	6584700	17321000	8939900	5029700	5301200	9709300	4668300	6792300	10589000	6794500	4005400
Q64737-2	Trifunctional purine biosynthetic protein adenosine-3;Phosphoribosylamine--glycine ligase;Phosphoribosylformylglycinamidine cyclo-ligase;Phosphoribosylglycinamide formyltransferase	Gart	3	5406200	7118200	7334300	8250700	7717900	4711600	8881600	7105600	7557200	841786	7669800	5848000	5551000	4432000	9939400	9991000
Q6DYE8	Ectonucleotide pyrophosphatase/phosphodiesterase family member 3;Alkaline phosphodiesterase I;Nucleotide pyrophosphatase	Enpp3	3	13904000	9829400	9071600	9015200	7838400	15889000	7397300	809263	8544800	841786	7205200	10004000	10079000	8227500	9819000	11314000
Q6P4T2	U5 small nuclear ribonucleoprotein 200 kDa helicase	Snrnp200	3	893126	30646000	809843	763642	21726000	18570000	22720000	26183000	26888000	27831000	24235000	24533000	23092000	878568	649718	752936
Q6PGH2	Hematological and neurological expressed 1-like protein	Hn1l	3	14347000	8253400	15517000	11866000	11344000	997042	12306000	11292000	10783000	10903000	16708000	12503000	9715000	11838000	16619000	16047000
Q6ZQ38	Cullin-associated NEDD8-dissociated protein 1	Cand1	3	1826400	2543900	809843	2593800	2102400	997042	7436100	809263	729584	2031900	2174900	766673	1949500	878568	2420000	2317300
Q6ZWV7	60S ribosomal protein L35	Rpl35	3	89031000	60550000	49771000	51728000	67838000	55325000	54456000	40740000	41760000	48537000	43001000	49082000	58554000	43558000	77910000	57427000
Q7TN29-2	Stromal membrane-associated protein 2	Smap2	3	14287000	17713000	16050000	15026000	23177000	16304000	14168000	15573000	20613000	16111000	16003000	13358000	18752000	15909000	20154000	10798000
Q7TNE3	Sperm-associated antigen 7	Spag7	3	3705900	3030600	3064900	3122300	3298800	3791000	3478700	3425500	3223000	2684800	4500100	4149400	2700000	3297900	3641200	4822900
Q80SX0	StAR-related lipid transfer protein 4	Stard4	3	893126	3003400	809843	4489300	788762	997042	865364	809263	3852100	841786	845111	766673	780402	878568	649718	752936
Q80UY2	E3 ubiquitin-protein ligase KCMF1	Kcmf1	3	3484300	3048000	4395900	3940800	3293400	4144000	4404500	3455900	3444700	3468600	4145700	4570000	3762200	3251800	2965200	4209500
Q80VJ2	Steroid receptor RNA activator 1	Sra1	3	13900000	11382000	14572000	12405000	23910000	13188000	13986000	14115000	9311700	11947000	14957000	18364000	10779000	13619000	16104000	16866000
Q80W54	CAAX prenyl protease 1 homolog	Zmpste24	3	21707000	18153000	19261000	16665000	18896000	17357000	16083000	17559000	13392000	21712000	16494000	20088000	16588000	14624000	14771000	10319000
Q80X81	Acetyl-Coenzyme A acetyltransferase 3	Acat3	3	1779500000	1488100000	1416100000	1459800000	1191800000	1517600000	1122400000	1511000000	1589700000	1202600000	1386400000	1470200000	1336600000	1186800000	1272500000	1519200000
Q80Y55	BSD domain-containing protein 1	Bsdc1	3	893126	10744000	6704500	7706000	6865900	7814100	12839000	11262000	7918100	8441100	8168900	11551000	10482000	8449900	7654400	9101800
Q80ZS3	28S ribosomal protein S26, mitochondrial	Mrps26	3	17021000	21894000	16833000	14209000	15440000	21057000	17845000	16305000	16870000	15952000	18860000	18235000	22149000	18426000	19320000	25577000
Q8BFY6	Peflin	Pef1	3	8094200	10427000	10361000	10814000	11429000	10927000	8207300	10417000	8695500	11102000	9005600	9540300	11032000	7633800	9218600	10040000
Q8BGN3	Ectonucleotide pyrophosphatase/phosphodiesterase family member 6	Enpp6	3	893126	4066200	3888700	6940000	8477300	4541200	6874100	6570000	7447100	7777000	7441300	766673	7052700	6916900	6602700	6147600
Q8BGS2	BolA-like protein 2	Bola2	3	24841000	21478000	20395000	24098000	19767000	23825000	18294000	23567000	21020000	19922000	18966000	22994000	20231000	17693000	17886000	30023000
Q8BJW6-2	Eukaryotic translation initiation factor 2A;Eukaryotic translation initiation factor 2A, N-terminally processed	Eif2a	3	5697600	5699900	5842500	3404800	4137800	4789700	4621700	3445400	3973300	3731900	7101200	3636900	6116300	5914100	4690200	4032800
Q8BM88	Cathepsin O	Ctso	3	9878200	13393000	11027000	5846600	9455400	8542200	7883600	9295300	10648000	13614000	10083000	11570000	10075000	11692000	8850000	8530700
Q8BQ47	Protein canopy homolog 4	Cnpy4	3	12814000	15803000	12942000	18576000	12116000	19384000	14854000	13482000	12455000	13328000	15868000	17360000	12858000	20086000	16939000	29061000
Q8BSE0	Regulator of microtubule dynamics protein 2	Rmdn2	3	11840000	28989000	25182000	24140000	22122000	11042000	24593000	15940000	16918000	32209000	13089000	12064000	14122000	17262000	26966000	13845000
Q8BTI8-3	Serine/arginine repetitive matrix protein 2	Srrm2	3	13879000	9600200	10940000	10201000	15559000	15115000	13349000	10770000	9943900	10018000	13349000	10051000	11234000	10842000	11184000	9140600
Q8BTJ4-2	Bis(5-adenosyl)-triphosphatase enpp4	Enpp4	3	12170000	15614000	10385000	12238000	13454000	17946000	10269000	16131000	12197000	14455000	15335000	14869000	16746000	15976000	14608000	21924000
Q8BVQ9	26S protease regulatory subunit 7	Psmc2	3	6606900	8335000	10864000	13058000	7326100	6277000	16556000	7279400	7982100	7329400	9053400	7834300	8451400	10035000	9912100	8933000
Q8BWW3	Phosphoacetylglucosamine mutase	Pgm3	3	18645000	12292000	13377000	12263000	13348000	20797000	865364	20044000	10592000	10778000	12755000	13838000	25705000	17571000	27470000	25315000
Q8C7E4	Ribonuclease 4	Rnase4	3	28505000	21089000	22428000	18218000	27517000	22700000	14283000	24461000	19828000	17068000	29001000	24487000	26917000	19671000	25064000	22788000
Q8C7I4	Apolipoprotein L 9b	Apol9b	3	19828000	5753200	7319900	10523000	788762	11389000	865364	9524100	9321600	7601900	8851300	766673	7027700	3122300	11826000	11475000
Q8CAK3	UPF0515 protein C19orf66 homolog		3	1511000	1450300	1231400	1336900	1321000	1518900	1118200	1110700	1297300	1193900	1570700	1296400	1301400	1347600	1396800	1640900
Q8CC88-2	von Willebrand factor A domain-containing protein 8	Vwa8	3	893126	822315	809843	3450700	2659100	997042	13536000	2862700	729584	6784200	845111	766673	4226700	3003600	2888700	752936
[truncated: 504 more rows]

## Sheet: Significant different proteins
																				FWrn 10 m / FWT 10 m						FWrn 4m / FWT 4 m						FWT 4 m / FWT 10 m						FWrn 4 m / FWrn 10 m						FWrn 4 m / FWT 10 m
[truncated: 73 more rows]
[truncated: 6 more columns]
