# Supplementary material for: Integrated liver and serum proteomics uncover sexual dimorphism and alteration of several immune response proteins in an aging Werner syndrome mouse model
Source: Aging (Albany NY). 2024 May 24;16(10):8417–45. doi: 10.18632/aging.205866 (PMC11164518; doi:10.18632/aging.205866)
Supplement: Supplementary Table 5 [file aging-16-205866-s006.xls]

## Sheet: Column headers
Supplementary Table 5. List of quantified liver proteins significantly different in at least one of the comparisons between the various male groups.
Column header	Description
Accession	UniProt accession number of the leading razor protein
Protein.names	Protein name
Gene.names	Gene name
Razor...unique.peptides	Number of unique and razor peptides
MWrn10m_2970	LFQ intensities, normalized and imputed.
MWrn10m_2971
MWrn10m_2972
MWrn10m_2973
MWrn4m_3026
MWrn4m_3029
MWrn4m_3123
MWrn4m_3124
MWT10m_3048
MWT10m_3049
MWT10m_3051
MWT10m_3052
MWT4m_3000
MWT4m_3001
MWT4m_3014
MWT4m_3017
mean_g1	Mean of intensities for group g1
mean_g2	Mean of intensities for group g2
Ratio_g1g2	Ratio is computed as mean of group g1 / mean of group g2
log2Ratio	Log2 of the ratio between group g1 and group g2
Foldchange	The fold change is computed as ratio when ratio >0 or 1/ratio when ratio <0
Log2Foldchange	Log2 of the fold change between group g1 and group g2
zscore	zscore = x - µ / σ, where x = log2(ratio), µ = average of all log2(ratio) et σ = standard deviation of all log2(ratio)
pval_Limma	p-value from Limma

## Sheet: Quantified proteins in males
Accession	ProteinNames	GeneNames	RazorUniquePeptides	MWrn10m_2970	MWrn10m_2971	MWrn10m_2972	MWrn10m_2973	MWrn4m_3026	MWrn4m_3029	MWrn4m_3123	MWrn4m_3124	MWT10m_3048	MWT10m_3049	MWT10m_3051	MWT10m_3052	MWT4m_3000	MWT4m_3001	MWT4m_3014	MWT4m_3017
P19096	Fatty acid synthase;[Acyl-carrier-protein] S-acetyltransferase;[Acyl-carrier-protein] S-malonyltransferase;3-oxoacyl-[acyl-carrier-protein] synthase;3-oxoacyl-[acyl-carrier-protein] reductase;3-hydroxyacyl-[acyl-carrier-protein] dehydratase;Enoyl-[acyl-carrier-protein] reductase;Oleoyl-[acyl-carrier-protein] hydrolase	Fasn	98	3244200	112990000	7248900	90646000	917050	6799800	9408900	3428100	3800100	2161400	3375400	1521000	76546000	6722800	14565000	5646100
Q8C196	Carbamoyl-phosphate synthase [ammonia], mitochondrial	Cps1	96	138460000	2221800000	163030000	1934900000	179060000	319130000	507370000	183770000	540530000	325240000	252950000	196190000	2180700000	431600000	455590000	187910000
P16546-2	Spectrin alpha chain, non-erythrocytic 1	Sptan1	73	21002000	20676000	18875000	19735000	17158000	22757000	22960000	20019000	21330000	20016000	21127000	18795000	20747000	21819000	23302000	22228000
F8VPN4	Glycogen debranching enzyme	Agl	66	61543000	36688000	77689000	41346000	34141000	45143000	33341000	41622000	22679000	57243000	67604000	46378000	25827000	30975000	38784000	34140000
Q8R0Y6	Cytosolic 10-formyltetrahydrofolate dehydrogenase	Aldh1l1	62	699710000	483020000	637400000	467030000	667490000	633680000	634650000	921220000	497900000	621580000	710240000	506920000	523980000	641310000	689700000	680240000
Q68FD5	Clathrin heavy chain 1;Clathrin heavy chain	Cltc	60	383910	74141000	306800	55986000	128820	1547700	1794400	283490	2528200	376440	622930	356800	56665000	1599700	3154600	317490
G3X982	Aldehyde oxidase 3	Aox3	58	278860000	155140000	241880000	147880000	325060000	229470000	318690000	387130000	235880000	312100000	302920000	327100000	185460000	317750000	261850000	274890000
P01027	Complement C3;Complement C3 beta chain;C3-beta-c;Complement C3 alpha chain;C3a anaphylatoxin;Acylation stimulating protein;Complement C3b alpha chain;Complement C3c alpha chain fragment 1;Complement C3dg fragment;Complement C3g fragment;Complement C3d fragment;Complement C3f fragment;Complement C3c alpha chain fragment 2	C3	55	12938000	26184000	13610000	30971000	11110000	14963000	16611000	8763100	21410000	19902000	14033000	14230000	23109000	17573000	14426000	11318000
Q9DBT9	Dimethylglycine dehydrogenase, mitochondrial	Dmgdh	48	102090000	151320000	152820000	144170000	131120000	121830000	168680000	81390000	149000000	162190000	192150000	131380000	151840000	163660000	152380000	155400000
Q60597	2-oxoglutarate dehydrogenase, mitochondrial	Ogdh	47	69596000	39926000	60988000	42433000	66753000	65722000	61701000	65742000	62535000	61748000	61465000	63817000	39632000	67137000	66501000	69124000
Q8CHR6	Dihydropyrimidine dehydrogenase [NADP(+)]	Dpyd	47	88806000	46217000	80243000	45338000	81244000	67491000	60255000	94895000	58915000	81197000	74825000	76682000	49846000	53774000	74409000	68876000
G5E8R3	Pyruvate carboxylase;Pyruvate carboxylase, mitochondrial	Pcx;Pc	47	18313000	203600000	27109000	177760000	14882000	24142000	38353000	14408000	43262000	19604000	24441000	19586000	153070000	32179000	33501000	14152000
Q3UQ44	Ras GTPase-activating-like protein IQGAP2	Iqgap2	47	36265	42225000	67368	33140000	130120	161250	272970	102690	602650	95100	36381	126080	43884000	179580	1113900	29922
P58252	Elongation factor 2	Eef2	46	107470000	114640000	129040000	126950000	109230000	116560000	138820000	101850000	143390000	145850000	140590000	140600000	123280000	129710000	132060000	134880000
Q80X90	Filamin-B	Flnb	46	11431000	24908000	11435000	21916000	4993500	12945000	12265000	8176600	13029000	11876000	10956000	9752200	23631000	12227000	12659000	10869000
Q9ET01	Glycogen phosphorylase, liver form;Alpha-1,4 glucan phosphorylase	Pygl	46	185210000	140260000	235480000	155040000	170100000	176190000	155000000	162450000	93427000	133950000	185410000	157290000	139890000	127620000	183820000	185120000
Q9R0H0	Peroxisomal acyl-coenzyme A oxidase 1	Acox1	46	394070000	342500000	599900000	458710000	429030000	434180000	488410000	366280000	315700000	409250000	510760000	346770000	368010000	433260000	552220000	552110000
Q99LB7	Sarcosine dehydrogenase, mitochondrial	Sardh	45	96862000	162870000	131560000	162320000	86836000	124380000	150750000	93467000	140170000	123580000	162540000	101910000	149650000	125640000	119270000	121330000
G3X8P9	Aldehyde oxidase 1	Aox1	44	35285000	16622000	34326000	19415000	28892000	24430000	20215000	28456000	15154000	17459000	21044000	19918000	16236000	24111000	23338000	25928000
O08601	Microsomal triglyceride transfer protein large subunit	Mttp	44	294630000	171610000	349450000	187400000	311800000	276970000	242160000	301200000	219620000	223530000	237030000	290760000	163450000	249530000	243260000	284850000
P57780	Alpha-actinin-4	Actn4	43	53868000	42173000	53938000	40426000	45692000	56369000	41186000	45666000	32331000	42842000	52311000	45993000	62679000	46040000	49309000	53453000
P28271	Cytoplasmic aconitate hydratase	Aco1	43	128590000	125830000	106710000	119500000	146350000	108680000	141830000	130550000	129490000	112230000	128470000	109320000	131520000	153300000	150160000	132300000
Q8BHN3-2	Neutral alpha-glucosidase AB	Ganab	42	104320000	59497000	91502000	64065000	113810000	95507000	98439000	111270000	109720000	110890000	88694000	115180000	62268000	101650000	94892000	96371000
Q78PY7	Staphylococcal nuclease domain-containing protein 1	Snd1	42	32126000	42283000	41852000	41762000	30380000	34311000	51897000	32406000	57551000	46461000	48750000	51248000	45609000	42752000	35721000	40272000
Q01853	Transitional endoplasmic reticulum ATPase	Vcp	42	220810000	121370000	194910000	132610000	236480000	198160000	189050000	217240000	152210000	182330000	178700000	167560000	123540000	182560000	193670000	194950000
Q61838	Alpha-2-macroglobulin;Alpha-2-macroglobulin 165 kDa subunit;Alpha-2-macroglobulin 35 kDa subunit	A2m	41	17870000	43699000	17652000	41153000	15330000	25397000	24077000	15565000	23708000	24447000	16990000	18714000	43244000	20964000	17894000	16897000
P40142	Transketolase	Tkt	41	551250000	272810000	578370000	283340000	527600000	442900000	359570000	489910000	334760000	343360000	428570000	446780000	231050000	465120000	422640000	486840000
Q3V117	ATP-citrate synthase	Acly	40	13617000	48800000	14286000	39484000	10506000	11133000	15291000	20507000	6608500	13506000	11450000	6594900	39885000	14312000	17655000	11570000
P28665	Murinoglobulin-1	Mug1	40	15328000	37587000	17846000	30405000	19222000	26376000	33860000	15692000	46337000	34288000	24537000	31236000	45287000	31907000	18911000	19878000
Q9JHU4	Cytoplasmic dynein 1 heavy chain 1	Dync1h1	39	103804	2748300	67047.2	22003000	157966	452120	124630	147941	503750	450730	314930	420060	12896000	286120	113190	456410
Q91W43	Glycine dehydrogenase (decarboxylating), mitochondrial	Gldc	39	54238000	37133000	53760000	37468000	59512000	48301000	48705000	56310000	43153000	55012000	48347000	41893000	29281000	50733000	47486000	49650000
P08113	Endoplasmin	Hsp90b1	38	31004000	140900000	50675000	136430000	30139000	55326000	92246000	33120000	127530000	85342000	53536000	58414000	152720000	82892000	63605000	50798000
Q6PB66	Leucine-rich PPR motif-containing protein, mitochondrial	Lrpprc	38	188560	19299000	244590	17284000	264260	447000	927880	222490	792570	643370	300180	180760	19008000	648500	584790	190800
Q8VDD5	Myosin-9	Myh9	38	10987000	20300000	7989400	15655000	1718500	14611000	13276000	6539900	9940400	9387000	8686000	7129100	23899000	13207000	19110000	12142000
Q921I1	Serotransferrin	Tf	38	284720000	121290000	230610000	139460000	263830000	240540000	180830000	299790000	303260000	273610000	217880000	277730000	119900000	174880000	195070000	209370000
P07724	Serum albumin	Alb	38	2212200000	1174800000	2726300000	1352800000	3044400000	2222800000	1465900000	2645900000	1901200000	2649900000	2250000000	1962000000	868010000	1766900000	1067300000	1949300000
P14824	Annexin A6;Annexin	Anxa6	37	138090000	67802000	120280000	68196000	108880000	114600000	109940000	126970000	72275000	68826000	89444000	91195000	61478000	120540000	129010000	83219000
Q9DBM2	Peroxisomal bifunctional enzyme;Enoyl-CoA hydratase/3,2-trans-enoyl-CoA isomerase;3-hydroxyacyl-CoA dehydrogenase	Ehhadh	37	17728000	164250000	25997000	146670000	14903000	21658000	32693000	26435000	15323000	17996000	17517000	12185000	115870000	25335000	31936000	13981000
A0A0R4J0I9	Prolow-density lipoprotein receptor-related protein 1;Low-density lipoprotein receptor-related protein 1 85 kDa subunit;Low-density lipoprotein receptor-related protein 1 515 kDa subunit;Low-density lipoprotein receptor-related protein 1 intracellular domain	Lrp1	37	5101200	10136000	8439300	11825000	6351400	8975000	11815000	4601700	12327000	9979300	8068900	8720100	10107000	10198000	7989100	8398400
A2AVJ7	Ribosome-binding protein 1	Rrbp1	37	38550000	33926000	37542000	36275000	31911000	42998000	39267000	35750000	48405000	41937000	43335000	48504000	28783000	21801000	32892000	35030000
Q00519	Xanthine dehydrogenase/oxidase;Xanthine dehydrogenase;Xanthine oxidase	Xdh	37	78477000	46108000	86009000	46829000	87515000	71753000	68505000	90739000	54722000	74597000	76638000	74308000	46505000	74092000	68499000	66879000
A0A0R4J135	Methanethiol oxidase	Selenbp2	37	423240000	207220000	388290000	210460000	718040000	398350000	807330000	756580000	1268000000	917190000	603560000	1391300000	342870000	376790000	480420000	524430000
P63038	60 kDa heat shock protein, mitochondrial	Hspd1	36	173660000	317470000	226230000	297990000	131470000	200600000	218650000	164130000	208390000	203430000	172790000	158280000	320680000	213050000	202480000	174890000
Q91XD4	Formimidoyltransferase-cyclodeaminase;Glutamate formimidoyltransferase;Formimidoyltetrahydrofolate cyclodeaminase	Ftcd	36	312790000	196780000	343430000	200880000	351340000	275920000	291720000	363180000	202290000	256120000	257340000	210590000	174020000	307810000	292320000	284850000
Q91VD9	NADH-ubiquinone oxidoreductase 75 kDa subunit, mitochondrial	Ndufs1	36	74097000	52478000	71414000	50178000	45285000	82175000	72288000	56026000	51112000	28625000	53781000	47754000	35600000	48592000	99103000	113220000
E9Q509	Pyruvate kinase;Pyruvate kinase PKLR	Pklr	36	542550000	303590000	561560000	280610000	431080000	341910000	314970000	423610000	188410000	125440000	305020000	289090000	244040000	364170000	424800000	465880000
P26043	Radixin	Rdx	36	199210000	96394000	167680000	102660000	218360000	200770000	159100000	224970000	177490000	182430000	199510000	212000000	105680000	155200000	166860000	193980000
Q8BMS1	Trifunctional enzyme subunit alpha, mitochondrial;Long-chain enoyl-CoA hydratase;Long chain 3-hydroxyacyl-CoA dehydrogenase	Hadha	36	138740000	211500000	141910000	206310000	156720000	121420000	187550000	110760000	152560000	134360000	162450000	127950000	206290000	196320000	168330000	149860000
P20029	78 kDa glucose-regulated protein	Hspa5	35	587080000	407460000	505330000	433990000	628480000	585340000	647870000	634070000	863950000	731600000	568810000	831930000	458590000	554900000	593860000	576180000
O35945	Aldehyde dehydrogenase, cytosolic 1	Aldh1a7	35	1995200000	1110800000	1854800000	1189600000	1520200000	1448900000	1173300000	1701800000	865290000	716260000	1249900000	1000400000	976730000	1070600000	1557600000	1425300000
P24270	Catalase	Cat	35	2766800000	1322200000	2305400000	1538800000	2670800000	2499900000	2248600000	3211700000	1757600000	2055900000	2682700000	2237700000	1465800000	2039900000	2565500000	2909000000
P50544	Very long-chain specific acyl-CoA dehydrogenase, mitochondrial	Acadvl	35	15380000	89152000	17716000	79838000	17806000	23536000	33840000	15217000	41368000	24662000	21542000	21130000	76204000	36800000	27583000	24536000
Q64727	Vinculin	Vcl	35	35330000	23955000	24320000	24325000	40860000	29859000	35216000	35392000	36369000	34321000	33687000	33576000	27073000	32758000	40011000	37822000
Q8K010	5-oxoprolinase	Oplah	34	13581000	18173000	15002000	17457000	10249000	13717000	16620000	12658000	13175000	10727000	13159000	11405000	17844000	15688000	14993000	14210000
Q99KI0	Aconitate hydratase, mitochondrial	Aco2	34	193990000	188690000	227050000	194740000	223360000	204590000	235910000	167340000	275710000	236690000	267120000	206260000	192750000	240370000	205850000	225610000
P34914	Bifunctional epoxide hydrolase 2;Cytosolic epoxide hydrolase 2;Lipid-phosphate phosphatase	Ephx2	34	253910000	274550000	249220000	270100000	293450000	205260000	281720000	288640000	177090000	185250000	230070000	191920000	288070000	287670000	252450000	268310000
Q8VCT4	Carboxylesterase 1D	Ces1d	34	1674000000	935600000	1786300000	955390000	1357700000	1446900000	1057800000	1279200000	840290000	864490000	1175900000	934360000	810430000	1491400000	1378900000	1354200000
A2AQR0	Glycerol-3-phosphate dehydrogenase;Glycerol-3-phosphate dehydrogenase, mitochondrial	Gpd2	34	59684000	43611000	72870000	45824000	49705000	56824000	53701000	41259000	41433000	27486000	47814000	49834000	40454000	48735000	58183000	60277000
Q9D0F9	Phosphoglucomutase-1	Pgm1;Pgm2	34	410370000	187390000	365540000	215530000	422060000	353500000	290520000	423280000	278120000	319660000	362030000	349750000	223050000	311600000	364570000	387720000
Q99K67	Alpha-aminoadipic semialdehyde synthase, mitochondrial;Lysine ketoglutarate reductase;Saccharopine dehydrogenase	Aass	33	549920	49591000	1146600	43528000	827950	2042200	3424300	1151900	3145200	1877000	1321000	1076900	44591000	2853200	3721900	802160
P11499	Heat shock protein HSP 90-beta	Hsp90ab1	33	28668000	216220000	46121000	191140000	24861000	54616000	60620000	29284000	70907000	54036000	39048000	40137000	216970000	69657000	56399000	45955000
D3Z041	Long-chain-fatty-acid--CoA ligase 1	Acsl1	33	88257000	349170000	101830000	303460000	66101000	99807000	117060000	56593000	91759000	81387000	85324000	68252000	322400000	125100000	103830000	88005000
P51660	Peroxisomal multifunctional enzyme type 2;(3R)-hydroxyacyl-CoA dehydrogenase;Enoyl-CoA hydratase 2	Hsd17b4	33	137820000	145430000	160660000	157100000	103750000	125650000	110430000	96155000	95401000	105900000	127040000	100000000	138700000	117790000	138680000	141330000
P09411	Phosphoglycerate kinase 1;Phosphoglycerate kinase	Pgk1	33	862410000	413700000	733530000	448710000	975860000	657820000	557850000	945070000	555790000	686190000	628130000	706950000	427150000	630990000	702950000	770920000
Q61233	Plastin-2	Lcp1	33	37451000	43949000	43532000	42148000	39627000	41807000	53928000	36471000	45273000	52934000	44715000	36445000	44343000	52068000	40263000	39518000
P27773	Protein disulfide-isomerase A3	Pdia3	33	235800000	138800000	224070000	150050000	233690000	193150000	231070000	248030000	227920000	248390000	191470000	247600000	156540000	231510000	194030000	218410000
D3YZ54	2-hydroxyacyl-CoA lyase 1	Hacl1	32	275130000	134030000	313120000	158160000	258570000	207010000	183710000	286370000	136250000	190640000	217620000	170450000	126690000	239010000	219650000	226720000
P05202	Aspartate aminotransferase, mitochondrial	Got2	32	1837200000	1094200000	1906600000	1157300000	2312600000	1908200000	1465200000	1864200000	1692600000	1932800000	1985900000	2108300000	990380000	1671500000	1646000000	1965400000
P52825	Carnitine O-palmitoyltransferase 2, mitochondrial	Cpt2	32	240730000	118510000	211330000	130110000	221580000	183030000	148350000	197350000	137610000	150330000	197830000	170750000	113510000	175760000	163770000	185690000
P26443	Glutamate dehydrogenase 1, mitochondrial	Glud1	32	425210000	506250000	414520000	482750000	353540000	481370000	357880000	389400000	389330000	277210000	325480000	299640000	484830000	341770000	386780000	317420000
Q9JKR6	Hypoxia up-regulated protein 1	Hyou1	32	9142500	21135000	9004200	21437000	10842000	9789600	15714000	9741200	23078000	15020000	12307000	16282000	24030000	14860000	12650000	10366000
F6RPJ9	Insulin-degrading enzyme	Ide	32	28633000	15002000	28160000	16241000	33935000	25794000	25518000	31347000	25037000	24715000	25870000	28144000	17690000	24645000	28018000	28576000
Q3ULD5	Methylcrotonoyl-CoA carboxylase beta chain, mitochondrial	Mccc2	32	86019000	43232000	80271000	46455000	89049000	79607000	63523000	85868000	60338000	78037000	83426000	74597000	45362000	69298000	68662000	71606000
Q9Z2V4	Phosphoenolpyruvate carboxykinase, cytosolic [GTP]	Pck1	32	36932000	58474000	36516000	48582000	60796000	36742000	51683000	56081000	72228000	109730000	71462000	79344000	61981000	57778000	40668000	46574000
Q99J08	SEC14-like protein 2	Sec14l2	32	234340000	129140000	239100000	131460000	258100000	181240000	162080000	260250000	142560000	170920000	193870000	187970000	135770000	210660000	169870000	207000000
Q9CZN7-2	Serine hydroxymethyltransferase	Shmt2	32	242240000	183260000	319050000	194160000	394780000	302640000	328090000	306300000	298330000	284690000	340600000	338690000	179730000	313190000	312160000	319050000
P50247	Adenosylhomocysteinase	Ahcy	31	1525800000	730960000	1340200000	855050000	2060600000	1570400000	1551500000	1990300000	1376600000	1486700000	1700800000	1449100000	921970000	1650200000	1590400000	1763200000
P47738	Aldehyde dehydrogenase, mitochondrial	Aldh2	31	959160000	1036600000	1143600000	1054400000	854980000	951960000	1040600000	794840000	803100000	830270000	957130000	603200000	1001300000	1065400000	952830000	749380000
Q922D8	C-1-tetrahydrofolate synthase, cytoplasmic;Methylenetetrahydrofolate dehydrogenase;Methenyltetrahydrofolate cyclohydrolase;Formyltetrahydrofolate synthetase;C-1-tetrahydrofolate synthase, cytoplasmic, N-terminally processed	Mthfd1	31	5496200	65720000	8832100	57718000	5501600	10931000	18026000	5942200	18171000	10037000	10580000	6521400	59836000	18789000	15670000	9963600
Q9CPY7	Cytosol aminopeptidase	Lap3	31	367990000	172990000	315940000	194520000	446320000	341990000	301240000	426510000	278080000	362340000	355020000	361170000	192230000	333150000	348290000	385180000
P06801	NADP-dependent malic enzyme;Malic enzyme	Me1	31	342410000	199090000	356850000	215870000	219590000	172450000	160630000	225810000	48284000	59821000	121710000	74240000	184970000	165890000	309380000	285790000
P80314	T-complex protein 1 subunit beta	Cct2	31	42894000	40678000	51213000	43106000	38957000	51439000	55880000	35595000	48779000	46377000	50180000	40735000	48136000	58638000	53896000	47006000
Q02053	Ubiquitin-like modifier-activating enzyme 1	Uba1	31	9684400	23827000	10292000	23525000	8770500	10124000	14639000	10950000	13822000	11281000	11596000	8757400	25657000	16623000	12023000	11013000
Q8VDJ3	Vigilin	Hdlbp	31	6698600	54465000	11888000	45885000	7705700	8856200	14165000	6382800	14892000	10412000	7183200	11302000	41534000	10560000	9467300	6733600
P61922	4-aminobutyrate aminotransferase, mitochondrial	Abat	30	61753000	89833000	77116000	90135000	69324000	73778000	128290000	66972000	106620000	97602000	101370000	59904000	101560000	113280000	88054000	91602000
E9Q1Y3	Apolipoprotein B-100;Apolipoprotein B-48	Apob	30	694880	69895000	632910	25928000	665080	170690	209110	778110	206450	168520	93145	97298	60496000	154260	427690	710650
Q9D379	Epoxide hydrolase 1	Ephx1	30	48318000	180350000	45241000	175160000	29653000	40253000	46223000	28406000	37720000	30484000	32144000	20145000	116300000	59279000	39648000	37003000
P63017	Heat shock cognate 71 kDa protein	Hspa8	30	450870000	286170000	402860000	304080000	463600000	430540000	407970000	492920000	418990000	386250000	400760000	462550000	306160000	381900000	466390000	442850000
Q9EQ20	Methylmalonate-semialdehyde dehydrogenase [acylating], mitochondrial	Aldh6a1	30	506130000	346690000	659010000	370050000	609120000	560850000	533750000	439170000	438710000	549930000	607370000	502980000	356620000	607810000	470790000	547190000
P16332	Methylmalonyl-CoA mutase, mitochondrial	Mut	30	68147000	44535000	72274000	44903000	72399000	60362000	58578000	71575000	55622000	62394000	72975000	64538000	43917000	68244000	71036000	60081000
Q91ZA3	Propionyl-CoA carboxylase alpha chain, mitochondrial	Pcca	30	11622000	39301000	15539000	35095000	11558000	20285000	25478000	9285100	18497000	14522000	16071000	11281000	34545000	19473000	20409000	16997000
P09103	Protein disulfide-isomerase	P4hb	30	803930000	498700000	808200000	562360000	554240000	650610000	657440000	793960000	680400000	601580000	601160000	617570000	451470000	608150000	588160000	655420000
A0A0R4J0Z1	Protein disulfide-isomerase A4	Pdia4	30	78080000	60136000	76745000	66381000	60866000	60027000	82965000	75869000	92630000	83653000	65227000	83326000	65842000	76408000	64574000	74703000
Q62261	Spectrin beta chain, non-erythrocytic 1	Sptbn1	30	4540700	7641000	6003500	8414700	1198600	5543000	5711900	4536200	5988400	5385600	5685400	4233000	8445200	4647300	5079700	5138300
Q8K2B3	Succinate dehydrogenase [ubiquinone] flavoprotein subunit, mitochondrial	Sdha	30	287410000	172450000	290910000	186520000	284490000	312120000	253320000	289670000	274790000	306750000	330320000	309260000	161120000	292440000	287020000	332540000
P26039	Talin-1	Tln1	30	3122800	14729000	4372400	10709000	157966	3194500	5167900	2614300	5022100	3188700	3460000	2856700	12174000	4042200	4353700	2403100
O35488	Very long-chain acyl-CoA synthetase	Slc27a2	30	3546800	84836000	5336100	81802000	2360700	7496300	10636000	3724000	10812000	6240400	5409800	4296400	57513000	9737700	7967200	4160100
Q03265	ATP synthase subunit alpha, mitochondrial;ATP synthase subunit alpha	Atp5a1	29	157210000	851400000	175870000	748970000	134180000	208990000	234860000	125390000	265600000	192770000	171090000	143800000	694420000	281510000	213890000	152030000
O35490	Betaine--homocysteine S-methyltransferase 1	Bhmt	29	3062200000	1693500000	3282600000	1678500000	4359800000	2960400000	3310700000	5183900000	2636200000	2128000000	4258300000	3560700000	2201300000	2292600000	3215900000	3669400000
Q8CGC7	Bifunctional glutamate/proline--tRNA ligase;Glutamate--tRNA ligase;Proline--tRNA ligase	Eprs	29	7559100	15544000	7438300	15930000	6668200	6149400	9549100	7160900	9469700	8024700	6713900	7504700	17772000	6151800	6032000	4824200
P56593	Cytochrome P450 2A12	Cyp2a12	29	35751	68042000	67047.2	50168000	343800	474800	1489500	150930	2392100	116128	131770	104500	50167000	532770	1608200	136460
Q8BL66	Early endosome antigen 1	Eea1	29	7351700	4174700	5956700	4529800	4870300	7289900	5232600	7752100	6147500	7038000	6806300	7404700	3860500	5768100	6135500	6517600
P37040	NADPH--cytochrome P450 reductase	Por	29	42088000	51265000	34252000	56346000	46049000	33887000	41108000	35693000	38718000	44860000	48382000	35072000	61827000	56356000	42279000	42820000
P50431	Serine hydroxymethyltransferase, cytosolic;Serine hydroxymethyltransferase	Shmt1	29	156710000	89959000	183230000	92802000	165710000	162810000	155730000	173270000	140420000	135010000	173280000	159180000	103230000	149400000	173220000	171440000
Q5SWU9	Acetyl-CoA carboxylase 1;Biotin carboxylase	Acaca	28	5500500	57732000	11891000	58031000	7102600	7384600	20963000	4694800	159978	7653300	6634400	4046300	35121000	11966000	6165400	8401700
P56480	ATP synthase subunit beta, mitochondrial	Atp5b	28	1264400000	1257400000	1688300000	1242100000	1683500000	1582200000	1632000000	1148000000	1600900000	1540300000	1596800000	1408300000	1177100000	1713000000	1449000000	1196300000
Q8BJ64	Choline dehydrogenase, mitochondrial	Chdh	28	162690000	86107000	146250000	85528000	141880000	149270000	102710000	151430000	95589000	129460000	147750000	126840000	76521000	142110000	142550000	167720000
P97872	Dimethylaniline monooxygenase [N-oxide-forming] 5	Fmo5	28	38967000	149140000	35790000	129880000	36838000	34503000	37643000	37850000	38023000	44033000	34962000	31564000	135860000	45093000	42229000	31283000
O88844	Isocitrate dehydrogenase [NADP] cytoplasmic	Idh1	28	278430000	313970000	226090000	321630000	308770000	256850000	269130000	280280000	264390000	239590000	239780000	264850000	335050000	256210000	268440000	229060000
P32020	Non-specific lipid-transfer protein	Scp2	28	509480000	615540000	629550000	682570000	377720000	450070000	548600000	396600000	449240000	511710000	510440000	494360000	644930000	482000000	502160000	522120000
Q9DC50	Peroxisomal carnitine O-octanoyltransferase	Crot	28	78343000	44605000	77966000	58993000	76893000	63178000	62317000	75197000	43383000	74564000	77983000	62836000	42571000	57060000	47810000	49074000
Q9QUR6	Prolyl endopeptidase	Prep	28	36493000	17760000	33907000	19485000	44596000	28696000	34599000	43212000	32251000	34605000	37072000	41368000	20086000	35424000	32192000	37230000
Q8CC88	von Willebrand factor A domain-containing protein 8	Vwa8	28	179060	28883000	343330	19586000	157940	456070	185410	147941	587430	127720	122910	134110	17695000	174500	275660	306800
Q9D6Y9	1,4-alpha-glucan-branching enzyme	Gbe1	27	25957000	84360000	43931000	71431000	30468000	25145000	18021000	23533000	11337000	9105200	8849300	14251000	68589000	32627000	22892000	34117000
P49429	4-hydroxyphenylpyruvate dioxygenase	Hpd	27	619100000	475680000	568290000	481770000	695480000	671770000	638250000	712200000	584300000	771720000	734960000	642570000	645680000	648930000	697170000	713680000
Q8BH00	Aldehyde dehydrogenase family 8 member A1	Aldh8a1	27	166060000	162560000	206450000	166490000	163020000	180050000	206330000	160910000	156120000	181270000	178310000	152170000	160140000	205960000	164650000	161300000
Q91YI0	Argininosuccinate lyase	Asl	27	302300000	338240000	272670000	340210000	355700000	375560000	365830000	390720000	384480000	470110000	397060000	330050000	384340000	344860000	382950000	321030000
Q9CWJ9	Bifunctional purine biosynthesis protein PURH;Phosphoribosylaminoimidazolecarboxamide formyltransferase;IMP cyclohydrolase	Atic	27	24500000	16823000	30826000	18568000	36457000	28298000	31861000	30191000	30467000	33960000	31211000	34314000	18537000	29849000	31431000	33530000
Q9QXX4	Calcium-binding mitochondrial carrier protein Aralar2	Slc25a13	27	8428600	66588000	10419000	63411000	6035100	10741000	17249000	7770800	9599800	5811100	7473100	5860300	39967000	14428000	17622000	11313000
Q91WU0	Carboxylic ester hydrolase	Ces1f	27	481660000	237270000	484820000	267950000	487890000	433140000	347530000	477410000	267590000	399150000	390200000	372030000	241940000	469520000	376780000	405420000
P33267	Cytochrome P450 2F2	Cyp2f2	27	24059000	94830000	29389000	70675000	31539000	31547000	57711000	30062000	49371000	33861000	25765000	26688000	82324000	44215000	39587000	26677000
Q3U2G2	Heat shock 70 kDa protein 4	Hspa4	27	43956000	29903000	54179000	31254000	59745000	48284000	49223000	50298000	45489000	49334000	47712000	54362000	34172000	51328000	50922000	50791000
Q9QXD1	Peroxisomal acyl-coenzyme A oxidase 2	Acox2	27	5193300	29509000	5067900	27680000	1568000	4008500	11111000	5334500	9123000	6109700	5208800	2051100	28200000	9179200	6983000	3854000
P29341	Polyadenylate-binding protein 1	Pabpc1	27	42747000	36662000	41112000	42240000	45060000	39330000	43199000	41220000	52156000	47756000	48138000	50806000	47891000	42771000	39605000	45941000
P42932	T-complex protein 1 subunit theta	Cct8	27	62226000	50161000	68536000	51086000	58156000	68990000	63708000	54753000	57431000	61211000	62308000	64291000	55882000	68586000	68186000	71896000
O70475	UDP-glucose 6-dehydrogenase	Ugdh	27	76966000	65786000	76982000	69766000	69668000	57525000	59513000	81774000	54974000	58522000	56665000	37346000	54443000	53878000	62391000	40691000
Q3UEL5	Urocanate hydratase	Uroc1	27	146380000	252490000	171520000	232450000	137380000	173230000	213240000	150240000	168660000	175070000	166090000	116490000	209800000	233980000	187450000	179290000
A2AH85	116 kDa U5 small nuclear ribonucleoprotein component	Eftud2	26	6701100	5490600	8748500	5483700	8856000	8460700	10329000	5657400	9544300	11079000	9703700	9695700	6659400	10069000	9405600	8224900
Q91VA0	Acyl-coenzyme A synthetase ACSM1, mitochondrial	Acsm1	26	221980000	236240000	245100000	244000000	409970000	245590000	381450000	322130000	380010000	336500000	378700000	360760000	297650000	431260000	290190000	280180000
P55264	Adenosine kinase	Adk	26	731650000	360690000	643840000	390410000	702770000	632030000	496070000	784120000	510930000	610150000	722730000	732420000	379220000	528460000	626280000	670000000
Q8BW75	Amine oxidase [flavin-containing] B	Maob	26	52297000	77841000	47158000	69219000	42563000	46659000	51562000	42056000	38684000	41006000	57045000	33238000	57271000	55413000	62438000	49390000
P16460	Argininosuccinate synthase	Ass1	26	88539000	1236800000	101720000	1100400000	84405000	169160000	225930000	109830000	219420000	244920000	131430000	98764000	1175800000	178940000	211130000	118640000
P05201	Aspartate aminotransferase, cytoplasmic	Got1	26	203560000	108650000	217020000	126180000	351310000	259030000	221790000	295170000	242620000	679060000	362300000	298690000	177960000	252470000	282370000	245590000
P35564	Calnexin	Canx	26	296640000	144740000	232630000	171740000	274810000	265560000	237140000	271270000	255560000	256410000	251370000	297140000	152630000	228860000	269710000	271500000
Q91X77	Cytochrome P450 2C50	Cyp2c50	26	23943000	153390000	18351000	141800000	20461000	29463000	37557000	24131000	33727000	10982000	26152000	16860000	120480000	29531000	32262000	19414000
Q8CHT0	Delta-1-pyrroline-5-carboxylate dehydrogenase, mitochondrial	Aldh4a1	26	178740000	152580000	117710000	154530000	179210000	143660000	113900000	169420000	99908000	143250000	153140000	102960000	153840000	112700000	106730000	106370000
P54869	Hydroxymethylglutaryl-CoA synthase, mitochondrial	Hmgcs2	26	1731100000	1640400000	1674000000	1651400000	1414900000	1294600000	959900000	1038700000	964950000	875850000	1276500000	1138700000	1184500000	1056800000	1016800000	1123500000
P54071	Isocitrate dehydrogenase [NADP], mitochondrial	Idh2	26	214170000	107720000	197780000	112750000	234400000	182950000	111790000	203530000	146790000	188820000	180510000	164640000	91559000	181950000	152650000	184680000
P16331	Phenylalanine-4-hydroxylase	Pah	26	13659000	136960000	16764000	120870000	16006000	25558000	41104000	16864000	43865000	33599000	20230000	20484000	168240000	32269000	30726000	20001000
Q8K411	Presequence protease, mitochondrial	Pitrm1	26	17411000	10960000	20331000	12000000	17780000	19980000	15527000	14975000	14232000	16906000	19822000	17779000	10857000	16714000	15769000	19793000
Q8VDN2	Sodium/potassium-transporting ATPase subunit alpha-1	Atp1a1	26	4929100	34954000	5771100	29335000	946660	9200300	8161000	2941300	9580300	6661600	5801100	5579400	23249000	8702600	10774000	7062200
Q9D0R2	Threonine--tRNA ligase, cytoplasmic	Tars	26	26554000	33642000	35148000	35725000	34828000	28403000	41450000	24708000	30124000	31115000	36953000	32860000	38685000	38062000	31700000	31885000
Q99JY0	Trifunctional enzyme subunit beta, mitochondrial;3-ketoacyl-CoA thiolase	Hadhb	26	526680000	406300000	578780000	406550000	560280000	546750000	455770000	434800000	457970000	480950000	530290000	502370000	427540000	539490000	507710000	559560000
Q9DBF1-2	Alpha-aminoadipic semialdehyde dehydrogenase	Aldh7a1	25	763940000	368150000	748150000	387370000	958560000	642490000	634780000	783200000	539890000	684200000	775270000	712240000	362080000	719940000	647920000	665740000
P55096	ATP-binding cassette sub-family D member 3	Abcd3	25	2019900	101370000	3237500	113620000	1328900	3484700	5004100	2183700	3303100	1146900	1667000	1438500	92249000	3742300	8458900	1998600
Q8VC30	Bifunctional ATP-dependent dihydroxyacetone kinase/FAD-AMP lyase (cyclizing);ATP-dependent dihydroxyacetone kinase;FAD-AMP lyase (cyclizing)	Dak	25	21990000	239340000	28611000	203740000	13719000	25143000	30785000	14957000	30617000	16542000	22673000	19085000	172930000	30413000	38566000	22300000
P26231	Catenin alpha-1	Ctnna1	25	8636600	11060000	10048000	10755000	9090700	9523400	11773000	6962600	12147000	13558000	9987300	10312000	13137000	11439000	10426000	8541400
G3X9T8	Ceruloplasmin	Cp	25	17655000	9710100	16108000	9407900	17117000	17689000	16632000	17640000	22047000	20895000	14805000	20099000	9765300	13886000	12891000	12974000
Q8CIE6	Coatomer subunit alpha;Xenin;Proxenin;Coatomer subunit alpha	Copa	25	103804	20796000	67047.2	21087000	157966	58323	88465	27035	75488	58164	133860	28757	16568000	81618	122270	24653
Q9DBE0	Cysteine sulfinic acid decarboxylase	Csad	25	354040000	173150000	218580000	194850000	312150000	296820000	153390000	222170000	196560000	358680000	237630000	307170000	243380000	270290000	402670000	441640000
A0A0R4IZY2	Cytochrome P450 2D26	Cyp2d26	25	35435000	124030000	38799000	114260000	34741000	35791000	49681000	22137000	53244000	34396000	35111000	25394000	101670000	60119000	44609000	36700000
Q921G7	Electron transfer flavoprotein-ubiquinone oxidoreductase, mitochondrial	Etfdh	25	177600000	115340000	181300000	125260000	177880000	169770000	148020000	155650000	147300000	131060000	167130000	159740000	109720000	157080000	160990000	183110000
Q9QXD6	Fructose-1,6-bisphosphatase 1	Fbp1	25	2149500000	1085900000	2436700000	1136000000	2227500000	1655200000	1600200000	1939800000	1290900000	2032800000	1680800000	1694000000	1043200000	1945300000	1884700000	2079600000
Q8CFX1	GDH/6PGL endoplasmic bifunctional protein;Glucose 1-dehydrogenase;6-phosphogluconolactonase	H6pd	25	13295000	21265000	13422000	20226000	16780000	11464000	17391000	14559000	17180000	14573000	10013000	13406000	21909000	21319000	16998000	13884000
P35492	Histidine ammonia-lyase	Hal	25	42724000	69951000	45770000	58541000	37883000	43624000	63282000	48243000	48291000	74420000	52020000	29365000	58943000	72101000	47130000	55734000
E9Q3X0	Major vault protein	Mvp	25	8458000	15155000	8870700	13483000	4182200	8384100	12396000	7486700	15884000	6476400	7076600	5690400	14070000	10813000	7178300	7315900
P11725	Ornithine carbamoyltransferase, mitochondrial	Otc	25	1597000000	840590000	1501700000	906800000	2129900000	1675000000	1294600000	1908500000	1469200000	1920800000	1877000000	1814700000	877230000	1476900000	1426400000	1629100000
A2ATU0	Probable 2-oxoglutarate dehydrogenase E1 component DHKTD1, mitochondrial	Dhtkd1	25	22843000	26830000	26539000	26503000	24100000	20466000	25676000	18451000	17358000	21337000	26826000	16163000	21966000	26987000	20429000	18589000
P38647	Stress-70 protein, mitochondrial	Hspa9	25	338270000	211010000	328660000	224040000	375880000	343550000	312490000	338110000	302340000	380130000	349930000	347560000	208580000	354670000	336910000	332170000
Q60864	Stress-induced-phosphoprotein 1	Stip1	25	81235000	48494000	75194000	53178000	72667000	77929000	75659000	74220000	70657000	76281000	62609000	72839000	56084000	83136000	84449000	80637000
P80316	T-complex protein 1 subunit epsilon	Cct5	25	44490000	33728000	47213000	35086000	45446000	44260000	47989000	35295000	37006000	41116000	42011000	34802000	37283000	49977000	49169000	42587000
Q8BWT1	3-ketoacyl-CoA thiolase, mitochondrial	Acaa2	24	492790000	1210700000	758420000	1163800000	734460000	764150000	1034300000	550720000	947550000	633980000	919290000	609700000	1200200000	919920000	864050000	769670000
Q9JLJ2	4-trimethylaminobutyraldehyde dehydrogenase	Aldh9a1	24	190030000	115200000	189440000	120370000	206330000	163400000	148810000	192120000	131540000	146780000	184420000	144630000	118070000	176410000	160020000	177850000
Q8K370	Acyl-CoA dehydrogenase family member 10	Acad10	24	152560000	128620000	195930000	135310000	205050000	173230000	188480000	155570000	150860000	160810000	162410000	116470000	125600000	194140000	190600000	162680000
Q8VCW8	Acyl-CoA synthetase family member 2, mitochondrial	Acsf2	24	25331000	124050000	33585000	109630000	24497000	37909000	45254000	21876000	46456000	26867000	36409000	30489000	103000000	47192000	44455000	38452000
Q8BGA8	Acyl-coenzyme A synthetase ACSM5, mitochondrial	Acsm5	24	46118000	47831000	44882000	48957000	57100000	47951000	46827000	43378000	42990000	41965000	48703000	39256000	45574000	61063000	46759000	46809000
Q3UEG6	Alanine--glyoxylate aminotransferase 2, mitochondrial	Agxt2	24	21450000	53299000	30104000	51373000	20137000	32995000	38877000	19126000	39399000	38016000	37903000	27794000	56490000	37004000	30612000	34149000
P00329	Alcohol dehydrogenase 1	Adh1	24	718760000	1456100000	1119000000	1350500000	899820000	867390000	1150500000	669120000	877590000	839540000	917160000	726130000	1325700000	1461600000	857710000	889170000
Q9ER72	Cysteine--tRNA ligase, cytoplasmic	Cars	24	12059000	6882800	11365000	7472600	12518000	9330700	11730000	11737000	12245000	14276000	11149000	13372000	7620100	10329000	11495000	10557000
Q9EQF5	Dihydropyrimidinase	Dpys	24	212140000	104720000	203380000	114510000	218330000	185810000	144380000	201740000	116220000	121420000	184320000	151160000	99895000	198670000	176000000	187390000
Q91YQ5	Dolichyl-diphosphooligosaccharide--protein glycosyltransferase subunit 1	Rpn1	24	41504000	113780000	59486000	110200000	34633000	48043000	79797000	35985000	74531000	47402000	39078000	45121000	96393000	65808000	56143000	53663000
P97494	Glutamate--cysteine ligase catalytic subunit	Gclc	24	41778000	51556000	37956000	49224000	44537000	28883000	34099000	39150000	33517000	34528000	29518000	33489000	49069000	46987000	35758000	33543000
O09173	Homogentisate 1,2-dioxygenase	Hgd	24	459840000	222450000	484220000	257820000	512960000	407560000	386550000	544450000	346640000	549610000	495930000	459160000	278590000	446250000	439550000	478330000
Q9Z2I0	LETM1 and EF-hand domain-containing protein 1, mitochondrial	Letm1	24	30842000	26259000	30348000	26031000	26622000	24788000	29324000	27094000	30178000	25528000	30371000	25686000	25354000	29692000	24573000	26833000
Q80UM7	Mannosyl-oligosaccharide glucosidase	Mogs	24	24258000	22661000	27316000	23583000	30222000	23536000	37151000	25044000	36458000	29059000	26027000	26748000	26558000	31080000	27635000	25193000
Q6GQT9	Nodal modulator 1	Nomo1	24	8639400	10515000	13512000	10907000	9681500	10993000	13909000	7364000	9473200	9682700	12158000	9944100	11408000	12366000	10742000	10512000
Q02819	Nucleobindin-1	Nucb1	24	31303000	17080000	29447000	17322000	29451000	29893000	28506000	32459000	35322000	27270000	28582000	34104000	16606000	27180000	26413000	31345000
A0A1C7CYV0	Plastin-3	Pls3	24	9706100	38918000	9961100	29623000	7020300	11753000	11809000	6824500	10935000	9733600	8157500	8411400	25504000	9898200	8784500	6028700
P48678	Prelamin-A/C;Lamin-A/C	Lmna	24	15231000	17081000	13502000	15031000	11265000	16268000	11356000	14387000	18232000	12733000	13196000	15632000	12098000	13938000	11867000	12836000
Q99MN9	Propionyl-CoA carboxylase beta chain, mitochondrial	Pccb	24	56250000	53232000	59862000	53271000	52663000	66478000	71556000	49125000	47936000	46476000	52600000	39700000	53050000	67703000	69668000	62566000
Q3UPL0	Protein transport protein Sec31A	Sec31a	24	8564800	40316000	7592200	40441000	7183200	8902500	8529600	7486600	13584000	6755500	8027500	9368700	29324000	7502600	8771000	7370600
P11983	T-complex protein 1 subunit alpha	Tcp1	24	19589000	21007000	20717000	21867000	15940000	21880000	22676000	15369000	19063000	20507000	20992000	17909000	23747000	23517000	23271000	19739000
Q3U4W8	Ubiquitin carboxyl-terminal hydrolase;Ubiquitin carboxyl-terminal hydrolase 5	Usp5	24	20934000	17867000	23438000	18448000	19638000	20284000	24601000	19876000	21271000	22312000	21861000	20909000	21146000	25082000	25564000	22212000
Q91ZJ5	UTP--glucose-1-phosphate uridylyltransferase	Ugp2	24	15655000	101800000	36716000	83892000	15974000	42581000	84172000	21686000	36393000	19758000	20666000	11392000	86449000	80558000	52297000	28169000
Q9Z1Q9	Valine--tRNA ligase	Vars	24	3547900	24280000	4279200	19010000	3196000	4971900	6999700	885910	6129200	4659100	4316900	4923000	18051000	7609500	4689400	4078100
P62259	14-3-3 protein epsilon	Ywhae	23	328230000	215710000	310250000	224840000	306890000	369650000	320190000	316880000	341730000	335440000	349620000	334490000	218530000	325900000	322210000	361640000
Q8QZR5	Alanine aminotransferase 1	Gpt	23	78680000	77520000	78121000	78338000	101540000	83789000	94910000	99042000	90460000	85676000	83953000	67113000	83534000	78673000	86821000	78703000
Q8BGQ7	Alanine--tRNA ligase, cytoplasmic	Aars	23	5520000	16186000	6506100	16184000	4889100	7933300	10346000	3885900	9178700	8476100	8049300	6024600	17350000	9530900	9300600	6948600
P17182	Alpha-enolase	Eno1	23	1576800000	771470000	1581100000	796300000	1639200000	1376600000	1105200000	1583000000	914480000	1080600000	1269500000	1265700000	750200000	1329300000	1281800000	1570300000
P17427	AP-2 complex subunit alpha-2	Ap2a2	23	1655600	28129000	1524600	18324000	545620	2086800	2097500	2042500	3734000	1272500	1482000	2068300	20075000	1694500	1587500	664200
Q4LDG0	Bile acyl-CoA synthetase	Slc27a5	23	5628800	64880000	6423500	53700000	3987600	8770800	11316000	4624400	14604000	9558700	8215600	6128000	45572000	12152000	9423900	5326900
P97742	Carnitine O-palmitoyltransferase 1, liver isoform	Cpt1a	23	3415600	32268000	4302500	29266000	3623100	3421500	6191200	2266700	6480200	6105900	4773200	4236700	26009000	6960900	5378700	3392600
Q91WT9-2	Cystathionine beta-synthase	Cbs	23	22731000	37542000	27875000	40230000	15155000	30142000	37915000	18481000	34318000	38361000	33927000	28685000	39368000	35631000	33648000	28217000
Q8VCN5	Cystathionine gamma-lyase	Cth	23	597530000	301600000	593520000	311910000	895040000	571290000	525050000	803890000	503780000	1187000000	763520000	560960000	343550000	615180000	531160000	585450000
Q3U1J4	DNA damage-binding protein 1	Ddb1	23	7073300	11778000	10540000	11440000	7635900	8493500	13574000	5307200	10226000	8274300	9711600	7661100	12477000	11070000	9975000	8873400
Q8BFR5	Elongation factor Tu, mitochondrial	Tufm	23	31814000	60684000	15551000	54124000	29884000	23884000	20590000	16670000	37287000	30451000	25346000	37552000	59670000	45589000	33889000	32393000
P97807	Fumarate hydratase, mitochondrial	Fh	23	236820000	149990000	246060000	164460000	320520000	233080000	258360000	277260000	231560000	374150000	253110000	277070000	163660000	269750000	239580000	209010000
A0A0J9YUI8	Glucokinase regulatory protein	Gckr	23	60305000	45904000	70910000	44146000	66144000	45569000	57962000	59616000	44490000	51097000	58851000	55840000	43483000	56183000	54179000	51119000
P16406	Glutamyl aminopeptidase	Enpep	23	10688000	13608000	12359000	13122000	11751000	13639000	13593000	9663900	9072600	10133000	10373000	10686000	11574000	13251000	14154000	13154000
P13707	Glycerol-3-phosphate dehydrogenase [NAD(+)], cytoplasmic;Glycerol-3-phosphate dehydrogenase [NAD(+)]	Gpd1	23	40426000	129890000	48900000	126430000	34923000	49362000	50524000	23692000	49269000	33441000	36898000	34733000	113130000	51601000	40886000	50559000
Q8CGK3	Lon protease homolog, mitochondrial	Lonp1	23	2757200	30962000	3611100	24083000	2194800	4540400	5373300	1692300	6952500	4950100	3176200	3037400	25343000	6909900	3813500	2430600
P36552	Oxygen-dependent coproporphyrinogen-III oxidase, mitochondrial	Cpox	23	84017000	52447000	114050000	58500000	98213000	96640000	90933000	90254000	69664000	64704000	103230000	94920000	52657000	79744000	91969000	92068000
P80318	T-complex protein 1 subunit gamma	Cct3	23	39029000	34256000	44298000	37897000	36691000	37301000	41939000	30936000	32316000	38828000	34672000	32490000	41545000	45813000	41482000	37976000
Q3UEP4	UDP glucuronosyltransferase 2 family, polypeptide B36	Ugt2b36	23	90946000	365450000	123170000	352490000	96372000	134420000	231810000	71768000	209530000	126800000	148520000	95441000	360020000	241250000	142470000	149960000
Q8VCH0	3-ketoacyl-CoA thiolase B, peroxisomal	Acaa1b	22	428210000	532830000	573500000	556580000	312980000	336360000	212220000	303850000	123950000	186290000	239260000	150460000	365490000	268600000	405740000	365850000
P14148	60S ribosomal protein L7	Rpl7	22	64591000	70977000	48403000	67824000	42686000	34731000	62094000	47830000	61062000	40347000	58505000	55021000	66970000	37886000	40388000	39476000
P60710	Actin, cytoplasmic 1;Actin, cytoplasmic 1, N-terminally processed	Actb	22	1368400000	1193200000	1657500000	1157200000	1557100000	1720400000	1718800000	1558600000	1769900000	1830100000	1860900000	1854800000	1291800000	1760900000	1597700000	1540700000
A0A0R4J107	Acylamino-acid-releasing enzyme	Apeh	22	44779000	24316000	48992000	25774000	49682000	45016000	42065000	50796000	40177000	43335000	41237000	49134000	26948000	50126000	48041000	44773000
B1AV77	Aldehyde dehydrogenase;Fatty aldehyde dehydrogenase	Aldh3a2	22	443880000	218250000	430880000	254970000	248280000	287150000	178510000	217590000	112700000	91572000	229060000	162030000	192960000	232390000	279840000	265090000
P48036	Annexin A5	Anxa5	22	235850000	115490000	247640000	116390000	286850000	176850000	181080000	235850000	168450000	232040000	185520000	203680000	115640000	187520000	162290000	204960000
Q61176	Arginase-1	Arg1	22	2053300000	971440000	2159800000	1082300000	2979500000	2099200000	2190700000	2488900000	1862800000	2932700000	2257400000	2261300000	1211100000	2183300000	2037600000	2006700000
O88428	Bifunctional 3-phosphoadenosine 5-phosphosulfate synthase 2;Sulfate adenylyltransferase;Adenylyl-sulfate kinase	Papss2	22	7814500	18895000	12096000	18840000	1349500	6570200	13031000	12053000	12692000	4709800	12051000	4677100	20872000	10982000	13936000	8982100
J3QNY6	Bile salt export pump	Abcb11	22	58811	22574000	26050	15272000	157966	81297	277860	147941	248960	49157	143516	134110	12429000	240570	381490	152277
P11714	Cytochrome P450 2D9	Cyp2d9	22	31033000	156230000	30783000	123000000	46716000	44696000	69864000	29178000	43746000	31299000	37748000	30845000	174610000	73882000	51552000	33198000
P10126	Elongation factor 1-alpha 1	Eef1a1	22	355810000	1223500000	415520000	1182000000	379120000	456100000	551070000	400200000	715580000	514120000	481030000	545700000	1180500000	500530000	472510000	407550000
Q91Y97	Fructose-bisphosphate aldolase B	Aldob	22	955250000	1369700000	803800000	1251300000	583140000	603550000	771430000	1089500000	621460000	627350000	734330000	522510000	1068400000	666030000	696010000	592480000
P35505	Fumarylacetoacetase	Fah	22	1140200000	535860000	1157400000	593710000	1523900000	997220000	1140500000	1424900000	948870000	1213700000	1272000000	1212500000	645980000	1117200000	1113300000	1071300000
Q9CQN1	Heat shock protein 75 kDa, mitochondrial	Trap1	22	219020	26848000	1124100	26025000	157966	218170	71434	164510	1535500	308800	1080800	445960	25522000	508010	331730	236270
P58710	L-gulonolactone oxidase	Gulo	22	246080000	258620000	255500000	284830000	241710000	249270000	291310000	244730000	314450000	244650000	317490000	314890000	347470000	306280000	259990000	302710000
Q8VCC2	Liver carboxylesterase 1	Ces1	22	205730000	156050000	262620000	142410000	169830000	202400000	164900000	178680000	150850000	119730000	209480000	115420000	119000000	196920000	210850000	176320000
D3YUM1	NADH dehydrogenase [ubiquinone] flavoprotein 1, mitochondrial	Ndufv1	22	47766000	30592000	43380000	29820000	28726000	48960000	42634000	40763000	31543000	17705000	34394000	30403000	20204000	29957000	51914000	67587000
Q9CXN7	Phenazine biosynthesis-like domain-containing protein 2	Pbld2	22	466400000	249600000	436510000	265170000	565500000	429070000	361040000	507930000	335440000	364560000	420390000	404620000	274270000	434650000	426470000	477710000
P21981	Protein-glutamine gamma-glutamyltransferase 2	Tgm2	22	25026000	28416000	38873000	29479000	23036000	26970000	37382000	27357000	38965000	34374000	33827000	37953000	27722000	30729000	24065000	28541000
Q8QZR3	Pyrethroid hydrolase Ces2a	Ces2a	22	348080000	172110000	320180000	179190000	502110000	298650000	311050000	466870000	240190000	416760000	294580000	269120000	186690000	427530000	317140000	337870000
Q61598	Rab GDP dissociation inhibitor beta	Gdi2	22	9945300	65460000	18644000	54420000	9911300	16785000	30819000	9568300	26820000	18656000	16239000	13857000	60328000	26071000	21242000	15156000
Q8R086	Sulfite oxidase, mitochondrial	Suox	22	213790000	103240000	197240000	112590000	220940000	165970000	122990000	189180000	109680000	140830000	168640000	151320000	93434000	146880000	146440000	163420000
A3KMP2	Tetratricopeptide repeat protein 38	Ttc38	22	34140000	32579000	31911000	32151000	37573000	30810000	35063000	40370000	34687000	41805000	32304000	34291000	35010000	29525000	34241000	30681000
P68372	Tubulin beta-4B chain	Tubb4b	22	19006000	147910000	21163000	125930000	17032000	27912000	38915000	15195000	43571000	29801000	19173000	26123000	139380000	39409000	27418000	20027000
P50516	V-type proton ATPase catalytic subunit A	Atp6v1a	22	8067000	7907900	8361600	8624200	6821100	10932000	10176000	6810400	11355000	11968000	10148000	9155000	9039900	9762800	11086000	9645900
A0A0R4J0I6	Acyl-CoA dehydrogenase family member 11	Acad11	21	175740	51186000	67047.2	60865000	183090	1006800	567180	154910	352010	243550	143516	80963	39057000	651590	1007500	152277
Q8BWN8	Acyl-coenzyme A thioesterase 4	Acot4	21	76249000	36622000	87869000	41149000	44385000	45303000	20724000	37907000	14548000	26622000	43346000	22626000	26618000	34047000	45418000	43573000
Q64FW2	All-trans-retinol 13,14-reductase	Retsat	21	33101000	29065000	32151000	30738000	26435000	28223000	20311000	20260000	23672000	24994000	34609000	34604000	19493000	23048000	21287000	25258000
B1AU25	Apoptosis-inducing factor 1, mitochondrial	Aifm1	21	21733000	59549000	21049000	54368000	18205000	27211000	29570000	18808000	29370000	21221000	23975000	20191000	52204000	30212000	30134000	27464000
O55029	Coatomer subunit beta	Copb2	21	10520000	16715000	14328000	17104000	10399000	14352000	14797000	7701200	17280000	16438000	14086000	14464000	17130000	15209000	13039000	13687000
D6RGQ0	Complement factor H	Cfh	21	23272000	14706000	19375000	15371000	19575000	22861000	18661000	22866000	27710000	25187000	18303000	25861000	13889000	18881000	15898000	21146000
Q64459	Cytochrome P450 3A11	Cyp3a11	21	5529300	127640000	5311300	101560000	1552200	11833000	14214000	5997900	16150000	7246900	6510100	6335700	114930000	12084000	17824000	8254700
Q9D1A2	Cytosolic non-specific dipeptidase	Cndp2	21	42407000	24730000	42583000	27917000	50515000	39948000	44724000	43094000	40352000	45138000	44899000	41752000	30049000	45626000	46223000	43414000
P50285	Dimethylaniline monooxygenase [N-oxide-forming] 1	Fmo1	21	29104000	44987000	18883000	38602000	28345000	16551000	17766000	20526000	11204000	14005000	16553000	11983000	38022000	24453000	19546000	15577000
Q571F8	Glutaminase liver isoform, mitochondrial	Gls2	21	7189900	40016000	8297700	34853000	9388200	12657000	15729000	6619700	15334000	19207000	9955900	8894000	32333000	18222000	9944300	9499100
P51855	Glutathione synthetase	Gss	21	56731000	29686000	50294000	29586000	54815000	47809000	39569000	56126000	46614000	63263000	48162000	59443000	26259000	42502000	44152000	48369000
Q91XE0	Glycine N-acyltransferase	Glyat	21	14233000	117270000	18454000	104290000	13717000	24027000	34014000	19457000	36804000	21208000	25047000	23234000	102040000	34386000	23115000	19188000
Q9D819	Inorganic pyrophosphatase	Ppa1	21	232990000	140910000	214980000	153420000	257260000	206460000	225500000	257880000	216340000	262970000	220580000	227600000	160020000	212450000	226900000	221090000
P06151	L-lactate dehydrogenase A chain;L-lactate dehydrogenase	Ldha	21	91077000	325950000	82543000	335190000	61600000	79087000	123200000	93182000	121710000	80257000	83054000	76708000	317490000	116250000	91788000	61280000
P70699	Lysosomal alpha-glucosidase	Gaa	21	21892000	11850000	16938000	13422000	25756000	19654000	15646000	20855000	16962000	15695000	17181000	18213000	11457000	19237000	19116000	17682000
O09159	Lysosomal alpha-mannosidase	Man2b1	21	30018000	13431000	25262000	14463000	34895000	25924000	24345000	28781000	31878000	29098000	28259000	32083000	13597000	26543000	24978000	24852000
Q8BI84	Melanoma inhibitory activity protein 3	Mia3	21	35841000	37710000	29623000	36102000	33068000	40880000	34368000	31232000	43344000	35078000	34021000	40967000	33287000	30520000	29618000	31187000
P26041	Moesin	Msn	21	33769000	17743000	30696000	20019000	35222000	35908000	25297000	35644000	32280000	37352000	34354000	37822000	17635000	26669000	25320000	27378000
P29758	Ornithine aminotransferase, mitochondrial	Oat	21	220280000	111330000	273660000	140070000	375400000	219580000	179780000	322920000	180690000	342170000	456930000	333300000	190020000	159000000	220710000	206160000
Q7TNG8	Probable D-lactate dehydrogenase, mitochondrial	Ldhd	21	59397000	47856000	56936000	52847000	65777000	56086000	68231000	75147000	93262000	72592000	80281000	87966000	51804000	59050000	56312000	61575000
A0A0R4J0I1	Serine protease inhibitor A3K	Serpina3k	21	38449000	46595000	44764000	45318000	55896000	67886000	114780000	45437000	135960000	79000000	60182000	86126000	85899000	77733000	64234000	65420000
Q8BWF0	Succinate-semialdehyde dehydrogenase, mitochondrial	Aldh5a1	21	123000000	64734000	113000000	69253000	128600000	106190000	89372000	117100000	79106000	89028000	102430000	89308000	58079000	103720000	90790000	103120000
P21614	Vitamin D-binding protein	Gc	21	69178000	35678000	60117000	36803000	66512000	62506000	51636000	66201000	63623000	68303000	56230000	67490000	29792000	51079000	55361000	56123000
A2CEK7	Major urinary protein 12	Mup14	21	746660000	417980000	573080000	549820000	1622900000	1062100000	1992700000	2399700000	2489500000	490640000	1642600000	3259300000	871550000	869670000	892510000	1469100000
Q78JT3	3-hydroxyanthranilate 3,4-dioxygenase	Haao	20	520450000	243850000	445160000	279190000	581730000	489460000	402570000	607070000	365680000	448010000	475010000	476760000	287100000	411780000	445960000	494250000
Q8QZT1	Acetyl-CoA acetyltransferase, mitochondrial	Acat1	20	789210000	456900000	818010000	491420000	851730000	724710000	499890000	683650000	503800000	570800000	795060000	680760000	452260000	602880000	638920000	699080000
Q9DBG3	AP-2 complex subunit beta;AP complex subunit beta	Ap2b1	20	78508	27437000	142620	23025000	193460	371090	1641200	147941	1080800	604700	641660	96309	23962000	777230	653310	88567
Q3TVK3	Aspartyl aminopeptidase	Dnpep	20	63329000	31549000	53001000	35907000	72046000	57004000	54994000	72711000	53256000	56281000	58090000	67409000	36998000	56312000	63239000	63300000
P14211	Calreticulin	Calr	20	330400000	166620000	266460000	187740000	325480000	281100000	302480000	371950000	358600000	356360000	316240000	420290000	190970000	280410000	252180000	307560000
P16015	Carbonic anhydrase 3	Ca3	20	3382300000	1982700000	3000700000	2005400000	3616300000	2672700000	2210800000	2999700000	1861900000	1258900000	2587500000	2035500000	2136300000	2403700000	2676700000	3240700000
Q63880	Carboxylesterase 3A	Ces3a	20	1099200000	567380000	1205900000	714900000	1864500000	1064300000	1817900000	1628300000	1661400000	1506500000	1555500000	1776900000	903980000	1635100000	1136000000	1146300000
Q9QZE5	Coatomer subunit gamma-1	Copg1	20	52799	27512000	67047.2	24735000	157966	84446	590330	43789	836720	45629	184840	134110	24045000	199280	198620	32252
Q05421	Cytochrome P450 2E1	Cyp2e1	20	13120000	196590000	16287000	210230000	17824000	20730000	27909000	12163000	34417000	14127000	19887000	17761000	186750000	26709000	24801000	13585000
P70694	Estradiol 17 beta-dehydrogenase 5	Akr1c6	20	221070000	611420000	252640000	622920000	213150000	256010000	398650000	292670000	386040000	269560000	368780000	259210000	667760000	400900000	269350000	294650000
Q8BWU8	Ethanolamine-phosphate phospho-lyase	Etnppl	20	32803000	17061000	25550000	12453000	31497000	26967000	21347000	31813000	18419000	64642000	24433000	22802000	15728000	27331000	31590000	33521000
Q91X72	Hemopexin	Hpx	20	92900000	44586000	94189000	56256000	108100000	88177000	98418000	132820000	170330000	149040000	85865000	176070000	53203000	62447000	63348000	61858000
A2ARD6	Kynureninase	Kynu	20	34912000	45387000	29411000	40498000	41045000	26714000	42617000	32888000	37713000	35208000	32909000	30879000	54464000	47981000	39421000	38928000
Q8JZR0	Long-chain-fatty-acid--CoA ligase 5	Acsl5	20	2179800	47747000	2803500	38123000	117860	3390300	4277500	1864100	3863300	2941300	2251000	1300300	33986000	5207100	4609600	2103000
Q91WD5	NADH dehydrogenase [ubiquinone] iron-sulfur protein 2, mitochondrial	Ndufs2	20	47327000	39742000	37964000	40065000	27058000	49387000	43997000	34060000	35249000	23732000	32810000	30211000	34733000	35008000	52551000	65679000
Q6GT24	Peroxiredoxin-6	Prdx6	20	1492600000	726290000	1318800000	804750000	1782600000	1354800000	1274500000	1571000000	1057100000	1170900000	1289100000	1235700000	866490000	1290900000	1297000000	1311700000
Q8C165	Probable carboxypeptidase PM20D1	Pm20d1	20	49978000	25278000	50716000	27431000	52800000	46045000	50394000	51678000	40219000	38667000	47576000	49124000	26850000	44980000	44789000	45980000
P24549	Retinal dehydrogenase 1	Aldh1a1	20	1724600000	922340000	1443900000	1005700000	1253200000	1246100000	1004200000	1428500000	778250000	351750000	1150300000	824880000	829760000	838190000	1257900000	1163300000
A0A1B0GSG5	Ribonuclease inhibitor	Rnh1	20	13904000	20926000	13205000	22532000	15000000	15866000	16095000	13996000	16407000	21137000	15775000	14402000	19705000	16214000	11711000	13188000
Q9EP89	Serine beta-lactamase-like protein LACTB, mitochondrial	Lactb	20	44006000	37055000	35793000	36976000	40987000	46643000	39552000	34858000	37792000	35871000	41666000	40052000	34645000	44985000	45131000	43988000
Q8VIJ6	Splicing factor, proline- and glutamine-rich	Sfpq	20	29368000	21934000	23264000	24698000	28156000	28183000	26386000	29070000	34371000	36165000	34554000	35777000	22230000	29457000	27892000	28114000
Q9DBG1	Sterol 26-hydroxylase, mitochondrial	Cyp27a1	20	159630	67059000	948360	66266000	126710	3411600	7006100	995930	7476900	1267200	1643000	2151600	89989000	3311200	6659400	1346300
Q9Z2I9	Succinyl-CoA ligase [ADP-forming] subunit beta, mitochondrial	Sucla2	20	20961000	53138000	16647000	45608000	36666000	23133000	28851000	21928000	28730000	30287000	24463000	27826000	46267000	28125000	21708000	23931000
Q9JMH6	Thioredoxin reductase 1, cytoplasmic	Txnrd1	20	71259000	36479000	64549000	40311000	79692000	62458000	58425000	83008000	57027000	62945000	68247000	71491000	38080000	60273000	67001000	71715000
Q9EQH3	Vacuolar protein sorting-associated protein 35	Vps35	20	1491200	9930500	1692900	19926000	864030	1916800	2284400	1900800	2282000	2046200	2264100	218840	11266000	2179400	1433600	1480600
Q99KC8	von Willebrand factor A domain-containing protein 5A	Vwa5a	20	11200000	9456600	10892000	10353000	10913000	12090000	10814000	9993600	10685000	10081000	9583100	11827000	8086000	5921800	6320200	7051700
Q8VDM4	26S proteasome non-ATPase regulatory subunit 2	Psmd2	19	764230	99490000	8051300	102950000	11543000	7981900	12854000	440310	20168000	12083000	6923900	2165200	113800000	17638000	9495400	2256400
Q3U3J1	2-oxoisovalerate dehydrogenase subunit alpha, mitochondrial	Bckdha	19	50819000	37702000	55557000	40002000	44690000	53248000	46987000	43390000	42777000	43405000	47647000	44070000	37902000	46870000	58861000	50104000
Q99JY9	Actin-related protein 3	Actr3	19	33075000	28036000	36888000	28853000	40241000	38674000	41219000	30774000	39778000	48468000	40900000	43099000	37158000	40108000	40732000	40654000
Q9JII6	Alcohol dehydrogenase [NADP(+)]	Akr1a1	19	700330000	338130000	554330000	366570000	796860000	491260000	435810000	700200000	434610000	426420000	514800000	484550000	355340000	492870000	464660000	559610000
Q9CZS1	Aldehyde dehydrogenase X, mitochondrial	Aldh1b1	19	33386000	77681000	57511000	60719000	31268000	36744000	40661000	29896000	34789000	89955000	33563000	21804000	39201000	36897000	27876000	26121000
Q8VC28	Aldo-keto reductase family 1 member C13	Akr1c13	19	76694000	91237000	72062000	93710000	83489000	80000000	78556000	92905000	73500000	62584000	75502000	79806000	89881000	83723000	79007000	77492000
A1BN54	Alpha-actinin-1	Actn1	19	11284000	9171800	10362000	8933100	9747300	11986000	9030500	10784000	7837400	10059000	8700300	9100300	9783100	9450200	9305400	10286000
O09174	Alpha-methylacyl-CoA racemase	Amacr	19	74342000	41043000	75732000	46644000	98919000	78459000	76104000	96988000	76057000	90617000	80095000	90218000	50747000	78770000	73405000	79141000
A0A0R4J050	Aminoacylase-1	Acy1	19	32093000	19427000	29308000	19091000	36889000	37298000	30597000	36462000	31582000	32582000	35433000	26986000	20213000	31924000	35231000	36524000
P12265	Beta-glucuronidase	Gusb	19	27095000	12470000	22146000	13126000	32467000	25829000	22245000	27424000	27009000	23367000	24876000	28738000	12142000	23207000	24234000	25701000
H3BL34	Carboxylic ester hydrolase;Carboxylesterase 1E	Ces1e	19	26571000	23062000	27647000	23614000	20756000	25157000	22694000	24694000	13060000	17566000	21480000	15057000	23818000	23429000	25780000	24614000
O88587	Catechol O-methyltransferase	Comt	19	182580000	130480000	195720000	135020000	194400000	164560000	204840000	205540000	167380000	153050000	177190000	177190000	139740000	227420000	173760000	175580000
Q64458	Cytochrome P450 2C29	Cyp2c29	19	9610600	160020000	10704000	130570000	9446500	17964000	21424000	10716000	24813000	7701200	9404500	7742500	138150000	18726000	25458000	11942000
P28843	Dipeptidyl peptidase 4;Dipeptidyl peptidase 4 membrane form;Dipeptidyl peptidase 4 soluble form	Dpp4	19	16593000	20077000	17764000	18747000	14923000	20428000	20914000	16842000	19777000	13214000	19477000	15664000	16987000	19990000	20608000	21891000
P06745	Glucose-6-phosphate isomerase	Gpi	19	223520000	108990000	248870000	110510000	231400000	164410000	157470000	244850000	158500000	193080000	172190000	197050000	114590000	205200000	234410000	244040000
A0A0A0MQF6	Glyceraldehyde-3-phosphate dehydrogenase	Gapdh;Gm3839	19	1553400000	1226700000	1917300000	1242900000	2117500000	1692400000	1850100000	2608300000	1657400000	1605400000	1611500000	1758100000	1151300000	1908100000	1851800000	1793900000
Q9QXF8	Glycine N-methyltransferase	Gnmt	19	1426300000	787440000	1221900000	932540000	1854100000	1231500000	1186900000	1566300000	979560000	1763100000	1448500000	1131800000	891680000	1106200000	1244300000	1324900000
Q8VCB3	Glycogen [starch] synthase, liver	Gys2	19	11111000	50585000	21367000	40249000	6353300	10859000	14884000	6233400	9591800	22194000	16501000	14354000	22235000	8735600	11676000	7481600
P68040	Guanine nucleotide-binding protein subunit beta-2-like 1;Guanine nucleotide-binding protein subunit beta-2-like 1, N-terminally processed	Gnb2l1	19	126750000	79552000	116170000	79958000	122000000	127490000	112420000	149830000	138160000	134500000	140360000	158890000	87680000	98621000	113080000	142540000
Q8BTY1	Kynurenine--oxoglutarate transaminase 1	Ccbl1	19	70688000	36763000	58436000	37319000	79877000	61455000	66508000	89885000	67592000	74284000	66326000	78446000	38170000	62711000	76238000	74640000
P14733	Lamin-B1	Lmnb1	19	9767100	6968100	8965800	6400700	7643700	11199000	9421900	9117900	9343800	8830100	10257000	9598400	6408700	10528000	9259400	10764000
A0A0R4J083	Long-chain specific acyl-CoA dehydrogenase, mitochondrial	Acadl	19	436690000	228430000	397550000	245830000	429380000	413420000	259020000	420290000	306970000	359350000	413260000	401090000	216710000	383820000	364360000	396890000
Q99MN1	Lysine--tRNA ligase	Kars	19	19383000	14726000	24652000	16681000	23098000	26886000	25381000	22378000	26482000	26862000	25718000	27397000	17044000	24437000	27624000	26916000
Q99MR8	Methylcrotonoyl-CoA carboxylase subunit alpha, mitochondrial	Mccc1	19	103804	44316000	430990	46301000	213730	113310	981770	147941	525960	392510	337040	189310	31695000	537080	407110	426700
Q8CAQ8-2	MICOS complex subunit Mic60	Immt	19	138620	32553000	957540	25140000	157966	1829900	1361700	243990	516490	104680	235780	417700	15072000	797680	3122000	1312700
Q9DC61	Mitochondrial-processing peptidase subunit alpha	Pmpca	19	34332000	17847000	31153000	19451000	37539000	28790000	27243000	32904000	28360000	32899000	29252000	33906000	20213000	29193000	29999000	29169000
Q8C5H8	NAD kinase 2, mitochondrial	Nadk2	19	110400000	60358000	97725000	64196000	117110000	108440000	84009000	112760000	94105000	105940000	110030000	119300000	60667000	88998000	91422000	106490000
Q61941	NAD(P) transhydrogenase, mitochondrial	Nnt	19	103804	33737000	18099	26184000	157966	267210	24333	111160	24057	79885	143516	134110	13503000	212650	85086	24614
P09405	Nucleolin	Ncl	19	82686000	40862000	67960000	44629000	86161000	76167000	69308000	73020000	73501000	90005000	74321000	85635000	48833000	61455000	72160000	80739000
P20918	Plasminogen;Plasmin heavy chain A;Activation peptide;Angiostatin;Plasmin heavy chain A, short form;Plasmin light chain B	Plg	19	15079000	9132700	10260000	9734400	13830000	15190000	11769000	14345000	19982000	15543000	13723000	17251000	10714000	10366000	12739000	13007000
Q9DBA8	Probable imidazolonepropionase	Amdhd1	19	82884000	81830000	92761000	77154000	96653000	99842000	101050000	106530000	85226000	129640000	88157000	77321000	79212000	117220000	91778000	91105000
Q9WU79	Proline dehydrogenase 1, mitochondrial	Prodh	19	2896900	28132000	376990	25983000	1506700	4261400	7907900	1694100	8479800	3826900	4239300	1601600	32036000	5852700	4538000	3966900
Q9JI75	Ribosyldihydronicotinamide dehydrogenase [quinone]	Nqo2	19	156850000	84481000	156650000	89957000	180450000	150930000	116550000	151600000	102390000	155790000	141330000	129400000	89747000	151380000	155320000	148830000
Q8BGL3	Sulfotransferase	2810007J24Rik	19	29017000	92623000	30291000	87901000	37779000	45459000	97183000	40536000	102470000	46293000	76683000	52692000	148810000	102500000	61857000	55161000
P80313	T-complex protein 1 subunit eta	Cct7	19	21260000	29194000	23472000	27562000	20075000	19089000	26237000	17077000	21070000	21984000	22737000	17921000	32175000	26047000	23104000	20712000
J3QMN4	Thioredoxin reductase 2, mitochondrial	Txnrd2	19	91803000	40785000	74490000	48083000	83090000	76072000	57202000	78982000	61028000	71556000	72850000	74991000	40280000	71934000	70302000	78352000
Q8BWQ1	UDP-glucuronosyltransferase 2A3	Ugt2a3	19	74710000	90001000	85159000	88174000	79036000	79099000	105640000	60262000	88456000	94228000	99680000	77753000	102310000	116280000	81328000	81706000
O88342	WD repeat-containing protein 1	Wdr1	19	20643000	19018000	25133000	20040000	24935000	27878000	25877000	19956000	34142000	32134000	29350000	31284000	20779000	26617000	27411000	26424000
Q8VCX1	3-oxo-5-beta-steroid 4-dehydrogenase	Akr1d1	18	137570000	81737000	131150000	88210000	127530000	106450000	123390000	167040000	111740000	105390000	151410000	99345000	83186000	127270000	112500000	111960000
P12970	60S ribosomal protein L7a	Rpl7a	18	47043000	55332000	39903000	55564000	47926000	34847000	36504000	51770000	52670000	42497000	40679000	53583000	63668000	32154000	31008000	33278000
Q9DBK0	Acyl-coenzyme A thioesterase 12	Acot12	18	22669000	16747000	21255000	18542000	15196000	16268000	13253000	18273000	12950000	13843000	16504000	13989000	15872000	16507000	17112000	16349000
P28474	Alcohol dehydrogenase class-3	Adh5	18	81262000	190420000	104220000	172500000	69299000	113540000	123060000	84404000	126150000	123460000	123680000	93201000	191000000	142060000	103540000	115250000
P27046	Alpha-mannosidase 2	Man2a1	18	9011300	9188400	9062800	9317500	7953200	6098300	11235000	7961900	10387000	9596300	7834400	8006500	10007000	8958100	8045800	6753400
P97449	Aminopeptidase N	Anpep	18	17808000	16013000	15466000	15860000	12117000	13075000	20575000	13804000	21935000	18462000	20117000	16231000	14294000	16962000	15091000	13508000
P32261	Antithrombin-III	Serpinc1	18	14470000	15116000	15442000	13868000	17563000	21357000	19141000	14313000	20567000	23575000	17234000	19694000	21834000	23655000	19590000	20736000
Q00623	Apolipoprotein A-I;Proapolipoprotein A-I;Truncated apolipoprotein A-I	Apoa1	18	305750000	178370000	302720000	192360000	378570000	526130000	318000000	403740000	392300000	383380000	388790000	503500000	254280000	247590000	325770000	386630000
Q922B2	Aspartate--tRNA ligase, cytoplasmic	Dars	18	5039200	20953000	12449000	21548000	7349200	8621800	17717000	7869400	18495000	13007000	12740000	9996900	23557000	15405000	10028000	12224000
P61222	ATP-binding cassette sub-family E member 1	Abce1	18	16946000	11769000	18604000	12336000	20311000	16021000	18074000	17410000	18295000	18867000	17113000	19072000	14970000	17329000	18186000	16637000
P48758	Carbonyl reductase [NADPH] 1	Cbr1	18	46746000	58947000	42202000	55730000	52507000	51025000	33624000	40777000	41233000	49338000	52159000	38155000	54841000	67089000	65134000	40148000
Q02248	Catenin beta-1	Ctnnb1	18	6028500	7108600	7547400	7218700	7799700	6359600	8691800	6675800	9649500	10378000	8418400	8392500	7875000	8976200	7212200	7980000
Q9JIF7	Coatomer subunit beta	Copb1	18	103804	29601000	45386	26933000	171250	56300	225770	147941	378670	246240	64119	68976	28100000	199330	204200	58728
Q9DB77	Cytochrome b-c1 complex subunit 2, mitochondrial	Uqcrc2	18	308170000	167000000	260200000	176670000	313780000	310160000	223770000	290340000	230320000	230630000	244870000	296500000	150340000	244160000	303180000	320260000
O08749	Dihydrolipoyl dehydrogenase, mitochondrial	Dld	18	209220000	126270000	182600000	135180000	239420000	178340000	153120000	204180000	149120000	177510000	190430000	165940000	125020000	181670000	156030000	169440000
O08553	Dihydropyrimidinase-related protein 2	Dpysl2	18	20198000	11428000	17852000	11898000	16032000	18702000	16194000	17497000	19794000	24567000	17997000	20730000	12223000	17508000	18542000	16154000
Q99KK7	Dipeptidyl peptidase 3	Dpp3	18	103804	13623000	1921300	10185000	419970	1732500	5515300	1451400	3855900	3203600	2493100	513420	13577000	4236500	4750700	1983400
G3X9S2	Ectonucleotide pyrophosphatase/phosphodiesterase family member 1;Alkaline phosphodiesterase I;Nucleotide pyrophosphatase	Enpp1	18	12337000	6127000	10838000	7562800	10447000	8665900	10107000	8355800	10804000	13590000	11191000	11909000	5438600	9786200	9687800	7430300
Q99LC5	Electron transfer flavoprotein subunit alpha, mitochondrial	Etfa	18	450370000	515380000	597540000	521020000	526910000	522660000	616890000	394540000	530720000	610900000	603100000	486390000	569120000	710210000	469980000	538330000
P23116	Eukaryotic translation initiation factor 3 subunit A	Eif3a	18	100330	18641000	495450	12961000	157966	839280	476360	21343	1603700	436260	181040	461050	12187000	480120	544450	409480
Q924Y0	Gamma-butyrobetaine dioxygenase	Bbox1	18	56201000	35941000	67551000	36370000	59985000	54985000	43745000	55648000	36089000	36214000	56067000	48958000	32243000	48311000	52259000	56637000
P15105	Glutamine synthetase	Glul	18	342170000	189640000	340010000	194630000	337670000	304100000	303730000	451950000	293670000	192090000	383290000	480260000	252180000	309200000	345030000	383360000
Q91Z53	Glyoxylate reductase/hydroxypyruvate reductase	Grhpr	18	234970000	167880000	243950000	181650000	249310000	207880000	304660000	281700000	291430000	226140000	264990000	248170000	197330000	253710000	220360000	251570000
E9Q0U7	Heat shock protein 105 kDa	Hsph1	18	8853600	8071700	9127300	8798900	9366800	10152000	10514000	9143700	10712000	10864000	8969400	10698000	9648500	10110000	10826000	11499000
P07901	Heat shock protein HSP 90-alpha	Hsp90aa1	18	10585000	32984000	14752000	30444000	12079000	14077000	21801000	10455000	22522000	16614000	12147000	12697000	38058000	19863000	17697000	14250000
B2M1R6	Heterogeneous nuclear ribonucleoprotein K	Hnrnpk	18	83351000	71619000	87145000	74151000	91024000	89469000	82222000	75270000	93538000	117560000	103210000	102200000	79956000	92457000	74749000	90284000
A0A087WRE7	Hydroxyacid-oxoacid transhydrogenase, mitochondrial	Adhfe1	18	63920000	39786000	78499000	42684000	89452000	73540000	77376000	79210000	58776000	71889000	77653000	66484000	43246000	77795000	67528000	69339000
Q8BIJ6	Isoleucine--tRNA ligase, mitochondrial	Iars2	18	9429500	15883000	15214000	15197000	9532700	12854000	12534000	8047000	11566000	12650000	13497000	10345000	14875000	13498000	12431000	10237000
Q71RI9-2	Kynurenine--oxoglutarate transaminase 3	Ccbl2	18	83772000	65215000	109190000	75328000	112310000	101020000	103930000	102190000	84537000	104440000	68997000	83249000	44265000	108160000	85758000	91192000
P45952	Medium-chain specific acyl-CoA dehydrogenase, mitochondrial	Acadm	18	270620000	204810000	376890000	213360000	295760000	281870000	202810000	262570000	199140000	242120000	255080000	229870000	181810000	287290000	238280000	250780000
P27546-2	Microtubule-associated protein 4	Map4	18	6824500	6243400	5885300	5973900	6692300	7818800	6243800	6093300	7939400	6611300	6908100	7611500	4221900	4831700	5090600	5596700
Q9DCN2	NADH-cytochrome b5 reductase 3;NADH-cytochrome b5 reductase 3 membrane-bound form;NADH-cytochrome b5 reductase 3 soluble form;NADH-cytochrome b5 reductase	Cyb5r3	18	74378000	145590000	91752000	132090000	64766000	62043000	97419000	71816000	66267000	64668000	59578000	52208000	130750000	95151000	76941000	69012000
Q8VDK1-2	Nitrilase homolog 1	Nit1	18	96142000	51441000	98348000	56590000	123430000	90895000	84390000	121530000	90176000	105860000	109700000	121040000	58599000	97496000	97942000	104460000
E9PZF0	Nucleoside diphosphate kinase;Nucleoside diphosphate kinase B	Gm20390;Nme2	18	506360000	245260000	448390000	256240000	646610000	438920000	441440000	627980000	499000000	479380000	480820000	566730000	264910000	436580000	521010000	529050000
P35700	Peroxiredoxin-1	Prdx1	18	1941100000	1022800000	1654100000	1170000000	2287400000	1820100000	1403000000	2073200000	1461000000	1734000000	1625400000	1814300000	1169400000	1529500000	1627200000	1880400000
Q9D826	Peroxisomal sarcosine oxidase	Pipox	18	63389000	74374000	66003000	84099000	46414000	57217000	58004000	52648000	54427000	57501000	64842000	45778000	76989000	65441000	66649000	57516000
Q9DBJ1	Phosphoglycerate mutase 1	Pgam1	18	573010000	267160000	522740000	299790000	586950000	531430000	446700000	674430000	491860000	523460000	526560000	571820000	284590000	464320000	548110000	617050000
Q60866	Phosphotriesterase-related protein	Pter	18	69285000	33149000	55161000	33701000	58045000	52114000	45888000	76424000	57175000	62008000	56318000	68573000	35123000	51292000	62423000	61014000
Q9CY58	Plasminogen activator inhibitor 1 RNA-binding protein	Serbp1	18	50843000	26738000	42135000	32072000	38171000	54100000	46539000	46419000	45619000	42302000	47938000	52370000	27688000	38111000	45473000	52139000
P50580	Proliferation-associated protein 2G4	Pa2g4	18	95401000	48847000	98285000	58858000	96651000	95021000	84217000	100480000	88957000	90652000	90180000	104100000	55493000	78937000	83412000	102570000
E9Q1S3	Protein transport protein Sec23A	Sec23a	18	3129500	32215000	4535300	26975000	3610100	4872400	8394400	2983100	6877100	5050000	5176200	3427400	25816000	7344700	7381100	3941500
P52480	Pyruvate kinase PKM	Pkm	18	25951000	17472000	31677000	18014000	27210000	28472000	28063000	29407000	44957000	45935000	28183000	34914000	15371000	26033000	21117000	17558000
Q91X83	S-adenosylmethionine synthase isoform type-1	Mat1a	18	255950000	470870000	295150000	488480000	216210000	342760000	328040000	244910000	373030000	458020000	395360000	269440000	431090000	299660000	357840000	301020000
Q8R0F9	SEC14-like protein 4	Sec14l4	18	10494000	27977000	10257000	27231000	11557000	15926000	16189000	9255300	18657000	20252000	13448000	14859000	33246000	18674000	14457000	12835000
P97364	Selenide, water dikinase 2	Sephs2	18	53813000	54890000	56740000	50628000	59305000	63106000	72917000	53664000	56681000	69212000	65910000	58407000	62166000	73753000	63202000	62432000
O35423-2	Serine--pyruvate aminotransferase, mitochondrial	Agxt	18	90566000	88974000	109980000	88134000	175450000	122610000	130810000	118470000	127650000	327730000	160770000	149130000	104330000	150890000	127420000	112570000
Q8C483	Serine--tRNA ligase, cytoplasmic	Sars	18	21957000	13533000	22225000	16469000	28032000	23380000	25749000	21552000	27572000	30556000	26459000	28947000	18689000	23270000	26634000	27398000
Q07417	Short-chain specific acyl-CoA dehydrogenase, mitochondrial	Acads	18	429310000	220330000	402890000	227550000	532060000	373460000	297310000	469380000	317740000	358100000	394040000	423600000	224080000	339950000	313990000	369100000
Q9Z2I8	Succinyl-CoA ligase [GDP-forming] subunit beta, mitochondrial	Suclg2	18	30974000	117460000	36900000	96044000	30272000	42618000	43483000	23564000	42613000	43368000	28636000	33009000	97033000	48607000	33113000	35997000
P80317	T-complex protein 1 subunit zeta	Cct6a	18	19380000	23936000	21040000	23864000	18008000	22943000	24943000	15168000	20640000	20191000	20093000	16412000	26540000	25310000	24722000	19653000
P05213	Tubulin alpha-1B chain	Tuba1b	18	19361000	145860000	18855000	131320000	20870000	28705000	34194000	16780000	44347000	31768000	20167000	27223000	150850000	35038000	28345000	21709000
P25688	Uricase	Uox	18	214990000	121960000	214630000	113170000	232210000	216860000	158490000	269930000	146550000	193880000	233270000	212870000	131590000	217730000	249970000	317540000
Q8QZS1	3-hydroxyisobutyryl-CoA hydrolase, mitochondrial	Hibch	17	13243000	53663000	21668000	48826000	9982300	22962000	35669000	12083000	33066000	21865000	24942000	16727000	48168000	30642000	21015000	21194000
Q9WTP6	Adenylate kinase 2, mitochondrial;Adenylate kinase 2, mitochondrial, N-terminally processed	Ak2	17	501530000	251010000	405480000	260460000	559200000	400330000	273830000	473530000	279910000	365730000	416190000	363230000	211970000	354010000	357410000	427220000
Q8VC97	Beta-ureidopropionase	Upb1	17	114790000	65089000	97810000	65492000	113920000	125270000	96864000	118750000	77817000	107000000	122020000	94701000	66622000	107510000	138960000	123030000
Q8R4N0	Citrate lyase subunit beta-like protein, mitochondrial	Clybl	17	58335000	30064000	54992000	29911000	61873000	54049000	40796000	58171000	39328000	49166000	52904000	52279000	25743000	47249000	44058000	48323000
Q9CZU6	Citrate synthase, mitochondrial	Cs	17	16637000	72902000	17699000	65885000	13927000	17411000	22814000	17664000	21195000	13197000	16107000	16658000	70557000	21897000	23997000	16359000
Q3TJI8	Corticosteroid 11-beta-dehydrogenase isozyme 1	Hsd11b1	17	886360000	397630000	937160000	453200000	780080000	694540000	652920000	813270000	640490000	723770000	793400000	625420000	399530000	902010000	619230000	639220000
Q6ZQ38	Cullin-associated NEDD8-dissociated protein 1	Cand1	17	25068	17760000	21379	18499000	124700	389170	565120	165580	630850	199960	14856	185340	16359000	338940	426600	279440
O35728	Cytochrome P450 4A14	Cyp4a14	17	187500	47677000	192340	22849000	157966	441190	858180	147941	873930	156290	161220	1266300	10801000	345790	466340	1364500
O35459	Delta(3,5)-Delta(2,4)-dienoyl-CoA isomerase, mitochondrial	Ech1	17	162840000	76305000	151280000	91118000	159750000	136500000	105850000	133260000	122530000	119620000	146330000	149300000	69836000	129150000	128360000	143850000
P10518	Delta-aminolevulinic acid dehydratase	Alad	17	176650000	85652000	175930000	90980000	206200000	149320000	139360000	182920000	119720000	128870000	169790000	154970000	93841000	160390000	167780000	172610000
Q9DCW4	Electron transfer flavoprotein subunit beta	Etfb	17	653540000	430580000	724520000	483060000	745180000	771330000	605720000	544750000	632580000	730470000	663050000	644280000	506850000	704470000	692910000	733340000
Q01279	Epidermal growth factor receptor	Egfr	17	7224300	12766000	3678400	13789000	14456000	10007000	20611000	17819000	29921000	23909000	12555000	24798000	23430000	16989000	11344000	12879000
A2ABY3	Ethanolamine-phosphate cytidylyltransferase	Pcyt2	17	64687000	40084000	75553000	46972000	72844000	62405000	52837000	66232000	48422000	62613000	63351000	62115000	44541000	61015000	68125000	80032000
P60843	Eukaryotic initiation factor 4A-I	Eif4a1	17	17958000	88313000	22817000	80405000	17880000	24446000	35059000	17924000	47651000	28179000	28149000	28206000	90445000	32691000	30860000	24467000
Q8K0E8	Fibrinogen beta chain;Fibrinopeptide B;Fibrinogen beta chain	Fgb	17	13807000	14220000	14321000	21043000	13759000	18422000	17246000	12543000	26734000	19396000	15407000	19774000	17789000	18600000	17460000	15826000
B7ZNJ1	Fibronectin;Anastellin	Fn1	17	9686000	10143000	8133200	12121000	11645000	8881600	8373400	8532400	9491900	9573900	9824500	10199000	7880400	8620300	8143100	9159300
P10649	Glutathione S-transferase Mu 1	Gstm1	17	1446200000	2130800000	1738100000	2106400000	813110000	1539100000	1184900000	1031600000	967790000	1341500000	1263000000	733470000	1617200000	1873100000	1544600000	1569700000
O09131	Glutathione S-transferase omega-1	Gsto1	17	105270000	51117000	85174000	55622000	101980000	92854000	76954000	121390000	75469000	105140000	89624000	85124000	47369000	93458000	89718000	105440000
A8DUK4	Hemoglobin subunit beta-1	Hbbt1;Hbb-b1;Hbb-bs	17	7236000000	4395900000	7809100000	4231700000	8299800000	13464000000	7128200000	6471700000	10779000000	9068400000	4784100000	7018700000	7038400000	7962800000	3861100000	5298700000
A2AL12	Heterogeneous nuclear ribonucleoprotein A3	Hnrnpa3	17	54611000	57239000	57406000	60396000	49590000	65130000	51737000	49534000	72102000	66381000	66739000	65555000	65119000	66828000	57645000	63678000
O88569	Heterogeneous nuclear ribonucleoproteins A2/B1	Hnrnpa2b1	17	202900000	139430000	217500000	147700000	193960000	231680000	239090000	194970000	280620000	304900000	273700000	283600000	180510000	256560000	218570000	252810000
Q91VM9	Inorganic pyrophosphatase 2, mitochondrial	Ppa2	17	64452000	32323000	57920000	37222000	64935000	53212000	45300000	62210000	49890000	54932000	55773000	60514000	31112000	47954000	53161000	55993000
E9Q4K7	Kinesin-like protein	Kif13b	17	4023900	10589000	2934000	10624000	475320	3614200	4476600	1060500	5963600	2231000	3139500	3276100	12427000	674720	1719900	774910
P24527	Leukotriene A-4 hydrolase	Lta4h	17	8297800	15452000	10058000	14506000	7860400	11224000	12809000	8114400	12745000	10378000	9122700	9216700	14467000	11833000	11553000	11071000
Q9WVL0	Maleylacetoacetate isomerase	Gstz1	17	1070500000	480960000	1104300000	554190000	1288000000	920330000	919040000	1188900000	770610000	949490000	1070400000	1020200000	547730000	969110000	860510000	994560000
Q922Q1	Mitochondrial amidoxime reducing component 2	Marc2	17	213070000	111120000	207070000	119420000	179510000	163680000	143260000	193640000	134050000	141350000	195060000	149470000	99976000	148030000	138860000	172730000
P70441	Na(+)/H(+) exchange regulatory cofactor NHE-RF1	Slc9a3r1	17	62644000	32175000	47763000	35957000	68467000	71383000	58162000	80261000	70965000	59689000	70164000	80619000	31294000	54316000	53731000	71918000
Q9JIL4	Na(+)/H(+) exchange regulatory cofactor NHE-RF3	Pdzk1	17	26573000	15504000	19272000	16850000	17593000	22379000	18443000	21871000	22472000	22720000	21598000	27716000	17083000	18733000	21287000	23218000
Q9CZ30	Obg-like ATPase 1	Ola1	17	72905000	37707000	67137000	40008000	86736000	55008000	58982000	82192000	54788000	54917000	61909000	71909000	42171000	53879000	53992000	69767000
Q9JHW2	Omega-amidase NIT2	Nit2	17	124540000	80835000	154290000	86890000	183410000	131820000	163480000	142190000	133260000	150580000	149140000	146620000	90062000	174600000	142040000	152250000
P30416	Peptidyl-prolyl cis-trans isomerase FKBP4;Peptidyl-prolyl cis-trans isomerase FKBP4, N-terminally processed;Peptidyl-prolyl cis-trans isomerase	Fkbp4	17	17517000	14783000	16394000	16461000	15690000	19632000	18727000	18785000	20976000	15878000	16901000	18711000	15653000	20349000	18673000	22678000
Q9WUA2	Phenylalanine--tRNA ligase beta subunit	Farsb	17	13386000	14671000	21039000	15506000	19044000	14483000	19681000	15535000	17409000	14215000	15548000	17241000	17494000	15364000	15476000	11158000
Q9R1P4	Proteasome subunit alpha type-1	Psma1	17	141870000	71730000	125970000	79071000	126290000	132330000	106810000	145080000	113590000	121790000	127520000	137140000	81053000	121440000	132230000	151050000
P19221	Prothrombin;Activation peptide fragment 1;Activation peptide fragment 2;Thrombin light chain;Thrombin heavy chain;Prothrombin	F2	17	16924000	9833900	16309000	10522000	19873000	17341000	12202000	15967000	17253000	17560000	14767000	17769000	10795000	12300000	13667000	13778000
Q8BK48	Pyrethroid hydrolase Ces2e	Ces2e	17	284030000	198310000	243130000	194890000	206500000	181710000	143280000	218330000	90029000	56728000	122680000	98843000	125480000	128920000	173730000	168030000
Q64374	Regucalcin	Rgn	17	3244600000	1643500000	2745300000	1885300000	4242900000	2971800000	2369200000	3629700000	2331400000	2215100000	3396100000	3257900000	1982800000	2481700000	2850000000	3220700000
Q9DBB8	Trans-1,2-dihydrobenzene-1,2-diol dehydrogenase	Dhdh	17	71094000	60229000	80753000	58673000	81485000	69186000	80257000	67447000	69839000	71101000	75415000	62737000	71192000	96140000	78436000	74060000
A0A1B0GR11	Transaldolase	Taldo1	17	71234000	46122000	69379000	51642000	60109000	65027000	57813000	64876000	57567000	56512000	60561000	58063000	53479000	52459000	52423000	67079000
Q64514-2	Tripeptidyl-peptidase 2	Tpp2	17	2056100	110260000	3271600	56585000	2918100	4632500	3318900	2671300	16274000	5882900	2323400	2170000	75731000	10233000	10115000	4600700
Q6P5E4	UDP-glucose:glycoprotein glucosyltransferase 1	Uggt1	17	1795400	7515300	3818600	8394800	723750	2921300	7034000	2224300	9052400	6029300	4320100	4204100	10447000	6405500	4459500	3206200
Q63886	UDP-glucuronosyltransferase 1-1	Ugt1a1	17	56402000	218160000	77935000	199510000	58789000	76945000	116450000	50031000	109810000	74923000	94237000	63083000	210790000	137360000	82500000	77708000
Q8K169	UDP-glucuronosyltransferase 2B17	Ugt2b5;Ugt2b17	17	80567000	278920000	131370000	277390000	125590000	114620000	285710000	83292000	217540000	143250000	161500000	116320000	343270000	310640000	164970000	173690000
G3X9Y6	Aldo-keto reductase family 1, member C19	Akr1c19	17	76529000	70649000	64156000	64288000	109750000	75270000	63548000	103650000	51654000	62232000	76673000	58740000	61087000	100240000	76862000	77515000
O88325	Alpha-N-acetylglucosaminidase	Naglu	17	16006000	7763400	12112000	8168300	21155000	14116000	16041000	17484000	17292000	12128000	14721000	19387000	9267000	15466000	14428000	15200000
Q8R084	UDP glucuronosyltransferase 2 family, polypeptide B1	Ugt2b1	17	8044600	67413000	10066000	65224000	11323000	14390000	32939000	11239000	32409000	15846000	16650000	15156000	99122000	24894000	20821000	16533000
Q8K154	UDP glucuronosyltransferase 2 family, polypeptide B34	Ugt2b34	17	8994400	61962000	14912000	54965000	13080000	12756000	30755000	9983800	31939000	15599000	17363000	12988000	65973000	30248000	21283000	15129000
Q9CQ62	2,4-dienoyl-CoA reductase, mitochondrial	Decr1	16	455960000	253270000	556770000	274920000	526010000	402940000	356010000	425490000	306020000	331730000	386480000	429030000	267040000	464710000	362050000	420170000
Q8BG32	26S proteasome non-ATPase regulatory subunit 11	Psmd11	16	9968700	19125000	10806000	19135000	7564800	12041000	15107000	6494800	14809000	10680000	9920500	10536000	22766000	15125000	11742000	11845000
P14685	26S proteasome non-ATPase regulatory subunit 3	Psmd3	16	131320	17286000	67047.2	16199000	157966	52631	267450	147941	398350	3655.9	168250	134110	18113000	386760	477570	106470
P62908	40S ribosomal protein S3	Rps3	16	139440000	89351000	138950000	90528000	139420000	127170000	142890000	147980000	135140000	136420000	132390000	152580000	99975000	104070000	130990000	140050000
P27659	60S ribosomal protein L3	Rpl3	16	51037000	51140000	37558000	49963000	43996000	41910000	47732000	56785000	49397000	44265000	49891000	53402000	52661000	34370000	38485000	35909000
Q9D8E6	60S ribosomal protein L4	Rpl4	16	83795000	81074000	61152000	78692000	55757000	43239000	82025000	62082000	78169000	46615000	65719000	72948000	83359000	47553000	50472000	48616000
Q9CVB6	Actin-related protein 2/3 complex subunit 2	Arpc2	16	22095000	16374000	18963000	17176000	21465000	24887000	22716000	21299000	25452000	25950000	24450000	23567000	19972000	22394000	24488000	24595000
P51881	ADP/ATP translocase 2;ADP/ATP translocase 2, N-terminally processed	Slc25a5	16	17524000	420940000	22047000	340010000	14612000	34215000	40453000	20665000	49816000	24292000	20113000	22332000	338560000	37518000	44378000	20206000
Q8CG76	Aflatoxin B1 aldehyde reductase member 2	Akr7a2	16	146080000	124710000	134070000	122010000	136660000	109440000	113730000	150980000	103790000	103900000	124340000	102850000	113240000	117820000	115160000	121340000
Q00896	Alpha-1-antitrypsin 1-3;Alpha-1-antitrypsin 1-1	Serpina1c;Serpina1a	16	80561000	125850000	72326000	129760000	81973000	122100000	127760000	78399000	185560000	106450000	83005000	102130000	152850000	100240000	99966000	94053000
Q9QWR8	Alpha-N-acetylgalactosaminidase	Naga	16	20275000	11811000	15760000	12428000	22032000	19882000	17500000	19818000	20532000	20111000	21699000	20835000	13902000	25269000	20987000	19578000
Q91VR5	ATP-dependent RNA helicase DDX1	Ddx1	16	7509200	10658000	8254500	10597000	8684900	8851200	11579000	5640600	10350000	8390900	7599900	9101700	11050000	11484000	8151400	7722800
A0A0R4J092	Beta-mannosidase	Manba	16	10158000	5172300	7614400	4606800	14298000	10317000	9013200	11937000	11896000	9007200	10674000	15788000	5742700	10191000	10118000	11782000
P23953	Carboxylesterase 1C	Ces1c	16	78067000	31834000	62122000	33137000	71052000	72281000	54693000	69896000	64834000	73390000	61815000	64608000	35072000	62606000	57264000	50279000
E9Q4G8	CD166 antigen	Alcam	16	28607000	16321000	27155000	16358000	32769000	31281000	31352000	29371000	37093000	48701000	28985000	38625000	17086000	31366000	30395000	28942000
Q9CZ13	Cytochrome b-c1 complex subunit 1, mitochondrial	Uqcrc1	16	119290000	112740000	102530000	119060000	120340000	107800000	146920000	110840000	143770000	96722000	114270000	95844000	109050000	143530000	148670000	145480000
O54749	Cytochrome P450 2J5	Cyp2j5	16	557870	23154000	412290	23923000	157966	622050	1160900	412840	1533200	455650	529840	567400	45203000	755550	1816100	459400
Q99LB2	Dehydrogenase/reductase SDR family member 4	Dhrs4	16	142860000	78019000	113250000	90039000	116630000	90473000	70593000	129920000	75477000	85530000	95369000	95262000	82003000	89472000	78134000	100380000
A2ACG7	Dolichyl-diphosphooligosaccharide--protein glycosyltransferase subunit 2	Rpn2	16	1996800	41027000	2026700	40390000	157966	2704100	4655400	599140	6998900	3668500	501840	1867800	29857000	4332800	4417300	1921400
Q9D8N0	Elongation factor 1-gamma	Eef1g	16	13509000	40015000	15043000	39361000	11092000	18005000	18899000	11704000	24518000	18400000	17282000	17155000	37838000	16666000	18878000	16607000
Q9D1Q6	Endoplasmic reticulum resident protein 44	Erp44	16	43309000	25931000	39145000	29670000	48483000	40487000	49718000	50375000	53316000	49988000	39039000	50285000	31778000	45605000	45752000	41860000
P12710	Fatty acid-binding protein, liver	Fabp1	16	17818000000	7937500000	16681000000	8298200000	18837000000	13196000000	11352000000	14211000000	8736700000	9388400000	12122000000	12071000000	7570700000	12729000000	13807000000	16370000000
O08914	Fatty-acid amide hydrolase 1	Faah	16	2160200	20933000	2600900	18844000	964230	2751900	5014800	1739900	3396700	2438400	2808900	1635300	18082000	2662100	3907700	2170200
Q60759	Glutaryl-CoA dehydrogenase, mitochondrial	Gcdh	16	146360000	202970000	279050000	204090000	181890000	187820000	243180000	122300000	208510000	208510000	262090000	193980000	196420000	243050000	189900000	227120000
P19157	Glutathione S-transferase P 1;Glutathione S-transferase P 2	Gstp1;Gstp2	16	5580600000	3213800000	4026800000	3426800000	14856000000	7763500000	10812000000	13521000000	11878000000	11155000000	8488100000	13321000000	4814300000	9836500000	8436600000	10778000000
Q61035	Histidine--tRNA ligase, cytoplasmic	Hars	16	18042000	11852000	18538000	13571000	25564000	17198000	19395000	18359000	20788000	25158000	17964000	23748000	14775000	22388000	19995000	21962000
Q9WU19	Hydroxyacid oxidase 1	Hao1	16	28511000	18832000	24753000	18723000	25401000	25081000	32164000	22734000	23419000	28605000	24935000	25496000	26999000	28188000	37589000	33223000
Q9JHI5	Isovaleryl-CoA dehydrogenase, mitochondrial	Ivd	16	48419000	66837000	51221000	69244000	58488000	71651000	75621000	77489000	86720000	89038000	82283000	56243000	70617000	65957000	64712000	65187000
Q91WN4	Kynurenine 3-monooxygenase	Kmo	16	5890700	39115000	5401300	32034000	5918900	6201100	9486300	5686700	9241200	6469300	7093300	5891300	30693000	7369800	8424500	6604400
Q91YP0	L-2-hydroxyglutarate dehydrogenase, mitochondrial	L2hgdh	16	19245000	13011000	18780000	12984000	19495000	18349000	16694000	16113000	13694000	18777000	17837000	15943000	12670000	17115000	18295000	17751000
P53395	Lipoamide acyltransferase component of branched-chain alpha-keto acid dehydrogenase complex, mitochondrial	Dbt	16	4033600	44289000	4857600	39282000	2357900	6569700	7553600	3118400	5515700	4863700	3752000	4246500	36711000	7794200	7067700	3732600
P08249	Malate dehydrogenase, mitochondrial	Mdh2	16	1175100000	574410000	1206700000	596620000	1660600000	1088700000	964240000	1301600000	952530000	1220000000	1076500000	1195100000	547020000	1069900000	900140000	1072500000
Q9CWS0	N(G),N(G)-dimethylarginine dimethylaminohydrolase 1	Ddah1	16	144160000	79204000	137720000	80302000	115730000	136550000	72252000	113370000	42529000	83599000	84390000	64916000	55425000	121240000	114670000	141610000
Q8CC86	Nicotinate phosphoribosyltransferase	Naprt	16	1418300	19207000	1333100	15762000	1199600	2210300	1835500	1507100	2547700	2177000	1682000	1527300	12322000	2468000	1461600	2044800
E9QKK8	Phospholipid-transporting ATPase;Phospholipid-transporting ATPase 11C	Atp11c	16	84716	21287000	103720	21483000	67468	318460	344400	46342	360380	69125	178090	133430	19189000	204470	297510	89503
Q5SUR0	Phosphoribosylformylglycinamidine synthase	Pfas	16	5626100	1702700	3713500	766010	6700800	7197300	4512000	12232000	7140700	5814500	5505400	8618800	1419500	5215800	4595700	4463800
Q9CQF9	Prenylcysteine oxidase	Pcyox1	16	30223000	16101000	28038000	15957000	32205000	26986000	26047000	38178000	25078000	23914000	29366000	30225000	17969000	25288000	27651000	30136000
Q6NSR8	Probable aminopeptidase NPEPL1	Npepl1	16	25174000	12906000	21601000	12958000	23004000	20550000	17866000	24656000	18674000	20565000	21709000	22289000	11877000	20952000	20215000	22163000
P35486	Pyruvate dehydrogenase E1 component subunit alpha, somatic form, mitochondrial	Pdha1	16	46770000	70924000	58526000	65670000	45608000	51588000	44408000	32833000	45496000	40687000	43402000	37651000	64419000	51473000	47479000	54137000
Q9D051	Pyruvate dehydrogenase E1 component subunit beta, mitochondrial	Pdhb	16	58217000	74012000	90421000	76187000	53490000	66866000	70800000	40295000	66890000	51163000	69634000	55640000	71985000	87263000	65093000	82734000
Q76MZ3	Serine/threonine-protein phosphatase 2A 65 kDa regulatory subunit A alpha isoform	Ppp2r1a	16	4870000	25765000	7314900	24530000	2574400	8448300	9886400	2364500	9654700	8206400	5705900	4580800	21934000	11533000	7804700	7507800
Q9QXZ6	Solute carrier organic anion transporter family member 1A1	Slco1a1	16	30132000	24695000	13608000	21048000	55570000	31511000	54701000	46393000	40607000	30290000	45586000	47510000	44858000	43744000	42957000	45817000
Q64442	Sorbitol dehydrogenase	Sord	16	1527000000	719470000	1550800000	805520000	1798400000	1267100000	1186400000	1827200000	1115200000	1195500000	1645000000	1518500000	778570000	1438900000	1248300000	1603500000
Q921M3	Splicing factor 3B subunit 3	Sf3b3	16	4901800	6059000	5274700	5635400	5350600	5786900	7343100	3872600	7357700	6582400	5928300	6345000	7423600	7977900	5288200	5196700
Q99LF4	tRNA-splicing ligase RtcB homolog	Rtcb	16	7890600	12500000	8822500	11864000	2914700	11554000	10943000	5417900	13085000	8371300	7630000	8734900	12979000	9595500	10162000	8158600
Q9DBH5	Vesicular integral-membrane protein VIP36	Lman2	16	52707000	26951000	40090000	29166000	56360000	51309000	51483000	60857000	57162000	45804000	51371000	66188000	32266000	41105000	55194000	59176000
Q91WT7	3-alpha-hydroxysteroid dehydrogenase type 1	Akr1c14	16	25569000	73754000	26723000	65293000	24003000	29412000	44413000	23876000	43809000	31105000	30246000	25776000	73356000	44962000	37141000	32686000
P21107-2	Tropomyosin alpha-3 chain	Tpm3-rs7	16	123580000	60616000	97318000	60938000	101200000	123090000	85254000	122330000	99227000	117900000	124370000	136070000	69656000	94394000	110600000	123680000
Q8VCR2-2	17-beta-hydroxysteroid dehydrogenase 13	Hsd17b13	15	37477000	94033000	36150000	73516000	28693000	26639000	23083000	30752000	21465000	37351000	23856000	21719000	48134000	35241000	24529000	19173000
B7ZCF1	26S protease regulatory subunit 6A	Psmc3	15	8513000	15842000	8637000	15588000	8480400	9676500	14045000	7285700	11426000	10663000	8807600	7141700	17257000	12569000	10726000	8367500
Q99N15	3-hydroxyacyl-CoA dehydrogenase type-2	Hsd17b10	15	46607000	155970000	57988000	143910000	72306000	57071000	81833000	54394000	67203000	52966000	60720000	55442000	165210000	64390000	56776000	53702000
Q99L13	3-hydroxyisobutyrate dehydrogenase, mitochondrial	Hibadh	15	236210000	142640000	252620000	156260000	243040000	222850000	196510000	231380000	139130000	186470000	215020000	153920000	134420000	224410000	198310000	208250000
P25444	40S ribosomal protein S2	Rps2	15	82265000	86354000	74519000	79942000	86864000	65118000	77167000	88230000	90119000	77921000	91589000	92065000	90610000	63599000	61272000	64649000
P62702	40S ribosomal protein S4, X isoform;40S ribosomal protein S4	Rps4x;Gm15013	15	89671000	100080000	77646000	95195000	99250000	65512000	79345000	111310000	101470000	89021000	91296000	102260000	103110000	62036000	62387000	71906000
P14206	40S ribosomal protein SA	Rpsa	15	269090000	146640000	295130000	168010000	288500000	255750000	316860000	263230000	266990000	279560000	262950000	314220000	172000000	265570000	276380000	274880000
Q9DCU9	4-hydroxy-2-oxoglutarate aldolase, mitochondrial	Hoga1	15	337830000	162880000	322570000	167650000	450040000	309540000	278840000	380600000	236210000	295940000	342550000	298090000	146750000	295830000	273910000	303340000
Q91WG0	Acylcarnitine hydrolase	Ces2c	15	44405000	24745000	50270000	22898000	80843000	50606000	61851000	87513000	54260000	24417000	79463000	78531000	34275000	39631000	59168000	75831000
Q3UNX5	Acyl-coenzyme A synthetase ACSM3, mitochondrial	Acsm3	15	5138800	17184000	5309900	14914000	17530000	13888000	14126000	13547000	7861000	6828600	14424000	8811600	17788000	15844000	14377000	10961000
Q8CFA2	Aminomethyltransferase, mitochondrial	Amt	15	44097000	29433000	44343000	28457000	46482000	35650000	25223000	41416000	26570000	37634000	38088000	33258000	21992000	34540000	29742000	34168000
Q60936	Atypical kinase ADCK3, mitochondrial	Adck3	15	23026000	31373000	27708000	22203000	22628000	26858000	27563000	23954000	16544000	23476000	20857000	12736000	28498000	24992000	19822000	21173000
Q9JLV1	BAG family molecular chaperone regulator 3	Bag3	15	12502000	9063300	11330000	10536000	10693000	12158000	11707000	12679000	12199000	10189000	11975000	12434000	8627400	8568300	10420000	9976200
Q91X34	Bile acid-CoA:amino acid N-acyltransferase	Baat	15	8859100	50095000	12448000	46882000	7685500	14078000	28990000	10407000	35096000	17175000	21362000	11930000	50190000	23569000	20352000	16354000
P01029	Complement C4-B;Complement C4 beta chain;Complement C4 alpha chain;C4a anaphylatoxin;Complement C4 gamma chain	C4b	15	5266500	9493000	6990300	10225000	1903500	5682800	8255500	4155100	9146600	6906100	5449300	6967600	8770900	6999200	4924900	4733800
P07310	Creatine kinase M-type	Ckm	15	103804	11782	67047.2	235301	157966	22722	46110	60875	193180000	231290	143516	134110	45554	135792	113190	152277
P00186	Cytochrome P450 1A2	Cyp1a2	15	3936200	44634000	2780500	34693000	6468400	6717700	13500000	5681300	12806000	4273300	8027800	6500900	66922000	10693000	10826000	5779700
P24456	Cytochrome P450 2D10	Cyp2d10	15	13615000	120900000	12979000	96783000	9548200	19514000	29491000	10639000	28509000	17432000	15228000	12202000	104900000	34681000	23541000	13374000
Q9QXY6	EH domain-containing protein 3	Ehd3	15	2744500	24226000	3839500	15189000	6395600	3206900	4979800	2983500	5686500	4467100	4528800	4305300	14667000	6529400	4527500	3647300
O54782	Epididymis-specific alpha-mannosidase	Man2b2	15	9400600	4589500	6211400	5285200	11616000	8358200	5898300	8040100	8889400	8323000	8561900	10381000	4556600	6808700	7187200	7543900
Q91V76	Ester hydrolase C11orf54 homolog		15	276010000	136870000	270150000	153230000	263960000	208260000	173070000	260100000	149970000	121600000	211150000	183810000	123360000	159540000	216150000	229330000
E9PV24-2	Fibrinogen alpha chain;Fibrinopeptide A;Fibrinogen alpha chain	Fga	15	18901000	19617000	16009000	28970000	19500000	23908000	22747000	15842000	33427000	23668000	18800000	22049000	24324000	19864000	23867000	19703000
P52792-2	Glucokinase	Gck	15	2336300	17503000	3631700	10294000	3626800	4146900	4484200	282680	3556400	2743000	2306100	1823400	13279000	3556100	4237800	3167800
P47791-2	Glutathione reductase, mitochondrial	Gsr	15	87964000	41879000	98776000	47592000	104720000	82822000	70551000	109320000	56861000	79998000	70746000	78076000	35987000	67419000	59472000	70741000
P30115	Glutathione S-transferase A3	Gsta3	15	3871600000	2248300000	3336000000	2452100000	2943000000	2743500000	2162100000	3737000000	1857500000	2098900000	2748300000	1951600000	2195100000	2885900000	3104700000	3396000000
Q5FW57	Glycine N-acyltransferase-like protein	Gm4952	15	13072000	36154000	17965000	33496000	12044000	13332000	16820000	12181000	13409000	8682700	13354000	8891700	34371000	23981000	14604000	15356000
Q9CPV4	Glyoxalase domain-containing protein 4	Glod4	15	66912000	39878000	49313000	39045000	70315000	35698000	42107000	65125000	35389000	33586000	34784000	34064000	43541000	51049000	39875000	39027000
Q9WTP7	GTP:AMP phosphotransferase AK3, mitochondrial	Ak3	15	30078000	71590000	31528000	68903000	27457000	43726000	40101000	29241000	40738000	34261000	31444000	27412000	67932000	45942000	38598000	36117000
Q9R111	Guanine deaminase	Gda	15	14840000	9746000	16464000	10798000	13934000	15666000	17205000	13846000	14539000	10417000	14785000	12393000	11082000	11424000	13974000	12334000
Q9ESX5	H/ACA ribonucleoprotein complex subunit 4	Dkc1	15	16960000	8754000	16533000	9206500	18390000	16263000	14027000	16048000	13860000	17556000	13918000	16272000	9434500	14861000	13612000	15780000
A0A0R4J038	Kininogen-1;Kininogen-1 heavy chain;Bradykinin;Kininogen-1 light chain	Kng1	15	25786000	13835000	19884000	14041000	26069000	28425000	21295000	27675000	31928000	36012000	22169000	31255000	16125000	20693000	22769000	21679000
Q9CPU0	Lactoylglutathione lyase	Glo1	15	1283400000	611390000	1238500000	674410000	1462900000	1074600000	1021500000	1309200000	848550000	884780000	1055000000	1092000000	653430000	1299600000	1097900000	1181800000
Q9DBN5	Lon protease homolog 2, peroxisomal	Lonp2	15	31559	11300000	51412	12561000	157966	63389	73575	147941	44630	74269	143516	35634	12004000	43204	50575	35387
Q9Z2Z6	Mitochondrial carnitine/acylcarnitine carrier protein	Slc25a20	15	12901000	45176000	14434000	41622000	12102000	11645000	11274000	9243400	12136000	5404000	17176000	12149000	26274000	12578000	14194000	11601000
Q99KQ4	Nicotinamide phosphoribosyltransferase	Nampt	15	6185900	10571000	8141700	9707900	5221000	6348900	6295400	5726100	5209100	8194000	7527800	4927800	7775100	5736200	7020800	2429600
Q9JMD3	PCTP-like protein	Stard10	15	65435000	53155000	54388000	51210000	74471000	43050000	61305000	66836000	58383000	66055000	65101000	53600000	61943000	63797000	54381000	55004000
Q8CI51	PDZ and LIM domain protein 5	Pdlim5	15	17995000	11906000	16215000	13067000	15202000	16579000	13943000	15544000	15502000	14488000	16476000	15493000	12789000	12536000	14734000	16488000
P43883	Perilipin-2	Plin2	15	6271100	38811000	11760000	39758000	414370	6399100	5182800	3504800	3447200	5456000	6473400	4952500	24702000	4222800	2895400	2536200
O35286	Pre-mRNA-splicing factor ATP-dependent RNA helicase DHX15	Dhx15	15	6824700	8139500	8239700	7518400	9920800	8387100	9647900	8178300	8845800	12717000	10829000	10133000	8816900	9427100	9123400	8857100
P67778	Prohibitin	Phb	15	54555000	69841000	54849000	72772000	33249000	70384000	59805000	55132000	28764000	22669000	34669000	26871000	51874000	44203000	85781000	80204000
O55234	Proteasome subunit beta type-5	Psmb5	15	46553000	19166000	37252000	26085000	34730000	39983000	27399000	44358000	29366000	36388000	41677000	37552000	23459000	39054000	40661000	51719000
Q9QYG0	Protein NDRG2	Ndrg2	15	29016000	94022000	35973000	84106000	23477000	45677000	55222000	26348000	50920000	37552000	30509000	26713000	85043000	49507000	46747000	35410000
P47199	Quinone oxidoreductase	Cryz	15	36588000	69694000	57830000	63737000	31160000	53210000	54822000	32426000	53455000	38752000	52481000	38425000	62551000	56326000	50462000	54781000
O88451	Retinol dehydrogenase 7	Rdh7	15	80205000	210430000	75694000	188700000	69890000	75030000	91824000	58053000	81157000	77802000	72280000	54530000	195080000	131550000	85630000	79469000
Q8VCA8	Secernin-2	Scrn2	15	47530000	23829000	46713000	26520000	52430000	40461000	38877000	46113000	32476000	36783000	38553000	35738000	27639000	44572000	43051000	42776000
Q9Z1Z2	Serine-threonine kinase receptor-associated protein	Strap	15	34451000	21155000	30695000	23476000	32115000	35622000	33368000	33853000	33748000	34337000	35651000	39090000	22432000	30507000	38489000	37375000
E9QNL5	Sulfotransferase;Sulfotransferase 1A1	Sult1a1	15	8023200	67650000	11382000	59992000	9554600	14725000	16979000	8853100	16721000	19665000	14375000	9035400	62283000	20466000	17292000	9891700
P80315	T-complex protein 1 subunit delta	Cct4	15	19631000	30067000	20941000	30009000	20906000	20157000	25721000	15214000	20652000	19332000	19497000	15332000	31737000	25285000	24305000	18782000
A0A0R4J018	Thiopurine S-methyltransferase	Tpmt	15	37618000	27264000	41370000	25627000	42228000	34248000	40584000	52419000	38879000	29647000	40132000	33244000	27628000	28184000	35882000	35443000
Q80W22	Threonine synthase-like 2	Thnsl2	15	19255000	18821000	18631000	17038000	21238000	18538000	20450000	19691000	20265000	15950000	24282000	18939000	18451000	21639000	21361000	22038000
Q99N42	Thymidine phosphorylase	Tymp	15	7413100	11917000	10429000	10165000	8453500	8169300	10521000	6011800	6768100	6109000	9596100	5821900	7947300	9584000	6980100	6510900
Q9DCS3	Trans-2-enoyl-CoA reductase, mitochondrial	Mecr	15	5846200	9181300	7739900	9167900	6750700	7767300	11832000	6725500	13083000	10610000	11947000	9217300	9764400	10764000	7524200	8246700
P20152	Vimentin	Vim	15	4498800	35432000	6369000	25161000	3686400	6048400	9629700	4242200	14897000	8549000	7819700	5393000	24730000	6933800	6285700	3174600
Q8VCQ8	Caldesmon 1	Cald1	15	7760000	7965400	6742600	7658500	4992500	10338000	6925600	7019500	9750500	9254600	8413700	10279000	6434100	5978100	6896800	9221600
P62196	26S protease regulatory subunit 8	Psmc5	14	3707400	16525000	3553300	12015000	2528500	2820200	5690600	2872900	5592600	4999300	3390800	3717200	13609000	4826900	3676100	3385200
Q9Z0S1	3(2),5-bisphosphate nucleotidase 1	Bpnt1	14	35820000	22644000	41303000	26473000	44931000	34015000	34234000	45309000	37557000	37268000	35508000	46449000	27011000	35923000	36561000	39589000
P70266	6-phosphofructo-2-kinase/fructose-2,6-bisphosphatase 1;6-phosphofructo-2-kinase;Fructose-2,6-bisphosphatase	Pfkfb1	14	11518000	6500600	12449000	7320500	12575000	9990100	10859000	13780000	6823200	7155100	10004000	9401800	9047200	8535600	12271000	11879000
Q8CAY6	Acetyl-CoA acetyltransferase, cytosolic	Acat2	14	547110000	260600000	563210000	267620000	624750000	440100000	473480000	592430000	433890000	498980000	479530000	463780000	281790000	532330000	475980000	536370000
Q8BGT5	Alanine aminotransferase 2	Gpt2	14	9005400	19017000	9813100	16597000	5601000	11114000	10734000	10121000	9876300	10685000	11519000	6537100	20682000	8677200	11746000	8474000
Q8BWP5	Alpha-tocopherol transfer protein	Ttpa	14	3347800	47144000	4930600	39352000	1291700	5666400	8681300	1419300	6123300	6040000	3239200	3666800	33183000	10214000	7851300	2177200
A0A498WGK2	Asparagine--tRNA ligase, cytoplasmic	Nars	14	6094600	13246000	8044500	14126000	6892300	7405200	11282000	6397900	11802000	11642000	8474000	9170300	14754000	12759000	10430000	7355800
Q9DCX2	ATP synthase subunit d, mitochondrial	Atp5h	14	239960000	248970000	219460000	230120000	189070000	260780000	219510000	195910000	228940000	215270000	229540000	204450000	227940000	245840000	256320000	258940000
Q8R016	Bleomycin hydrolase	Blmh	14	64047000	39045000	67364000	35606000	73380000	58813000	58615000	73032000	53607000	63995000	67928000	72973000	32597000	53078000	54892000	61434000
O35887	Calumenin	Calu	14	17857000	12367000	18025000	13153000	18293000	23413000	25018000	27031000	33882000	31035000	26117000	34645000	13603000	24876000	19698000	23364000
Q8R1G2	Carboxymethylenebutenolidase homolog	Cmbl	14	112410000	53786000	103260000	65156000	95009000	98005000	76514000	120140000	68108000	58052000	107320000	81183000	55662000	73070000	88036000	106520000
P18242	Cathepsin D	Ctsd	14	125520000	106680000	157350000	112000000	159870000	138330000	134790000	115260000	190190000	227140000	165550000	193600000	109860000	164220000	125780000	146960000
A0A0R4J140	Clustered mitochondria protein homolog	Cluh	14	911920	9329600	1566200	9266900	827930	1545400	5995200	1431100	4157800	1906700	2958300	692340	11467000	4406500	2429300	1885400
Q9D2G2	Dihydrolipoyllysine-residue succinyltransferase component of 2-oxoglutarate dehydrogenase complex, mitochondrial	Dlst	14	311080000	168800000	286820000	173700000	269680000	238560000	222440000	306790000	166330000	138000000	213770000	168590000	136350000	199670000	246680000	257960000
Q8BH95	Enoyl-CoA hydratase, mitochondrial	Echs1	14	363500000	215620000	330460000	231470000	339590000	332530000	268220000	333100000	270030000	315190000	328070000	314770000	233290000	303460000	329640000	307150000
Q9Z0N1	Eukaryotic translation initiation factor 2 subunit 3, X-linked	Eif2s3x	14	18189000	18206000	17930000	18717000	16427000	21688000	20100000	16385000	23581000	21168000	19882000	21332000	20100000	21357000	22934000	23674000
A0A0J9YUS5	Eukaryotic translation initiation factor 4 gamma 1	Eif4g1	14	3926500	17404000	2705900	16716000	1429100	4177700	4553200	2779500	4722400	1523800	1761600	3470400	13768000	1422400	2061500	2232200
A0A494BAI5	Ferrochelatase;Ferrochelatase, mitochondrial	Fech	14	20449000	32426000	26069000	33431000	23855000	38049000	37492000	22451000	41845000	37396000	36021000	34763000	30687000	39212000	31111000	37127000
B7FAV1	Filamin-A	Flna	14	3196600	6014100	3312400	4174400	1013700	4190700	2603300	2674000	4181200	3493100	3140400	2673200	3249100	2609900	2383100	2644300
O08795-2	Glucosidase 2 subunit beta	Prkcsh	14	64755000	34139000	46831000	37401000	54892000	56871000	51205000	62664000	60818000	59615000	51501000	64338000	35012000	50069000	57204000	58387000
P17439	Glucosylceramidase	Gba	14	20414000	8848600	14518000	10535000	24857000	18284000	21931000	19730000	24097000	24686000	22515000	26593000	11594000	19528000	21965000	18174000
P11352	Glutathione peroxidase 1;Glutathione peroxidase	Gpx1	14	1464700000	699610000	1255900000	719850000	1844100000	1268400000	1108400000	1657600000	1105000000	1255900000	1131100000	1377800000	737980000	1146400000	1305400000	1370100000
P15626	Glutathione S-transferase Mu 2	Gstm2	14	105180000	92102000	115240000	89879000	58108000	71893000	65514000	76480000	59209000	53767000	87673000	54334000	76631000	61026000	95818000	81595000
Q61646	Haptoglobin;Haptoglobin alpha chain;Haptoglobin beta chain	Hp	14	49395000	26046000	49853000	52956000	48204000	37516000	39029000	43896000	99516000	59234000	37386000	87703000	22510000	32034000	31478000	32932000
A0A0R4J259	Heterogeneous nuclear ribonucleoprotein Q	Syncrip	14	9487400	15606000	13021000	15250000	9069300	11661000	16224000	6829700	17703000	15588000	11879000	12478000	17256000	14526000	13334000	12118000
Q8VEK3-2	Heterogeneous nuclear ribonucleoprotein U	Hnrnpu	14	14316000	30810000	12692000	30768000	10883000	18287000	15257000	14088000	19856000	20495000	15959000	16303000	30713000	16584000	14432000	15181000
Q61425	Hydroxyacyl-coenzyme A dehydrogenase, mitochondrial	Hadh	14	613800000	275910000	659460000	322710000	633030000	516260000	454390000	556740000	361980000	422110000	538150000	444610000	255820000	505370000	442370000	463760000
P38060	Hydroxymethylglutaryl-CoA lyase, mitochondrial	Hmgcl	14	218030000	131300000	241060000	151510000	228720000	203900000	170690000	198460000	135900000	140390000	196970000	146950000	106290000	174220000	160770000	185510000
P70168	Importin subunit beta-1	Kpnb1	14	2522600	14025000	3595500	11397000	1662200	4151700	6519200	2021400	5718700	5377800	4450700	2755700	13568000	5878000	5994600	3447400
P09055	Integrin beta-1	Itgb1	14	23236000	13937000	20434000	13392000	22286000	22968000	18570000	19728000	22124000	23095000	20151000	24358000	14754000	20272000	18780000	18849000
Q8BFW7	Lipoma-preferred partner homolog	Lpp	14	9766200	6212800	8337600	6800400	9291900	8993000	7216200	10966000	9282700	10036000	8428100	8813000	7331300	7654800	9880200	9093400
Q9CW42	Mitochondrial amidoxime-reducing component 1	Marc1	14	8940400	33301000	10562000	31294000	9770100	9105500	11746000	7182000	9064700	7925500	10521000	7202700	26475000	10307000	9269900	8402500
Q9CZ44	NSFL1 cofactor p47	Nsfl1c	14	19974000	10889000	19699000	12192000	20740000	18415000	17344000	20653000	17227000	19276000	16697000	19936000	11897000	19175000	19594000	19889000
D3Z600	Peroxisomal targeting signal 1 receptor	Pex5	14	872340	4751800	3713600	4998500	1042800	3160700	3966400	2097200	2727400	2545300	1965900	1633000	6623100	3973800	3260100	3012900
Q8VEM8	Phosphate carrier protein, mitochondrial	Slc25a3	14	4226800	77248000	6597300	64892000	4093700	7015800	9815500	4855800	12428000	7781400	4626200	5699600	75210000	10622000	9832900	3902800
P70296	Phosphatidylethanolamine-binding protein 1;Hippocampal cholinergic neurostimulating peptide	Pebp1	14	484710000	236910000	442150000	250570000	538160000	360340000	305110000	424060000	290510000	266290000	376780000	374810000	229310000	301760000	407740000	413730000
Q9EP69	Phosphatidylinositide phosphatase SAC1	Sacm1l	14	10105000	13471000	8072400	13558000	9069800	8324000	12793000	8379700	9092300	9846200	10533000	7751200	14387000	10397000	10076000	10097000
P60335	Poly(rC)-binding protein 1	Pcbp1	14	12054000	48157000	12576000	44691000	11304000	13832000	17589000	8641300	20833000	15462000	11174000	13526000	44936000	15687000	13944000	10494000
Q8BWM0	Prostaglandin E synthase 2;Prostaglandin E synthase 2 truncated form	Ptges2	14	23495000	15347000	30157000	16081000	35727000	26641000	31844000	26903000	26027000	25804000	28519000	29866000	15292000	29518000	25729000	28364000
G3UXZ5	Proteasome activator complex subunit 1	Psme1	14	76799000	47171000	73758000	43022000	86816000	69623000	61080000	89239000	53544000	57789000	68259000	61639000	51522000	59288000	75786000	68609000
Q9Z2U1	Proteasome subunit alpha type-5	Psma5	14	148220000	74313000	153690000	83072000	146760000	143020000	120140000	141630000	114910000	118190000	123800000	136400000	79238000	126040000	142330000	147110000
Q9Z2U0	Proteasome subunit alpha type-7	Psma7	14	122140000	62646000	131090000	69967000	121940000	116680000	103670000	128180000	100140000	111820000	114410000	123880000	67624000	118640000	117360000	128640000
Q9R1P3	Proteasome subunit beta type-2	Psmb2	14	166520000	87568000	198510000	93451000	178130000	164890000	157210000	182950000	139580000	172420000	182260000	166620000	100720000	161130000	170070000	170820000
P70195	Proteasome subunit beta type-7	Psmb7	14	29098000	14052000	26180000	15371000	25287000	25119000	21541000	29934000	23180000	24116000	28231000	27177000	14037000	23810000	25732000	29421000
Q3TML0	Protein disulfide-isomerase A6	Pdia6	14	37055000	68243000	42399000	66134000	28201000	34461000	59039000	31710000	61505000	49227000	29631000	36294000	70800000	50208000	43990000	34249000
Q543K9	Purine nucleoside phosphorylase	Pnp	14	113940000	66775000	142790000	68488000	167460000	133130000	150200000	153760000	127060000	138180000	148840000	179610000	76785000	160060000	136360000	144300000
Q9DCQ2	Putative L-aspartate dehydrogenase	Aspdh	14	31883000	28800000	20362000	29459000	26016000	19405000	22575000	33142000	25894000	24698000	22345000	17567000	31679000	25459000	21962000	19511000
P51150	Ras-related protein Rab-7a	Rab7a	14	73500000	39389000	77775000	42347000	91001000	74119000	72560000	79027000	66952000	74082000	61800000	76635000	48597000	77275000	74678000	68718000
Q9DBL1	Short/branched chain specific acyl-CoA dehydrogenase, mitochondrial	Acadsb	14	18209000	33726000	17837000	28882000	27086000	21375000	30848000	19996000	33732000	31858000	30467000	18893000	39834000	32076000	27874000	26572000
Q9Z1N5	Spliceosome RNA helicase Ddx39b	Ddx39b	14	288810000	494130000	307870000	444850000	379610000	267190000	414020000	288440000	426150000	442570000	359800000	401460000	535850000	466150000	338460000	331310000
P17751-2	Triosephosphate isomerase	Tpi1	14	1265300000	661550000	1240200000	708480000	1570100000	1131900000	1059000000	1459100000	1115000000	1327800000	1237800000	1397900000	653800000	1203400000	1237600000	1344000000
Q8R164	Valacyclovir hydrolase	Bphl	14	23242000	86237000	34889000	76438000	23401000	29449000	41440000	22559000	40199000	29626000	30864000	25996000	79525000	41804000	30093000	28651000
Q60932-2	Voltage-dependent anion-selective channel protein 1	Vdac1	14	89186000	65336000	82142000	58740000	41842000	80260000	67786000	78349000	51996000	34551000	65759000	61890000	47800000	51841000	91868000	124690000
E9PVA8	eIF-2-alpha kinase activator GCN1	Gcn1l1	14	103804	2256600	67047.2	1864500	157966	125371	233700	147941	159978	116128	143516	134110	4229600	135792	113190	152277
Q99J77	Sialic acid synthase	Nans	14	14174000	7573700	14375000	8245500	19007000	13343000	15213000	17402000	18026000	16573000	13812000	20076000	8054300	13226000	12378000	15438000
Q68FG2	Spectrin beta chain	Sptbn2	14	90839	6511400	30493	6678900	157966	13296	85429	147941	15745	14143	110720	10125	5643900	33832	127410	33707
P62192	26S protease regulatory subunit 4	Psmc1	13	7465000	19951000	7990300	17563000	7039500	8701900	10275000	5731500	9861300	9543500	7248400	6622700	18532000	11283000	10185000	7977000
P54775	26S protease regulatory subunit 6B	Psmc4	13	3647400	10927000	3997300	10413000	4091700	4071500	5573600	3258600	5529100	4661800	4581700	3414100	11883000	5251600	4725000	4137100
Q3TXS7	26S proteasome non-ATPase regulatory subunit 1	Psmd1	13	183450	12854000	161110	16769000	157966	754740	442160	42113	1263000	740610	351190	56593	19519000	642090	387640	276500
Q99JI4	26S proteasome non-ATPase regulatory subunit 6	Psmd6	13	103804	153120000	33660000	238860000	157966	8913900	8797100	13177000	25637000	10363000	143516	134110	98609000	33023000	8802600	8465700
Q6P3A8	2-oxoisovalerate dehydrogenase subunit beta, mitochondrial	Bckdhb	13	32103000	25364000	43841000	24232000	35287000	34178000	30816000	30444000	28291000	34629000	35616000	30231000	23512000	39633000	29431000	30239000
Q99J99	3-mercaptopyruvate sulfurtransferase	Mpst	13	22059000	49092000	37304000	41892000	17726000	17115000	16382000	21161000	16787000	11059000	15869000	13008000	36153000	12662000	16795000	12543000
Q9DCD0	6-phosphogluconate dehydrogenase, decarboxylating	Pgd	13	5833200	23973000	9705500	21181000	5775200	7362100	10440000	4320100	8275500	8125000	8670400	6007300	20379000	9271000	10076000	7501200
Q8JZN5	Acyl-CoA dehydrogenase family member 9, mitochondrial	Acad9	13	3785200	16484000	4123300	11005000	2358000	5030000	6643200	789300	10146000	5726000	7805000	4749800	12383000	6649100	3586300	4204000
E9QNH7	Acyl-CoA-binding domain-containing protein 5	Acbd5	13	21079000	19298000	17861000	20050000	10276000	17395000	19189000	14330000	12763000	11437000	12327000	12035000	13196000	13977000	16864000	16932000
Q8R0F8	Acylpyruvase FAHD1, mitochondrial	Fahd1	13	106320000	52141000	108830000	59756000	126580000	91010000	90189000	112170000	83840000	115340000	107910000	115970000	51044000	107300000	89278000	98472000
P40124	Adenylyl cyclase-associated protein 1	Cap1	13	5378600	12628000	5885600	12255000	2958500	6586900	6614000	4015500	7866600	7450300	5674500	4806000	11980000	6651000	5244200	5020100
Q9D7N9	Adipocyte plasma membrane-associated protein	Apmap	13	32441000	16586000	26530000	16061000	23130000	21658000	19027000	26159000	16092000	17788000	21068000	19202000	13222000	19484000	18709000	20675000
P97429	Annexin A4;Annexin	Anxa4	13	21670000	11045000	19806000	13065000	18557000	15633000	18696000	18885000	15776000	13096000	16787000	18015000	13448000	19557000	18895000	12777000
P06728	Apolipoprotein A-IV	Apoa4	13	31820000	18362000	31988000	21457000	32859000	38059000	28546000	33900000	41849000	39974000	33554000	37296000	21685000	24629000	34988000	33679000
P08226	Apolipoprotein E	Apoe	13	230780000	121470000	188940000	115760000	170690000	189180000	143740000	180870000	164680000	157590000	174970000	185460000	118320000	144870000	174460000	192010000
Q99PG0	Arylacetamide deacetylase	Aadac	13	13226000	104080000	15355000	88633000	12497000	18596000	29673000	12378000	21334000	17796000	15434000	12833000	97237000	29001000	24724000	17894000
J3QMM7	ATP-dependent (S)-NAD(P)H-hydrate dehydratase	Carkd	13	30780000	16140000	28414000	16744000	38035000	29018000	25894000	33706000	24898000	28176000	28783000	29792000	17123000	28142000	30601000	30678000
Q62095	ATP-dependent RNA helicase DDX3Y;Putative ATP-dependent RNA helicase Pl10	Ddx3y;D1Pas1	13	1365400	30921000	1560300	33873000	165150	2993500	3854300	1520100	3457200	3474800	1750000	2147000	35129000	1971600	2869800	1474800
E9PZ16	Basement membrane-specific heparan sulfate proteoglycan core protein;Endorepellin;LG3 peptide	Hspg2	13	7706300	3836000	3984000	8573500	157966	3724900	2251600	4294600	1864400	2997900	1719800	2310200	1008000	626240	859310	1816000
P00920	Carbonic anhydrase 2	Ca2	13	84119000	37531000	59368000	35971000	82914000	107060000	64761000	81441000	97481000	58204000	44978000	58756000	53008000	56717000	38209000	45161000
Q60737	Casein kinase II subunit alpha	Csnk2a1	13	15927000	9581600	15462000	10219000	15718000	16460000	13587000	16145000	14920000	14544000	16941000	18240000	10653000	15080000	14570000	15956000
P30999	Catenin delta-1	Ctnnd1	13	1773700	8838000	2462600	6206400	3664000	2256600	2530000	1475900	3127800	3274800	2952400	2809400	10377000	2440000	901260	715030
Q03311	Cholinesterase	Bche	13	11697000	8043900	12755000	8540700	4531000	7647200	5423900	7313200	5248200	8982600	8333000	5436400	6730400	5793600	7244400	5798800
Q5XJY5	Coatomer subunit delta	Arcn1	13	10192000	23762000	11435000	25900000	6186300	12739000	11167000	7236100	14769000	11142000	11414000	11897000	18546000	8308600	5642500	7179300
B7ZNH7	Collagen alpha-1(XIV) chain	Col14a1	13	439160	2199100	3126700	1351900	600640	758590	2566900	662640	995100	7581300	717430	134110	1826200	8002300	1871400	1199700
Q64464	Cytochrome P450 3A13	Cyp3a13	13	103804	28554000	204400	39423000	157966	1185800	1679100	236130	2349200	604120	131670	191660	19281000	1145900	774700	322240
A2A977	Cytochrome P450 4A10	Cyp4a10;Cyp4a32	13	103804	9320200	575070	8652300	157966	125371	199380	147941	159978	116128	723680	134110	8526900	135792	1173000	152277
Q99L04	Dehydrogenase/reductase SDR family member 1	Dhrs1	13	3901500	25811000	5080000	26955000	3409700	4539300	5682300	4052700	6113500	4592900	5002700	4307800	18548000	6690200	5293200	3886700
Q8BVI4	Dihydropteridine reductase	Qdpr	13	543250000	263570000	499830000	279350000	667830000	527670000	393800000	642180000	339250000	525490000	514940000	526990000	289850000	402300000	496610000	560680000
Q9QYJ0	DnaJ homolog subfamily A member 2	Dnaja2	13	18843000	13967000	18885000	15426000	16587000	21111000	18827000	18783000	18462000	18096000	19774000	17569000	14416000	16070000	18377000	20508000
E9PUD2	Dynamin-1-like protein	Dnm1l	13	2693700	7930000	2651000	6452500	2361800	2372100	3416300	2577700	2717600	2702200	2089900	2594400	7653100	2501300	2146900	1790100
Q9EQH2	Endoplasmic reticulum aminopeptidase 1	Erap1	13	103804	17865000	1398800	11199000	157966	1463500	4301500	147941	1270900	2046900	143516	134110	13281000	3081400	1672100	152277
P42125	Enoyl-CoA delta isomerase 1, mitochondrial	Eci1	13	96925000	217510000	97531000	194070000	75982000	108770000	123370000	79528000	104170000	66379000	79706000	69410000	194360000	114640000	134090000	104690000
Q9QZD9	Eukaryotic translation initiation factor 3 subunit I	Eif3i	13	6930900	7876800	8245300	8246100	7235600	8284300	9527500	7349100	10240000	7341000	6278900	7774500	9147900	8241900	9179200	7964600
Q8BGD9	Eukaryotic translation initiation factor 4B	Eif4b	13	18573000	10251000	15088000	11558000	17631000	19432000	15581000	17821000	16036000	16813000	18646000	20304000	10965000	16346000	16254000	18643000
P63242	Eukaryotic translation initiation factor 5A-1;Eukaryotic translation initiation factor 5A	Eif5a	13	96400000	82891000	106790000	84312000	105400000	111920000	120360000	100680000	137220000	133470000	135880000	139280000	93523000	102700000	103130000	118960000
A2AJL3	FGGY carbohydrate kinase domain-containing protein	Fggy	13	988930	13230000	1640000	13788000	157966	2614000	4232900	1869600	3065900	2639500	2514700	1689900	14394000	3139600	2735300	1640000
Q3UER8	Fibrinogen gamma chain	Fgg	13	25189000	27111000	24018000	39624000	24827000	31862000	30459000	23046000	45533000	35769000	26864000	33338000	33872000	30933000	27750000	27756000
P05064	Fructose-bisphosphate aldolase A;Fructose-bisphosphate aldolase	Aldoa;Aldoart1	13	12224000	20469000	10110000	18981000	8860400	12759000	15109000	16427000	29479000	16193000	11764000	11336000	20735000	13650000	12064000	10680000
A0JNY3	Gephyrin;Molybdopterin adenylyltransferase;Molybdopterin molybdenumtransferase	Gphn	13	8116300	11600000	8113100	12371000	4428700	9090100	8645100	7048500	7669500	5246300	9183900	6123600	10758000	7495000	8324300	6394500
Q91VB8	Hemoglobin subunit alpha	haemaglobin alpha 2;Hba	13	4360800000	2689500000	4296600000	2607000000	5283300000	8185000000	4479000000	3879800000	6321200000	5452000000	2674300000	4140400000	4073200000	5426000000	2512300000	3155800000
Q9D0E1-2	Heterogeneous nuclear ribonucleoprotein M	Hnrnpm	13	2008800	24571000	4431000	16220000	1494000	7061300	7818700	3819900	10153000	10031000	5672700	8872600	20311000	6267700	5815300	4807300
Q8JZK9	Hydroxymethylglutaryl-CoA synthase, cytoplasmic	Hmgcs1	13	18425000	9827700	17716000	11886000	19502000	14187000	12964000	18537000	10842000	9542800	18196000	13001000	10125000	9737300	22571000	20405000
A0A075B5P6	Immunoglobulin mu chain C region	Ighm	13	17695000	16381000	22321000	17092000	5459600	24512000	8603200	6193400	24587000	26590000	16224000	18307000	6291600	3328200	7846500	4047600
P40936	Indolethylamine N-methyltransferase	Inmt	13	212790000	244040000	181180000	235900000	102310000	164090000	151340000	217710000	94892000	94349000	149180000	71828000	257340000	265680000	179850000	158080000
Q924B0	Inositol monophosphatase 1	Impa1	13	29756000	14154000	27439000	15876000	34398000	27004000	21324000	37830000	26564000	26613000	25788000	32929000	16590000	26081000	25318000	28905000
Q3V3R4	Integrin alpha-1	Itga1	13	10772000	6041200	8751400	5630200	10202000	8260600	7950000	8615700	10147000	10603000	8267600	10498000	6214700	8971400	9493000	8194500
Q9DB29	Isoamyl acetate-hydrolyzing esterase 1 homolog	Iah1	13	55750000	42073000	68267000	43918000	70273000	51658000	61098000	58542000	51368000	86001000	69320000	59018000	48315000	71560000	78072000	64071000
A0A1L1STE6	Isocitrate dehydrogenase [NAD] subunit alpha, mitochondrial	Idh3a	13	38408000	27925000	37033000	31892000	49069000	44381000	41118000	47393000	50138000	44544000	44822000	49044000	30198000	34241000	42338000	40382000
A0A0J9YU79	Ketohexokinase	Khk	13	556960000	312780000	684740000	307780000	620810000	452110000	419630000	578750000	281670000	290350000	489770000	453150000	262260000	492760000	425560000	532530000
Q8VBT2	L-serine dehydratase/L-threonine deaminase	Sds	13	46620000	83995000	47325000	64023000	72265000	57765000	85556000	51522000	82614000	166580000	74537000	65084000	66896000	91223000	67146000	50394000
Q99J39-2	Malonyl-CoA decarboxylase, mitochondrial	Mlycd	13	7440500	9942300	8938300	9601000	7410200	8891800	8971100	7571100	7242100	9784200	8802200	8190500	10087000	10069000	7820600	8594600
Q8R3F5	Malonyl-CoA-acyl carrier protein transacylase, mitochondrial	Mcat	13	11510000	6526200	12986000	6975200	11677000	9834800	9167700	11574000	9255100	8973700	10890000	11384000	5962500	10374000	9467800	11588000
H3BK44	Melanoma inhibitory activity protein 2	Ctage5;Mia2	13	7919700	6609200	6743300	7040300	6133100	7642700	6806100	5671600	6387400	6203000	5831100	6076900	6592200	6698400	6719100	6704000
Q9WVD5	Mitochondrial ornithine transporter 1	Slc25a15	13	1436400	52644000	1167400	58010000	157966	4824700	3672400	1414100	5135100	3575600	1107100	2073400	46042000	3909200	5642000	1038100
Q9DCL9	Multifunctional protein ADE2;Phosphoribosylaminoimidazole-succinocarboxamide synthase;Phosphoribosylaminoimidazole carboxylase	Paics	13	4525100	9927900	3247400	9531700	2461200	5121000	7042100	3862800	5874000	7264600	4577200	3739900	10637000	7978400	5730700	4226800
Q6P6M7	O-phosphoseryl-tRNA(Sec) selenium transferase	Sepsecs	13	14219000	8141300	15934000	9219500	15468000	14064000	14090000	16782000	12879000	14100000	14608000	16112000	8766300	13381000	15264000	14411000
P17742	Peptidyl-prolyl cis-trans isomerase A;Peptidyl-prolyl cis-trans isomerase A, N-terminally processed	Ppia	13	1533600000	763760000	1438200000	768010000	1896800000	1382700000	1253600000	1654900000	1283200000	1619500000	1338000000	1592700000	824310000	1365800000	1320200000	1551300000
P24369	Peptidyl-prolyl cis-trans isomerase B	Ppib	13	407610000	196440000	318320000	209770000	428980000	379190000	382210000	554550000	530480000	548460000	410560000	611390000	217250000	324230000	371620000	411640000
Q99P30-3	Peroxisomal coenzyme A diphosphatase NUDT7	Nudt7	13	113660000	101410000	90467000	101470000	149770000	108450000	189940000	191180000	142760000	152400000	157700000	157590000	177680000	141380000	159610000	180060000
Q9DCN1	Peroxisomal NADH pyrophosphatase NUDT12	Nudt12	13	20195000	17586000	23571000	17732000	15770000	14678000	18187000	17613000	15530000	15984000	19980000	14102000	15860000	18181000	19255000	19338000
Q3UXD9	Peroxisomal trans-2-enoyl-CoA reductase	Pecr	13	118580000	79392000	112930000	83571000	111640000	100890000	84049000	125720000	94227000	109820000	129450000	113490000	57831000	92444000	94619000	90567000
Q8JZZ5	Phosphatidylinositol transfer protein beta isoform	Pitpnb	13	33633000	15523000	30267000	16565000	30513000	29738000	23342000	36474000	25123000	27551000	28921000	31679000	16738000	27805000	24221000	32065000
A0A0R4J0B2	Phospholipase B-like 1;Phospholipase B-like 1 chain A;Phospholipase B-like 1 chain B;Phospholipase B-like 1 chain C	Plbd1	13	15594000	8716900	16137000	9612800	23848000	17352000	14644000	16810000	16934000	15322000	17289000	21552000	9693100	14900000	16960000	15029000
O35386	Phytanoyl-CoA dioxygenase, peroxisomal	Phyh	13	38434000	27274000	40450000	28065000	51165000	39097000	42344000	53268000	42333000	53884000	49775000	52344000	32443000	37908000	40939000	42623000
Q9QXS1	Plectin	Plec	13	4517600	16949000	4187700	10228000	3607500	8017600	3238600	4075600	968880	2567300	3465200	3148900	7063800	4873800	4223600	4300900
Q8BGJ5	Polypyrimidine tract-binding protein 1	Ptbp1	13	7716500	21115000	9051100	20747000	9109000	9071300	11039000	8387000	12928000	12656000	11957000	11031000	22855000	10211000	7505700	5852400
Q9WU78-3	Programmed cell death 6-interacting protein	Pdcd6ip	13	196560	13757000	54220	11322000	157966	102090	224330	147941	368790	154090	143516	134110	8608700	278370	103720	57049
Q9R1P1	Proteasome subunit beta type-3	Psmb3	13	139740000	72412000	163620000	80068000	165960000	133610000	138890000	155640000	105030000	136650000	144980000	152580000	82216000	148330000	125620000	137360000
A2ADY9	Protein DDI1 homolog 2	Ddi2	13	26351000	22948000	32147000	24149000	26552000	28757000	35451000	26833000	28114000	28117000	25529000	26552000	26721000	32665000	29585000	24562000
P49443	Protein phosphatase 1A	Ppm1a	13	25385000	14114000	24135000	13508000	22781000	22025000	16138000	22231000	15711000	18362000	18718000	21156000	13422000	16489000	20910000	23407000
Q3UJU9	Regulator of microtubule dynamics protein 3	Rmdn3	13	35123000	29998000	36372000	29937000	23834000	23095000	27635000	21812000	21668000	17051000	24790000	17600000	27560000	27123000	22425000	24428000
P62137	Serine/threonine-protein phosphatase PP1-alpha catalytic subunit	Ppp1ca	13	37136000	21713000	36745000	22328000	39380000	32367000	33229000	37726000	34101000	41955000	36103000	37578000	21435000	32367000	29824000	35457000
H3BKH6	S-formylglutathione hydrolase	Esd	13	67052000	93287000	80702000	92604000	62879000	67024000	84152000	65574000	82339000	67413000	87854000	57464000	85830000	83225000	72352000	75907000
P50427	Steryl-sulfatase	Sts	13	19215000	9831800	16929000	11616000	19125000	17669000	15317000	15515000	15651000	22380000	16907000	18211000	9359000	20656000	15236000	15865000
A0A498WGD8	Thioredoxin-like protein 1	Txnl1	13	47947000	27135000	46010000	30134000	51240000	45747000	40229000	54757000	39049000	42506000	42773000	50407000	30014000	42393000	48901000	52619000
P52196	Thiosulfate sulfurtransferase	Tst	13	512860000	294650000	395730000	292980000	698150000	403530000	303410000	665890000	335820000	452090000	419880000	503820000	325260000	326110000	284870000	378670000
Q8JZZ0	UDP-glucuronosyltransferase 3A2	Ugt3a2	13	1027800	52109000	1686500	40494000	157966	3632600	6387900	310740	4855500	1099100	1964500	2316500	60415000	3171000	2924000	340000
Q9JK81	UPF0160 protein MYG1, mitochondrial	Myg1	13	16409000	8724500	13546000	8889100	19714000	12033000	12612000	18451000	14875000	19827000	14691000	17128000	10681000	13213000	14689000	14271000
E9QMK9	UPF0317 protein C14orf159 homolog, mitochondrial	9030617O03Rik	13	4083200	10707000	4224700	9753400	1350700	5359500	6634900	3779900	5418600	3689900	4310100	3315500	7479400	5213300	4780200	5650500
P70697	Uroporphyrinogen decarboxylase	Urod	13	28453000	23266000	34081000	21959000	37240000	31036000	26229000	30067000	30506000	35202000	28552000	35985000	23852000	30215000	29017000	30596000
Q9WVJ2	26S proteasome non-ATPase regulatory subunit 13	Psmd13	12	3531600	15780000	4680900	14851000	2690500	4454700	5858500	2318000	6474100	5472500	4375400	3623000	17197000	7129900	6256000	4380400
Q61694	3 beta-hydroxysteroid dehydrogenase type 5	Hsd3b5	12	1389200	12415000	67047.2	10377000	11020000	4837100	15432000	5082900	16599000	7397500	8354300	14684000	41462000	11873000	7955300	8241300
P97351	40S ribosomal protein S3a	Rps3a	12	117760000	86660000	97775000	83009000	125850000	101750000	99388000	134800000	107120000	118380000	108950000	116410000	82408000	76263000	86065000	107540000
P62242	40S ribosomal protein S8	Rps8	12	85620000	96535000	75288000	90423000	80904000	48614000	84627000	81467000	101470000	69363000	83245000	99044000	90385000	47703000	53443000	61325000
Q6ZWN5	40S ribosomal protein S9	Rps9	12	83782000	74576000	66071000	70113000	73322000	54956000	70669000	87174000	81183000	71933000	69752000	82669000	79204000	51262000	56596000	57229000
P14869	60S acidic ribosomal protein P0	Rplp0	12	66934000	78209000	78214000	77152000	57708000	66718000	91431000	67230000	81445000	82584000	75244000	82712000	88031000	70833000	65555000	70567000
A0A0R4J0N7	7-alpha-hydroxycholest-4-en-3-one 12-alpha-hydroxylase	Cyp8b1	12	103804	9181900	67047.2	11042000	157966	222770	124630	147941	507530	116128	143516	134110	16412000	135792	113190	152277
A2AQN4	Acetyl-coenzyme A synthetase, cytoplasmic	Acss2	12	103804	31808000	424450	10818000	157966	289000	1236500	647210	958010	312460	451950	711850	30292000	597440	3333100	1394100
Q9R0Q6	Actin-related protein 2/3 complex subunit 1A	Arpc1a	12	15804000	12405000	20032000	14083000	18852000	16552000	15728000	15527000	15591000	15361000	21387000	17815000	15612000	23258000	19567000	20572000
P84078	ADP-ribosylation factor 1;ADP-ribosylation factor 3;ADP-ribosylation factor 2	Arf1;Arf3;Arf2	12	111080000	86182000	120420000	88019000	115680000	110310000	95708000	125770000	118180000	135870000	113100000	148520000	100270000	121670000	96582000	105850000
A2AS89	Agmatinase, mitochondrial	Agmat	12	61059000	73982000	50320000	75658000	50520000	67140000	76643000	50731000	68807000	49635000	45422000	44483000	82080000	69239000	61284000	60432000
Q5YD48-2	APOBEC1 complementation factor	A1cf	12	839740	14466000	1102400	17408000	197290	785430	1120800	381030	2250000	447460	839060	703000	14359000	396520	364540	357690
Q91WU5	Arsenite methyltransferase	As3mt	12	10752000	11199000	10032000	11266000	9117800	12259000	11317000	11147000	14852000	16268000	13234000	12947000	13642000	12027000	11266000	12302000
A0A087WPL5	ATP-dependent RNA helicase A	Dhx9	12	1648000	12829000	2244400	9312000	981980	2126800	3908000	2011100	3971000	4677300	3983100	3176800	13610000	4725400	3370000	2979700
Q9DBL7	Bifunctional coenzyme A synthase;Phosphopantetheine adenylyltransferase;Dephospho-CoA kinase	Coasy	12	4004900	25848000	5865600	24818000	2545900	5458000	8309200	3358000	7026200	6112100	5148800	4048500	26377000	8051900	6375900	4629500
Q9CXW3	Calcyclin-binding protein	Cacybp	12	24628000	11874000	24633000	12848000	25993000	22413000	17095000	24545000	18000000	21570000	18987000	22990000	13192000	20360000	22347000	21473000
H7BX88	Carnitine O-acetyltransferase	Crat	12	13942000	11169000	13430000	10846000	8251300	9837300	5242700	9743900	5203100	8123700	8539100	7431300	7799100	7665000	8471200	11903000
P18760	Cofilin-1	Cfl1	12	66381000	98812000	74066000	94002000	68896000	96538000	90098000	55551000	98235000	99202000	87120000	89558000	95889000	87495000	83156000	81567000
B8JJM5	Complement factor B;Complement factor B Ba fragment;Complement factor B Bb fragment	Cfb;Gm20547	12	7415600	5281700	7274200	5291900	7012800	8729900	6663200	6372900	8901500	6486400	6411000	7798500	6119400	7343200	5206600	5849900
B1AZ15	Cordon-bleu protein-like 1	Cobll1	12	3151200	3616300	2855200	4519300	1778200	4805800	2918200	1565900	4103700	2535200	3298500	3631800	2214000	1469600	1323500	1006400
Q9CR68	Cytochrome b-c1 complex subunit Rieske, mitochondrial;Cytochrome b-c1 complex subunit 11	Uqcrfs1	12	94115000	100080000	105960000	102720000	98185000	116050000	123930000	92988000	88972000	81896000	85814000	81294000	92299000	123070000	99348000	103610000
Q91X75	Cytochrome P450 2A5;Cytochrome P450 2A4	Cyp2a5;Cyp2a4	12	761670	41765000	741370	29360000	157966	2370500	2214200	262140	1476600	262070	332140	428620	14721000	1062300	2720100	239040
Q6XVG2	Cytochrome P450 2C54	Cyp2c54	12	14476000	29568000	10015000	30500000	18750000	13978000	21822000	15852000	15036000	7213000	16661000	7191300	32728000	19209000	19213000	12774000
Q80XN0	D-beta-hydroxybutyrate dehydrogenase, mitochondrial	Bdh1	12	92584000	182580000	133280000	175610000	90893000	77024000	64433000	58379000	58966000	80395000	77044000	73957000	152770000	89692000	55087000	50894000
E9PYG9	Deoxynucleoside triphosphate triphosphohydrolase SAMHD1	Samhd1	12	8824900	10090000	10975000	8399900	8609900	15142000	13994000	9335700	13176000	15585000	13313000	13345000	10057000	11167000	11822000	7870400
Q91YP3	Deoxyribose-phosphate aldolase	Dera	12	11665000	14612000	11271000	14359000	9953700	12422000	10896000	8711900	7098700	8781700	8076000	7162700	13516000	13219000	12046000	11516000
Q8BMF4	Dihydrolipoyllysine-residue acetyltransferase component of pyruvate dehydrogenase complex, mitochondrial	Dlat	12	8300000	52967000	12118000	45230000	4334300	11069000	17065000	5385400	10538000	7115600	6409400	5197000	39034000	13788000	13549000	8337500
P46978	Dolichyl-diphosphooligosaccharide--protein glycosyltransferase subunit STT3A	Stt3a	12	103804	23644000	67047.2	21672000	158220	277830	1227700	240330	1045300	98447	143516	134110	12379000	338530	256260	152277
H7BX01	Dynamin-like 120 kDa protein, mitochondrial;Dynamin-like 120 kDa protein, form S1	Opa1	12	103804	11631000	67047.2	6913100	157966	125371	42336	11902	152590	84292	143516	12233	8101500	72667	8506.1	9656.2
Q8K0D5	Elongation factor G, mitochondrial	Gfm1	12	5564200	8717900	10048000	8509700	7880100	5977100	11331000	4109600	9436400	8936800	9886800	7823100	9511900	10387000	7847600	9845400
Q3TCD4	Enoyl-CoA delta isomerase 2, mitochondrial	Eci2	12	16386000	35268000	15276000	34518000	18069000	16354000	15792000	11031000	17175000	17740000	14570000	14799000	33822000	20076000	15979000	14316000
Q8R050-2	Eukaryotic peptide chain release factor GTP-binding subunit ERF3A;Eukaryotic peptide chain release factor GTP-binding subunit ERF3B	Gspt1;Gspt2	12	6205500	14538000	8872800	10089000	8006400	6371800	16160000	7646200	10742000	8754600	7558900	9482500	15751000	10208000	9225300	7067200
Q6ZWX6	Eukaryotic translation initiation factor 2 subunit 1	Eif2s1	12	16968000	17546000	15775000	18697000	12912000	19365000	19609000	15451000	21378000	19550000	18876000	19007000	20876000	19953000	21876000	23631000
Q8JZQ9	Eukaryotic translation initiation factor 3 subunit B	Eif3b	12	4565900	10414000	4914700	9026600	2972800	4657900	8056900	5084800	8660600	6384500	6484800	6269400	11619000	7542200	8304300	7808700
P09528	Ferritin heavy chain;Ferritin heavy chain, N-terminally processed	Fth1	12	48678000	26458000	42590000	31183000	45002000	40723000	32795000	39474000	66813000	86921000	58934000	66176000	19789000	30806000	25641000	25575000
Q9CPX4	Ferritin;Ferritin light chain 1;Ferritin light chain 2	Ftl1;Ftl2	12	157670000	84867000	115110000	100950000	175840000	135720000	119060000	158630000	260890000	406130000	195750000	259240000	83330000	108430000	109600000	86809000
Q923D2	Flavin reductase (NADPH)	Blvrb	12	164020000	125620000	151300000	125050000	160290000	148800000	142220000	147190000	108470000	99971000	130920000	118630000	107060000	148360000	114170000	130300000
Q03249	Galactose-1-phosphate uridylyltransferase	Galt	12	29735000	16898000	27730000	13958000	43943000	27688000	29718000	37956000	24582000	30204000	28624000	30391000	17992000	38225000	37973000	32852000
Q9Z1Z0	General vesicular transport factor p115	Uso1	12	103804	6348300	67047.2	5879900	157966	125371	124630	16646	93029	13875	143516	134110	4829200	135792	23991	152277
Q64516-1	Glycerol kinase	Gk;Gyk	12	2863200	22823000	3105700	20583000	157966	4581500	4877300	542890	5515500	2173100	3503200	2086900	24711000	5235700	4252400	2721500
Q9DCY0	Glycine N-acyltransferase-like protein Keg1	Keg1	12	12551000	60245000	10230000	45065000	11527000	15466000	21096000	14967000	21200000	13581000	15756000	13647000	62333000	22277000	14021000	12307000
A0A494BA33	H-2 class I histocompatibility antigen, K-B alpha chain;H-2 class I histocompatibility antigen, K-K alpha chain	H2-K1	12	57804000	70839000	92126000	49250000	58709000	74859000	78691000	64850000	70765000	57161000	70549000	73169000	62972000	51324000	61228000	57230000
Q61696	Heat shock 70 kDa protein 1A;Heat shock 70 kDa protein 1B	Hspa1a;Hspa1b	12	11741000	9759200	9696100	8268600	16677000	14975000	14490000	16423000	19901000	11306000	11407000	16951000	9783400	14111000	13915000	12989000
P51859	Hepatoma-derived growth factor	Hdgf	12	34210000	15332000	23296000	18390000	34581000	32941000	24220000	31904000	28988000	33045000	32209000	35944000	15936000	26789000	27726000	35025000
G5E8T9	Hydroxyacylglutathione hydrolase, mitochondrial	Hagh	12	164130000	80612000	128190000	85206000	180710000	158260000	122820000	198720000	142210000	143880000	179340000	174030000	83021000	139960000	154920000	178830000
D3YY36	Inhibitor of carbonic anhydrase	1300017J02Rik;Ica	12	7835600	6557200	6600800	6318600	9152600	9232300	10012000	7078800	11834000	10113000	7744500	9302100	7844200	9006600	6720300	7448800
A0A2K6EDJ7	Inter alpha-trypsin inhibitor, heavy chain 4	Itih4	12	5180600	4160000	4774600	8602400	2997800	4805900	4793100	3495800	9015100	7188300	4244800	5575000	3321600	3919800	3700900	3636100
G3X977	Inter-alpha-trypsin inhibitor heavy chain H2	Itih2	12	9051700	6845500	8797000	7614200	7453200	10488000	8075900	6025600	12100000	14709000	7426400	10102000	7827000	9098800	8360200	8383500
A0A0R4J0P1	Isobutyryl-CoA dehydrogenase, mitochondrial	Acad8	12	3088500	22398000	4502800	18625000	6354100	6265200	7566200	5431900	5205700	5362100	4380800	2936400	18977000	9526200	7071000	6976900
Q9WVM8	Kynurenine/alpha-aminoadipate aminotransferase, mitochondrial	Aadat	12	48667000	58969000	41997000	56489000	62596000	40884000	76327000	74258000	59217000	72877000	56194000	57811000	72345000	49242000	52263000	50288000
Q3TMN1	Methionine aminopeptidase 2	Metap2	12	18821000	9258400	14653000	10230000	17984000	17086000	16031000	17248000	13204000	15273000	16448000	17994000	9679300	15162000	17381000	19372000
Q9QZD8	Mitochondrial dicarboxylate carrier	Slc25a10	12	1561200	68891000	2869800	63401000	546540	3042600	3475600	907130	3238800	667020	779010	619350	37476000	3343600	3835700	1649900
P63085	Mitogen-activated protein kinase 1	Mapk1	12	9271900	5591400	8327200	6609500	9067000	7194500	6321700	9185500	6921400	7000100	6087800	8262500	6685100	7590200	7476500	7048300
Q5RKZ7	Molybdenum cofactor biosynthesis protein 1;Cyclic pyranopterin monophosphate synthase;Cyclic pyranopterin monophosphate synthase accessory protein	Mocs1	12	28625000	16935000	24902000	16765000	38271000	25281000	24007000	34198000	24534000	24741000	29461000	30145000	19999000	27018000	23447000	25430000
Q99LC3	NADH dehydrogenase [ubiquinone] 1 alpha subcomplex subunit 10, mitochondrial	Ndufa10	12	4742000	31120000	6449100	24442000	3182400	5765000	9705700	4505800	6438000	2626200	3736400	3018800	19410000	6812700	9441000	6818800
A0A0R3P9C8	NADH dehydrogenase [ubiquinone] 1 alpha subcomplex subunit 9, mitochondrial	Ndufa9	12	12028000	21678000	11851000	23125000	2974200	11185000	17554000	10214000	9444400	4793300	9142100	5846500	16936000	11977000	18341000	18731000
Q9CRD0	OCIA domain-containing protein 1	Ociad1	12	37810000	21315000	40148000	26216000	28996000	32126000	31493000	31874000	29689000	34000000	34967000	37366000	25613000	35784000	29455000	32598000
P99029-2	Peroxiredoxin-5, mitochondrial	Prdx5	12	420830000	258270000	400860000	244720000	719050000	368050000	460290000	529200000	428820000	450490000	422780000	467740000	329780000	401890000	360240000	418110000
Q9WV68	Peroxisomal 2,4-dienoyl-CoA reductase	Decr2	12	14639000	49835000	19878000	47312000	12486000	17479000	21406000	12824000	20073000	15897000	17326000	10641000	48027000	24328000	25385000	20530000
Q8C0C7	Phenylalanine--tRNA ligase alpha subunit	Farsa	12	4888500	11914000	6121500	10344000	7526700	5603500	5942000	6134100	3624200	4160000	3972700	4874600	11110000	5679100	4789700	3018200
P53810	Phosphatidylinositol transfer protein alpha isoform	Pitpna	12	24801000	10303000	21322000	12257000	22590000	20298000	17266000	23179000	18509000	21777000	21057000	23243000	11948000	19390000	20141000	21760000
P63005	Platelet-activating factor acetylhydrolase IB subunit alpha	Pafah1b1	12	12075000	6990000	11558000	7623200	13443000	11894000	10424000	14449000	12774000	12848000	12769000	15812000	8077100	11272000	10876000	13821000
Q91VA6	Polymerase delta-interacting protein 2	Poldip2	12	13692000	10460000	14761000	10501000	15760000	16414000	15503000	11865000	13414000	13560000	15080000	15004000	10626000	15906000	12928000	13872000
Q8K1R3	Polyribonucleotide nucleotidyltransferase 1, mitochondrial	Pnpt1	12	6461000	5214500	6435400	5190300	7527000	6993500	7367800	6163900	6781700	8257600	7085500	8390100	5604000	6957700	6718100	7710100
O35129	Prohibitin-2	Phb2	12	27763000	66368000	28532000	65150000	16689000	33106000	27122000	29021000	12835000	10075000	13055000	12805000	48209000	26878000	42405000	40345000
Q9Z2Y8	Proline synthase co-transcribed bacterial homolog protein	Prosc	12	86751000	43755000	78321000	47723000	108550000	81995000	72441000	102800000	73899000	89798000	87690000	92617000	46892000	73089000	83349000	82965000
P97372	Proteasome activator complex subunit 2	Psme2	12	34610000	31664000	36071000	29525000	31752000	34434000	44153000	30791000	32023000	34631000	41602000	27363000	36739000	34256000	36024000	27426000
P49722	Proteasome subunit alpha type-2	Psma2	12	110590000	53681000	119100000	60986000	120670000	106880000	106800000	118440000	85751000	99372000	112420000	111270000	62704000	107680000	114160000	117360000
Q9QUM9	Proteasome subunit alpha type-6	Psma6	12	142790000	78847000	140500000	78123000	150090000	135080000	107880000	157460000	110090000	131580000	127110000	139160000	83317000	116610000	120350000	148580000
Q921X9	Protein disulfide-isomerase A5	Pdia5	12	776340	34436000	1494400	24611000	350540	1590500	2723200	1167700	5307300	1530500	802100	1279300	23844000	2527100	4943500	1097100
O55125	Protein NipSnap homolog 1	Nipsnap1	12	190590000	176050000	228690000	184560000	228720000	193820000	189860000	159210000	171870000	213960000	209490000	189950000	178160000	253050000	198260000	198200000
Q8K183	Pyridoxal kinase	Pdxk	12	66336000	32319000	59585000	36899000	92996000	63011000	67308000	97727000	66630000	66905000	81346000	80315000	38542000	71206000	72110000	83652000
P46638	Ras-related protein Rab-11B;Ras-related protein Rab-11A	Rab11b;Rab11a	12	91630000	46161000	86486000	51311000	90879000	93555000	79238000	89693000	83176000	84853000	83110000	96699000	49051000	83126000	79073000	87794000
A0A0R4J069	Selenocysteine lyase	Scly	12	23092000	16375000	22821000	18555000	24860000	22095000	27103000	22684000	22868000	20744000	23155000	20002000	18676000	23488000	24509000	22273000
Q9D8U8	Sorting nexin-5	Snx5	12	17336000	10737000	15369000	12289000	17326000	14697000	15111000	15514000	16113000	16524000	15939000	19601000	11111000	13832000	13312000	15217000
Q9CQA3	Succinate dehydrogenase [ubiquinone] iron-sulfur subunit, mitochondrial	Sdhb	12	230650000	151390000	254800000	159270000	273860000	274610000	224620000	232120000	225310000	273320000	254510000	246840000	143030000	234210000	256430000	276570000
A0A0R4J1Y7	Thioredoxin domain-containing protein 5	Txndc5	12	36502000	39297000	50150000	40245000	22765000	26641000	38609000	30940000	34064000	27174000	25967000	23959000	29225000	37043000	30943000	28478000
Q64737	Trifunctional purine biosynthetic protein adenosine-3;Phosphoribosylamine--glycine ligase;Phosphoribosylformylglycinamidine cyclo-ligase;Phosphoribosylglycinamide formyltransferase	Gart	12	1522600	8567800	884510	4753100	719440	1023600	1710700	2917300	3724900	3509100	2740600	3455600	8057900	2883900	2519800	1223300
Q8R059	UDP-glucose 4-epimerase	Gale	12	6938200	6907800	8699100	6312700	9455100	7241200	8992500	10120000	8842800	8423900	8911500	8409200	8781000	9180900	9623700	11493000
Q64435	UDP-glucuronosyltransferase 1-6	Ugt1a6	12	4672500	70772000	8333800	60805000	2338200	10126000	12809000	6103600	15293000	7721800	7492800	6396900	60010000	17894000	10415000	6853100
Q11136	Xaa-Pro dipeptidase	Pepd	12	17196000	9015000	16567000	9717500	22392000	16487000	16691000	22601000	16557000	17292000	15703000	18497000	9358200	14596000	15022000	16801000
Q3TNA1	Xylulose kinase	Xylb	12	10614000	27255000	15036000	29399000	7855900	12155000	12066000	7088000	14624000	10627000	11122000	7530500	24657000	11489000	12422000	9607300
Q91XH5	Sepiapterin reductase	Spr	12	67217000	79968000	76816000	72024000	90768000	54107000	51120000	83249000	41605000	90210000	56311000	88083000	76406000	60973000	45881000	50731000
P63101	14-3-3 protein zeta/delta	Ywhaz	11	99164000	77611000	103310000	79188000	96782000	119850000	112950000	106320000	130760000	135460000	131570000	119830000	83519000	108230000	97167000	120880000
Q60991	25-hydroxycholesterol 7-alpha-hydroxylase	Cyp7b1	11	103804	10031000	67047.2	4227400	157966	125371	2811500	147941	10150000	1684600	526850	2288600	27611000	959750	336790	152277
F6YVP7	40S ribosomal protein S18	Gm10260;Rps18	11	157920000	89632000	147580000	96062000	148700000	188110000	142030000	197030000	164610000	167360000	170170000	189250000	104230000	134490000	127370000	182100000
Q9CXW4	60S ribosomal protein L11	Rpl11	11	93603000	92265000	97621000	85277000	107090000	118540000	95798000	125130000	105480000	110140000	97075000	115590000	87822000	79173000	70954000	103350000
P47962	60S ribosomal protein L5	Rpl5	11	61764000	35235000	51454000	38222000	44150000	56915000	53901000	71109000	65728000	54286000	61466000	74326000	43296000	40876000	57317000	63612000
P47911	60S ribosomal protein L6	Rpl6	11	87524000	86980000	64267000	88322000	58670000	53743000	80670000	72868000	91807000	54948000	81418000	80412000	87452000	48975000	52228000	53726000
Q9WV54	Acid ceramidase;Acid ceramidase subunit alpha;Acid ceramidase subunit beta	Asah1	11	38257000	17938000	32172000	19064000	41752000	30375000	36909000	34914000	49552000	47176000	40047000	48769000	19616000	36968000	39448000	32223000
P46664	Adenylosuccinate synthetase isozyme 2	Adss	11	10483000	9204800	9624000	9580200	692750	9875100	12200000	5417200	12482000	8850400	11311000	9367600	9115700	11161000	14106000	12381000
Q8K157	Aldose 1-epimerase	Galm	11	141230000	75738000	107030000	73385000	138770000	107330000	91926000	136950000	82556000	87593000	95101000	87951000	76151000	99578000	102730000	100140000
Q5SVG5	AP-1 complex subunit beta-1	Ap1b1	11	2530900	16308000	2150500	14828000	1087700	2205700	3640200	2123100	3592900	2923800	2017300	1896800	14386000	2124900	2571700	1027000
E9PYT3	Atlastin-3	Atl3	11	103804	21046000	60977	11864000	157966	106730	130610	147941	435300	206850	143516	134110	14163000	145600	190920	152277
Q9CQQ7	ATP synthase F(0) complex subunit B1, mitochondrial	Atp5f1	11	21336000	79439000	24090000	64506000	18767000	26153000	28219000	16398000	29531000	28591000	26711000	18919000	70950000	36830000	32835000	23049000
Q8C2Q8	ATP synthase subunit gamma;ATP synthase subunit gamma, mitochondrial	Atp5c1	11	14805000	121990000	13774000	109530000	9678400	20297000	21883000	12914000	25542000	14119000	15591000	14246000	99711000	23685000	23394000	14571000
P12382	ATP-dependent 6-phosphofructokinase, liver type	Pfkl	11	4662200	6799800	4375700	6260900	3714700	5423700	6020000	4530200	5551200	4390900	3295900	3116000	5514200	6720000	7601700	5622000
Q01339	Beta-2-glycoprotein 1	Apoh	11	20543000	8861700	17478000	9838800	16723000	17164000	12746000	16205000	14658000	14021000	13772000	16188000	8417100	14372000	12166000	14737000
P23780	Beta-galactosidase	Glb1	11	25152000	11502000	19763000	12615000	28148000	20490000	16347000	26518000	21635000	19102000	19435000	25868000	10933000	23181000	21879000	23593000
Q99KR3	Beta-lactamase-like protein 2	Lactb2	11	93689000	49795000	78235000	53627000	102480000	84378000	86102000	127570000	73679000	73951000	92631000	82605000	56542000	75316000	99609000	109550000
Q3UW64	Bifunctional UDP-N-acetylglucosamine 2-epimerase/N-acetylmannosamine kinase;UDP-N-acetylglucosamine 2-epimerase (hydrolyzing);N-acetylmannosamine kinase	Gne	11	407760	12558000	346510	5176300	389370	1445800	1572500	810580	2560300	1261500	988830	817140	12480000	1769300	1493100	1047100
O35350	Calpain-1 catalytic subunit	Capn1	11	8145000	5691900	10174000	5962900	5843200	8291600	9456700	8036900	6991900	7692000	7623500	9371600	6057500	7607100	7039000	7615400
A0A0A6YX73	cAMP-dependent protein kinase type II-alpha regulatory subunit	Prkar2a	11	7119500	8352300	8795000	8135600	5506600	7761400	9533000	5752200	7541800	7490700	7685200	6305100	8762200	8035700	7840400	6649400
Q8VI47	Canalicular multispecific organic anion transporter 1	Abcc2	11	103804	12214000	67047.2	10161000	157966	125371	124630	147941	544510	116128	143516	134110	4540400	135792	113190	152277
A0A0R4J015	Canalicular multispecific organic anion transporter 2	Abcc3	11	103804	6571100	3202000	15009000	157966	125371	2895100	147941	159978	2860500	143516	1850800	4667700	2758500	113190	2598300
O35744	Chitinase-like protein 3	Chil3	11	14470000	9014700	11790000	11787000	5793300	3926900	5159400	5530600	43993000	20832000	31710000	43581000	380240	5039600	3342900	3869600
Q8BT60	Copine-3	Cpne3	11	22973000	12653000	19514000	12259000	21731000	18634000	19581000	22553000	20140000	18332000	19019000	20041000	10069000	15301000	19287000	21224000
Q6P8J7	Creatine kinase S-type, mitochondrial	Ckmt2	11	103804	211200	67047.2	235301	157966	125371	124630	147941	159978	116128	143516	134110	182460	135792	113190	152277
Q9D0M3	Cytochrome c1, heme protein, mitochondrial	Cyc1	11	182070000	118390000	157980000	115440000	142430000	168440000	151060000	143420000	147440000	110420000	153020000	153770000	103360000	145730000	201690000	201710000
Q91W64	Cytochrome P450 2C70	Cyp2c70	11	4193100	7238700	4013900	7183900	6358100	4078700	11734000	6971100	8226400	7397900	5916500	6363400	12465000	9290600	8072100	4507700
O35215	D-dopachrome decarboxylase	Ddt	11	1553500000	721860000	1415500000	789270000	2135400000	1465200000	1108600000	1766300000	1097800000	1717200000	1459300000	1410100000	835570000	1396900000	1421600000	1600700000
Q99M87	DnaJ homolog subfamily A member 3, mitochondrial	Dnaja3	11	7482800	6950500	8380600	7841000	8438100	8289600	9482900	6907700	8177300	8045700	8665800	7524800	8850200	9010600	8652800	7921500
Q99KJ8	Dynactin subunit 2	Dctn2	11	14356000	10082000	14369000	10594000	14719000	14107000	13896000	12086000	12656000	13978000	12134000	12825000	11092000	12495000	13503000	13095000
Q3TQC7	Ectonucleoside triphosphate diphosphohydrolase 5	Entpd5	11	16983000	40771000	25222000	40968000	11512000	14491000	16176000	13452000	10519000	12049000	16004000	10744000	29105000	13905000	12082000	11773000
Q80T06	Elongation factor 1-delta	Eef1d	11	75480000	71794000	61934000	74291000	55753000	90865000	103000000	69416000	114040000	76232000	88907000	90444000	71846000	79904000	88364000	89597000
P50171	Estradiol 17-beta-dehydrogenase 8	Hsd17b8;H2-Ke6	11	36099000	36668000	49327000	36130000	43275000	42046000	43515000	35624000	44057000	43507000	45045000	41577000	34454000	43186000	35545000	41969000
Q9D9V3	Ethylmalonyl-CoA decarboxylase	Echdc1	11	11953000	17250000	14351000	15335000	13235000	13342000	15749000	10416000	14357000	14548000	15288000	10364000	18847000	13218000	15347000	14203000
P47757-2	F-actin-capping protein subunit beta	Capzb	11	17620000	19184000	16832000	16501000	13572000	21496000	18987000	15412000	18585000	21701000	18682000	17623000	20084000	16817000	23220000	20112000
Q3U0V1	Far upstream element-binding protein 2	Khsrp	11	10049000	7985000	7793300	8077700	7610100	7313200	7764200	10171000	8135800	8516300	7426700	7577600	7094300	7593400	8357600	7785700
P23591	GDP-L-fucose synthase	Tsta3	11	8061100	10659000	11457000	11315000	12634000	13072000	19578000	6869400	18596000	15374000	14088000	13554000	11625000	20573000	17274000	16402000
Q9DCM2	Glutathione S-transferase kappa 1	Gstk1	11	108460000	93631000	101800000	107750000	88875000	71309000	56424000	115300000	57037000	77564000	58349000	62879000	90415000	68460000	68972000	73237000
Q64471	Glutathione S-transferase theta-1	Gstt1	11	19155000	64768000	18960000	59750000	13554000	28941000	21457000	15762000	25177000	18383000	19761000	14206000	53883000	26503000	30403000	24429000
P62827	GTP-binding nuclear protein Ran	Ran;1700009N14Rik	11	58826000	49648000	52216000	48310000	71942000	61067000	50844000	91759000	64270000	64866000	65006000	76284000	47848000	51139000	51608000	51097000
Q99JZ4	GTP-binding protein SAR1a	Sar1a	11	124860000	88707000	134780000	95945000	126450000	125550000	128170000	128360000	118300000	138670000	117400000	120020000	102940000	146650000	109700000	122920000
Q9CYW4	Haloacid dehalogenase-like hydrolase domain-containing protein 3	Hdhd3	11	41288000	20265000	33003000	23394000	60735000	35277000	35861000	49157000	36873000	31363000	41162000	48481000	21177000	33622000	37788000	40062000
A0A0J9YUD8	High mobility group protein B1	Hmgb1	11	135300000	59096000	97793000	66693000	109640000	131950000	85760000	135880000	111100000	136680000	126700000	144290000	72298000	109230000	126460000	133810000
F8WJK8	Hsc70-interacting protein	St13	11	87415000	47712000	68530000	51295000	69176000	72339000	63644000	93970000	69882000	69722000	71259000	77446000	52282000	66843000	76946000	76814000
P00493	Hypoxanthine-guanine phosphoribosyltransferase	Hprt1	11	57384000	28991000	64019000	29293000	60518000	43987000	42804000	51999000	32559000	43133000	43818000	45677000	28391000	40002000	49418000	47482000
A0A075B5P3	Immunoglobulin gamma-2B chain C region	Ighg2b;Igh-3	11	23862000	11658000	30367000	11124000	9683000	22388000	12376000	8994000	35394000	72087000	23513000	69529000	8356300	12653000	12632000	8498100
Q8R0V5	Indoleamine 2,3-dioxygenase 2	Ido2	11	2611300	13543000	1014400	12322000	3500700	4164900	5794400	2293900	4931700	4335200	2656100	2645300	14539000	3502500	3295400	2183300
Q91V64	Isochorismatase domain-containing protein 1	Isoc1	11	41776000	29446000	40152000	27802000	39406000	26814000	31320000	38683000	28544000	26558000	31999000	25473000	32061000	33820000	25210000	30788000
P85094	Isochorismatase domain-containing protein 2A, mitochondrial	Isoc2a	11	170310000	113450000	216580000	125920000	343410000	183380000	232350000	258030000	204870000	243500000	264410000	238400000	157730000	260770000	187080000	210400000
P21619	Lamin-B2	Lmnb2	11	6113400	6796300	5811300	6849700	1927300	5742900	5050700	4015900	6916600	4901100	4579400	3856200	6292900	7221200	5244700	5412500
Q9EP75	Leukotriene-B4 omega-hydroxylase 3	Cyp4f14	11	663740	20760000	635160	18079000	157966	1361900	3542800	1150300	2906500	2929000	989770	836250	20137000	3920600	2178400	541430
Q91X52	L-xylulose reductase	Dcxr	11	40083000	28763000	32259000	29992000	41247000	30266000	25677000	44201000	30097000	29049000	31582000	26927000	31990000	28610000	25848000	31332000
Q5FW60	Major urinary protein 20	Mup20	11	158250000	100180000	132230000	74295000	307860000	150020000	238430000	273810000	258910000	284540000	149110000	495130000	105700000	241170000	149860000	202220000
P14152	Malate dehydrogenase, cytoplasmic	Mdh1	11	424620000	406470000	573830000	404110000	527670000	512090000	669010000	543330000	459420000	516060000	519450000	439840000	448970000	691590000	591830000	602340000
Q80ZP8	Mesencephalic astrocyte-derived neurotrophic factor	Manf	11	31268000	15504000	26058000	17790000	38923000	30746000	34488000	45039000	44441000	42772000	32160000	52192000	18349000	28521000	32045000	34464000
Q99LB6	Methionine adenosyltransferase 2 subunit beta	Mat2b	11	16046000	11483000	16761000	9261400	22973000	18204000	13582000	19621000	15457000	17041000	18361000	19371000	12148000	18431000	17221000	17915000
Q8BP48	Methionine aminopeptidase 1	Metap1	11	16625000	9338000	20381000	10587000	17888000	14393000	14884000	16629000	13398000	16098000	14542000	15711000	8846300	14525000	13467000	15843000
Q9CR62	Mitochondrial 2-oxoglutarate/malate carrier protein	Slc25a11	11	231430	30310000	322460	20559000	51983	693820	1555700	790860	1286600	251610	63270	364190	18913000	1313400	1285100	451330
Q9CZW5	Mitochondrial import receptor subunit TOM70	Tomm70a	11	4498600	11027000	5067300	10196000	4163500	7535500	6752900	3860900	8806700	6676800	5749800	5558900	9480700	7025300	5351800	5839700
Q9D6Y7-2	Mitochondrial peptide methionine sulfoxide reductase	Msra	11	245170000	128630000	231580000	137160000	249430000	210560000	159770000	227740000	155710000	164030000	192980000	203330000	123270000	167740000	203730000	227630000
Q8BG51	Mitochondrial Rho GTPase 1	Rhot1	11	9125500	6508600	8073600	5897800	10843000	6873100	7466000	7020300	5885200	6576200	7528800	6594400	6042100	7295300	8570700	7352600
Q8K2C6	NAD-dependent protein deacylase sirtuin-5, mitochondrial	Sirt5	11	15212000	8026700	13837000	9489700	17609000	13746000	11109000	16516000	11756000	11547000	14144000	14818000	9239300	10290000	13829000	14993000
Q9D6J6	NADH dehydrogenase [ubiquinone] flavoprotein 2, mitochondrial	Ndufv2	11	46011000	27878000	44766000	27409000	34200000	44006000	45898000	39465000	30157000	17924000	29332000	28890000	20220000	34253000	54253000	59328000
Q9DCT2	NADH dehydrogenase [ubiquinone] iron-sulfur protein 3, mitochondrial	Ndufs3	11	59911000	52402000	54164000	50492000	42474000	55872000	73049000	45627000	52172000	32875000	42326000	37055000	45424000	58402000	82385000	75026000
Q61578	NADPH:adrenodoxin oxidoreductase, mitochondrial	Fdxr	11	4345600	6200500	2546300	5776000	6962700	4324400	5398800	4715000	4507000	4515100	4723200	2886800	6474000	6057200	5287600	4778900
O35685	Nuclear migration protein nudC	Nudc	11	18117000	7770200	13600000	9754600	18494000	16908000	14896000	20156000	16478000	16734000	16998000	19405000	9909400	15782000	17137000	18992000
F8VQ28	Paxillin	Pxn	11	4926900	3396800	4751000	3258000	4645300	5219100	4726700	4064000	4585700	4877600	5036900	4880500	4783200	4372900	4342200	4341100
O70400	PDZ and LIM domain protein 1	Pdlim1	11	13660000	9862100	14065000	8892400	18821000	14642000	13385000	16598000	15373000	16726000	14948000	16566000	9376000	11331000	15733000	13190000
Q9DBG5	Perilipin-3	Plin3	11	4496100	6700200	5478300	6576500	1024300	4803100	5141500	3604300	5109400	5815400	5072400	4285100	6206400	4797800	5818400	5151400
Q8VCI5	Peroxisomal biogenesis factor 19	Pex19	11	12066000	7118600	10874000	8178700	7846900	9600500	7290900	9736300	7950800	6840600	9536000	8649100	6423500	6981400	10193000	10002000
Q9DCM0	Persulfide dioxygenase ETHE1, mitochondrial	Ethe1	11	133790000	77514000	136230000	73361000	211890000	155770000	121830000	172940000	98935000	135290000	146470000	117790000	60029000	128970000	154980000	182760000
Q9DCG6	Phenazine biosynthesis-like domain-containing protein 1	Pbld1	11	156520000	75919000	147710000	85285000	165640000	127650000	112050000	165210000	108190000	114140000	146390000	137630000	86323000	140040000	133420000	151570000
Q7M6Y3-2	Phosphatidylinositol-binding clathrin assembly protein	Picalm	11	1896000	15045000	1802400	13131000	542170	3841000	2758800	2220700	4854700	2325900	2014200	2996300	11473000	2766600	3562200	1891400
B1AT82	Phosphoribosyl pyrophosphate synthase-associated protein 1	Prpsap1	11	22153000	13481000	21903000	14186000	20271000	17690000	19886000	17975000	14734000	15864000	16976000	15864000	14060000	21085000	20098000	19267000
P22907-2	Porphobilinogen deaminase	Hmbs	11	17030000	9051500	17715000	10008000	23741000	18068000	17714000	20620000	16425000	16739000	19764000	18632000	11198000	16286000	19567000	18689000
Q8VCZ9	Probable proline dehydrogenase 2	Prodh2	11	4200200	10152000	4606400	10346000	3602300	6244600	5765200	2796400	6115100	4672800	4937700	3732700	9692400	5576800	5065600	5052500
Q9R1P0	Proteasome subunit alpha type-4;Proteasome subunit alpha type	Psma4	11	121670000	56509000	129070000	65624000	137140000	108280000	92698000	125600000	91854000	128680000	130600000	129470000	65157000	125450000	104440000	122120000
O09061	Proteasome subunit beta type-1	Psmb1	11	94609000	49262000	91456000	51152000	94223000	81830000	79534000	89873000	67554000	82768000	88257000	81825000	50460000	82288000	94809000	92091000
Q9QXT0	Protein canopy homolog 2	Cnpy2	11	78328000	39902000	64645000	43788000	78158000	80191000	64844000	99417000	74241000	80422000	72240000	92746000	42584000	66275000	60071000	79032000
Q99LX0	Protein deglycase DJ-1	Park7	11	193310000	127970000	214840000	139250000	224470000	167850000	156250000	206870000	142350000	158820000	168970000	172230000	122310000	166070000	133050000	169640000
Q3UM45	Protein phosphatase 1 regulatory subunit 7	Ppp1r7	11	17321000	9854500	17833000	10558000	20475000	16272000	18521000	17942000	14802000	18432000	17695000	17312000	12537000	17783000	17159000	16990000
A0A0R4J293	Protein-glutamine gamma-glutamyltransferase K	Tgm1	11	7753400	6600300	7426700	5417700	12370000	9096100	10429000	10889000	13915000	10269000	8104900	13747000	7911200	12635000	10753000	8715000
Q3TCN2	Putative phospholipase B-like 2;Putative phospholipase B-like 2 28 kDa form;Putative phospholipase B-like 2 40 kDa form;Putative phospholipase B-like 2 15 kDa form	Plbd2	11	25860000	13638000	25811000	15109000	35602000	24009000	23429000	26382000	23518000	23636000	22227000	26869000	13211000	29218000	22726000	23089000
Q91XF0	Pyridoxine-5-phosphate oxidase	Pnpo	11	67390000	34296000	56559000	37264000	80023000	67426000	59293000	85949000	78020000	71691000	71810000	90011000	40340000	55434000	71457000	72494000
P50396	Rab GDP dissociation inhibitor alpha	Gdi1	11	7649600	10614000	10441000	9316300	6630000	8277100	11740000	6947600	9806500	10979000	10285000	9443700	11335000	11427000	9928000	10015000
P35293	Ras-related protein Rab-18	Rab18	11	23809000	20784000	27276000	21133000	21412000	22132000	20829000	17296000	17224000	17388000	15805000	14894000	18524000	22885000	20993000	20364000
P53994	Ras-related protein Rab-2A;Ras-related protein Rab-2B	Rab2a;Rab2b	11	29675000	20462000	25784000	21673000	31727000	27762000	23265000	31323000	22239000	26130000	20971000	25296000	22517000	30775000	30166000	25783000
Q99PT1	Rho GDP-dissociation inhibitor 1	Arhgdia	11	103250000	54182000	102270000	54994000	142920000	111620000	105550000	154530000	125690000	161190000	131340000	157060000	61714000	126630000	115990000	120610000
Q3TMH2	Secernin-3	Scrn3	11	30096000	16281000	33684000	16910000	37405000	25615000	28328000	32297000	21569000	24988000	28632000	27193000	16774000	30260000	29557000	29910000
Q9DBC0	Selenoprotein O	Selenoo	11	1563900	4312400	67047.2	3149700	157966	1184200	866170	147941	1655900	1910500	915660	134110	5973700	874410	1687800	152277
P42208	Septin-2	Sept2	11	18123000	11722000	17569000	11855000	18143000	18076000	17559000	16981000	19180000	21910000	17310000	22223000	12151000	17993000	17505000	16903000
Q8R238	Serine dehydratase-like	Sdsl	11	4893400	3763000	5305700	3522700	6317600	4868800	5774100	5010000	5074900	12963000	5192000	5316200	3791900	7324900	5565100	5369700
P63330	Serine/threonine-protein phosphatase 2A catalytic subunit alpha isoform	Ppp2ca	11	58836000	27847000	57807000	28948000	57334000	45565000	51959000	56455000	41422000	48387000	42323000	54949000	29330000	54264000	53064000	50185000
Q8BFS6	Serine/threonine-protein phosphatase CPPED1	Cpped1	11	15340000	9459600	15929000	10174000	16975000	15414000	13944000	17931000	12986000	16251000	16619000	16028000	9587500	13613000	16579000	14216000
P14576	Signal recognition particle 54 kDa protein	Srp54;Srp54c	11	5234100	7857700	7054200	9312200	5204800	6397800	9020800	4663400	7817300	6850200	6037800	5738000	8710500	7230700	8122300	5063400
Q91WK1	SPRY domain-containing protein 4	Spryd4	11	29050000	16551000	24659000	15834000	36511000	25367000	20707000	39301000	26506000	31289000	28977000	34206000	18249000	23137000	22051000	24643000
Q9R112	Sulfide:quinone oxidoreductase, mitochondrial	Sqrdl	11	362550	16501000	489650	14380000	157966	605110	1550000	636370	1996400	1115700	143516	477800	12735000	1511600	994410	587810
P09671	Superoxide dismutase [Mn], mitochondrial	Sod2	11	550990000	286620000	457940000	316900000	704150000	551090000	410110000	555720000	439890000	420230000	520120000	509840000	235120000	444090000	460570000	545840000
Q9R099	Transducin beta-like protein 2	Tbl2	11	14276000	9188900	12221000	9113300	12040000	12680000	12423000	14101000	13868000	10940000	11500000	15561000	9199900	9549000	11583000	12693000
C5NSA7	Tryptophan 2,3-dioxygenase	Tdo2	11	2555600	17852000	2505700	10947000	157966	2747800	3795900	1768600	5141900	4516100	3441600	3556700	18056000	3259200	2660000	1936800
Q6P4T2	U5 small nuclear ribonucleoprotein 200 kDa helicase	Snrnp200	11	10786000	33653000	6606400	8796300	2610200	6855600	8373600	8728400	7163200	3701100	6373300	4780800	27291000	6768900	4654100	8024800
E9Q5K4	Cytochrome P450 2C44	Cyp2c44	11	89460	18652000	286330	12941000	119670	661890	1386500	435670	2058900	1477800	572750	397650	13426000	1646300	1894700	506890
Q9JKY7	Cytochrome P450	Cyp2d22	11	7150300	43840000	8351200	40946000	6877000	9113300	15757000	6890800	12369000	9465500	7971400	6527200	43803000	15077000	10197000	6157000
P0DP28	Calmodulin-3	Calm3	11	522470000	230740000	426160000	247490000	682900000	477820000	413400000	532390000	482910000	509110000	471590000	611380000	268970000	400520000	431830000	438850000
Q8BJY1	26S proteasome non-ATPase regulatory subunit 5	Psmd5	10	103804	4714300	107700	7544200	157966	125371	43524	147941	159978	116128	143516	134110	7865100	135792	246650	34054
G3X9M0	28S ribosomal protein S29, mitochondrial	Dap3	10	9955700	6482300	10009000	7723100	9237000	9595800	9252900	8700600	7377700	11340000	8392400	9119300	8124500	10301000	9276600	9971400
Q9D404	3-oxoacyl-[acyl-carrier-protein] synthase, mitochondrial	Oxsm	10	7500800	8575000	8546300	8497500	7681800	9002200	10634000	7040100	10196000	8534000	11407000	8181400	8481800	9566300	9101600	9250100
A0A1B0GRR3	40S ribosomal protein S11	Rps11	10	24066000	26262000	19874000	27627000	23467000	14847000	22163000	27612000	29318000	22711000	27864000	30278000	27076000	15906000	16085000	21626000
Q9CQ60	6-phosphogluconolactonase	Pgls	10	7381200	24111000	7252000	21715000	6890300	8683500	13893000	7172800	11801000	8034400	7031700	5322800	23969000	11629000	11450000	7546400
Q8BP56	Acid trehalase-like protein 1	Athl1	10	6478400	3369000	6717900	3881900	7626400	5482100	4812500	6287100	4540800	5073000	6241200	5454300	3868600	5683300	5265800	5529200
Q14DH7	Acyl-CoA synthetase short-chain family member 3, mitochondrial	Acss3	10	2028100	23349000	5334700	11731000	157966	2229300	1608900	147941	159978	116128	1987100	134110	4643100	4006400	2459300	1707500
P29699	Alpha-2-HS-glycoprotein	Ahsg	10	37859000	23668000	29440000	26664000	39474000	45126000	35295000	45343000	62071000	58408000	40361000	49449000	30284000	36433000	35109000	35216000
Q9D0I9	Arginine--tRNA ligase, cytoplasmic	Rars	10	103804	17349000	28015	7153500	157966	121760	152030	147941	706830	116128	25089	134110	7882400	180430	133890	152277
Q9DB20	ATP synthase subunit O, mitochondrial	Atp5o	10	77234000	166700000	78787000	146890000	79974000	85320000	76085000	62625000	75693000	76357000	59505000	59331000	153100000	104690000	82044000	75773000
Q61335	B-cell receptor-associated protein 31	Bcap31	10	8352100	12280000	7332900	10187000	4206400	8870000	6698800	6398500	6045700	4071400	5496600	5087500	7475600	6977000	8535100	13453000
P20060	Beta-hexosaminidase subunit beta	Hexb	10	9362400	5392800	9060500	6019100	11830000	9722100	7266200	9580100	10112000	13395000	10331000	11309000	4591200	8303700	7460700	8900700
P15327	Bisphosphoglycerate mutase;Phosphoglycerate mutase	Bpgm	10	22236000	8456300	17311000	8037800	20555000	37664000	15689000	24331000	24705000	18141000	13797000	18001000	10673000	13720000	10819000	15951000
P61022	Calcineurin B homologous protein 1	Chp1	10	20416000	11226000	19943000	12432000	15169000	17100000	14296000	17691000	13370000	16051000	16635000	17255000	10057000	14571000	12904000	15105000
A0A0R4IZW8	Calpain small subunit 1	Capns1	10	9101400	6875500	8705000	7187900	5016800	7727000	6241000	6985700	7924500	6549200	7793400	7350200	7640600	6597100	6916000	7721800
P23589	Carbonic anhydrase 5A, mitochondrial	Ca5a	10	47240000	25745000	39909000	27035000	58260000	43571000	32927000	48366000	30695000	32183000	41719000	34558000	24403000	31742000	40649000	40489000
E9PV38	Carboxylic ester hydrolase	Ces2g	10	26038000	18900000	27568000	18739000	21819000	20886000	23517000	31259000	19204000	15502000	22536000	21581000	16277000	21167000	24223000	19467000
Q9WVJ3	Carboxypeptidase Q	Cpq	10	59817000	27267000	45188000	27816000	75336000	51134000	38806000	58802000	41297000	37419000	52715000	50944000	25737000	50534000	50640000	52780000
P10605	Cathepsin B;Cathepsin B light chain;Cathepsin B heavy chain	Ctsb	10	234330000	130490000	168270000	137840000	238040000	218280000	130930000	214150000	201370000	229950000	217470000	251080000	107300000	158650000	128820000	205010000
Q5SUH7	Clathrin interactor 1	Clint1	10	3357400	4319500	3873100	4256000	2760700	4773900	4454900	3366700	4978000	4363000	3830600	4618800	4762700	3497200	3589100	4340300
Q9D024	Coiled-coil domain-containing protein 47	Ccdc47	10	2122000	4878300	2554900	4958200	1935700	5017900	3875000	2773300	5090100	4129500	4246200	4112400	5092300	3668500	2701800	3866500
Q61419	Cytidine monophosphate-N-acetylneuraminic acid hydroxylase	Cmah	10	6737000	5400700	5264700	5684800	2688700	8263900	7836500	11108000	8701900	10076000	9521100	13284000	6937400	7526300	7239700	10443000
P19783	Cytochrome c oxidase subunit 4 isoform 1, mitochondrial	Cox4i1	10	136930000	108360000	134250000	104570000	85564000	126850000	128550000	107770000	92875000	50020000	93007000	78575000	84366000	84711000	159620000	226580000
P12787	Cytochrome c oxidase subunit 5A, mitochondrial	Cox5a	10	237370000	118140000	237610000	117990000	187360000	216260000	200370000	197050000	131470000	91450000	158380000	153180000	100560000	143450000	301370000	333840000
Q91WL5	Cytochrome P450 4A12A	Cyp4a12a;Cyp4a12b	10	74694	16881000	41982	4065400	157966	378080	671190	145270	898940	124090	195050	214660	12766000	338350	468250	182590
Q9R0P5	Destrin	Dstn	10	14478000	34195000	19248000	32865000	14851000	22138000	25946000	14777000	33333000	31075000	22089000	22534000	36875000	30810000	25959000	22759000
P28352	DNA-(apurinic or apyrimidinic site) lyase;DNA-(apurinic or apyrimidinic site) lyase, mitochondrial	Apex1	10	19563000	9340300	19872000	10887000	28456000	17167000	18850000	21802000	19687000	28415000	21702000	26867000	10751000	19931000	16466000	20182000
P63037	DnaJ homolog subfamily A member 1	Dnaja1	10	39779000	25231000	31063000	27253000	30408000	36039000	34529000	29380000	28414000	22652000	32279000	31585000	25899000	26252000	42524000	36119000
O54734	Dolichyl-diphosphooligosaccharide--protein glycosyltransferase 48 kDa subunit	Ddost	10	6926800	31803000	9515200	29772000	4520000	8785100	14846000	7484000	12970000	9650300	9244800	8982500	25644000	12484000	11600000	10632000
O08600	Endonuclease G, mitochondrial	Endog	10	33148000	16903000	38798000	16321000	43626000	29001000	44052000	43281000	27284000	43205000	28735000	33013000	18733000	39061000	32820000	29890000
Q9D172	ES1 protein homolog, mitochondrial	D10Jhu81e	10	239880000	125660000	203140000	132140000	293460000	192590000	173900000	232110000	193230000	225770000	205850000	221380000	131280000	207100000	178320000	181070000
Q3UGC7	Eukaryotic translation initiation factor 3 subunit J-A;Eukaryotic translation initiation factor 3 subunit J-B	Eif3j1;Eif3j2	10	27109000	15524000	25261000	16819000	29251000	25730000	25379000	29338000	25020000	27079000	27344000	27286000	17393000	22948000	26992000	30797000
Q9ERK4	Exportin-2	Cse1l	10	554940	38026000	412540	30139000	3929800	837290	2524700	4149900	2950900	799940	831390	3769100	41364000	738990	1606400	3913600
Q9QXC1	Fetuin-B	Fetub	10	13091000	6266600	11969000	6805100	18420000	15386000	11900000	17349000	17126000	19801000	14899000	16336000	5989400	14607000	9902100	12186000
A0A0R4J094	Fumarylacetoacetate hydrolase domain-containing protein 2A	Fahd2	10	49733000	31714000	53741000	33358000	52527000	47105000	39604000	45853000	37425000	37165000	47628000	43840000	26171000	44304000	42188000	48507000
P19639	Glutathione S-transferase Mu 3	Gstm3	10	56577000	71468000	100690000	68999000	45750000	54763000	38467000	42583000	52186000	82067000	73970000	45994000	46718000	54086000	56559000	67499000
Q61133	Glutathione S-transferase theta-2	Gstt2	10	14045000	37689000	12194000	32150000	11420000	10553000	10832000	14287000	9364900	12707000	9003700	4236000	27704000	22513000	17719000	12023000
O35969	Guanidinoacetate N-methyltransferase	Gamt	10	4309400	31758000	5770600	28482000	1809500	7904100	12044000	5299700	7401600	8005400	2527700	2765000	31478000	5307600	8655400	6051300
P62880	Guanine nucleotide-binding protein G(I)/G(S)/G(T) subunit beta-2	Gnb2	10	17585000	23245000	23738000	20989000	19774000	17458000	20144000	14195000	22328000	23944000	23536000	22724000	23557000	25601000	19502000	20904000
P01898	H-2 class I histocompatibility antigen, Q10 alpha chain	H2-Q10	10	29686000	21641000	34013000	20221000	24855000	32593000	23746000	28412000	26706000	21823000	27254000	27104000	18154000	17579000	26623000	29160000
A0A140T8J4	Heme-binding protein 1	Hebp1	10	141900000	83586000	117620000	94549000	119020000	119100000	109860000	136510000	106700000	95459000	120780000	96660000	77406000	107260000	126770000	114980000
Q5EBP8	Heterogeneous nuclear ribonucleoprotein A1;Heterogeneous nuclear ribonucleoprotein A1, N-terminally processed	Hnrnpa1	10	17509000	14597000	18022000	14667000	16986000	21809000	20446000	20270000	28332000	29903000	26730000	24544000	15792000	20683000	15786000	22265000
Q9Z2X1	Heterogeneous nuclear ribonucleoprotein F;Heterogeneous nuclear ribonucleoprotein F, N-terminally processed	Hnrnpf	10	11800000	25682000	12534000	24869000	9855200	15967000	16286000	11608000	15533000	16797000	11938000	10669000	22513000	16871000	12805000	11686000
Q9Z204-2	Heterogeneous nuclear ribonucleoproteins C1/C2	Hnrnpc	10	38661000	24522000	36028000	24621000	41509000	36082000	42118000	34811000	42732000	49939000	42551000	45862000	27957000	45607000	34383000	38624000
Q9QZ85	Interferon-inducible GTPase 1	Iigp1	10	652320	14009000	751800	7528900	157966	1785900	1761300	651260	1605100	839790	1135000	968120	15025000	1533200	1408800	676900
P70404	Isocitrate dehydrogenase [NAD] subunit gamma 1, mitochondrial	Idh3g	10	10100000	8985800	10812000	9622200	14666000	13619000	10450000	13552000	14341000	12940000	13423000	16162000	8823700	12342000	9570800	12227000
Q8BU30	Isoleucine--tRNA ligase, cytoplasmic	Iars	10	41978	13626000	38177	8107200	55420	125371	124630	82030	30959	30900	143516	134110	558210	42721	18296	152277
Q61029-3	Lamina-associated polypeptide 2, isoforms beta/delta/epsilon/gamma;Lamina-associated polypeptide 2, isoforms alpha/zeta	Tmpo	10	8815200	7238700	8933800	7298200	6784800	10102000	8501200	7518500	9276200	8497000	7588700	10514000	6317200	10052000	9705600	9692400
Q922Q8	Leucine-rich repeat-containing protein 59	Lrrc59	10	124980000	68328000	119820000	69032000	140420000	92650000	121030000	120760000	108870000	94639000	90870000	136550000	76035000	86010000	93589000	97435000
O35114	Lysosome membrane protein 2	Scarb2	10	42446000	21685000	30962000	23553000	48346000	38136000	40871000	33313000	44252000	35993000	41203000	47194000	18993000	44749000	42082000	36210000
O55022	Membrane-associated progesterone receptor component 1	Pgrmc1	10	516020000	253110000	441540000	290440000	428140000	420990000	317450000	378650000	287540000	267750000	318090000	305320000	219640000	316880000	387920000	410770000
A0A0R4J023	Methylglutaconyl-CoA hydratase, mitochondrial	Auh	10	32874000	18164000	27696000	21327000	35700000	35774000	25350000	33730000	30453000	34145000	34705000	38679000	18891000	28666000	31854000	32933000
Q8VCF0	Mitochondrial antiviral-signaling protein	Mavs	10	23570000	26211000	22015000	24216000	27520000	22533000	20148000	19722000	20663000	21656000	21347000	20729000	24735000	17376000	19208000	19471000
Q14CH1	Molybdenum cofactor sulfurase	Mocos	10	6202700	4498900	6146500	4402500	6087200	5374900	6244100	8074300	4830700	3685800	5401400	4027000	5044700	7363100	7707800	6025200
E9Q3B9	Monoglyceride lipase	Mgll	10	10881000	17062000	12326000	23045000	9412400	6308300	8545400	4011200	5515600	2593000	7987400	4435400	12087000	7183700	8506900	7107000
Q91XE4	N-acyl-aromatic-L-amino acid amidohydrolase (carboxylate-forming)	Acy3	10	106360000	54921000	102100000	59326000	125060000	91411000	88756000	122630000	98888000	79218000	95905000	117820000	58280000	87296000	93041000	99146000
Q91X91	Nicotinate-nucleotide pyrophosphorylase [carboxylating]	Qprt	10	47816000	71899000	50050000	66857000	56636000	36365000	74276000	68750000	104640000	72468000	77342000	54320000	95137000	67865000	47737000	53680000
B7ZNL2	Nucleosome assembly protein 1-like 4	Nap1l4	10	16582000	8486100	17413000	10338000	17953000	16049000	15317000	15770000	14750000	17731000	17413000	16473000	10148000	16203000	17489000	16551000
Q3U816	Oxidoreductase HTATIP2	Htatip2	10	22064000	10213000	23070000	11814000	15588000	15044000	12148000	16111000	11887000	16955000	14055000	12213000	7738800	13456000	17590000	14002000
P32848	Parvalbumin alpha	Pvalb	10	2658600	3291200	578420	2922000	246350	3078100	880860	2460900	227480000	2307800	1192500	265870	3209800	3065200	3442300	3659800
Q62446	Peptidyl-prolyl cis-trans isomerase FKBP3	Fkbp3	10	35056000	17311000	31915000	18470000	30359000	36282000	27666000	37914000	32903000	32745000	32264000	41370000	21402000	26792000	29210000	36815000
Q61171	Peroxiredoxin-2	Prdx2	10	203060000	95210000	197910000	100100000	278020000	213790000	170190000	207180000	159620000	189720000	153480000	186540000	106750000	180350000	149870000	169750000
O08807	Peroxiredoxin-4	Prdx4	10	801970000	515730000	671340000	517290000	552320000	631760000	579050000	852660000	622110000	712030000	526650000	658680000	484900000	585460000	738740000	665900000
Q8CHP8	Phosphoglycolate phosphatase	Pgp	10	20460000	10386000	20947000	10676000	23005000	19237000	16440000	19415000	17747000	21407000	19267000	21808000	11450000	16882000	18655000	20143000
Q9Z2M7	Phosphomannomutase 2	Pmm2	10	17741000	14286000	16485000	14723000	16861000	19116000	18795000	17639000	19734000	15172000	15591000	17426000	16019000	18064000	21973000	21914000
Q99PV0	Pre-mRNA-processing-splicing factor 8	Prpf8	10	536850	7648900	468650	5279400	350700	775150	1386500	1393400	1724400	1802000	1220300	623210	7139500	2173800	1467900	112050
Q6PDI5-2	Proteasome-associated protein ECM29 homolog	Ecm29;AI314180	10	103804	2641400	67047.2	2263100	157966	125371	124630	147941	159978	116128	143516	134110	2526400	135792	113190	152277
Q07456	Protein AMBP;Alpha-1-microglobulin;Inter-alpha-trypsin inhibitor light chain;Trypstatin	Ambp	10	15225000	7999300	13045000	8836700	17328000	12849000	12988000	15501000	22484000	25794000	13507000	20789000	7560300	13773000	12048000	14909000
Q80WJ7	Protein LYRIC	Mtdh	10	17025000	11000000	15174000	12021000	17131000	15307000	15485000	12486000	14783000	11986000	13362000	15598000	9715300	11296000	14580000	13606000
Q9CQE1	Protein NipSnap homolog 3B	Nipsnap3b	10	50402000	23803000	52011000	26453000	61812000	42534000	38505000	49404000	40175000	46015000	48777000	56886000	26197000	45081000	41551000	42866000
Q99NF7	Protein phosphatase 1B	Ppm1b	10	17163000	9578100	14686000	8161400	20852000	15251000	11687000	16386000	11925000	14794000	13739000	14828000	10183000	12940000	17391000	17061000
Q9D1M0	Protein SEC13 homolog	Sec13	10	22030000	27292000	27761000	28544000	22592000	28692000	31548000	20954000	30913000	30168000	27079000	27715000	25067000	29988000	24432000	25578000
Q3U2P1	Protein transport protein Sec24A	Sec24a	10	103804	5836700	67047.2	8192000	157966	125371	37480	147941	65949	116128	143516	134110	7416400	22776	49804	152277
Q924D0	Reticulon-4-interacting protein 1, mitochondrial	Rtn4ip1	10	8556600	6544600	8993900	7196200	9556000	7395100	8800100	7074500	7619800	7788200	8939300	6501200	7364800	8035300	8337900	7408600
G3UXL2	Ribose-phosphate pyrophosphokinase 1	Prps1l3;Prps1	10	52369000	30441000	53769000	33244000	49648000	46612000	42939000	48530000	37630000	47173000	45272000	41642000	28898000	52592000	42684000	55515000
A0A3B2WBL1	Ribosomal protein;60S ribosomal protein L10a	Rpl10a	10	55560000	47984000	47933000	47007000	58021000	42690000	33320000	60309000	44329000	50654000	38662000	61090000	61894000	37039000	40886000	51682000
O55143	Sarcoplasmic/endoplasmic reticulum calcium ATPase 2;Sarcoplasmic/endoplasmic reticulum calcium ATPase 1	Atp2a2;Atp2a1	10	103804	11386000	67047.2	6865600	157966	125371	124630	622710	1151300	116128	143516	134110	5790900	135792	320400	152277
P52430	Serum paraoxonase/arylesterase 1	Pon1	10	34111000	46463000	38483000	46315000	31753000	47407000	59388000	30888000	59671000	31165000	43310000	35628000	46297000	44117000	44169000	46328000
Q62087	Serum paraoxonase/lactonase 3	Pon3	10	8369100	16121000	10306000	17319000	6544100	10573000	12274000	6484500	11982000	9470000	10453000	8946800	13826000	11854000	9957800	10791000
Q9CQ65	S-methyl-5-thioadenosine phosphorylase	Mtap	10	27502000	15185000	28291000	14767000	31066000	25219000	24614000	32864000	20885000	25741000	23313000	23323000	14162000	29239000	25942000	24526000
Q8BGH2	Sorting and assembly machinery component 50 homolog	Samm50	10	3555600	7616600	3679000	13965000	2624700	7151200	2439000	3395300	1902900	1048300	1743900	1831900	6434300	2368100	5436100	9250300
Q8K4Z5	Splicing factor 3A subunit 1	Sf3a1	10	5191400	5099600	4479100	5288500	4018500	6585100	5277800	5990100	6841800	7363600	6039600	6736800	6779800	6548500	4578100	5916100
Q921L6	Src substrate cortactin	Cttn	10	24208000	23256000	22699000	24873000	22086000	30826000	24745000	24972000	30279000	30915000	29178000	33059000	21663000	23790000	24306000	30448000
Q8C7E7	Starch-binding domain-containing protein 1	Stbd1	10	15417000	12363000	12279000	11857000	11536000	14306000	10817000	15085000	11106000	17832000	16744000	17877000	8835400	7853200	10113000	9612500
Q62465	Synaptic vesicle membrane protein VAT-1 homolog	Vat1	10	4386200	8340300	5411200	8456800	2826100	4797900	7727000	3024200	8892200	5276600	6422700	4150100	7014100	7820400	5181600	5780600
Q8VHE0	Translocation protein SEC63 homolog	Sec63	10	981600	13062000	67047.2	11248000	157966	1100400	974330	147941	10098000	116128	11310000	134110	73461000	135792	113190	152277
A0A1Y7VJ48	Tubulin-specific chaperone A	Tbca	10	16168000	7249900	14173000	9092400	16310000	13173000	13652000	17563000	12751000	11802000	14226000	15395000	7489500	11182000	14596000	15219000
P54728	UV excision repair protein RAD23 homolog B	Rad23b	10	18654000	15018000	16967000	14112000	18423000	16727000	18631000	21034000	20819000	19315000	19635000	18899000	16535000	16761000	15963000	17623000
Q9CY27	Very-long-chain enoyl-CoA reductase	Tecr	10	30586	37571000	67047.2	32728000	157966	227970	346990	147941	142210	100350	143516	101910	27435000	30020	805260	110680
Q3UE92	Xaa-Pro aminopeptidase 1	Xpnpep1	10	12530000	8714700	13207000	9340900	12557000	14279000	10742000	14937000	11583000	10353000	13033000	11041000	7079200	9628300	13290000	16342000
E9QN99	Abhydrolase domain containing 14b	Abhd14b	10	34576000	122670000	44119000	105740000	32056000	53569000	48059000	29817000	50934000	50494000	37490000	31981000	113700000	62041000	54266000	45269000
E9Q616	AHNAK nucleoprotein (desmoyokin)	Ahnak	10	11641000	7152600	13473000	6606900	12502000	11592000	9763700	12091000	16292000	16782000	8524300	10727000	6022100	10448000	9831700	8355200
K7N6C2	Cytochrome P450, family 2, subfamily c, polypeptide 68	Cyp2c68	10	5482000	13613000	7381800	12175000	5830300	4923600	6857300	3666200	5813200	5188000	5978900	4901800	13117000	7248600	6657800	4477200
A0A0R4J1H2	Glycerate kinase	Glyctk	10	20326000	41717000	22214000	36045000	23293000	19906000	31122000	20600000	29276000	23961000	25143000	18946000	41298000	37167000	25368000	20154000
Q99JT9	1,2-dihydroxy-3-keto-5-methylthiopentene dioxygenase	Adi1	9	26275000	15065000	23675000	15039000	27924000	20743000	22311000	29956000	23185000	25831000	24938000	25695000	13841000	18485000	21791000	23585000
Q9DCT1	1,5-anhydro-D-fructose reductase	Akr1e2;Akr1e1	9	32278000	14984000	28415000	17058000	31256000	25316000	27663000	33534000	22664000	25986000	24833000	26101000	15957000	27698000	28590000	27498000
P61982	14-3-3 protein gamma;14-3-3 protein gamma, N-terminally processed	Ywhag	9	29094000	29172000	39020000	28904000	30143000	38379000	36285000	30778000	38841000	36558000	40012000	37933000	28350000	37950000	32253000	40441000
Q8BVQ9	26S protease regulatory subunit 7	Psmc2	9	564190	14358000	628610	12359000	1342600	3080900	3505000	1386800	4036900	2737600	2598200	2913000	12055000	3358000	2310400	2364400
P26516	26S proteasome non-ATPase regulatory subunit 7	Psmd7	9	17332000	19928000	19462000	21662000	15369000	17810000	22319000	14012000	25683000	20826000	24755000	17108000	22961000	22766000	21667000	18943000
Q9D0G0	28S ribosomal protein S30, mitochondrial	Mrps30	9	4477700	2546800	3931800	4230000	5048000	3976700	4553400	5081100	3414700	4725000	4811100	3596300	3284000	3484400	4313000	4187800
Q8R519	2-amino-3-carboxymuconate-6-semialdehyde decarboxylase	Acmsd	9	2680400	731950	1334100	664690	4734400	2825700	3430400	5599600	5411300	39799000	3803200	6844500	985960	3447900	5356300	4971300
O88986	2-amino-3-ketobutyrate coenzyme A ligase, mitochondrial	Gcat	9	5465900	16864000	5673400	16636000	8095800	7924000	11670000	6739300	11411000	8039300	9176200	5489700	16607000	11975000	10098000	9110100
Q283N4	2-oxo-4-hydroxy-4-carboxy-5-ureidoimidazoline decarboxylase	Urad	9	6912000	4576400	7153500	5252800	11980000	13162000	14796000	11598000	16487000	21140000	18834000	17296000	7949300	12961000	13429000	13007000
P26150	3 beta-hydroxysteroid dehydrogenase/Delta 5-->4-isomerase type 3;3-beta-hydroxy-Delta(5)-steroid dehydrogenase;Steroid Delta-isomerase;3 beta-hydroxysteroid dehydrogenase/Delta 5-->4-isomerase type 6;3-beta-hydroxy-Delta(5)-steroid dehydrogenase;Steroid Delta-isomerase	Hsd3b3;Hsd3b6	9	5240600	26413000	4675700	21405000	5203600	5950000	6867400	4613300	7421600	8222200	5225500	6146500	28391000	7924400	6200900	5371900
Q9EQI8	39S ribosomal protein L46, mitochondrial	Mrpl46	9	7400700	4602000	6277500	4212300	6729900	7741800	6020600	6427200	5147400	6540600	6753300	6518200	4424800	6576900	7386700	7428800
Q6ZWZ6	40S ribosomal protein S12	Rps12	9	103100000	77726000	119930000	86067000	108060000	121550000	116100000	115300000	134740000	126690000	133740000	138860000	78257000	103030000	102020000	134020000
P14131	40S ribosomal protein S16	Rps16	9	145190000	113600000	136730000	103130000	151430000	105140000	130690000	160580000	154300000	148920000	152860000	172190000	127500000	99064000	108390000	143750000
P62082	40S ribosomal protein S7	Rps7	9	129720000	98629000	135520000	91135000	146000000	108900000	145530000	143640000	115730000	150830000	123420000	133110000	108100000	112720000	96614000	114280000
I7HLV2	60S ribosomal protein L10;60S ribosomal protein L10-like	Rpl10;Rpl10l	9	29559000	43181000	24678000	40223000	28595000	26181000	29057000	32525000	33544000	26843000	26366000	29573000	45895000	20308000	19558000	19970000
Q9CZM2	60S ribosomal protein L15	Rpl15	9	50225000	48808000	36675000	50143000	42816000	29749000	44511000	49841000	61074000	37574000	54389000	60949000	53971000	32923000	37085000	35434000
P51410	60S ribosomal protein L9	Rpl9	9	62313000	49471000	49709000	51599000	53989000	55412000	63946000	57323000	51742000	57679000	54595000	52548000	58532000	43782000	52612000	46848000
D3YYE1	Acidic leucine-rich nuclear phosphoprotein 32 family member A	Anp32a	9	35471000	29996000	44531000	29730000	38141000	42262000	44310000	36601000	44288000	51364000	39934000	44472000	34960000	50091000	42551000	44608000
P68134	Actin, alpha skeletal muscle	Acta1	9	655250000	728500000	678970000	544900000	770400000	1074500000	788370000	820620000	2051900000	858690000	799540000	807480000	764980000	707070000	1045500000	849420000
Q91Z25	Actin-related protein 2/3 complex subunit 1B	Arpc1b	9	12920000	14773000	15684000	15275000	14285000	17801000	17349000	12580000	22492000	23265000	16408000	19103000	16461000	17380000	17079000	19118000
P31786	Acyl-CoA-binding protein	Dbi	9	2389400000	1073400000	2515300000	1232500000	2292700000	1815200000	1357100000	2310600000	1557800000	2011900000	2034000000	2221400000	1200800000	1681300000	1947000000	2205000000
O55137	Acyl-coenzyme A thioesterase 1	Acot1	9	5604700	23092000	6501600	22288000	1332100	5312100	3445900	1235700	706360	1158400	3714400	887920	19500000	7272600	4084900	3370300
P97823	Acyl-protein thioesterase 1	Lypla1	9	75088000	67399000	115410000	69773000	89306000	55176000	64217000	74067000	64261000	61918000	86621000	64719000	62030000	67162000	59340000	52074000
J3QN31	Adenylosuccinate synthetase isozyme 1	Adssl1	9	7429300	5553900	7545100	5966700	13881000	7896600	6417000	9024400	9252100	8788200	7259500	6677900	5110000	9999900	6666600	7345200
Q99K28	ADP-ribosylation factor GTPase-activating protein 2	Arfgap2	9	7411600	8203000	8606500	8373500	7474700	8585900	9926300	6728000	9757600	9550500	8832400	9178200	7949500	7114600	7245500	6491600
Q9DB05	Alpha-soluble NSF attachment protein	Napa	9	5808500	5406700	6431600	6453500	6501800	8746700	6467900	4646000	7051600	6305600	6299100	6990100	6183700	3768400	8472100	5500700
P07356	Annexin A2;Annexin	Anxa2	9	16276000	10124000	15472000	8148900	11213000	9874700	11199000	12346000	14025000	14457000	10902000	11413000	6246900	12717000	9652800	10720000
O35639	Annexin A3;Annexin	Anxa3	9	7820100	4812100	9925700	4577700	10758000	7447600	6907800	7388600	7308500	10256000	6621800	9021700	5131200	8539200	5965800	6847800
Q6PA06	Atlastin-2	Atl2	9	591740	11331000	235020	10356000	157966	1295600	1600300	1002100	2162100	736340	701160	894440	11101000	1885200	2296900	631470
Q925I1	ATPase family AAA domain-containing protein 3	Atad3	9	103804	15323000	67047.2	12258000	157966	274470	373220	147941	468260	174620	143516	57214	12261000	76320	89358	152277
Q8R5C5	Beta-centractin	Actr1b	9	14569000	11594000	18248000	13382000	18464000	13788000	19249000	15012000	14493000	15930000	18352000	14523000	13465000	17887000	15785000	14669000
P21550	Beta-enolase;Enolase	Eno3	9	77700	52994	56834	235301	106230	125371	124630	147941	44054000	89879	143516	134110	49542	73311	113190	152277
D3YYT0	Cadherin-2	Cdh2	9	12409000	11749000	15664000	12230000	11557000	14285000	16693000	10509000	15262000	14728000	13703000	15301000	11859000	14229000	12547000	12314000
Q9DAW9	Calponin-3	Cnn3	9	6615900	7100900	5258800	7274500	5303600	8177800	5350400	3695200	6965600	7322900	6126100	6467400	7165200	6846000	6394400	6579300
P13634	Carbonic anhydrase 1	Ca1	9	38127000	15238000	32496000	14470000	40701000	57948000	26317000	32246000	36076000	27368000	22238000	25707000	19461000	27486000	19551000	23671000
Q8VCU1	Carboxylesterase 3B	Ces3b	9	152360000	109080000	193670000	111730000	343990000	199930000	446800000	346140000	413570000	400220000	293880000	401480000	209180000	378310000	281370000	248310000
O08738	Caspase-6;Caspase-6 subunit p18;Caspase-6 subunit p11	Casp6	9	18008000	9208200	16012000	11908000	25354000	15806000	13940000	16980000	13752000	19118000	19519000	16794000	9925600	16117000	15746000	17826000
Q9WUU7	Cathepsin Z	Ctsz	9	28692000	17206000	23296000	20374000	29593000	28216000	22914000	32282000	41417000	39216000	39208000	50214000	12544000	27568000	19713000	31676000
Q6IRU5-2	Clathrin light chain B	Cltb	9	28590000	15744000	22751000	16415000	25855000	32552000	22289000	33143000	28551000	25634000	28374000	30538000	13071000	19394000	17960000	30830000
Q04447	Creatine kinase B-type	Ckb	9	22388000	12354000	28514000	11151000	25454000	24841000	22547000	30185000	22615000	31668000	25723000	25659000	9848300	22990000	16914000	17280000
Q9D1P4	Cysteine and histidine-rich domain-containing protein 1	Chordc1	9	4474600	4099700	4118800	4754600	3874000	4716000	4544400	4594500	5158400	3699900	5321500	4512500	3900900	4049100	4441800	4643900
Q9CQB4	Cytochrome b-c1 complex subunit 7	Uqcrb	9	220180000	114150000	165370000	118970000	192170000	219020000	158100000	209630000	158700000	146770000	166770000	184880000	104290000	172360000	215220000	225310000
Q9CPQ1	Cytochrome c oxidase subunit 6C	Cox6c	9	66486000	51103000	41989000	41858000	29595000	58400000	44725000	53666000	34872000	19008000	38312000	33298000	39938000	32192000	73675000	93095000
Q9DBW0	Cytochrome P450 4V2	Cyp4v2	9	103804	17999000	67047.2	11673000	201780	295810	1626400	147941	1637300	202050	143516	134110	11900000	606900	670380	597830
P97821	Dipeptidyl peptidase 1;Dipeptidyl peptidase 1 exclusion domain chain;Dipeptidyl peptidase 1 heavy chain;Dipeptidyl peptidase 1 light chain	Ctsc	9	31516000	18525000	28276000	20254000	32787000	32943000	28311000	39585000	35034000	42009000	31683000	42131000	13700000	30001000	26519000	23251000
Q3TCR7	Dynamin-2	Dnm2	9	103804	4170000	67047.2	3840900	157966	125371	124630	147941	1473300	116128	143516	134110	6480700	135792	113190	152277
P57759	Endoplasmic reticulum resident protein 29	Erp29	9	33981000	20662000	32404000	22412000	43973000	28566000	39115000	35419000	30997000	40750000	28445000	37703000	22637000	39120000	29540000	30941000
Q3TLP5	Enoyl-CoA hydratase domain-containing protein 2, mitochondrial	Echdc2	9	85472000	69165000	112880000	66847000	116940000	100390000	110410000	88511000	108940000	116750000	109600000	112420000	72455000	126350000	97898000	110360000
Q9D7J9	Enoyl-CoA hydratase domain-containing protein 3, mitochondrial	Echdc3	9	95173000	63510000	109230000	63400000	87275000	92584000	86435000	68797000	79113000	103750000	95417000	86169000	54523000	99287000	80958000	85153000
Q99K30	Epidermal growth factor receptor kinase substrate 8-like protein 2	Eps8l2	9	1175400	8172100	4089200	6029800	157966	3203200	3907600	2818800	5115800	5525700	3421700	4355500	7950500	3517700	4276700	2075700
Q80VP1	Epsin-1	Epn1	9	6333300	5610000	7787400	6038300	6240200	6586200	6869800	6263800	6550200	6398100	5620800	5575100	6653700	6571700	6471400	5927100
P48024	Eukaryotic translation initiation factor 1	Eif1	9	33688000	21157000	29906000	21354000	38378000	30500000	36369000	33241000	36090000	32450000	31296000	35239000	23163000	30316000	36166000	32597000
Q05D44	Eukaryotic translation initiation factor 5B	Eif5b	9	8343100	7488200	8545600	8117400	9549900	6945800	9301300	8701200	10715000	8109100	10657000	9791800	8196400	8504100	10123000	9668400
P47754	F-actin-capping protein subunit alpha-2	Capza2	9	17177000	29345000	22123000	26281000	22940000	27776000	24210000	17767000	23732000	26889000	21912000	23215000	30127000	25081000	26057000	25112000
Q920E5	Farnesyl pyrophosphate synthase	Fdps	9	9042700	24896000	8167000	19871000	9982400	10210000	15325000	10756000	14108000	13852000	13108000	11409000	43313000	9577000	21645000	13982000
Q07797	Galectin-3-binding protein	Lgals3bp	9	13805000	8449700	12109000	8230400	13373000	10556000	9942100	12069000	12756000	16982000	12342000	15444000	7925900	10072000	10683000	9327800
O88958	Glucosamine-6-phosphate isomerase 1	Gnpda1	9	12734000	6975400	14742000	5580000	11419000	12013000	8508400	11970000	6478600	13624000	10872000	9746400	7109200	9212700	11158000	9445500
A0A1B0GS58	Glutaredoxin-3	Glrx3	9	19662000	16837000	24148000	17301000	13767000	15571000	17397000	20083000	17698000	15062000	16876000	15422000	15396000	16647000	20140000	18667000
Q61586	Glycerol-3-phosphate acyltransferase 1, mitochondrial	Gpam	9	103804	18177000	67047.2	12550000	157966	540590	680250	147941	159978	116128	143516	134110	3927700	135792	645700	152277
Q3THK7	GMP synthase [glutamine-hydrolyzing]	Gmps	9	6917300	17520000	9882700	15235000	7613400	11111000	14777000	9581400	17336000	12330000	13940000	10832000	15925000	11476000	11239000	4666700
Q3UGR5	Haloacid dehalogenase-like hydrolase domain-containing protein 2	Hdhd2	9	27689000	14120000	32687000	14173000	39240000	25456000	28266000	29827000	24917000	29872000	27299000	31108000	16079000	31166000	27195000	26582000
P48722-2	Heat shock 70 kDa protein 4L	Hspa4l	9	7380400	4464000	9293200	4846400	10529000	8630200	8421500	9788600	6597100	8708400	8154100	9666800	5315900	10093000	8414500	8313700
Q8VDM6	Heterogeneous nuclear ribonucleoprotein U-like protein 1	Hnrnpul1	9	43003000	40824000	27468000	42098000	43153000	53994000	27163000	49961000	41094000	36102000	38970000	42132000	23512000	24600000	30894000	15408000
Q9ESB3	Histidine-rich glycoprotein	Hrg	9	21385000	10008000	16763000	10495000	23381000	20187000	19300000	19340000	22366000	21665000	17448000	21218000	11021000	17655000	13868000	14210000
A0A075B5P5	Immunoglobulin gamma-3 chain C region	Ighg3	9	15138000	2929200	7337400	12203000	4373500	2814600	4787900	2545100	7357300	85590000	11690000	18127000	2100400	5212100	6455100	152277
P24547	Inosine-5-monophosphate dehydrogenase 2	Impdh2	9	7851300	6165600	9458800	6344800	10294000	9423300	7803600	10545000	7422400	8580700	9587200	7706100	7210400	8751400	9811400	8149100
Q61702	Inter-alpha-trypsin inhibitor heavy chain H1	Itih1	9	5227600	6289100	6229200	4569700	1640000	7588400	6876900	4299900	12948000	8944100	9746300	10476000	5107200	7456800	4814400	6145800
Q91VA7	Isocitrate dehydrogenase [NAD] subunit, mitochondrial	Idh3b	9	10421000	13351000	11259000	12662000	13995000	12658000	11325000	14307000	10228000	9904500	13208000	11904000	12465000	9148800	11118000	9929900
P58044	Isopentenyl-diphosphate Delta-isomerase 1	Idi1	9	11634000	5569700	11357000	5012800	18501000	12781000	17387000	22418000	19763000	19513000	24873000	26361000	10134000	11836000	23860000	21923000
Q8BMJ2	Leucine--tRNA ligase, cytoplasmic	Lars	9	103804	8579000	111860	5616700	157966	125371	278210	104960	250110	116128	143516	134110	8219700	87069	157400	152277
Q8BP40	Lysophosphatidic acid phosphatase type 6	Acp6	9	9648700	7580600	7855900	7589900	10734000	9925900	8627100	8089900	8362200	8083900	9419400	9561100	8456500	9737200	9705700	8616100
Q61830	Macrophage mannose receptor 1	Mrc1	9	103804	18084000	67047.2	10719000	157966	125371	4093200	2221000	6395800	116128	3134800	134110	14634000	5537600	17671000	152277
Q3KQQ2	Major urinary protein 3	Mup3	9	237800000	111690000	180200000	100750000	400930000	220260000	257830000	367890000	258220000	185700000	264500000	351840000	142270000	305200000	197440000	243920000
O35857	Mitochondrial import inner membrane translocase subunit TIM44	Timm44	9	5555400	13713000	7642900	11451000	4208600	7589800	7997900	5961000	9327300	5986800	7446100	8258700	11580000	8220600	8786500	6705200
A0A140LHA2	Mitotic checkpoint protein BUB3	Bub3	9	6142500	3683700	8220600	3622500	7128500	6397600	6189300	5825400	6309600	7105100	6545300	7572300	5081300	7379500	6349300	6186000
P04247	Myoglobin	Mb	9	180040	211200	67047.2	235301	157966	125371	124630	147941	167280000	167350	126260	134110	182460	135792	113190	152277
Q9CR16	Peptidyl-prolyl cis-trans isomerase D	Ppid	9	25391000	19177000	25743000	20202000	18024000	28470000	26575000	24474000	26412000	26743000	24493000	23969000	18166000	30928000	25072000	26432000
P45878	Peptidyl-prolyl cis-trans isomerase FKBP2	Fkbp2	9	139350000	70967000	122060000	78938000	150430000	125640000	97380000	152310000	121050000	133510000	131200000	152260000	69982000	119770000	100680000	116610000
Q9D7I5	Phospholysine phosphohistidine inorganic pyrophosphate phosphatase	Lhpp	9	38120000	17451000	37136000	21206000	40952000	33424000	24570000	34500000	23714000	42835000	51447000	40729000	25308000	33931000	38170000	28608000
Q9DB26	Phytanoyl-CoA dioxygenase domain-containing protein 1	Phyhd1	9	15043000	6984400	12218000	7560200	18109000	9904800	10983000	17882000	12260000	10391000	15645000	13887000	8381800	11254000	12657000	12044000
Q9D711	Pirin	Pir	9	19532000	9088900	17329000	9869200	19741000	17204000	12655000	18700000	12828000	23578000	16418000	17015000	10278000	15165000	17060000	17358000
B7ZMP1	Probable Xaa-Pro aminopeptidase 3	Xpnpep3	9	15021000	7455600	14290000	8293400	21303000	14552000	13738000	15421000	12451000	16955000	15359000	17189000	9326800	14036000	14080000	15622000
Q8VDQ1	Prostaglandin reductase 2	Ptgr2	9	10794000	12842000	13317000	11812000	12049000	11526000	14091000	10282000	12420000	12820000	14177000	10303000	13681000	15628000	15304000	12123000
O70435	Proteasome subunit alpha type-3	Psma3	9	101250000	49605000	83995000	54786000	82101000	97119000	72592000	107010000	75226000	83946000	95564000	96204000	60577000	76941000	96839000	102100000
P28063	Proteasome subunit beta type-8;Proteasome subunit beta type	Psmb8	9	25822000	16563000	28540000	13887000	21614000	32422000	27305000	37072000	32381000	27082000	29897000	38081000	17491000	20631000	25249000	24564000
Q91V41	Ras-related protein Rab-14	Rab14	9	43514000	24765000	37699000	28096000	39705000	38642000	36466000	49201000	37398000	36934000	34506000	41224000	30285000	41969000	41802000	40203000
Q9D1G1	Ras-related protein Rab-1B	Rab1b	9	201730000	106870000	187860000	119950000	216090000	187720000	162320000	196070000	148780000	155330000	177100000	184880000	101640000	160860000	158550000	172950000
Q8BSE0	Regulator of microtubule dynamics protein 2	Rmdn2	9	6477700	27277000	6591800	23959000	4652000	7072100	7402100	3318000	7427900	2556400	4488500	4085200	20010000	6946100	5355800	3971000
Q920A5	Retinoid-inducible serine carboxypeptidase	Scpep1	9	21575000	20129000	15922000	18846000	28846000	30345000	25856000	20606000	33711000	23554000	27962000	28099000	20087000	32447000	26661000	28986000
Q61009	Scavenger receptor class B member 1	Scarb1	9	22615000	14602000	17422000	12999000	22726000	21654000	22615000	21771000	27204000	23281000	23344000	29303000	15636000	20780000	20453000	20693000
Q8BH69	Selenide, water dikinase 1	Sephs1	9	8850400	6911500	8491600	6459100	10314000	9611300	11887000	9009700	10986000	11942000	8972900	10215000	8388500	12764000	9557000	8035500
A0A0R4J233	Septin-10	Septin 10	9	19339000	14554000	21598000	14087000	20257000	22173000	18777000	20254000	17980000	21180000	18055000	21332000	15122000	19793000	20079000	20588000
H7BX95	Serine/arginine-rich splicing factor 1	Srsf1	9	27375000	15222000	23758000	14960000	39318000	30493000	23705000	29844000	25225000	32294000	24882000	32945000	15125000	24152000	26306000	29219000
Q99JR1	Sideroflexin-1	Sfxn1	9	224570	23438000	827800	13291000	407900	1433700	2600400	568140	1406000	931110	675290	677360	9526500	2174300	2093700	515550
F8VQC1	Signal recognition particle subunit SRP72	Srp72	9	2537700	6585500	3564000	6820100	970870	3004400	5283800	2257400	4647200	3617400	3766300	2791500	8399400	3724700	2802500	3657900
Q9WUM5	Succinyl-CoA ligase [ADP/GDP-forming] subunit alpha, mitochondrial	Suclg1	9	36320000	111320000	45692000	95629000	45163000	46273000	51869000	36515000	67017000	57504000	48944000	52840000	89016000	64186000	42831000	51450000
Q8VBW8	Tetratricopeptide repeat protein 36	Ttc36	9	114600000	61444000	96124000	70131000	104650000	113920000	94954000	119570000	85890000	121020000	91126000	82993000	76770000	97438000	117580000	107180000
Q921T2-3	Torsin-1A-interacting protein 1	Tor1aip1	9	2326100	5093800	3108300	6262100	2938700	2187800	3821500	1684400	4084100	4536300	2850300	3195000	5111400	3390800	2569700	1763200
P62869	Transcription elongation factor B polypeptide 2	Tceb2	9	27041000	19518000	24091000	21381000	22080000	29447000	22083000	26877000	25037000	27199000	24960000	26565000	18591000	22801000	28306000	30279000
Q9QUI0	Transforming protein RhoA	Rhoa	9	59834000	32976000	60260000	39262000	65457000	50315000	46937000	61589000	55821000	70618000	62333000	70822000	37634000	55733000	50856000	65751000
F8WID5	Tropomyosin alpha-1 chain	Tpm1	9	8168800	6195400	7727700	3078400	6051900	7436200	5801500	9186200	30235000	9454200	6992900	7427000	4086900	6123600	5798300	7474100
Q8QZR1	Tyrosine aminotransferase	Tat	9	547420	2730900	67047.2	2633000	4097700	1549700	3790200	2660300	4107100	11633000	3252800	2942600	2602000	5183100	6074500	3424900
Q62376	U1 small nuclear ribonucleoprotein 70 kDa	Snrnp70	9	11896000	5970200	7438500	7829400	11221000	11732000	8394900	11821000	10560000	10494000	11206000	12496000	6689300	8864300	8769800	10189000
Q8R317	Ubiquilin-1	Ubqln1	9	18208000	12949000	17996000	13614000	20060000	17258000	18538000	17954000	19663000	17150000	16092000	17859000	13999000	19105000	16979000	16947000
A0A0H2UH17	Ubiquitin-associated protein 2-like	Ubap2l	9	5811100	4797300	6269200	4897000	5357900	6458400	5601600	5736200	6032000	6082400	6233800	6448600	4551300	4648800	4872900	6661800
D3Z645	Vacuolar protein sorting-associated protein 29	Vps29	9	18752000	10439000	18427000	12756000	28448000	19678000	16346000	27409000	21806000	24276000	24585000	27719000	11504000	17773000	16951000	21203000
O70503	Very-long-chain 3-oxoacyl-CoA reductase	Hsd17b12	9	661830	45751000	668550	32366000	151570	1024300	1594800	135530	1845600	837680	200640	128400	32306000	1577300	2127800	152277
Q8C6B0	Methyltransferase like 7A1	Mettl7a1;mCG_20149	9	10187000	44589000	12941000	37239000	13619000	11074000	16456000	12123000	14604000	13968000	8289700	9794300	37782000	21247000	13088000	9699600
D3Z158	glutamine--tRNA ligase	Qars	9	103804	12104000	52012	10052000	157966	77616	53779	147941	76493	116128	207750	67544	4296500	199520	48903	62814
B2RT14	UDP glucuronosyltransferase 1 family, polypeptide A5	Ugt1a5	9	9681700	21346000	20784000	22181000	4186700	9619900	10582000	5368600	5448800	2066300	8090000	4431600	19661000	15000000	15952000	15358000
Q9CQV8	14-3-3 protein beta/alpha;14-3-3 protein beta/alpha, N-terminally processed	Ywhab	8	22913000	21755000	23468000	23389000	16884000	24799000	24580000	19105000	28380000	26472000	28771000	24033000	18783000	23508000	23329000	26467000
Q9R092	17-beta-hydroxysteroid dehydrogenase type 6	Hsd17b6	8	10873000	18506000	12361000	10141000	6954200	10722000	6861200	6745600	6745800	20274000	5624200	4103800	5301400	32056000	10714000	12406000
P62334	26S protease regulatory subunit 10B	Psmc6	8	5046600	18702000	5820100	15668000	5568100	6533200	8597600	3302300	7638400	7266200	5565500	5825500	16684000	7950000	7249900	4880600
Q9D8W5	26S proteasome non-ATPase regulatory subunit 12	Psmd12	8	1065200	22926000	1876300	10900000	157966	2556800	2745500	767660	3336500	3356600	2542500	1882500	18706000	4035300	2147700	1809800
O35593	26S proteasome non-ATPase regulatory subunit 14	Psmd14	8	6310300	14297000	6824800	13343000	4721800	7027800	6842300	4907400	8023000	6748300	7363200	4812800	15472000	7384400	7446000	5148300
Q9DB15	39S ribosomal protein L12, mitochondrial	Mrpl12	8	36223000	23133000	31043000	24092000	30500000	36330000	31310000	33827000	36794000	34928000	35827000	37375000	22266000	28670000	41243000	42983000
Q921H8	3-ketoacyl-CoA thiolase A, peroxisomal	Acaa1a	8	138270000	112270000	169670000	125020000	109190000	120300000	78393000	116960000	80373000	94915000	122290000	104190000	116560000	114740000	128590000	141740000
P62264	40S ribosomal protein S14	Rps14	8	37303000	31734000	29913000	29175000	43964000	42709000	34956000	39682000	42325000	39198000	35109000	40813000	31620000	23066000	31468000	36458000
D3YUT3	40S ribosomal protein S19	Rps19	8	137710000	78055000	106490000	81299000	138470000	129950000	112390000	142320000	130110000	124160000	112620000	143620000	94968000	91657000	141560000	140590000
D3YYM6	40S ribosomal protein S5;40S ribosomal protein S5, N-terminally processed	Rps5	8	151640000	86247000	137500000	92491000	180440000	147200000	158850000	174120000	147750000	151620000	158890000	181540000	102150000	132200000	125140000	163530000
A0JNU3	60 kDa lysophospholipase;L-asparaginase;Platelet-activating factor acetylhydrolase	Aspg	8	3606200	8244700	5561000	9626300	1207400	5009000	6597300	2235900	3577500	3810900	3420200	2832800	8527000	7598900	4915900	3716500
P99027	60S acidic ribosomal protein P2	Rplp2	8	404350000	225490000	352610000	252110000	418240000	389230000	357800000	427970000	468290000	375590000	416680000	503030000	271220000	309570000	392210000	414950000
A0A1D5RM85	60S ribosomal protein L18a	Rpl18a	8	21669000	34517000	16236000	30674000	15765000	12641000	20814000	21977000	28545000	17189000	19507000	24920000	33124000	14985000	12842000	16782000
P62751	60S ribosomal protein L23a	Rpl23a	8	47791000	80584000	32067000	67032000	43742000	42964000	37332000	51906000	52443000	42009000	32479000	50368000	78309000	30467000	33606000	36763000
P62918	60S ribosomal protein L8	Rpl8	8	33724000	45543000	23401000	46573000	27645000	23262000	29316000	40489000	40873000	27232000	32726000	37220000	46158000	18859000	23010000	23472000
P61161	Actin-related protein 2	Actr2	8	37546000	29726000	38796000	31419000	34734000	45235000	41678000	35584000	43457000	47406000	42113000	45283000	37482000	40465000	48215000	44513000
P59999	Actin-related protein 2/3 complex subunit 4	Arpc4	8	34655000	31353000	42838000	32004000	46267000	39073000	36842000	34658000	39839000	47702000	37046000	41550000	40982000	47958000	35798000	38475000
P58137	Acyl-coenzyme A thioesterase 8	Acot8	8	15754000	8073000	16259000	9169700	13241000	11908000	10332000	15321000	9197700	9165600	11588000	11360000	6723400	9642800	12561000	12823000
Q9WUR9	Adenylate kinase 4, mitochondrial	Ak4	8	7613600	13435000	5962800	11936000	7376800	7767400	7403000	5347900	7950900	7283800	6496500	6175700	11564000	10166000	8268700	8145700
P45376	Aldose reductase	Akr1b1;Akr1b3	8	12972000	9858600	8314500	8362300	17752000	10944000	12143000	19770000	17195000	13981000	10380000	14693000	9128000	12343000	9968900	12185000
Q60590	Alpha-1-acid glycoprotein 1	Orm1	8	20469000	9294300	26199000	19106000	26878000	18324000	31193000	35579000	58370000	30062000	22114000	45951000	12053000	18476000	16118000	15153000
P55302	Alpha-2-macroglobulin receptor-associated protein	Lrpap1	8	23219000	11305000	19809000	13008000	19444000	24930000	20228000	24439000	23039000	20326000	18333000	22641000	13065000	17740000	19331000	23138000
A0A494BBD8	Annexin A1	Anxa1	8	4916600	3655500	4682700	2600100	6570000	4867800	5094200	3964000	6092000	8022600	5693500	5689500	2935900	5492400	5159100	4732100
Q3TWV4	AP-2 complex subunit mu	Ap2m1	8	103804	16460000	67047.2	14243000	157966	1732800	1640300	147941	612470	116128	143516	134110	26841000	1002000	1241200	152277
O88533	Aromatic-L-amino-acid decarboxylase	Ddc	8	1536600	10679000	1799500	8893800	157966	3311300	6415500	147941	3214400	5250300	3448500	1308100	14720000	6707700	3734400	4422300
A0A0R4J138	Arylsulfatase B	Arsb	8	30580000	15472000	21534000	17545000	36300000	31112000	25558000	34979000	31257000	23039000	32020000	35878000	13946000	27342000	27984000	33549000
P34927	Asialoglycoprotein receptor 1	Asgr1	8	119390000	64145000	80677000	72726000	106990000	109720000	101350000	102770000	100880000	90448000	103130000	104400000	70723000	97267000	101520000	105780000
Q61102	ATP-binding cassette sub-family B member 7, mitochondrial	Abcb7	8	103804	7721100	412930	6104800	157966	635880	739800	147941	744940	781990	523550	416300	5413700	657980	723030	152277
P29416	Beta-hexosaminidase subunit alpha	Hexa	8	8795300	5095700	6551400	4330200	6906100	6860600	7191600	8232200	8595800	8991300	10018000	7533700	4398200	7412600	7051800	6191000
G3X8T3	Carboxypeptidase;Lysosomal protective protein;Lysosomal protective protein 32 kDa chain;Lysosomal protective protein 20 kDa chain	Ctsa	8	3525500	9899900	3032800	7925300	3992800	5676800	5508900	3826900	7642400	5904800	5194900	5722700	8698800	6941400	4489600	5175100
P70677	Caspase-3;Caspase-3 subunit p17;Caspase-3 subunit p12	Casp3	8	9100100	5810800	9106000	5162800	14003000	9120200	9103500	12005000	9570500	13665000	11100000	10691000	5803200	10024000	9754900	12331000
A0A3B2W812	CD2-associated protein	Cd2ap	8	3220500	2292700	3122300	2341500	1361700	3924200	2706000	2433500	3802500	3429400	2311800	4597400	2619400	4426900	2402200	3232000
Q9D273	Cob(I)yrinic acid a,c-diamide adenosyltransferase, mitochondrial	Mmab	8	19560000	10933000	19869000	10953000	25747000	20084000	15811000	25981000	21430000	18763000	23052000	26878000	12006000	16801000	20195000	22051000
Q8R3Q6	Coiled-coil domain-containing protein 58	Ccdc58	8	51397000	24336000	43353000	27349000	57504000	53084000	39363000	54083000	41662000	52684000	50069000	51516000	28394000	46013000	47018000	46005000
Q8JZN2	Cold shock domain-containing protein E1	Csde1	8	3635800	4620300	4151000	5067300	3805600	5120500	4089800	4135400	5282700	4890200	5511000	5425100	4247000	3809500	4909900	5176200
O35864	COP9 signalosome complex subunit 5	Cops5	8	8143400	5897500	10239000	5807400	8897300	7855000	8836900	6559200	8153900	9364000	7955300	7760700	7487300	10484000	8359800	8293600
Q9WUM3	Coronin-1B	Coro1b	8	9128800	8703000	7689700	7720300	9482900	6735600	6161400	7066000	7063100	9898400	8225500	8145200	11066000	6381000	7015800	8082000
Q9Z1J3	Cysteine desulfurase, mitochondrial	Nfs1	8	3517600	5945400	3547900	5380000	4021700	3567100	4520500	3092100	3867500	3820200	4462300	3654500	5093700	5144900	4128000	4172700
Q3U0B3	Dehydrogenase/reductase SDR family member 11	Dhrs11	8	14526000	8349900	13525000	9327900	15351000	15521000	10150000	15993000	12144000	12781000	13540000	14558000	8850400	13268000	13237000	13587000
A2AN08-3	E3 ubiquitin-protein ligase UBR4	Ubr4	8	103804	2170100	67047.2	2008000	157966	125371	124630	147941	159978	116128	143516	134110	2009800	135792	113190	152277
Q6DYE8	Ectonucleotide pyrophosphatase/phosphodiesterase family member 3;Alkaline phosphodiesterase I;Nucleotide pyrophosphatase	Enpp3	8	8702700	4019100	7221900	5216800	8809100	6822600	9160200	7501600	8826200	9801800	5986100	8360700	4957800	6285400	5919000	6569800
Q8C845	EF-hand domain-containing protein D2	Efhd2	8	12814000	7815500	12451000	7706800	13548000	11093000	11992000	15092000	14911000	15455000	14446000	13121000	9822000	12663000	10490000	12091000
Q9EQ06	Estradiol 17-beta-dehydrogenase 11	Hsd17b11	8	15799000	22901000	21548000	21985000	16646000	13775000	16355000	17918000	10385000	9387200	9831800	9507100	19659000	25031000	15591000	15980000
Q8R1B4	Eukaryotic translation initiation factor 3 subunit C	Eif3c	8	5109200	12812000	5001100	13120000	1110900	3655200	4835700	2450900	7476100	4836300	3061100	6152300	14303000	4721000	5019700	1737700
P60229	Eukaryotic translation initiation factor 3 subunit E	Eif3e	8	627250	5390200	724540	7628700	344270	778970	1655900	147941	1710700	1510600	719820	722950	5815400	1415000	1224900	826580
Q91WK2	Eukaryotic translation initiation factor 3 subunit H	Eif3h	8	7733000	9034600	7030700	10399000	6674300	8606900	8925000	6806900	11077000	8364200	9373600	8683100	9330200	7727800	9178200	9683200
Q8QZY1	Eukaryotic translation initiation factor 3 subunit L	Eif3l	8	103804	10543000	67047.2	9554300	157966	125371	372730	147941	336970	116128	74830	134110	9910000	125200	112800	152277
F7CBP1	Eukaryotic translation initiation factor 4 gamma 2	Eif4g2	8	819150	3406500	699820	6972200	1607200	1546500	1379900	716180	2125000	1262300	831800	1174500	3805500	881060	1135800	152277
P59325	Eukaryotic translation initiation factor 5	Eif5	8	18437000	20300000	18180000	18878000	14928000	20201000	24100000	13143000	22879000	21014000	17987000	17866000	21598000	22723000	20017000	19566000
O55135	Eukaryotic translation initiation factor 6	Eif6	8	20580000	11246000	17795000	13053000	16554000	19052000	18436000	17906000	19788000	20447000	21037000	19891000	11984000	16702000	20529000	20322000
Q6P5F9	Exportin-1	Xpo1	8	103804	1778800	67047.2	3781400	157966	125371	192470	147941	299080	116128	143516	134110	5322900	135792	187230	152277
B1AQR8	Galectin;Galectin-9	Lgals9	8	7874200	14309000	8938800	13215000	6884300	8386200	7804400	8091200	8597800	8535000	9551600	7795200	14769000	8501800	7454000	7054500
P16045	Galectin-1	Lgals1	8	179890000	107100000	233410000	117920000	66726000	84058000	52726000	73560000	66779000	46675000	55701000	59631000	55386000	58233000	56910000	82452000
P24472	Glutathione S-transferase A4	Gsta4	8	179720000	97931000	165910000	93752000	175010000	142140000	79769000	157520000	65982000	170530000	134980000	81320000	65892000	184410000	132570000	153670000
G5E8M7	Glutathione S-transferase Mu 6	Gstm6	8	15189000	20490000	18587000	20745000	14011000	13555000	18663000	13290000	13311000	14974000	20272000	9698900	20460000	15196000	21324000	15332000
Q99LP6	GrpE protein homolog 1, mitochondrial	Grpel1	8	39918000	27570000	36834000	26987000	48416000	39103000	39914000	44256000	41415000	43773000	41785000	42706000	28507000	37102000	37050000	42964000
G3UZP7	H-2 class I histocompatibility antigen, D-B alpha chain;H-2 class I histocompatibility antigen, L-D alpha chain	H2-D1;H2-L	8	14103000	13097000	18398000	11198000	10104000	22419000	16015000	15879000	16873000	15508000	18985000	17973000	11841000	10535000	13192000	13621000
Q8R081	Heterogeneous nuclear ribonucleoprotein L	Hnrnpl	8	11984000	19988000	16031000	20766000	14175000	14934000	22585000	12257000	25300000	22092000	23344000	22001000	21916000	24098000	14978000	20790000
P70349	Histidine triad nucleotide-binding protein 1	Hint1	8	233250000	136520000	242570000	140130000	303550000	228660000	192150000	266090000	217200000	290580000	242900000	307470000	155960000	247460000	237240000	272150000
P62806	Histone H4	Hist1h4a	8	129770000	283610000	143780000	194180000	136020000	146920000	88244000	103350000	157580000	133040000	111310000	177670000	590900000	137650000	113750000	277270000
Q60972	Histone-binding protein RBBP4	Rbbp4	8	24407000	11819000	22465000	12956000	29787000	21880000	19051000	27628000	22104000	26412000	22920000	26439000	13379000	22210000	21492000	25105000
Q2TPA8	Hydroxysteroid dehydrogenase-like protein 2	Hsdl2	8	4143700	18001000	2675400	17180000	847510	4237400	4456700	2909200	4585200	2743700	3714200	3748900	14217000	4156400	4083600	3020900
Q8K4H1-2	Kynurenine formamidase	Afmid	8	103804	7404300	1404000	6772100	157966	125371	2456100	408840	1421100	116128	143516	134110	9556000	1148300	1521000	152277
Q9D967	Magnesium-dependent phosphatase 1	Mdp1	8	14187000	8023600	12638000	7487700	16336000	12658000	11398000	14831000	10764000	11594000	12821000	12663000	7344800	12213000	12977000	12684000
Q6ZQI3	Malectin	Mlec	8	15090000	12093000	16340000	12698000	11019000	11921000	15074000	13754000	11401000	8679600	11067000	11707000	9296600	10298000	11726000	11685000
P45700	Mannosyl-oligosaccharide 1,2-alpha-mannosidase IA	Man1a1	8	6171200	4884100	5623100	4549100	6962900	4644900	7445900	5585400	4921400	7407400	4702600	5496500	4202400	5278000	6696800	5154200
Q78IK4	MICOS complex subunit Mic27	Apool	8	1039300	17549000	1599300	17037000	625010	1988300	1689000	942920	1258700	1201900	1050500	134110	14312000	1614100	2812400	1466200
Q791V5	Mitochondrial carrier homolog 2	Mtch2	8	5526400	19678000	3641300	18865000	2223900	3884400	3772400	4094200	2074000	2401900	3393200	2152200	18119000	2413800	7081800	9574300
Q9D023	Mitochondrial pyruvate carrier 2	Mpc2	8	3133600	51910000	3026500	52392000	1463300	3329700	4945200	2939000	6786600	2955500	3992900	2429900	43261000	5877600	7245100	3082600
Q9CXT8	Mitochondrial-processing peptidase subunit beta	Pmpcb	8	8065800	8090100	7491300	9892600	9787600	7003100	10003000	6408700	9600600	9829500	8796600	7943500	11294000	9205300	9853900	7795200
P05977	Myosin light chain 1/3, skeletal muscle isoform	Myl1	8	103804	211200	278770	235301	157966	125371	124630	147941	31836000	285030	143516	134110	242490	135792	113190	152277
A0A1W2P6F6	Myosin light polypeptide 6	Myl6	8	46673000	34184000	42132000	30875000	35911000	53381000	44050000	40424000	43643000	55390000	43794000	46352000	43313000	47537000	63042000	55105000
Q9DCS9	NADH dehydrogenase [ubiquinone] 1 beta subcomplex subunit 10	Ndufb10	8	48079000	31758000	47144000	31630000	34997000	49035000	55439000	39645000	29347000	20286000	32124000	28050000	26147000	36707000	61077000	57907000
P57716	Nicastrin	Ncstn	8	6315500	3947000	4364200	2426600	10234000	6704700	7432700	7372300	6197000	7920700	6303500	7882800	3238900	5254400	5998100	5186500
P62960	Nuclease-sensitive element-binding protein 1	Ybx1	8	29537000	15406000	22702000	15364000	23832000	29031000	21962000	32290000	27485000	27102000	28143000	36483000	17567000	23274000	30202000	33540000
Q5SQB0	Nucleophosmin	Npm1	8	69260000	38695000	61507000	41381000	69669000	57465000	63357000	62643000	52082000	80321000	61231000	69980000	39813000	65138000	59348000	62940000
Q9R0A0	Peroxisomal membrane protein PEX14	Pex14	8	11640000	8105600	12158000	9142100	11598000	10917000	11763000	10622000	9538200	9377600	8930100	8296500	7805000	10293000	13010000	13353000
Q8BWW3	Phosphoacetylglucosamine mutase	Pgm3	8	5743100	6569100	6538900	5207800	4712600	3435900	5960600	6167700	5724100	10191000	5311200	9672400	6547600	6967700	2774700	4750600
Q8VDG5	Phosphopantothenate--cysteine ligase	Ppcs	8	13779000	10216000	14301000	9984400	18329000	13266000	12705000	13428000	11828000	11130000	12758000	12815000	9079000	12249000	14552000	13701000
Q08857	Platelet glycoprotein 4	Cd36	8	33453000	18118000	37886000	16674000	17694000	22874000	13616000	16965000	12836000	16408000	15317000	10154000	11305000	12471000	14687000	16782000
O70570	Polymeric immunoglobulin receptor;Secretory component	Pigr	8	11092000	13638000	13632000	11912000	11174000	15394000	13137000	10250000	17196000	10922000	14899000	14482000	9220600	12951000	10303000	13810000
Q8CHQ9	Probable N-acetyltransferase CML2	Cml2	8	1067200	60305000	2037000	49769000	661710	3187500	5434100	2058200	6785000	1219500	1418800	2743900	55369000	3047500	5133000	535540
A2BE93	Protein SET	Set	8	62079000	28810000	46770000	32481000	76992000	63140000	54426000	67817000	66129000	84283000	64159000	72862000	34113000	48675000	66606000	65408000
F7D432	Protein-L-isoaspartate O-methyltransferase;Protein-L-isoaspartate(D-aspartate) O-methyltransferase	Pcmt1	8	16539000	9462700	15133000	9695700	15603000	18672000	10832000	17619000	15433000	16353000	14583000	18288000	7760100	14868000	12085000	15692000
Q80SW1	Putative adenosylhomocysteinase 2	Ahcyl1	8	5598200	4423600	5504200	4724200	7470000	6242400	5634800	5717700	6251900	6723000	6144800	7680400	4990900	4427000	5823700	7260300
P97855	Ras GTPase-activating protein-binding protein 1	G3bp1	8	11434000	11789000	10177000	12440000	10601000	13554000	11093000	10595000	13871000	10895000	11368000	10774000	12710000	9611200	11689000	10794000
Q3TLP8	Ras-related C3 botulinum toxin substrate 1;Ras-related C3 botulinum toxin substrate 2;Ras-related C3 botulinum toxin substrate 3	Rac1;Rac2;Rac3	8	43188000	30399000	33915000	28047000	49381000	37319000	35354000	45694000	44665000	46359000	39439000	49497000	27547000	36524000	41245000	43517000
P35278	Ras-related protein Rab-5C	Rab5c	8	37998000	22400000	32706000	22197000	29450000	38630000	31530000	38257000	33379000	31014000	31977000	40034000	23382000	31790000	34698000	33984000
P62835	Ras-related protein Rap-1A	Rap1a	8	94308000	47848000	75933000	49853000	85970000	91964000	68478000	85598000	77577000	80350000	81431000	86520000	48581000	74295000	75179000	80498000
Q00915	Retinol-binding protein 1	Rbp1	8	15671000	5327600	12650000	6556900	15399000	14443000	13126000	14589000	20727000	65389000	19277000	31879000	5894600	11590000	14832000	14595000
A0A0J9YTY0	Septin-11	Septin 11	8	6943400	4609600	6390100	4444000	7680700	8501700	6374300	9077800	10932000	9381200	8958200	11538000	5264600	6101800	6719600	7380200
Q80UG5	Septin-9	Septin 9	8	3819200	8087000	5626600	6566400	5560500	5256900	4860400	4330400	6015000	5834200	4513000	4870100	7861700	4010900	5906300	4220600
Q6P1F6	Serine/threonine-protein phosphatase 2A 55 kDa regulatory subunit B alpha isoform;Serine/threonine-protein phosphatase 2A 55 kDa regulatory subunit B	Ppp2r2a	8	6013200	3724800	4937800	4272700	6095400	5020100	5213700	4589100	4540000	4299100	4235200	5818400	4633000	5096600	5167500	5608400
Q9CQR6	Serine/threonine-protein phosphatase 6 catalytic subunit;Serine/threonine-protein phosphatase 6 catalytic subunit, N-terminally processed	Ppp6c	8	5820500	3810200	4138000	3650900	10722000	5800600	4891400	7442000	5261200	6351300	6259600	7835000	4130600	4889900	5106300	6720600
A0A0N4SUN2	Solute carrier organic anion transporter family member 1B2	Slco1b2	8	10311000	51583000	8892700	50167000	11959000	13229000	18006000	10216000	17652000	9447300	12385000	10481000	49353000	17142000	11015000	11488000
Q9CWK8	Sorting nexin-2	Snx2	8	3451400	11536000	4202100	11709000	4831100	5113000	5387100	2278700	7177800	6232600	4592800	5814900	12141000	5060900	5456100	3197700
Q3UZZ6	Sulfotransferase 1 family member D1	Sult1d1	8	6501800	30133000	8012000	27197000	7116900	11401000	15062000	6673200	15297000	11038000	8657000	8121000	32858000	16422000	11807000	10294000
Q3TCU5	Tapasin	Tapbp	8	5647400	7019700	7593100	4920100	4352100	8519900	8433100	6383400	6937200	6084200	8257400	6609900	5211200	5519200	5462200	7164100
Q9R0M5	Thiamin pyrophosphokinase 1	Tpk1	8	19222000	10716000	19552000	10065000	27508000	15189000	17179000	21602000	13183000	15679000	17972000	17940000	9158500	14413000	18628000	17587000
P39447	Tight junction protein ZO-1	Tjp1	8	4614600	4282800	4826200	4186900	5490400	5735000	5019900	3956900	5466800	5544500	4400600	5393800	3374000	5007900	4533300	4420000
A0A3B2WBH9	Tight junction protein ZO-2	Tjp2	8	3793500	3068600	4919700	2917900	4591500	5056900	4154700	3946600	5173900	4192100	4009800	4898200	3614700	4111800	4199800	3768800
E9Q8N1	Titin	Ttn	8	9590400	8730300	8962700	6000000	10382000	8913300	16145000	11380000	11324000	10963000	9868500	7281400	7193600	7937900	10390000	13572000
E9PYD5	Transcription elongation factor A protein 1	Tcea1	8	13470000	7358800	9309300	8308100	13212000	14903000	11284000	13909000	13236000	13034000	13673000	14800000	8050000	11940000	10370000	14487000
Q9JHJ0	Tropomodulin-3	Tmod3	8	9976800	6682900	10093000	6341300	10280000	12028000	11977000	10074000	8892700	10271000	10212000	10293000	8906100	11215000	12261000	11603000
Q9CYZ2	Tumor protein D54	Tpd52l2	8	19922000	16327000	20369000	15648000	21327000	18657000	23947000	16652000	23081000	22974000	19215000	20041000	18283000	22585000	20260000	19883000
A0A087WRE5	U8 snoRNA-decapping enzyme	Nudt16	8	5938500	3092500	6675100	3934600	11170000	7108200	7800200	8000300	5817500	5893700	6359100	6910900	3954100	8245800	6735400	6305800
Q9JKB1	Ubiquitin carboxyl-terminal hydrolase isozyme L3;Ubiquitin carboxyl-terminal hydrolase isozyme L4	Uchl3;Uchl4	8	7115500	10534000	7291100	11008000	4452100	8390100	7291100	6119300	8184200	7146400	7220000	5847400	9779100	7376100	7935400	8249900
P61089	Ubiquitin-conjugating enzyme E2 N	Ube2n	8	22214000	30623000	22911000	27618000	23604000	28317000	26079000	22232000	28864000	26482000	25128000	24041000	28074000	25001000	24684000	26787000
A0A0R4J1F6	UDP-N-acetylhexosamine pyrophosphorylase;UDP-N-acetylgalactosamine pyrophosphorylase;UDP-N-acetylglucosamine pyrophosphorylase	Uap1	8	8612100	5849200	7240300	5640600	11815000	4846500	8002500	9633300	7796000	8797200	8332600	8321200	6526000	7766100	7112800	7151100
Q9DBP5	UMP-CMP kinase	Cmpk1	8	40376000	52838000	49263000	49182000	34884000	43419000	57174000	31945000	48761000	42281000	40096000	38393000	54576000	57610000	47175000	46103000
Q5EBG8	Uncharacterized protein C1orf50 homolog		8	17580000	9188800	13721000	9856300	18097000	15574000	14306000	18136000	13867000	14017000	14306000	10749000	9815300	13174000	14919000	14131000
Q9DCS2	UPF0585 protein C16orf13 homolog	0610011F06Rik	8	176920000	97306000	157760000	96136000	210270000	165440000	134050000	200240000	100140000	135910000	156190000	138860000	99471000	146790000	139510000	160510000
Q9WV55	Vesicle-associated membrane protein-associated protein A	Vapa	8	38511000	44829000	33153000	49176000	23233000	42890000	35557000	26988000	33745000	24915000	35383000	27346000	36669000	30622000	34891000	37036000
Q8BGC4	Zinc-binding alcohol dehydrogenase domain-containing protein 2	Zadh2	8	41165000	108940000	22199000	91497000	40081000	30294000	25927000	35231000	36633000	35861000	37297000	24398000	96221000	33480000	41885000	38163000
Q7TQE2	Zyxin	Zyx	8	2921900	2071100	3038900	2699200	4235800	4352800	3353800	4465200	3906900	4247400	3914700	4002700	2058200	3139700	3350800	4009800
A0A286YDI8	Sec24 related gene family, member C (S. cerevisiae)	Sec24c	8	578000	10679000	2067600	10047000	437050	1365500	1295600	1451400	1800100	869200	561890	677900	9327900	2185800	1357900	2891900
Q9Z1A1	TFG protein	Tfg	8	10154000	10178000	12891000	8892000	14341000	11133000	13933000	10183000	12518000	11196000	10417000	11679000	9623800	13175000	12974000	11908000
Q64433	10 kDa heat shock protein, mitochondrial	Hspe1;Cpn10-rs1	7	930340000	486840000	863620000	516420000	1390400000	1019600000	896700000	1244700000	1031400000	1179100000	990620000	1146600000	578670000	912730000	856220000	997800000
P68510	14-3-3 protein eta	Ywhah	7	4899500	7563700	6584900	7643700	4455800	6337400	6709100	4960700	8959600	8905200	7627600	5971800	6580000	6687800	7236800	6841300
P68254-2	14-3-3 protein theta	Ywhaq	7	13213000	16007000	16055000	17170000	13500000	17096000	17414000	12536000	20990000	23066000	16546000	14573000	17671000	20798000	14675000	15718000
P62301	40S ribosomal protein S13	Rps13	7	146710000	126830000	132200000	112010000	186000000	146340000	128760000	172670000	154070000	164190000	121750000	164870000	144040000	113590000	127360000	149150000
P62245	40S ribosomal protein S15a	Rps15a	7	76808000	70861000	70735000	66205000	75474000	53504000	74302000	92115000	85414000	75938000	79022000	95198000	82566000	52803000	62123000	60378000
Q9CRB3	5-hydroxyisourate hydrolase	Urah	7	28686000	97604000	50717000	89874000	33924000	40533000	61782000	37961000	61693000	56688000	44135000	38723000	107920000	63745000	44397000	40775000
P47963	60S ribosomal protein L13	Rpl13	7	72025000	127790000	51673000	108550000	73456000	62329000	53560000	77139000	79312000	65986000	51273000	76539000	127130000	42532000	54991000	49020000
P35980	60S ribosomal protein L18	Rpl18	7	75188000	93401000	50020000	95001000	45703000	39195000	64251000	65058000	89273000	45529000	64013000	73270000	92627000	43010000	37705000	52502000
A2AKK5	Acyl-coenzyme A amino acid N-acyltransferase 1	Acnat1	7	17718000	10095000	16941000	12224000	14649000	16921000	12062000	16239000	14468000	11484000	15308000	13400000	10633000	13813000	14147000	15950000
P08030	Adenine phosphoribosyltransferase	Aprt	7	6057300	4212600	6766200	4489500	15413000	7016800	8032000	12630000	12285000	16144000	11806000	12322000	6117500	9837000	7853500	8593000
Q9CQW2	ADP-ribosylation factor-like protein 8B	Arl8b	7	16000000	7736100	15264000	10048000	17511000	12410000	14141000	12755000	12864000	15677000	15946000	20940000	9466000	15588000	12834000	10476000
Q9QYY9	Alcohol dehydrogenase 4	Adh4	7	5853700	14212000	6878200	14729000	1704800	6089100	7682500	4265700	5849900	4607000	7745200	2250800	11097000	9079600	8388000	4513300
A0A1B0GSU0	Aldehyde dehydrogenase family 16 member A1	Aldh16a1	7	263160	15821000	629030	9933700	157966	291580	1052300	147941	448040	232130	143516	146740	12321000	1333500	1371100	277930
Q00897	Alpha-1-antitrypsin 1-4	Serpina1d	7	22658000	42438000	27116000	38601000	28976000	37081000	40183000	25087000	44236000	39175000	28184000	28243000	45430000	34427000	25354000	25228000
Q00898	Alpha-1-antitrypsin 1-5	Serpina1e	7	3094200	5867700	1838500	5265100	11739000	6664600	35957000	11328000	65502000	50728000	19406000	38238000	22994000	20750000	9926300	11305000
E9PZ88	Alpha-mannosidase;Alpha-mannosidase 2C1	Man2c1	7	3821000	2485100	4248200	2239000	3724100	2774400	3711100	4213700	1977500	3082800	3115300	1928800	2680400	3899700	3285400	2281900
Q07076	Annexin A7	Anxa7	7	15763000	10783000	16002000	12045000	14823000	10511000	11706000	12332000	11943000	11735000	11305000	12115000	10169000	10312000	9645500	6822300
Q8CBB7	AP-1 complex subunit gamma-1	Ap1g1	7	103804	5027200	67047.2	4133200	157966	125371	124630	147941	159978	116128	143516	134110	4120900	135792	113190	152277
F6RJ39	Apoptotic chromatin condensation inducer in the nucleus	Acin1	7	5847400	4319400	6292200	5468000	5128800	6189900	6792900	6027100	5937900	5603100	5690300	5905900	5477300	7238500	5279300	6276400
P97450	ATP synthase-coupling factor 6, mitochondrial	Atp5j	7	385770000	213010000	330900000	202150000	429790000	418820000	278320000	385410000	366160000	329030000	378240000	465580000	218590000	309580000	385150000	432870000
K3W4Q8	Basigin	Bsg	7	64157000	35080000	57033000	37243000	47892000	60556000	44417000	53547000	54993000	47468000	55237000	60684000	28908000	41886000	44633000	57302000
Q9CY64	Biliverdin reductase A	Blvra	7	103804	10682000	1296700	7644400	157966	125371	2441800	1773400	2101000	2102600	143516	134110	8418800	1817200	1727400	152277
Q8CE80	Calpastatin	Cast	7	5730700	3099100	6460000	2785400	7784700	6817100	5646000	6208000	6674600	7422500	6094800	6730300	3699800	6158100	6964800	7485300
Q60865	Caprin-1	Caprin1	7	16893000	16729000	21172000	16408000	12774000	17999000	20455000	14889000	16506000	16974000	17610000	16179000	18123000	18969000	18280000	13060000
P06797	Cathepsin L1;Cathepsin L1 heavy chain;Cathepsin L1 light chain	Ctsl	7	14675000	6565900	11859000	7668200	19077000	14496000	11688000	19042000	19601000	26842000	18579000	23536000	7958900	13619000	14585000	14154000
Q8K1J6	CCA tRNA nucleotidyltransferase 1, mitochondrial	Trnt1	7	5013000	3935100	5393600	3482100	5857700	2965300	4559000	5634600	5288600	7359800	4287100	6951200	3630500	4694100	4042000	3188600
Q91WS0	CDGSH iron-sulfur domain-containing protein 1	Cisd1	7	136230000	90949000	102060000	87788000	103060000	121850000	91537000	111910000	98755000	112090000	119340000	100860000	87052000	109670000	136650000	139200000
Q8VEK0	Cell cycle control protein 50A	Tmem30a	7	26775000	14662000	16399000	17134000	23210000	21388000	21751000	26391000	21026000	13524000	22329000	22150000	15279000	16905000	22565000	22446000
A0A1D5RM23	Cleavage and polyadenylation specificity factor subunit 5	Nudt21	7	14062000	8280900	12189000	7561800	14389000	12786000	12589000	15267000	13372000	14821000	15723000	15321000	8288600	12782000	13189000	12983000
Q06890	Clusterin;Clusterin beta chain;Clusterin alpha chain	Clu	7	15544000	11954000	11849000	13337000	12125000	14595000	16591000	12016000	19321000	17425000	11064000	10762000	12267000	14487000	11937000	13175000
A2A998	Complement component C8 alpha chain	C8a	7	2009000	2743800	1614500	3302500	2536200	2400400	3106900	2392200	5068600	4074600	2854600	4552400	3083100	3089500	2021400	2827100
Q6A0A9	Constitutive coactivator of PPAR-gamma-like protein 1	FAM120A	7	779350	8627600	707750	3053400	638040	821790	603660	147941	734530	116128	143516	134110	2005000	135792	113190	152277
D3YY50	Copper homeostasis protein cutC homolog	Cutc	7	15680000	14803000	18270000	12651000	13478000	15885000	13436000	15942000	12185000	12987000	11376000	13672000	8824900	16098000	15388000	12999000
P97792-2	Coxsackievirus and adenovirus receptor homolog	Cxadr	7	6248000	4122200	4956400	4322400	6079900	7533000	6862600	7866000	7856000	8414500	7098600	8471300	4622600	6515500	6620500	8051100
P47941	Crk-like protein	Crkl	7	9427600	4975700	8991200	5625800	10283000	7818300	8512000	10200000	8977000	11239000	9049500	9478500	7301500	9222400	9411600	9393200
Q9DCT8	Cysteine-rich protein 2	Crip2	7	46202000	33322000	38135000	32162000	48193000	46684000	39234000	52102000	56390000	53738000	51410000	62828000	33728000	48880000	56947000	54263000
Q9CYA0	Cysteine-rich with EGF-like domain protein 2	Creld2	7	6397300	3168000	5615500	5125600	11395000	7382900	8659000	11488000	14790000	9674300	8795500	17349000	5223800	6736500	6903600	8831600
Q9CQX2	Cytochrome b5 type B	Cyb5b	7	180060000	94804000	141390000	113840000	112960000	140360000	108870000	156940000	93107000	102310000	152540000	146700000	89566000	123030000	192700000	190310000
P62897	Cytochrome c, somatic	Cycs	7	435380000	181690000	320580000	216450000	514070000	325890000	295340000	479370000	309560000	388190000	438360000	429530000	206800000	347870000	416830000	433730000
P12790	Cytochrome P450 2B9	Cyp2b9	7	159430	10923000	78066	8493200	157966	179840	124630	147941	159978	116128	143516	134110	218890	135792	113190	152277
O09158	Cytochrome P450 3A25	Cyp3a25	7	562360	15210000	67047.2	12455000	157966	347070	1350000	147941	3145900	2041000	143516	1155000	12537000	620300	1756800	152277
B2ZRS5	DEP domain-containing mTOR-interacting protein	Deptor	7	3811700	5830400	3358600	5753300	2502300	4199300	4273600	2967500	4912200	4730500	3657500	3624800	4329100	2680200	2416300	2996100
Q99KV1	DnaJ homolog subfamily B member 11	Dnajb11	7	16103000	10824000	16874000	11613000	16119000	14416000	19015000	14067000	24575000	22519000	19075000	24388000	12428000	17250000	16276000	17653000
Q91YW3	DnaJ homolog subfamily C member 3	Dnajc3	7	7643700	11535000	7329400	10993000	9378300	8892200	11541000	6504400	15836000	14317000	10044000	11203000	14573000	14262000	12158000	8236700
V9GXP8	ELKS/Rab6-interacting/CAST family member 1	Erc1	7	3104200	2713900	2375200	4914800	2065600	2537500	3265700	2200900	2897500	2618800	2932300	4006800	2350400	2477200	2216500	3506900
Q9Z0J0	Epididymal secretory protein E1	Npc2	7	17824000	9897900	16396000	10490000	18448000	21883000	14450000	21424000	21507000	24747000	24604000	24981000	8946700	16510000	16419000	21791000
Q8R180	ERO1-like protein alpha	Ero1l	7	8997200	4469400	9735500	5627900	9520900	6999700	11154000	8852300	8996000	12567000	7004000	9603300	6546900	10376000	7173900	7905100
P51658	Estradiol 17-beta-dehydrogenase 2	Hsd17b2	7	379090	11215000	981050	7712000	2067800	335200	3200500	1903300	2753300	2093400	1446200	1459600	16138000	2588700	1834600	416290
Q99L45	Eukaryotic translation initiation factor 2 subunit 2	Eif2s2	7	9381700	16783000	11723000	14832000	14544000	11654000	12882000	9505000	13214000	13270000	11302000	11962000	15152000	13585000	10189000	12690000
O70194	Eukaryotic translation initiation factor 3 subunit D	Eif3d	7	737490	10881000	4496800	15921000	157966	3952200	5618100	3847400	4145400	7037500	4970600	1342500	12499000	5324800	1647800	152277
P56213	FAD-linked sulfhydryl oxidase ALR	Gfer	7	17385000	8634900	13822000	10034000	18612000	16264000	10911000	16036000	15100000	12693000	15011000	14804000	9435600	13311000	14842000	17608000
A0A0G2JG00	Far upstream element-binding protein 1	Fubp1	7	7783000	4953000	5853500	4806200	7449800	6520300	5359000	9524800	8205100	6261400	7362700	7478100	5401600	5495000	6874600	7752100
Q05816	Fatty acid-binding protein, epidermal	Fabp5	7	12743000	9556500	17418000	6228800	12152000	14668000	23081000	28674000	53471000	41786000	14260000	48868000	14327000	18241000	25751000	38029000
Q8CIB5	Fermitin family homolog 2	Fermt2	7	103804	8226200	67047.2	6973900	157966	125371	124630	147941	1289100	116128	143516	134110	7497700	135792	519560	152277
Q9R0N0	Galactokinase	Galk1	7	246470	21435000	1305200	28089000	157966	1494600	882070	531960	917560	1080900	1547100	914910	15091000	3214600	1839800	1920000
Q6P8Q0	Glutathione S-transferase	Gsta1	7	291070000	147270000	317380000	153670000	210160000	215900000	66621000	157520000	38349000	227170000	131510000	42510000	47624000	185160000	130580000	163410000
P48774	Glutathione S-transferase Mu 5	Gstm5	7	5713700	4660600	6528500	4209300	3655200	2405400	4547800	4426900	4684500	3395400	4524800	3314000	2942500	5136500	3665600	3927000
Q9CZD3	Glycine--tRNA ligase	Gars	7	7624200	7291600	9363700	8144400	13348000	7662300	9495100	11279000	8542800	9432200	10488000	10110000	9749400	9405400	10045000	9589800
D3YVW2	Golgi integral membrane protein 4	Golim4	7	3208600	1598100	2952200	1203400	1382800	2138900	1741100	2579600	2024700	2401900	1998000	2039300	1837600	1834800	3018200	2614800
Q8VEB4	Group XV phospholipase A2	Pla2g15	7	8573900	4488700	7643200	4925300	9117400	8683200	6045300	7842700	8806800	7250800	8249400	10277000	4618100	6614000	6948500	7249300
B1AT92	Growth factor receptor-bound protein 2	Grb2	7	6634900	3745500	5416400	4272700	6639400	7172300	5470000	8443000	5532700	5638000	5440900	6484600	3548300	5252100	4794600	6468600
Q05915	GTP cyclohydrolase 1	Gch1	7	8296800	7000900	6671000	7041900	7112800	6952400	7992000	5843300	9342100	7850900	5792100	6679300	5817100	6149200	8157100	6218100
Q9CQC9	GTP-binding protein SAR1b	Sar1b	7	72283000	39368000	65547000	42706000	79983000	59627000	65859000	66821000	57080000	51072000	71395000	51701000	41460000	62062000	52009000	58497000
P70333	Heterogeneous nuclear ribonucleoprotein H2	Hnrnph2	7	1969900	17385000	2564100	20916000	574880	4595500	4866500	1293700	5982100	3495900	464740	1689400	19414000	2371100	3919500	1114300
Q00PI9	Heterogeneous nuclear ribonucleoprotein U-like protein 2	Hnrnpul2	7	5838600	7802400	6849900	8447700	7486300	7961300	8829800	4321400	8053300	7360400	7023300	6741100	9407100	7633200	8109900	6610700
Q61081	Hsp90 co-chaperone Cdc37;Hsp90 co-chaperone Cdc37, N-terminally processed	Cdc37	7	6538000	8211700	6351000	7120900	6347300	8109000	7324200	5135200	7464000	7411200	5825100	5519400	8787900	7036300	7926900	7685400
A0A0A6YY53	Immunoglobulin gamma-2A chain C region secreted form	Ighg2c	7	14974000	11164000	12051000	6862200	7996500	7623600	11136000	7546900	23831000	91007000	33543000	23129000	6337000	4586600	16998000	1472100
Q61249	Immunoglobulin-binding protein 1	Igbp1	7	3346300	3841400	4965400	3330600	157966	3882800	4533400	2204800	5329900	4371700	3148900	3739100	4972000	3693400	3688500	3872600
O35344	Importin subunit alpha-4	Kpna3	7	4089000	3830100	3475900	4250200	3250400	3107500	4349800	2299400	3521000	3931000	4356100	2659600	5267300	4998500	4838200	3420900
P11688	Integrin alpha-5;Integrin alpha-5 heavy chain;Integrin alpha-5 light chain	Itga5	7	8767200	4244800	7665600	5098000	8958000	9475400	7558100	8740300	8881800	10110000	8152700	10611000	4166700	9470300	8687800	8182400
Q9D8C4	Interferon-induced 35 kDa protein homolog	Ifi35	7	9677100	5969900	10613000	5355600	11917000	10164000	11048000	9753600	9058900	10202000	9825600	10394000	7545500	10956000	10278000	8425500
Q9DCX8	Iodotyrosine dehalogenase 1	Iyd	7	50321000	27535000	50533000	28029000	34485000	43388000	42862000	38084000	26234000	35058000	28251000	27666000	19700000	37285000	40994000	43001000
Q99KP3	Lambda-crystallin homolog	Cryl1	7	3968600	10860000	6113900	11526000	1167000	4148900	4885600	1859500	4084700	3780300	4079200	1628400	6614600	7594200	4835500	3955100
Z4YJT3	La-related protein 1	Larp1	7	3693200	4471700	3520800	4002600	4447700	4618500	3927100	2833700	3921000	4887000	4217000	3926800	4591300	3233800	3443400	3586500
Q3UZ39	Leucine-rich repeat flightless-interacting protein 1	Lrrfip1	7	2270800	995930	1730900	1440900	2058400	2506500	1886800	2494200	2055200	2156800	2510900	1918800	1062100	1534900	1807200	2328100
Q505F5	Leucine-rich repeat-containing protein 47	Lrrc47	7	10435000	13153000	6494300	12729000	14013000	9981200	11424000	4183200	10128000	12074000	12274000	7956000	15177000	9778900	13456000	7059200
A0A1L1SRE8	Low-density lipoprotein receptor	Ldlr	7	8010700	6090800	7460600	6811100	8511700	6043800	7181900	5790300	4896900	6263500	7487600	6404700	5017600	7426600	7999400	6901700
Q8BTZ7	Mannose-1-phosphate guanyltransferase beta	Gmppb	7	9029600	7836000	8893700	9979600	12009000	10144000	12226000	14313000	12477000	7611600	9148800	9774600	7247700	10472000	10296000	11499000
Q9WVQ5	Methylthioribulose-1-phosphate dehydratase	Apip	7	19297000	9920900	26199000	11689000	23646000	16878000	20780000	24361000	17252000	19453000	18802000	22037000	12234000	17947000	16555000	17709000
Q9DD20	Methyltransferase-like protein 7B	Mettl7b	7	5276800	70069000	5875600	58010000	2832200	6707900	8017700	4792200	10559000	7353800	5992800	7044200	54812000	11653000	8343300	4775200
Q9D6M3	Mitochondrial glutamate carrier 1	Slc25a22	7	103804	26367000	67047.2	11080000	157966	125371	636290	147941	159978	116128	143516	134110	8542100	476810	113190	152277
P62073	Mitochondrial import inner membrane translocase subunit Tim10	Timm10	7	15437000	15410000	10077000	14458000	13012000	14750000	11355000	18059000	11291000	12092000	15936000	15745000	7261100	14653000	12459000	16837000
Q3THE2	Myosin regulatory light chain 12B	Myl12b	7	24469000	16474000	25344000	16514000	24780000	28183000	27335000	19825000	26211000	27653000	22912000	26568000	24372000	28237000	31726000	28083000
P62774	Myotrophin	Mtpn	7	53884000	30520000	45313000	32023000	56560000	37686000	36584000	48289000	37362000	45444000	43907000	44812000	35081000	38441000	46845000	41165000
Q8BFR4	N-acetylglucosamine-6-sulfatase	Gns	7	10323000	5357800	10692000	5662500	16580000	10829000	9646500	11375000	10504000	11942000	10782000	12909000	5674700	9944000	10267000	10422000
A0A0R4J0B4	N-acylneuraminate cytidylyltransferase	Cmas	7	11514000	8154200	12619000	8765500	13034000	9154700	10086000	9759400	10145000	11834000	11266000	13057000	10761000	11838000	10450000	11791000
Q64669	NAD(P)H dehydrogenase [quinone] 1	Nqo1	7	10081000	5122500	11799000	5614100	8135600	8155100	4506800	7775500	4570700	7564300	7120200	5425500	4552500	5428600	6512000	5849100
Q8K4Z3	NAD(P)H-hydrate epimerase	Apoa1bp	7	50764000	51398000	52780000	52407000	73737000	49801000	64481000	47978000	56223000	43467000	61005000	43775000	51067000	64490000	67293000	61254000
Q7TMF3	NADH dehydrogenase [ubiquinone] 1 alpha subcomplex subunit 12	Ndufa12	7	3184900	8030300	2637900	7837600	1982500	3915800	3244200	3375000	2717700	1495000	2513200	1693500	4552900	3099200	2941400	5432900
Q9CR61	NADH dehydrogenase [ubiquinone] 1 beta subcomplex subunit 7	Ndufb7	7	17959000	10084000	17000000	11477000	11465000	16382000	15672000	15639000	11184000	6454400	12056000	11346000	8214200	11632000	19475000	24625000
Q9D6J5	NADH dehydrogenase [ubiquinone] 1 beta subcomplex subunit 8, mitochondrial	Ndufb8	7	12048000	11810000	13053000	11010000	7538600	14440000	12450000	9458400	9027300	4740600	8546400	6641100	8470000	10245000	21786000	17366000
Q99K48	Non-POU domain-containing octamer-binding protein	Nono	7	9757900	11390000	8024900	13984000	8196100	10219000	9118900	10423000	11898000	14466000	13181000	13316000	10987000	11992000	8652000	10318000
Q9D6Z1	Nucleolar protein 56	Nop56	7	3369900	4001900	3414700	3693600	2913700	2752000	3052400	1588400	4247000	4696000	3022000	3509700	5557900	2822500	3742300	3032300
Q7M739	Nucleoprotein TPR	Tpr	7	3757400	3023900	4422500	3529200	3589800	4879400	5114000	3762700	5038800	5743700	3801000	3818400	3781400	4376000	3897500	3174300
P11930	Nucleoside diphosphate-linked moiety X motif 19, mitochondrial	Nudt19	7	3904800	22922000	4797600	16478000	157966	3530100	124630	147941	5690100	4800900	4321600	134110	10390000	4290600	4969800	3418700
Q9CR24	Nucleoside diphosphate-linked moiety X motif 8, mitochondrial	Nudt8	7	12463000	6768600	12482000	7377500	17235000	12002000	12391000	15421000	11801000	13676000	13996000	14324000	6385300	12264000	10220000	11878000
O88531	Palmitoyl-protein thioesterase 1	Ppt1	7	40243000	21127000	34755000	21285000	55105000	35583000	35841000	45734000	51402000	52116000	46204000	54093000	22316000	33803000	36459000	34021000
Q8BG07-2	Phospholipase D4	Pld4	7	6519500	4265600	5996400	3607000	7351800	7473300	5953500	7256100	7023900	8815700	7305000	9474700	4667800	3916500	5934500	4671900
Q8VDG7	Platelet-activating factor acetylhydrolase 2, cytoplasmic	Pafah2	7	1989100	6005800	3408400	8453700	157966	1766200	2597000	147941	2408700	1726800	249160	1196300	7933500	2986100	2430700	2301900
Q8CG72	Poly(ADP-ribose) glycohydrolase ARH3	Adprhl2	7	6167700	3403800	6627300	3208800	8183900	5926100	5701800	7311200	6223500	6264300	6968600	7822600	5287400	5858200	5866000	5932700
Q8BTS0	Probable ATP-dependent RNA helicase DDX5	Ddx5	7	103804	18712000	67047.2	12504000	157966	276360	124630	147941	159978	116128	143516	134110	7280300	311560	768270	441230
Q99KK9	Probable histidine--tRNA ligase, mitochondrial	Hars2	7	12038000	9717500	13003000	5275300	17881000	9666600	12246000	11064000	8109000	13290000	11005000	11538000	8495100	11011000	9690700	13200000
P99026	Proteasome subunit beta type-4	Psmb4	7	88716000	41831000	89985000	45488000	97083000	85927000	78885000	88505000	65314000	76976000	78955000	87210000	46700000	77086000	78242000	85020000
A0A087WNP6	Protein CDV3	Cdv3	7	18692000	8500000	18318000	11997000	18374000	18081000	14818000	18951000	20609000	17202000	18065000	21757000	12553000	14213000	19082000	20479000
O88668	Protein CREG1	Creg1	7	118710000	54250000	94532000	53244000	138450000	91155000	89917000	109230000	100220000	120560000	106600000	111450000	52899000	105170000	87451000	98558000
Q9D0F3	Protein ERGIC-53	Lman1	7	10480000	33314000	17960000	30723000	7622200	14035000	23479000	9879400	26841000	12753000	13357000	14768000	26146000	18849000	17610000	13757000
P61327	Protein mago nashi homolog;Protein mago nashi homolog 2	Magoh;Magohb	7	15177000	7367500	15617000	7407000	20079000	13324000	13105000	15581000	13164000	17888000	13693000	18276000	8514100	15756000	12203000	12964000
Q3UPH1	Protein PRRC1	Prrc1	7	4694900	6474800	5999400	6139700	4901000	5110700	9173200	5073100	8340700	6307800	6545500	5831900	6442400	7540100	5507800	5409100
P61458	Pterin-4-alpha-carbinolamine dehydratase	Pcbd1	7	303880000	154610000	292280000	169050000	277680000	279540000	188010000	304250000	213170000	243540000	282040000	273580000	166130000	214870000	282580000	298180000
A0A0R4J1R7	Pterin-4-alpha-carbinolamine dehydratase 2	Pcbd2	7	38474000	18407000	28510000	20052000	38818000	38441000	28386000	42857000	34617000	40008000	35290000	41890000	21344000	33607000	37873000	36888000
F6QYF8	Puromycin-sensitive aminopeptidase	Npepps	7	103804	5237600	67047.2	5412600	157966	125371	124630	147941	159978	116128	143516	134110	5240400	135792	113190	152277
E9Q715	Putative RNA-binding protein Luc7-like 2	Luc7l2	7	3371800	1906100	2963300	1993800	2990800	4348700	3284800	4000300	3431900	3360700	3529200	3883900	1939300	2874400	2480200	4478500
Q9D031	Ras suppressor protein 1	Rsu1	7	5508200	4868700	5857200	5185000	4970700	6490800	6842500	4617500	6217200	7663700	7644100	6562400	6474500	6240400	6701900	6291700
Q9DCV4	Regulator of microtubule dynamics protein 1	Rmdn1	7	15166000	27728000	23120000	24371000	13931000	16629000	20871000	13994000	19624000	14930000	13757000	10903000	22745000	23608000	15763000	14236000
Q61599	Rho GDP-dissociation inhibitor 2	Arhgdib	7	19795000	11056000	25485000	13486000	26653000	25980000	22372000	25003000	20962000	33463000	23468000	25841000	12595000	19407000	18627000	17736000
P52760	Ribonuclease UK114	Hrsp12	7	1696700000	889890000	1662500000	917370000	1723400000	1526400000	1520300000	1541000000	1070500000	1370400000	1216600000	1049200000	706790000	1454800000	1354100000	1300100000
A2A547	Ribosomal protein L19;60S ribosomal protein L19	Rpl19	7	11827000	14469000	7904200	14440000	8172000	7365000	10815000	11287000	12014000	7760400	9734300	10965000	14540000	6747600	6374700	6942300
G3UXT7	RNA-binding protein FUS	Fus	7	19337000	14219000	14472000	14448000	14211000	19926000	17420000	13652000	22192000	21939000	23183000	23203000	15227000	16731000	18997000	22247000
P60122	RuvB-like 1	Ruvbl1	7	1193400	5592800	3892700	4455600	1620500	4806800	13640000	1336200	11668000	6230500	5615700	4798600	6620800	8982500	6315700	4727600
Q9D5J6	Sedoheptulokinase	Shpk	7	103804	8688000	67047.2	9205800	157966	125371	1484500	147941	448840	116128	143516	134110	6349300	1321000	592790	152277
P17563	Selenium-binding protein 1	Selenbp1	7	406540000	185090000	378920000	191710000	446750000	344570000	309360000	420740000	235330000	344830000	314830000	307840000	204120000	384850000	371910000	385700000
Q9JHW4	Selenocysteine-specific elongation factor	Eefsec	7	103804	3799600	67047.2	3281200	157966	125371	124630	147941	159978	116128	143516	134110	3268200	135792	113190	152277
Q9JIY5	Serine protease HTRA2, mitochondrial	Htra2	7	6779200	6084400	7429000	6393200	7513600	7840700	6984600	5760900	6199800	7239900	7128300	5591900	5790100	9409700	7296200	6989400
F7BX26	Serine/threonine-protein phosphatase;Serine/threonine-protein phosphatase 5	Ppp5c	7	3817100	3582700	3671900	3603500	157966	3541800	3720700	4843300	3852600	3936500	4153400	2785700	4090500	4248600	3745100	3185800
P70665	Sialate O-acetylesterase;Sialate O-acetylesterase small subunit;Sialate O-acetylesterase large subunit	Siae	7	11799000	5669500	8694500	6138700	12965000	11009000	8666400	10097000	10614000	8458600	12689000	12379000	5606600	10600000	10414000	11590000
B7ZC18	Signal transducer and activator of transcription;Signal transducer and activator of transcription 3	Stat3	7	103804	3846100	67047.2	4870200	157966	125371	124630	147941	159978	116128	143516	134110	3532200	135792	113190	152277
P63163	Small nuclear ribonucleoprotein-associated protein N;Small nuclear ribonucleoprotein-associated protein B	Snrpn;Snrpb	7	23261000	11795000	17694000	13897000	24380000	19547000	16914000	23433000	21677000	26911000	22318000	25497000	14513000	19884000	18764000	21906000
A0A0B4J1E2	SNW domain-containing protein 1	Snw1	7	3337900	2432600	3618800	2905800	7467000	3327200	3438600	2809800	3208200	4224500	5490800	3775000	2390800	4487200	3783500	3111600
Q9WTX5	S-phase kinase-associated protein 1	Skp1	7	36480000	19372000	36646000	20003000	36223000	35506000	31957000	37048000	26046000	27625000	31211000	31282000	18157000	28993000	32813000	37728000
Q8R0X7	Sphingosine-1-phosphate lyase 1	Sgpl1	7	103804	16943000	67047.2	6684300	157966	787120	124630	147941	159978	116128	641980	623690	9019200	641700	1387500	152277
E9Q4Q2	Splicing factor 1	Sf1	7	11932000	8093000	8928200	8414800	8314800	10883000	11369000	12955000	13546000	12701000	12704000	11685000	7861400	9361300	9250300	9757200
Q9ESP1	Stromal cell-derived factor 2-like protein 1	Sdf2l1	7	10205000	6632900	7111000	6475500	9371700	9484900	13714000	11808000	21413000	15565000	13113000	20086000	8209300	11412000	11510000	13963000
Q9D3L3	Synaptosomal-associated protein;Synaptosomal-associated protein 23	Snap23	7	13600000	8300600	10180000	7071400	7809500	12994000	11329000	10837000	12290000	10601000	10735000	12448000	7987900	10647000	11385000	11437000
G3X8X1	Tetratricopeptide repeat protein 39C	Ttc39c	7	103804	5988200	67047.2	7662800	157966	125371	1484800	147941	1874500	116128	143516	134110	10849000	135792	113190	152277
P10639	Thioredoxin	Txn	7	1278100000	612690000	1208500000	702850000	1370900000	1081800000	922800000	1397800000	921340000	944390000	988280000	1038900000	634720000	929270000	1167600000	1168900000
P20108	Thioredoxin-dependent peroxide reductase, mitochondrial	Prdx3	7	258470000	120670000	252150000	129960000	327570000	221990000	201940000	269500000	209760000	226740000	251320000	254020000	120770000	183240000	195080000	216190000
Q569Z6	Thyroid hormone receptor-associated protein 3	Thrap3	7	5921600	3698500	4927600	5099500	5153800	7006300	5462500	4751800	6183000	5617400	5787700	5879200	3984700	5298300	4911500	6119800
Q9WVA4	Transgelin-2	Tagln2	7	10476000	13152000	11281000	10844000	9956200	13045000	11847000	9588600	13869000	17688000	10960000	10524000	13317000	13244000	11769000	10202000
Q9D1D4	Transmembrane emp24 domain-containing protein 10	Tmed10	7	56320000	33977000	48680000	35719000	41092000	51111000	51329000	53663000	47964000	43025000	44988000	53890000	31785000	45006000	50062000	52931000
Q99KF1	Transmembrane emp24 domain-containing protein 9	Tmed9	7	29862000	20828000	28301000	21186000	23385000	28256000	27819000	32609000	35721000	23903000	28330000	40217000	21607000	30596000	34605000	30889000
P07309	Transthyretin	Ttr	7	252910000	95534000	212540000	99872000	184570000	198800000	158210000	226480000	146950000	134490000	153130000	169740000	84627000	147540000	172090000	177560000
Q6IRU2	Tropomyosin alpha-4 chain	Tpm4	7	11725000	5229900	10464000	6747300	11891000	13118000	8875400	12896000	13319000	14531000	13657000	14993000	6981400	9137600	9842300	11989000
A0A0R4J1B1	Troponin T, fast skeletal muscle	Tnnt3	7	103804	211200	67047.2	235301	157966	125371	124630	147941	159978	116128	143516	134110	182460	135792	113190	152277
Q8C5W3	Tubulin-specific chaperone cofactor E-like protein	Tbcel	7	2536000	5110600	4862700	5686300	157966	3189100	6332200	2277000	3970900	3616600	3694900	2048300	8078300	4763200	5440100	4528700
Q91WQ3	Tyrosine--tRNA ligase, cytoplasmic;Tyrosine--tRNA ligase, cytoplasmic, N-terminally processed;Tyrosine--tRNA ligase	Yars	7	7794600	7666500	7532300	7735300	8596200	5180700	7886100	7392600	9137000	8766900	7522500	7942100	9287800	7404800	8401400	5352700
Q8K1Z0	Ubiquinone biosynthesis protein COQ9, mitochondrial	Coq9	7	32189000	23200000	30877000	23825000	26127000	29090000	28709000	29841000	23711000	27917000	29757000	21361000	20151000	31437000	21693000	27074000
Q7TQI3	Ubiquitin thioesterase OTUB1	Otub1	7	3694400	11298000	3574800	9473300	795740	3623300	6284100	2495500	5957000	5176000	3101300	3074600	11911000	5240200	6161900	4360900
Q62452	UDP-glucuronosyltransferase 1-9	Ugt1a9	7	3792500	23511000	8582300	14442000	4016900	2902500	4502200	1352400	3742900	8287500	2098000	1508100	8874700	11088000	6186400	3886200
Q9CQE8	RNA transcription, translation and transport factor protein	RTRAF	7	12136000	9261100	11939000	9698300	11131000	11803000	11342000	11499000	11073000	10536000	11546000	11471000	10740000	9936500	11216000	10012000
Q8CAP3	UV excision repair protein RAD23 homolog A	Rad23a	7	6281800	3131200	6985700	3007100	5747900	6000700	6002500	8705000	5956900	7120700	7145000	7290700	3224500	6979200	4836200	6020800
P46460	Vesicle-fusing ATPase	Nsf	7	2550400	3875900	4675400	5534700	157966	5534600	4259600	2768700	4476100	5095400	3588100	4093100	4710500	4047500	4514900	152277
G3UX26	Voltage-dependent anion-selective channel protein 2	Vdac2	7	14147000	18139000	12292000	16844000	8889600	13061000	10110000	13114000	8630500	6708700	8467900	8424400	13175000	8275900	16382000	19506000
P62814	V-type proton ATPase subunit B, brain isoform	Atp6v1b2	7	1216900	6624800	4230100	7585000	3607100	4001900	6147700	1658400	8643600	6220200	8412000	3813900	7234100	5585600	3540600	3400000
Q64726	Zinc-alpha-2-glycoprotein	Azgp1	7	12056000	9388300	9927400	8088800	12470000	12912000	12772000	10363000	17920000	17001000	12297000	15439000	9125400	12090000	11914000	11312000
E9Q9P8	RDH16 family member 1	Rdh16f1	7	38944000	47556000	43704000	46910000	34136000	30473000	28331000	27292000	11281000	14534000	30167000	25249000	46403000	38914000	36006000	29758000
Q8R5I6	Glutathione S-transferase Mu 4	Gstm4	7	12558000	16958000	19319000	15145000	9347700	11541000	11440000	9095500	6308100	9205400	7990800	5535100	12330000	14960000	13948000	14014000
Q3U422	NADH dehydrogenase [ubiquinone] flavoprotein 3, mitochondrial	Ndufv3	7	9730600	5503400	6748400	6730300	3961200	9429000	7287400	9910000	7602100	5994800	8982300	7891200	3526800	6272100	8312000	15464000
Q6NXL1	Sec24 related gene family, member D (S. cerevisiae)	Sec24d	7	103804	55633000	67047.2	35497000	157966	125371	3816100	239640	2807900	3302700	143516	324030	21117000	3025800	2599000	3117400
Q3UJB0	Splicing factor 3b, subunit 2	Sf3b2	7	4192700	4607900	3756600	3757100	3492000	4247400	4783500	3127900	7430700	5043900	4358600	2779100	4459700	4635700	1933600	3317800
Q8BJL9	UDP glucuronosyltransferase 2 family, polypeptide B35	Ugt2b35	7	974980	6111500	1554400	5053700	157966	1224100	3174900	147941	2562300	1648300	1490900	134110	7104200	3262000	1873400	1360500
Q9DAK9	14 kDa phosphohistidine phosphatase	Phpt1	6	13372000	5116700	11367000	6478600	13672000	10954000	9108500	12772000	11061000	12354000	13063000	12706000	6532500	10373000	10358000	13429000
Q9CR00	26S proteasome non-ATPase regulatory subunit 9	Psmd9	6	14703000	10341000	15516000	10933000	12383000	13105000	14050000	12787000	14115000	16797000	12693000	12368000	12196000	17169000	16691000	14609000
Q924T2	28S ribosomal protein S2, mitochondrial	Mrps2	6	5499000	3010500	5353300	3856000	6023300	4721100	5034700	5518800	4407900	6126200	5797800	6050500	3843300	5624800	5227700	5404500
Q9CXW2	28S ribosomal protein S22, mitochondrial	Mrps22	6	6315500	4604700	5167900	5277400	5039800	6349600	6006400	5385100	5819100	6405700	7037200	6140400	5098100	5243500	5346800	6090600
Q8VE22	28S ribosomal protein S23, mitochondrial	Mrps23	6	8179100	6215800	10887000	6906600	8895600	8037700	9410000	7354200	7444700	8424200	7761700	7947000	7344800	11217000	8047400	10622000
Q9D125	28S ribosomal protein S25, mitochondrial	Mrps25	6	3754300	3047500	2725500	2918100	3735800	4079400	3676900	4036100	3479700	3936700	3506000	3403900	3419300	3123800	3662800	3327000
Q9CY16	28S ribosomal protein S28, mitochondrial	Mrps28	6	6560800	4697600	6752900	4880000	5811500	8400300	7663900	5685800	6341800	7597400	8308400	6798100	5149600	7024900	7855700	6931700
Q9JIK9	28S ribosomal protein S34, mitochondrial	Mrps34	6	7177100	4941600	6341600	4980400	7783600	5067800	6261400	5683700	4345200	7204900	5756500	5584100	5602400	6381700	5622000	4692600
D3Z7C0	39S ribosomal protein L40, mitochondrial	Mrpl40	6	9760200	5691300	11787000	6413100	13801000	10246000	11336000	10035000	9132700	11406000	10041000	10365000	6453900	10505000	12090000	10658000
Q9CY73	39S ribosomal protein L44, mitochondrial	Mrpl44	6	3638700	2802300	3840300	2805700	4080800	3879800	4443500	4008400	2952000	3841300	3922700	2919600	3586800	3959800	3154800	3249300
P63325	40S ribosomal protein S10	Rps10	6	212660000	137210000	220490000	145360000	211460000	206210000	253440000	234290000	227290000	227970000	198710000	245700000	164240000	192910000	210840000	216070000
P63276	40S ribosomal protein S17	Rps17	6	92938000	55787000	80191000	61418000	98097000	89820000	92774000	100410000	94455000	94711000	87829000	108930000	65834000	67501000	89388000	91343000
P62267	40S ribosomal protein S23	Rps23	6	52431000	66580000	53045000	67996000	68214000	41397000	57619000	71164000	73264000	63463000	77172000	74478000	69808000	42205000	32770000	41145000
Q9D110	5-formyltetrahydrofolate cyclo-ligase	Mthfs;Gm29094	6	9034100	4630200	5867500	5685000	10609000	6635800	6310800	6396400	6293200	7507200	6205300	6144600	4327900	5784900	6784900	6205900
P35979	60S ribosomal protein L12	Rpl12	6	139650000	93880000	127780000	95201000	139820000	124600000	126620000	149720000	143010000	134950000	125680000	160380000	105570000	111100000	125420000	148310000
Q6ZWZ7	60S ribosomal protein L17	Rpl17	6	41271000	47273000	33226000	44764000	37039000	34806000	37543000	45674000	42523000	38585000	31898000	40474000	48782000	30276000	30297000	29049000
P62830	60S ribosomal protein L23	Rpl23	6	31507000	46301000	27947000	44990000	34668000	25730000	37717000	35850000	38894000	32502000	31307000	35358000	47357000	26366000	26661000	25444000
B1ARA3	60S ribosomal protein L26	Rpl26	6	38142000	44587000	26308000	47770000	31716000	26470000	29417000	42149000	42570000	30029000	31822000	38639000	46041000	22425000	27228000	30782000
P41105	60S ribosomal protein L28	Rpl28	6	41311000	60125000	34157000	59784000	33500000	20729000	41608000	49443000	58224000	33532000	41385000	48775000	62905000	30884000	23065000	34262000
A0A2I3BQF4	60S ribosomal protein L30	Rpl30	6	66342000	51822000	62049000	50898000	60360000	54383000	50336000	69556000	66860000	66694000	68067000	87123000	55012000	46981000	53519000	62546000
P62911	60S ribosomal protein L32	Rpl32	6	10700000	20950000	9468700	20777000	10579000	7576800	11093000	11639000	14256000	9784200	11203000	15450000	21409000	8472800	7910600	9714500
Q9JJI8	60S ribosomal protein L38	Rpl38	6	81216000	56098000	70329000	55863000	76867000	77521000	70633000	86095000	79144000	74054000	69888000	77335000	65710000	60072000	74032000	67090000
E9Q4Z2	Acetyl-CoA carboxylase 2;Biotin carboxylase	Acacb	6	17671000	22584000	20663000	7902100	15549000	20576000	19817000	16423000	21036000	17530000	19590000	14267000	11679000	23556000	4168100	13425000
Q9JM76	Actin-related protein 2/3 complex subunit 3	Arpc3	6	11544000	20214000	13883000	20786000	9575500	17702000	20311000	10001000	19256000	18937000	15973000	15356000	21195000	18207000	14948000	19132000
Q64010	Adapter molecule crk	Crk	6	9148500	6249400	8501000	5476300	9204900	6762900	8108300	9895200	8321400	10120000	9107500	9159900	6076600	8494600	6152400	7637000
P97384	Annexin A11;Annexin	Anxa11	6	11069000	7203200	11945000	7682600	9635100	8529400	10397000	7736500	6071300	5313000	6508700	5692300	6361100	8846700	7841700	6833900
A0A0R4J090	Antigen-presenting glycoprotein CD1d1;Antigen-presenting glycoprotein CD1d2	Cd1d1;Cd1d2	6	19001000	9724400	12010000	11771000	17234000	18309000	19168000	18822000	21641000	16661000	16598000	20548000	11615000	19717000	20162000	20916000
Q9D3D9	ATP synthase subunit delta, mitochondrial	Atp5d	6	175250000	112640000	166750000	123140000	184560000	180120000	166020000	160900000	174840000	183080000	201480000	157360000	113270000	183670000	163880000	172140000
Q06185	ATP synthase subunit e, mitochondrial	Atp5i;Atp5k	6	137760000	120390000	122260000	126490000	114320000	123340000	119040000	107090000	122900000	112040000	115710000	105880000	110820000	139890000	104670000	136190000
Q99L88	Beta-1-syntrophin	Sntb1	6	5976400	11764000	5242200	11605000	3989900	4444300	4534600	3835600	4841000	5256500	3824300	3290000	15727000	4550300	2076100	4400500
Q9D8S9	BolA-like protein 1	Bola1	6	17035000	9427700	15459000	9899500	15796000	16750000	12913000	17890000	15090000	16294000	14421000	16160000	9409100	13664000	15434000	17418000
Q8BH59	Calcium-binding mitochondrial carrier protein Aralar1	Slc25a12	6	103804	6596800	2747800	5196500	157966	125371	746760	147941	159978	116128	143516	134110	2255300	643360	2177600	152277
P28651	Carbonic anhydrase-related protein	Ca8	6	18437000	9888300	14799000	9273200	18885000	16700000	18725000	18227000	11533000	14502000	12730000	13887000	9577700	18473000	15777000	14142000
Q91VT4	Carbonyl reductase family member 4	Cbr4	6	23190000	28117000	32105000	27316000	23486000	27599000	31220000	23038000	34082000	32970000	31453000	30172000	29503000	31598000	25395000	30199000
P67871	Casein kinase II subunit beta	Csnk2b	6	9889700	4857800	8015600	6747100	8932100	9512700	7946700	7975900	7391200	7245100	8578900	9039200	6600900	6609100	8677900	9394700
Q91WM2	Cat eye syndrome critical region protein 5 homolog	Cecr5	6	4940500	7752600	5412900	5789300	6360500	4508300	6567600	4680600	5098700	5670600	5866500	5015300	8134600	6711900	4348200	5050400
P60766	Cell division control protein 42 homolog	Cdc42	6	68650000	37768000	67065000	42642000	67812000	65248000	61435000	72940000	61428000	75254000	74264000	72721000	39636000	69902000	61966000	73812000
Q58A65	C-Jun-amino-terminal kinase-interacting protein 4	Spag9	6	2978600	2820600	2787700	3142700	2608300	3024600	3616300	2105100	3998000	3344500	3399800	3295100	3206200	3090700	3027600	3599600
Q8BIQ5	Cleavage stimulation factor subunit 2	Cstf2	6	3213600	2104100	3570800	2019600	3379000	2842000	3598500	3293300	3582100	4682700	4968900	3707900	2467100	3474200	3763000	2624700
P61924	Coatomer subunit zeta-1	Copz1	6	6434400	11777000	6494100	10958000	7577400	7562900	10860000	4117900	8657000	8607200	6631700	7557300	11225000	8167500	9013000	6580200
Q3URS9-2	Coiled-coil domain-containing protein 51	Ccdc51	6	4370500	4008800	4497100	4982400	5272100	4638400	4748000	4663400	5773100	4852100	4589000	5579500	4548100	4339300	4711700	4634300
Q8R5L1	Complement component 1 Q subcomponent-binding protein, mitochondrial	C1qbp	6	181330000	98069000	202580000	100170000	232750000	173530000	199500000	181400000	153270000	165800000	178810000	219110000	94555000	180080000	165240000	199810000
O88544	COP9 signalosome complex subunit 4	Cops4	6	1660700	7013100	1887500	4251200	983920	2197800	3500700	147941	2962100	2668600	143516	134110	6122600	2903200	2392600	152277
Q8C166	Copine-1	Cpne1	6	13273000	6138300	10615000	6506100	15255000	12332000	11267000	13050000	9164600	12629000	9207800	10888000	8037600	12160000	11104000	10088000
Q9WU84	Copper chaperone for superoxide dismutase	Ccs	6	10794000	8783700	11737000	7954900	8475600	13510000	7963400	6535000	9422800	12363000	15386000	12100000	9113700	12564000	10434000	8929700
O08997	Copper transport protein ATOX1	Atox1	6	198580000	105680000	198470000	111170000	208480000	174290000	125900000	194580000	164640000	158750000	156670000	190280000	86834000	109230000	149910000	181030000
Q9D2V7	Coronin-7	Coro7	6	103804	3469800	2347900	2475100	157966	125371	1369500	147941	1895200	116128	1254200	134110	4163400	135792	113190	152277
P50462	Cysteine and glycine-rich protein 3	Csrp3	6	8138100	5461000	13085000	5288100	7074400	7222500	8646700	10422000	9324700	4518500	7210300	10925000	6661700	9423000	10130000	8253000
Q9D881	Cytochrome c oxidase subunit 5B, mitochondrial	Cox5b	6	103260000	60938000	86056000	53720000	67646000	127010000	81794000	100050000	60877000	36347000	81697000	71717000	44704000	59168000	104820000	174040000
P56654	Cytochrome P450 2C37	Cyp2c37	6	533080	40931000	454330	38323000	301870	2069900	2128700	147941	159978	116128	348310	354900	24272000	801010	505040	215380
A0A0R4J119	Cytoplasmic FMR1-interacting protein 1;Cytoplasmic FMR1-interacting protein 2	Cyfip1;Cyfip2	6	103804	2388000	67047.2	2422900	157966	125371	124630	147941	159978	116128	143516	134110	2665700	135792	113190	152277
Q91V12-2	Cytosolic acyl coenzyme A thioester hydrolase	Acot7	6	15930000	9734800	13173000	8944300	11266000	11887000	10370000	12219000	10965000	14858000	13759000	11335000	12648000	13278000	10575000	11923000
Q8N7N5	DDB1- and CUL4-associated factor 8	Dcaf8	6	3538600	4850100	4262600	4841600	2982300	3491100	3784800	1161200	3985700	3180200	4132900	3476100	3347900	3335400	3454200	4702700
Q80WW9	DDRGK domain-containing protein 1	Ddrgk1	6	8997000	6023800	10362000	7484400	7167900	8860500	10797000	8462700	9711600	8897700	10881000	10687000	6059700	8382300	8378500	9314900
Q9CQJ6	Density-regulated protein	Denr	6	10333000	6499400	9332800	6418800	8552400	12026000	8165300	11239000	12275000	10660000	11113000	14838000	5584600	8612300	9831000	11538000
Q9ET22	Dipeptidyl peptidase 2	Dpp7	6	11751000	8492800	6619200	8437100	12909000	8480200	11647000	11186000	13415000	8231000	11465000	13577000	10625000	11883000	12494000	11256000
H7BWY4	Disks large homolog 1	Dlg1	6	4994000	2593600	3709500	3490100	6463900	3948400	5354000	4774800	5042400	5378700	4321300	4800100	3486300	2124200	5312500	4207200
Q62418-3	Drebrin-like protein	Dbnl	6	3306400	4595900	4264000	3440000	4026700	5886800	4337300	2822000	4534200	4784700	4265900	4465000	4109000	3535900	3072700	3814700
Q61510	E3 ubiquitin/ISG15 ligase TRIM25	Trim25	6	2023500	3069400	67047.2	3463500	157966	1443000	2501200	147941	2237200	1926300	143516	1961700	3160300	1646500	1257800	1730100
P46935	E3 ubiquitin-protein ligase NEDD4	Nedd4	6	2383200	3850700	2226800	3520600	1107200	2102400	1617100	1580000	1851600	2241200	2021000	1732500	3965700	135792	113190	152277
Q8CCJ3	E3 UFM1-protein ligase 1	Ufl1	6	620950	5018800	67047.2	4819900	157966	125371	1056100	147941	1135600	917420	143516	483230	5728100	135792	1037700	152277
Q9WVK4	EH domain-containing protein 1	Ehd1	6	288920	5973700	687440	3638000	157966	545990	1150100	147941	823250	696590	715970	563650	4545500	917400	113190	698970
O70251	Elongation factor 1-beta	Eef1b;Eef1b2	6	67263000	79249000	71959000	80094000	82970000	80666000	129760000	61488000	109040000	88763000	80662000	91164000	80217000	89203000	88401000	77068000
Q3UVK0	Endoplasmic reticulum metallopeptidase 1	Ermp1	6	4088300	3627800	3377700	4461500	157966	2257000	1854900	147941	2476300	116128	143516	134110	3149900	1696800	2824500	2720900
Z4YJW0	ER membrane protein complex subunit 1	Emc1	6	1500000	7196600	1940900	5046500	157966	990700	3341900	930890	1680000	1276300	1045500	778270	1778200	1983400	2380800	2157500
P10630	Eukaryotic initiation factor 4A-II;Eukaryotic initiation factor 4A-II, N-terminally processed	Eif4a2	6	7466900	19359000	13354000	15843000	2776600	9954100	13651000	7528300	11567000	10094000	12292000	9535100	18956000	12377000	9593100	9551800
Q9DCH4	Eukaryotic translation initiation factor 3 subunit F	Eif3f	6	2805200	14522000	3374800	13700000	3434900	3339200	11834000	2245800	13976000	5546800	3805300	2978000	15642000	10393000	3950900	3186400
Q9Z1D1	Eukaryotic translation initiation factor 3 subunit G	Eif3g	6	4618900	7474900	3544100	8282500	4981500	6492700	6161900	4598500	7158300	4604700	4584400	6846400	8300800	4772900	8262100	6612100
Q9WUK2-2	Eukaryotic translation initiation factor 4H	Eif4h	6	21628000	14115000	25074000	15932000	18060000	23960000	29856000	17566000	22364000	24379000	20228000	26061000	19684000	26953000	25474000	25215000
Q5RKN9	F-actin-capping protein subunit alpha-1	Capza1	6	9466000	9477600	13145000	9859400	10553000	12465000	13130000	10163000	12744000	14851000	10347000	12291000	13065000	14430000	12286000	11136000
Q8R123-2	FAD synthase;Molybdenum cofactor biosynthesis protein-like region;FAD synthase region	Flad1	6	1098400	5598400	1399800	6316300	1094000	2566400	2890000	147941	2860800	2718500	2095200	1574500	6581600	2202900	1686100	2387100
Q9Z0R9	Fatty acid desaturase 2	Fads2	6	103804	7870100	67047.2	7338000	157966	125371	124630	147941	159978	116128	143516	134110	8256000	135792	113190	152277
P04117	Fatty acid-binding protein, adipocyte	Fabp4	6	28859000	13619000	27284000	13636000	33982000	28334000	20704000	37636000	43034000	40263000	31226000	38043000	18602000	29888000	23596000	29977000
Q9JK38	Glucosamine 6-phosphate N-acetyltransferase	Gnpnat1	6	44696000	29479000	51541000	33981000	34406000	34102000	47548000	50676000	35774000	45257000	38650000	38885000	33835000	43943000	36332000	36456000
O09172	Glutamate--cysteine ligase regulatory subunit	Gclm	6	17963000	24813000	16482000	26461000	26868000	16456000	26070000	21407000	21404000	20806000	15864000	20475000	25153000	27739000	16425000	17481000
Q80W21	Glutathione S-transferase Mu 7	Gstm7	6	22652000	20351000	23840000	19452000	19017000	20399000	19776000	21958000	19243000	27366000	23810000	18206000	20518000	23258000	22929000	25218000
Q3ULJ0	Glycerol-3-phosphate dehydrogenase 1-like protein	Gpd1l	6	1383000	4550600	1376900	4122800	157966	2552500	2492000	886140	2767200	2300800	2110300	1309500	6720200	3432700	2491700	1965700
O70310	Glycylpeptide N-tetradecanoyltransferase 1	Nmt1	6	4671800	5716200	3697200	6472600	3587900	3858200	5526500	4186400	6165200	5305500	4695700	3216400	10795000	5675300	4873100	5190600
Q20BD0	Heterogeneous nuclear ribonucleoprotein A/B	Hnrnpab	6	26873000	35531000	28227000	32308000	25330000	26969000	32500000	18849000	31301000	34718000	32903000	29667000	37333000	33178000	31939000	28013000
F6ZV59	Heterogeneous nuclear ribonucleoprotein D0	Hnrnpd	6	34579000	32774000	34505000	32639000	36739000	33693000	34449000	28585000	31810000	41029000	31391000	32667000	41138000	46224000	35888000	33180000
P43274	Histone H1.4	Hist1h1e	6	116350000	77990000	88548000	68201000	56554000	79362000	82437000	60879000	100250000	68890000	116080000	105540000	80192000	77913000	99281000	153600000
Q91WC0	Histone-lysine N-methyltransferase setd3	Setd3	6	4766600	3653300	6162300	4169300	6990200	5470200	6724500	5597600	4176200	5871000	4266600	5052200	4436400	5033400	5225500	5065100
Q5U5V2	Hydroxylysine kinase	Hykk	6	103804	12489000	43460	6125900	157966	125371	612640	147941	118160	385990	143516	134110	13183000	649140	113190	152277
A0A075B5P4	Immunoglobulin gamma-1 chain C region secreted form;Immunoglobulin gamma-1 chain C region, membrane-bound form	Ighg1	6	47874000	13293000	19217000	12779000	26788000	20903000	16883000	20233000	26877000	6422100	15121000	15485000	5187300	26094000	23847000	6480500
Q60766-2	Immunity-related GTPase family M protein 1	Irgm1	6	103804	10419000	67047.2	6880500	157966	196180	474200	147941	109160	116128	143516	141280	10282000	135792	98364	152277
Q8BKC5-2	Importin-5	Ipo5	6	33782000	83113000	34103000	68208000	27272000	44683000	34652000	33240000	30859000	42607000	13505000	34328000	58087000	28643000	28666000	29520000
O55222	Integrin-linked protein kinase	Ilk	6	103804	5441600	67047.2	3055900	157966	125371	124630	264020	372570	116128	143516	134110	9220400	135792	460820	152277
Q8C0M9	Isoaspartyl peptidase/L-asparaginase;Isoaspartyl peptidase/L-asparaginase alpha chain;Isoaspartyl peptidase/L-asparaginase beta chain	Asrgl1	6	6674600	3960300	6749000	4046400	4923700	5907400	5940600	8271900	4802300	4835600	4992200	4417100	3010300	3671400	5580400	5648800
Q61768	Kinesin-1 heavy chain;Kinesin-like protein	Kif5b	6	357090	3324100	224200	1531800	207320	775640	503100	84186	885440	593790	497320	705710	1815400	628770	451220	534610
Q61792	LIM and SH3 domain protein 1	Lasp1	6	61328000	34291000	47856000	35907000	53409000	62997000	51483000	69239000	52522000	58214000	61615000	69525000	28817000	45281000	46513000	60342000
P32067	Lupus La protein homolog	Ssb	6	5969200	7019700	5838800	6972400	3595200	5319400	6962300	4890400	7057300	8202800	8216300	7027700	8682000	8356300	5974400	7318300
P17047-3	Lysosome-associated membrane glycoprotein 2	Lamp2	6	140370000	79426000	135300000	79217000	132640000	130890000	131520000	124550000	126510000	148480000	125700000	152420000	88804000	130300000	111420000	112200000
Q9DB27-2	Malignant T-cell-amplified sequence 1;Malignant T-cell-amplified sequence 2	Mcts1;Mcts2	6	18508000	9183700	17408000	10095000	20073000	16218000	16493000	18459000	14740000	19679000	17754000	18895000	9889400	15972000	16207000	16981000
Q924M7	Mannose-6-phosphate isomerase	Mpi	6	4148500	3734700	3030400	4031100	4598200	3256900	4379900	4832900	4030100	3395200	4133600	3105300	4403900	4293100	3607500	3415400
P41317	Mannose-binding protein C	Mbl2	6	30610000	16091000	26527000	15009000	26260000	21329000	18562000	23554000	17895000	16725000	18443000	23263000	13324000	16972000	22439000	19569000
Q8K310	Matrin-3	Matr3	6	3890300	10784000	5422800	10922000	4234100	5459300	6860600	3650700	5621600	7522600	4698900	4505700	12106000	7729200	5009700	3582600
E9QB02	Methionine--tRNA ligase, cytoplasmic	Mars	6	2748600	6736100	3389200	13737000	2986300	3253000	2348900	4424800	1482900	4255300	4308000	4045500	4149100	3575200	1390400	3694100
Q9D1I5	Methylmalonyl-CoA epimerase, mitochondrial	Mcee	6	52959000	32150000	49040000	32499000	69309000	53139000	50004000	57812000	43804000	49435000	54695000	48330000	31253000	45124000	52520000	54647000
Q9CQT1	Methylthioribose-1-phosphate isomerase	Mri1	6	12635000	8389900	12253000	10296000	14142000	9585500	10817000	7739600	14226000	16396000	15325000	14076000	10909000	16845000	12476000	10722000
Q8R0Y8	Mitochondrial coenzyme A transporter SLC25A42	Slc25a42	6	103804	11487000	67047.2	9787800	157966	125371	124630	147941	494850	116128	143516	134110	13118000	135792	450370	152277
Q9CQ92	Mitochondrial fission 1 protein	Fis1	6	25932000	14536000	24460000	15112000	26628000	21239000	26511000	26082000	21724000	25623000	23915000	25609000	16169000	24228000	20756000	23661000
P62075	Mitochondrial import inner membrane translocase subunit Tim13	Timm13	6	138880000	77787000	134930000	82315000	161270000	151700000	115270000	163150000	140990000	144580000	160160000	161550000	81992000	136800000	118130000	165440000
Q9R1S7	Multidrug resistance-associated protein 6	Abcc6	6	103804	8342100	67047.2	3424500	157966	125371	124630	147941	152430	122580	143516	173580	4357100	149650	193560	152277
Q9CPT4	Myeloid-derived growth factor	Mydgf	6	42792000	22871000	35392000	22454000	39260000	43969000	33937000	52100000	50092000	48489000	44172000	63732000	22051000	38292000	35411000	42583000
P97457	Myosin regulatory light chain 2, skeletal muscle isoform	Mylpf	6	103804	211200	67047.2	235301	157966	125371	124630	147941	159978	116128	143516	134110	182460	135792	113190	152277
Q64191	N(4)-(beta-N-acetylglucosaminyl)-L-asparaginase;Glycosylasparaginase alpha chain;Glycosylasparaginase beta chain	Aga	6	12062000	6770500	11465000	7204200	15471000	11147000	9205400	11366000	13540000	13118000	11426000	13544000	6457000	11054000	11415000	11107000
Q9JHL1	Na(+)/H(+) exchange regulatory cofactor NHE-RF2;Na(+)/H(+) exchange regulatory cofactor NHE-RF	Slc9a3r2	6	3642000	2104400	2268400	2408000	2664400	4297200	2561300	3804800	3923700	3111400	2969600	3687900	2095700	2943600	3562700	3609100
Q8CC47	N-acetylgalactosamine-6-sulfatase	Galns	6	10717000	6963600	10418000	6282000	19051000	11054000	16595000	14387000	12620000	11334000	15293000	17048000	4766700	16133000	13743000	11409000
Q9D1H6	NADH dehydrogenase [ubiquinone] 1 alpha subcomplex assembly factor 4	Ndufaf4	6	8199000	6316000	7404200	5209700	7639000	8318500	8769400	6776500	10091000	9907600	7590800	9355900	6570200	7528500	9340200	10595000
Q9DCJ5	NADH dehydrogenase [ubiquinone] 1 alpha subcomplex subunit 8	Ndufa8	6	27564000	34189000	19514000	28873000	12566000	25153000	27663000	22968000	24810000	8061900	15702000	13957000	24465000	15335000	31388000	37331000
Q9CQJ8	NADH dehydrogenase [ubiquinone] 1 beta subcomplex subunit 9	Ndufb9	6	7451100	10694000	7366400	11063000	4431000	8049400	7665200	6712500	6263200	3889700	5629100	4677400	7996300	6708100	9309100	11128000
Q9CQ54	NADH dehydrogenase [ubiquinone] 1 subunit C2	Ndufc2	6	11171000	20913000	7051200	16388000	6260700	8535800	8037500	7548000	6644500	3414100	3318000	3381500	14491000	6524500	10087000	11276000
A6PWC3	Nardilysin	Nrd1	6	1246100	1974500	1319900	1328200	157966	1974900	1254600	1207700	1613000	1098600	1385800	1756700	2332400	1202100	1597200	1763100
A0A1L1STC6	Nesprin-1	Syne1	6	7364900	4986600	9144100	4771000	12398000	6162800	5760400	9810700	7732300	7103500	7297500	5497500	4956000	10462000	6109100	7235400
Q9EQ80	NIF3-like protein 1	Nif3l1	6	7079200	4307300	7069200	5057900	8322400	6085000	7759900	8755800	7317400	7288300	7315500	6831300	5359600	6237800	7824400	6748300
O35309	N-myc-interactor	Nmi	6	10913000	5695900	11217000	7105100	11052000	13198000	11093000	11242000	10313000	10171000	11410000	12661000	7049800	10977000	11184000	10613000
P60670-2	Nuclear protein localization protein 4 homolog	Nploc4	6	4181000	9155000	3309600	5182100	2874700	3722700	2365700	2624400	2661000	4160300	3138900	2943300	5984500	3455100	4375400	3126500
Q6DFW4	Nucleolar protein 58	Nop58	6	1827200	3050300	1521000	2694600	1702100	2328200	2497700	1475900	2762100	2389400	2470100	2023400	4157100	2218300	3143200	1911600
Q9WV85	Nucleoside diphosphate kinase 3	Nme3	6	10332000	6175800	7286400	7158200	8445600	10374000	7763200	11150000	9268200	8585300	9771200	10939000	5503000	7499900	7241700	10071000
Q3TF41	Nucleosome assembly protein 1-like 1	Nap1l1	6	24855000	14571000	30368000	16048000	33871000	20933000	29756000	21599000	18905000	28551000	23308000	24093000	17276000	25960000	25720000	27361000
Q3B7Z2	Oxysterol-binding protein 1	Osbp	6	2468900	5684000	4029400	5075300	808320	2820200	3980600	2839500	3742000	3969100	3307200	3108200	4338700	3543300	2864700	1968300
Q9Z0K8	Pantetheinase	Vnn1	6	11327000	10161000	14325000	13738000	4264800	5917500	5158500	2632400	2315300	116128	5041300	3026400	7443800	3523900	5549600	6134900
Q9D1M7	Peptidyl-prolyl cis-trans isomerase FKBP11	Fkbp11	6	5143400	3081900	4509600	3661800	10381000	6679900	9914600	12930000	15798000	11141000	8238800	16507000	5351300	6728100	6243400	6980500
P97865	Peroxisomal targeting signal 2 receptor	Pex7	6	7555700	4704200	9528400	5231100	9121900	6221300	3465200	10007000	5132400	6235600	5648100	6863700	5137600	5949800	5603400	6394300
Q7TSV4	Phosphoglucomutase-2	Pgm2	6	5875700	4268300	6463800	4602100	8520700	5880100	6322800	8428500	8766600	6891900	6024100	8774300	4537100	7852700	6162300	5852700
O70250	Phosphoglycerate mutase 2	Pgam2	6	103804	315390	67047.2	235301	750140	125371	124630	354970	45807000	285350	143516	134110	333790	135792	451240	152277
Q61990	Poly(rC)-binding protein 2	Pcbp2	6	4759300	19171000	7562700	19422000	4486900	5996200	7005600	5058300	7679800	7674100	6688900	6104900	20487000	6989300	6430300	4821300
Q3UEB3-3	Poly(U)-binding-splicing factor PUF60	Puf60	6	2134300	3392400	2566600	3917800	4054400	3177900	3306900	3404600	3708700	3455400	3331400	3695600	3146300	4393900	2617600	2699100
P70398	Probable ubiquitin carboxyl-terminal hydrolase FAF-X;Ubiquitin carboxyl-terminal hydrolase	Usp9x	6	6953800	6615500	8738500	5570100	12958000	6132500	9216100	9652600	10570000	7906800	6587900	8472100	7197300	6727600	8262900	8285100
D3Z3S1	Prolactin regulatory element-binding protein	Preb	6	103804	3944100	67047.2	3817300	157966	1014100	1439200	147941	1286900	116128	143516	134110	3551700	1588900	1461000	726010
Q60692	Proteasome subunit beta type-6	Psmb6	6	65520000	31545000	61590000	33099000	85154000	53604000	51414000	63401000	46471000	63361000	60977000	57204000	35080000	59309000	59349000	56604000
Q8CJG0	Protein argonaute-2	Ago2	6	5718400	2864900	3912700	2856600	6052100	5603100	4526600	3620000	3680300	3997200	3978500	5154300	2760700	4281600	4203100	4345200
Q9CR98	Protein FAM136A	Fam136a	6	32299000	17023000	30940000	19013000	34198000	35168000	27130000	41022000	31520000	30220000	36328000	36473000	17873000	29738000	25973000	34784000
Q9D6U8	Protein FAM162A	Fam162a	6	39821000	22194000	36861000	22267000	33462000	37313000	30471000	38800000	33205000	37299000	35868000	40296000	21326000	34518000	37746000	39054000
Q9WVE8	Protein kinase C and casein kinase substrate in neurons protein 2	Pacsin2	6	10879000	10921000	7012800	9005300	7437900	11079000	8128000	8347400	9485200	9237700	7447700	10401000	9192400	7457300	10101000	9415900
O88952	Protein lin-7 homolog C	Lin7c	6	7647800	4102800	6638600	5201700	6610500	7326400	6714000	6453200	7630100	7110700	8032700	7685400	4466600	6538300	7802500	7738400
Q91VH6	Protein MEMO1	Memo1	6	3451100	5302300	2903400	4878200	3289100	1699000	5386600	3666700	3066100	3649500	2819400	1810400	6058400	3035100	2037000	2548800
P61027	Ras-related protein Rab-10	Rab10	6	47721000	38354000	39813000	35463000	29541000	52984000	47913000	60052000	51134000	56463000	55329000	71695000	42426000	52327000	41540000	55910000
Q9JM62	Receptor expression-enhancing protein 6	Reep6	6	66291000	155890000	62096000	137980000	58946000	52638000	62012000	51395000	52160000	41652000	42547000	38960000	131190000	60848000	49624000	48439000
Q9EPU0-2	Regulator of nonsense transcripts 1	Upf1	6	103804	4180100	1866300	4715600	157966	1755800	1808000	147941	2539200	2240800	1934300	2027400	4990900	2340500	113190	2233700
H7BWY6	Retinol-binding protein 4	Rbp4	6	50592000	22075000	57461000	22817000	56176000	51982000	44750000	56021000	43613000	54827000	57706000	66250000	22043000	47329000	37280000	47365000
Q8R1Q9	Ribokinase	Rbks	6	5870600	2723400	4854300	2749500	1270100	6127700	5032600	6401000	5864100	7326800	6730800	6227300	3136200	6091300	5620100	5220200
Q8C2Q3	RNA-binding protein 14	Rbm14;Gm21992	6	1194900	1729500	981480	1660600	859480	1858600	1237600	1351500	1821500	1372900	1518600	1521200	1255500	1035500	691190	1386600
Q5SUT0	RNA-binding protein EWS	Ewsr1	6	7318600	5912400	6290200	7097400	7194200	8679700	5521600	6915800	6854200	9148200	7013900	9044300	6645100	5725900	9008800	7467800
Q9WTM5	RuvB-like 2	Ruvbl2	6	3508900	4357300	3763500	4477200	3258900	4590400	5085600	3998300	7007800	5889200	5677900	4271700	5497400	5075200	4194200	4001600
E9Q9F5	Septin-7	Septin 7	6	11221000	8673000	10919000	8724100	11580000	13895000	9430600	12200000	13271000	16100000	12589000	14516000	8530400	10481000	10128000	12626000
P62141	Serine/threonine-protein phosphatase PP1-beta catalytic subunit	Ppp1cb	6	14182000	8537600	16684000	8875500	23675000	12825000	14957000	16861000	12481000	17924000	15190000	19914000	8615900	17640000	15900000	13328000
Q62086	Serum paraoxonase/arylesterase 2	Pon2	6	5332200	5817500	7023300	6884000	4222100	6235700	10115000	3922600	6760800	6618600	5467600	5775200	8026500	8583200	7518400	5932700
Q9JJU8	SH3 domain-binding glutamic acid-rich-like protein	Sh3bgrl	6	31490000	15195000	32942000	16346000	36871000	30984000	21616000	32397000	28112000	33090000	30295000	37178000	15218000	26110000	25032000	25798000
D3YWT0	Signal peptidase complex catalytic subunit SEC11;Signal peptidase complex catalytic subunit SEC11A	Sec11a	6	4609700	10819000	3284400	9538800	5732100	3896800	5766500	4933500	3955600	3730200	3251300	4339200	8806500	6055100	4961500	4643500
Q8R2K3	Single-stranded DNA-binding protein;Single-stranded DNA-binding protein, mitochondrial	Ssbp1	6	17287000	8282200	15248000	9407200	19169000	17508000	15781000	16356000	14454000	14489000	16296000	17908000	11439000	11885000	15769000	19144000
P62317	Small nuclear ribonucleoprotein Sm D2	Snrpd2	6	17669000	9507900	12735000	11430000	19381000	18356000	13745000	19431000	17734000	18203000	18857000	20050000	8204400	16291000	14934000	16966000
Q99JB2	Stomatin-like protein 2, mitochondrial	Stoml2	6	3340100	9077100	6295200	9758200	3570700	5624900	6625000	2511200	5631200	4517400	5371400	4135900	10126000	6504400	6339300	7075300
Q9CZB0	Succinate dehydrogenase cytochrome b560 subunit, mitochondrial	Sdhc	6	59313000	66398000	55225000	68998000	59695000	46780000	44460000	49548000	39741000	48038000	59362000	46689000	60566000	72933000	64562000	61876000
P08228	Superoxide dismutase [Cu-Zn]	Sod1	6	3383200000	1575100000	2558600000	1830200000	3173700000	3036100000	2134300000	3394400000	2411800000	2426800000	2811600000	3005900000	1823600000	2421900000	2810300000	3272900000
Q8JZL3	Thiamine-triphosphatase	Thtpa	6	6483800	3689800	4999200	3428500	3627400	4201800	4598500	6842600	3090300	4403200	3926100	4539800	5638100	4413800	4654900	3927300
A0A087WQE6	Transcription elongation factor B polypeptide 1	Tceb1	6	7380100	9320700	8876300	8123500	6122000	10969000	8032600	8284100	9691500	9768100	11018000	9503300	8173400	8285000	7420100	9695200
Q9CQH7	Transcription factor BTF3 homolog 4	Btf3l4	6	26386000	11232000	20215000	12977000	16577000	21102000	22893000	20245000	16413000	18824000	18786000	20446000	13277000	17773000	22091000	22230000
P42669	Transcriptional activator protein Pur-alpha	Pura	6	357230	35133000	379400	11025000	157966	1399900	432880	368710	1567600	171300	355430	633070	7929400	1802500	1544100	415280
Q8K0Z7	Translational activator of cytochrome c oxidase 1	Taco1	6	7009800	10058000	9679200	8636800	4033500	7257500	7733600	6792500	7487700	6360000	9262600	7381300	9234900	7593700	9108200	7393900
Q62348	Translin	Tsn	6	18382000	14168000	19676000	14368000	16033000	18887000	17926000	19405000	13417000	16379000	16323000	16187000	13427000	16966000	16902000	18771000
Q9CY50	Translocon-associated protein subunit alpha	Ssr1	6	64957000	53512000	60405000	55764000	73966000	73309000	100600000	72749000	94005000	73694000	75922000	87117000	58013000	64979000	73006000	69642000
Q9CXE7	Transmembrane emp24 domain-containing protein 5	Tmed5	6	53840000	36533000	53002000	34828000	38608000	53291000	47461000	49614000	43956000	44085000	43362000	54926000	33097000	46524000	55760000	58330000
Q8JZU2	Tricarboxylate transport protein, mitochondrial	Slc25a1	6	7913300	68983000	12916000	56552000	5039800	7576200	9945100	4820200	8725500	6330900	8603700	7238900	48396000	8796400	11276000	6841700
Q91YR1	Twinfilin-1	Twf1	6	2902700	12124000	3652400	10765000	3106100	5513400	4764800	3218300	5101000	6893000	3202800	4803100	11930000	5814400	3509800	3865600
Q62189	U1 small nuclear ribonucleoprotein A	Snrpa	6	12988000	8281500	9101100	8515500	16012000	12068000	10681000	12731000	13259000	16265000	11989000	15211000	11295000	11481000	14225000	11249000
P57784	U2 small nuclear ribonucleoprotein A	Snrpa1	6	6911900	4955200	5651600	5366400	8886700	6797500	6684300	7012200	6961900	8663100	7073700	7875900	5641600	7071500	7656300	7102100
Q8R1S0	Ubiquinone biosynthesis monooxygenase COQ6, mitochondrial	Coq6	6	1980400	9980700	2648300	7370900	1181500	2423800	3530700	483950	3571800	3382800	3369400	2744700	7300700	4150900	1886200	2220400
E9PYI8	Ubiquitin carboxyl-terminal hydrolase;Ubiquitin carboxyl-terminal hydrolase 14	Usp14	6	1752200	9490200	2483200	11681000	1497700	2542600	3180400	2307300	3085900	2800700	2049500	1790100	11120000	3592400	2781800	2634000
A0A338P786	Ubiquitin-conjugating enzyme E2 L3	Ube2l3	6	17745000	23145000	19251000	24928000	17932000	22696000	24815000	17099000	25941000	20370000	22660000	18414000	23636000	24982000	24317000	21793000
Q922Y1	UBX domain-containing protein 1	Ubxn1	6	6528500	8023900	5834900	8185900	7088400	7443100	7194400	5824800	6372800	5237300	5025200	6217000	8680200	5632500	7142900	6045600
Q8VE95	UPF0598 protein C8orf82 homolog		6	11418000	6789200	10820000	7346200	12554000	10924000	8284200	11306000	8400600	8923600	11078000	9857900	6680000	9778200	6724900	9462900
Q8K2C9	Very-long-chain (3R)-3-hydroxyacyl-CoA dehydratase 3	Hacd3	6	103804	44182000	829960	18380000	157966	125371	1631600	582250	1477700	116128	143516	134110	18083000	658840	1734800	639580
Q8BH80	Vesicle-associated membrane protein-associated protein B	Vapb	6	17818000	14019000	15895000	13834000	9270500	16547000	13684000	11441000	12471000	10950000	13443000	10960000	12036000	11994000	15630000	14043000
P29788	Vitronectin	Vtn	6	11005000	9055800	11145000	9589400	15778000	12508000	11122000	10957000	14574000	14874000	12007000	13453000	9579900	10990000	11790000	10185000
Q60931	Voltage-dependent anion-selective channel protein 3	Vdac3	6	14187000	19666000	14255000	16933000	5102600	11981000	11423000	13658000	7386200	5791900	11048000	8817200	14836000	7469800	15846000	21242000
Q9DCE9	Interferon gamma induced GTPase	Igtp	6	103804	7935200	67047.2	3432100	157966	125371	124630	147941	1403200	116128	143516	134110	4482800	135792	113190	152277
A0A0J9YVJ0	Maltase-glucoamylase	Mgam	6	7147300	3716800	5109600	4032500	8483100	5097000	6548900	4784800	4104100	3289500	4554700	4424900	2897700	5056900	4785900	5434800
Q9EQ08	Heparan N-sulfatase	Sgsh	6	4780400	2729700	3731700	2093300	8243300	4535900	6752900	5618900	7185100	5647100	5019000	7217500	1816300	4663100	4648100	4012000
Q96LX3	Solute carrier family 22, member 30	Slc22a30;Slc22a28	6	1976900	18173000	67047.2	9631100	157966	1756100	124630	147941	2703800	2128800	143516	1600300	6988100	2031600	2590800	152277
O35226-2	26S proteasome non-ATPase regulatory subunit 4	Psmd4	5	11291000	14866000	14620000	16168000	10375000	13316000	16254000	12538000	15602000	13719000	14173000	13916000	17700000	13068000	13847000	15575000
Q3UHX2	28 kDa heat- and acid-stable phosphoprotein	Pdap1	5	17852000	8126100	17062000	10175000	18048000	18415000	12992000	20727000	15518000	15842000	14749000	20067000	9498300	12448000	18355000	18276000
Q8BK72	28S ribosomal protein S27, mitochondrial	Mrps27	5	5907700	5572100	6217100	6717700	7795100	5991000	6990700	4159000	4394100	6588700	6531500	4479300	6972300	7160100	5178800	3865400
Q9D7N3	28S ribosomal protein S9, mitochondrial	Mrps9	5	1142800	4100000	1313300	6133600	1190400	2146400	1986700	1466300	2072300	1540600	1514000	919230	4452800	2001700	1827000	1960800
D3Z3X1	3 beta-hydroxysteroid dehydrogenase type 7	Hsd3b7	5	14085000	18860000	13375000	22406000	18418000	10893000	16705000	14360000	8885700	10119000	16670000	12298000	24331000	16368000	10282000	11222000
Q99N96	39S ribosomal protein L1, mitochondrial	Mrpl1	5	3620300	2747400	3491200	3189900	3578400	4332200	3111700	2784500	3683700	3959900	3885100	3953600	2668700	3027600	3263000	4613700
Q9CQF0	39S ribosomal protein L11, mitochondrial	Mrpl11	5	6672800	3346300	7080800	4523000	8263700	6992100	5773200	6504700	5192800	7029200	6417700	7461800	4372700	6418300	7330200	6312000
Q9D1P0	39S ribosomal protein L13, mitochondrial	Mrpl13	5	4782200	3004700	4516800	2795400	3816900	4614500	3496200	3825300	3717200	3959400	4714500	4842300	3498300	3947400	4626800	5294700
Q9D1B9	39S ribosomal protein L28, mitochondrial	Mrpl28	5	4467800	3601800	3060600	4058600	3987700	3570000	3214200	3808200	3493500	3613500	4526000	3482000	3397700	3534900	3695500	5103800
Q921S7	39S ribosomal protein L37, mitochondrial	Mrpl37	5	4880300	4211800	4802400	5153900	5084400	3387400	5647700	4543400	3463900	4759500	3972500	4476100	4451200	4553300	5767400	4228200
Q8K2M0-2	39S ribosomal protein L38, mitochondrial	Mrpl38	5	9275000	7127500	6924800	6268500	9132400	6040800	6577000	6692500	5567000	6720900	5596700	5775000	4079600	6899200	7098900	7328100
Q9JKF7	39S ribosomal protein L39, mitochondrial	Mrpl39	5	8574000	6333500	8986700	6051500	8831600	10208000	10622000	8652800	7465200	8663500	8409000	8459200	5609900	8759500	9922400	10147000
D3YTQ9	40S ribosomal protein S15	Rps15	5	43670000	30321000	45860000	34089000	50317000	46135000	52623000	45667000	51692000	50555000	45748000	60176000	40256000	46417000	40224000	45067000
P60867	40S ribosomal protein S20	Rps20	5	146890000	96782000	113650000	99080000	113480000	130990000	121140000	151120000	154320000	120420000	142020000	155830000	101090000	103400000	124610000	143320000
Q9CQR2	40S ribosomal protein S21	Rps21	5	90079000	53502000	89089000	56544000	89165000	96702000	89502000	107010000	92523000	93604000	97292000	102820000	58196000	76236000	83641000	101370000
P62754	40S ribosomal protein S6	Rps6	5	100400000	95147000	94315000	88509000	100210000	73665000	92779000	98944000	101830000	91163000	89291000	109100000	98736000	70922000	59312000	65494000
Q9JM14	5(3)-deoxyribonucleotidase, cytosolic type	Nt5c	5	22008000	9855500	16558000	9452700	21084000	13332000	14586000	21447000	12791000	19125000	16033000	14926000	12589000	18335000	18839000	14708000
Q61503	5-nucleotidase	Nt5e	5	3456100	2366900	4683400	2475800	4383000	2303900	3975800	2690100	3143100	3784800	3306900	2506300	2991200	3133900	3655900	3587800
Q9CR57	60S ribosomal protein L14	Rpl14	5	70426000	68475000	45620000	65841000	45143000	32380000	59426000	54395000	61781000	35786000	62079000	64602000	72753000	36323000	44510000	40188000
Q9CQM8	60S ribosomal protein L21	Rpl21	5	27698000	38808000	21875000	35927000	24587000	19859000	24582000	31115000	30305000	22887000	25282000	31920000	41789000	19092000	22671000	20382000
Q8BP67	60S ribosomal protein L24	Rpl24	5	41463000	83910000	31168000	76083000	41518000	25965000	37243000	37835000	47947000	34837000	29368000	38971000	92593000	28139000	26170000	25027000
P61358	60S ribosomal protein L27	Rpl27	5	35437000	41911000	26964000	35947000	33454000	30641000	25054000	42881000	38038000	36267000	30103000	44937000	44195000	22463000	26604000	26985000
P14115	60S ribosomal protein L27a	Rpl27a	5	46798000	94730000	33105000	88597000	50518000	28610000	42863000	47875000	55006000	38046000	36818000	47826000	92907000	28465000	29597000	31747000
P62900	60S ribosomal protein L31	Rpl31	5	77015000	105180000	61657000	98155000	76528000	67542000	85000000	73421000	70476000	71432000	56958000	68058000	106190000	59786000	64432000	57228000
Q9R1Z7	6-pyruvoyl tetrahydrobiopterin synthase	Pts	5	24598000	11168000	21638000	11717000	21112000	18164000	14920000	23518000	13510000	19015000	16265000	18053000	11200000	17944000	17979000	20001000
Q9D2R0	Acetoacetyl-CoA synthetase	Aacs	5	103804	3265200	67047.2	2806400	157966	125371	2000800	147941	159978	116128	970360	134110	7216800	135792	113190	152277
A0A1W2P727	Acetolactate synthase-like protein	Ilvbl	5	3102400	4393800	4898200	4161900	1314400	2733200	3709400	3781400	2589500	3812600	3236800	2676100	3941600	5346600	3165100	3066200
P70158	Acid sphingomyelinase-like phosphodiesterase 3a	Smpdl3a	5	8025000	5564600	11258000	5651300	9786900	8082500	8574600	8359100	5930000	8958300	8830800	9110700	5258300	10585000	8388700	8042100
Q3URE1	Acyl-CoA synthetase family member 3, mitochondrial	Acsf3	5	103804	2514300	1298000	4443600	157966	125371	1184900	1468800	1723600	1133000	1486300	134110	1995400	1270200	1093300	685130
Q91YX5	Acyl-CoA:lysophosphatidylglycerol acyltransferase 1	Lpgat1	5	103804	4161000	3255	8603500	157966	25238	27124	147941	43955	116128	3923.7	4378.9	1809700	23038	26494	18369
Q9CQR4	Acyl-coenzyme A thioesterase 13;Acyl-coenzyme A thioesterase 13, N-terminally processed	Acot13	5	39786000	45043000	61143000	40442000	36700000	39365000	33248000	37850000	39444000	37510000	40583000	31494000	34104000	53006000	31008000	40337000
Q9QYR7-2	Acyl-coenzyme A thioesterase 3;Acyl-coenzyme A thioesterase 5	Acot3;Acot5	5	8343700	8253300	17122000	10368000	868580	2547600	395560	2189900	159978	116128	7398400	134110	2245300	2299900	4605600	3683600
Q9WTL7	Acyl-protein thioesterase 2	Lypla2	5	12071000	12022000	17617000	12789000	13484000	10244000	13349000	11184000	12478000	13392000	14651000	13526000	13883000	14636000	13349000	10943000
P03958	Adenosine deaminase	Ada	5	3895300	3988800	5234900	3490200	6817900	4174200	3698400	5971300	4419900	4388200	4163400	4111100	4225300	4321800	3288500	2951900
Q3UDS7	ADP-dependent glucokinase	Adpgk	5	3143600	3444800	3518700	3174600	157966	4358900	3541800	2787900	3317600	3402100	3587300	3346600	4336400	3283200	3236300	3018700
P56528	ADP-ribosyl cyclase/cyclic ADP-ribose hydrolase 1	Cd38	5	13288000	7324600	12159000	7935800	8507400	12310000	9537900	11300000	12322000	10924000	12758000	14462000	9795200	11324000	11778000	11224000
P62331	ADP-ribosylation factor 6	Arf6	5	11475000	16878000	10758000	15183000	13962000	13227000	9959300	12114000	12398000	12632000	10437000	14430000	24815000	15804000	10563000	12256000
P46656	Adrenodoxin, mitochondrial	Fdx1	5	59581000	20626000	38971000	24196000	84497000	54582000	53774000	58703000	64343000	48547000	70764000	75286000	33173000	43198000	62828000	52258000
O89020	Afamin	Afm	5	8616500	3170000	7816900	4359700	9746000	7028600	5381600	8117000	6021700	7115500	6108900	5558100	3283800	5594800	5495800	6245200
Q8K4F5	Alpha/beta hydrolase domain-containing protein 11	Abhd11	5	10421000	13374000	12790000	12488000	9691100	7094200	17049000	11728000	17050000	13108000	12717000	9996200	13955000	13774000	10445000	9778100
P22599	Alpha-1-antitrypsin 1-2	Serpina1b	5	15452000	24145000	13808000	25362000	10224000	20494000	16498000	11478000	23592000	13423000	12737000	15273000	25535000	15161000	14395000	17185000
A0A1D5RMI8	Alstrom syndrome protein 1 homolog	Alms1	5	31804000	22769000	32406000	22763000	30701000	27419000	25950000	41981000	23124000	23193000	26848000	29268000	20528000	30360000	23762000	32169000
Q8VCT3	Aminopeptidase B	Rnpep	5	1482800	6128300	1688200	7874800	157966	1212200	3027300	1286600	2796300	116128	2369700	1350400	8303500	2371000	2344900	1433000
Q9DCZ4-2	Apolipoprotein O	Apoo	5	2229900	15312000	2653500	13238000	1609200	2920200	2571600	2639900	2884800	2741400	2450500	2850000	11144000	5478300	3246800	2767500
P50295	Arylamine N-acetyltransferase 2	Nat2	5	5394800	16434000	67047.2	13781000	16573000	10614000	2434800	5545600	10223000	5132000	10727000	9187700	17887000	4148400	8124800	9058500
P50428	Arylsulfatase A	Arsa	5	9112500	3955700	7203400	4046200	9383600	5767700	4857600	6490800	4489900	5283800	5226600	6619700	2952500	6444000	5394900	6238000
Q61024	Asparagine synthetase [glutamine-hydrolyzing]	Asns	5	103804	211200	67047.2	235301	157966	125371	124630	147941	629470	8117800	143516	597140	182460	135792	113190	152277
E9Q5Q0	Ataxin-2-like protein	Atxn2l	5	2931800	4219600	2477500	3793700	1952300	5263500	2813700	3660900	4848300	2955500	4254300	5640100	3244500	2195900	2551800	3861500
Q8K441	ATP-binding cassette sub-family A member 6	Abca6	5	103804	6409300	67047.2	5125900	157966	125371	124630	147941	159978	116128	143516	134110	4486500	135792	113190	152277
P59017	Bcl-2-like protein 13	Bcl2l13	5	8401900	11293000	5714000	8323600	8367200	5144400	5756500	5733700	5743200	4358700	7034000	4664800	7852200	3957200	5419200	4613000
G5E8N7	Bifunctional polynucleotide phosphatase/kinase;Polynucleotide 3-phosphatase;Polynucleotide 5-hydroxyl-kinase	Pnkp	5	2797500	1186300	2747000	968450	1614900	1893300	3259800	2760700	2445200	3246700	3318400	2783600	1810700	3480600	3369600	2643400
A0A0R4J131	Biotinidase	Btd	5	3673000	6231100	4794300	5054300	4894300	4226700	8150000	2933700	6077300	4919800	6026200	5914500	7056300	9238900	4955400	4283400
A0A0R4J2B2	BTB/POZ domain-containing protein KCTD12	Kctd12	5	3312200	3038600	4818100	3669200	5752100	5166800	3974500	5052000	4182300	6750200	5688300	3306500	3567100	4775600	3863700	3189700
Q06138	Calcium-binding protein 39	Cab39	5	1930000	3737000	2224000	5057200	1577500	2896200	1684800	1661100	2926700	2411100	1395900	1498200	8715800	2346600	1645900	2104200
O08529	Calpain-2 catalytic subunit	Capn2	5	438270	6260300	67047.2	5608800	157966	1201900	931610	147941	1896900	116128	1199400	134110	3254800	1559000	1340300	837960
Q9WVT6	Carbonic anhydrase 14	Ca14	5	17036000	10079000	11289000	7393500	21730000	15190000	22268000	17469000	13319000	15058000	14797000	11997000	8940000	15850000	16849000	16341000
Q9CXS4	Centromere protein V	Cenpv	5	20007000	18097000	19048000	14225000	10371000	28045000	12903000	25932000	17030000	18085000	18335000	22036000	15439000	21921000	17355000	24515000
Q9QYB1	Chloride intracellular channel protein 4	Clic4	5	3540400	8265400	3137900	6673300	2743800	4746100	4624700	3640700	8069600	5761700	7545100	5626400	7329900	5884500	3400500	3652800
P49586	Choline-phosphate cytidylyltransferase A	Pcyt1a	5	11764000	6831000	12107000	6952100	15772000	10909000	11156000	9972200	9383500	10145000	9492000	9482300	7899900	12970000	10442000	8852500
Q9DCC5	Chromobox protein homolog 3	Cbx3	5	19968000	10818000	14865000	11880000	20693000	20559000	17170000	19712000	17356000	23581000	17040000	17925000	15232000	16160000	17406000	23031000
B1AWE0	Clathrin light chain A	Clta	5	10108000	6027100	6482600	6873000	12190000	7636600	12920000	7263900	9943800	9010500	8602500	11197000	6254300	10843000	15327000	8182600
Q9EQS3	C-Myc-binding protein	Mycbp	5	38275000	19407000	43024000	19016000	39910000	28553000	40962000	38735000	32613000	36266000	35442000	39992000	21583000	37330000	32261000	36311000
D3Z315	Coatomer subunit epsilon	Cope	5	6659400	13919000	7613100	11184000	157966	8512200	9942200	4773300	9615800	8319100	7324700	7973200	11202000	8806000	10567000	7155600
Q8VCG4	Complement component C8 gamma chain	C8g	5	11406000	7876600	10038000	9251000	13315000	8301900	11303000	10596000	14311000	11656000	8453000	12341000	7169700	10658000	8960400	10485000
Q9CZ04	COP9 signalosome complex subunit 7a	Cops7a	5	2731000	5129200	4935600	4398300	2352900	5335600	4529500	2966100	4357300	5137600	5677900	3882600	6180000	3911700	4790700	4750800
Q8VBV7	COP9 signalosome complex subunit 8	Cops8	5	6712000	5713500	5573800	5064700	4943900	5497700	6739800	2369600	6731100	4885900	6050200	4260000	5118000	6334100	7846900	5173600
Q9QZQ8-2	Core histone macro-H2A.1	H2afy	5	103804	13850000	4119200	9628800	1207000	2646500	2179600	2258200	2589300	3794600	1164400	3627500	29973000	4282600	4082600	5266600
Q62426	Cystatin-B	Cstb	5	91374000	48207000	79358000	48529000	102900000	75474000	62104000	93760000	88906000	81986000	81868000	94274000	45720000	64269000	97157000	85520000
G5E850	Cytochrome b5	Cyb5a	5	1067000000	567970000	871160000	657210000	703190000	970070000	724360000	838230000	756920000	651070000	894550000	749840000	595860000	827060000	922140000	929010000
Q9CQ69	Cytochrome b-c1 complex subunit 8	Uqcrq	5	12063000	45497000	8663900	36499000	7644300	13820000	14419000	12449000	12769000	7962500	7901500	7372300	33560000	11631000	16025000	12051000
P56391	Cytochrome c oxidase subunit 6B1	Cox6b1	5	119760000	69545000	147260000	69254000	116220000	99812000	98695000	133370000	81609000	58490000	127760000	108750000	63330000	81821000	117400000	214430000
Q91VU6	DDB1- and CUL4-associated factor 11	Dcaf11	5	4159100	4870500	5520500	3875800	4163600	3676200	5766700	3808000	4262800	4838600	3538100	3431600	5705100	6568100	4888200	4545000
Z4YKT6	Dehydrogenase/reductase SDR family member 7B	Dhrs7b	5	13814000	9424800	15800000	10075000	9537600	7673000	8231800	10060000	6192000	6695900	7996800	8295500	8485500	8253800	9565400	9999900
P00375	Dihydrofolate reductase	Dhfr	5	1241200	20200000	1731100	11085000	1537600	2381600	2353300	1956200	3351100	2351500	3317200	1504300	10692000	2613400	2435900	2670800
F6SLP4	Endoplasmic reticulum-Golgi intermediate compartment protein 1	Ergic1	5	4230800	5758100	6265800	4987800	4063400	3994300	9366300	5128500	6213100	4038900	4408000	4370500	6211300	5613200	3930300	4930600
Q9JMG1	Endothelial differentiation-related factor 1	Edf1	5	7861100	4494900	6374200	5071300	4109200	9425000	7711100	10021000	9500000	7709500	9343500	12395000	5349700	6841800	8331400	11047000
A0A1D5RLS1	Epidermal growth factor receptor substrate 15-like 1	Eps15l1	5	1021100	1833200	1306100	2387600	157966	851480	124630	147941	1433300	1497800	1668400	134110	1679700	843850	1234300	152277
Q9CRD2	ER membrane protein complex subunit 2	Emc2	5	7541600	4778800	8183400	6273700	5860100	8915300	7104000	5491500	5641300	3456600	6307500	5426300	3731000	6881900	9244700	10604000
A0A0N4SVP8	Eukaryotic initiation factor 4A-III;Eukaryotic initiation factor 4A-III, N-terminally processed	Eif4a3;Gm8994	5	7188000	9893900	7011900	8701600	8077100	6991900	7129600	5694900	5008300	8659000	6756700	6080700	8578800	6528100	5285600	4711200
Q8BWY3	Eukaryotic peptide chain release factor subunit 1	Etf1	5	2823800	8838600	67047.2	6980700	157966	3286400	885850	2631100	1688100	803340	143516	646020	8431100	2070200	3412300	2500200
A0A494BB95	Eukaryotic translation initiation factor 1A	Eif1a;Gm8300;Gm2016;Gm2035;Gm5662;Gm2056;Gm6803	5	8198800	6649200	9531300	6662600	9303700	10408000	8774000	11283000	10842000	9651700	10899000	12187000	7016600	8147900	6997600	9290000
Q8BJW6	Eukaryotic translation initiation factor 2A;Eukaryotic translation initiation factor 2A, N-terminally processed	Eif2a	5	1879500	3802300	1396300	2622000	1052500	2671000	1657900	1784700	2969200	1503400	2770700	2948400	1752500	962440	1415000	1760000
Q9DBZ5	Eukaryotic translation initiation factor 3 subunit K	Eif3k	5	2752500	11653000	2314300	10017000	157966	5472000	3159800	2879100	4094000	9680700	2382700	4863400	12042000	5536800	4508800	4224800
P63073	Eukaryotic translation initiation factor 4E	Eif4e	5	6749400	8272300	7215500	8704500	6733200	7441700	9988600	8072300	11417000	9216600	8039100	9979500	10089000	8426200	7869800	11268000
Q3U7R1	Extended synaptotagmin-1	Esyt1	5	1200300	2655200	1591700	2274700	1499200	1405600	2092500	1162000	2081400	1511500	1836900	1477100	1439300	1924900	1982300	1286800
O09164	Extracellular superoxide dismutase [Cu-Zn]	Sod3	5	9934000	5612300	9303700	5286400	9969300	9505700	6582700	10654000	8709500	15501000	9580800	11180000	5527100	8593600	7187000	8559900
P26040	Ezrin	Ezr	5	5094700	2601100	4722100	2728400	4821500	6049300	4542600	5966300	5898600	5599400	5427000	5353000	2989300	4236100	3906600	5008100
P11404	Fatty acid-binding protein, heart	Fabp3	5	175130	211200	67047.2	235301	157966	245550	124630	216050	48592000	116128	209850	134110	138180	200500	113190	152277
A2AEX8	Four and a half LIM domains protein 1	Fhl1	5	1927800	1119400	3095800	235301	1662400	3900200	2684500	3904500	12279000	4806300	3051100	2766200	182460	3053200	1962600	3786200
Q9Z2A9	Gamma-glutamyltransferase 5;Gamma-glutamyltransferase 5 heavy chain;Gamma-glutamyltransferase 5 light chain	Ggt5	5	3085200	1869700	2764600	2110000	3229900	3025400	3468400	2690100	3359800	4871500	4061700	3695500	1409500	3621800	2307200	2878600
Q60648	Ganglioside GM2 activator	Gm2a	5	36233000	17342000	28187000	17899000	38782000	35920000	22381000	37810000	22484000	42110000	28969000	28693000	12771000	28235000	28930000	37647000
P35576	Glucose-6-phosphatase	G6pc	5	2362100	23383000	2403300	21433000	157966	3136700	4653900	583550	1383300	1629500	1866000	2306500	13481000	4297500	3944600	4195200
Q9QUH0	Glutaredoxin-1	Glrx	5	41185000	25633000	50677000	29282000	64196000	51326000	43196000	50346000	43816000	38079000	44239000	51344000	30906000	47629000	56587000	54576000
Q99L27	GMP reductase 2	Gmpr2	5	4199300	2554600	3463500	3045100	3493700	3436900	3194200	4712100	4769200	3893100	4466000	3544300	2617500	3662200	3256900	5052100
Q61543	Golgi apparatus protein 1	Glg1	5	3969300	2326500	3095500	2425000	2868400	3096200	3410100	3218200	4177800	4723900	3663800	4997500	1610100	3168900	2422800	4217400
P11862	Growth arrest-specific protein 2	Gas2	5	2806500	4100100	1686200	2488900	635380	3505400	1375400	2002700	2183400	3690400	2071800	2619200	1934100	2009400	2416100	2678800
P99025	GTP cyclohydrolase 1 feedback regulatory protein	Gchfr	5	170360000	91272000	194580000	93605000	163440000	153070000	120540000	186710000	119150000	178550000	167010000	159270000	87433000	161820000	136060000	159670000
Q99JY3	GTPase IMAP family member 4	Gimap4	5	103804	6333900	1455800	5573100	157966	1289500	2373700	147941	1900300	1692500	143516	134110	8684400	2018700	3025800	152277
P08752	Guanine nucleotide-binding protein G(i) subunit alpha-2	Gnai2	5	103804	4245800	67047.2	5303500	157966	125371	124630	147941	976220	746400	143516	134110	2438200	135792	113190	152277
Q9JL35	High mobility group nucleosome-binding domain-containing protein 5	Hmgn5	5	39060000	18327000	27419000	21009000	35381000	39437000	31462000	37602000	32496000	33990000	35917000	37010000	16607000	28597000	34579000	40905000
P30681	High mobility group protein B2	Hmgb2	5	9159300	5229800	8547300	6002500	7152400	11162000	7896100	9020700	9860800	11892000	9776600	9312100	5751500	6819800	8571900	7684100
Q9D0S9	Histidine triad nucleotide-binding protein 2, mitochondrial	Hint2	5	228390000	152510000	299880000	152750000	380040000	274440000	271960000	267970000	221590000	297120000	266040000	282470000	161360000	325300000	219390000	259520000
P02301	Histone H3.3C;Histone H3.3;Histone H3	H3f3c;H3f3a	5	41222000	113700000	61249000	83713000	39812000	41021000	27536000	37608000	62672000	57364000	64432000	62453000	246510000	49539000	40995000	77796000
Q9D892	Inosine triphosphate pyrophosphatase	Itpa	5	2040400	8419600	2027800	7611200	1823500	2719300	3847900	2811200	5643800	4417700	4219500	3739700	7396700	3803800	3160500	3262500
Q9DCC7	Isochorismatase domain-containing protein 2B, mitochondrial	Isoc2b	5	13123000	8704900	15482000	7528700	20111000	12219000	15895000	14239000	13479000	14578000	14862000	12990000	9031100	12625000	15030000	12450000
Q9CX00	IST1 homolog	Ist1	5	3225600	3448800	2701800	3057200	3530700	4128600	4029500	3221900	4170400	4131500	4135100	2914100	4352900	4168300	4263300	3826700
Q02257	Junction plakoglobin	Jup	5	2130700	6493600	3169400	3804200	2404800	2786900	3232600	1601100	2993500	3691600	2341000	2717000	4190100	3947900	2193900	2177500
Q9ERG0-2	LIM domain and actin-binding protein 1	Lima1	5	5352200	6717600	4116300	5631900	5173300	5430200	4664400	4417300	5991600	5060600	4703600	4666600	5680900	4127400	4354000	4081700
Q9D358	Low molecular weight phosphotyrosine protein phosphatase	Acp1	5	12090000	9742600	14542000	8209000	14625000	11183000	10624000	14077000	11066000	11019000	13959000	14565000	8014200	8422000	8537600	10643000
Q8K215	LYR motif-containing protein 4	Lyrm4	5	9940500	6449800	6811900	6808400	8876400	9054400	8254300	9156300	9119500	9671100	9196100	8244900	7350600	8113700	8237400	9790800
E9QLB2	Lysophospholipase-like protein 1	Lyplal1	5	4394000	6043900	4481400	5805100	6954200	4897900	4349200	4939700	4517300	5318700	6356000	4072400	5185500	4119500	4706300	3269600
Q9DAR7	m7GpppX diphosphatase	Dcps	5	14597000	9592000	14038000	8990400	15751000	14492000	16868000	12227000	11844000	20565000	14766000	14855000	11194000	17576000	12957000	14393000
P34884	Macrophage migration inhibitory factor	Mif	5	391530000	267880000	482090000	239210000	606870000	414220000	501060000	387660000	435520000	597240000	451250000	439740000	235860000	603330000	447120000	503520000
Q9JLB0	MAGUK p55 subfamily member 6	Mpp6	5	3659100	3262900	3979400	3988500	3258600	4462400	4177200	3848800	4471100	3946100	4459400	4580600	3765800	4001100	3446200	3754400
P39039	Mannose-binding protein A	Mbl1	5	15090000	8614300	12567000	10243000	7602100	12967000	12319000	16042000	12003000	11033000	12142000	16190000	8593800	11440000	9386800	12204000
Q80UU9	Membrane-associated progesterone receptor component 2	Pgrmc2	5	31602000	19850000	23900000	21032000	18987000	20202000	14057000	16976000	13038000	12558000	13194000	12217000	16597000	20151000	22838000	20622000
Q9CRB9	MICOS complex subunit Mic19	Chchd3	5	16099000	20068000	15061000	18336000	9914600	21132000	15458000	14877000	17834000	11494000	15403000	14010000	14592000	13821000	23561000	30130000
Q59J78	Mimitin, mitochondrial	Ndufaf2	5	5856000	4040400	4297700	4203900	5618700	4603400	4439500	4219900	4719300	4169100	4503600	5259800	4402600	3924900	5475400	6132500
Q9WVA2	Mitochondrial import inner membrane translocase subunit Tim8 A	Timm8a1	5	58328000	32631000	57183000	31086000	80012000	60434000	70565000	71807000	53008000	67785000	81122000	70435000	24871000	63514000	56571000	50117000
P63030	Mitochondrial pyruvate carrier 1	Mpc1	5	10515000	22973000	10091000	25548000	3085200	11673000	9584200	11760000	9981500	9932200	13538000	5689700	28032000	7352200	8333100	8051900
P28666	Murinoglobulin-2	Mug2	5	103804	6589500	1228000	4009100	157966	921050	1971900	147941	2526300	991140	579280	622900	5844400	879500	352180	152277
G3UWC2	N-acetylated-alpha-linked acidic dipeptidase 2	Naalad2	5	2625500	2227800	2760300	1820500	3102700	2294400	2528700	2369000	2161500	3489300	2952300	2458500	2051300	2786400	2104700	2696800
Q8R4H7-2	N-acetylglutamate synthase, mitochondrial;N-acetylglutamate synthase long form;N-acetylglutamate synthase short form;N-acetylglutamate synthase conserved domain form	Nags	5	103804	7339700	67047.2	4501600	157966	788090	124630	147941	1604100	1838300	784910	134110	3991200	829500	113190	152277
Q9ERS2	NADH dehydrogenase [ubiquinone] 1 alpha subcomplex subunit 13	Ndufa13	5	8326800	24570000	10343000	21673000	6125700	11867000	14450000	8941600	9174600	4182600	5008800	5168300	18583000	10645000	15182000	15305000
Q9CPP6	NADH dehydrogenase [ubiquinone] 1 alpha subcomplex subunit 5	Ndufa5	5	19362000	18145000	14655000	16500000	11033000	20328000	17947000	17267000	17373000	9695100	15041000	14740000	13099000	12234000	25319000	27708000
Q60817	Nascent polypeptide-associated complex subunit alpha;Nascent polypeptide-associated complex subunit alpha, muscle-specific form	Naca	5	122180000	58413000	117670000	61650000	120610000	112980000	97873000	110750000	104100000	107580000	98504000	134270000	71633000	82668000	95776000	123050000
Q8BLF1	Neutral cholesterol ester hydrolase 1	Nceh1	5	2446800	3816000	4064900	3624500	2903100	2305800	4479100	1859200	3331000	2976800	3109500	3022300	4328800	4122500	3167800	2991700
Q8CCH2	NHL repeat-containing protein 3	Nhlrc3	5	8926500	3970700	7184200	4470100	15610000	9010400	7003500	10713000	9007300	6766000	8633100	9110900	4738600	6781800	8046800	8902500
Q922B1	O-acetyl-ADP-ribose deacetylase MACROD1	Macrod1	5	12257000	18887000	16584000	19012000	9466300	14494000	17201000	11907000	14323000	11330000	11804000	7742100	18193000	16721000	11217000	13228000
Q9D8W7	OCIA domain-containing protein 2	Ociad2	5	39429000	26259000	34543000	26233000	23718000	29713000	23815000	24452000	20955000	24827000	23801000	25288000	20793000	24341000	30983000	27079000
Q9ET54-3	Palladin	Palld	5	2946600	2514200	2176700	2104000	2144600	2681900	3703700	2718400	2438200	2333900	2042000	2148500	2376400	2289000	3287200	2901400
P26883	Peptidyl-prolyl cis-trans isomerase FKBP1A	Fkbp1a	5	36368000	20737000	37722000	22489000	31748000	35046000	29719000	38610000	41708000	37739000	38577000	49283000	22130000	34211000	36294000	40890000
Q8R2Y8	Peptidyl-tRNA hydrolase 2, mitochondrial	Ptrh2	5	29026000	18224000	24452000	19346000	23030000	18634000	20673000	22329000	18094000	18024000	21071000	20306000	16153000	20577000	18539000	21052000
Q9Z211	Peroxisomal membrane protein 11A	Pex11a	5	103804	26953000	1024100	18187000	157966	207050	124630	147941	159978	116128	422640	437160	6310500	135792	374740	219820
Q5D073	Peroxisomal membrane protein 2	Pxmp2	5	989640	19445000	1252400	16499000	157966	1595000	2460000	1196700	2125400	1757800	1041400	980000	15117000	2119000	2962300	841570
Q5SV41	Phosphatidylcholine transfer protein	Pctp	5	10171000	10607000	15142000	10022000	8827300	6439900	4988400	7860100	3250700	4637900	8160100	3850400	8722100	9318700	9478500	8109100
P97290	Plasma protease C1 inhibitor	Serping1	5	4370500	7115700	4401300	9328900	5160500	5731200	5745200	5176900	8028100	5977700	4880600	4621500	6154400	5111800	5784100	4363600
Q91YZ8	Polyadenylate-binding protein	Pabpc4	5	2451100	3229800	2228300	3231600	4418300	2202000	3172100	2784300	3336800	3885700	3355100	2769700	3560700	2814900	113190	3191800
Q9WU28	Prefoldin subunit 5	Pfdn5	5	11719000	4825500	10040000	5402700	11866000	9792000	10045000	10445000	7406100	11147000	10042000	10037000	5759600	8786200	9376900	9114000
P54823	Probable ATP-dependent RNA helicase DDX6	Ddx6	5	5449600	5491000	3734700	5599400	4773100	6561300	5543500	4463100	6088600	6192400	6480500	6471900	5045800	4601600	3993100	4758300
Q61823	Programmed cell death protein 4	Pdcd4	5	6744600	8994200	8445300	9642500	7177200	10946000	9104600	6577500	12596000	14146000	10382000	11319000	16091000	9817700	113190	5664200
P56812	Programmed cell death protein 5	Pdcd5	5	22992000	12822000	22845000	12223000	23577000	19269000	19823000	24689000	19727000	21249000	17691000	19260000	11663000	24025000	22050000	22821000
P12815-2	Programmed cell death protein 6	Pdcd6	5	13337000	13741000	13794000	14356000	18827000	11017000	13911000	15185000	16525000	11532000	10966000	12466000	13968000	12930000	14876000	14289000
E9PZ00	Prosaposin	Psap	5	35933000	26826000	40759000	28316000	74220000	36681000	32797000	42832000	40011000	57781000	52829000	51729000	18112000	38737000	28625000	43570000
Q9R0Q7	Prostaglandin E synthase 3	Ptges3	5	28255000	39886000	33881000	41234000	30782000	37117000	28439000	27609000	29719000	41476000	31104000	30283000	39756000	33548000	37498000	38997000
A0A571BEG4	Protein 4.1	Epb4.1;Epb41	5	2160800	3039000	2622600	3387200	1942900	3515700	2195500	2096800	2411800	3146800	1909400	2539700	2460800	1665100	1836200	2104100
E9Q8Y1	Protein DEK	Dek	5	5518500	2078200	4823600	3360600	3921200	4515700	3294100	3956500	4591000	6012000	3818600	5093900	3311700	4897800	5432000	4824800
Q99JB8	Protein kinase C and casein kinase II substrate protein 3	Pacsin3	5	6976500	5962300	10227000	6972600	8812100	9325500	11765000	7780700	10748000	12184000	8247500	9395800	9920800	10914000	9356000	7678300
A0A0J9YVG0	Protein phosphatase 1G	Ppm1g	5	6627500	7383800	8390800	5405100	8166600	6363100	5868900	5988700	7673500	6759200	7787500	8466300	4937500	5720100	6825500	7340700
P61620	Protein transport protein Sec61 subunit alpha isoform 1	Sec61a1	5	103804	11720000	67047.2	8969300	157966	175530	469220	147941	611990	35036	143516	43281	8322700	106660	471730	152277
D3Z3E8	Putative helicase MOV-10	Mov10	5	4744600	3223500	4691700	3218800	5561600	4276500	4731100	5075300	5101200	5636500	5954800	5788800	3910700	4291200	4343700	4554700
Q9DCC4	Pyrroline-5-carboxylate reductase 3	Pycrl	5	9297100	9234400	7486800	9852700	9443200	9579700	9108900	10033000	7198400	7789900	7438600	7731400	8949400	7085000	9265000	7837900
Q3UNZ8	Quinone oxidoreductase-like protein 2	BC026585	5	103804	12319000	67047.2	10768000	157966	125371	124630	147941	418620	116128	143516	134110	3876000	135792	113190	152277
P34022	Ran-specific GTPase-activating protein	Ranbp1	5	19327000	10774000	19004000	12305000	21414000	19491000	18460000	20588000	18658000	21710000	17772000	21103000	13418000	18249000	19644000	20097000
Q9CZE3	Ras-related protein Rab-32	Rab32	5	2673600	1642600	1900800	1942800	2225900	2454900	2072400	2134600	1980700	3353200	2524400	2617500	1689100	2418000	2111200	3020500
Q9CQD1	Ras-related protein Rab-5A	Rab5a	5	11729000	6427200	12260000	6922600	11131000	12799000	11025000	12454000	9952500	10775000	12223000	12928000	7127800	11733000	11183000	9753900
D3YV69	Ras-related protein Rab-6A	Rab6a	5	12671000	8536300	11048000	7906600	12771000	13608000	9799000	12505000	11839000	11851000	11298000	13700000	9134700	10171000	12878000	12988000
Q9R0M6	Ras-related protein Rab-9A	Rab9a;Rab9	5	6342500	6821600	5629500	6880600	8580500	9056800	6131300	7167600	8550400	8676000	7220700	8120600	8419900	8985400	8815500	7771400
Q9JIW9	Ras-related protein Ral-B	Ralb	5	14394000	8692600	19277000	8261300	16668000	14481000	17525000	13317000	12770000	15389000	12574000	14979000	8664800	15977000	15426000	14937000
Q9R1R8	Retinol dehydrogenase 11	Rdh11	5	1060800	4824600	806130	5151200	157966	125371	1216100	147941	1232800	1416500	1729000	134110	8099200	1503200	1726900	1956100
A0A2I3BRL8	RNA binding motif protein, X-linked-like-1;RNA-binding motif protein, X chromosome;RNA-binding motif protein, X chromosome, N-terminally processed	Rbmxl1;Rbmx	5	13395000	9726600	15103000	9635200	12649000	14138000	15124000	11985000	13277000	14912000	13670000	14848000	10692000	18151000	11690000	15923000
A0A1W2P7G2	SAP domain-containing ribonucleoprotein	Sarnp	5	9109300	5129000	8021800	6293100	7266100	10395000	7989500	7709100	9504700	10583000	9647700	11131000	7749600	9470900	10445000	11035000
Q8BRF7-3	Sec1 family domain-containing protein 1	Scfd1	5	103804	5162500	67047.2	4271000	157966	125371	124630	147941	159978	116128	143516	134110	5196600	135792	113190	152277
Q9QZX7-2	Serine racemase	Srr	5	10197000	6795500	10271000	6742200	11067000	7012000	9536300	9069100	7172400	6025900	9745400	7360600	6835500	9821600	10209000	8888500
Q8BYC6	Serine/threonine-protein kinase TAO3	Taok3	5	2782000	4017600	2796400	4834100	2337900	3672200	3010100	3159500	5491700	3328400	3266000	3778800	3619200	4264100	3796700	3392300
Q925N2	Sideroflexin-2	Sfxn2	5	103804	4696100	67047.2	2639000	157966	715580	574840	147941	644390	116128	143516	865530	10151000	135792	798580	152277
P16254	Signal recognition particle 14 kDa protein;Signal recognition particle 14 kDa protein, N-terminally processed	Srp14	5	24826000	12632000	22283000	14712000	27339000	23765000	27368000	29388000	24978000	25866000	24371000	29238000	17864000	24421000	20834000	23684000
Q9DBG7	Signal recognition particle receptor subunit alpha	Srpr	5	103804	6004400	428350	4596300	157966	125371	548320	147941	877060	116128	143516	134110	4464100	135792	113190	152277
Q8BMA6	Signal recognition particle subunit SRP68	Srp68	5	27074	4914200	34736	4152600	157966	38620	50272	147941	60592	116128	38152	134110	5175900	41752	113190	152277
A0A1W2P6P1	Small glutamine-rich tetratricopeptide repeat-containing protein alpha	Sgta	5	11701000	7021600	8917700	7147000	8989900	7752000	8944600	11807000	7318400	9044600	7444400	8664300	6908300	8858900	8337000	10261000
P62320	Small nuclear ribonucleoprotein Sm D3	Snrpd3	5	34090000	20803000	30776000	19636000	31860000	31896000	26506000	38695000	36770000	43379000	36577000	46799000	21269000	36491000	28998000	35309000
P14094	Sodium/potassium-transporting ATPase subunit beta-1	Atp1b1	5	9939600	30200000	10380000	26465000	11910000	15216000	15893000	10458000	14626000	14057000	10247000	11412000	20253000	12964000	17573000	13951000
P97370	Sodium/potassium-transporting ATPase subunit beta-3	Atp1b3	5	8353500	15411000	10369000	13046000	11521000	8639700	14933000	6163300	11325000	9216100	8174000	9468300	14378000	10683000	9687700	8311700
Q9DCP2	Sodium-coupled neutral amino acid transporter 3	Slc38a3	5	5387900	24196000	5295900	22332000	3466100	8211600	8013100	6123000	12279000	13234000	7697400	11601000	17800000	4318300	9429700	4296300
P14246	Solute carrier family 2, facilitated glucose transporter member 2	Slc2a2	5	103804	42066000	67047.2	41516000	157966	1789300	5434000	484400	4288200	116128	143516	984470	38320000	1964800	1997700	152277
O08966	Solute carrier family 22 member 1	Slc22a1	5	103804	9833000	67047.2	9894900	157966	125371	124630	147941	159978	116128	143516	134110	7792200	135792	113190	152277
Q3V1K7	Solute carrier organic anion transporter family member 2B1	Slco2b1	5	1143500	3704800	928410	4146900	808910	1245300	1158300	1014400	1609700	929420	1317800	932990	3076500	1068300	955100	1431300
A0A286YCQ0	Sorbin and SH3 domain-containing protein 1	Sorbs1	5	3930000	6057600	7332200	4573100	5426700	5123400	6429600	4075200	4940800	5395900	4588300	4947800	5390400	5688900	5389600	4281700
Q64674	Spermidine synthase	Srm	5	3410800	5738900	3496500	5331800	2721200	2547200	6765600	2426900	7727100	4910600	4751400	2986900	8920400	7072200	5373900	3227000
Q80XR5	Splicing factor U2AF 65 kDa subunit	U2af2	5	7568400	5976000	7934800	5696700	8373000	6305800	7247500	5490000	6494100	9295700	9465800	5431900	7904200	8837600	7484600	5925600
Q9EPQ7	StAR-related lipid transfer protein 5	Stard5	5	26576000	16140000	33982000	18033000	38001000	27105000	30118000	34363000	21981000	27611000	29993000	29810000	12659000	30767000	26444000	28607000
O88908	Sterol O-acyltransferase 2	Soat2	5	103804	5031300	67047.2	4520000	157966	125371	124630	147941	159978	508210	143516	134110	592580	135792	113190	152277
Q9R1J0	Sterol-4-alpha-carboxylate 3-dehydrogenase, decarboxylating	Nsdhl	5	1262500	5894400	704940	5477000	157966	1189100	3708900	976090	3247900	1639900	2226300	2088300	11601000	1659500	3370200	1817600
Q8BH40	Syntaxin-7	Stx7	5	5307500	2954700	4776500	3639300	5164400	5496700	4170800	4682600	7090300	5174200	4263700	5628500	3414200	3845100	4871000	5290200
Q921F2	TAR DNA-binding protein 43	Tardbp	5	103804	13938000	67047.2	10443000	157966	1226200	1531000	147941	1672400	1848900	1034000	134110	16592000	1188200	1243100	1182600
Q05117	Tartrate-resistant acid phosphatase type 5	Acp5	5	17398000	10503000	12117000	11634000	21174000	16095000	19112000	17118000	19613000	22327000	16335000	21300000	13628000	24511000	19997000	16024000
Q9CQU0	Thioredoxin domain-containing protein 12	Txndc12	5	25924000	13085000	29351000	13653000	26844000	20031000	25753000	29722000	18953000	24341000	19351000	22900000	13183000	23232000	21104000	20677000
Q9CQM5	Thioredoxin domain-containing protein 17	Txndc17	5	27638000	25162000	26162000	22961000	25480000	26002000	24831000	21507000	29184000	27975000	23883000	29151000	23381000	30268000	27434000	27748000
G3UZY2	Thioredoxin, mitochondrial	Txn2	5	107580000	51645000	120210000	59848000	158550000	120610000	104860000	149950000	101690000	132770000	121000000	134710000	46519000	116860000	87562000	100890000
O08583	THO complex subunit 4;Aly/REF export factor 2	Alyref;Alyref2	5	15553000	8808200	13372000	9998600	17209000	15793000	11909000	14425000	14608000	17297000	14399000	17100000	10111000	11980000	16228000	15100000
P20065-2	Thymosin beta-4;Hematopoietic system regulatory peptide	Tmsb4x	5	75174000	58845000	86000000	50640000	79211000	119740000	70036000	111950000	117880000	136810000	119560000	159500000	52129000	60843000	59461000	89793000
D3Z0F3	Transcription factor A, mitochondrial	Tfam	5	22422000	13285000	19992000	12774000	18659000	21536000	14071000	17676000	16050000	17398000	18131000	18431000	11445000	16769000	17894000	20128000
Q64152-2	Transcription factor BTF3	Btf3	5	28064000	13972000	21956000	16893000	29210000	28108000	28536000	32228000	28522000	26868000	28827000	32337000	19375000	23994000	27139000	29194000
Q9CXA2	Trans-L-3-hydroxyproline dehydratase	L3hypdh	5	5259300	8356100	8427200	6931500	6534600	6330900	7074700	4480900	4162400	4317600	4035100	3230300	6881300	7842200	6126300	5567200
Q9R0Q3	Transmembrane emp24 domain-containing protein 2	Tmed2	5	23015000	15320000	21002000	17746000	15102000	23030000	22801000	23200000	23013000	19978000	22329000	19740000	13019000	19406000	18275000	24401000
Q8R1V4	Transmembrane emp24 domain-containing protein 4	Tmed4	5	19247000	11842000	18813000	12982000	13465000	17505000	14252000	16607000	12536000	13520000	13201000	15018000	9679100	13834000	15666000	17415000
Q91ZE0	Trimethyllysine dioxygenase, mitochondrial	Tmlhe	5	8559700	5078200	8924000	5191000	9208600	7315600	5985500	7457900	4367200	5976400	3570900	4501100	3980200	4551300	6674700	5168600
O89023	Tripeptidyl-peptidase 1	Tpp1	5	127060000	80346000	88612000	90971000	130480000	108820000	100280000	131800000	137300000	129810000	117550000	133170000	91752000	104730000	107680000	125390000
P32921-2	Tryptophan--tRNA ligase, cytoplasmic;T1-TrpRS;T2-TrpRS	Wars	5	2184300	6673200	4795700	4518900	157966	3311400	3103200	2877300	2483100	2627700	2891600	2594400	4766600	3405300	2451400	3320000
Q7TMM9	Tubulin beta-2A chain;Tubulin beta-2B chain	Tubb2a;Tubb2b	5	2742000	30418000	4810100	26215000	683240	5204200	9650800	147941	6526300	5379300	3371900	4507100	28369000	6272300	6613500	3724600
P99024	Tubulin beta-5 chain	Tubb5	5	11773000	70863000	13883000	60195000	13172000	15176000	25477000	9506600	23639000	24891000	12198000	17235000	71700000	23300000	17871000	14003000
Q6ZWM4	U6 snRNA-associated Sm-like protein LSm8	Lsm8	5	21248000	11077000	22529000	12773000	25100000	23346000	20982000	29032000	23998000	30875000	24805000	27259000	11063000	20038000	16379000	22833000
P70362	Ubiquitin fusion degradation protein 1 homolog	Ufd1l	5	8934300	8086400	10901000	8216100	10186000	7224200	10163000	7648500	6139000	8081000	6974700	7014200	8866300	10112000	8410000	6782600
P62983	Ubiquitin-40S ribosomal protein S27a;Ubiquitin;40S ribosomal protein S27a;Ubiquitin-60S ribosomal protein L40;Ubiquitin;60S ribosomal protein L40;Polyubiquitin-B;Ubiquitin;Polyubiquitin-C;Ubiquitin;Ubiquitin-related 1;Ubiquitin-related 2	Rps27a;Gm8797;Uba52;Kxd1;Ubc;Ubb	5	367220000	289390000	334570000	286900000	404230000	392190000	338390000	390900000	419240000	391900000	384150000	421860000	319640000	320870000	334160000	449080000
P61087	Ubiquitin-conjugating enzyme E2 K	Ube2k	5	5190500	8030300	5615400	8980800	157966	5593600	8189400	4221100	9562600	5252200	6151800	6499400	11373000	7287400	8505300	7037600
Q9CR09	Ubiquitin-fold modifier-conjugating enzyme 1	Ufc1	5	22503000	11512000	24861000	15150000	23992000	17708000	19264000	26439000	18002000	22920000	21711000	19947000	14141000	16643000	20989000	20029000
E9QNH6	Unconventional myosin-Ib	Myo1b	5	103804	2810500	67047.2	2052600	157966	125371	124630	147941	159978	116128	143516	134110	3290400	135792	113190	152277
Q9WTI7-4	Unconventional myosin-Ic	Myo1c	5	722430	2634500	67047.2	1965300	157966	1686300	124630	147941	546380	590070	143516	541880	7671900	135792	113190	1263000
P13439	Uridine 5-monophosphate synthase;Orotate phosphoribosyltransferase;Orotidine 5-phosphate decarboxylase	Umps	5	1445300	14017000	1659000	4083800	1781400	3059100	2732400	147941	2527200	1236600	143516	1228500	11853000	2031500	1982400	2616700
O08547	Vesicle-trafficking protein SEC22b	Sec22b	5	3691800	11713000	3621200	10160000	2123700	4641300	3388000	3267000	5308200	3633100	2520500	3519300	10848000	3582000	3714400	4406600
Q9JLI0	Aldo-keto reductase a	Akr1c12	5	24562000	28450000	21144000	28622000	34021000	23306000	25800000	29045000	24960000	23037000	29289000	31920000	26554000	25978000	26704000	25754000
E9Q0T8	Dynein, axonemal, heavy chain 7A	Dnah7a;Dnah7c;Dnah7b	5	39673000	20369000	21227000	27579000	157966	24020000	25351000	147941	22402000	31790000	28057000	21870000	182460	30552000	29342000	152277
Q99L20	Glutathione S-transferase theta-3	Gstt3	5	131580000	726330000	162520000	761110000	64599000	236380000	149870000	88522000	108170000	84882000	101960000	16964000	457490000	206670000	230790000	137610000
A0A286YDA2	Nucleolar and coiled-body phosphoprotein 1	Nolc1	5	10157000	5620600	8333200	5007400	10572000	11030000	10106000	9088700	12796000	10368000	13185000	11970000	5522900	9605200	10909000	13011000
F7BJK1	Protocadherin 1	Pcdh1	5	3104400	2338200	3281200	3735800	2238700	2743500	3731800	2092900	4138200	5747000	2827000	3507900	3567300	3374100	4112100	2133900
E9Q7G1	Transmembrane p24 trafficking protein 7	Tmed7	5	17514000	11816000	19377000	11302000	15930000	14736000	15251000	19722000	18059000	17023000	16027000	21544000	9520900	15727000	13945000	18895000
K9J7B2	UDP glucuronosyltransferase 1 family, polypeptide A6B	Ugt1a6b	5	3212600	43681000	5088400	34248000	2601800	5307900	8955500	4082700	7719600	4400400	5428700	3898800	36822000	9194200	6080100	3558900
A0A1D5RLM8	Predicted gene 11639	Gm11639	5	11632000	5641400	11506000	7152200	15656000	9531700	10401000	10709000	9194000	12519000	14338000	12106000	7703200	13073000	7944300	9831600
Q8VCC1	15-hydroxyprostaglandin dehydrogenase [NAD(+)]	Hpgd	4	103804	12089000	2838200	7453900	1564400	3679200	3461700	2177100	159978	116128	2175900	134110	9473700	4419000	3185400	3305600
Q8K3K7	1-acyl-sn-glycerol-3-phosphate acyltransferase beta	Agpat2	4	6537400	16520000	6172100	12772000	8895900	4709400	10980000	6489700	5952200	6437000	9077700	6881400	6797800	6795000	7727100	12981000
Q3TG45	26S proteasome non-ATPase regulatory subunit 8	Psmd8	4	9908100	16049000	12325000	17736000	157966	11820000	12536000	5397600	10583000	12837000	11113000	8588900	17228000	12589000	11022000	10457000
Q9CPX7	28S ribosomal protein S16, mitochondrial	Mrps16	4	4862400	2799500	3202000	4007800	3982600	4230100	4114000	4689300	3945700	4845100	4521700	4370700	4016500	4434100	4673300	4445100
Q8BJZ4	28S ribosomal protein S35, mitochondrial	Mrps35	4	1225000	5000800	4862200	3179200	157966	125371	4327300	147941	4076100	3143700	1807700	134110	5109200	2850900	3379500	2859800
Q9CQX8	28S ribosomal protein S36, mitochondrial	Mrps36	4	18813000	11707000	15536000	12729000	20101000	19415000	15472000	17646000	19096000	17958000	17155000	18499000	11715000	14858000	20822000	20754000
Q9D338	39S ribosomal protein L19, mitochondrial	Mrpl19	4	7046100	4599600	6563500	5045700	7110900	6130500	6785000	5671200	5587000	7659600	5745000	5483900	5550300	7309700	7125800	7003500
A0A1L1SSY9	39S ribosomal protein L4, mitochondrial	Mrpl4	4	7191400	5851700	7513800	4618300	8343100	6563100	7637500	7024200	5706900	8253400	8533400	6047800	7029300	7743500	7790000	7131500
Q9D0Q7	39S ribosomal protein L45, mitochondrial	Mrpl45	4	6634600	6110600	8620600	7263800	5745200	7281600	9327900	8172800	4404000	6481800	7986100	7323900	7919300	135792	113190	9672600
Q9CQ40	39S ribosomal protein L49, mitochondrial	Mrpl49	4	9119100	5535900	7770200	7121100	10143000	10690000	9321000	8724200	7248300	7683800	8391200	8418100	5821100	8422600	9564700	10394000
G3UWD3	3-hydroxybutyrate dehydrogenase type 2	Bdh2	4	8430500	4401000	7231500	4093300	7921500	6823800	4190400	7014100	4076400	8055000	7045600	4374200	1955300	6434200	4836400	6841600
A0A286YEB7	40S ribosomal protein S24	Rps24	4	53917000	65045000	54937000	60996000	59205000	33373000	59601000	62951000	69693000	60881000	66386000	66503000	69617000	45946000	41582000	41471000
A0A1L1SQA8	40S ribosomal protein S25	Rps25	4	152610000	81282000	132460000	88538000	163900000	146850000	120340000	147770000	121980000	136580000	119760000	152120000	111440000	102890000	145840000	132080000
Q8BRK8	5-AMP-activated protein kinase catalytic subunit alpha-2;5-AMP-activated protein kinase catalytic subunit alpha-1	Prkaa2;Prkaa1	4	103804	211200	67047.2	235301	157966	125371	124630	147941	159978	798660	792260	738550	182460	135792	879960	603120
O54950	5-AMP-activated protein kinase subunit gamma-1	Prkag1	4	103804	9359800	67047.2	2502900	157966	125371	124630	147941	297220	116128	143516	134110	2775200	317010	264900	152277
Q3TYT1	5-demethoxyubiquinone hydroxylase, mitochondrial	Coq7	4	7826000	11694000	8703700	9626500	5941900	8380100	8316500	6305500	9365400	10934000	9074500	7428300	10018000	9666300	12799000	8772800
P47955	60S acidic ribosomal protein P1	Rplp1	4	296870000	174830000	366610000	219340000	397130000	233380000	421340000	271390000	379900000	355060000	417350000	349780000	244430000	398560000	328220000	254700000
P19253	60S ribosomal protein L13a	Rpl13a	4	45605000	52339000	29836000	51249000	30618000	24883000	43212000	40542000	44852000	30262000	37533000	42896000	54190000	26940000	26310000	27918000
Q6ZWV7	60S ribosomal protein L35	Rpl35	4	27325000	39481000	24911000	33772000	25962000	28058000	22015000	35365000	29329000	29498000	21636000	34658000	40529000	20531000	23640000	22215000
Q6ZWZ4	60S ribosomal protein L36	Rpl36	4	29182000	38206000	22000000	35534000	23231000	21905000	23263000	33276000	30911000	26386000	18971000	32417000	44479000	17570000	20972000	20464000
Q9EST5	Acidic leucine-rich nuclear phosphoprotein 32 family member B	Anp32b	4	9941100	9686200	19309000	10113000	10406000	13016000	17096000	8424200	12865000	13542000	10624000	10825000	10233000	14618000	15107000	9025400
Q9Z2N8	Actin-like protein 6A	Actl6a	4	6955100	3897700	6746200	3739800	6488600	4586600	6031600	6789000	5516800	7242900	5130300	6609900	4646200	5777500	6041800	5779500
Q9QZB7	Actin-related protein 10	Actr10	4	1219200	1319700	1560700	1000100	1510500	1254000	1467300	1369500	1231100	1339800	1700400	1161900	891390	1702200	1452200	1206900
F6ZFT1	Acyl carrier protein;Acyl carrier protein, mitochondrial	Ndufab1	4	132680000	69150000	117730000	68561000	129440000	121450000	105040000	145120000	88210000	88104000	102850000	104260000	57106000	95463000	122590000	144420000
Q3UUI3	Acyl-coenzyme A thioesterase THEM4	Them4	4	12739000	7817900	12846000	8570200	19683000	10759000	14504000	13232000	9984200	17056000	13957000	15996000	10499000	19615000	10774000	12016000
Q9CR95	Adaptin ear-binding coat-associated protein 1	Necap1	4	3070400	3435900	4516600	3348000	157966	3419100	4208800	3944600	4286200	3932100	3857600	4082000	3950800	3316500	3368200	3386300
Q9R0Y5	Adenylate kinase isoenzyme 1	Ak1	4	103804	1617500	67047.2	1625100	157966	125371	124630	147941	159978	116128	143516	134110	1309200	135792	1283600	152277
P54822	Adenylosuccinate lyase	Adsl	4	103804	3307700	67047.2	4053300	157966	125371	996830	147941	159978	116128	143516	134110	3112000	1266200	113190	152277
P61211	ADP-ribosylation factor-like protein 1	Arl1	4	1451700	17546000	1573200	10054000	157966	1626100	2099700	1332600	2264900	2141600	1347500	1219000	17181000	2531300	1838400	1162900
Q9JKX6	ADP-sugar pyrophosphatase	Nudt5	4	5985300	5037200	4811700	5109900	7219400	6099400	5156500	7113200	4625100	5698300	4309700	5562400	5432500	5255000	6238800	5601700
Q8JZQ2	AFG3-like protein 2	Afg3l2	4	920510	24243000	887600	16706000	157966	4172800	5241100	147941	4181200	3010900	1075400	134110	22811000	5126100	4889000	972880
Q3UZG4	Aminoacyl tRNA synthase complex-interacting multifunctional protein 1;Endothelial monocyte-activating polypeptide 2	Aimp1	4	8577800	11141000	5958100	7310200	5376200	7696500	7888000	9179400	7055200	4534700	6503300	8622900	9899700	5692100	7654800	8018000
Q8R3V2	Aminoacyl tRNA synthase complex-interacting multifunctional protein 2	Aimp2	4	382340	6159300	321530	4760600	120180	648770	786740	402040	929710	375840	262260	283110	3569500	457260	497290	518070
Q8WTY4	Anamorsin	Ciapin1	4	2385300	2715100	3154400	2687900	2167000	3158400	2500400	2769200	3108300	2724400	2441800	3070200	1996000	2044200	2554400	3712400
P17426	AP-2 complex subunit alpha-1	Ap2a1	4	103804	3376300	67047.2	3170500	157966	125371	896960	147941	159978	116128	143516	134110	4276200	135792	113190	152277
Q9Z1T1	AP-3 complex subunit beta-1	Ap3b1	4	103804	2709600	67047.2	2271100	157966	125371	124630	147941	159978	116128	143516	134110	2275200	135792	113190	152277
P24721	Asialoglycoprotein receptor 2	Asgr2	4	5585900	9085400	4000100	6696900	4820300	7317600	8601500	5025300	8914800	6814900	7027500	7588800	6895700	7753500	5901000	5471200
Q8CBM2	Aspartyl/asparaginyl beta-hydroxylase	Asph	4	7019600	5735900	6307200	6471900	157966	4811700	4972800	5105500	5699300	6867400	4857900	5591400	7833700	6086600	3818700	5964200
F6U2C2	Ataxin-2	Atxn2	4	2736900	2518500	1527800	3328400	1708000	3182100	1494400	1988300	4056400	2008900	2845900	2207200	2990400	1611000	1755800	2340200
Q9CPQ8	ATP synthase subunit g, mitochondrial	Atp5l	4	21854000	98200000	23673000	82543000	22046000	24586000	28919000	19828000	24450000	21617000	19209000	18367000	80874000	31910000	29899000	22057000
A0A494B9Y0	ATPase family AAA domain-containing protein 1	Atad1	4	835360	3599400	1097100	5843300	157966	885900	1373700	911620	1162600	1713700	1622100	134110	6614900	2142400	753210	902280
Q6P542	ATP-binding cassette sub-family F member 1	Abcf1	4	2037700	3264500	67047.2	4181300	157966	125371	1620700	147941	1780900	116128	143516	134110	3884100	135792	113190	152277
P47857	ATP-dependent 6-phosphofructokinase, muscle type	Pfkm	4	2340200	3013900	2107100	3511400	157966	2018800	3052700	3013000	3800600	116128	143516	134110	2055500	3862400	3615200	2019000
Q9JHS4	ATP-dependent Clp protease ATP-binding subunit clpX-like, mitochondrial	Clpx	4	2574600	5414300	2611600	5679800	2201200	2483100	2709600	3403200	4300300	2408900	2703700	2996300	6718100	3136900	2524700	2138700
O88696	ATP-dependent Clp protease proteolytic subunit, mitochondrial	Clpp	4	5059100	16228000	4691700	14778000	5618800	7622300	7248100	5392300	8834100	8243600	6434000	7506700	14431000	7949500	6810700	5194100
P04919-2	Band 3 anion transport protein	Slc4a1	4	1492500	8971300	2437400	7960200	157966	1476900	124630	147941	2709600	3270500	2331600	1869300	6116500	1514600	113190	152277
E0CX98	Bax inhibitor 1	Tmbim6	4	13817000	17540000	12907000	16985000	10830000	10303000	9320400	9741900	8789900	8877300	8609200	8424100	13190000	9115100	8462700	9938300
Q3UHN9	Bifunctional heparan sulfate N-deacetylase/N-sulfotransferase 1;Heparan sulfate N-deacetylase 1;Heparan sulfate N-sulfotransferase 1	Ndst1	4	1049800	211200	939750	657370	157966	125371	1859600	147941	1431400	1489700	1716900	1607700	626450	1304100	113190	152277
E9PVU9	Bis(5-adenosyl)-triphosphatase	Fhit	4	2848800	1920600	2539500	2056400	2601800	2437600	2287200	5899000	4472300	3049400	5604900	5548100	2460500	2180900	2620000	3195500
E9Q705	BolA-like protein 3	Bola3	4	6296800	3722800	5399100	4154800	4968200	7094100	4859500	7345600	7094700	5418400	5877900	6250200	3085100	4460700	4650900	5571800
Q80W54	CAAX prenyl protease 1 homolog	Zmpste24	4	7567400	8377300	4940900	6235700	5347800	4799900	4419200	6251600	3119600	3843800	4318500	4297500	5219600	5154800	5145100	5404300
Q8C0S5	CAP-Gly domain-containing linker protein 1	Clip1	4	1814000	211200	1387500	906870	157966	1281800	1242400	1778800	1070400	1348300	1199100	808320	860030	1319100	1277700	1126500
Q8K354	Carbonyl reductase [NADPH] 3	Cbr3	4	3296800	2193100	4078900	2167000	2194100	2955600	1302800	2326600	2920300	2952900	1230700	2699700	989280	1677000	1510000	2607400
F6WR04	Cathepsin S	Ctss	4	13928000	10460000	21598000	9115400	22403000	18911000	19900000	15134000	16747000	30290000	22471000	24624000	8368500	19505000	14067000	11155000
P24668	Cation-dependent mannose-6-phosphate receptor	M6pr	4	18663000	10193000	15783000	10247000	17768000	17454000	15385000	18808000	16699000	14648000	14309000	17658000	10467000	13029000	16742000	17027000
Q9CQB5	CDGSH iron-sulfur domain-containing protein 2	Cisd2	4	8952100	5833600	6119800	6821800	8038500	7774300	6689800	8909800	7494600	8438700	6194200	8027200	6693500	6772900	8866300	6812500
P53996-2	Cellular nucleic acid-binding protein	Cnbp	4	27196000	19599000	20272000	22241000	31415000	32626000	23218000	28096000	32537000	30713000	35013000	39197000	16322000	25443000	24230000	35437000
Q924Z4	Ceramide synthase 2	Cers2	4	1006000	20491000	1032200	21643000	984970	1784000	3454300	147941	1871400	1945800	2005200	956670	16988000	2559300	2998200	1810700
Q9D8B3	Charged multivesicular body protein 4b	Chmp4b	4	4775600	2495700	3918900	2939000	5169200	4762100	3539700	4217900	4498000	4361800	4172400	3844500	2903500	3555100	4183600	3747000
A0A1B0GSH5	Chitinase domain-containing protein 1	Chid1	4	1313100	869770	963880	815640	378020	1360600	1433600	2179200	2633700	1360100	1324200	2221100	1256400	764080	704670	1444600
D3YUW7	Cingulin	Cgn	4	1050100	996090	1101200	727210	157966	1112700	979930	743490	2658000	520470	955310	1232800	182460	135792	1247100	152277
H3BJ30	Cleavage and polyadenylation specificity factor subunit 6	Cpsf6	4	8839300	6195700	6695500	6373300	10055000	10446000	7038800	8544500	9957400	10014000	9174000	10885000	7099800	9292800	9635400	9542300
Q9CQI6	Coactosin-like protein	Cotl1	4	748710	7092800	2738000	6326100	944480	1755800	2600200	2040100	3160900	3280700	3111200	2434300	6800100	3643400	2439000	1307300
Q78PG9	Coiled-coil domain-containing protein 25	Ccdc25	4	6569000	3319000	6182000	4277600	9486900	6545400	5613500	9749500	6296200	7004500	6537200	8378500	4435700	5960600	7818400	6086300
Q8K4M5	COMM domain-containing protein 1	Commd1;Gm28048	4	2268500	1651500	2072900	1704700	2280700	2695000	2687100	2457900	2911300	2759700	2337600	1982300	1672400	2259400	2315200	2062800
P03953-2	Complement factor D	Cfd	4	3181300	977670	2305900	1754200	4373100	4777800	2893500	5504400	5401900	13823000	6428900	6106000	3201800	5011900	4055600	5044500
O88543	COP9 signalosome complex subunit 3	Cops3	4	4896700	6728800	5192900	6491500	5967600	5894800	5540000	5079100	4925600	5806900	3766800	4750200	5899100	5112300	5435700	5399100
Q9WUM4	Coronin-1C;Coronin	Coro1c	4	5109300	5410500	5747100	4329800	6744500	4804400	6740700	6365700	4259900	8107800	6394800	7028000	6121900	6667400	4040800	4821400
Q06770	Corticosteroid-binding globulin	Serpina6	4	9384000	3581800	7803500	4032200	3978400	8331200	4757000	4681700	4603100	7162700	3889300	4113900	3743900	5760400	4879000	4474800
Q3TCH7	Cullin-4A	Cul4a	4	8073	2133700	17327	3691500	157966	16422	43791	147941	70394	16690	143516	134110	821290	19340	50476	14262
P97315	Cysteine and glycine-rich protein 1	Csrp1	4	9161300	4585100	7382300	4138600	5853500	7294900	5434800	9266600	10404000	9579900	8124600	8666700	3800200	7066700	7498700	7801800
A0A1W2P845	Cysteine and glycine-rich protein 2	Csrp2	4	1290300	1012700	1109800	1048000	1343000	1938100	1020800	1745100	1399700	1837600	1340000	1611400	699230	1314900	1328200	1800600
A0A3Q4L347	Cysteine dioxygenase type 1	Cdo1	4	8596100	7661200	6777200	6960900	5840800	9105700	124630	8161700	7964900	9166400	7327500	6166000	9456600	5944000	11152000	9233100
Q91XD7	Cysteine-rich with EGF-like domain protein 1	Creld1	4	1932100	1307500	1420200	1402300	1286600	1537700	1377800	1393900	1612900	1831000	1579800	1605600	1305400	1663800	1788100	1878500
Q921H9	Cytochrome c oxidase assembly factor 7	Coa7	4	20081000	9332000	16692000	9380300	23873000	15517000	13739000	15695000	13426000	14506000	12042000	13364000	9042400	11113000	17350000	15508000
P00405	Cytochrome c oxidase subunit 2	Mtco2	4	13445000	148700000	19332000	120630000	9765400	21381000	31048000	14666000	18256000	8411000	9046400	7986200	100420000	22857000	30527000	29915000
Q9DCW5	Cytochrome c oxidase subunit 6A, mitochondrial;Cytochrome c oxidase subunit 6A1, mitochondrial	Cox6a1	4	35671000	39484000	30803000	40589000	21461000	31472000	35406000	28447000	23629000	12588000	23886000	16908000	31404000	23200000	36910000	49443000
Q64462	Cytochrome P450 4B1	Cyp4b1	4	103804	5398400	3277100	7204000	157966	125371	2523100	147941	855730	2216600	143516	2538100	4866300	1419000	113190	152277
Q8R1Q8	Cytoplasmic dynein 1 light intermediate chain 1	Dync1li1	4	2269400	2091500	67047.2	1574900	157966	2192500	124630	147941	159978	116128	143516	134110	2621400	135792	113190	1054600
Q9CXR1	Dehydrogenase/reductase SDR family member 7	Dhrs7	4	103804	4624300	4708600	5209700	3356700	3232700	124630	147941	159978	116128	2202400	134110	4537700	3987400	2917400	2277000
E9Q4M8	Delta(14)-sterol reductase	Tm7sf2	4	3827200	4134300	2674400	4531700	157966	5129700	2391400	3125400	3010500	1705500	3915800	2428900	3837300	3190800	5074300	6812100
P31001	Desmin	Des	4	1734700	7222000	1679200	3036900	157966	1888800	1705800	1900900	159978	1708700	1962800	1907300	2759000	1683300	113190	2076800
P32233	Developmentally-regulated GTP-binding protein 1	Drg1	4	5147000	5279200	5348500	4825300	6265700	4577400	6982400	6809400	4480600	6974400	6095600	7353100	6006400	6612700	5378000	4118500
Q3TYL7	DnaJ homolog subfamily B member 1	Dnajb1	4	1368700	2675300	1255300	2223700	1632600	1751300	1016500	1449400	1675100	930470	2003600	1607900	1871900	1705800	1487100	1621900
O70152	Dolichol-phosphate mannosyltransferase subunit 1	Dpm1	4	103804	1648900	67047.2	1328400	157966	125371	124630	147941	159978	116128	143516	134110	1630300	135792	113190	152277
A2A5R8	Double-stranded RNA-binding protein Staufen homolog 1	Stau1	4	3172600	3434100	3150800	3890100	1195800	2602100	2134400	2931700	2497300	1799600	2963600	3264600	2950500	1519100	1351300	2338500
Q9D0M5	Dynein light chain 2, cytoplasmic;Dynein light chain 1, cytoplasmic	Dynll2;Dynll1	4	19323000	13752000	19421000	13492000	20360000	19112000	16531000	22366000	18453000	17819000	22679000	23543000	12181000	18126000	14321000	17033000
P62627	Dynein light chain roadblock-type 1	Dynlrb1	4	12807000	8047000	13377000	8990500	12393000	12540000	13598000	12735000	12046000	11505000	10641000	12254000	7788600	11130000	13699000	11332000
E9Q9X1	Dystonin	Dst	4	248330000	212490000	239430000	227270000	324420000	270310000	233970000	442110000	266280000	247310000	257920000	305350000	204660000	268240000	273530000	297150000
Q62165	Dystroglycan;Alpha-dystroglycan;Beta-dystroglycan	Dag1	4	5387400	3098900	4001200	4207600	6138800	5897000	3989500	4918200	4006500	5347300	5333400	4940800	2280100	3233600	4229300	4937300
Q9ET26	E3 ubiquitin-protein ligase RNF114	Rnf114	4	3336900	2317000	3083500	2526200	3110600	3754600	2907300	3192900	3428600	3504200	2631000	2748300	2484300	2539400	2829100	2907000
Q8VBV3	Exosome complex component RRP4	Exosc2	4	2802300	2089900	4277300	235301	4096100	3328300	3162300	4316600	3459100	4997900	3825700	3767900	2288300	3667100	3436900	3452300
Q3TDN2-2	FAS-associated factor 2	Faf2	4	103804	5895200	67047.2	4751500	157966	125371	124630	147941	1276500	116128	143516	134110	4939500	135792	113190	152277
Q920L1	Fatty acid desaturase 1	Fads1	4	103804	4390900	67047.2	3210300	157966	125371	124630	147941	159978	116128	143516	134110	3883400	135792	113190	152277
P61148	Fibroblast growth factor 1	Fgf1	4	2342600	1259300	2809200	1480600	4650900	2749500	2340800	3054300	2263900	2460100	2801300	2358600	1577600	3066600	2196300	2643200
O35943	Frataxin, mitochondrial;Frataxin intermediate form;Frataxin mature form	Fxn	4	28364000	18376000	24692000	16560000	36507000	20127000	17796000	25818000	20472000	24908000	26672000	26087000	17847000	23904000	26108000	25856000
P05063	Fructose-bisphosphate aldolase C	Aldoc	4	1209300	1576100	67047.2	1181700	157966	1164600	2596800	3504100	2643200	2798200	3027600	1983000	1901300	1787800	2234600	2058100
D3YWS7	Fucose mutarotase	Fuom	4	24449000	11141000	21415000	11355000	27380000	20504000	25255000	27150000	17013000	28237000	22682000	21099000	12696000	24920000	26005000	23113000
Q8R3R8	Gamma-aminobutyric acid receptor-associated protein-like 1	Gabarapl1	4	14337000	5713600	11429000	7970200	8436600	15232000	11290000	15607000	11154000	13345000	13642000	12656000	6623300	11592000	9572300	13117000
E0CZ04	Gamma-glutamylaminecyclotransferase	Ggact	4	12276000	7447300	9859600	7411600	14617000	8648000	8845100	14200000	12876000	12081000	11866000	12434000	9439100	11571000	10217000	10844000
Q9D8T2	Gasdermin-D	Gsdmdc1	4	103804	5711100	2078400	4833700	157966	125371	2721800	1059700	2823800	116128	143516	134110	6481200	2766900	113190	152277
Q9D7M1	Glucose-induced degradation protein 8 homolog	Gid8	4	5028700	3797900	5922700	3321600	2397000	5297900	7558300	4137900	5581100	5882600	5646000	4625300	4168700	4978900	7024300	4590000
Q711T7	Glutamine-dependent NAD(+) synthetase	Nadsyn1	4	3662500	2135900	4003600	2163000	3294000	2575000	4880800	2656900	2527500	3331200	3575800	2917600	2244400	4336000	3283000	3787900
P46412	Glutathione peroxidase 3	Gpx3	4	21121000	8497600	19787000	8374000	21679000	17073000	16425000	20031000	17147000	28063000	10372000	19925000	9986100	20582000	16220000	16891000
Q91WK5	Glycine cleavage system H protein, mitochondrial	Gcsh	4	139510000	52194000	112110000	61019000	129400000	96742000	86962000	117470000	89753000	111780000	117860000	113190000	50244000	103710000	111370000	82611000
A2ATI9	Golgi reassembly-stacking protein 2	Gorasp2	4	6460500	5737400	4171600	6432300	3824500	4437500	4882100	4339900	7092500	4122400	4853700	4782900	5550100	3750400	3607400	4096500
Q3U9N4	Granulins;Acrogranin;Granulin-1;Granulin-2;Granulin-3;Granulin-4;Granulin-5;Granulin-6;Granulin-7	Grn	4	177150	1806200	1165400	1320600	934670	343920	520920	1050500	1177700	3197600	1891600	3889600	482120	1174300	330120	1117100
A0A0G2JGP4	GTPase NRas	Nras;Hras	4	15947000	6023500	13423000	6691700	14024000	14062000	11381000	15250000	13406000	14371000	13018000	16042000	10055000	15579000	14045000	13334000
A0A571BEI3	Guanine nucleotide-binding protein G(s) subunit alpha isoforms short;Guanine nucleotide-binding protein G(s) subunit alpha isoforms XLas	Gnas	4	1893900	3516900	1499300	3102000	157966	1331400	1843500	1542300	2427400	1590900	2052100	1292700	4431900	2228200	2347400	1626700
P21278	Guanine nucleotide-binding protein subunit alpha-11;Guanine nucleotide-binding protein subunit alpha-14	Gna11;Gna14	4	103804	2356800	26010	2020500	157966	49035	112690	147941	240560	44190	143800	151750	3213700	216480	158660	155330
G3UVV4	Hexokinase;Hexokinase-1	Hk1	4	937570	1241700	1842900	1607400	1251400	1450900	1711300	1342000	1543300	1904800	1608700	1311600	1307500	1647700	1523300	1515000
P62748	Hippocalcin-like protein 1	Hpcal1	4	11418000	6187200	12935000	6743200	11971000	10021000	11137000	8822700	7044300	7112900	7273900	9318000	6087600	11086000	8773800	8859100
Q91VF2	Histamine N-methyltransferase	Hnmt	4	2885600	10692000	6321000	6807500	157966	3530100	4054000	2196000	2097600	2822400	2374400	2278000	8163100	4768200	3640900	3315500
Q3THW5	Histone H2A.V;Histone H2A.Z;Histone H2A	H2afv;H2afz	4	244120000	222330000	199660000	232850000	257690000	305610000	208650000	194690000	262750000	321320000	209070000	267130000	400900000	281750000	249500000	421600000
Q8CBB6	Histone H2B;Histone H2B type 1-P;Histone H2B type 1-K;Histone H2B type 1-C/E/G;Histone H2B type 2-B;Histone H2B type 1-H;Histone H2B type 1-B;Histone H2B type 1-M;Histone H2B type 1-F/J/L;Histone H2B type 3-A;Histone H2B type 3-B;Histone H2B type 2-E	Hist1h2br;Hist1h2bp;Hist1h2bk;Hist1h2bc;Hist2h2bb;Hist1h2bh;Hist1h2bb;Hist1h2bm;Hist1h2bf;Hist3h2ba;Hist3h2bb;Hist2h2be	4	327010000	417670000	295120000	308570000	356420000	412560000	241340000	294410000	282810000	420260000	231980000	371110000	1076200000	370020000	283920000	682930000
P01837	Immunoglobulin kappa chain C region		4	34477000	16146000	28705000	15592000	22167000	20629000	18841000	18719000	32546000	76993000	39742000	38650000	8927300	15637000	21939000	6494900
P01654	Immunoglobulin kappa chain V-III region PC 2880/PC 1229;Immunoglobulin kappa chain V-III region MOPC 70;Immunoglobulin kappa chain V-III region PC 7132;Immunoglobulin kappa chain V-III region 50S10.1	Igkv3-2	4	10612000	3973900	67047.2	3589500	6255100	125371	124630	147941	18624000	28334000	7585700	19625000	4052100	135792	4581100	152277
Q61559	IgG receptor FcRn large subunit p51	Fcgrt	4	6189500	4811300	6141400	4601500	5252700	6299200	5021700	5209800	6579100	4923300	6271400	6939000	4302500	5119600	6426100	6262900
O88792	Junctional adhesion molecule A	F11r	4	10421000	5527600	10692000	7215600	14540000	7577400	8383500	9478100	13035000	13988000	10118000	14947000	7052300	8745500	12095000	13128000
Q61595-15	Kinectin	Ktn1	4	6769600	7398400	5559600	7966500	157966	6927300	5052500	6679300	9397500	8447900	7076000	3307500	7145100	8372200	5699900	6017100
F8WGN6	Kinesin-like protein;Kinesin-like protein KIF21A	Kif21a	4	6956000	6444400	8259000	6421400	8243900	5789900	6858500	8397400	7189000	8715400	8103400	8775500	7019900	8590700	7473800	7923300
D3YVR4	LDLR chaperone MESD	Mesdc2	4	5826300	2487500	2720400	3445000	4753700	4197500	4323500	6753400	6756900	6995000	5122300	7566500	2975100	4421000	6278500	4959000
O89017	Legumain	Lgmn	4	21614000	29959000	19298000	32122000	18995000	25237000	28778000	20103000	49179000	37742000	35596000	38954000	25755000	28528000	22710000	28445000
Z4YJR1	Lipase maturation factor;Lipase maturation factor 1	Lmf1	4	1242800	2953900	1895300	2640800	1895100	125371	2560400	1716300	1520600	1426700	964740	1335600	1518200	1199900	1654900	1142600
Q99KG5-3	Lipolysis-stimulated lipoprotein receptor	Lsr	4	3570200	2560200	1423800	2003400	1444000	2187800	2147000	3195000	4095300	3401800	2249800	3293200	2771500	3406100	3216800	3519800
Q9Z0M5	Lysosomal acid lipase/cholesteryl ester hydrolase	Lipa	4	30775000	76992000	43900000	71400000	40432000	35585000	25931000	24684000	28222000	26437000	33553000	28982000	78812000	37714000	34957000	34514000
P11438	Lysosome-associated membrane glycoprotein 1	Lamp1	4	27448000	14726000	27717000	17649000	27507000	27399000	23950000	29714000	31538000	30019000	32217000	35803000	14856000	25132000	21803000	27607000
G3XA66	Metaxin-1	Mtx1	4	103804	6977600	67047.2	7016500	1569300	125371	2441000	147941	1759300	1533500	143516	134110	6930100	2935400	2215200	1958300
E9QJW0	Microsomal glutathione S-transferase 1	Mgst1	4	741810000	943920000	1063700000	947380000	254050000	469400000	536710000	829620000	348890000	152250000	429730000	280640000	668240000	516770000	942370000	1202300000
Q791T5-2	Mitochondrial carrier homolog 1	Mtch1	4	4882000	3838000	1854100	4052700	157966	3541000	2281700	2074000	2087500	1964200	2897800	1395100	3383100	2815100	2201000	2814000
Q9D880	Mitochondrial import inner membrane translocase subunit TIM50	Timm50	4	283120	10843000	422860	11891000	157966	640410	388410	134890	731790	363170	172050	460550	6706300	594600	354700	492780
Q9CPQ3	Mitochondrial import receptor subunit TOM22 homolog	Tomm22	4	5111400	7689000	5598000	8108900	5835000	6429100	8559700	5076300	4988000	5752900	5854000	4677500	6876000	6750300	6218800	6168300
P53986	Monocarboxylate transporter 1	Slc16a1	4	103804	6302800	67047.2	4781900	157966	125371	124630	147941	159978	116128	143516	134110	4704500	135792	113190	152277
P21440	Multidrug resistance protein 3	Abcb4	4	103804	1707900	67047.2	1580400	157966	125371	124630	147941	159978	116128	143516	134110	2037700	135792	113190	152277
Q8K5B2	Multiple coagulation factor deficiency protein 2 homolog	Mcfd2	4	35059000	20503000	43315000	23375000	29115000	35523000	44761000	33780000	38270000	28001000	32132000	37340000	20610000	37018000	39550000	33720000
A0A0A6YWB0	Muscleblind-like protein 1	Mbnl1	4	3852900	2778200	3146300	2986000	3472900	3048400	2908300	3415800	3476100	2957700	3147400	3138400	2531200	2598000	2841800	3464300
Q7TPV4	Myb-binding protein 1A	Mybbp1a	4	16816000	40333000	28114000	31640000	157966	20997000	54141000	12583000	13546000	23297000	28639000	16979000	33759000	30396000	113190	27870000
Q9Z2C5	Myotubularin	Mtm1	4	3461000	1685800	2574500	2085900	2534600	2373900	2778700	3249900	2557900	2871700	3881700	2768100	1675300	2632900	3185300	2355700
Q9QZ08	N-acetyl-D-glucosamine kinase	Nagk	4	1785300	2103000	2385800	3083100	157966	2887700	3135300	2120200	2446100	3608400	1927400	134110	2118800	1675600	3395600	152277
Q9JKL4	NADH dehydrogenase [ubiquinone] 1 alpha subcomplex assembly factor 3	Ndufaf3	4	3820700	3375800	4696200	3877100	3625800	4686700	6277100	3728100	6296700	4992700	6681800	5246600	4546500	5010600	5211000	6573400
Q9CQ75	NADH dehydrogenase [ubiquinone] 1 alpha subcomplex subunit 2	Ndufa2	4	22389000	13308000	17003000	12847000	10467000	19014000	18553000	17038000	14177000	5790300	13578000	11637000	8951000	11364000	26985000	30997000
Q9CQZ5	NADH dehydrogenase [ubiquinone] 1 alpha subcomplex subunit 6	Ndufa6	4	6221300	12920000	4879200	10968000	4430400	5548300	5130900	5680300	4622600	2530400	5143400	4174900	9785500	3057600	7504800	10205000
Q9Z1P6	NADH dehydrogenase [ubiquinone] 1 alpha subcomplex subunit 7	Ndufa7	4	8179400	7412500	6422300	7227800	4733400	8858100	6770700	7210800	4975600	2925400	6764800	5432400	4836300	4763300	7657200	12790000
E9QPX3	NADH dehydrogenase [ubiquinone] iron-sulfur protein 4, mitochondrial	Ndufs4	4	49617000	37176000	50987000	36382000	33948000	49217000	46052000	38625000	34653000	20335000	39708000	28978000	28774000	40922000	83440000	79382000
B1ARW4	NADH dehydrogenase [ubiquinone] iron-sulfur protein 5;NADH dehydrogenase [ubiquinone] iron-sulfur protein 5, N-terminally processed	Ndufs5	4	27265000	18495000	23166000	17839000	13477000	24239000	20921000	21331000	17220000	10883000	18637000	14996000	14498000	17158000	29497000	34686000
P52503	NADH dehydrogenase [ubiquinone] iron-sulfur protein 6, mitochondrial	Ndufs6	4	23251000	11893000	18945000	11706000	12661000	22246000	20205000	19108000	16209000	8426700	16762000	14781000	7972800	15711000	23762000	28082000
A0A494BAW8	NADH dehydrogenase [ubiquinone] iron-sulfur protein 8, mitochondrial	Ndufs8	4	33601000	25589000	33752000	23141000	4014200	32207000	37129000	25329000	27256000	15836000	23945000	23073000	22049000	28045000	49186000	45358000
E9QP46	Nesprin-2	Syne2	4	9827300	6026600	8300400	6654200	9651700	8428000	6660700	11103000	9458700	6642100	9308500	11958000	6628900	6788000	10342000	15436000
Q91YP2	Neurolysin, mitochondrial	Nln	4	103804	4033300	67047.2	3190400	1267900	125371	124630	2126200	159978	116128	2058400	134110	3568500	135792	1357600	1092500
D6RFN5	Ninjurin-1	Ninj1	4	5582000	4252600	4290700	5298300	6115800	5472700	6475600	6648700	7515700	4974400	7523300	7269900	4311000	4469400	4719500	5769400
Q3UKN6	Nucleobindin-2;Nesfatin-1	Nucb2	4	1377300	211200	1728600	235301	2408200	1267400	2800600	2689900	4473300	2872800	143516	3293400	182460	1709100	1326000	1055000
Q8VE38-2	Oxidoreductase NAD-binding domain-containing protein 1	Oxnad1	4	4941400	4800900	5473500	3989200	6298500	4760600	4762700	7215400	4643700	4485700	4210400	4423500	4597500	4205300	4718800	4756900
D3Z754	Oxysterol-binding protein;Oxysterol-binding protein-related protein 1	Osbpl1a	4	5875300	7195900	6851100	6797300	2123900	4676300	6175200	6880200	4427700	4948400	6692600	3723100	7820800	7175600	5279400	5392800
Q8BFQ8	Parkinson disease 7 domain-containing protein 1	Pddc1	4	10540000	3396800	10022000	4522200	15248000	8527100	9034400	8736000	9187200	9967900	6939700	8801600	4477300	8202700	8894800	6592100
Q8BFY6	Peflin	Pef1	4	3149400	4201400	3453900	4355100	157966	2902000	3958400	2728500	2868900	3684000	2657600	2463100	4956900	3044000	3268000	2786800
Q14C51	Pentatricopeptide repeat domain-containing protein 3, mitochondrial	Ptcd3	4	103804	3881900	455180	1926900	157966	1108100	1304500	147941	854430	116128	864450	809080	6322700	465070	1290300	405830
A2AKD6	Peroxisomal membrane protein 4	Pxmp4	4	103804	18557000	39935	18079000	157966	50846	380680	147941	234750	116128	143516	134110	19387000	218050	422190	152277
O70362	Phosphatidylinositol-glycan-specific phospholipase D	Gpld1	4	2123200	2055600	1283800	1670000	2265600	1773200	2890500	2339200	3091600	2175500	2734800	2362300	3010800	2648800	2361000	1646400
A0A1L1SRA9	Phosphopantothenoylcysteine decarboxylase	Ppcdc	4	3106100	1971700	3215500	1869900	2072400	3510500	2213500	3766400	159978	116128	2734000	2675500	1916500	1844100	2900000	2250100
Q8R574	Phosphoribosyl pyrophosphate synthase-associated protein 2	Prpsap2	4	8094500	4848700	7449300	4878500	6470100	6843800	6247600	7802700	5313200	6022000	7710800	5957100	4851500	8363400	8190900	5028400
F7DF70	Phosphorylase b kinase regulatory subunit beta	Phkb	4	103804	2760800	67047.2	1818100	157966	125371	124630	147941	159978	116128	143516	134110	1757600	135792	113190	152277
Q61206	Platelet-activating factor acetylhydrolase IB subunit beta	Pafah1b2	4	29827000	12308000	31997000	15387000	37029000	22974000	30775000	26292000	23092000	30376000	24309000	30588000	15647000	30792000	26182000	28191000
D3Z2X5	Platelet-activating factor acetylhydrolase IB subunit gamma	Pafah1b3	4	10163000	4369600	11238000	4388000	10572000	5981700	8344500	8901700	6814600	10619000	7123400	8142700	5137400	11700000	8222200	6891500
F8WI31	Pleiotropic regulator 1	Plrg1	4	665240	712980	799510	1067000	824300	920340	809020	927820	946380	1097600	1475200	1124800	880840	979160	746730	1009100
Q99KP6	Pre-mRNA-processing factor 19	Prpf19	4	2427300	5044200	4875100	2252800	4479000	3367300	8244300	2342200	7198500	5762900	4252900	4374000	6914000	6997400	5785400	4290100
Q8BHA3-2	Probable D-tyrosyl-tRNA(Tyr) deacylase 2	Dtd2	4	15901000	8152000	16062000	8481600	16070000	11792000	15889000	17005000	10367000	13610000	14987000	16340000	7765700	11397000	13911000	13508000
Q8R0J8	Probable gluconokinase	Idnk	4	103804	6019900	67047.2	3719500	157966	1845700	3128400	147941	1564800	116128	1237200	940290	3896100	1210800	1955900	1125800
P49935	Pro-cathepsin H;Cathepsin H mini chain;Cathepsin H;Cathepsin H heavy chain;Cathepsin H light chain	Ctsh	4	162570000	72162000	150400000	82982000	202650000	124830000	128850000	138070000	139110000	134050000	137560000	174900000	64992000	145000000	111030000	119350000
Q9JK53	Prolargin	Prelp	4	1871400	6297400	67047.2	3528000	157966	2067800	3174500	1505100	3480000	4226100	143516	1332100	3626300	4595700	2985800	152277
P17918	Proliferating cell nuclear antigen	Pcna	4	2158000	211200	2395000	2229400	157966	2717500	3225300	3030000	2865900	2576400	2416000	2407900	2439000	135792	2511100	2813200
Q5SSW2	Proteasome activator complex subunit 4	Psme4	4	103804	1856300	67047.2	1326900	157966	125371	124630	147941	159978	116128	143516	134110	1431900	135792	113190	152277
Q9DAU1	Protein canopy homolog 3	Cnpy3	4	9631200	9545500	8452800	4182100	13317000	8967300	7423300	11857000	10279000	10148000	9734800	14370000	7736700	7658100	8547300	9246200
D5MCW4	Protein CutA	Cuta	4	27467000	15553000	28160000	15703000	40552000	26353000	31726000	30890000	24800000	31256000	27237000	26780000	16557000	29697000	28945000	27242000
Q8CGA0	Protein phosphatase 1F	Ppm1f	4	1199600	2044700	822560	3558500	157966	1247600	1487500	147941	2653700	908220	143516	907700	2144300	1154200	1281000	1116100
D3Z3A0	Protein phosphatase inhibitor 2	Ppp1r2	4	3951200	3144500	4046300	3514900	5094400	4999600	2796500	4315500	3788500	4237800	3604600	3994700	3598000	4275200	3834900	5885600
S4R294	Protein PRRC2C	Prrc2c	4	929220	532020	789080	704920	700780	1185600	857110	1773600	1003000	1172600	1175200	1850300	659970	649120	700630	885560
Q8BK67	Protein RCC2	Rcc2	4	1987200	2053300	2330000	1516100	4278300	125371	2322600	2042000	159978	4367300	2155400	134110	2585400	2629400	113190	1981500
Q91V77	Protein S100;Protein S100-A1	S100a1	4	90073000	48448000	89038000	48460000	100730000	83876000	85789000	88880000	65169000	100970000	88647000	70041000	45536000	87392000	85958000	89908000
P31725	Protein S100-A9	S100a9	4	22528000	15980000	37762000	16573000	39287000	32509000	35945000	26836000	33693000	39873000	36254000	32157000	14090000	29779000	25017000	22340000
Q9D662	Protein transport protein Sec23B	Sec23b	4	103804	2948300	67047.2	2623700	157966	125371	124630	147941	493110	116128	143516	134110	2671700	640720	113190	152277
Q9CQG1	Putative glutathione-specific gamma-glutamylcyclotransferase 2	Chac2	4	3520800	2687100	2673000	2724200	3508500	5140900	4056700	4189500	3732200	4502300	4041100	2519700	3233600	3860000	3194600	2772100
Q8BKZ9	Pyruvate dehydrogenase protein X component, mitochondrial	Pdhx	4	4451600	11572000	4670900	9625400	157966	4824400	6092500	1848300	3273800	3357200	3320700	134110	8488400	5733600	5721700	3414400
D3Z6I4	Quinone oxidoreductase-like protein 1	Cryzl1	4	3602900	2657100	2993900	3411300	3306200	3047100	3014700	3527400	2811100	3007600	3425900	2997000	3118800	2918300	2757200	3821200
Q9D1L9	Ragulator complex protein LAMTOR5	Lamtor5	4	11778000	7175000	10181000	7165500	15656000	12758000	11265000	13191000	14883000	16060000	10628000	13096000	7039000	9907700	11892000	10863000
P97379-2	Ras GTPase-activating protein-binding protein 2	G3bp2	4	3057700	3033100	2763400	3607200	1873300	4235600	3526400	3164800	3514800	2431500	3150000	3060500	2671900	1835200	1538500	3454700
P56371	Ras-related protein Rab-4A	Rab4a	4	4318500	2410600	2707400	2640600	4399700	3273900	5049800	3666000	4156000	3050700	2684600	3743600	3072800	3922400	3294400	3848800
P55258	Ras-related protein Rab-8A	Rab8a	4	4009800	7290600	4227100	6950200	3885200	5375300	6599400	4205000	7135600	6199500	6140700	6368400	8240400	6626500	5439500	5565600
Q8BU31	Ras-related protein Rap-2c	Rap2c	4	3719300	1974500	3608500	2072200	3722000	2913200	3454000	3412400	2795800	3995200	3384100	3088000	2257500	3489700	3020700	3275300
P10833	Ras-related protein R-Ras	Rras	4	8502900	5920400	6292400	6192200	9862500	7712200	6073900	7479400	8773200	11178000	6843800	8388700	5793600	9533400	7164700	8968500
P47968	Ribose-5-phosphate isomerase	Rpia	4	1965100	967330	1538400	987300	546670	2663700	1107600	2131000	1446600	1494900	1633100	1866200	925070	1333600	1543800	2311200
Q9D6S7	Ribosome-recycling factor, mitochondrial	Mrrf	4	9873700	5650800	9162400	6199000	11286000	8597900	8524100	11270000	9615500	10476000	10001000	11191000	5534700	8010200	9988000	8284900
E9Q7N5	Ribosome-releasing factor 2, mitochondrial	Gfm2	4	103804	3397000	67047.2	2120300	157966	125371	124630	147941	159978	116128	143516	1815300	2849000	1465500	113190	152277
Q8VEE0	Ribulose-phosphate 3-epimerase	Rpe	4	12388000	7818100	13140000	7033500	16440000	8781200	13406000	13649000	12909000	11401000	10750000	10236000	8536200	11789000	16100000	9341100
E9Q8F0	RNA-binding protein 39	Rbm39	4	2481000	2886500	67047.2	2751400	157966	2680300	124630	147941	3731200	116128	4053500	134110	3638900	135792	113190	152277
P35550	rRNA 2-O-methyltransferase fibrillarin	Fbl	4	3169300	4914700	2104000	5025600	4139100	3122200	2556200	3084100	3282000	2972900	3049300	2937100	7905200	2685700	3119700	3238500
A0A0U1RNT6	S-adenosylmethionine synthase isoform type-2	Mat2a	4	19794000	24396000	17809000	26801000	22409000	20824000	16108000	18679000	18248000	17827000	16312000	15498000	17907000	18317000	25100000	20791000
Q80YR5	Scaffold attachment factor B2	Safb2	4	2880300	4582800	2547800	4846600	157966	5616400	3228700	3124800	4643100	3767700	3582500	4556900	5324200	3423000	3517800	3684500
E0CX80	Selenoprotein P	Sepp1	4	4394900	2734200	3476900	2316700	4575700	3953200	4257400	4252800	4267500	4527100	5358100	5076800	2387200	3657800	3155900	3016400
O35453	Serine protease hepsin;Serine protease hepsin non-catalytic chain;Serine protease hepsin catalytic chain	Hpn	4	7325800	4719700	7990000	4618700	8117500	8712300	6895300	6893900	6756200	5802500	5744000	8073400	5443400	8184400	6686700	7517900
Q91WP6	Serine protease inhibitor A3N;Serine protease inhibitor A3C;Serine protease inhibitor A3G	Serpina3n;Serpina3g;Serpina3c	4	3430600	3195700	2086100	6337700	4115900	3986600	2056000	147941	8004900	2482900	2223400	3165200	1938700	2353200	113190	152277
Q8BTI8-3	Serine/arginine repetitive matrix protein 2	Srrm2	4	3985500	2824900	3850100	2831700	3431800	4748900	4093900	3264000	3601700	3486400	3803000	5080600	4153600	3073800	4070300	2668800
A0A3Q4EH04	Serine/arginine-rich splicing factor 7	Srsf7	4	57560000	29747000	54361000	36869000	68531000	56641000	63296000	56001000	53249000	58346000	48459000	66117000	39111000	62845000	48799000	49512000
Q8BKX6	Serine/threonine-protein kinase SMG1	Smg1	4	3725300	2974800	3578100	3058400	3886200	125371	3316400	4616800	3703300	3860500	4400700	4026000	2813800	3247200	3696100	3675900
P63328-2	Serine/threonine-protein phosphatase 2B catalytic subunit alpha isoform	Ppp3ca	4	76972000	62866000	51626000	64758000	58340000	72141000	49985000	79785000	60412000	50679000	60999000	73149000	29914000	53784000	73263000	60115000
P97470	Serine/threonine-protein phosphatase 4 catalytic subunit	Ppp4c	4	3888800	1980200	3958300	2426000	6269300	4102000	4276600	5612700	2703100	6209700	4555600	5466000	2392300	4712600	5011400	5039400
Q9JJL8	Serine--tRNA ligase, mitochondrial	Sars2	4	1609600	211200	1007900	235301	157966	2511600	1580600	1316000	727770	1647100	1726100	1619600	182460	1873000	1660000	1889900
Q8BG73	SH3 domain-binding glutamic acid-rich-like protein 2;SH3 domain-binding glutamic acid-rich-like protein	Sh3bgrl2	4	11865000	8328900	13591000	8134000	10703000	10206000	10373000	12007000	7249000	7379900	8385000	7979200	9230200	10277000	8176400	10380000
Q925N0	Sideroflexin-5;Sideroflexin	Sfxn5	4	103804	4675000	67047.2	3947900	157966	125371	124630	147941	159978	116128	143516	134110	3601400	135792	113190	152277
O55242	Sigma non-opioid intracellular receptor 1	Sigmar1	4	14423000	9609400	12238000	9980500	11821000	9653300	9724200	10230000	9275300	9586000	10566000	11263000	9395200	8341000	12060000	10954000
Q9D104	Signal recognition particle 19 kDa protein	Srp19	4	8213500	4587300	9870900	4971000	10329000	7808500	8781400	10259000	8645300	9079200	8363800	10169000	5515600	8880100	7660500	7762500
P47758	Signal recognition particle receptor subunit beta	Srprb	4	3486400	5187700	4361600	5546600	157966	2802600	3878600	4602900	5184300	4140100	3069300	134110	6181400	3593300	4369000	152277
P62305	Small nuclear ribonucleoprotein E	Snrpe	4	61410000	25878000	56768000	24767000	60053000	50811000	59302000	51727000	57359000	76769000	68435000	65379000	30054000	68783000	45069000	47366000
Q6ZWQ5	Sorting nexin-12	Snx12	4	7450200	7237500	6566800	6678700	7900700	6358700	6861900	6553300	8996000	8653600	6993500	6947000	9118500	7504600	6426200	7497700
G5E866	Splicing factor 3B subunit 1	Sf3b1	4	103804	8632100	2647700	4419600	2761100	2624500	2603900	2641200	698900	682440	143516	134110	7318600	808050	1802400	2276200
Q8QZY9	Splicing factor 3B subunit 4	Sf3b4	4	5876000	3168900	5419300	3305400	5568500	4695500	6452200	5005500	6193900	7225100	6805200	5557600	4250400	6265700	6438000	5254200
Q80VJ2	Steroid receptor RNA activator 1	Sra1	4	7070100	1731600	10191000	8241700	8475300	7613900	8808600	5620700	11248000	7723800	8893400	9679800	2998300	10498000	7640100	9956100
Q91VZ6	Stromal membrane-associated protein 1	Smap1	4	3628400	3034000	3254200	3670700	3400400	3332000	3734700	3809500	4035600	3067800	3323600	3515800	2965300	3064200	2797100	3082900
Q9CU62	Structural maintenance of chromosomes protein 1A	Smc1a	4	20569000	10197000	19770000	13382000	20726000	23590000	16630000	23908000	19401000	21238000	24121000	20580000	9758300	17550000	19808000	24430000
A0A494B9B9	Succinate dehydrogenase assembly factor 2, mitochondrial	Sdhaf2	4	7119200	4277000	5861900	4529800	9811300	5629900	6193400	6200800	4618000	5155100	4974700	4954800	3657500	6114900	8494200	6772400
Q3UJQ9	Succinyl-CoA:3-ketoacid-coenzyme A transferase;Succinyl-CoA:3-ketoacid coenzyme A transferase 1, mitochondrial	Oxct1	4	1459100	676190	941460	971340	2152600	1200700	765510	832880	2535600	2308600	1442600	1917000	415310	1119200	113190	1128500
Q8R0F3	Sulfatase-modifying factor 1	Sumf1	4	2713900	1407400	1731900	235301	2017100	2200200	2100900	2175400	2338000	2234500	2157000	1935900	1504900	1885000	2093300	152277
Q64310	Surfeit locus protein 4	Surf4	4	103804	32961000	67047.2	27135000	157966	821230	2036800	147941	1861200	116128	143516	214540	26171000	1777400	1935200	406620
Q9D5V6	Synapse-associated protein 1	Syap1	4	7232800	5214600	7196800	5551600	7187500	6400800	6650300	5655700	5008100	5475300	6423600	5360400	5873500	9757900	6919900	7569400
Q9ERB0	Synaptosomal-associated protein 29	Snap29	4	4460600	3654800	3096800	3519100	5022500	6490000	3092600	4678800	4859600	4448000	5217300	5612200	3749300	3768700	4169700	5938500
Q8R570	Synaptosomal-associated protein 47	Snap47	4	103804	2500600	67047.2	4286400	157966	125371	2293100	147941	159978	116128	143516	134110	3354600	135792	113190	152277
Q9ER00	Syntaxin-12	Stx12	4	4585800	2778400	4700600	2464000	4168100	4788200	4523400	3894600	3402300	4563900	3892600	5772300	3078000	4310800	4772500	2843400
E9Q7H6	Threonine--tRNA ligase, mitochondrial	Tars2	4	2306000	2787800	2297700	2390000	2596500	2059200	2707100	2735400	1927100	1746400	3514900	2218300	2394200	2310100	2174200	2316100
Q62264	Thyroid hormone-inducible hepatic protein	Thrsp	4	13678000	15887000	17378000	15242000	7658900	14483000	18161000	15166000	2665800	1427800	10131000	4220200	21524000	7331400	20217000	19869000
F8WJG3	Transformer-2 protein homolog beta	Tra2b	4	29392000	13405000	23199000	14098000	20840000	27583000	20650000	32812000	24570000	29590000	30070000	30759000	15301000	24139000	23403000	27471000
P63028	Translationally-controlled tumor protein	Tpt1	4	56093000	53054000	73807000	58831000	53874000	61881000	83715000	49938000	76781000	66472000	54955000	60500000	55979000	64836000	76084000	75700000
Q9D8L3	Translocon-associated protein subunit delta	Ssr4	4	27925000	53881000	26601000	50166000	28453000	34571000	50942000	26128000	56611000	42907000	33398000	42749000	56704000	38922000	34401000	30324000
D3Z6S1	Transmembrane protein 214	Tmem214	4	103804	4264900	67047.2	4936500	157966	125371	3872300	147941	1903500	116128	143516	134110	4567400	135792	113190	152277
Q5F285	Transmembrane protein 256	Tmem256	4	46545000	28555000	34621000	27291000	39053000	43985000	33802000	37500000	23803000	22452000	26793000	30806000	24107000	34648000	49607000	52890000
A0A0R4J1Z3	Transmembrane protein 33	Tmem33	4	103804	17032000	1811600	8115900	157966	1306200	1195600	147941	1804900	2755200	1891000	134110	5945200	135792	113190	1658600
A0A0A0MQA5	Tubulin alpha-4A chain	Tuba4a	4	11714000	83484000	14354000	70114000	14478000	18435000	26474000	13669000	30655000	22041000	15110000	17760000	78379000	23578000	16390000	15795000
Q9D1E6	Tubulin-folding cofactor B	Tbcb	4	4494800	2802000	4054100	3216200	4155700	3922900	3577300	5523500	3758900	4153700	4297300	4438900	2596200	3499800	3639000	5080900
Q6PE01	U5 small nuclear ribonucleoprotein 40 kDa protein	Snrnp40	4	4956800	3746400	5927200	3635900	6217200	6197300	6610900	4206900	5776300	7364200	4886400	6125600	4705500	6780300	5011300	5605300
B7ZBY7	Ubiquitin-conjugating enzyme E2 variant 2;Ubiquitin-conjugating enzyme E2 variant 1	Ube2v1;Gm20431;Ube2v2	4	30821000	43685000	34647000	33947000	27231000	26152000	26479000	31247000	29267000	31332000	24066000	38215000	31795000	21557000	41595000	25693000
A0A0R4J078	UBX domain-containing protein 4	Ubxn4	4	2819600	3397800	4020900	6078100	3681700	3493700	4187500	3516500	4126800	2367300	2046300	2427100	4462600	3689700	2301600	3224300
Q3TW96	UDP-N-acetylhexosamine pyrophosphorylase-like protein 1	Uap1l1	4	3551400	2412800	3483800	2178800	3621400	2395700	3327100	3494800	4016300	4545600	3309600	3445100	2734300	2820600	2953200	2370800
E9Q175	Unconventional myosin-VI	Myo6	4	103804	211200	67047.2	235301	157966	125371	124630	147941	159978	116128	143516	134110	182460	135792	113190	152277
Q8BX70-2	Vacuolar protein sorting-associated protein 13C	Vps13c	4	103804	211200	453110	235301	157966	125371	124630	147941	159978	116128	143516	134110	182460	496500	113190	152277
P40336	Vacuolar protein sorting-associated protein 26A	Vps26a	4	2175300	13465000	2721300	6110500	3106900	125371	2724600	2655300	2890000	3008000	1942400	134110	4298200	3525100	113190	2391000
Q8K0M3	Vinexin	Sorbs3	4	2611200	2399100	3549700	2425200	3166700	2792700	2903600	3241700	4436200	4493300	3859200	2885000	2751000	2559300	3591600	2746500
Q9QYC7	Vitamin K-dependent gamma-carboxylase	Ggcx	4	103804	12073000	67047.2	7360100	157966	125371	1127600	147941	159978	116128	143516	134110	4978300	135792	113190	152277
Q91V09	WD repeat-containing protein 13	Wdr13	4	1294600	855780	1588800	787930	943300	1403700	1324600	1208900	1571400	1351000	1587700	1501000	1070200	1195800	1099700	1110200
Q9ERF3	WD repeat-containing protein 61;WD repeat-containing protein 61, N-terminally processed	Wdr61	4	3102000	3603300	4343900	4140700	2957300	3723200	5046300	3465100	5284700	4662100	4513500	3620900	3943400	4632900	4166600	3612900
Q8BYK6	YTH domain-containing family protein 3	Ythdf3	4	3120200	4880900	4384900	4258900	4831000	2431600	4538800	4870300	5309000	5387100	4429900	5691200	5139600	4732300	4491200	4238700
B1ATP7	Zinc phosphodiesterase ELAC protein 2	Elac2	4	6290800	3288200	7381200	4720900	9736800	6177600	6474700	6034900	5160600	7728900	6203300	5723300	3569900	6570100	5853800	5696700
G3X8U3	Queuosine salvage protein	2210016F16Rik	4	103804	5881700	67047.2	4571400	157966	909210	704930	147941	769080	116128	143516	134110	4324300	1211900	649090	152277
B1AR51	Dynein, axonemal, heavy chain 9	Dnah9	4	226400000	152130000	186410000	125390000	214390000	251580000	167170000	233250000	169780000	215670000	206690000	204430000	117360000	179410000	206240000	250980000
G3UYJ7	Predicted gene 20441	Gm20441	4	11008000	56942000	11344000	53635000	6857000	17520000	11308000	7289900	10613000	7598600	8387100	4121400	38030000	12231000	13729000	10905000
Q61635	GTP-binding protein	Ifi47	4	103804	1441400	67047.2	1452300	157966	125371	760270	147941	944550	907150	143516	545130	2292000	635280	113190	152277
E9Q3L2	Phosphatidylinositol 4-kinase alpha	Pi4ka	4	103804	337320	235350	284800	293940	257450	269260	319320	308280	291630	284070	229140	217910	218520	227780	311940
E9QAT4-2	Protein transport protein Sec16A	Sec16a	4	33826000	25443000	29266000	25986000	27786000	26402000	20592000	28508000	159978	25472000	24706000	134110	34083000	22867000	113190	26665000
A2AKQ0-2	Nucleotide sugar transporter SLC35D1	Slc35d1	4	103804	5115200	260500	6696700	157966	125371	124630	147941	159978	116128	143516	134110	5223700	408830	113190	152277
A0A338P7E3	Ribonuclease T2B	Rnaset2b	4	4443200	4416800	3197700	3807100	2547400	4670500	4429500	3637700	5433200	4214200	4205500	4610100	4293800	3782000	3649700	5364200
Q8BFP9	[Pyruvate dehydrogenase (acetyl-transferring)] kinase isozyme 1, mitochondrial	Pdk1	3	103804	6149000	67047.2	5294200	157966	125371	124630	147941	159978	116128	143516	134110	4525800	135792	739910	152277
P58871	182 kDa tankyrase-1-binding protein	Tnks1bp1	3	3302700	2900200	3077500	2064400	4058200	3185600	2577800	2747400	3661200	2786600	1993000	3955500	2767800	2702500	2162800	3114100
Q9D517	1-acyl-sn-glycerol-3-phosphate acyltransferase gamma	Agpat3	3	103804	4842500	67047.2	3752500	157966	125371	124630	147941	159978	116128	143516	134110	2853800	135792	113190	152277
Q9DC71	28S ribosomal protein S15, mitochondrial	Mrps15	3	6323100	4466700	6000000	4019800	8599800	8727600	6485400	6872400	5629500	6421200	6835700	7821900	4857100	6498200	6438900	5906700
Q9CQE3	28S ribosomal protein S17, mitochondrial	Mrps17	3	5826200	4410600	6323000	4388000	6728500	4282400	6934300	6259600	4230100	6579100	5225400	5445700	5702400	8193500	5967600	4602500
Q99N84	28S ribosomal protein S18b, mitochondrial	Mrps18b	3	2824500	2325400	3460200	2529700	3211100	3312500	4105100	4321800	2724600	2968600	3010900	2889200	2369400	2569200	2013100	3472000
Q80ZS3	28S ribosomal protein S26, mitochondrial	Mrps26	3	6445000	5409000	6714700	5458700	9034000	6390100	7238000	6712800	6492100	7276600	8876800	6609200	6834300	6084900	7502300	6585500
Q61733	28S ribosomal protein S31, mitochondrial	Mrps31	3	1608800	2262600	1492600	2149800	1416000	1441000	1852500	1254300	1447700	1384500	1436100	1186100	2428200	1638900	1573400	1492900
Q99N87	28S ribosomal protein S5, mitochondrial	Mrps5	3	2345000	3881200	1776300	2874200	2758400	2604900	1894300	2478100	2106500	2393300	143516	2332100	4029500	1901400	2512000	2420700
Q99N93	39S ribosomal protein L16, mitochondrial	Mrpl16	3	103804	3733700	67047.2	3439100	157966	125371	124630	147941	159978	116128	143516	134110	3496500	135792	113190	152277
Q9CQL5	39S ribosomal protein L18, mitochondrial	Mrpl18	3	4120600	3458700	2535400	3912200	5482500	4092600	4147600	4552500	3599700	3704900	4519400	3057100	4066300	3622800	5604600	5026100
Q9D1N9	39S ribosomal protein L21, mitochondrial	Mrpl21	3	2324500	2757700	2112100	2435600	2751100	125371	3441100	2785500	2705200	3339500	2954400	2867500	2634400	3130000	3282700	2829300
Q9CPW3	39S ribosomal protein L54, mitochondrial	Mrpl54	3	3795300	2276200	3974100	2854800	3881800	4275400	4087400	4829200	4185400	4316900	4091700	6164500	2316900	3643700	3437000	5547600
Q99N94	39S ribosomal protein L9, mitochondrial	Mrpl9	3	1074700	1013000	1173000	1321800	157966	125371	1644900	1169500	866850	1558900	1307900	134110	2447500	1931300	113190	1603800
A0A0R4J136	3-oxo-5-alpha-steroid 4-dehydrogenase 1	Srd5a1	3	103804	3421400	67047.2	3312600	157966	125371	124630	147941	159978	116128	143516	134110	4034900	135792	113190	152277
P62855	40S ribosomal protein S26	Rps26	3	37065000	40532000	36074000	39974000	46214000	23328000	38546000	42159000	45380000	45277000	41553000	48362000	44053000	32084000	21966000	33324000
A0A0G2JDW7	40S ribosomal protein S27	Rps27	3	16652000	16005000	14461000	13596000	8672500	18051000	16244000	19629000	20195000	17457000	18857000	23262000	16177000	13261000	10754000	17638000
P62274	40S ribosomal protein S29	Rps29	3	23479000	14382000	21871000	18506000	19546000	21538000	24191000	29073000	26015000	25419000	23482000	25226000	16061000	19359000	20877000	26967000
P67984	60S ribosomal protein L22	Rpl22	3	96469000	77462000	78760000	78430000	79653000	98647000	92226000	98674000	91851000	95922000	82621000	92733000	89672000	71445000	94002000	75169000
O55142	60S ribosomal protein L35a	Rpl35a	3	26124000	26013000	15844000	22757000	17811000	13148000	19006000	23759000	23816000	15331000	20977000	24237000	25475000	12580000	17170000	16265000
O88455	7-dehydrocholesterol reductase	Dhcr7	3	103804	3818600	1545000	4767000	157966	125371	124630	147941	159978	116128	143516	134110	1728700	1647400	113190	152277
Q9CPW4	Actin-related protein 2/3 complex subunit 5	Arpc5	3	37065000	25028000	31158000	25698000	38444000	38451000	30284000	34544000	35878000	42818000	36844000	39809000	29981000	30616000	43114000	39223000
[truncated: 766 more rows]

## Sheet: Significant different proteins
																				MWrn 10m / MWT10m						MWrn 4m / MWT 4m						MWT 4m / MWT 10m						MWrn 4m / MWrn 10m						MWrn 4m / MWT 10m
Accession	ProteinNames	GeneNames	RazorUniquePeptides	MWrn10m_2970	MWrn10m_2971	MWrn10m_2972	MWrn10m_2973	MWrn4m_3026	MWrn4m_3029	MWrn4m_3123	MWrn4m_3124	MWT10m_3048	MWT10m_3049	MWT10m_3051	MWT10m_3052	MWT4m_3000	MWT4m_3001	MWT4m_3014	MWT4m_3017	mean_g1 MWrn10m_MWT10m	mean_g2 MWrn10m_MWT10m	Ratio_g1_g2 MWrn10m_MWT10m	log2Ratio MWrn10m_MWT10m	zscore MWrn10m_MWT10m	pval_Limma MWrn10m_MWT10m	mean_g1 MWrn4m_MWT4m	mean_g2 MWrn4m_MWT4m	Ratio_g1_g2 MWrn4m_MWT4m	log2Ratio MWrn4m_MWT4m	zscore MWrn4m_MWT4m	pval_Limma MWrn4m_MWT4m	mean_g1 MWT4m_MWT10m	mean_g2 MWT4m_MWT10m	Ratio_g1_g2 MWT4m_MWT10m	log2Ratio MWT4m_MWT10m	zscore MWT4m_MWT10m	pval_Limma MWT4m_MWT10m	mean_g1 MWrn4m_MWrn10m	mean_g2 MWrn4m_MWrn10m	Ratio_g1_g2 MWrn4m_MWrn10m	log2Ratio MWrn4m_MWrn10m	zscore MWrn4m_MWrn10m	pval_Limma MWrn4m_MWrn10m	mean_g1 MWrn4m_MWT10m	mean_g2 MWrn4m_MWT10m	Ratio_g1_g2 MWrn4m_MWT10m	log2Ratio MWrn4m_MWT10m	zscore MWrn4m_MWT10m	pval_Limma MWrn4m_MWT10m
P19096	Fatty acid synthase;[Acyl-carrier-protein] S-acetyltransferase;[Acyl-carrier-protein] S-malonyltransferase;3-oxoacyl-[acyl-carrier-protein] synthase;3-oxoacyl-[acyl-carrier-protein] reductase;3-hydroxyacyl-[acyl-carrier-protein] dehydratase;Enoyl-[acyl-carrier-protein] reductase;Oleoyl-[acyl-carrier-protein] hydrolase	Fasn	98	3240000	113000000	7250000	90600000	917000	6800000	9410000	3430000	3800000	2160000	3380000	1520000	76500000	6720000	14600000	5650000	53532275	2714475	19.721	4.30166	3.86656	0.0274088	5.13846e+06	25869975	0.198627	-2.33187	-2.77647	0.0867847	25869975	2714475	9.53038	3.25253	3.70083	0.0140377	5.13846e+06	53532275	0.0959881	-3.381	-3.32318	0.0832508	5.13846e+06	2714475	1.89299	0.920664	2.1461	0.44675
Q9DBM2	Peroxisomal bifunctional enzyme;Enoyl-CoA hydratase/3,2-trans-enoyl-CoA isomerase;3-hydroxyacyl-CoA dehydrogenase	Ehhadh	37	17700000	164000000	26000000	147000000	14900000	21700000	32700000	26400000	15300000	18000000	17500000	12200000	116000000	25300000	31900000	14000000	88661250	15755250	5.62741	2.49247	2.1833	0.0343512	23922250	46780500	0.511372	-0.967554	-1.02481	0.38339	46780500	15755250	2.9692	1.57007	1.71761	0.0888527	23922250	88661250	0.269816	-1.88995	-1.77264	0.118383	23922250	15755250	1.51837	0.60252	1.44604	0.0582561
P06801	NADP-dependent malic enzyme;Malic enzyme	Me1	31	342000000	199000000	357000000	216000000	220000000	172000000	161000000	226000000	48300000	59800000	122000000	74200000	185000000	166000000	309000000	286000000	278555000	76013750	3.66453	1.87363	1.60754	0.00044461	194620000	236507500	0.822891	-0.281226	-0.143625	0.356098	236507500	76013750	3.11138	1.63755	1.79715	0.00098981	194620000	278555000	0.698677	-0.517302	-0.34522	0.0920694	194620000	76013750	2.56033	1.35633	3.10476	0.00105087
E9Q1Y3	Apolipoprotein B-100;Apolipoprotein B-48	Apob	30	695000	69900000	633000	25900000	665000	171000	209000	778000	206000	169000	93100	97300	60500000	154000	428000	711000	2.42877e+07	141353	171.823	7.42478	6.77229	0.009137	455748	15447150	0.0295037	-5.08296	-6.30863	0.321806	15447150	141353	109.28	6.77189	7.8493	0.0852335	455748	2.42877e+07	0.0187645	-5.73585	-5.77199	0.0427182	455748	141353	3.22417	1.68893	3.83664	0.0297314
Q5SWU9	Acetyl-CoA carboxylase 1;Biotin carboxylase	Acaca	28	5500000	57700000	11900000	58000000	7100000	7380000	21000000	4690000	160000	7650000	6630000	4050000	35100000	12000000	6170000	8400000	33288625	4.62349e+06	7.19988	2.84797	2.51406	0.0489423	10036250	15413525	0.651133	-0.618977	-0.577267	0.432933	15413525	4.62349e+06	3.33374	1.73714	1.91454	0.095562	10036250	33288625	0.301492	-1.72981	-1.60611	0.148414	10036250	4.62349e+06	2.17071	1.11816	2.5807	0.171812
[truncated: 143 more rows]
[truncated: 6 more columns]
