# Supplementary material for: Integrated liver and serum proteomics uncover sexual dimorphism and alteration of several immune response proteins in an aging Werner syndrome mouse model
Source: Aging (Albany NY). 2024 May 24;16(10):8417–45. doi: 10.18632/aging.205866 (PMC11164518; doi:10.18632/aging.205866)
Supplement: Supplementary Table 6 [file aging-16-205866-s007.xls]

## Sheet: Females
Supplementary Table 6. Two-way ANOVA of proteins associated with clusters and gene ontology analyses in the liver of both females and males.
Females				Two-way ANOVA
	Accession	GeneNames	Cluster	Two-way ANOVA p value Age	Two-way ANOVA p value Genotype	Two-way ANOVA p value Age x Genotype		Gene Ontology
	A0A0R4J0I1	Serpina3k	Cluster -1	0.000194184	0.123008	0.0479191
	Q6XVG2	Cyp2c54	Cluster -1	0.0169857	0.295592	0.0938558
	P97501	Fmo3	Cluster -1	0.0590565	0.235197	0.218365
	P15392	Cyp2a4	Cluster -1	0.143021	0.846059	0.24229		Cluster -1
	Q63880-2	Ces3a	Cluster -1	0.00631427	0.203938	0.271473		No significant GO term
	Q8VCU1	Ces3b	Cluster -1	0.000598428	0.0346256	0.36154
	P07310	Ckm	Cluster -1	0.0177676	0.483273	0.405388
	P32848	Pvalb	Cluster -1	0.0401735	0.859318	0.449958
	P03953-2	Cfd	Cluster -1	0.0207668	0.220168	0.476369
	Q8QZR1	Tat	Cluster -1	0.0139499	0.164881	0.611382
	Q63836	Selenbp2	Cluster -1	0.00679524	0.734113	0.637151
	Q9DBE0	Csad	Cluster -1	0.0105861	0.283533	0.67272
	O70250	Pgam2	Cluster -1	0.00850294	0.798807	0.762813
	A0A0R4IZW5	Cdh1	Cluster -1	0.00176486	0.0960601	0.798498
	E9Q0W2	Slco1a1	Cluster -1	0.0330655	0.211839	0.887489
	Q9DCY0	Keg1	Cluster -1	0.0786167	0.540482	0.96958
	Q9D1M7	Fkbp11	Cluster -1	0.00505155	0.350512	0.987705
	Q8BWW3	Pgm3	Cluster -2	0.830279	0.27387	0.147642		Cluster -2
	Q05816	Fabp5	Cluster -2	0.116591	0.057636	0.362541		No significant GO term
	Q9QYH6	Maged1	Cluster -2	0.201175	0.186119	0.812208
	Q3UJQ9	Oxct1	Cluster -3	0.109649	0.132302	0.0154277
	Q3UTJ2-2	Sorbs2	Cluster -3	0.251913	0.183753	0.0443547
	Q9CYA0	Creld2	Cluster -3	0.00626598	0.0246805	0.102133		Cluster -3
	Q921F4	Hnrnpll	Cluster -3	0.00562036	0.279394	0.123109		No significant GO term
	Q924Z4	Cers2	Cluster -3	0.57356	0.261176	0.166775
	Q9CQ19	Myl9	Cluster -3	0.0723347	0.392741	0.177482
	P50295	Nat2	Cluster -3	0.239117	0.904075	0.253623
	P52480-2	Pkm	Cluster -3	0.0688574	0.394712	0.544308
	P37804	Tagln	Cluster -3	0.41882	0.15076	0.63748
	Q9WVF5	Egfr	Cluster -3	0.0287259	0.0824121	0.67128
	A0A1L1SUX8	Thy1	Cluster -3	0.234323	0.18729	0.827776
	Q6P4T2	Snrnp200	Cluster -4	0.822615	0.987169	0.00159474		Cluster -4
	B1AV14	Apool	Cluster -4	0.166415	0.169259	0.00646921		No significant GO term
	G3X949	Traf3ip3	Cluster -4	0.966999	0.257766	0.0575785
	P12790	Cyp2b9	Cluster -4	0.26106	0.0465109	0.0590123
	A0A075B5M7	Igkv5-39	Cluster -4	0.275228	0.45115	0.0769323
	Q09200	B4galnt1	Cluster -4	0.39593	0.256391	0.111148
	E9Q4M8	Tm7sf2	Cluster -4	0.51723	0.212869	0.174275
	A2AQN5	Acss2	Cluster -5	0.0391096	0.050703	0.0286416		Cluster -5
	Q8VC73	BC021614	Cluster -5	0.0263629	0.516238	0.103126		No significant GO term
	P06801	Me1	Cluster -5	0.061153	0.180151	0.1679
	Q8R1B4	Eif3c	Cluster -5	0.256035	0.0171888	0.179315
	O35744	Chil3	Cluster -5	0.038013	0.222136	0.351778		Cluster -6
	P46664	Adss	Cluster -5	0.141468	0.0469935	0.406137		Term	Bonferroni p-value	Proteins
	Q99L88	Sntb1	Cluster -6	0.288549	0.0338361	0.99953		GO:0016064~immunoglobulin mediated immune response	6.78843e-05	Ighv1-62-3, Ighm, Ighg2b, Ighv1-76
	A0A075B5P3	Ighg2b	Cluster -6	0.118091	0.00625714	0.966604		GO:0050871~positive regulation of B cell activation	0.000137047	Ighv1-62-3, Ighm, Ighg2b, Ighv1-76
	P06328	Ighv1-62-3	Cluster -6	0.0101891	0.0130671	0.29047		GO:0006910~phagocytosis, recognition	0.000145588	Ighv1-62-3, Ighm, Ighg2b, Ighv1-76
	A0A0B4J1N0	Ighv1-76	Cluster -6	0.0037213	0.00806074	0.793331		GO:0006911~phagocytosis, engulfment	0.00019363	Ighv1-62-3, Ighm, Ighg2b, Ighv1-76
	A0A075B5P6	Ighm	Cluster -6	0.0117432	0.0174876	0.779545		GO:0006958~complement activation, classical pathway	0.000196274	Ighv1-62-3, Ighm, Ighg2b, Ighv1-76
	P52843	Sult2a1	Cluster -6	0.0940408	0.0751006	0.652923		GO:0050853~B cell receptor signaling pathway	0.000207094	Ighv1-62-3, Ighm, Ighg2b, Ighv1-76
	Q91Z98	Fabp7	Cluster -7	0.218701	0.760276	0.187255		GO:0042742~defense response to bacterium	0.00125286	Ighv1-62-3, Ighm, Ighg2b, Ighv1-76
	P10648	Gsta2	Cluster -7	0.457052	0.199664	0.186791		GO:0045087~innate immune response	0.00686072	Ighv1-62-3, Ighm, Ighg2b, Ighv1-76
	A0A075B5M2	Igkv4-61	Cluster -7	0.117724	0.0803249	0.656343
	A0A075B5V6	Ighv1-42	Cluster -7	0.0160124	0.0525037	0.592428		Cluster -7
	A0A140T8N5	Igkv6-23	Cluster -7	0.014338	0.0170852	0.214131		Term	Bonferroni p-value	Proteins
	A2AMH3	Slc44a1	Cluster -7	0.0465103	0.0788727	0.0644145		GO:0006749~glutathione metabolic process	0.00728342	Gsta2, Gsta1
	P13745	Gsta1;Gsta2	Cluster -7	0.0423334	0.23727	0.215018		GO:0006805~xenobiotic metabolic process	0.0134195	Gsta2, Gsta1
	Q6P8Q0	Gsta1	Cluster -7	0.0843894	0.191313	0.194434
	Q9D154	Serpinb1a	Cluster -8	0.00209815	0.875243	0.797539
	A0A075B5P5	Ighg3	Cluster -8	0.00571987	0.727001	0.477278		Cluster -8
	D3YTL5	Capg	Cluster -8	0.0534448	0.730938	0.495274		No significant GO term
	O89032-3	Sh3pxd2a	Cluster -8	0.0391915	0.590692	0.566103
	P01645	Ig kappa chain V-V region HP 93G7	Cluster -8	0.0631001	0.816395	0.52865
	P01837	Igkc	Cluster -8	0.000403683	0.0205384	0.913037
	G3UWD3	Bdh2	Cluster -8	0.0033342	0.279555	0.930935
	P16045	Lgals1	Cluster -8	0.00212955	0.416504	0.408936
	E9QAH1	Golgb1	Cluster -8	0.0101299	0.326946	0.440429
	Q9NYQ2	Hao2	Cluster -8	0.0105851	0.346426	0.314009
	Q91Z98	Chil4	Cluster -8	0.0118016	0.457108	0.258221
	E9QNW6	Pafah2	Cluster -8	0.114822	0.274659	0.982861
	A0A075B5T3	Ighv6-6	Cluster -8	0.0401652	0.318179	0.85986
	Q19LI2	A1bg	Cluster -8	0.0536614	0.459082	0.673966

## Sheet: Males
Males				Two-way ANOVA
	Accession	GeneNames	Cluster	Two-way ANOVA p value Age	Two-way ANOVA p value Genotype	Two-way ANOVA p value Age x Genotype		Gene Ontology
	P08071	Ltf	Cluster -1	0.152361	0.11868	0.000353424
	Q00915	Rbp1	Cluster -1	0.229273	0.0555319	0.00610834		Cluster -1
	Q3UJQ9	Oxct1	Cluster -1	0.0687681	0.865664	0.0289858		No significant GO term
	P18528	Ig heavy chain V region 6.96	Cluster -1	0.273535	0.540668	0.0352737
	P49710	Hcls1	Cluster -1	0.441495	0.69338	0.0494524
	A0A140T8P9	Igkv14-126	Cluster -1	0.49735	0.96212	0.0518688
	A0A075B5V6	Ighv1-42	Cluster -2	0.00438712	0.0305354	0.00416615		Cluster -2
	A0A0A6YY53	Ighg2c	Cluster -2	0.00447915	0.2796	0.0197721		Term	Bonferroni p-value	Proteins
	A0A075B5P3	Ighg2b	Cluster -2	0.00144	0.111612	0.0245085		GO:0016064~immunoglobulin mediated immune response	0.00207602	Ighg2b, Iglc1, Ighv1-42, Ighg2c
	A0A0G2JE99	Iglc1	Cluster -2	0.00470889	0.0189817	0.027596		GO:0050871~positive regulation of B cell activation	0.00416147	Ighg2b, Iglc1, Ighv1-42, Ighg2c
	P01645	Ig kappa chain V-V region HP 93G7	Cluster -2	0.0118531	0.190082	0.0722848		GO:0006910~phagocytosis, recognition	0.00441764	Ighg2b, Iglc1, Ighv1-42, Ighg2c
	Q3U9N4	Grn	Cluster -2	0.0616292	0.17001	0.204436		GO:0006911~phagocytosis, engulfment	0.00585386	Ighg2b, Iglc1, Ighv1-42, Ighg2c
	Q61702	Itih1	Cluster -2	0.0518054	0.0333224	0.370293		GO:0006958~complement activation, classical pathway	0.00593271	Ighg2b, Iglc1, Ighv1-42, Ighg2c
	P01654	Igkv3-2	Cluster -2	0.022724	0.114643	0.445048		GO:0050853~B cell receptor signaling pathway	0.00625505	Ighg2b, Iglc1, Ighv1-42, Ighg2c
	Q3UHN9	Ndst1	Cluster -2	0.029919	0.234965	0.468351		GO:0042742~defense response to bacterium	0.0362709	Ighg2b, Iglc1, Ighv1-42, Ighg2c
	P01837	Igkc	Cluster -3	0.00334399	0.687832	0.00937191
	O35744	Chil3	Cluster -3	0.000120163	0.707892	0.0120271
	Q7TN29-2	Smap2	Cluster -3	0.00353396	0.010762	0.016339		Cluster -3
	A0A075B5M7	Igkv5-39	Cluster -3	0.0223172	0.00248399	0.0454838		No significant GO term
	P14438	H2-Aa	Cluster -3	0.146963	0.0618014	0.0518326
	A0A075B5P6	Ighm	Cluster -3	0.000283279	0.29901	0.104018
	B1AZ15	Cobll1	Cluster -3	0.00438997	0.101882	0.153934
	A0A075B5P5	Ighg3	Cluster -3	0.0128456	0.842987	0.18263
	P46935	Nedd4	Cluster -3	0.0156348	0.0396961	0.189618
	D3YUW7	Cgn	Cluster -3	0.028473	0.412001	0.225433
	Q91WP6	Serpina3n	Cluster -3	0.041378	0.394192	0.40317
	F6UP77	Amdhd2	Cluster -3	0.106809	0.109304	0.412537
	Q80VD1	Fam98b	Cluster -4	0.275238	0.03772	0.27488
	P49442	Inpp1	Cluster -4	0.802375	0.0742136	0.323128		Cluster -4
	Q9CRC0	Vkorc1	Cluster -4	0.78443	0.11508	0.367424		No significant GO term
	Q9CWV0	Malsu1	Cluster -4	0.339014	0.00558992	0.431092
	A2AWT6	Ubtf	Cluster -4	0.756707	0.0329362	0.574052
	Q64735-2	Cr1l	Cluster -4	0.863939	0.0265899	0.94338
	P49182	Serpind1	Cluster -5	0.00489351	0.0165566	0.00686955
	Q8CH18	Ccar1	Cluster -5	0.0349424	0.283454	0.0440741		Cluster -5
	A0A1D5RLS1	Eps15l1	Cluster -5	0.047476	0.577094	0.0825824		No significant GO term
	Q3ULW8-2	Parp3	Cluster -5	0.0230635	0.0729182	0.11197
	D6RFU9	Sypl;Sypl1	Cluster -5	0.059519	0.527691	0.264717
	P04919-2	Slc4a1	Cluster -5	0.00516808	0.731787	0.277022
	Q99MR6-3	Srrt	Cluster -5	0.00497771	0.0321416	0.303117
	Q8BVY0	Rsl1d1	Cluster -5	0.34662	0.392562	0.320733
	Q8VE88-2	Fam114a2	Cluster -5	0.130763	0.293457	0.332065
	Q64737	Gart	Cluster -5	0.280351	0.213265	0.468851
	D3YU80	Cirbp	Cluster -5	0.0367597	0.390055	0.658758
	Q64378	Fkbp5	Cluster -5	0.137686	0.265151	0.75672
	B1AZ46	Baiap2	Cluster -5	0.188165	0.129778	0.826675
	Q60991	Cyp7b1	Cluster -5	0.437973	0.256673	0.914991
	Q283N4	Urad	Cluster -6	0.102198	0.000102786	1.88439e-05
	P33146	Cdh15	Cluster -6	0.0247907	0.0123185	8.82361e-05		Cluster -6
	P19157	Gstp1	Cluster -6	0.0208626	0.0303078	0.000369928		No significant GO term
	O35405	Pld3	Cluster -6	0.010933	0.01434	0.00053375
	Q8VCU1	Ces3b	Cluster -6	0.0672675	0.00817318	0.000845373
	Q00898	Serpina1e	Cluster -6	0.551	0.000708791	0.0016332
	A2AKN8	Mup8	Cluster -6	0.13336	0.0352693	0.00192776
	P03953-2	Cfd	Cluster -6	0.48027	0.00331493	0.00321829
	B5X0G2	Mup17	Cluster -6	0.0964672	0.234025	0.00424653
	P58044	Idi1	Cluster -6	0.209824	0.0160047	0.00553909
	Q8R519	Acmsd	Cluster -6	0.773891	0.0359016	0.00985201
	Q9QXZ6	Slco1a1	Cluster -6	0.00371757	0.0272586	0.0158207
	H3BIX4	Nptn	Cluster -6	0.162751	0.459376	0.031088
	B1AZA8	Tmem245	Cluster -6	0.205465	0.742792	0.0323669
	Q05816	Fabp5	Cluster -6	0.841602	0.012923	0.0562616
	Q80V26	Impad1	Cluster -6	0.415899	0.079283	0.0616777
	A0A0R4IZW5	Cdh1	Cluster -6	0.416027	0.0106491	0.0856703
	Q9D1C3	Pyurf	Cluster -6	0.0984255	0.0409975	0.121477
	B8JI96	Mup14	Cluster -6	0.399665	0.828701	0.132135
	Q8BHC0	Lyve1	Cluster -6	0.219665	0.0102743	0.135757
	J3JS94	Lage3	Cluster -6	0.216473	0.00662789	0.13903
	Q5SGK3	Aox2	Cluster -6	0.0362084	0.0890151	0.869673
	P06801	Me1	Cluster -7	0.0194135	0.00265431	0.000377628
	P0DN34	Ndufb1	Cluster -7	0.00954911	0.00306181	0.000391708		Cluster -7
	P67778	Phb	Cluster -7	0.028021	0.0320177	0.00244521		No significant GO term
	Q8BK48	Ces2e	Cluster -7	0.205316	0.000230663	0.00831158
	Q62264	Thrsp	Cluster -7	0.0255232	0.0301453	0.00838553
	Q8BFU3-5	Rnf214	Cluster -7	0.0208791	0.0170828	0.0340213
	P48771	Cox7a2	Cluster -7	0.108812	0.0383317	0.0441369
	Q8VCC1	Hpgd	Cluster -7	0.0451166	0.264381	0.0626881
	Q8BGY7	Fam210a	Cluster -7	0.289516	0.0180161	0.0995674
	A0A2I3BRT4	Eppk1	Cluster -7	0.998982	0.000883806	0.200426
	G5E866	Sf3b1	Cluster -7	0.0681825	0.125207	0.20372
	D3Z061	Uba6	Cluster -7	0.748504	0.00372375	0.213395
	A0A3Q4EBK4	Bin1	Cluster -7	0.258932	0.024486	0.220023
	P51863	Atp6v0d1	Cluster -8	0.969856	0.171378	0.00344125
	P11930	Nudt19	Cluster -8	0.0923737	0.348726	0.00624159		Cluster -8
	Q9R1R8	Rdh11	Cluster -8	0.338546	0.210756	0.00680323		No significant GO term
	Q8VDG7	Pafah2	Cluster -8	0.416844	0.718692	0.00843383
	P35576	G6pc	Cluster -8	0.485767	0.837175	0.0138362
	Q8JZU2	Slc25a1	Cluster -8	0.29848	0.529003	0.0208612
	S4R2P7	Atg7	Cluster -8	0.131746	0.915401	0.0263451
	Q9R0N0	Galk1	Cluster -8	0.627165	0.659165	0.040698
	Q9CQN1	Trap1	Cluster -8	0.113251	0.859854	0.0524471
	Q8BIG7	Comtd1	Cluster -8	0.701228	0.935141	0.0563652
	Q9CYV5	Tmem135	Cluster -8	0.444719	0.973356	0.0662286
	Q64514-2	Tpp2	Cluster -8	0.76441	0.810786	0.0672042
	Q8BMS4	Coq3	Cluster -8	0.743163	0.768475	0.126231
	Q9CXR1	Dhrs7	Cluster -9	0.346174	0.836192	0.0382118		Cluster -9
	O89051	Itm2b	Cluster -9	0.902599	0.186566	0.0616001		No significant GO term
	Q91ZJ5	Ugp2	Cluster -9	0.326108	0.645117	0.0619899
	A2AQN4	Acss2	Cluster -9	0.912979	0.695459	0.0792645
	Q8BWY3	Etf1	Cluster -9	0.425949	0.961826	0.135485
	Q6NXL1	Sec24d	Cluster -9	0.95928	0.451988	0.14289
	D3Z3S1	Preb	Cluster -9	0.27582	0.786726	0.150287
	G3XA66	Mtx1	Cluster -9	0.400544	0.450841	0.205541
	Q9QZQ8-2	H2afy	Cluster -9	0.574237	0.356453	0.297542
	O35129	Phb2	Cluster -10	0.0681638	0.0197314	0.000208276
	Q9D6Y9	Gbe1	Cluster -10	0.253278	0.0113595	0.00022887		Cluster -10
	Q14DH7	Acss3	Cluster -10	0.864806	0.18455	0.000883814		Term	Bonferroni p-value	Proteins
	O55137	Acot1	Cluster -10	0.960613	0.146332	0.000997164		GO:0006629~lipid metabolic process	1.19606e-06	Ehhadh, Cyp2c37, Acot1, Hacd3, Fasn, Rdh16, Acaca, Acot2, Elovl5, Apob, Ptpn11, Acss3
	Q9CQ54	Ndufc2	Cluster -10	0.258096	0.0264753	0.001066		GO:0006631~fatty acid metabolic process	0.000153015	Ehhadh, Acot1, Hacd3, Fasn, Acaca, Acot2, Elovl5
	Q3UVK0	Ermp1	Cluster -10	0.787094	0.303743	0.00204019		GO:0006633~fatty acid biosynthetic process	0.00151817	Hacd3, Fasn, Acaca, Elovl5, Abcd3
	Q9QYR7-2	Acot3	Cluster -10	0.949653	0.0535598	0.00232275
	Q8BGH2	Samm50	Cluster -10	0.235139	0.0925385	0.00562879
	Q791V5	Mtch2	Cluster -10	0.885679	0.392372	0.00571725
	Q9QYR9	Acot2	Cluster -10	0.657988	0.202565	0.00695067
	P35235	Ptpn11	Cluster -10	0.54044	0.0866132	0.00777245
	Q99L20	Gstt3	Cluster -10	0.701996	0.215019	0.00893094
	P00405	Mtco2	Cluster -10	0.669563	0.355876	0.011704
	A0A1B0GSU0	Aldh16a1	Cluster -10	0.965241	0.644968	0.0127186
	P19096	Fasn	Cluster -10	0.972151	0.50833	0.0134833
	Q9QXX4	Slc25a13	Cluster -10	0.973802	0.384321	0.0154894
	Q9QZD8	Slc25a10	Cluster -10	0.773685	0.389356	0.0175232
	O54909	Rdh16	Cluster -10	0.463875	0.0676067	0.017618
	Q9Z0K8	Vnn1	Cluster -10	0.743305	0.0520398	0.019469
	A0A286YDI8	Sec24c	Cluster -10	0.962519	0.763338	0.0197987
	E9Q1Y3	Apob	Cluster -10	0.835737	0.213682	0.0202424
	Q78IK4	Apool	Cluster -10	0.896989	0.395268	0.0215685
	Q9QXS1	Plec	Cluster -10	0.632711	0.0543161	0.0224949
	Q8BHI7	Elovl5	Cluster -10	0.472148	0.153607	0.0263499
	Q9CQN6	Tmem14c	Cluster -10	0.903694	0.427775	0.0285503
	Q8CAQ8-2	Immt	Cluster -10	0.753771	0.582871	0.0290733
	P55096	Abcd3	Cluster -10	0.883569	0.46631	0.0318919
	Q8BTS0	Ddx5	Cluster -10	0.99278	0.819787	0.041824
	Q8K2C9	Hacd3	Cluster -10	0.993333	0.647972	0.0422088
	Q9DBM2	Ehhadh	Cluster -10	0.851021	0.243867	0.0438381
	Q5SWU9	Acaca	Cluster -10	0.57521	0.149014	0.053004
	Q68FG2	Sptbn2	Cluster -10	0.968941	0.255062	0.0637452
	Q64133	Maoa	Cluster -10	0.903905	0.222744	0.0648326
	P56654	Cyp2c37	Cluster -10	0.920078	0.204084	0.0681739
	P16045	Lgals1	Cluster -11	0.0124458	0.00074309	0.00287775
	A0A0R4J0N9	Mtus1	Cluster -11	0.213023	0.0186402	0.0185908		Cluster -11
	P43883	Plin2	Cluster -11	0.0704149	0.526922	0.0562636		No significant GO term
	Q91XD6	Vps36	Cluster -11	0.170531	0.125479	0.0625571
	Q8VCB3	Gys2	Cluster -11	0.0191018	0.532676	0.132437
	Q5YD48-2	A1cf	Cluster -11	0.160495	0.516543	0.139445
	Q6A0A9	FAM120A	Cluster -11	0.298152	0.0214877	0.141411
	Q8BVZ1-2	Plin5	Cluster -11	0.148336	0.121682	0.157973
	E9PZ16	Hspg2	Cluster -11	0.0297519	0.123861	0.549514
	Q8BGG9	Acnat2	Cluster -11	0.0296751	0.225084	0.898229
