# Supplementary material for: Integrated liver and serum proteomics uncover sexual dimorphism and alteration of several immune response proteins in an aging Werner syndrome mouse model
Source: Aging (Albany NY). 2024 May 24;16(10):8417–45. doi: 10.18632/aging.205866 (PMC11164518; doi:10.18632/aging.205866)
Supplement: Supplementary Table 7 [file aging-16-205866-s008.xls]

## Sheet: Column header
Search Results: Results obtained after the search with MaxQuant software. LFQ normalisation is performed. Proteins identifed at 1% FDR
Quantifiable proteins: LFQ intensity for differentially expressed proteins (between male and female) with at least 2 quantifiable peptides
Samples :
Depleted serums of male or female mice.
Mice Groups (male and female) :
FWrn10m	Wrn helicase mutant females at ten months of age
FWrn4m	Wrn helicase mutant females at four months of age
FWT10m	Wild type females at ten months of age
FWT4m	Wild type females at four months of age
MWrn10m	Wrn helicase mutant males at ten months of age
MWrn4m	Wrn helicase mutant males at four months of age
MWT10m	Wild type males at ten months of age
MWT4m	Wild type males at four months of age
2 (Male or female) x 4 conditions - four biological replicates per condition
Injection: 1.25 microgram of each sample in LC-MS/MS Orbitrap Fusion
Run time: 120min (90 min gradient) - Detection-Dependent Acquisition with MS/MS Higher-energy collisional dissociation (HCD) detection IT
Bioinformatic analyses with MaxQuant/Andromeda
Database - Uniprot Mus musculus reference UP000000589 - 20200705_ 63807 entries-
Modifications: Fixed : Carbamidometyl (Cys), Variable : Oxidation(M), Acetyl (Prot N-term)
Quantification from 'LFQ Intensity' values ​at the protein level
Processing of raw data
Normalisation: performed by MaxQuant software (LFQ intensity)
Replacement of missing values: Missing values ​are replaced with a noise value corresponding to the 1st percentile of the values ​for each column (Red colored LFQ values in the table)
Quantifiable proteins: quantification only if at least four intensity values in the four replicates of one of the two conditions being compared were present and if two peptides or more were identified.
Column header	Description
ACCESSION	UniProt accession number for the leading protein of the group
PROTEIN_IDS	All the protein UniProt accession number for the group
GENE_NAMES	Gene names for the proteins of the group
PROTEIN_NAMES	Protein names for the group
FASTA_HEADERS	Fasta description for the group
PEPTIDES_RAZOR_UNIQUE	Number of razor and unique peptides identified and used for the quantification of the protein group
FWrn10m_2868	LFQ intensities, normalized and imputed.
FWrn10m_2869
FWrn10m_2870
FWrn10m_2871
FWrn4m_3065
FWrn4m_3066
FWrn4m_3082
FWrn4m_3083
FWT10m_2854
FWT10m_2856
FWT10m_2882
FWT10m_2883
FWT4m_3002
FWT4m_3003
FWT4m_3021
FWT4m_3022
MWrn10m_2970
MWrn10m_2971
MWrn10m_2972
MWrn10m_2973
MWrn4m_3026
MWrn4m_3029
MWrn4m_3123
MWrn4m_3124
MWT10m_3048
MWT10m_3049
MWT10m_3051
MWT10m_3052
MWT4m_3000
MWT4m_3001
MWT4m_3014
MWT4m_3017

## Sheet: Supplementary Table 7
Supplementary Table 7. List of quantified proteins in the serum of all males and females with at least two peptides.
Accession	ProteinIDs	GeneNames	ProteinNames	FastaHeaders	RazorUniquePeptides	FWrn10m_2868	FWrn10m_2869	FWrn10m_2870	FWrn10m_2871	FWrn4m_3065	FWrn4m_3066	FWrn4m_3082	FWrn4m_3083	FWT10m_2854	FWT10m_2856	FWT10m_2882	FWT10m_2883	FWT4m_3002	FWT4m_3003	FWT4m_3021	FWT4m_3022	MWrn10m_2970	MWrn10m_2971	MWrn10m_2972	MWrn10m_2973	MWrn4m_3026	MWrn4m_3029	MWrn4m_3123	MWrn4m_3124	MWT10m_3048	MWT10m_3049	MWT10m_3051	MWT10m_3052	MWT4m_3000	MWT4m_3001	MWT4m_3014	MWT4m_3017
Q5FW60	Q5FW60	Mup20	Major urinary protein 20	sp|Q5FW60|MUP20_MOUSE Major urinary protein 20 OS=Mus musculus OX=10090 GN=Mup20 PE=1 SV=1	6	591246	598482	406906	505140	298806	312961	447227	486744	519823	318575	409407	455300	345618	170466	190592	579184	24819000	20259000	31536000	22642000	29129000	24026000	40761000	30347000	36056000	18396000	33950000	42332000	35877000	27395000	19345000	22724000
Q00898	Q00898	Serpina1e	Alpha-1-antitrypsin 1-5	sp|Q00898|A1AT5_MOUSE Alpha-1-antitrypsin 1-5 OS=Mus musculus OX=10090 GN=Serpina1e PE=1 SV=1	14	410110000	27184000	55185000	57187000	639010000	4419500000	122940000	331640000	70505000	32390000	94911000	84230000	224720000	100210000	868010000	6368000000	3920900000	2521400000	3755000000	3615000000	11815000000	4571900000	15270000000	10927000000	20165000000	19124000000	12870000000	18786000000	10901000000	10975000000	9369200000	8148200000
P21765	P21765	Gpx5	Epididymal secretory glutathione peroxidase	sp|P21765|GPX5_MOUSE Epididymal secretory glutathione peroxidase OS=Mus musculus OX=10090 GN=Gpx5 PE=2 SV=3	5	591246	598482	406906	505140	298806	312961	447227	486744	519823	318575	409407	455300	345618	170466	190592	579184	4423700	3047200	2344200	4841500	6437300	3985900	3425500	4141800	1969800	3332200	4739100	1545300	4070900	5922600	6089100	2390000
D3YXF5	D3YXF5	C7	Complement component 7	tr|D3YXF5|D3YXF5_MOUSE Complement component 7 OS=Mus musculus OX=10090 GN=C7 PE=1 SV=2	28	76216000	60258000	66512000	61220000	56611000	80305000	65331000	54212000	67201000	50656000	66410000	57090000	69806000	67918000	55137000	93105000	493150000	438300000	388930000	434570000	673740000	555700000	415040000	351420000	327350000	394980000	497040000	311920000	579900000	553400000	593260000	624300000
Q3KQQ2	Q3KQQ2;P04939	Mup3	Major urinary protein 3	tr|Q3KQQ2|Q3KQQ2_MOUSE Major urinary protein 25 OS=Mus musculus OX=10090 GN=Mup3 PE=1 SV=1;sp|P04939|MUP3_MOUSE Major urinary protein 3 OS=Mus musculus OX=10090 GN=Mup3 PE=1 SV=1	10	11741000	25624000	30717000	19816000	34220000	7047200	23810000	22673000	33066000	27878000	28074000	20992000	47694000	19377000	32295000	11208000	146960000	105360000	121850000	118640000	198810000	148330000	161100000	140110000	146240000	36595000	155280000	96930000	184440000	129740000	106820000	104870000
Q91X70	Q91X70;E9Q6D8;Q8BRY4	C6	Complement component 6	tr|Q91X70|Q91X70_MOUSE Complement component 6 OS=Mus musculus OX=10090 GN=C6 PE=1 SV=1;tr|E9Q6D8|E9Q6D8_MOUSE Complement component C6 OS=Mus musculus OX=10090 GN=C6 PE=1 SV=2	30	49214000	36527000	34035000	30765000	30781000	40960000	29424000	26345000	24240000	29660000	38431000	18976000	37379000	45985000	31525000	36974000	110920000	98384000	105130000	104730000	207980000	119710000	241370000	145700000	202200000	154760000	198660000	208710000	219560000	168040000	154860000	160590000
A2CEK7	A2CEK7	Mup14	Major urinary protein 14	tr|A2CEK7|A2CEK7_MOUSE Major urinary protein 12 OS=Mus musculus OX=10090 GN=Mup14 PE=3 SV=1	18	27394000	75468000	67429000	56598000	168060000	25279000	85545000	69241000	81789000	72443000	75232000	69251000	103540000	96921000	72840000	16068000	194730000	147550000	165700000	184960000	333450000	240180000	435470000	335040000	497020000	39930000	395340000	382820000	385560000	203410000	175500000	249460000
Q8K182	Q8K182;A2A997;A2A998	C8a	Complement component C8 alpha chain	sp|Q8K182|CO8A_MOUSE Complement component C8 alpha chain OS=Mus musculus OX=10090 GN=C8a PE=1 SV=1;tr|A2A997|A2A997_MOUSE Complement component C8 alpha chain OS=Mus musculus OX=10090 GN=C8a PE=1 SV=1;tr|A2A998|A2A998_MOUSE Complement component C8 alpha cha	27	87421000	58602000	58698000	31713000	173610000	205540000	65334000	117760000	73234000	19824000	90351000	50657000	112730000	70577000	178770000	191490000	263680000	220640000	204390000	234940000	426220000	287990000	422670000	301100000	504820000	347240000	356130000	441670000	435580000	407530000	346810000	378420000
Q8BH35	Q8BH35;Q8BH35-2	C8b	Complement component C8 beta chain	sp|Q8BH35|CO8B_MOUSE Complement component C8 beta chain OS=Mus musculus OX=10090 GN=C8b PE=1 SV=1;sp|Q8BH35-2|CO8B_MOUSE Isoform 2 of Complement component C8 beta chain OS=Mus musculus OX=10090 GN=C8b	26	166510000	100820000	107580000	56583000	311640000	352790000	118490000	195790000	116720000	40806000	146460000	90204000	202150000	121930000	269470000	317630000	430860000	359410000	350780000	398450000	712190000	462280000	712090000	535350000	849820000	571920000	614810000	724020000	722770000	648990000	606120000	612010000
Q8VCG4	Q8VCG4;Q9DAC2	C8g	Complement component C8 gamma chain	sp|Q8VCG4|CO8G_MOUSE Complement component C8 gamma chain OS=Mus musculus OX=10090 GN=C8g PE=1 SV=1;tr|Q9DAC2|Q9DAC2_MOUSE Complement component C8 gamma chain OS=Mus musculus OX=10090 GN=C8g PE=1 SV=1	11	108750000	76291000	70240000	41408000	193860000	235970000	74021000	126190000	89609000	33003000	106750000	55485000	134800000	84258000	191300000	197960000	295330000	242670000	224960000	241780000	458650000	314620000	420060000	319410000	553620000	385040000	427120000	458490000	458730000	441960000	412260000	399800000
Q01279	Q01279;Q9WVF5;Q5SVE7	Egfr	Epidermal growth factor receptor	sp|Q01279|EGFR_MOUSE Epidermal growth factor receptor OS=Mus musculus OX=10090 GN=Egfr PE=1 SV=1;tr|Q9WVF5|Q9WVF5_MOUSE Receptor protein-tyrosine kinase OS=Mus musculus OX=10090 GN=Egfr PE=1 SV=1	22	162160000	104600000	128730000	104300000	305160000	371700000	185350000	236920000	161400000	107000000	191610000	162430000	304230000	214570000	414880000	452980000	480740000	354910000	389330000	443170000	953790000	600960000	920470000	800970000	1014000000	655580000	765240000	789160000	979200000	885050000	781810000	710500000
Q61646	Q61646	Hp	Haptoglobin;Haptoglobin alpha chain;Haptoglobin beta chain	sp|Q61646|HPT_MOUSE Haptoglobin OS=Mus musculus OX=10090 GN=Hp PE=1 SV=1	24	200100000	4132600000	1187700000	104810000	865880000	134640000	383490000	581860000	58691000	815770000	2032100000	33733000	873840000	1496500000	70652000	45516000	2366100000	3602900000	2274900000	4688100000	341510000	454730000	2897700000	1454100000	8646800000	2432600000	2403300000	5177600000	1419700000	602950000	315960000	243610000
Q63880	Q63880;Q63880-2;Q8VCU1-2	Ces3a	Carboxylesterase 3A	sp|Q63880|EST3A_MOUSE Carboxylesterase 3A OS=Mus musculus OX=10090 GN=Ces3a PE=1 SV=2;sp|Q63880-2|EST3A_MOUSE Isoform 2 of Carboxylesterase 3A OS=Mus musculus OX=10090 GN=Ces3a	9	1698700	3578300	2468900	505140	6476800	3913400	3198100	3194000	3159800	3964600	2672800	4027400	4041100	3402400	5535500	3848200	13901000	13222000	8989000	10948000	9001500	10219000	12713000	8125100	10887000	5533500	8699400	6301600	8980600	11352000	7594400	9060600
P05366	P05366	Saa1	Serum amyloid A-1 protein	sp|P05366|SAA1_MOUSE Serum amyloid A-1 protein OS=Mus musculus OX=10090 GN=Saa1 PE=1 SV=2	4	22990000	63421000	38569000	14174000	25573000	9564500	14013000	15523000	28720000	23889000	26438000	6987900	47282000	45848000	9140800	7276800	9196400	24161000	18954000	758750000	13915000	16348000	11832000	9780300	55847000	14021000	13354000	25671000	16588000	13042000	12381000	10609000
P06683	P06683;A0A0R4J032;H3BKN4	C9	Complement component C9	sp|P06683|CO9_MOUSE Complement component C9 OS=Mus musculus OX=10090 GN=C9 PE=1 SV=2;tr|A0A0R4J032|A0A0R4J032_MOUSE Complement component C9 OS=Mus musculus OX=10090 GN=C9 PE=1 SV=1	26	263640000	187660000	140780000	110930000	131060000	167510000	98143000	100170000	131030000	104100000	105890000	73980000	129810000	127770000	114290000	138600000	264380000	230610000	233470000	224570000	353280000	242820000	348200000	273590000	367470000	229390000	246050000	301540000	316930000	255720000	234620000	271340000
Q3UEL9	Q3UEL9;P61939;Q8BII9;B1AW62	Serpina7	Thyroxine-binding globulin	tr|Q3UEL9|Q3UEL9_MOUSE Thyroxine-binding globulin OS=Mus musculus OX=10090 GN=Serpina7 PE=1 SV=1;sp|P61939|THBG_MOUSE Thyroxine-binding globulin OS=Mus musculus OX=10090 GN=Serpina7 PE=2 SV=1;tr|Q8BII9|Q8BII9_MOUSE Thyroxine-binding globulin OS=Mus musculu	14	77360000	70665000	60459000	37247000	32335000	37712000	30177000	22704000	44911000	39810000	42686000	44028000	26214000	35902000	27173000	42457000	157700000	164460000	120620000	176640000	59362000	90607000	49177000	54335000	54663000	35355000	46094000	32936000	91012000	98898000	81634000	65516000
A0A0R4J0I1	A0A0R4J0I1	Serpina3k	Serine protease inhibitor A3K	tr|A0A0R4J0I1|A0A0R4J0I1_MOUSE Serine protease inhibitor A3K OS=Mus musculus OX=10090 GN=Serpina3k PE=1 SV=1	33	3887000000	4644200000	5629300000	3564000000	14586000000	7349600000	9387700000	10808000000	8380500000	4740000000	7798000000	7102700000	10348000000	10503000000	13949000000	8487400000	15416000000	13276000000	10927000000	12485000000	20615000000	16717000000	19764000000	15324000000	18836000000	11908000000	17167000000	15442000000	20811000000	19388000000	18872000000	16416000000
Q8QZR3	Q8QZR3;Q8QZR3-2;A0A1D5RLQ1	Ces2a	Pyrethroid hydrolase Ces2a	sp|Q8QZR3|EST2A_MOUSE Pyrethroid hydrolase Ces2a OS=Mus musculus OX=10090 GN=Ces2a PE=1 SV=1;sp|Q8QZR3-2|EST2A_MOUSE Isoform 2 of Pyrethroid hydrolase Ces2a OS=Mus musculus OX=10090 GN=Ces2a	5	3773400	3008500	4736300	4950300	4267300	4554000	4268700	3710800	4359500	2784900	4674100	1909300	3017500	3733500	3505800	6220700	10141000	10375000	6869200	10664000	9361800	9442600	7477100	7715100	5695100	4410900	5231500	3219000	10143000	9004800	8300800	8625200
Q8BK48	Q8BK48;Q149K3;F6Z9B9;Q08ED5;Q6AW46	Ces2e	Pyrethroid hydrolase Ces2e	sp|Q8BK48|EST2E_MOUSE Pyrethroid hydrolase Ces2e OS=Mus musculus OX=10090 GN=Ces2e PE=1 SV=1	19	27421000	32100000	35303000	34743000	35624000	28513000	29962000	27847000	29207000	25387000	37617000	22267000	26309000	27464000	31880000	20140000	79949000	85351000	65413000	89391000	66260000	80435000	62038000	52111000	31784000	15477000	40103000	24088000	63886000	65017000	57924000	56725000
P28665	P28665	Mug1	Murinoglobulin-1	sp|P28665|MUG1_MOUSE Murinoglobulin-1 OS=Mus musculus OX=10090 GN=Mug1 PE=1 SV=3	81	2485300000	3287800000	3570800000	2160400000	4852000000	2544200000	3785700000	3322600000	3335600000	1786300000	3918200000	2726800000	3891900000	3434600000	3908400000	1917300000	6655000000	6070000000	4760800000	5120800000	7196500000	6550700000	6887000000	5857900000	6300400000	3359600000	6720400000	5568600000	7134500000	7856800000	5626100000	5190400000
P08607	P08607;E9PUZ8;F6QLW4	C4bpa;C4bp	C4b-binding protein	sp|P08607|C4BPA_MOUSE C4b-binding protein OS=Mus musculus OX=10090 GN=C4bpa PE=1 SV=3;tr|E9PUZ8|E9PUZ8_MOUSE Complement component 4-binding protein (Fragment) OS=Mus musculus OX=10090 GN=C4bp PE=1 SV=1	12	303160000	194640000	184610000	128660000	237540000	322100000	207560000	173430000	169940000	145550000	183900000	119650000	176670000	232390000	197650000	336620000	367510000	443770000	345290000	345460000	332440000	318440000	457950000	379380000	433310000	278640000	374020000	392720000	396350000	310890000	302480000	316240000
P28666	P28666	Mug2	Murinoglobulin-2	sp|P28666|MUG2_MOUSE Murinoglobulin-2 OS=Mus musculus OX=10090 GN=Mug2 PE=1 SV=2	7	22225000	19314000	24416000	9184600	32535000	18557000	22145000	15484000	23283000	10516000	21852000	13420000	21850000	10544000	21938000	19351000	44038000	38352000	27271000	27128000	43953000	34547000	30400000	31740000	42162000	23581000	31429000	26510000	33319000	39352000	24589000	28238000
E9Q8B5	E9Q8B5;E9Q8B6;E9PUM5	Gm4788	Predicted gene 4788	tr|E9Q8B5|E9Q8B5_MOUSE Predicted gene 4788 OS=Mus musculus OX=10090 GN=Gm4788 PE=1 SV=1;tr|E9Q8B6|E9Q8B6_MOUSE Predicted gene 4788 OS=Mus musculus OX=10090 GN=Gm4788 PE=1 SV=1;tr|E9PUM5|E9PUM5_MOUSE Predicted gene 4788 OS=Mus musculus OX=10090 GN=Gm4788 PE	27	64051000	51709000	56877000	44822000	45541000	47503000	36643000	40720000	49576000	44295000	27954000	19364000	47671000	46110000	41198000	47899000	83978000	82173000	64103000	60139000	86118000	62405000	85139000	57065000	96499000	55866000	77630000	72683000	85959000	79250000	68371000	70544000
P05208	P05208	Cela2a	Chymotrypsin-like elastase family member 2A	sp|P05208|CEL2A_MOUSE Chymotrypsin-like elastase family member 2A OS=Mus musculus OX=10090 GN=Cela2a PE=1 SV=1	6	10838000	2485600	9054400	5017500	10340000	5978800	6963800	5037400	7528700	3175200	6238300	4482900	5327900	6053900	3874300	7853700	10155000	6802300	8755700	6827500	9567300	7656100	11206000	9310600	14465000	9480900	10766000	8163700	13749000	8715700	10795000	12438000
P06684	P06684;A0A0J9YUU3;CON__Q1A7A4	C5	Complement C5;Complement C5 beta chain;Complement C5 alpha chain;C5a anaphylatoxin;Complement C5 alpha chain	sp|P06684|CO5_MOUSE Complement C5 OS=Mus musculus OX=10090 GN=C5 PE=1 SV=2	80	550350000	552710000	540010000	392110000	518580000	483200000	422590000	396650000	420830000	363750000	436860000	366060000	461110000	436900000	428290000	445690000	730970000	659220000	576160000	620880000	698420000	620870000	676740000	561860000	954010000	682100000	638710000	677330000	703330000	630930000	591930000	561570000
Q9Z126	Q9Z126;A0A0J9YTR7	Pf4	Platelet factor 4	sp|Q9Z126|PLF4_MOUSE Platelet factor 4 OS=Mus musculus OX=10090 GN=Pf4 PE=1 SV=1;tr|A0A0J9YTR7|A0A0J9YTR7_MOUSE Platelet factor 4 OS=Mus musculus OX=10090 GN=Pf4 PE=1 SV=1	2	11007000	2327200	54762000	30238000	47349000	37341000	16179000	9399800	9593700	318575	324660000	78055000	24114000	47220000	32002000	39686000	34085000	31829000	244110000	60349000	5293100	210680000	16417000	9595000	6171500	2873600	96807000	63636000	95972000	129490000	21535000	4057600
P07309	P07309	Ttr	Transthyretin	sp|P07309|TTHY_MOUSE Transthyretin OS=Mus musculus OX=10090 GN=Ttr PE=1 SV=1	9	5135900000	7457100000	5588100000	5732400000	6066800000	1415100000	4906900000	4314000000	6211200000	5609600000	4088900000	5090600000	5849700000	7408000000	5436600000	2978000000	12445000000	11448000000	7134900000	8457700000	4231000000	7671200000	7095100000	6723400000	3927100000	2536700000	6365000000	4143200000	7212100000	6897400000	7759900000	6755300000
Q06890	Q06890;E9PUU2;E9PXG5;E9Q8Y5;E9Q9B8;E9Q2G2	Clu	Clusterin;Clusterin beta chain;Clusterin alpha chain	sp|Q06890|CLUS_MOUSE Clusterin OS=Mus musculus OX=10090 GN=Clu PE=1 SV=1;tr|E9PUU2|E9PUU2_MOUSE Clusterin (Fragment) OS=Mus musculus OX=10090 GN=Clu PE=1 SV=1;tr|E9PXG5|E9PXG5_MOUSE Clusterin (Fragment) OS=Mus musculus OX=10090 GN=Clu PE=1 SV=1;tr|E9Q8Y5|E	20	1136800000	1075600000	984560000	829110000	998890000	1042600000	834230000	687980000	918310000	841340000	869730000	632150000	1041600000	996100000	773230000	889290000	1326200000	1371400000	1088200000	1320100000	1393100000	1243200000	1226100000	982800000	1512400000	955570000	1179800000	1063100000	1306300000	1184500000	1044100000	1057100000
E9Q6I2	E9Q6I2;Q61730-2;Q61730;Q61730-3;G3UY13	Il1rap	Interleukin-1 receptor accessory protein	tr|E9Q6I2|E9Q6I2_MOUSE Interleukin-1 receptor accessory protein OS=Mus musculus OX=10090 GN=Il1rap PE=1 SV=1;sp|Q61730-2|IL1AP_MOUSE Isoform 2 of Interleukin-1 receptor accessory protein OS=Mus musculus OX=10090 GN=Il1rap;sp|Q61730|IL1AP_MOUSE Interleukin-	18	520270000	709930000	657250000	489810000	525180000	504330000	515940000	425160000	573560000	481620000	539340000	371920000	536020000	517330000	438280000	333500000	946610000	869260000	634130000	677090000	817110000	821230000	602470000	549580000	514770000	343090000	606540000	371260000	747680000	774190000	701840000	618220000
P98064	P98064	Masp1	Mannan-binding lectin serine protease 1;Mannan-binding lectin serine protease 1 heavy chain;Mannan-binding lectin serine protease 1 light chain	sp|P98064|MASP1_MOUSE Mannan-binding lectin serine protease 1 OS=Mus musculus OX=10090 GN=Masp1 PE=1 SV=2	6	16452000	31407000	32697000	25343000	24472000	23119000	30713000	33365000	25036000	22030000	22931000	18095000	25370000	28408000	25496000	19225000	27829000	34727000	27264000	35821000	36576000	31661000	46718000	28521000	35722000	20107000	36411000	26675000	35699000	31045000	37999000	32726000
Q02819	Q02819;A0A1C7CYU3;A0A1B0GR92;A0A1B0GR41;A0A1B0GT83;A0A1B0GS16	Nucb1	Nucleobindin-1	sp|Q02819|NUCB1_MOUSE Nucleobindin-1 OS=Mus musculus OX=10090 GN=Nucb1 PE=1 SV=2;tr|A0A1C7CYU3|A0A1C7CYU3_MOUSE Nucleobindin-1 OS=Mus musculus OX=10090 GN=Nucb1 PE=1 SV=1;tr|A0A1B0GR92|A0A1B0GR92_MOUSE Nucleobindin-1 (Fragment) OS=Mus musculus OX=10090 GN=	6	4974900	2726300	3938200	3013300	2648300	4889600	4981900	3590700	1126900	2652300	7947900	3631900	345618	170466	5150600	4978400	5599200	9432900	4641000	7609500	3653600	3703000	4224200	7015600	1832100	1200100	1426400	2226700	6674600	5521100	2737500	3945200
G5E843	G5E843;A0A338P6F7;O89026;A0A338P6U2;A0A2I3BQB9;E9Q6A0;Q19AB2;A0A2I3BR72;Q7TPD3-2;Q7TPD3	Robo1	Roundabout homolog 1	tr|G5E843|G5E843_MOUSE Roundabout homolog 1 OS=Mus musculus OX=10090 GN=Robo1 PE=1 SV=1;tr|A0A338P6F7|A0A338P6F7_MOUSE Roundabout homolog 1 (Fragment) OS=Mus musculus OX=10090 GN=Robo1 PE=1 SV=1;sp|O89026|ROBO1_MOUSE Roundabout homolog 1 OS=Mus musculus OX	4	160670000	162400000	176210000	162790000	28188000	31325000	176240000	177000000	178780000	145540000	213490000	185490000	185740000	153140000	212930000	144860000	140460000	153970000	193940000	210480000	221270000	184440000	210000000	206480000	203400000	173470000	201030000	191680000	214060000	189750000	195150000	215590000
H7BWY6	H7BWY6;Q00724;A0A494B9P3;A0A494B9T2	Rbp4	Retinol-binding protein 4	tr|H7BWY6|H7BWY6_MOUSE Plasma retinol-binding protein OS=Mus musculus OX=10090 GN=Rbp4 PE=1 SV=1;sp|Q00724|RET4_MOUSE Retinol-binding protein 4 OS=Mus musculus OX=10090 GN=Rbp4 PE=1 SV=2	11	438130000	826190000	750630000	443300000	659160000	251270000	608270000	401380000	643680000	586610000	700280000	453140000	660560000	967690000	462040000	235960000	1012900000	1168000000	779480000	720170000	720250000	755680000	689060000	632430000	539560000	213060000	787030000	442470000	762560000	607990000	674620000	676240000
P10404	P10404	Env1	MLV-related proviral Env polyprotein;Surface protein;Transmembrane protein	sp|P10404|ENV1_MOUSE MLV-related proviral Env polyprotein OS=Mus musculus OX=10090 PE=1 SV=3	7	17586000	10042000	15449000	14346000	9116900	18320000	10514000	8555900	11636000	9025800	21563000	6863400	9479700	11661000	9964700	14029000	18449000	19965000	12191000	18552000	16045000	13575000	13567000	9718700	18222000	13364000	16447000	22674000	13422000	10446000	11887000	12828000
Q91XL1	Q91XL1	Lrg1	Leucine-rich HEV glycoprotein	tr|Q91XL1|Q91XL1_MOUSE Leucine-rich HEV glycoprotein OS=Mus musculus OX=10090 GN=Lrg1 PE=1 SV=1	5	912170000	1628000000	1110100000	626090000	1341800000	1241300000	967430000	1037400000	703600000	824080000	1125700000	791050000	1246600000	1526200000	1052400000	730580000	1231600000	1449400000	1090900000	2679300000	1227700000	1228300000	1202100000	851620000	1946700000	1132900000	1152400000	977800000	1224800000	1173700000	926510000	832260000
A0A0A0MQA3	A0A0A0MQA3;P07758	Serpina1a	Alpha-1-antitrypsin 1-1	tr|A0A0A0MQA3|A0A0A0MQA3_MOUSE Alpha-1-antitrypsin 1-1 OS=Mus musculus OX=10090 GN=Serpina1a PE=1 SV=1;sp|P07758|A1AT1_MOUSE Alpha-1-antitrypsin 1-1 OS=Mus musculus OX=10090 GN=Serpina1a PE=1 SV=4	2	187000000	208160000	295470000	228830000	230150000	188660000	272970000	164150000	144280000	146850000	205870000	197920000	205400000	220210000	67315000	194820000	242450000	228880000	240720000	213700000	237090000	235010000	285240000	270800000	129660000	184180000	253410000	194610000	253010000	328100000	252710000	147290000
A0A0R4J0X5	A0A0R4J0X5;Q00896	Serpina1c	Alpha-1-antitrypsin 1-3	tr|A0A0R4J0X5|A0A0R4J0X5_MOUSE Alpha-1-antitrypsin 1-3 OS=Mus musculus OX=10090 GN=Serpina1c PE=1 SV=1;sp|Q00896|A1AT3_MOUSE Alpha-1-antitrypsin 1-3 OS=Mus musculus OX=10090 GN=Serpina1c PE=1 SV=2	16	20052000000	16538000000	18222000000	15728000000	19553000000	15666000000	18522000000	13901000000	17650000000	15164000000	16225000000	14204000000	17217000000	16253000000	13914000000	15832000000	23510000000	19360000000	17119000000	19238000000	23388000000	21573000000	20009000000	18770000000	19495000000	13920000000	17111000000	13811000000	23273000000	21544000000	19700000000	17773000000
E9Q9Z9	E9Q9Z9;P97399	Dspp	Dentin sialophosphoprotein;Dentin phosphoprotein;Dentin sialoprotein	tr|E9Q9Z9|E9Q9Z9_MOUSE Dentin sialophosphoprotein OS=Mus musculus OX=10090 GN=Dspp PE=1 SV=1;sp|P97399|DSPP_MOUSE Dentin sialophosphoprotein OS=Mus musculus OX=10090 GN=Dspp PE=1 SV=2	2	6261500	6461400	5176300	5916200	5828500	10551000	8176300	4870300	6457500	4606400	7700700	4444600	6990300	7815300	8184700	11681000	11509000	9728300	5466600	7369400	4761700	6899700	11874000	7204000	7849300	7420800	11766000	8073200	9145900	6525800	6152000	7173500
P27931	P27931;A0A0A6YX83	Il1r2	Interleukin-1 receptor type 2;Interleukin-1 receptor type 2, membrane form;Interleukin-1 receptor type 2, soluble form	sp|P27931|IL1R2_MOUSE Interleukin-1 receptor type 2 OS=Mus musculus OX=10090 GN=Il1r2 PE=1 SV=1;tr|A0A0A6YX83|A0A0A6YX83_MOUSE Interleukin-1 receptor type 2 (Fragment) OS=Mus musculus OX=10090 GN=Il1r2 PE=4 SV=1	2	10231000	3986200	5062200	4048600	7682900	10517000	7075500	4887600	5283800	4043100	5327400	4949200	5789700	5943200	6045400	7077000	8064800	7884000	3932100	5950700	9319300	7821800	7525600	6502300	6308600	6320200	8063000	4507500	6701500	8524600	8691100	6652200
B7ZCG3	B7ZCG3;P07743	Bpifa2	BPI fold-containing family A member 2	tr|B7ZCG3|B7ZCG3_MOUSE BPI fold-containing family A member 2 (Fragment) OS=Mus musculus OX=10090 GN=Bpifa2 PE=1 SV=1;sp|P07743|BPIA2_MOUSE BPI fold-containing family A member 2 OS=Mus musculus OX=10090 GN=Bpifa2 PE=1 SV=1	5	1857300	13064000	4235900	2484700	17538000	4703100	9145700	4202400	1722000	5526300	5095200	8255100	14707000	31771000	7362000	8502300	10322000	13046000	28368000	8355800	9527100	18245000	4963300	3907300	3238000	243892	21955000	4707800	6505000	17201000	5990100	3922000
P31532	P31532	Saa4	Serum amyloid A-4 protein	sp|P31532|SAA4_MOUSE Serum amyloid A-4 protein OS=Mus musculus OX=10090 GN=Saa4 PE=1 SV=2	9	351330000	800430000	654240000	536480000	544320000	338760000	578080000	622140000	638060000	576170000	485100000	315560000	722110000	608170000	515830000	273300000	693540000	802910000	632870000	955420000	701500000	527160000	573530000	325110000	603110000	226800000	550480000	596220000	748950000	483390000	650700000	668880000
P33587	P33587;A0A3Q4EBY5;A0A3Q4EC18	Proc	Vitamin K-dependent protein C;Vitamin K-dependent protein C light chain;Vitamin K-dependent protein C heavy chain;Activation peptide	sp|P33587|PROC_MOUSE Vitamin K-dependent protein C OS=Mus musculus OX=10090 GN=Proc PE=1 SV=2	16	45142000	46938000	42715000	34435000	43468000	39408000	35802000	31800000	32045000	34102000	34268000	32588000	36141000	40135000	34021000	36113000	54160000	54771000	38190000	45664000	47340000	38907000	41844000	36124000	56211000	34523000	35988000	36122000	44700000	37226000	34948000	35644000
Q4LDF6	Q4LDF6;Q61405;A0A668KLU9	Cfhr2	Complement factor H-related 2	tr|Q4LDF6|Q4LDF6_MOUSE Complement factor H-related 2 OS=Mus musculus OX=10090 GN=Cfhr2 PE=1 SV=1;tr|Q61405|Q61405_MOUSE Complement factor H-related 2 OS=Mus musculus OX=10090 GN=Cfhr2 PE=1 SV=1;tr|A0A668KLU9|A0A668KLU9_MOUSE Complement factor H-related 2 O	3	10935000	9924200	9435300	10542000	12248000	8392300	10004000	11523000	13901000	10897000	10939000	7592800	12691000	13644000	10385000	9780200	16209000	12129000	10828000	11205000	12925000	10602000	14150000	10284000	13377000	8210900	12758000	11686000	13033000	9295500	11883000	12834000
Q80YQ1	Q80YQ1;P35441;CON__Q28194;Q03350	Thbs1	Thrombospondin-1	tr|Q80YQ1|Q80YQ1_MOUSE Thrombospondin-1 OS=Mus musculus OX=10090 GN=Thbs1 PE=1 SV=1;sp|P35441|TSP1_MOUSE Thrombospondin-1 OS=Mus musculus OX=10090 GN=Thbs1 PE=1 SV=1	34	20823000	6917000	55017000	29898000	42507000	44248000	13544000	10644000	19626000	796080	400260000	191790000	60489000	68849000	40639000	68157000	49229000	31680000	269820000	64791000	5653100	287010000	13934000	32265000	8064600	5787300	68894000	75686000	101590000	136340000	29876000	6780900
Q8CG16	Q8CG16;Q8CFG9;Q3UZ09	C1ra;C1rb	Complement C1r-A subcomponent;Complement C1r-A subcomponent heavy chain;Complement C1r-A subcomponent light chain;Complement C1r-B subcomponent;Complement C1r-B subcomponent heavy chain;Complement C1r-B subcomponent light chain	sp|Q8CG16|C1RA_MOUSE Complement C1r-A subcomponent OS=Mus musculus OX=10090 GN=C1ra PE=1 SV=1;sp|Q8CFG9|C1RB_MOUSE Complement C1r-B subcomponent OS=Mus musculus OX=10090 GN=C1rb PE=2 SV=1	29	85691000	55399000	73682000	68531000	96953000	63016000	80861000	79783000	77075000	72824000	69268000	18836000	80716000	110210000	82721000	82560000	89007000	96436000	72146000	71778000	115740000	80394000	85782000	88199000	88349000	59764000	71006000	57212000	88072000	88767000	83881000	86019000
P16294	P16294	F9	Coagulation factor IX;Coagulation factor IXa light chain;Coagulation factor IXa heavy chain	sp|P16294|FA9_MOUSE Coagulation factor IX OS=Mus musculus OX=10090 GN=F9 PE=2 SV=3	11	43371000	48078000	33946000	39467000	40823000	34248000	32734000	33906000	33504000	42164000	34315000	27291000	36220000	39375000	31140000	34743000	49873000	51046000	41258000	46313000	43659000	36111000	41216000	34307000	46028000	27904000	41708000	33004000	41726000	35710000	40158000	35992000
Q9EQI5	Q9EQI5	Ppbp	Chemokine subfamily B Cys-X-Cys	tr|Q9EQI5|Q9EQI5_MOUSE Chemokine subfamily B Cys-X-Cys OS=Mus musculus OX=10090 GN=Ppbp PE=1 SV=1	5	19866000	6736500	86024000	57024000	83355000	70666000	21672000	17195000	23106000	498130	611230000	262010000	78764000	96133000	59128000	93271000	77607000	49864000	361050000	113430000	4591600	381350000	28187000	47459000	2835800	5482700	131860000	148700000	169420000	184940000	36030000	4117300
F8VQ07	F8VQ07;A0A0J9YV75	Albumin superfamily member 1	Albfm1	tr|F8VQ07|F8VQ07_MOUSE Albumin superfamily member 1 OS=Mus musculus OX=10090 GN=Albfm1 PE=1 SV=2	22	34499000	29594000	27639000	21200000	32112000	33537000	29818000	21784000	34696000	21688000	26846000	21470000	33298000	39021000	29336000	34739000	45723000	44318000	28570000	32122000	32970000	32768000	25238000	23731000	26997000	29587000	36409000	18281000	35751000	38584000	32773000	32482000
P39039	P39039;P39039-2	Mbl1	Mannose-binding protein A	sp|P39039|MBL1_MOUSE Mannose-binding protein A OS=Mus musculus OX=10090 GN=Mbl1 PE=1 SV=1;sp|P39039-2|MBL1_MOUSE Isoform 2 of Mannose-binding protein A OS=Mus musculus OX=10090 GN=Mbl1	8	178160000	341930000	284770000	206790000	262870000	157000000	213240000	188370000	245880000	220920000	219450000	125060000	252160000	226730000	213870000	148910000	312300000	324970000	238910000	303270000	256320000	250970000	232800000	177310000	244230000	119880000	223530000	191660000	271780000	230470000	214810000	213570000
P08071	P08071;A0A0G2JFM6;A0A0G2JDN0;A0A0G2JGN1;A0A0G2JEA3;A0A0G2JGX1	Ltf	Lactotransferrin	sp|P08071|TRFL_MOUSE Lactotransferrin OS=Mus musculus OX=10090 GN=Ltf PE=1 SV=4	19	13444000	11436000	11844000	5961800	10661000	8719500	8724800	7236200	8357600	8366900	3514700	7090800	11289000	7985400	8218100	9303600	10393000	8645500	8658500	10658000	8373200	8811300	10847000	8776400	18121000	9061900	10597000	10727000	9357000	9491200	6940200	5762700
P01898	P01898;Q4KN81;A7VMS6;E9Q0G4;G3UXE9;V9GXI4;A0A494B9G2;A0A0B4J1G3;A0A494B9G8;G3UZL7;V9GXR0;Q05A75;P06339	H2-Q10	H-2 class I histocompatibility antigen, Q10 alpha chain	sp|P01898|HA10_MOUSE H-2 class I histocompatibility antigen, Q10 alpha chain OS=Mus musculus OX=10090 GN=H2-Q10 PE=1 SV=3	15	967080000	1642700000	1448500000	1160000000	1013600000	610420000	1103500000	888280000	1210400000	1121500000	1186200000	868770000	1369500000	1221600000	1019400000	528420000	1401200000	1915000000	1241100000	1206200000	1230100000	1478300000	1102400000	1167400000	963050000	461870000	1206400000	849240000	1429000000	733470000	1241400000	1174000000
P09470	P09470;F6QCP8;P09470-2	Ace	Angiotensin-converting enzyme;Angiotensin-converting enzyme, soluble form	sp|P09470|ACE_MOUSE Angiotensin-converting enzyme OS=Mus musculus OX=10090 GN=Ace PE=1 SV=3;tr|F6QCP8|F6QCP8_MOUSE Angiotensin-converting enzyme (Fragment) OS=Mus musculus OX=10090 GN=Ace PE=1 SV=1	30	39437000	19866000	24252000	19922000	21959000	37747000	25753000	19734000	17325000	16819000	22308000	16800000	23083000	25093000	19981000	31914000	24767000	26404000	17413000	21979000	35268000	29018000	28959000	26669000	20700000	23481000	22774000	16969000	26385000	30899000	27752000	25455000
Q07079	Q07079	Igfbp5	Insulin-like growth factor-binding protein 5	sp|Q07079|IBP5_MOUSE Insulin-like growth factor-binding protein 5 OS=Mus musculus OX=10090 GN=Igfbp5 PE=1 SV=1	4	591246	6880500	4479700	7785300	9786300	2510700	3442600	4064100	10209000	7470000	6224500	2360800	7025000	5674400	7451500	5413800	6158900	9391400	5008800	6765400	6771600	3051400	6149000	2687000	5597900	4574800	7286000	5976500	8306000	7051500	5863600	4812700
P97333	P97333	Nrp1	Neuropilin-1	sp|P97333|NRP1_MOUSE Neuropilin-1 OS=Mus musculus OX=10090 GN=Nrp1 PE=1 SV=2	12	5505100	5179400	5716000	3346000	15279000	5345600	4002500	2818800	3403600	3982000	6512800	6198400	5038000	7591100	1519700	2440100	3700000	2858100	3011900	6284900	6789900	4743600	6001400	3964100	14434000	4804400	6825500	8156800	5395100	5366300	1739800	2897700
P09813	P09813	Apoa2	Apolipoprotein A-II;Proapolipoprotein A-II	sp|P09813|APOA2_MOUSE Apolipoprotein A-II OS=Mus musculus OX=10090 GN=Apoa2 PE=1 SV=2	9	3694700000	7975500000	8270300000	7647500000	6335900000	2924200000	8188000000	5897100000	7298200000	7280700000	8369200000	7050200000	7884600000	8068900000	6042000000	2819800000	7394400000	9026200000	7861700000	7512200000	7268800000	7643300000	6529700000	6986500000	4638100000	2121700000	6959900000	5599900000	7179100000	6472400000	9351600000	7096600000
Q91WP0	Q91WP0;Q91WP0-2	Masp2	Mannan-binding lectin serine protease 2;Mannan-binding lectin serine protease 2 A chain;Mannan-binding lectin serine protease 2 B chain	sp|Q91WP0|MASP2_MOUSE Mannan-binding lectin serine protease 2 OS=Mus musculus OX=10090 GN=Masp2 PE=1 SV=1	19	74596000	111980000	97950000	74253000	73140000	56114000	74188000	53546000	79690000	74246000	70951000	49382000	80888000	84828000	55359000	48092000	94766000	106240000	64120000	80877000	83811000	84648000	73592000	64623000	80614000	42472000	67897000	52363000	88836000	74832000	69315000	68988000
P13634	P13634;D3YYQ4	Ca1	Carbonic anhydrase 1	sp|P13634|CAH1_MOUSE Carbonic anhydrase 1 OS=Mus musculus OX=10090 GN=Ca1 PE=1 SV=4	9	15634000	2988000	13289000	14865000	10218000	19679000	36185000	8367800	7043100	1387100	37389000	39644000	16443000	11902000	3190300	23226000	40003000	24576000	17541000	9156800	13360000	41778000	14742000	41550000	1053400	1759900	5889200	10596000	13634000	24910000	6691800	2836100
P01029	P01029;CON__P01030;CON__ENSEMBL:ENSBTAP00000007350;G3UZS2	C4b	Complement C4-B;Complement C4 beta chain;Complement C4 alpha chain;C4a anaphylatoxin;Complement C4 gamma chain	sp|P01029|CO4B_MOUSE Complement C4-B OS=Mus musculus OX=10090 GN=C4b PE=1 SV=3	76	570230000	620610000	516330000	405280000	510680000	398120000	611850000	413410000	441630000	487070000	385450000	275810000	869650000	779110000	473200000	371590000	620920000	652360000	501160000	632400000	542340000	533260000	507040000	475150000	565250000	296160000	399770000	411220000	635110000	539880000	482220000	597800000
Q91Y47	Q91Y47	F11	Coagulation factor XI;Coagulation factor XIa heavy chain;Coagulation factor XIa light chain	sp|Q91Y47|FA11_MOUSE Coagulation factor XI OS=Mus musculus OX=10090 GN=F11 PE=2 SV=2	4	2403100	598482	406906	1951800	3412500	5076900	2961800	4076600	2852300	2109700	3966100	2952600	2458200	4316300	3925300	9718100	2127500	4208300	2211900	3214700	2663200	2272100	5160100	3861800	6634700	3284700	1133400	4395000	3019100	4519500	3240500	2743500
Q9JHH6	Q9JHH6	Cpb2	Carboxypeptidase B2	sp|Q9JHH6|CBPB2_MOUSE Carboxypeptidase B2 OS=Mus musculus OX=10090 GN=Cpb2 PE=1 SV=1	14	159880000	159210000	128500000	112010000	129680000	116920000	130310000	98144000	129080000	130460000	94480000	72726000	150840000	138590000	102320000	96643000	137650000	164260000	98574000	150380000	133960000	104150000	135440000	106470000	189860000	105770000	105870000	107110000	121540000	100540000	109770000	108020000
E9Q8I0	E9Q8I0;P06909;D6RGQ0;E9Q8H9;A0A0A6YWP4;A0A0A6YVP8	Cfh	Complement factor H	tr|E9Q8I0|E9Q8I0_MOUSE Complement factor H OS=Mus musculus OX=10090 GN=Cfh PE=1 SV=1;sp|P06909|CFAH_MOUSE Complement factor H OS=Mus musculus OX=10090 GN=Cfh PE=1 SV=2;tr|D6RGQ0|D6RGQ0_MOUSE Complement factor H OS=Mus musculus OX=10090 GN=Cfh PE=1 SV=1;tr|	63	1575000000	1782700000	1355200000	1051200000	1952000000	1514900000	1346000000	1534800000	1683100000	1181400000	1465000000	1131600000	1764000000	1794700000	1694900000	1486400000	1723600000	1817400000	1437000000	1594700000	1570300000	1380400000	1507000000	1180800000	1966200000	1361800000	1509200000	1520600000	1696000000	1607400000	1386400000	1374400000
P34928	P34928	Apoc1	Apolipoprotein C-I;Truncated apolipoprotein C-I	sp|P34928|APOC1_MOUSE Apolipoprotein C-I OS=Mus musculus OX=10090 GN=Apoc1 PE=1 SV=1	3	1593900000	3988700000	3278900000	3390800000	2193400000	1369300000	1889200000	2104800000	4076500000	3425000000	2334300000	1708500000	3356700000	3196200000	2385100000	1157300000	3913400000	3448000000	2971400000	3677100000	2918200000	2375900000	2410100000	2412100000	2380200000	773130000	2106700000	1254200000	2492300000	2113000000	3553000000	3111400000
P21180	P21180;B8JJN2;P21180-2;B8JJM9	C2	Complement C2;Complement C2b fragment;Complement C2a fragment	sp|P21180|CO2_MOUSE Complement C2 OS=Mus musculus OX=10090 GN=C2 PE=1 SV=2;tr|B8JJN2|B8JJN2_MOUSE C3/C5 convertase OS=Mus musculus OX=10090 GN=C2 PE=1 SV=1;sp|P21180-2|CO2_MOUSE Isoform Short of Complement C2 OS=Mus musculus OX=10090 GN=C2;tr|B8JJM9|B8JJM9	8	73223000	49487000	41196000	32936000	30576000	51659000	31458000	28627000	36209000	32310000	36478000	25665000	49045000	35107000	31049000	46739000	36524000	45428000	34416000	38278000	45729000	37972000	42241000	37741000	52956000	36020000	42321000	34017000	41526000	42430000	34112000	36048000
Q61704	Q61704;A0A2I3BRQ3;CON__Q0V8M9;A0A2I3BQM8	Itih3	Inter-alpha-trypsin inhibitor heavy chain H3	sp|Q61704|ITIH3_MOUSE Inter-alpha-trypsin inhibitor heavy chain H3 OS=Mus musculus OX=10090 GN=Itih3 PE=1 SV=3;tr|A0A2I3BRQ3|A0A2I3BRQ3_MOUSE Inter-alpha-trypsin inhibitor heavy chain H3 OS=Mus musculus OX=10090 GN=Itih3 PE=1 SV=1	28	288350000	214210000	198510000	122530000	254210000	244080000	160410000	174850000	145300000	118370000	204740000	156100000	157940000	178900000	196650000	267780000	191800000	195070000	162900000	225110000	138510000	124130000	156930000	127680000	447240000	392290000	143200000	236510000	174170000	171400000	117910000	104000000
Q91X72	Q91X72;A0A1B0GS57	Hpx	Hemopexin	sp|Q91X72|HEMO_MOUSE Hemopexin OS=Mus musculus OX=10090 GN=Hpx PE=1 SV=2	30	10955000000	10543000000	8913000000	5977700000	8317000000	10889000000	7477400000	7169600000	6876800000	6909400000	8564100000	5818400000	9479600000	9585800000	8219800000	9460100000	8627100000	9813200000	7249700000	8545800000	7368900000	7910900000	9457600000	8726600000	12876000000	8296700000	8632600000	10230000000	8941200000	7095900000	6419600000	6040500000
Q61406	Q61406;A0A0A6YXP6	Cfhr1	Complement factor H-related 1	tr|Q61406|Q61406_MOUSE Complement factor H-related 1 OS=Mus musculus OX=10090 GN=Cfhr1 PE=1 SV=1	7	44410000	43383000	37478000	27582000	35717000	30579000	27653000	25221000	42480000	34374000	29851000	26237000	38469000	35832000	29425000	27266000	43626000	45280000	33785000	31770000	39576000	33593000	30298000	26498000	35689000	26452000	32136000	29150000	33949000	32159000	32932000	33148000
Q8BHN3-2	Q8BHN3-2;Q8BHN3;Q8BHN3-3	Ganab	Neutral alpha-glucosidase AB	sp|Q8BHN3-2|GANAB_MOUSE Isoform 2 of Neutral alpha-glucosidase AB OS=Mus musculus OX=10090 GN=Ganab;sp|Q8BHN3|GANAB_MOUSE Neutral alpha-glucosidase AB OS=Mus musculus OX=10090 GN=Ganab PE=1 SV=1;sp|Q8BHN3-3|GANAB_MOUSE Isoform 3 of Neutral alpha-glucosidas	6	6157300	3959200	5605600	3509800	3860100	5379700	4805700	3416200	4994600	5114200	4039900	3125400	3303400	4058700	3853200	3833200	4678100	4157600	3201800	4126200	5090300	5619800	4777700	3807200	4258300	3205400	3622100	2676800	5925400	5613700	4642600	3778400
Q3V2T4-2	Q3V2T4-2;Q3V2T4;B7ZNU6;A0A087WRR2	Krtdap	Keratinocyte differentiation-associated protein	sp|Q3V2T4-2|KTDAP_MOUSE Isoform 2 of Keratinocyte differentiation-associated protein OS=Mus musculus OX=10090 GN=Krtdap;sp|Q3V2T4|KTDAP_MOUSE Keratinocyte differentiation-associated protein OS=Mus musculus OX=10090 GN=Krtdap PE=2 SV=1;tr|B7ZNU6|B7ZNU6_MOUS	2	5350000	9001300	11931000	6461300	7980600	3137400	7670000	3667100	5759300	3700200	7477100	4302700	7449300	4944300	3100600	4173100	8372500	7417300	3832100	6942000	9698000	9004900	7685100	7124900	3809800	2013300	5416500	4032400	6697600	3602600	4759000	5582300
E9PZC2	E9PZC2;Q91ZE6;E9PX29	Sptbn4	Spectrin beta, non-erythrocytic 4	tr|E9PZC2|E9PZC2_MOUSE Spectrin beta, non-erythrocytic 4 OS=Mus musculus OX=10090 GN=Sptbn4 PE=1 SV=1;tr|Q91ZE6|Q91ZE6_MOUSE Spectrin beta chain OS=Mus musculus OX=10090 GN=Sptbn4 PE=1 SV=1;tr|E9PX29|E9PX29_MOUSE Spectrin beta chain OS=Mus musculus OX=1009	2	34033000	36875000	36585000	40920000	45563000	20089000	36593000	22196000	31751000	14041000	19851000	27865000	41129000	3293200	21182000	25439000	27326000	35767000	25167000	27449000	46633000	43656000	27173000	35855000	22108000	16918000	15333000	22017000	52485000	11275000	18000000	27547000
P98064-2	P98064-2;A0A2R8VHR3	Masp1	Mannan-binding lectin serine protease 1;Mannan-binding lectin serine protease 1 heavy chain;Mannan-binding lectin serine protease 1 light chain	sp|P98064-2|MASP1_MOUSE Isoform 2 of Mannan-binding lectin serine protease 1 OS=Mus musculus OX=10090 GN=Masp1;tr|A0A2R8VHR3|A0A2R8VHR3_MOUSE Mannan-binding lectin serine protease 1 OS=Mus musculus OX=10090 GN=Masp1 PE=1 SV=1	19	49106000	51162000	51751000	45538000	57214000	43293000	49754000	46802000	48222000	42595000	40830000	30998000	41060000	45984000	39643000	39508000	52142000	52204000	35437000	45805000	54012000	41634000	50866000	40629000	54956000	34149000	41646000	34920000	50587000	42138000	46019000	41203000
P01887	P01887	B2m	Beta-2-microglobulin	sp|P01887|B2MG_MOUSE Beta-2-microglobulin OS=Mus musculus OX=10090 GN=B2m PE=1 SV=2	4	274110000	469770000	391980000	281600000	234940000	177650000	297940000	228130000	318780000	258530000	245060000	169250000	307160000	295570000	195460000	168990000	327710000	388510000	294070000	272460000	272780000	331750000	288070000	276650000	261540000	149910000	262910000	202180000	326510000	185160000	228920000	207530000
G3X8T9	G3X8T9;D3Z451;Q6P4P1	Serpina3n	Serine protease inhibitor A3N	tr|G3X8T9|G3X8T9_MOUSE Serine protease inhibitor A3N OS=Mus musculus OX=10090 GN=Serpina3n PE=1 SV=1	18	617380000	607460000	564460000	456840000	695840000	646890000	590950000	468810000	454250000	483180000	644970000	451590000	599950000	667310000	500410000	462130000	573440000	659700000	452630000	1034600000	507220000	540940000	473930000	452910000	902310000	532150000	461720000	432970000	480010000	439790000	438380000	392550000
Q3LFS7	Q3LFS7;Q3LFS6;Q3LFS9;Q3LFS5;Q925P3;P31809-4;P31809-3;P31809-2;P31809	Ceacam1	Carcinoembryonic antigen-related cell adhesion molecule 1	tr|Q3LFS7|Q3LFS7_MOUSE Carcinoembryonic antigen-related cell adhesion molecule 1 OS=Mus musculus OX=10090 GN=Ceacam1 PE=1 SV=1;tr|Q3LFS6|Q3LFS6_MOUSE Carcinoembryonic antigen-related cell adhesion molecule 1 OS=Mus musculus OX=10090 GN=Ceacam1 PE=1 SV=1;tr	2	6710000	7349200	9150400	5195400	7959700	5188900	5701800	4364500	9193800	3940500	7141900	4185300	8304000	7236100	5638700	7053500	9278300	9895900	5949300	6994200	7105800	7036600	5739400	6565800	4528200	4706000	5702000	5092800	8456200	4699500	5726200	5166700
P98086	P98086	C1qa	Complement C1q subcomponent subunit A	sp|P98086|C1QA_MOUSE Complement C1q subcomponent subunit A OS=Mus musculus OX=10090 GN=C1qa PE=1 SV=2	8	85031000	39759000	83560000	69464000	72396000	52786000	50089000	50754000	60417000	52121000	74758000	5230000	81374000	106280000	61158000	54559000	59031000	54094000	63057000	57160000	112580000	64793000	37591000	79783000	64509000	75433000	40581000	39479000	59049000	56121000	56469000	60159000
Q64726	Q64726	Azgp1	Zinc-alpha-2-glycoprotein	sp|Q64726|ZA2G_MOUSE Zinc-alpha-2-glycoprotein OS=Mus musculus OX=10090 GN=Azgp1 PE=1 SV=2	17	941170000	945510000	985960000	742340000	802240000	837300000	860920000	671730000	899900000	855820000	949690000	732980000	1070400000	955220000	775040000	753700000	981970000	1082800000	771800000	764110000	914220000	1008100000	811080000	750630000	911420000	576620000	854450000	670660000	983440000	895790000	776460000	706860000
B8JJN0	B8JJN0;F6VQX8;B8JJM5;P04186;F6XQ00;B8JJM6;H3BK95;F6W2T4;B8JJM3;F6ZCY7;F6WZA2	Gm20547;Cfb	Complement factor B;Complement factor B Ba fragment;Complement factor B Bb fragment	tr|B8JJN0|B8JJN0_MOUSE C3/C5 convertase OS=Mus musculus OX=10090 GN=Gm20547 PE=4 SV=1;tr|F6VQX8|F6VQX8_MOUSE C3/C5 convertase (Fragment) OS=Mus musculus OX=10090 GN=Gm20547 PE=4 SV=1;tr|B8JJM5|B8JJM5_MOUSE C3/C5 convertase OS=Mus musculus OX=10090 GN=Cfb P	61	834350000	1182800000	616760000	696750000	1101300000	839010000	927360000	828960000	998480000	783160000	992020000	693740000	1184200000	1111000000	914530000	901630000	1177700000	1249500000	888120000	949440000	942480000	893940000	828770000	760370000	979430000	555890000	819630000	717820000	962050000	947350000	755790000	816630000
E9Q6C2	E9Q6C2;Q8CG14;E0CZE7	C1s1;C1sa	Complement C1s-A subcomponent;Complement C1s-A subcomponent heavy chain;Complement C1s-A subcomponent light chain	tr|E9Q6C2|E9Q6C2_MOUSE Complement component 1, s subcomponent 1 OS=Mus musculus OX=10090 GN=C1s1 PE=1 SV=1;sp|Q8CG14|CS1A_MOUSE Complement C1s-A subcomponent OS=Mus musculus OX=10090 GN=C1sa PE=2 SV=2	26	196840000	152290000	167300000	127250000	157330000	132230000	147070000	132190000	153810000	143380000	134910000	60734000	156130000	177500000	144590000	135510000	171160000	184120000	127940000	139630000	184670000	140640000	138650000	143160000	157030000	102440000	126800000	97068000	144420000	140850000	130700000	122890000
Q00897	Q00897	Serpina1d	Alpha-1-antitrypsin 1-4	sp|Q00897|A1AT4_MOUSE Alpha-1-antitrypsin 1-4 OS=Mus musculus OX=10090 GN=Serpina1d PE=1 SV=1	33	23884000000	21569000000	23798000000	20681000000	20668000000	20240000000	22536000000	17633000000	21169000000	19508000000	19602000000	18450000000	20641000000	21201000000	16956000000	17472000000	24182000000	21113000000	17370000000	19589000000	24046000000	22974000000	20691000000	19852000000	16783000000	14210000000	19687000000	13136000000	22165000000	21603000000	20427000000	17699000000
Q02105	Q02105	C1qc	Complement C1q subcomponent subunit C	sp|Q02105|C1QC_MOUSE Complement C1q subcomponent subunit C OS=Mus musculus OX=10090 GN=C1qc PE=1 SV=2	5	48695000	17468000	39226000	40211000	42145000	28761000	27388000	28426000	34081000	31121000	39450000	3720800	43299000	69031000	40432000	32485000	32095000	29995000	39333000	31295000	52154000	36330000	20715000	45255000	30720000	32310000	24275000	24644000	34459000	34351000	38195000	39725000
P29788	P29788;Q8BP99	Vtn	Vitronectin	sp|P29788|VTNC_MOUSE Vitronectin OS=Mus musculus OX=10090 GN=Vtn PE=1 SV=2	13	1263900000	1060200000	1061300000	897330000	1240700000	1351100000	969160000	929170000	1013200000	857960000	1024300000	828230000	1175000000	1184900000	1091700000	1166000000	1192700000	1124600000	882710000	1147400000	1154700000	1026600000	953950000	807090000	1323300000	918110000	1011800000	901030000	1054000000	1147200000	954660000	904900000
Q00623	Q00623;A0A1L1STX7;CON__P15497	Apoa1	Apolipoprotein A-I;Proapolipoprotein A-I;Truncated apolipoprotein A-I	sp|Q00623|APOA1_MOUSE Apolipoprotein A-I OS=Mus musculus OX=10090 GN=Apoa1 PE=1 SV=2	32	26041000000	29305000000	29210000000	28625000000	33144000000	27115000000	33703000000	25605000000	24783000000	24041000000	30276000000	27408000000	36929000000	32307000000	30847000000	25160000000	25709000000	31503000000	25042000000	26776000000	31601000000	36521000000	26405000000	26059000000	22678000000	20394000000	30802000000	24152000000	34140000000	25072000000	30989000000	29708000000
G3X9D6	G3X9D6	Apon	Apolipoprotein N	tr|G3X9D6|G3X9D6_MOUSE Apolipoprotein N OS=Mus musculus OX=10090 GN=Apon PE=1 SV=1	6	308700000	361150000	351670000	285930000	279690000	172970000	300590000	163610000	248720000	252080000	258450000	195330000	281370000	121800000	200640000	171760000	309320000	378500000	194850000	340330000	262010000	307060000	230810000	259980000	252430000	127280000	153750000	133880000	306330000	155230000	203740000	164750000
P00687	P00687;D3YYQ5;CON__Q3MHH8;G3UXY7	Amy1	Alpha-amylase 1;Alpha-amylase	sp|P00687|AMY1_MOUSE Alpha-amylase 1 OS=Mus musculus OX=10090 GN=Amy1 PE=1 SV=2;tr|D3YYQ5|D3YYQ5_MOUSE Alpha-amylase (Fragment) OS=Mus musculus OX=10090 GN=Amy1 PE=1 SV=2	18	62436000	63957000	57652000	48584000	52747000	41328000	55951000	37015000	60531000	58727000	58661000	42764000	70686000	78589000	45966000	43491000	74640000	68357000	53086000	61700000	55291000	56845000	50195000	42580000	44179000	30595000	65685000	34940000	54989000	51603000	48142000	46575000
Q91X79	Q91X79;A0A2R8VK43	Cela1	Chymotrypsin-like elastase family member 1	sp|Q91X79|CELA1_MOUSE Chymotrypsin-like elastase family member 1 OS=Mus musculus OX=10090 GN=Cela1 PE=1 SV=1;tr|A0A2R8VK43|A0A2R8VK43_MOUSE Chymotrypsin-like elastase family member 1 (Fragment) OS=Mus musculus OX=10090 GN=Cela1 PE=1 SV=1	7	18442000	9177400	12846000	8274100	24537000	11544000	12653000	8180000	12901000	9176000	12134000	7424000	11147000	11613000	8833000	13905000	15702000	12164000	10431000	10409000	14537000	10982000	10766000	10083000	11902000	9904800	13303000	7354100	14159000	10822000	9777000	11480000
O35930	O35930	Gp1ba	Platelet glycoprotein Ib alpha chain	sp|O35930|GP1BA_MOUSE Platelet glycoprotein Ib alpha chain OS=Mus musculus OX=10090 GN=Gp1ba PE=1 SV=2	10	46649000	50863000	62331000	50489000	44610000	42882000	53511000	34117000	41902000	43071000	85030000	48018000	47708000	53131000	32432000	41021000	56803000	57201000	42331000	45707000	53072000	51426000	42178000	40221000	29188000	28755000	61873000	37698000	56158000	56413000	37951000	41942000
E9QPK1	E9QPK1;Q8R1U2	Cgref1	Cell growth regulator with EF hand domain protein 1	tr|E9QPK1|E9QPK1_MOUSE Cell growth regulator with EF hand domain protein 1 OS=Mus musculus OX=10090 GN=Cgref1 PE=1 SV=1;sp|Q8R1U2|CGRE1_MOUSE Cell growth regulator with EF hand domain protein 1 OS=Mus musculus OX=10090 GN=Cgref1 PE=1 SV=1	4	591246	43246000	39277000	41596000	260540000	34707000	32052000	37305000	55772000	30260000	30321000	36117000	37656000	76784000	51885000	46281000	45435000	51653000	61471000	41949000	37446000	51406000	79171000	40311000	25056000	20414000	59499000	99162000	37102000	35949000	82189000	41350000
Q01339	Q01339;I7HJR3;I7HPW5;CON__P17690	Apoh	Beta-2-glycoprotein 1	sp|Q01339|APOH_MOUSE Beta-2-glycoprotein 1 OS=Mus musculus OX=10090 GN=Apoh PE=1 SV=1	24	2276300000	2917000000	2544700000	2115700000	2776000000	2231900000	2373300000	2072800000	2148400000	2384100000	2188200000	1766700000	2909600000	2943900000	2376000000	2090900000	2972600000	3388100000	2398400000	2385300000	2366700000	2388100000	2020500000	1774300000	2191500000	1480200000	2387000000	1605900000	2365900000	2180900000	2091300000	2118100000
Q9CQW3	Q9CQW3;Q8CI01	Proz	Vitamin K-dependent protein Z	sp|Q9CQW3|PROZ_MOUSE Vitamin K-dependent protein Z OS=Mus musculus OX=10090 GN=Proz PE=1 SV=1;tr|Q8CI01|Q8CI01_MOUSE Proz protein OS=Mus musculus OX=10090 GN=Proz PE=1 SV=1	8	171610000	226450000	233420000	187510000	216900000	116260000	205330000	137980000	205780000	173420000	198020000	144050000	205510000	196930000	169550000	114850000	206140000	194290000	144100000	201390000	202110000	196540000	169540000	140640000	195800000	100580000	166280000	153380000	212600000	126810000	163780000	168120000
P14106	P14106	C1qb	Complement C1q subcomponent subunit B	sp|P14106|C1QB_MOUSE Complement C1q subcomponent subunit B OS=Mus musculus OX=10090 GN=C1qb PE=1 SV=2	5	55719000	21440000	45774000	43023000	53422000	35522000	32025000	31139000	39666000	36411000	47926000	3768000	53492000	75695000	45994000	37243000	38099000	31471000	40951000	32139000	60822000	45401000	23204000	52832000	35996000	40627000	32143000	24312000	41520000	40011000	39578000	41172000
P51910	P51910	Apod	Apolipoprotein D	sp|P51910|APOD_MOUSE Apolipoprotein D OS=Mus musculus OX=10090 GN=Apod PE=1 SV=1	5	68112000	57277000	81839000	64807000	99921000	67663000	102200000	80726000	73100000	66899000	94440000	61257000	106900000	95095000	87310000	59183000	67347000	80583000	62879000	68208000	81200000	94818000	74182000	74475000	60774000	39733000	103330000	56837000	94036000	63455000	89984000	81256000
Q64695	Q64695;A2AUV5	Procr	Endothelial protein C receptor	sp|Q64695|EPCR_MOUSE Endothelial protein C receptor OS=Mus musculus OX=10090 GN=Procr PE=1 SV=3;tr|A2AUV5|A2AUV5_MOUSE Endothelial protein C receptor (Fragment) OS=Mus musculus OX=10090 GN=Procr PE=1 SV=1	2	6266000	5767200	4338000	4756500	4798800	5865500	4198000	4744800	4465200	3859400	5198000	3614200	4127100	4588300	3666000	5470600	5375700	3670600	4023700	5516200	4665200	4087700	4201900	4639500	4184700	3656800	6051400	3390600	4168900	4962200	4119100	4336800
Q8CFX1	Q8CFX1;A2A7A7;A2A7A8	H6pd	GDH/6PGL endoplasmic bifunctional protein;Glucose 1-dehydrogenase;6-phosphogluconolactonase	sp|Q8CFX1|G6PE_MOUSE GDH/6PGL endoplasmic bifunctional protein OS=Mus musculus OX=10090 GN=H6pd PE=1 SV=2;tr|A2A7A7|A2A7A7_MOUSE GDH/6PGL endoplasmic bifunctional protein OS=Mus musculus OX=10090 GN=H6pd PE=1 SV=1	12	11869000	11859000	10300000	8725600	10510000	9487000	8521400	8309700	6843100	7698700	9112000	8862100	7915800	8808500	7130600	7464800	11916000	13046000	9446800	12877000	6896100	8936800	6591300	6307900	7287100	5975300	8357300	4980100	9068600	9026400	7311600	6042900
Q05020	Q05020	Apoc2	Apolipoprotein C-II	sp|Q05020|APOC2_MOUSE Apolipoprotein C-II OS=Mus musculus OX=10090 GN=Apoc2 PE=2 SV=1	2	99472000	232180000	270990000	264450000	200430000	84650000	267750000	197230000	171340000	158630000	196800000	126980000	254490000	52062000	163410000	109970000	199480000	237320000	140470000	214550000	154930000	207380000	212610000	199620000	90657000	39647000	125580000	86968000	172890000	132190000	228650000	200570000
P97298	P97298;Q5ND37;B7ZC25;F6S1M4;E9PWS2;CON__Q95121	Serpinf1	Pigment epithelium-derived factor	sp|P97298|PEDF_MOUSE Pigment epithelium-derived factor OS=Mus musculus OX=10090 GN=Serpinf1 PE=1 SV=2	17	126180000	153100000	134910000	118220000	106990000	102480000	117490000	84734000	98097000	123730000	114090000	95193000	135520000	137450000	102560000	85884000	131320000	168490000	101500000	114420000	115180000	108410000	112840000	99192000	94149000	56081000	128950000	65632000	114410000	100990000	91910000	87315000
Q99LJ1	Q99LJ1	Fuca1	Tissue alpha-L-fucosidase	sp|Q99LJ1|FUCO_MOUSE Tissue alpha-L-fucosidase OS=Mus musculus OX=10090 GN=Fuca1 PE=1 SV=1	3	4768500	3570300	4459800	3058500	3110800	3553100	2633100	1342200	3641500	4904000	4286500	3507200	3344700	3540200	2885200	2491200	4376000	5652600	2828200	1633900	3382100	2731500	3357900	2399900	3154800	2298000	4422400	2965600	3436000	2533500	2848300	2645700
Q61838	Q61838;D3YUI3	A2m	Alpha-2-macroglobulin;Alpha-2-macroglobulin 165 kDa subunit;Alpha-2-macroglobulin 35 kDa subunit	sp|Q61838|PZP_MOUSE Pregnancy zone protein OS=Mus musculus OX=10090 GN=Pzp PE=1 SV=3	97	24504000000	21630000000	22361000000	18876000000	20329000000	24465000000	20251000000	16165000000	21439000000	19487000000	20492000000	17913000000	23684000000	22229000000	17966000000	21394000000	23233000000	21371000000	17123000000	18496000000	20595000000	20911000000	17211000000	16765000000	18628000000	15753000000	19350000000	15008000000	21166000000	22215000000	19645000000	18051000000
P26262	P26262	Klkb1	Plasma kallikrein;Plasma kallikrein heavy chain;Plasma kallikrein light chain	sp|P26262|KLKB1_MOUSE Plasma kallikrein OS=Mus musculus OX=10090 GN=Klkb1 PE=1 SV=2	27	888370000	790040000	792990000	679160000	661960000	715570000	663620000	571700000	752200000	688920000	673450000	565890000	725810000	765310000	658010000	624680000	768000000	739980000	595990000	603640000	756730000	708810000	620860000	536310000	561380000	434650000	654700000	455790000	742980000	720870000	683660000	654750000
P21614	P21614;A0A0G2JGM6	Gc	Vitamin D-binding protein	sp|P21614|VTDB_MOUSE Vitamin D-binding protein OS=Mus musculus OX=10090 GN=Gc PE=1 SV=2	32	3925400000	4677400000	4228900000	3788600000	4282200000	3288600000	3830200000	3413600000	3939900000	4012100000	3654000000	2818500000	3684500000	4485100000	3867600000	3062400000	4050800000	4908200000	3320700000	3385600000	3583400000	3583000000	3634200000	2806000000	3125300000	1958500000	3785200000	2820000000	3680600000	3776100000	3648600000	3319200000
O35744	O35744;Q91Z98	Chil3	Chitinase-like protein 3	sp|O35744|CHIL3_MOUSE Chitinase-like protein 3 OS=Mus musculus OX=10090 GN=Chil3 PE=1 SV=2	4	6172800	5278800	7173700	2947700	9243100	4664800	7109200	5367500	4297100	3554500	3834900	4408600	7141100	7023100	4929400	6566100	4742800	5252800	4829900	3644700	4694800	5195400	5181600	6115400	8101600	4570300	6057800	5300500	4064900	5881900	4465800	3404500
D3Z7M4	D3Z7M4;E9Q138;E9PU89;Q4VJB9;Q8CAR0;P05017;P05017-2	Igf1	Insulin-like growth factor I	tr|D3Z7M4|D3Z7M4_MOUSE Insulin-like growth factor I (Fragment) OS=Mus musculus OX=10090 GN=Igf1 PE=1 SV=1;tr|E9Q138|E9Q138_MOUSE Insulin-like growth factor I OS=Mus musculus OX=10090 GN=Igf1 PE=1 SV=1;tr|E9PU89|E9PU89_MOUSE Insulin-like growth factor I OS=	3	29220000	31303000	24619000	32413000	27129000	24009000	24934000	20373000	26606000	30050000	21208000	16814000	22936000	27960000	25106000	25087000	26913000	28482000	22936000	19913000	33979000	19996000	25731000	13364000	25275000	13701000	28331000	19538000	25034000	24705000	20614000	23584000
Q07456	Q07456	Ambp	Protein AMBP;Alpha-1-microglobulin;Inter-alpha-trypsin inhibitor light chain;Trypstatin	sp|Q07456|AMBP_MOUSE Protein AMBP OS=Mus musculus OX=10090 GN=Ambp PE=1 SV=2	15	1581900000	1097800000	975900000	662010000	1017000000	1008900000	747150000	683530000	933260000	806760000	851320000	540810000	848870000	909360000	838350000	977370000	1066900000	967380000	705800000	781190000	807700000	657140000	644050000	487520000	1448500000	1136500000	777370000	743080000	887280000	824520000	631180000	573150000
P47877	P47877;D3YU40	Igfbp2	Insulin-like growth factor-binding protein 2	sp|P47877|IBP2_MOUSE Insulin-like growth factor-binding protein 2 OS=Mus musculus OX=10090 GN=Igfbp2 PE=2 SV=2;tr|D3YU40|D3YU40_MOUSE Insulin-like growth factor-binding protein 2 OS=Mus musculus OX=10090 GN=Igfbp2 PE=1 SV=1	5	8054800	6869100	8337700	10385000	15913000	14033000	11198000	7424100	7682000	7450100	12129000	12734000	16278000	17475000	11074000	10928000	6745000	8626400	7094400	5709200	12426000	12349000	10616000	9279100	11750000	10756000	19093000	8499600	9639800	11545000	8465000	8638000
Q08879	Q08879;CON__ENSEMBL:ENSBTAP00000016046	Fbln1	Fibulin-1	sp|Q08879|FBLN1_MOUSE Fibulin-1 OS=Mus musculus OX=10090 GN=Fbln1 PE=1 SV=2	14	33378000	18709000	22138000	18527000	21654000	26042000	18748000	17660000	24841000	25292000	21423000	9279900	14863000	18079000	18975000	24282000	18951000	17819000	12945000	15893000	27149000	16717000	23488000	17510000	21742000	15267000	16493000	14181000	22402000	21256000	19196000	19748000
Q9DBD0	Q9DBD0;D3YY36;F6W4D3;D3Z4X8	Ica;1300017J02Rik	Inhibitor of carbonic anhydrase	sp|Q9DBD0|ICA_MOUSE Inhibitor of carbonic anhydrase OS=Mus musculus OX=10090 GN=Ica PE=1 SV=1;tr|D3YY36|D3YY36_MOUSE RIKEN cDNA 1300017J02 gene OS=Mus musculus OX=10090 GN=1300017J02Rik PE=1 SV=1	43	823520000	757240000	816240000	667720000	711080000	730200000	678260000	598850000	715370000	699480000	739100000	612560000	736190000	808650000	671520000	688960000	816050000	776600000	587890000	619190000	732950000	695390000	654710000	551790000	628800000	434790000	614010000	518480000	769280000	700120000	641830000	569410000
P20029	P20029	Hspa5	78 kDa glucose-regulated protein	sp|P20029|BIP_MOUSE Endoplasmic reticulum chaperone BiP OS=Mus musculus OX=10090 GN=Hspa5 PE=1 SV=3	18	20774000	22156000	19476000	16368000	21436000	22154000	15980000	15193000	16864000	12770000	20045000	17515000	18497000	18432000	15652000	18116000	21575000	20831000	14973000	17627000	17546000	17901000	16178000	14760000	17867000	13694000	14692000	11334000	16867000	18674000	14629000	13168000
Q80YC5	Q80YC5;E9Q698	F12	Coagulation factor XII;Coagulation factor XIIa heavy chain;Coagulation factor XIIa light chain	sp|Q80YC5|FA12_MOUSE Coagulation factor XII OS=Mus musculus OX=10090 GN=F12 PE=1 SV=2	15	429530000	432020000	444430000	311850000	390050000	385840000	379130000	301960000	395870000	367600000	386440000	271990000	456010000	434430000	322340000	344360000	445500000	441940000	311170000	348390000	412220000	368300000	309580000	289830000	337390000	246180000	322100000	236710000	368120000	347510000	335680000	315010000
P26039	P26039	Tln1	Talin-1	sp|P26039|TLN1_MOUSE Talin-1 OS=Mus musculus OX=10090 GN=Tln1 PE=1 SV=2	4	1768500	2475000	3908100	2992300	1907800	2670200	3821500	4389400	1545100	1471000	3311900	1235600	1224600	2695400	1674500	2177900	2281500	3315100	2477600	2026600	2155300	2647900	2547500	1980400	1830400	743820	2450900	2019300	1832700	2795200	1613300	2113000
P30115	P30115	Gsta3	Glutathione S-transferase A3	sp|P30115|GSTA3_MOUSE Glutathione S-transferase A3 OS=Mus musculus OX=10090 GN=Gsta3 PE=1 SV=2	2	17179000	22602000	15824000	17600000	26195000	21826000	26097000	23211000	24677000	19435000	20731000	16866000	25788000	24229000	23814000	23616000	22861000	21878000	19119000	21685000	21218000	19886000	18479000	16396000	19990000	14940000	17427000	12719000	21264000	21928000	20325000	19640000
P07361	P07361;J3JRU4;Q63805	Orm2	Alpha-1-acid glycoprotein 2	sp|P07361|A1AG2_MOUSE Alpha-1-acid glycoprotein 2 OS=Mus musculus OX=10090 GN=Orm2 PE=1 SV=1	4	113420000	215030000	85644000	108690000	67700000	52056000	58662000	52391000	72820000	104210000	90245000	36951000	102590000	114610000	42921000	43638000	31518000	41684000	26830000	156350000	23951000	23631000	141880000	73409000	272230000	85185000	33986000	186000000	51182000	19087000	16086000	19594000
O88783	O88783	F5	Coagulation factor V;Coagulation factor V heavy chain;Coagulation factor V light chain	sp|O88783|FA5_MOUSE Coagulation factor V OS=Mus musculus OX=10090 GN=F5 PE=1 SV=1	57	70708000	68818000	40170000	46261000	44119000	41487000	37831000	29249000	37749000	46884000	37965000	32856000	39695000	42662000	33586000	38761000	50929000	58987000	37451000	40168000	47586000	36393000	36822000	28869000	46849000	35831000	35046000	26841000	33546000	28150000	31283000	32669000
P97290	P97290;A2ATR8;CON__P50448	Serping1	Plasma protease C1 inhibitor	sp|P97290|IC1_MOUSE Plasma protease C1 inhibitor OS=Mus musculus OX=10090 GN=Serping1 PE=1 SV=3;tr|A2ATR8|A2ATR8_MOUSE Plasma protease C1 inhibitor OS=Mus musculus OX=10090 GN=Serping1 PE=1 SV=1	20	1233100000	1014600000	964810000	808210000	932940000	1070400000	805560000	647610000	697790000	807050000	905430000	639750000	1077900000	920880000	869010000	950540000	1079300000	1115500000	801910000	1012100000	752120000	827220000	690430000	628950000	756250000	561010000	807070000	565410000	822270000	801520000	733400000	686110000
F8WIP8	F8WIP8;P10923;D3Z4N2;D3Z513	Spp1	Osteopontin	tr|F8WIP8|F8WIP8_MOUSE Osteopontin OS=Mus musculus OX=10090 GN=Spp1 PE=1 SV=1;sp|P10923|OSTP_MOUSE Osteopontin OS=Mus musculus OX=10090 GN=Spp1 PE=1 SV=1	5	3058200	3037400	3364700	1806500	2661000	2291500	2437100	1497000	4213500	2713900	2199200	5366400	2644400	3302100	1653300	2475000	2945800	2793800	2454000	3268400	1903700	2387800	2438700	2457900	2732400	2032100	3556900	1695000	2382300	2966700	1367800	1930000
Q8VCU2	Q8VCU2;O70362	Gpld1	Phosphatidylinositol-glycan-specific phospholipase D	tr|Q8VCU2|Q8VCU2_MOUSE Glycosyl-phosphatidylinositol-specific phospholipase D OS=Mus musculus OX=10090 GN=Gpld1 PE=1 SV=1;sp|O70362|PHLD_MOUSE Phosphatidylinositol-glycan-specific phospholipase D OS=Mus musculus OX=10090 GN=Gpld1 PE=1 SV=1	34	382340000	365960000	429270000	399210000	446420000	339440000	494000000	404620000	425880000	443300000	464990000	266140000	450770000	455280000	400250000	311290000	406610000	412750000	276740000	318360000	475620000	382750000	373520000	315150000	388800000	223430000	393900000	279250000	403690000	360900000	365680000	316660000
P47878	P47878	Igfbp3	Insulin-like growth factor-binding protein 3	sp|P47878|IBP3_MOUSE Insulin-like growth factor-binding protein 3 OS=Mus musculus OX=10090 GN=Igfbp3 PE=2 SV=2	7	16164000	11794000	10113000	12176000	17484000	12593000	11518000	12311000	12613000	12731000	11392000	9284100	10675000	15189000	11808000	16238000	14491000	13371000	10823000	11936000	13866000	9643800	12004000	7262100	8797300	7203400	11314000	7916900	12933000	13790000	10687000	11788000
P52480-2	P52480-2;A0A1L1SU37;A0A1L1SQV8;A0A1L1SSN6;A0A1L1STV8;A0A1L1SUV0;A0A1L1ST52;A0A1L1SVH2	Pkm	Pyruvate kinase PKM	sp|P52480-2|KPYM_MOUSE Isoform M1 of Pyruvate kinase PKM OS=Mus musculus OX=10090 GN=Pkm	25	68722000	42496000	49203000	35182000	47631000	63802000	45088000	33980000	40437000	31210000	45207000	33945000	44259000	45808000	34453000	48926000	37224000	31145000	27111000	29289000	39046000	40183000	29445000	32881000	77296000	77042000	32710000	34162000	34514000	37726000	32024000	25627000
Q9ESB3	Q9ESB3;A0A0R4J039;A0A338P6H8	Hrg	Histidine-rich glycoprotein	sp|Q9ESB3|HRG_MOUSE Histidine-rich glycoprotein OS=Mus musculus OX=10090 GN=Hrg PE=1 SV=2;tr|A0A0R4J039|A0A0R4J039_MOUSE Histidine-rich glycoprotein OS=Mus musculus OX=10090 GN=Hrg PE=1 SV=1	21	2056500000	1920800000	1978200000	1634700000	1524600000	1515800000	1892000000	1218900000	1657600000	1702900000	1842000000	1307300000	1674300000	1936200000	1266500000	1282300000	1696200000	1974400000	1261800000	1459600000	1602000000	1496100000	1394900000	1284100000	1648800000	1021100000	1440200000	1058200000	1554400000	1568000000	1337000000	1143300000
Q60963	Q60963;E9Q330;E9Q6J0;E9Q4T5	Pla2g7	Platelet-activating factor acetylhydrolase	sp|Q60963|PAFA_MOUSE Platelet-activating factor acetylhydrolase OS=Mus musculus OX=10090 GN=Pla2g7 PE=1 SV=2;tr|E9Q330|E9Q330_MOUSE 1-alkyl-2-acetylglycerophosphocholine esterase (Fragment) OS=Mus musculus OX=10090 GN=Pla2g7 PE=1 SV=1	12	42977000	32113000	29972000	27129000	30868000	28946000	32913000	24919000	24511000	18946000	29116000	12865000	33496000	11789000	22274000	35379000	29559000	28192000	16030000	24672000	32293000	28225000	25406000	20913000	30596000	24352000	18749000	16380000	24882000	21855000	20530000	17547000
Q61171	Q61171;D3Z4A4	Prdx2	Peroxiredoxin-2	sp|Q61171|PRDX2_MOUSE Peroxiredoxin-2 OS=Mus musculus OX=10090 GN=Prdx2 PE=1 SV=3;tr|D3Z4A4|D3Z4A4_MOUSE Peroxiredoxin-2 (Fragment) OS=Mus musculus OX=10090 GN=Prdx2 PE=1 SV=8	8	28063000	3240600	21232000	19064000	16265000	36306000	45233000	16209000	9152900	3904500	53142000	60134000	29867000	20336000	10115000	35965000	51135000	29596000	16286000	10883000	15660000	58670000	17549000	58079000	3076500	1890300	9276100	15061000	18964000	30359000	12771000	3944900
P14847	P14847	Crp	C-reactive protein	sp|P14847|CRP_MOUSE C-reactive protein OS=Mus musculus OX=10090 GN=Crp PE=1 SV=2	8	348640000	391560000	405750000	399830000	408860000	332920000	467690000	391280000	442870000	365440000	465910000	298500000	389470000	464160000	378150000	271300000	374160000	373740000	295010000	357550000	360080000	336140000	305860000	333180000	330340000	157450000	347060000	250290000	394820000	425290000	393560000	337870000
Q03734	Q03734	Serpina3m	Serine protease inhibitor A3M	sp|Q03734|SPA3M_MOUSE Serine protease inhibitor A3M OS=Mus musculus OX=10090 GN=Serpina3m PE=1 SV=2	14	311550000	506350000	470780000	398090000	518790000	312590000	607570000	478670000	349630000	487960000	239080000	184230000	449750000	501330000	399680000	277760000	439700000	535830000	327580000	505860000	341910000	345970000	338130000	282250000	417350000	175640000	335400000	239690000	359670000	315310000	352250000	287040000
P15327	P15327;D3Z223;D3YUE8	Bpgm	Bisphosphoglycerate mutase;Phosphoglycerate mutase	sp|P15327|PMGE_MOUSE Bisphosphoglycerate mutase OS=Mus musculus OX=10090 GN=Bpgm PE=1 SV=2;tr|D3Z223|D3Z223_MOUSE Phosphoglycerate mutase (Fragment) OS=Mus musculus OX=10090 GN=Bpgm PE=1 SV=1	3	11650000	819800	4583800	4875200	4765900	12591000	21149000	2103400	2530800	495020	17065000	15179000	11661000	170466	1071300	18133000	20552000	10005000	4280400	2721100	4335900	21013000	4682800	24700000	538910	357650	987530	942740	7288700	5423900	1746400	1408500
O88968	O88968	Tcn2	Transcobalamin-2	sp|O88968|TCO2_MOUSE Transcobalamin-2 OS=Mus musculus OX=10090 GN=Tcn2 PE=1 SV=1	19	115750000	92006000	91051000	85254000	96201000	94787000	87040000	68125000	77006000	85820000	99033000	73030000	109120000	105590000	74442000	94377000	102130000	102230000	66953000	81634000	87852000	77929000	76276000	66847000	75002000	62617000	87341000	54593000	86253000	78443000	74544000	66878000
P22599	P22599;D3YZL0	Serpina1b	Alpha-1-antitrypsin 1-2	sp|P22599|A1AT2_MOUSE Alpha-1-antitrypsin 1-2 OS=Mus musculus OX=10090 GN=Serpina1b PE=1 SV=2	15	7356700000	7627400000	7824900000	7546100000	7093900000	6601400000	7752400000	6370000000	7385700000	7368300000	7307500000	7079600000	7147500000	8205300000	5776700000	5712100000	7688400000	7239700000	6098400000	6835300000	6760800000	6902100000	5737500000	5845600000	5051300000	4139600000	6144700000	4328000000	6177400000	6396600000	6478200000	6146200000
Q9CPN9	Q9CPN9	2210010C04Rik	RIKEN cDNA 2210010C04 gene	tr|Q9CPN9|Q9CPN9_MOUSE RIKEN cDNA 2210010C04 gene OS=Mus musculus OX=10090 GN=2210010C04Rik PE=1 SV=1	4	24779000	28783000	23292000	15777000	69000000	30506000	22801000	20299000	24502000	23828000	23724000	14979000	21148000	26396000	23821000	16005000	29744000	19010000	17967000	22566000	22912000	22871000	21359000	23973000	30657000	10392000	32915000	13501000	23027000	17613000	27904000	14264000
A0A0R4IZZ5	A0A0R4IZZ5;P70194	Clec4f	C-type lectin domain family 4 member F	tr|A0A0R4IZZ5|A0A0R4IZZ5_MOUSE C-type lectin domain family 4 member F OS=Mus musculus OX=10090 GN=Clec4f PE=1 SV=1;sp|P70194|CLC4F_MOUSE C-type lectin domain family 4 member F OS=Mus musculus OX=10090 GN=Clec4f PE=1 SV=1	5	591246	4609300	7144600	4002600	5629800	2957000	3859200	3548700	3307000	4315100	5634300	3039000	7449900	7601100	4085100	2963600	4204000	5272400	4113600	2943700	3975600	5011500	4719900	4187800	3501500	1429800	4589600	2869300	3852400	3150000	4110800	2574100
Q91VB8	Q91VB8;P01942;A7M7S6;P06467	haemaglobin alpha 2;Hba	Hemoglobin subunit alpha	tr|Q91VB8|Q91VB8_MOUSE Alpha globin 1 OS=Mus musculus OX=10090 GN=Hba-a1 PE=1 SV=1;sp|P01942|HBA_MOUSE Hemoglobin subunit alpha OS=Mus musculus OX=10090 GN=Hba PE=1 SV=2	13	4974300000	1127900000	3666500000	3542100000	2996500000	6883200000	8092100000	2717400000	1708500000	933540000	8245900000	8755900000	4905000000	3151400000	1561800000	6715900000	8603900000	4901200000	3408000000	1921100000	3050300000	8385500000	3236000000	9011200000	576360000	471610000	1671700000	3083800000	3373000000	5166400000	2033500000	880040000
Q9CQF9	Q9CQF9;F7CIP8;D3Z275;A0A0N4SWD3	Pcyox1	Prenylcysteine oxidase	sp|Q9CQF9|PCYOX_MOUSE Prenylcysteine oxidase OS=Mus musculus OX=10090 GN=Pcyox1 PE=1 SV=1	14	17316000	22858000	21403000	21218000	18679000	13881000	16730000	11737000	18183000	15990000	18893000	13767000	20903000	19843000	14570000	15567000	20798000	23932000	16235000	20361000	17523000	16961000	12512000	12311000	11852000	8081100	15339000	7201300	15716000	12178000	15171000	13832000
A0A2I3BRQ1	A0A2I3BRQ1;A0A2I3BQE1;A2AS37	AI182371	Expressed sequence AI182371	tr|A0A2I3BRQ1|A0A2I3BRQ1_MOUSE Expressed sequence AI182371 OS=Mus musculus OX=10090 GN=AI182371 PE=1 SV=1;tr|A0A2I3BQE1|A0A2I3BQE1_MOUSE Expressed sequence AI182371 OS=Mus musculus OX=10090 GN=AI182371 PE=1 SV=1;tr|A2AS37|A2AS37_MOUSE Expressed sequence AI	12	64490000	71814000	80343000	65714000	60310000	48382000	58191000	44625000	59534000	60458000	60148000	56082000	44132000	50746000	56207000	42594000	57578000	65772000	49133000	65278000	52476000	47098000	52735000	50604000	46459000	21829000	43323000	32386000	57141000	46450000	48242000	49626000
Q9R0E2	Q9R0E2;A8Y5E6;F6WNR1	Plod1	Procollagen-lysine,2-oxoglutarate 5-dioxygenase 1	sp|Q9R0E2|PLOD1_MOUSE Procollagen-lysine,2-oxoglutarate 5-dioxygenase 1 OS=Mus musculus OX=10090 GN=Plod1 PE=1 SV=1	8	11167000	6696800	5583000	4441100	6121600	7164000	5681300	4642800	4027400	4934800	6229100	3165500	3321300	3454900	3606500	5660000	6558000	5865400	4020000	5702700	5454700	4561500	4372700	3219900	4236500	3747100	3620700	2583300	4422900	5284900	4842600	4150700
Q08879-2	Q08879-2	Fbln1	Fibulin-1	sp|Q08879-2|FBLN1_MOUSE Isoform C of Fibulin-1 OS=Mus musculus OX=10090 GN=Fbln1	5	23481000	11406000	12821000	9751100	13945000	14325000	9960400	8821700	15146000	15315000	9375400	3621900	7564800	7319600	13980000	10000000	10315000	9956200	7247300	8620100	16851000	8834500	11105000	7352200	11480000	8292200	10502000	5831100	11101000	10311000	9771600	10347000
A0A087WSN6	A0A087WSN6;A0A087WR50;B9EHT6;P11276;Q3UHL6;B7ZNJ1;A0A087WS56;A0A087WS99;Q4KL80;A0A087WQW8;A0A087WSU6;A0A087WQE0	Fn1	Fibronectin;Anastellin	tr|A0A087WSN6|A0A087WSN6_MOUSE Fibronectin OS=Mus musculus OX=10090 GN=Fn1 PE=1 SV=1;tr|A0A087WR50|A0A087WR50_MOUSE Fibronectin OS=Mus musculus OX=10090 GN=Fn1 PE=1 SV=1;tr|B9EHT6|B9EHT6_MOUSE Fibronectin OS=Mus musculus OX=10090 GN=Fn1 PE=1 SV=1;sp|P11276	94	1161700000	1227700000	671420000	1019600000	1129800000	420760000	1662100000	1316400000	1268300000	2013700000	67416000	57030000	661700000	453910000	578120000	219050000	1053000000	1281500000	236410000	578940000	1566700000	30737000	873910000	496620000	1564400000	857480000	552710000	345940000	499560000	236780000	428660000	1154300000
Q9Z2L6	Q9Z2L6	Minpp1	Multiple inositol polyphosphate phosphatase 1	sp|Q9Z2L6|MINP1_MOUSE Multiple inositol polyphosphate phosphatase 1 OS=Mus musculus OX=10090 GN=Minpp1 PE=1 SV=3	6	14423000	10388000	9917900	8406600	8318700	7464500	6442000	7589800	6980000	7469200	8887500	7616000	7341500	9804600	8229900	8803400	9580800	9787800	8205800	7201300	6834100	9784800	7315100	5758000	5657600	4540600	8713500	4693800	7508200	7723400	6964500	6236600
P30412	P30412	Ppic	Peptidyl-prolyl cis-trans isomerase C	sp|P30412|PPIC_MOUSE Peptidyl-prolyl cis-trans isomerase C OS=Mus musculus OX=10090 GN=Ppic PE=1 SV=1	2	4315400	5280600	4827900	3686100	6305900	6322600	4886500	3962400	4046900	3916600	7303900	3780400	6934800	7012600	6012200	5251800	4507300	4893100	4008200	4718500	6288200	5863100	4052700	3724800	2870800	2719800	5108900	2461800	4953100	6179400	3541200	4803500
P10852	P10852;P10852-2;A0A0U1RPK4;A0A0U1RP98;A0A0U1RPL8;A0A0U1RPQ7	Slc3a2	4F2 cell-surface antigen heavy chain	sp|P10852|4F2_MOUSE 4F2 cell-surface antigen heavy chain OS=Mus musculus OX=10090 GN=Slc3a2 PE=1 SV=1;sp|P10852-2|4F2_MOUSE Isoform 2 of 4F2 cell-surface antigen heavy chain OS=Mus musculus OX=10090 GN=Slc3a2;tr|A0A0U1RPK4|A0A0U1RPK4_MOUSE 4F2 cell-surface	6	12501000	8788200	8822200	8259300	8001600	11994000	5437300	8240700	7707000	8704900	8175800	10447000	8155100	11173000	8983800	11204000	10088000	8778800	7799000	7880900	9819000	9134200	6655700	6920600	4645000	5636300	6566700	4623800	8267400	10018000	8344800	8163100
Q8R121	Q8R121;Q8R121-2;CON__ENSEMBL:ENSBTAP00000013050	Serpina10	Protein Z-dependent protease inhibitor	sp|Q8R121|ZPI_MOUSE Protein Z-dependent protease inhibitor OS=Mus musculus OX=10090 GN=Serpina10 PE=1 SV=1;sp|Q8R121-2|ZPI_MOUSE Isoform 2 of Protein Z-dependent protease inhibitor OS=Mus musculus OX=10090 GN=Serpina10	15	413220000	428680000	403380000	352790000	353750000	303440000	350800000	243120000	290110000	328640000	353940000	273430000	369180000	326020000	274160000	272270000	348610000	401800000	266590000	392850000	292880000	295680000	266600000	248430000	283930000	179470000	243850000	218240000	325860000	235830000	249140000	234610000
Q9R1E6	Q9R1E6;Q9R1E6-3;G3UXY9;Q9R1E6-2	Enpp2	Ectonucleotide pyrophosphatase/phosphodiesterase family member 2	sp|Q9R1E6|ENPP2_MOUSE Ectonucleotide pyrophosphatase/phosphodiesterase family member 2 OS=Mus musculus OX=10090 GN=Enpp2 PE=1 SV=3;sp|Q9R1E6-3|ENPP2_MOUSE Isoform 3 of Ectonucleotide pyrophosphatase/phosphodiesterase family member 2 OS=Mus musculus OX=1009	12	10762000	8209600	6861200	5679700	5630000	9428200	7029400	4524500	6543700	4022300	5542300	4694800	7142600	5493800	4920700	8022300	5684400	8129500	5025900	5892800	6756500	7190900	5323600	4224500	4354600	4877900	5643100	3287000	5706400	5288000	5549300	4853100
O35664-3	O35664-3;O35664-2;O35664;H3BJ04;F7BJH9;F6XX07	Ifnar2	Interferon alpha/beta receptor 2	sp|O35664-3|INAR2_MOUSE Isoform 3 of Interferon alpha/beta receptor 2 OS=Mus musculus OX=10090 GN=Ifnar2;sp|O35664-2|INAR2_MOUSE Isoform 2 of Interferon alpha/beta receptor 2 OS=Mus musculus OX=10090 GN=Ifnar2;sp|O35664|INAR2_MOUSE Interferon alpha/beta re	4	136130000	127170000	113030000	97960000	103180000	103120000	103700000	64980000	102680000	78798000	92245000	60706000	122600000	57975000	72450000	90489000	125900000	127480000	58718000	89249000	102600000	99797000	76332000	72846000	62118000	52433000	76400000	46066000	93549000	60325000	69393000	63931000
Q61805	Q61805;A2AC65;F6XKX9	Lbp	Lipopolysaccharide-binding protein	sp|Q61805|LBP_MOUSE Lipopolysaccharide-binding protein OS=Mus musculus OX=10090 GN=Lbp PE=1 SV=2	8	16187000	25641000	16591000	15197000	14946000	16094000	15636000	13693000	11875000	18918000	16713000	9365600	22891000	26567000	13994000	16027000	17944000	22447000	11793000	17920000	15483000	13772000	11118000	11654000	14384000	8269600	13626000	10283000	15476000	13797000	14770000	13029000
P49182	P49182;CON__ENSEMBL:ENSBTAP00000018574	Serpind1	Heparin cofactor 2	sp|P49182|HEP2_MOUSE Heparin cofactor 2 OS=Mus musculus OX=10090 GN=Serpind1 PE=1 SV=1	18	519640000	499050000	495520000	437510000	381050000	436840000	408360000	324180000	400280000	457910000	421240000	298080000	446410000	432190000	362540000	347930000	441160000	493070000	310870000	316020000	365980000	379830000	318730000	315640000	366420000	229550000	353800000	250990000	373880000	356220000	370790000	317850000
Q923D2	Q923D2;E9PZC3;E9PZC4;A0A0U1RPU7	Blvrb	Flavin reductase (NADPH)	sp|Q923D2|BLVRB_MOUSE Flavin reductase (NADPH) OS=Mus musculus OX=10090 GN=Blvrb PE=1 SV=3;tr|E9PZC3|E9PZC3_MOUSE Flavin reductase (NADPH) OS=Mus musculus OX=10090 GN=Blvrb PE=1 SV=1;tr|E9PZC4|E9PZC4_MOUSE Flavin reductase (NADPH) OS=Mus musculus OX=10090	9	9472600	1035400	6113800	6298300	4812800	13473000	27683000	4125800	2495700	233650	20805000	32379000	8716400	8234700	184220	18207000	21731000	14263000	5799200	2688200	4843800	24660000	5077700	29086000	328108	98817	2074500	4269500	7465500	12910000	1184000	155340
Q9QZU3	Q9QZU3;O08742	Gp5	Platelet glycoprotein V	tr|Q9QZU3|Q9QZU3_MOUSE Platelet glycoprotein V (Fragment) OS=Mus musculus OX=10090 GN=Gp5 PE=1 SV=1;sp|O08742|GPV_MOUSE Platelet glycoprotein V OS=Mus musculus OX=10090 GN=Gp5 PE=1 SV=1	11	13390000	5502700	23157000	14190000	23082000	22840000	7596400	4921000	6599200	808890	128990000	53605000	20937000	35808000	18166000	36967000	14170000	12252000	39065000	19673000	3523600	74428000	9742100	17568000	3304900	2859100	28631000	28292000	35873000	41563000	11460000	3884300
P70274	P70274;E0CX80;E0CZ76;E0CY03	Sepp1	Selenoprotein P	sp|P70274|SEPP1_MOUSE Selenoprotein P OS=Mus musculus OX=10090 GN=Selenop PE=1 SV=3;tr|E0CX80|E0CX80_MOUSE Selenoprotein P (Fragment) OS=Mus musculus OX=10090 GN=Selenop PE=1 SV=2	10	294740000	314910000	270400000	264150000	304930000	272920000	251930000	198350000	258700000	243670000	250210000	226810000	301720000	291110000	209930000	242460000	293120000	305970000	221780000	251750000	249190000	226520000	193070000	171140000	219740000	150750000	205020000	159620000	227580000	210370000	191110000	208190000
P46412	P46412;A0A1C7ZMZ5;A0A1C7ZMZ7	Gpx3	Glutathione peroxidase 3	sp|P46412|GPX3_MOUSE Glutathione peroxidase 3 OS=Mus musculus OX=10090 GN=Gpx3 PE=1 SV=2;tr|A0A1C7ZMZ5|A0A1C7ZMZ5_MOUSE Glutathione peroxidase (Fragment) OS=Mus musculus OX=10090 GN=Gpx3 PE=1 SV=1;tr|A0A1C7ZMZ7|A0A1C7ZMZ7_MOUSE Glutathione peroxidase 3 (Fr	8	1910000000	1033500000	1075100000	905330000	1216300000	1823900000	1366300000	1040700000	844830000	951750000	1276900000	934880000	1172000000	1231300000	988180000	1269600000	1192500000	1135200000	807080000	978200000	1125300000	1148700000	859260000	803050000	928720000	1096800000	892690000	608340000	1123700000	1215200000	998090000	850680000
A8DUK4	A8DUK4;E9Q223;P02088;P02089;CON__Q3SX09;CON__P02070	Hbbt1;Hbb-bs;Hbb-b1	Hemoglobin subunit beta-1	tr|A8DUK4|A8DUK4_MOUSE Beta-globin OS=Mus musculus OX=10090 GN=Hbb-bs PE=1 SV=1;tr|E9Q223|E9Q223_MOUSE Hemoglobin, beta adult s chain (Fragment) OS=Mus musculus OX=10090 GN=Hbb-bs PE=1 SV=1;sp|P02088|HBB1_MOUSE Hemoglobin subunit beta-1 OS=Mus musculus OX=	20	8266700000	1918800000	6163200000	5892900000	4642300000	12544000000	12940000000	4626800000	2922000000	1596200000	13522000000	16887000000	7627100000	5844800000	2844700000	10590000000	13228000000	7998000000	5276900000	3004900000	4777000000	15388000000	5074800000	15135000000	914110000	767270000	2749100000	4211400000	5312900000	9570200000	3373900000	1419500000
Q9QXC1	Q9QXC1;Q6YJU1;A0A338P7B8	Fetub	Fetuin-B	sp|Q9QXC1|FETUB_MOUSE Fetuin-B OS=Mus musculus OX=10090 GN=Fetub PE=1 SV=1;tr|Q6YJU1|Q6YJU1_MOUSE Fetuin-B OS=Mus musculus OX=10090 GN=Fetub PE=1 SV=1	20	1085500000	1009100000	1267000000	1029100000	1230300000	1177700000	1282500000	868170000	1230600000	951230000	1372000000	946380000	1344200000	1423600000	1210000000	1161800000	1099700000	1058000000	709200000	859370000	1064200000	1026400000	972490000	913520000	1081000000	783900000	1053000000	865910000	1017400000	1118300000	912310000	806900000
E9Q414	E9Q414;E9Q1Y3;E9Q4G4;F7A3M3;CON__ENSEMBL:ENSBTAP00000032840	Apob	Apolipoprotein B-100;Apolipoprotein B-48	sp|E9Q414|APOB_MOUSE Apolipoprotein B-100 OS=Mus musculus OX=10090 GN=Apob PE=1 SV=1;tr|E9Q1Y3|E9Q1Y3_MOUSE Apolipoprotein B-100 (Fragment) OS=Mus musculus OX=10090 GN=Apob PE=1 SV=1	195	304510000	287950000	234950000	185080000	374510000	376840000	231490000	179520000	236650000	279880000	217550000	116380000	255310000	336530000	219380000	399560000	282450000	236610000	184610000	357550000	242890000	193060000	201400000	158300000	234440000	256390000	227770000	126980000	179410000	257340000	191930000	160400000
P17047-3	P17047-3;P17047;P17047-2	Lamp2	Lysosome-associated membrane glycoprotein 2	sp|P17047-3|LAMP2_MOUSE Isoform LAMP-2C of Lysosome-associated membrane glycoprotein 2 OS=Mus musculus OX=10090 GN=Lamp2;sp|P17047|LAMP2_MOUSE Lysosome-associated membrane glycoprotein 2 OS=Mus musculus OX=10090 GN=Lamp2 PE=1 SV=2;sp|P17047-2|LAMP2_MOUSE I	3	26392000	23566000	28506000	22346000	25081000	20081000	23810000	15319000	18390000	19472000	22580000	17055000	23575000	21546000	12165000	19628000	25751000	26941000	16527000	20465000	19008000	25362000	16519000	14424000	10243000	11240000	15671000	10283000	19661000	21639000	16814000	9043600
Q9CZT5	Q9CZT5	Vasn	Vasorin	sp|Q9CZT5|VASN_MOUSE Vasorin OS=Mus musculus OX=10090 GN=Vasn PE=2 SV=2	7	5455100	4345600	4676100	4843800	4961700	6698700	6763200	3442000	3086400	2560900	3983200	4191900	6271700	6543000	4611900	6084600	4809600	5506500	3643300	3940500	4568900	4124700	5150100	4365400	2054100	3225300	4810700	3357500	4313500	3418400	3534900	3785400
Q60590	Q60590	Orm1	Alpha-1-acid glycoprotein 1	sp|Q60590|A1AG1_MOUSE Alpha-1-acid glycoprotein 1 OS=Mus musculus OX=10090 GN=Orm1 PE=1 SV=1	9	2008500000	2090100000	1811300000	1933400000	1350800000	1176200000	1796500000	1337600000	1678900000	1957300000	1910000000	1184400000	1988800000	2150600000	1320200000	1285900000	1255400000	1270800000	967250000	1455000000	1276800000	1102100000	1627200000	1781900000	2996500000	1094000000	1234400000	1836500000	1388300000	923380000	1098100000	890250000
P06728	P06728;CON__Q32PJ2	Apoa4	Apolipoprotein A-IV	sp|P06728|APOA4_MOUSE Apolipoprotein A-IV OS=Mus musculus OX=10090 GN=Apoa4 PE=1 SV=3	31	3878400000	3913600000	4561600000	4152200000	4258500000	4603300000	5195300000	3796500000	4989600000	3362800000	3757500000	2999900000	5090300000	5800900000	3681500000	3465700000	3914300000	4001200000	2545300000	2975300000	4021000000	3766700000	3256000000	3461300000	3203400000	2513700000	3910700000	2078400000	3697700000	3851700000	4604600000	3726600000
Q8BND5	Q8BND5;Q8BND5-2;Q8BND5-4	Qsox1	Sulfhydryl oxidase 1	sp|Q8BND5|QSOX1_MOUSE Sulfhydryl oxidase 1 OS=Mus musculus OX=10090 GN=Qsox1 PE=1 SV=1;sp|Q8BND5-2|QSOX1_MOUSE Isoform 2 of Sulfhydryl oxidase 1 OS=Mus musculus OX=10090 GN=Qsox1	35	272310000	310930000	229710000	230380000	312790000	240740000	241450000	181850000	205240000	252760000	282360000	177750000	287780000	342430000	213330000	215740000	252490000	263600000	177110000	270300000	234220000	195110000	206420000	169220000	210870000	135130000	213670000	155490000	228680000	190100000	198410000	184640000
P08226	P08226;A0A1B0GX15;G3UWN5;G3UZM8	Apoe	Apolipoprotein E	sp|P08226|APOE_MOUSE Apolipoprotein E OS=Mus musculus OX=10090 GN=Apoe PE=1 SV=2;tr|A0A1B0GX15|A0A1B0GX15_MOUSE Apolipoprotein E (Fragment) OS=Mus musculus OX=10090 GN=Apoe PE=1 SV=1;tr|G3UWN5|G3UWN5_MOUSE Apolipoprotein E (Fragment) OS=Mus musculus OX=100	15	1057700000	1801900000	1115200000	1434700000	1325200000	1678800000	1400100000	928410000	2146900000	1598200000	1187200000	875520000	1398000000	1903900000	962730000	1310700000	2166300000	1914300000	1024900000	1611600000	1229300000	907740000	896410000	931300000	1070400000	824760000	770420000	615370000	802820000	964960000	1349200000	1027900000
Q3U3V1	Q3U3V1;O88947;D3Z521;D3Z215	F10	Coagulation factor X;Factor X light chain;Factor X heavy chain;Activated factor Xa heavy chain	tr|Q3U3V1|Q3U3V1_MOUSE Coagulation factor X OS=Mus musculus OX=10090 GN=F10 PE=1 SV=1;sp|O88947|FA10_MOUSE Coagulation factor X OS=Mus musculus OX=10090 GN=F10 PE=1 SV=1	13	265930000	297380000	295310000	292620000	238780000	230400000	259670000	214590000	287390000	244810000	244300000	178910000	260970000	259860000	216030000	222750000	258160000	243860000	188090000	238440000	232290000	226620000	192270000	188790000	172910000	143290000	201260000	130550000	226470000	192510000	217910000	210390000
Q3V1J8	Q3V1J8;E9Q092;E9QM92;Q8K0D2-2;Q8K0D2;F7B276;E9Q0C5	Habp2	Hyaluronan-binding protein 2;Hyaluronan-binding protein 2 50 kDa heavy chain;Hyaluronan-binding protein 2 50 kDa heavy chain alternate form;Hyaluronan-binding protein 2 27 kDa light chain;Hyaluronan-binding protein 2 27 kDa light chain alternate form	tr|Q3V1J8|Q3V1J8_MOUSE Hyaluronan-binding protein 2 OS=Mus musculus OX=10090 GN=Habp2 PE=1 SV=1;tr|E9Q092|E9Q092_MOUSE Hyaluronan-binding protein 2 OS=Mus musculus OX=10090 GN=Habp2 PE=1 SV=1;tr|E9QM92|E9QM92_MOUSE Hyaluronan-binding protein 2 OS=Mus muscu	15	33985000	25783000	25140000	24436000	25418000	29382000	20084000	17159000	27275000	25363000	23704000	14686000	23595000	21995000	23352000	22183000	23341000	21833000	16494000	20179000	19309000	20448000	18324000	17721000	18468000	16707000	21409000	16437000	21534000	18332000	19873000	20556000
Q61702	Q61702;F8WJ05;CON__Q0VCM5	Itih1	Inter-alpha-trypsin inhibitor heavy chain H1	sp|Q61702|ITIH1_MOUSE Inter-alpha-trypsin inhibitor heavy chain H1 OS=Mus musculus OX=10090 GN=Itih1 PE=1 SV=2;tr|F8WJ05|F8WJ05_MOUSE Inter-alpha-trypsin inhibitor heavy chain H1 OS=Mus musculus OX=10090 GN=Itih1 PE=1 SV=1	39	1048800000	888700000	835800000	630820000	750100000	662560000	548370000	543640000	670000000	657200000	684200000	605400000	707860000	720650000	645050000	724140000	853530000	836230000	597900000	649690000	528380000	526520000	458050000	413580000	646690000	541350000	533250000	452770000	617630000	603450000	473540000	426840000
Q8BPB5	Q8BPB5;F6ZFS0	Efemp1	EGF-containing fibulin-like extracellular matrix protein 1	sp|Q8BPB5|FBLN3_MOUSE EGF-containing fibulin-like extracellular matrix protein 1 OS=Mus musculus OX=10090 GN=Efemp1 PE=1 SV=1	19	47276000	36706000	40723000	38920000	34169000	47489000	28266000	26309000	44917000	33218000	30944000	20460000	37282000	33747000	31680000	43000000	34580000	32191000	25061000	30804000	35910000	26062000	27084000	23165000	28781000	31711000	32757000	23283000	31847000	26891000	24890000	30158000
P55065	P55065;A2A5K2;A2A5K4;A2A5K3	Pltp	Phospholipid transfer protein	sp|P55065|PLTP_MOUSE Phospholipid transfer protein OS=Mus musculus OX=10090 GN=Pltp PE=1 SV=1;tr|A2A5K2|A2A5K2_MOUSE Phospholipid transfer protein OS=Mus musculus OX=10090 GN=Pltp PE=1 SV=1	19	112010000	149620000	116490000	115570000	100490000	81348000	118560000	101380000	115900000	87229000	105840000	86960000	141600000	114460000	103610000	89388000	96458000	118330000	69095000	100300000	99591000	93409000	84923000	83960000	85367000	61013000	89123000	57128000	84295000	71454000	117000000	92458000
Q923X1	Q923X1;A0A0G2JGY1	Eltd1	EGF, latrophilin seven transmembrane domain-containing protein 1	sp|Q923X1|AGRL4_MOUSE Adhesion G protein-coupled receptor L4 OS=Mus musculus OX=10090 GN=Adgrl4 PE=2 SV=3;tr|A0A0G2JGY1|A0A0G2JGY1_MOUSE Adhesion G protein-coupled receptor L4 (Fragment) OS=Mus musculus OX=10090 GN=Adgrl4 PE=4 SV=1	2	7174000	6704200	5971000	3526500	3822900	5570600	5453800	3251000	3109500	4159300	5126700	3324900	6409500	6076600	3779900	5315200	4769400	5196000	3947400	4889800	4113900	4178500	4038000	3218300	3210000	3747500	3323100	4154300	3873200	4623100	3002200	3131700
P26928	P26928;E0CXN0	Mst1	Hepatocyte growth factor-like protein;Hepatocyte growth factor-like protein alpha chain;Hepatocyte growth factor-like protein beta chain	sp|P26928|HGFL_MOUSE Hepatocyte growth factor-like protein OS=Mus musculus OX=10090 GN=Mst1 PE=2 SV=2;tr|E0CXN0|E0CXN0_MOUSE Hepatocyte growth factor-like protein OS=Mus musculus OX=10090 GN=Mst1 PE=1 SV=1	19	66012000	64953000	58326000	43622000	51080000	54354000	44639000	40191000	52875000	44880000	44723000	33870000	59843000	60564000	41448000	44979000	49724000	46285000	35662000	39610000	46331000	39256000	46306000	34635000	45548000	34778000	39513000	31649000	43822000	40015000	40270000	34903000
E9PV24	E9PV24;E9PV24-2;CON__P02672	Fga	Fibrinogen alpha chain;Fibrinopeptide A;Fibrinogen alpha chain	sp|E9PV24|FIBA_MOUSE Fibrinogen alpha chain OS=Mus musculus OX=10090 GN=Fga PE=1 SV=1;sp|E9PV24-2|FIBA_MOUSE Isoform 2 of Fibrinogen alpha chain OS=Mus musculus OX=10090 GN=Fga	39	565040000	3600300000	15990000	496010000	5604300	10198000	395360000	1555200000	1965200000	4060800000	12411000	7611000	38409000	15840000	58951000	9294100	21495000	503610000	10187000	10268000	2481200000	8562700	60632000	6136700	2465300000	2122400000	8073900	8102300	16284000	13151000	100340000	2449100000
Q08761	Q08761;CON__P07224	Pros1	Vitamin K-dependent protein S	sp|Q08761|PROS_MOUSE Vitamin K-dependent protein S OS=Mus musculus OX=10090 GN=Pros1 PE=2 SV=1	13	46509000	34247000	39192000	34605000	36081000	40994000	32916000	26473000	31190000	29090000	43082000	30628000	33095000	34848000	29972000	31777000	33761000	33526000	28201000	31797000	30830000	33560000	25023000	23554000	27740000	22860000	26444000	21231000	27392000	26667000	27917000	24481000
A0A0R4J0I9	A0A0R4J0I9;Q91ZX7;Q3U5J2;D3Z5M3	Lrp1	Prolow-density lipoprotein receptor-related protein 1;Low-density lipoprotein receptor-related protein 1 85 kDa subunit;Low-density lipoprotein receptor-related protein 1 515 kDa subunit;Low-density lipoprotein receptor-related protein 1 intracellular domain	tr|A0A0R4J0I9|A0A0R4J0I9_MOUSE Prolow-density lipoprotein receptor-related protein 1 OS=Mus musculus OX=10090 GN=Lrp1 PE=1 SV=1;sp|Q91ZX7|LRP1_MOUSE Prolow-density lipoprotein receptor-related protein 1 OS=Mus musculus OX=10090 GN=Lrp1 PE=1 SV=1	20	18715000	13804000	13440000	12078000	14529000	16307000	14740000	11426000	13442000	12885000	11710000	11896000	12269000	12160000	12750000	14675000	13745000	15267000	9775700	10205000	14156000	11469000	10273000	10628000	8786600	7899500	9644900	7055500	12388000	12302000	11010000	9097900
Q8VCS0	Q8VCS0;Q8VCS0-2;A0A494BB01;A0A498WFR9;Q8VCS0-3;Q71S44;A0A494B9M1;CON__ENSEMBL:ENSBTAP00000016285	Pglyrp2	N-acetylmuramoyl-L-alanine amidase	sp|Q8VCS0|PGRP2_MOUSE N-acetylmuramoyl-L-alanine amidase OS=Mus musculus OX=10090 GN=Pglyrp2 PE=1 SV=1;sp|Q8VCS0-2|PGRP2_MOUSE Isoform 2 of N-acetylmuramoyl-L-alanine amidase OS=Mus musculus OX=10090 GN=Pglyrp2;tr|A0A494BB01|A0A494BB01_MOUSE N-acetylmuramo	19	441270000	229850000	234720000	195340000	178440000	298160000	219190000	142210000	173730000	198550000	215750000	152640000	210790000	241260000	160230000	273680000	200250000	214910000	161000000	166350000	206150000	194930000	178690000	167120000	170290000	179400000	196960000	164340000	176230000	152870000	174030000	144620000
P45700	P45700;A0A1W2P788;A0A1W2P6N0	Man1a1	Mannosyl-oligosaccharide 1,2-alpha-mannosidase IA	sp|P45700|MA1A1_MOUSE Mannosyl-oligosaccharide 1,2-alpha-mannosidase IA OS=Mus musculus OX=10090 GN=Man1a1 PE=1 SV=1;tr|A0A1W2P788|A0A1W2P788_MOUSE alpha-1,2-Mannosidase (Fragment) OS=Mus musculus OX=10090 GN=Man1a PE=1 SV=1;tr|A0A1W2P6N0|A0A1W2P6N0_MOUSE	16	31679000	31975000	32242000	29006000	23605000	27107000	29134000	20696000	22611000	27784000	29800000	22663000	25972000	31861000	22377000	23209000	30412000	28767000	21909000	25043000	23024000	26494000	20411000	20878000	16505000	11421000	21165000	13656000	23623000	21136000	20737000	19491000
Q61129	Q61129;A0A0G2JF07	Cfi	Complement factor I;Complement factor I heavy chain;Complement factor I light chain	sp|Q61129|CFAI_MOUSE Complement factor I OS=Mus musculus OX=10090 GN=Cfi PE=1 SV=3	30	1110100000	908540000	827920000	640030000	934720000	1041000000	782000000	699400000	844530000	694400000	776360000	596310000	919440000	861240000	761980000	924790000	919340000	829490000	649540000	602380000	758560000	702320000	626190000	548810000	740840000	673190000	589340000	510450000	699130000	658680000	504340000	555320000
A0A0R4J0M6	A0A0R4J0M6;A0A1Y7VKG6;Q3SXB8;Q3SXB8-2	Colec11	Collectin-11	tr|A0A0R4J0M6|A0A0R4J0M6_MOUSE Collectin-11 OS=Mus musculus OX=10090 GN=Colec11 PE=1 SV=1;tr|A0A1Y7VKG6|A0A1Y7VKG6_MOUSE Collectin-11 OS=Mus musculus OX=10090 GN=Colec11 PE=1 SV=1;sp|Q3SXB8|COL11_MOUSE Collectin-11 OS=Mus musculus OX=10090 GN=Colec11 PE=2	5	20806000	21397000	21676000	22856000	18087000	16044000	19452000	15423000	16619000	15543000	12923000	7258100	13505000	14802000	11543000	13085000	16752000	20094000	9167700	15003000	19804000	11830000	15096000	13183000	11889000	8987500	11276000	5615400	9979700	12799000	11797000	13705000
G3X8T3	G3X8T3;P16675;A2A5J9;A2A5J8	Ctsa	Carboxypeptidase;Lysosomal protective protein;Lysosomal protective protein 32 kDa chain;Lysosomal protective protein 20 kDa chain	tr|G3X8T3|G3X8T3_MOUSE Carboxypeptidase OS=Mus musculus OX=10090 GN=Ctsa PE=1 SV=1;sp|P16675|PPGB_MOUSE Lysosomal protective protein OS=Mus musculus OX=10090 GN=Ctsa PE=1 SV=1	11	25609000	20028000	19188000	20761000	17084000	19769000	17257000	14089000	15456000	20576000	19396000	15385000	16223000	19630000	16910000	21574000	17261000	15140000	12935000	15020000	17115000	14304000	13340000	13040000	16350000	11004000	17823000	12289000	14931000	16959000	16047000	13460000
F8VQL0	F8VQL0;P16056;F6X333	Met	Receptor protein-tyrosine kinase;Hepatocyte growth factor receptor	tr|F8VQL0|F8VQL0_MOUSE HGF/SF receptor OS=Mus musculus OX=10090 GN=Met PE=1 SV=1;sp|P16056|MET_MOUSE Hepatocyte growth factor receptor OS=Mus musculus OX=10090 GN=Met PE=1 SV=1	3	4017700	3342700	3106800	3125700	3310000	4132800	3445200	2384200	1851500	3739900	2897900	2778600	3762600	3825200	3463500	3733000	3144900	3872900	2620400	2596900	2386700	3276200	2095300	2044200	2417200	1660000	3523500	2163700	2436400	2319300	2878600	2493700
P21460	P21460;A2APX3	Cst3	Cystatin-C	sp|P21460|CYTC_MOUSE Cystatin-C OS=Mus musculus OX=10090 GN=Cst3 PE=1 SV=2;tr|A2APX3|A2APX3_MOUSE Cystatin-C (Fragment) OS=Mus musculus OX=10090 GN=Cst3 PE=1 SV=1	4	14872000	13480000	10088000	7796600	12436000	9002200	10190000	6064200	13957000	6138200	9135300	7090200	15551000	14193000	6794400	10004000	10837000	11231000	7984100	7453600	10360000	8893600	8039000	8967200	8647600	6340000	7373000	5577400	11638000	7138000	4540800	6962800
Q05909	Q05909;F8VQD7;D6RD11	Ptprg	Receptor-type tyrosine-protein phosphatase gamma;Protein-tyrosine-phosphatase	sp|Q05909|PTPRG_MOUSE Receptor-type tyrosine-protein phosphatase gamma OS=Mus musculus OX=10090 GN=Ptprg PE=1 SV=1;tr|F8VQD7|F8VQD7_MOUSE Protein-tyrosine-phosphatase OS=Mus musculus OX=10090 GN=Ptprg PE=1 SV=1	5	15635000	11045000	12407000	12684000	9842100	16177000	13253000	7558600	9690700	10343000	12487000	11344000	14401000	13248000	10355000	10871000	15033000	13969000	9811500	8197400	11104000	12860000	7792700	8472300	5562700	5018900	10691000	4957200	8435300	10724000	11477000	6951400
P12246	P12246	Apcs	Serum amyloid P-component	sp|P12246|SAMP_MOUSE Serum amyloid P-component OS=Mus musculus OX=10090 GN=Apcs PE=1 SV=2	5	113660000	98834000	121780000	83544000	157170000	153990000	109200000	117710000	97703000	83249000	74161000	108420000	118300000	118060000	157900000	187590000	63395000	73297000	47793000	179220000	25867000	20469000	47206000	37315000	536610000	172890000	34030000	141090000	36377000	33833000	29948000	21606000
A0A0R4J038	A0A0R4J038;O08677;D3YTY9;O08677-3;D3Z2B2;CON__P01045-1;CON__Q2KJ62;CON__P01044-1	Kng1	Kininogen-1;Kininogen-1 heavy chain;Bradykinin;Kininogen-1 light chain	tr|A0A0R4J038|A0A0R4J038_MOUSE Bradykinin OS=Mus musculus OX=10090 GN=Kng1 PE=1 SV=1;sp|O08677|KNG1_MOUSE Kininogen-1 OS=Mus musculus OX=10090 GN=Kng1 PE=1 SV=1;tr|D3YTY9|D3YTY9_MOUSE Kininogen-1 OS=Mus musculus OX=10090 GN=Kng1 PE=1 SV=1;sp|O08677-3|KNG1_	30	4439500000	4174300000	3764000000	3803400000	3725000000	4609500000	3991900000	3191400000	4295000000	4029000000	3959800000	2931600000	4157400000	4431600000	3746000000	4192600000	3626500000	3642700000	2731800000	2905100000	3387900000	3238000000	3020600000	2707200000	3398000000	2823600000	3181400000	2467600000	3232100000	3594100000	3085700000	2895900000
Q3UPN1	Q3UPN1;P29533;P29533-2;A0A0G2JFP9	Vcam1	Vascular cell adhesion protein 1	tr|Q3UPN1|Q3UPN1_MOUSE Vascular cell adhesion protein 1 OS=Mus musculus OX=10090 GN=Vcam1 PE=1 SV=1;sp|P29533|VCAM1_MOUSE Vascular cell adhesion protein 1 OS=Mus musculus OX=10090 GN=Vcam1 PE=1 SV=1;sp|P29533-2|VCAM1_MOUSE Isoform 2 of Vascular cell adhesi	24	65248000	37888000	42644000	37742000	33586000	45155000	37725000	24783000	31830000	33424000	39892000	28279000	36468000	38998000	25360000	30232000	37279000	39783000	27229000	27977000	32741000	35930000	24635000	22110000	26730000	23275000	33472000	17715000	32534000	31634000	27585000	22872000
E9PZ00	E9PZ00;Q8BFQ1;K3W4L3;J3QPG5;Q61207	Psap	Prosaposin	tr|E9PZ00|E9PZ00_MOUSE Prosaposin OS=Mus musculus OX=10090 GN=Psap PE=1 SV=1;tr|Q8BFQ1|Q8BFQ1_MOUSE Prosaposin OS=Mus musculus OX=10090 GN=Psap PE=1 SV=1;tr|K3W4L3|K3W4L3_MOUSE Prosaposin OS=Mus musculus OX=10090 GN=Psap PE=1 SV=1;tr|J3QPG5|J3QPG5_MOUSE Pr	13	31045000	32708000	18921000	27652000	24038000	16222000	29540000	18171000	13335000	29808000	20596000	12958000	14643000	20479000	19814000	23268000	25202000	28741000	16406000	20846000	17849000	19688000	19045000	13096000	16071000	9476700	14903000	12224000	20326000	14713000	12911000	14298000
P04247	P04247;A0A2R8VK58;A0A2R8W6F8	Mb	Myoglobin	sp|P04247|MYG_MOUSE Myoglobin OS=Mus musculus OX=10090 GN=Mb PE=1 SV=3;tr|A0A2R8VK58|A0A2R8VK58_MOUSE Myoglobin (Fragment) OS=Mus musculus OX=10090 GN=Mb PE=1 SV=1;tr|A0A2R8W6F8|A0A2R8W6F8_MOUSE Myoglobin OS=Mus musculus OX=10090 GN=Mb PE=1 SV=1	7	113270000	25762000	73648000	33298000	54050000	99237000	20458000	26260000	49674000	138500	75963000	121840000	84508000	97518000	79578000	102380000	89807000	16298000	70138000	18673000	21724000	120780000	18670000	86363000	8188100	12237000	76910000	56199000	67412000	98627000	47757000	15172000
Q9EQH2	Q9EQH2;A0A1Y7VNJ8;A0A1Y7VNY4;A0A1Y7VMT6	Erap1	Endoplasmic reticulum aminopeptidase 1	sp|Q9EQH2|ERAP1_MOUSE Endoplasmic reticulum aminopeptidase 1 OS=Mus musculus OX=10090 GN=Erap1 PE=1 SV=2	8	7196900	8052000	7017300	7325600	5496200	5494900	9237000	5254900	5952000	3734400	7774500	4625000	7407400	9820800	6306300	6006100	6747200	7067800	4550700	4492800	7785500	5774200	5200600	5313100	4583200	3269300	5710500	3077700	4713700	6031200	4637600	4103800
P20918	P20918;CON__P06868	Plg	Plasminogen;Plasmin heavy chain A;Activation peptide;Angiostatin;Plasmin heavy chain A, short form;Plasmin light chain B	sp|P20918|PLMN_MOUSE Plasminogen OS=Mus musculus OX=10090 GN=Plg PE=1 SV=3	55	2928600000	2500400000	2593600000	2059600000	2535300000	2489300000	2513300000	2004600000	2615300000	2523300000	2323900000	1431600000	2426100000	2374900000	2180300000	2123900000	2067400000	2048700000	1510200000	1726200000	2221900000	1922400000	1845000000	1443300000	2122000000	1411100000	1782500000	1543400000	1987000000	1905200000	1745900000	1853100000
P00920	P00920;A0A0A6YX78	Ca2	Carbonic anhydrase 2	sp|P00920|CAH2_MOUSE Carbonic anhydrase 2 OS=Mus musculus OX=10090 GN=Ca2 PE=1 SV=4	11	182830000	65411000	120290000	115290000	111820000	181580000	191770000	83082000	101560000	52025000	173060000	166490000	139460000	96605000	69934000	188570000	187070000	126090000	84704000	78271000	99963000	184700000	83961000	163760000	42016000	51198000	56030000	68799000	102340000	126630000	72530000	51124000
Q9DBB9	Q9DBB9	Cpn2	Carboxypeptidase N subunit 2	sp|Q9DBB9|CPN2_MOUSE Carboxypeptidase N subunit 2 OS=Mus musculus OX=10090 GN=Cpn2 PE=1 SV=2	20	1063500000	1087100000	1025300000	776120000	908360000	889350000	918610000	708290000	910530000	912900000	869870000	751230000	988660000	957430000	747880000	810400000	923560000	879360000	636060000	743330000	764440000	785530000	643270000	642520000	616170000	481280000	689200000	441280000	772790000	746200000	701620000	583270000
P01027	P01027;P01027-2;H3BL60;H3BKW9	C3	Complement C3;Complement C3 beta chain;C3-beta-c;Complement C3 alpha chain;C3a anaphylatoxin;Acylation stimulating protein;Complement C3b alpha chain;Complement C3c alpha chain fragment 1;Complement C3dg fragment;Complement C3g fragment;Complement C3d fragment;Complement C3f fragment;Complement C3c alpha chain fragment 2	sp|P01027|CO3_MOUSE Complement C3 OS=Mus musculus OX=10090 GN=C3 PE=1 SV=3	114	5096900000	6302800000	3646000000	4192400000	7906900000	4943000000	7106800000	6676400000	6524800000	4822900000	5466700000	5045800000	8149900000	7986100000	7189400000	7317200000	5860600000	5885900000	4402800000	5631900000	5340700000	5051700000	4161100000	3988700000	4229600000	3158300000	4151200000	2926300000	5743900000	5792000000	4468900000	4594500000
Q9JJN5	Q9JJN5;CON__Q2KJ83	Cpn1	Carboxypeptidase N catalytic chain	sp|Q9JJN5|CBPN_MOUSE Carboxypeptidase N catalytic chain OS=Mus musculus OX=10090 GN=Cpn1 PE=1 SV=1	14	613740000	574520000	603620000	460950000	579530000	486650000	499680000	396100000	510900000	476570000	485150000	380990000	565800000	533990000	436000000	459360000	514480000	466520000	348100000	424610000	429450000	380860000	397640000	328790000	336610000	286860000	400010000	282430000	456520000	400140000	391110000	326080000
P68134	P68134;P68033;P62737;P63268;A0A1D5RM20;D3Z2K3;A0A494B9T3;D3YZY0;A0A0U1RQ96	Acta1;Actc1;Acta2;Actg2	Actin, alpha skeletal muscle;Actin, alpha cardiac muscle 1;Actin, aortic smooth muscle;Actin, gamma-enteric smooth muscle	sp|P68134|ACTS_MOUSE Actin, alpha skeletal muscle OS=Mus musculus OX=10090 GN=Acta1 PE=1 SV=1;sp|P68033|ACTC_MOUSE Actin, alpha cardiac muscle 1 OS=Mus musculus OX=10090 GN=Actc1 PE=1 SV=1;sp|P62737|ACTA_MOUSE Actin, aortic smooth muscle OS=Mus musculus OX	3	154120000	157920000	167790000	94389000	115620000	175840000	153850000	92686000	104960000	58482000	124370000	61845000	136210000	49077000	73014000	150910000	113320000	139300000	64521000	108940000	105480000	109120000	102520000	82398000	87417000	89762000	58244000	74063000	106170000	80171000	50148000	58772000
P70375	P70375	F7	Coagulation factor VII;Factor VII light chain;Factor VII heavy chain	sp|P70375|FA7_MOUSE Coagulation factor VII OS=Mus musculus OX=10090 GN=F7 PE=1 SV=1	13	24409000	32256000	26869000	28013000	32195000	20221000	27979000	22177000	27248000	25631000	26143000	19576000	29584000	25843000	28463000	21118000	24811000	25001000	16018000	24892000	24305000	24999000	19273000	18539000	20689000	12098000	18668000	14192000	23232000	16758000	17929000	17336000
A0A0R4IZW5	A0A0R4IZW5;P09803	Cdh1	Cadherin-1;E-Cad/CTF1;E-Cad/CTF2;E-Cad/CTF3	tr|A0A0R4IZW5|A0A0R4IZW5_MOUSE Cadherin-1 OS=Mus musculus OX=10090 GN=Cdh1 PE=1 SV=1;sp|P09803|CADH1_MOUSE Cadherin-1 OS=Mus musculus OX=10090 GN=Cdh1 PE=1 SV=1	4	24858000	14113000	20555000	13786000	16580000	16864000	14327000	9093400	12871000	9655700	19883000	8672900	13760000	16473000	12557000	12484000	13870000	15750000	9667300	8517600	13387000	14518000	13430000	8958100	10557000	6421800	11688000	7076900	14224000	14570000	9168600	8668800
E9PVD2	E9PVD2;A0A2K6EDJ7	Itih4	Inter alpha-trypsin inhibitor, heavy chain 4	tr|E9PVD2|E9PVD2_MOUSE Inter alpha-trypsin inhibitor, heavy chain 4 OS=Mus musculus OX=10090 GN=Itih4 PE=1 SV=1;tr|A0A2K6EDJ7|A0A2K6EDJ7_MOUSE Inter alpha-trypsin inhibitor, heavy chain 4 OS=Mus musculus OX=10090 GN=Itih4 PE=1 SV=1	42	2209200000	2786700000	2044900000	1780200000	1497300000	1523100000	1568900000	1240100000	1440300000	1852300000	1732300000	1334600000	1655700000	1727300000	1268700000	1414600000	1725600000	1775900000	1370800000	2627900000	1125300000	1232600000	935750000	871850000	1847100000	1149300000	1025900000	1092900000	1089500000	1030700000	926400000	827090000
O88200	O88200	Clec11a	C-type lectin domain family 11 member A	sp|O88200|CLC11_MOUSE C-type lectin domain family 11 member A OS=Mus musculus OX=10090 GN=Clec11a PE=1 SV=1	4	6216600	2608900	2256700	2001600	4736300	8604600	3809600	4447800	2144100	2987600	3459700	2196200	2197000	2597400	3993100	5541300	317536	3134900	1656000	2381700	4690300	2311600	3714100	3500500	2664400	3832700	3239000	1938700	2484000	3138500	3207900	3390400
E9QP56	E9QP56;A0A0R4J1N3;P33622	Apoc3	Apolipoprotein C-III	tr|E9QP56|E9QP56_MOUSE Apolipoprotein C-III OS=Mus musculus OX=10090 GN=Apoc3 PE=1 SV=1;tr|A0A0R4J1N3|A0A0R4J1N3_MOUSE Apolipoprotein C-III OS=Mus musculus OX=10090 GN=Apoc3 PE=1 SV=1;sp|P33622|APOC3_MOUSE Apolipoprotein C-III OS=Mus musculus OX=10090 GN=A	3	1011100000	2303000000	2765000000	1704700000	1863200000	1017700000	2384300000	1700000000	2564000000	1937700000	1864600000	1207000000	2360000000	2290600000	1819800000	750710000	1830900000	1683200000	1282700000	1522800000	1517300000	1961700000	1550400000	1667800000	1134000000	332780000	1199900000	721720000	1484800000	1300300000	1900700000	1374500000
Q3UTR7	Q3UTR7;A0A5F8MPW1;P11859	Agt	Angiotensinogen;Angiotensin-1;Angiotensin-2;Angiotensin-3;Angiotensin-4;Angiotensin 1-9;Angiotensin 1-7;Angiotensin 1-5;Angiotensin 1-4	tr|Q3UTR7|Q3UTR7_MOUSE Angiotensin 1-10 OS=Mus musculus OX=10090 GN=Agt PE=1 SV=1;tr|A0A5F8MPW1|A0A5F8MPW1_MOUSE Angiotensin 1-10 OS=Mus musculus OX=10090 GN=Agt PE=1 SV=1;sp|P11859|ANGT_MOUSE Angiotensinogen OS=Mus musculus OX=10090 GN=Agt PE=1 SV=1	19	492330000	575730000	539530000	408600000	433530000	485330000	394350000	297590000	345990000	424880000	483910000	392790000	546610000	502430000	344590000	364640000	471000000	496460000	317980000	362710000	338910000	364170000	298790000	277890000	315190000	228660000	420000000	226910000	319960000	363270000	287170000	245860000
A0A286YDL1	A0A286YDL1;Q68FM4;P28828;A0A286YCW9	Ptprm	Protein-tyrosine-phosphatase;Receptor-type tyrosine-protein phosphatase mu	tr|A0A286YDL1|A0A286YDL1_MOUSE Receptor-type tyrosine-protein phosphatase mu OS=Mus musculus OX=10090 GN=Ptprm PE=1 SV=1;tr|Q68FM4|Q68FM4_MOUSE Protein-tyrosine-phosphatase OS=Mus musculus OX=10090 GN=Ptprm PE=1 SV=1;sp|P28828|PTPRM_MOUSE Receptor-type tyr	4	4514000	4403500	4298500	3023500	3143200	5026000	4845100	3484900	4238900	318575	5261100	3760400	2800200	4674900	4168300	3832200	3674500	4287900	2118800	2904200	2915700	3579300	2937800	2339200	3317600	1742200	3869300	1668700	2764100	2547500	4076400	2052600
P32261	P32261;A0A0A6YWH7;A0A0A6YX70;CON__P41361;A0A0A6YXS8;A0A0A6YX49	Serpinc1	Antithrombin-III	sp|P32261|ANT3_MOUSE Antithrombin-III OS=Mus musculus OX=10090 GN=Serpinc1 PE=1 SV=1	33	3788400000	4386600000	4141000000	3751500000	3047500000	3000500000	3780600000	2588100000	3464200000	3812800000	2610700000	2357000000	3788300000	3975200000	2808400000	2773900000	3568900000	3582500000	2145200000	2866500000	2945100000	2255000000	2571200000	2604000000	2259900000	1817000000	2490900000	1613800000	2659800000	2460200000	2694400000	2372100000
P42703	P42703;A0A2I3BRT7	Lifr	Leukemia inhibitory factor receptor	sp|P42703|LIFR_MOUSE Leukemia inhibitory factor receptor OS=Mus musculus OX=10090 GN=Lifr PE=1 SV=1	29	216540000	116210000	164650000	208580000	261770000	293640000	189370000	224070000	223320000	222610000	266000000	181560000	238930000	188540000	381710000	370770000	159740000	138810000	99479000	115820000	232270000	155640000	212210000	159270000	224420000	146970000	224000000	195730000	203950000	207140000	182540000	175990000
D3Z6T3	D3Z6T3;P70269	Ctse	Cathepsin E	tr|D3Z6T3|D3Z6T3_MOUSE Cathepsin E OS=Mus musculus OX=10090 GN=Ctse PE=1 SV=1;sp|P70269|CATE_MOUSE Cathepsin E OS=Mus musculus OX=10090 GN=Ctse PE=1 SV=2	2	39814000	42670000	36874000	49515000	26695000	40310000	43940000	24200000	33077000	31871000	52831000	31508000	45256000	56880000	24701000	45958000	36190000	53805000	28679000	39240000	38897000	30834000	283782	18886000	25246000	25886000	38331000	17344000	31364000	37086000	25476000	24916000
A0A0R4J0S2	A0A0R4J0S2;P70389	Igfals	Insulin-like growth factor-binding protein complex acid labile subunit	tr|A0A0R4J0S2|A0A0R4J0S2_MOUSE Insulin-like growth factor-binding protein complex acid labile subunit OS=Mus musculus OX=10090 GN=Igfals PE=1 SV=1;sp|P70389|ALS_MOUSE Insulin-like growth factor-binding protein complex acid labile subunit OS=Mus musculus OX	21	228080000	241090000	171530000	212770000	287770000	203510000	227450000	164430000	200990000	249000000	228670000	166760000	207550000	239260000	224130000	202260000	224280000	243270000	158290000	133610000	201510000	159600000	168180000	132700000	162270000	89790000	177410000	109310000	180050000	170330000	162770000	133920000
P55284	P55284	Cdh5	Cadherin-5	sp|P55284|CADH5_MOUSE Cadherin-5 OS=Mus musculus OX=10090 GN=Cdh5 PE=1 SV=2	9	25071000	21492000	23156000	22030000	17173000	19182000	17715000	12197000	14632000	15837000	20043000	14891000	22145000	23189000	14707000	17924000	16674000	18680000	14905000	19500000	14096000	17112000	14816000	13788000	9701500	8605500	14369000	9807500	14585000	13778000	14046000	12495000
Q8HWB2	Q8HWB2;P01902	H2-Q4	Histocompatibility 2, Q region locus 4	tr|Q8HWB2|Q8HWB2_MOUSE Histocompatibility 2, Q region locus 4 OS=Mus musculus OX=10090 GN=H2-Q4 PE=1 SV=1	6	39170000	29135000	26239000	19725000	19571000	17968000	24011000	24393000	17198000	20313000	29985000	13980000	21045000	22445000	14649000	20007000	18376000	23392000	16220000	16790000	17926000	22545000	18768000	13753000	19533000	14459000	18591000	11314000	19726000	12438000	12316000	14491000
P47879	P47879;H3BLB7;H3BJT2	Igfbp4	Insulin-like growth factor-binding protein 4	sp|P47879|IBP4_MOUSE Insulin-like growth factor-binding protein 4 OS=Mus musculus OX=10090 GN=Igfbp4 PE=1 SV=2;tr|H3BLB7|H3BLB7_MOUSE Insulin-like growth factor-binding protein 4 OS=Mus musculus OX=10090 GN=Igfbp4 PE=1 SV=1	5	12001000	12594000	12487000	11267000	13896000	9151200	9371100	5398900	11212000	12806000	10513000	10767000	9643400	11528000	11063000	7836500	12815000	12880000	8543300	9797700	7993900	9563400	6121400	7692000	6977700	3556200	8854800	3514600	8643000	6050500	8074200	7616500
Q8BSB7	Q8BSB7;A2ARA4;A2ARA3;A2ARA0;O54819-2;O54819	Tfpi	Tissue factor pathway inhibitor	tr|Q8BSB7|Q8BSB7_MOUSE Tissue factor pathway inhibitor OS=Mus musculus OX=10090 GN=Tfpi PE=1 SV=1;tr|A2ARA4|A2ARA4_MOUSE Tissue factor pathway inhibitor (Fragment) OS=Mus musculus OX=10090 GN=Tfpi PE=1 SV=1;tr|A2ARA3|A2ARA3_MOUSE Tissue factor pathway inhi	5	25579000	26457000	22198000	19132000	20568000	18601000	14529000	13737000	19220000	24515000	18538000	20976000	22923000	19775000	22837000	21705000	14903000	17997000	12490000	16850000	15633000	13210000	12454000	13291000	14503000	13347000	20095000	12337000	18481000	14464000	18583000	18953000
Q9R098	Q9R098;A0A0J9YUY6;CON__ENSEMBL:ENSBTAP00000023055	Hgfac	Hepatocyte growth factor activator;Hepatocyte growth factor activator short chain;Hepatocyte growth factor activator long chain	sp|Q9R098|HGFA_MOUSE Hepatocyte growth factor activator OS=Mus musculus OX=10090 GN=Hgfac PE=1 SV=1	21	178390000	200260000	201080000	185490000	144480000	165660000	154970000	122970000	170370000	177330000	130860000	119560000	161790000	177370000	122200000	138830000	154400000	161650000	124220000	137340000	125000000	128620000	117920000	109650000	115130000	69765000	113470000	90948000	118810000	107140000	114130000	118570000
Q62351	Q62351;Q8C872	Tfrc	Transferrin receptor protein 1	sp|Q62351|TFR1_MOUSE Transferrin receptor protein 1 OS=Mus musculus OX=10090 GN=Tfrc PE=1 SV=1;tr|Q8C872|Q8C872_MOUSE Transferrin receptor protein 1 OS=Mus musculus OX=10090 GN=Tfrc PE=1 SV=1	22	50018000	26633000	27805000	38107000	29225000	40093000	29133000	19256000	29731000	29089000	39963000	25869000	36601000	33431000	22214000	42642000	34592000	28742000	20495000	22870000	27822000	27153000	15606000	16231000	17527000	33290000	28139000	20915000	22693000	27694000	24686000	19865000
P19221	P19221;H7BX99	F2	Prothrombin;Activation peptide fragment 1;Activation peptide fragment 2;Thrombin light chain;Thrombin heavy chain;Prothrombin	sp|P19221|THRB_MOUSE Prothrombin OS=Mus musculus OX=10090 GN=F2 PE=1 SV=1;tr|H7BX99|H7BX99_MOUSE Prothrombin OS=Mus musculus OX=10090 GN=F2 PE=1 SV=1	36	1663800000	1710200000	1616900000	1363600000	1391300000	1286600000	1397200000	1151800000	1377400000	1437300000	1181400000	802310000	1424900000	1462300000	1314800000	1113700000	1327200000	1451300000	899780000	1165900000	1141500000	911760000	943490000	776970000	982820000	767670000	999950000	682130000	1059200000	989940000	1091100000	977560000
P10605	P10605	Ctsb	Cathepsin B;Cathepsin B light chain;Cathepsin B heavy chain	sp|P10605|CATB_MOUSE Cathepsin B OS=Mus musculus OX=10090 GN=Ctsb PE=1 SV=2	12	164980000	146740000	133730000	138240000	108900000	102800000	109000000	72528000	105620000	135770000	128530000	95281000	96726000	111430000	89914000	101920000	132370000	121830000	81959000	109400000	89297000	84140000	84510000	75460000	77896000	62321000	84099000	55461000	87851000	80649000	72118000	73131000
Q80YX1-2	Q80YX1-2;Q80YX1-5;Q80YX1-4;Q80YX1-3;Q80YX1;Q80YX0	Tnc	Tenascin	sp|Q80YX1-2|TENA_MOUSE Isoform 2 of Tenascin OS=Mus musculus OX=10090 GN=Tnc;sp|Q80YX1-5|TENA_MOUSE Isoform 5 of Tenascin OS=Mus musculus OX=10090 GN=Tnc;sp|Q80YX1-4|TENA_MOUSE Isoform 4 of Tenascin OS=Mus musculus OX=10090 GN=Tnc;sp|Q80YX1-3|TENA_MOUSE Is	10	7393000	6512900	7279000	3927400	6870300	8258000	6181700	6005000	5735800	3766300	8070000	5158000	6251600	6209700	6242000	6026300	4781500	4853000	2956400	3337600	3961100	4854300	5729100	3909600	10298000	3460500	4881000	4548000	5033500	4676400	4261200	2831500
Q5MJS3	Q5MJS3;E0CY01;Q8CID3	Fam20c	Extracellular serine/threonine protein kinase FAM20C	sp|Q5MJS3|FA20C_MOUSE Extracellular serine/threonine protein kinase FAM20C OS=Mus musculus OX=10090 GN=Fam20c PE=1 SV=1	6	6286800	7183200	6224500	5976500	3661800	4588900	5129500	2755800	5175400	4832100	4145100	3361500	4409100	5152700	4162600	3371800	2872900	4598500	4508500	3781800	516736	5613900	3751300	2987700	3698900	2673300	4070100	3019300	4092000	4216100	2641700	3852900
Q9QUN9	Q9QUN9	Dkk3	Dickkopf-related protein 3	sp|Q9QUN9|DKK3_MOUSE Dickkopf-related protein 3 OS=Mus musculus OX=10090 GN=Dkk3 PE=2 SV=1	3	6797300	2595000	3689900	3339600	5453200	5209900	4882700	2516400	3324500	2210000	2959400	3544900	3423100	5586000	2962900	4035700	317536	3046900	2404600	3145700	4599300	2643800	3059700	3744700	4046300	3951400	2979200	2246100	3087700	3449900	1379700	2395200
A0A0J9YV87	A0A0J9YV87;P26618-2;P26618;A0A0J9YVF3	Pdgfra	Platelet-derived growth factor receptor alpha	tr|A0A0J9YV87|A0A0J9YV87_MOUSE Platelet-derived growth factor receptor alpha OS=Mus musculus OX=10090 GN=Pdgfra PE=1 SV=1;sp|P26618-2|PGFRA_MOUSE Isoform 2 of Platelet-derived growth factor receptor alpha OS=Mus musculus OX=10090 GN=Pdgfra;sp|P26618|PGFRA_	6	4674100	4462700	3675400	3314100	4597000	6123100	3976500	3408400	2977500	3460300	4140600	3142800	3995700	4484400	3019300	3909200	3589100	3216200	2294800	331010	2585200	3150600	3489000	1927900	2982100	4770000	3370900	2984200	2795000	3479700	2932200	3195100
P17742	P17742;A0A1L1SST0;A0A1L1SRX5;V9GXC1;V9GX31	Ppia	Peptidyl-prolyl cis-trans isomerase A;Peptidyl-prolyl cis-trans isomerase A, N-terminally processed	sp|P17742|PPIA_MOUSE Peptidyl-prolyl cis-trans isomerase A OS=Mus musculus OX=10090 GN=Ppia PE=1 SV=2;tr|A0A1L1SST0|A0A1L1SST0_MOUSE Peptidyl-prolyl cis-trans isomerase OS=Mus musculus OX=10090 GN=Ppia PE=1 SV=1	5	13203000	8546700	12286000	7261700	7206400	11773000	12747000	4438800	3114400	3322500	17754000	18410000	8167500	9424700	4374700	10602000	12319000	10164000	7263500	5255300	5719000	12983000	4390200	10880000	3065600	2557800	5821400	6449400	11152000	9312300	4183400	1830500
P70195	P70195	Psmb7	Proteasome subunit beta type-7	sp|P70195|PSB7_MOUSE Proteasome subunit beta type-7 OS=Mus musculus OX=10090 GN=Psmb7 PE=1 SV=1	3	6374800	3878900	4873700	3661700	4281200	5249700	3809300	2530300	2976800	2093500	2831500	1925600	3408600	170466	1489400	4858900	4000200	3702500	2160100	3112700	3043700	3285700	1208100	2843400	2476100	2731500	1962700	2091000	2877800	2168400	1412300	1294400
P16406	P16406;F7B9G4;F6YHW2	Enpep	Glutamyl aminopeptidase	sp|P16406|AMPE_MOUSE Glutamyl aminopeptidase OS=Mus musculus OX=10090 GN=Enpep PE=1 SV=1;tr|F7B9G4|F7B9G4_MOUSE Aminopeptidase A (Fragment) OS=Mus musculus OX=10090 GN=Enpep PE=1 SV=1	7	8100400	7024600	8831400	3662500	3450100	4574900	4785300	2594900	4290200	5798700	4358500	4716800	4757700	3996500	3544400	4999400	5696800	6647700	3812500	5049100	4651400	6884800	283782	2960600	328108	2744100	3427700	264280	3848000	5031000	3615200	3527900
O70165	O70165	Fcn1	Ficolin-1	sp|O70165|FCN1_MOUSE Ficolin-1 OS=Mus musculus OX=10090 GN=Fcn1 PE=1 SV=1	8	93909000	73396000	79379000	79024000	57866000	63204000	67534000	55743000	84851000	71008000	77959000	44578000	78372000	77635000	63084000	68787000	66428000	59282000	47319000	53432000	57987000	47582000	48636000	46126000	52365000	46796000	49267000	44342000	58218000	54324000	49068000	57257000
Q9R182	Q9R182	Angptl3	Angiopoietin-related protein 3	sp|Q9R182|ANGL3_MOUSE Angiopoietin-related protein 3 OS=Mus musculus OX=10090 GN=Angptl3 PE=1 SV=1	10	5755700	6472900	4896000	5247800	7184500	6030500	8645400	16044000	9209600	8129800	4292000	3522900	5472000	5342600	8569100	3654000	6909700	10492000	3069200	3493600	6471600	5498300	2658400	3619400	5138200	1050800	5366200	1876000	6516700	5064200	6764200	5737900
P05064	P05064;A6ZI44;D3YWI1;D3Z510;A0A0U1RPN8;Q9CPQ9;A6ZI46;D3YV98;A0A0U1RPT5;A6ZI47;P05063	Aldoa;Aldoart1;Aldoart2	Fructose-bisphosphate aldolase A;Fructose-bisphosphate aldolase	sp|P05064|ALDOA_MOUSE Fructose-bisphosphate aldolase A OS=Mus musculus OX=10090 GN=Aldoa PE=1 SV=2;tr|A6ZI44|A6ZI44_MOUSE Fructose-bisphosphate aldolase OS=Mus musculus OX=10090 GN=Aldoa PE=1 SV=1;tr|D3YWI1|D3YWI1_MOUSE Fructose-bisphosphate aldolase (Frag	14	28945000	14281000	17751000	12545000	16695000	28858000	17606000	10802000	12872000	11020000	21845000	17409000	17310000	15811000	12855000	23747000	17410000	11855000	10031000	10095000	11553000	14176000	10493000	12318000	16598000	21925000	13131000	10182000	12491000	15735000	9487300	8317500
A0A286YDT5	A0A286YDT5;G5E8Q8;A0A286YD74	Adgrf5	Adhesion G protein-coupled receptor F5 (Fragment)	tr|A0A286YDT5|A0A286YDT5_MOUSE Adhesion G protein-coupled receptor F5 (Fragment) OS=Mus musculus OX=10090 GN=Adgrf5 PE=1 SV=1;sp|G5E8Q8|AGRF5_MOUSE Adhesion G protein-coupled receptor F5 OS=Mus musculus OX=10090 GN=Adgrf5 PE=1 SV=1	6	7851100	7156500	9186100	8465000	6942400	6287300	11091000	5768900	6622300	6479700	8276400	7818100	7580500	9320600	5869700	8849000	7799900	7730500	5026900	6444100	6460700	6128500	6513600	6418100	4714800	4122300	377153	5620300	6215200	6898800	5021700	5091600
A0A1B0GSX0	A0A1B0GSX0;P06151;A0A1B0GSR9;D3YZQ9;A0A1B0GT41;A0A1B0GQX5;A0A1B0GSL7;A0A1B0GRW9;A0A1B0GS79;A0A1B0GRC1;A0A1B0GRS2;D3YVR7;D3YZE4;P00342;A0A1B0GSR2;A0A1B0GRE9	Ldha	L-lactate dehydrogenase A chain;L-lactate dehydrogenase	tr|A0A1B0GSX0|A0A1B0GSX0_MOUSE L-lactate dehydrogenase OS=Mus musculus OX=10090 GN=Ldha PE=1 SV=1;sp|P06151|LDHA_MOUSE L-lactate dehydrogenase A chain OS=Mus musculus OX=10090 GN=Ldha PE=1 SV=3;tr|A0A1B0GSR9|A0A1B0GSR9_MOUSE L-lactate dehydrogenase OS=Mus	11	11400000	6162100	9697300	6154400	7192100	9802100	7799100	5558100	4391200	3000600	11718000	11658000	5534200	6903000	4921500	8607600	8679400	6256600	6142800	4689800	3765500	8994900	5262400	7474600	2644600	2674600	4976300	6371000	5026400	6700400	4822000	3556700
Q6S9I3	Q6S9I3	Kng2	Kininogen 2	tr|Q6S9I3|Q6S9I3_MOUSE Bradykinin OS=Mus musculus OX=10090 GN=Kng2 PE=1 SV=1	17	261460000	288110000	293650000	259290000	212010000	239650000	234500000	175020000	243790000	235860000	227010000	153080000	267240000	246600000	196130000	198270000	215670000	226140000	152800000	205560000	174550000	180080000	156580000	139430000	177360000	153500000	177490000	127130000	166700000	173750000	157600000	139020000
G3X9T8	G3X9T8;G3X8Q5;E9PZD8;Q61147;G3UXG1;G3UWP5;CON__ENSEMBL:ENSBTAP00000031900;G3UZ53	Cp	Ceruloplasmin	tr|G3X9T8|G3X9T8_MOUSE Ceruloplasmin OS=Mus musculus OX=10090 GN=Cp PE=1 SV=1;tr|G3X8Q5|G3X8Q5_MOUSE Ceruloplasmin OS=Mus musculus OX=10090 GN=Cp PE=1 SV=1;tr|E9PZD8|E9PZD8_MOUSE Ceruloplasmin OS=Mus musculus OX=10090 GN=Cp PE=1 SV=1;sp|Q61147|CERU_MOUSE C	56	2535800000	2389900000	2390800000	1806400000	2136600000	1950000000	2048200000	1733700000	1866900000	2030900000	2218300000	1876400000	2035600000	2207500000	1834100000	1803600000	1823500000	1929400000	1474300000	1610300000	1506600000	1574100000	1443500000	1323400000	1825300000	1173400000	1417800000	1250100000	1550900000	1507900000	1376600000	1164400000
P20065-2	P20065-2		Isoform Short of Thymosin beta-4	sp|P20065-2|TYB4_MOUSE Isoform Short of Thymosin beta-4 OS=Mus musculus OX=10090 GN=Tmsb4x	2	23113000	18350000	19700000	13926000	9233300	5865900	9746700	7279300	7839800	2927500	14503000	3167800	8284800	1286500	3598800	11019000	11092000	8964900	8083200	6710800	7573100	10132000	10493000	4354400	4220100	1811700	4529400	3552600	15890000	13583000	458622	3896500
Q07968	Q07968;CON__Q2TBQ1	F13b	Coagulation factor XIII B chain	sp|Q07968|F13B_MOUSE Coagulation factor XIII B chain OS=Mus musculus OX=10090 GN=F13b PE=1 SV=2	29	145570000	119630000	135360000	112040000	158340000	156130000	161070000	125180000	160190000	133990000	132700000	112650000	188490000	172140000	161860000	156360000	116500000	114690000	92649000	87858000	147140000	129000000	92554000	84946000	77624000	75578000	112270000	58984000	128620000	127120000	112900000	123270000
P52430	P52430;H3BK03;H3BLB8	Pon1	Serum paraoxonase/arylesterase 1	sp|P52430|PON1_MOUSE Serum paraoxonase/arylesterase 1 OS=Mus musculus OX=10090 GN=Pon1 PE=1 SV=2;tr|H3BK03|H3BK03_MOUSE Serum paraoxonase/arylesterase 1 (Fragment) OS=Mus musculus OX=10090 GN=Pon1 PE=1 SV=9	17	1652900000	2126300000	2449900000	1884200000	1893000000	1357900000	2137900000	1338500000	1544800000	1723600000	1880900000	1642700000	2361800000	2043400000	1433300000	1199800000	1657200000	1737900000	1255600000	1357500000	1694300000	1662200000	1081000000	1144200000	832860000	611070000	1484700000	727240000	1695900000	1339300000	1303600000	1090200000
A0A0R4J0H5	A0A0R4J0H5;A0A140T8R4;Q6S5C2;Q6S5C2-2	Gnptg	N-acetylglucosamine-1-phosphotransferase subunit gamma	tr|A0A0R4J0H5|A0A0R4J0H5_MOUSE N-acetylglucosamine-1-phosphotransferase subunit gamma OS=Mus musculus OX=10090 GN=Gnptg PE=1 SV=1;tr|A0A140T8R4|A0A140T8R4_MOUSE N-acetylglucosamine-1-phosphotransferase subunit gamma OS=Mus musculus OX=10090 GN=Gnptg PE=1 S	6	7461500	8110300	7454100	8355100	8395200	6141600	8235500	5657300	9559600	7244000	7737800	4875100	7297700	6712100	7485100	5790400	8350000	8415700	5982000	6295300	4592300	5671500	4061500	3448200	4621500	3080200	4856600	3800000	5759700	5466200	5300800	4228700
P08121	P08121;A0A087WPJ5	Col3a1	Collagen alpha-1(III) chain	sp|P08121|CO3A1_MOUSE Collagen alpha-1(III) chain OS=Mus musculus OX=10090 GN=Col3a1 PE=1 SV=4	6	3218600	1129800	1879300	1882500	3483300	4807500	1380300	940650	1225500	922150	2356800	1127800	1054200	1035600	2342000	3381800	2903000	1729900	871790	1480400	1671200	1829000	2118400	2142800	1379500	1004400	638760	907400	960500	1080800	1164700	1288600
P70428	P70428;V9GX32;E9Q1M5;A2AIG3;A2AIG6	Ext2	Exostosin-2	sp|P70428|EXT2_MOUSE Exostosin-2 OS=Mus musculus OX=10090 GN=Ext2 PE=1 SV=2;tr|V9GX32|V9GX32_MOUSE Exostosin-2 OS=Mus musculus OX=10090 GN=Ext2 PE=1 SV=1;tr|E9Q1M5|E9Q1M5_MOUSE Exostosin-2 OS=Mus musculus OX=10090 GN=Ext2 PE=1 SV=1;tr|A2AIG3|A2AIG3_MOUSE E	8	6655200	4174100	5202500	4389400	3873100	5070900	4718700	3348700	4832900	6077900	4341100	4142700	7048600	7428300	4871100	5920500	5595900	6503600	4354800	4368000	4645300	218384	4519400	3385800	2304600	1905100	3264300	2004000	4151700	4277500	4508500	2992600
Q60692	Q60692	Psmb6	Proteasome subunit beta type-6	sp|Q60692|PSB6_MOUSE Proteasome subunit beta type-6 OS=Mus musculus OX=10090 GN=Psmb6 PE=1 SV=3	4	11018000	7775900	6636000	6382800	9435900	16879000	6684100	5033200	7123700	4679800	5304900	4249900	6275600	6228800	5457400	9479100	8723200	8300300	3614800	4630900	6009900	4460200	2105900	4582600	5381900	5128300	5429000	3997900	5778200	7488900	4323900	4802600
O89103	O89103	Cd93	Complement component C1q receptor	sp|O89103|C1QR1_MOUSE Complement component C1q receptor OS=Mus musculus OX=10090 GN=Cd93 PE=1 SV=1	5	11794000	8805400	7245000	3584200	7415400	10650000	9602700	5926200	6861400	5841800	8728500	3653600	9552900	10949000	6358500	7807200	7766800	6309300	4999700	4765500	8840100	5922600	5385400	3951500	4436500	5122700	5176900	3423300	6649800	5448800	5245800	5553600
P18242	P18242;F8WIR1;A0A1B0GT66;F6Y6L6	Ctsd	Cathepsin D	sp|P18242|CATD_MOUSE Cathepsin D OS=Mus musculus OX=10090 GN=Ctsd PE=1 SV=1;tr|F8WIR1|F8WIR1_MOUSE Cathepsin D OS=Mus musculus OX=10090 GN=Ctsd PE=1 SV=2;tr|A0A1B0GT66|A0A1B0GT66_MOUSE Predicted gene, 49369 (Fragment) OS=Mus musculus OX=10090 GN=Gm49369 PE	6	25749000	7716700	7614400	7399600	4465500	7417300	9163600	5547000	5830600	6803700	7119000	4485300	4794300	170466	6536100	9435700	5068400	7005000	4881400	6768900	6624500	4893900	6276200	6513300	5868700	4978000	4024400	4800100	5682900	5356200	3268200	3691900
A0A0R4J131	A0A0R4J131;Q8CIF4	Btd	Biotinidase	tr|A0A0R4J131|A0A0R4J131_MOUSE Biotinidase OS=Mus musculus OX=10090 GN=Btd PE=1 SV=1;sp|Q8CIF4|BTD_MOUSE Biotinidase OS=Mus musculus OX=10090 GN=Btd PE=1 SV=2	16	92662000	94510000	89022000	84099000	70718000	66481000	94737000	48208000	71643000	66439000	71984000	52084000	75950000	46271000	54701000	80716000	80332000	80262000	46406000	80408000	67843000	66454000	44273000	44513000	37683000	29703000	37015000	25059000	57477000	44505000	41787000	42661000
Q8C7E4	Q8C7E4;Q9JJH1	Rnase4	Ribonuclease 4	tr|Q8C7E4|Q8C7E4_MOUSE Ribonuclease 4 OS=Mus musculus OX=10090 GN=Rnase4 PE=1 SV=1;sp|Q9JJH1|RNAS4_MOUSE Ribonuclease 4 OS=Mus musculus OX=10090 GN=Rnase4 PE=1 SV=1	4	19502000	16308000	15950000	8580700	12204000	14068000	12728000	11050000	15434000	14557000	17344000	6344900	15705000	16928000	13529000	9334200	9940000	11599000	10072000	13441000	11580000	6758700	10049000	3804000	12863000	6368600	14674000	7713100	11028000	9178400	8367700	8569600
Q61268	Q61268	Apoc4	Apolipoprotein C-IV	sp|Q61268|APOC4_MOUSE Apolipoprotein C-IV OS=Mus musculus OX=10090 GN=Apoc4 PE=1 SV=1	2	147550000	390070000	409900000	289100000	326530000	156760000	391090000	332290000	358570000	247720000	244110000	191790000	319180000	287820000	280460000	141170000	256350000	227680000	154980000	277830000	232920000	220380000	287240000	254180000	176020000	66291000	148490000	101870000	211630000	147650000	264600000	168320000
Q9DB76	Q9DB76	Emc9	ER membrane protein complex subunit 9	sp|Q9DB76|EMC9_MOUSE ER membrane protein complex subunit 9 OS=Mus musculus OX=10090 GN=Emc9 PE=1 SV=1	2	9602800	16616000	14815000	10498000	9586300	9082600	13080000	7822900	8955600	10310000	9571500	9889600	16130000	4042200	7849100	6701800	9798900	10189000	7249100	8396800	12925000	10943000	5614400	6382500	5616900	3546800	5900800	2267700	10976000	5565400	7227200	3762600
P16882-2	P16882-2;Q3UP14;P16882;E0CXS6	Ghr	Growth hormone receptor;Growth hormone-binding protein	sp|P16882-2|GHR_MOUSE Isoform 2 of Growth hormone receptor OS=Mus musculus OX=10090 GN=Ghr;tr|Q3UP14|Q3UP14_MOUSE Growth hormone receptor OS=Mus musculus OX=10090 GN=Ghr PE=1 SV=1;sp|P16882|GHR_MOUSE Growth hormone receptor OS=Mus musculus OX=10090 GN=Ghr	8	15005000	13890000	14030000	11946000	9165700	8557300	9461500	6576700	10936000	14896000	9328300	9559400	7956500	6883100	8496200	7481900	11059000	10873000	6119300	8859300	8027200	7176800	8351800	7433400	5245400	725090	6369700	4103600	9714100	7687800	6426900	7729400
Q01149	Q01149	Col1a2	Collagen alpha-2(I) chain	sp|Q01149|CO1A2_MOUSE Collagen alpha-2(I) chain OS=Mus musculus OX=10090 GN=Col1a2 PE=1 SV=2	7	9881000	13577000	14414000	7120600	17155000	19620000	14307000	8910500	7781200	7449600	23040000	15513000	9535500	17279000	17540000	15433000	9199700	13000000	7969300	9252500	10378000	10601000	11027000	12361000	4397800	6103400	7704600	7050100	13657000	12830000	8563500	9847500
F8WI14	F8WI14;D3Z772	Ecm1	Extracellular matrix protein 1	tr|F8WI14|F8WI14_MOUSE Extracellular matrix protein 1 OS=Mus musculus OX=10090 GN=Ecm1 PE=1 SV=1	24	190940000	171640000	108770000	112590000	119240000	125790000	146390000	138680000	170940000	187870000	85293000	66701000	103400000	113540000	103730000	100620000	105580000	128460000	58556000	77139000	148490000	56258000	88593000	62482000	129860000	113660000	83117000	55497000	70010000	69173000	71925000	120980000
P35917	P35917	Flt4	Vascular endothelial growth factor receptor 3	sp|P35917|VGFR3_MOUSE Vascular endothelial growth factor receptor 3 OS=Mus musculus OX=10090 GN=Flt4 PE=1 SV=1	19	31519000	36439000	33515000	30262000	31389000	33146000	32229000	24078000	30957000	32457000	32353000	26896000	34817000	34458000	28968000	30487000	28702000	30467000	19332000	22056000	24622000	28451000	19498000	19072000	16016000	11694000	20393000	13312000	27582000	28221000	22595000	22256000
Q91X17	Q91X17	Umod	Uromodulin;Uromodulin, secreted form	sp|Q91X17|UROM_MOUSE Uromodulin OS=Mus musculus OX=10090 GN=Umod PE=1 SV=1	3	10274000	9759900	14831000	9676300	8420900	10341000	14855000	9703000	10760000	11329000	9292500	7360500	13392000	11347000	7450300	11387000	11915000	8125700	5289500	8468300	7775600	7543300	7230000	5734700	5549600	6178100	6479200	3368800	8257400	11379000	8712700	7467300
O09159	O09159	Man2b1	Lysosomal alpha-mannosidase	sp|O09159|MA2B1_MOUSE Lysosomal alpha-mannosidase OS=Mus musculus OX=10090 GN=Man2b1 PE=1 SV=4	25	52203000	39085000	45903000	40646000	30650000	37197000	37193000	26907000	44562000	52993000	29923000	34892000	38742000	41974000	27681000	38842000	30759000	25522000	19949000	23731000	33611000	29205000	29216000	25334000	26532000	15073000	30837000	16968000	33682000	38669000	29490000	26226000
P41317	P41317	Mbl2	Mannose-binding protein C	sp|P41317|MBL2_MOUSE Mannose-binding protein C OS=Mus musculus OX=10090 GN=Mbl2 PE=1 SV=2	9	164590000	133310000	180840000	133160000	164250000	148910000	120300000	106800000	152230000	113160000	165680000	137180000	138190000	210510000	135150000	130770000	174920000	166550000	120620000	216880000	78843000	113660000	78509000	80644000	46139000	52866000	89094000	42119000	108050000	74909000	124780000	65037000
P33434	P33434;P33434-2;A0A1B0GS88	Mmp2	72 kDa type IV collagenase;PEX	sp|P33434|MMP2_MOUSE 72 kDa type IV collagenase OS=Mus musculus OX=10090 GN=Mmp2 PE=1 SV=1;sp|P33434-2|MMP2_MOUSE Isoform 2 of 72 kDa type IV collagenase OS=Mus musculus OX=10090 GN=Mmp2	14	20821000	12147000	15964000	10621000	13394000	19862000	14473000	9692800	9814500	7346100	14270000	11659000	15708000	14271000	13536000	21104000	12525000	12406000	7530600	9869100	11444000	7331900	10109000	10050000	8694100	9503500	10031000	6083300	9425400	10284000	10590000	10371000
Q9DC11	Q9DC11;B1AY85;B1AY86	Plxdc2	Plexin domain-containing protein 2	sp|Q9DC11|PXDC2_MOUSE Plexin domain-containing protein 2 OS=Mus musculus OX=10090 GN=Plxdc2 PE=1 SV=1;tr|B1AY85|B1AY85_MOUSE Plexin domain-containing protein 2 OS=Mus musculus OX=10090 GN=Plxdc2 PE=1 SV=1;tr|B1AY86|B1AY86_MOUSE Plexin domain-containing pro	6	13861000	14365000	14385000	10723000	9989100	14479000	13919000	9987600	12458000	14006000	13161000	10973000	12629000	13421000	10485000	12730000	8556400	10476000	6588900	8769200	9771500	11609000	9273200	7993500	7435500	6927800	6467900	5670200	9533100	11694000	9555900	9726100
Q9Z1R3	Q9Z1R3	Apom	Apolipoprotein M	sp|Q9Z1R3|APOM_MOUSE Apolipoprotein M OS=Mus musculus OX=10090 GN=Apom PE=1 SV=1	3	251990000	337140000	338390000	324770000	479910000	498740000	536050000	361770000	328760000	410990000	345630000	306540000	524290000	613120000	465160000	302760000	220780000	216350000	208030000	168890000	300460000	330520000	268100000	255090000	303460000	128290000	425730000	176080000	369680000	290080000	428810000	365080000
P29621	P29621	Serpina3c	Serine protease inhibitor A3C	sp|P29621|SPA3C_MOUSE Serine protease inhibitor A3C OS=Mus musculus OX=10090 GN=Serpina3c PE=2 SV=1	5	17147000	13870000	16659000	12236000	14292000	15906000	18062000	11618000	12967000	14697000	13883000	11594000	14859000	21815000	14988000	16751000	10594000	13909000	8721900	10089000	12101000	11977000	8146400	9413000	7140500	8398200	12068000	4391400	11216000	12005000	14335000	12367000
Q09200	Q09200;A0A1W2P6F0	B4galnt1	Beta-1,4 N-acetylgalactosaminyltransferase 1	sp|Q09200|B4GN1_MOUSE Beta-1,4 N-acetylgalactosaminyltransferase 1 OS=Mus musculus OX=10090 GN=B4galnt1 PE=1 SV=1;tr|A0A1W2P6F0|A0A1W2P6F0_MOUSE Beta-1,4 N-acetylgalactosaminyltransferase 1 OS=Mus musculus OX=10090 GN=B4galnt1 PE=1 SV=1	4	6406400	4440500	5261300	4290500	2752400	5493000	3841000	3284000	3049400	4260800	4838200	3617500	3496700	4704700	2720300	3567600	2963200	4264700	2548100	2630600	3688400	2995000	2844200	2300300	2707500	1817400	2889400	2172400	2380000	3271200	2947500	3219000
P26645	P26645	Marcks	Myristoylated alanine-rich C-kinase substrate	sp|P26645|MARCS_MOUSE Myristoylated alanine-rich C-kinase substrate OS=Mus musculus OX=10090 GN=Marcks PE=1 SV=2	2	1210100	1129300	1181400	1052700	1412800	1879500	1259100	780940	1093800	830520	938980	991580	1225200	1111500	1438600	1083700	1219100	1115600	830320	1070800	908480	820160	640710	685490	435800	441020	969470	507140	804010	818840	744060	849220
P08228	P08228	Sod1	Superoxide dismutase [Cu-Zn]	sp|P08228|SODC_MOUSE Superoxide dismutase [Cu-Zn] OS=Mus musculus OX=10090 GN=Sod1 PE=1 SV=2	5	7049000	5380400	6525000	7188200	6094300	9877900	8450300	4223300	4777200	3474100	11809000	27410000	8223800	6216000	3397200	10702000	10568000	7020200	5789800	3512200	4310200	10279000	4382500	10522000	1346500	1100000	4138400	8219400	6358000	7458100	2666500	2498000
A0A0G2JE26	A0A0G2JE26;Q6DFX2	Antxr2	Anthrax toxin receptor 2	tr|A0A0G2JE26|A0A0G2JE26_MOUSE Anthrax toxin receptor OS=Mus musculus OX=10090 GN=Antxr2 PE=1 SV=1;sp|Q6DFX2|ANTR2_MOUSE Anthrax toxin receptor 2 OS=Mus musculus OX=10090 GN=Antxr2 PE=1 SV=1	11	6886200	7805200	8658500	7468000	6713500	7233800	8084000	5594900	7602900	6578400	8152700	6332900	8988300	8517200	6231400	7465700	5254200	6666100	4197200	4954600	7764000	7289500	3489600	3613000	2513700	2825800	5626300	2104300	5749300	6670300	7053200	5761100
Q8C255	Q8C255;A0A2K6EDK8;Q8C255-3;Q8C255-2	Dpep2	Dipeptidase 2	sp|Q8C255|DPEP2_MOUSE Dipeptidase 2 OS=Mus musculus OX=10090 GN=Dpep2 PE=1 SV=1;tr|A0A2K6EDK8|A0A2K6EDK8_MOUSE Dipeptidase (Fragment) OS=Mus musculus OX=10090 GN=Dpep2 PE=1 SV=1;sp|Q8C255-3|DPEP2_MOUSE Isoform 3 of Dipeptidase 2 OS=Mus musculus OX=10090 GN	13	25273000	20754000	17789000	13676000	13378000	21464000	15197000	11174000	15615000	13286000	14986000	10594000	16499000	18636000	13077000	18917000	14473000	16548000	9658900	12476000	13124000	14860000	11386000	11925000	7227000	8250000	11867000	4648000	12317000	11886000	10145000	8498200
Q9Z2U1	Q9Z2U1	Psma5	Proteasome subunit alpha type-5	sp|Q9Z2U1|PSA5_MOUSE Proteasome subunit alpha type-5 OS=Mus musculus OX=10090 GN=Psma5 PE=1 SV=1	8	27550000	19971000	19954000	13871000	20834000	30299000	19080000	14160000	16188000	12696000	15613000	14366000	16003000	13237000	10547000	21156000	16481000	15979000	10058000	13130000	13876000	15787000	4563400	12842000	12223000	12694000	10131000	9536100	13726000	14484000	9648600	10916000
Q8R2Y2-2	Q8R2Y2-2;Q8R2Y2;A0A1L1SQC5;F7ATH5	Mcam	Cell surface glycoprotein MUC18	sp|Q8R2Y2-2|MUC18_MOUSE Isoform 2 of Cell surface glycoprotein MUC18 OS=Mus musculus OX=10090 GN=Mcam;sp|Q8R2Y2|MUC18_MOUSE Cell surface glycoprotein MUC18 OS=Mus musculus OX=10090 GN=Mcam PE=1 SV=1	6	14036000	7643800	8996600	5174700	6027400	9273300	6938900	4347900	5653100	6915500	9285900	6113100	6093100	7123800	6424200	6074800	6887900	8902400	4724400	6168200	4771400	5370800	4902900	3732200	2297400	3844600	5127800	2292000	5320900	5942200	5052600	4342200
Q64727	Q64727	Vcl	Vinculin	sp|Q64727|VINC_MOUSE Vinculin OS=Mus musculus OX=10090 GN=Vcl PE=1 SV=4	19	10665000	7313100	8592900	7200200	7356000	13204000	8096200	7053600	5151000	5055600	7574600	6761000	6040400	6231300	5334400	10479000	6294600	6505400	5623000	6146400	5692500	5615900	5338400	4364500	4652000	5644900	4935900	4324600	5077000	4906600	4243300	4355200
P16301	P16301	Lcat	Phosphatidylcholine-sterol acyltransferase	sp|P16301|LCAT_MOUSE Phosphatidylcholine-sterol acyltransferase OS=Mus musculus OX=10090 GN=Lcat PE=1 SV=2	19	557130000	371560000	375540000	346060000	415200000	507530000	400380000	352220000	326180000	337560000	412300000	305300000	389930000	405560000	363580000	519290000	278990000	335340000	225110000	300970000	284440000	288010000	259470000	239890000	288720000	288700000	300360000	217710000	287810000	258180000	266470000	254600000
Q9R1P3	Q9R1P3	Psmb2	Proteasome subunit beta type-2	sp|Q9R1P3|PSB2_MOUSE Proteasome subunit beta type-2 OS=Mus musculus OX=10090 GN=Psmb2 PE=1 SV=1	5	29968000	18425000	21042000	18082000	21008000	37674000	19969000	14490000	11938000	11588000	20843000	15459000	19694000	15898000	12807000	21262000	18018000	15766000	11766000	15690000	12648000	15635000	4483700	14256000	13317000	13092000	14115000	8418000	14350000	18333000	13039000	9380500
O70435	O70435;E0CZ34;F8WH02;E0CYL6;E0CX62	Psma3	Proteasome subunit alpha type-3	sp|O70435|PSA3_MOUSE Proteasome subunit alpha type-3 OS=Mus musculus OX=10090 GN=Psma3 PE=1 SV=3	6	25746000	19038000	14725000	11826000	15739000	30533000	16281000	11641000	13420000	9959400	14145000	12560000	15533000	12201000	9172800	15712000	14267000	13316000	7966700	10703000	10730000	13321000	4444100	10917000	13529000	11587000	10007000	8505000	11951000	13218000	7583700	7552500
Q9DBJ1	Q9DBJ1;O70250	Pgam1;Pgam2	Phosphoglycerate mutase 1;Phosphoglycerate mutase 2	sp|Q9DBJ1|PGAM1_MOUSE Phosphoglycerate mutase 1 OS=Mus musculus OX=10090 GN=Pgam1 PE=1 SV=3;sp|O70250|PGAM2_MOUSE Phosphoglycerate mutase 2 OS=Mus musculus OX=10090 GN=Pgam2 PE=1 SV=3	4	10642000	7951800	8067400	6489800	7607300	13286000	5995900	4055200	4443800	4069300	7904300	11635000	7050800	7544600	6277600	8066300	6861700	4681200	6265300	5520000	3646000	6525200	3993700	5994500	3722000	3668500	5488800	4520700	5914200	7075000	5014700	3711300
P99026	P99026	Psmb4	Proteasome subunit beta type-4	sp|P99026|PSB4_MOUSE Proteasome subunit beta type-4 OS=Mus musculus OX=10090 GN=Psmb4 PE=1 SV=1	7	32486000	19378000	19814000	12861000	17880000	26531000	16171000	12290000	14540000	12818000	13508000	10654000	17703000	13051000	9802000	21359000	15011000	14163000	9002000	12060000	13446000	13927000	4931500	12675000	13814000	14151000	8455200	9937300	11339000	11900000	10535000	9335900
A2AFG7	A2AFG7;A2AFG8;Q6PGJ3;P11627;F7A5H7;B7ZCD3;F6UIL7	L1cam	Neural cell adhesion molecule L1	tr|A2AFG7|A2AFG7_MOUSE Neural cell adhesion molecule L1 OS=Mus musculus OX=10090 GN=L1cam PE=1 SV=1;tr|A2AFG8|A2AFG8_MOUSE Neural cell adhesion molecule L1 OS=Mus musculus OX=10090 GN=L1cam PE=1 SV=1;tr|Q6PGJ3|Q6PGJ3_MOUSE L1 cell adhesion molecule OS=Mus	12	109580000	79861000	87849000	75237000	66598000	112230000	90957000	47225000	70331000	61684000	86919000	61784000	66674000	85448000	52226000	109750000	59999000	63013000	44179000	61202000	60587000	78334000	46129000	48443000	38787000	52116000	46375000	40143000	48466000	75081000	48658000	50016000
P14152	P14152;A0A5F8MPN8;B1ATQ3	Mdh1	Malate dehydrogenase, cytoplasmic	sp|P14152|MDHC_MOUSE Malate dehydrogenase, cytoplasmic OS=Mus musculus OX=10090 GN=Mdh1 PE=1 SV=3;tr|A0A5F8MPN8|A0A5F8MPN8_MOUSE Malate dehydrogenase OS=Mus musculus OX=10090 GN=Mdh1 PE=1 SV=1	8	20341000	9890300	17748000	10263000	13549000	24291000	7694600	6151800	8176500	3006400	23783000	39028000	17464000	21773000	14116000	18927000	19189000	4422600	15638000	4510400	7671600	21508000	5891900	14473000	2897200	2342700	11219000	14882000	10941000	22807000	12135000	3990900
Q60805	Q60805	Mertk	Tyrosine-protein kinase Mer	sp|Q60805|MERTK_MOUSE Tyrosine-protein kinase Mer OS=Mus musculus OX=10090 GN=Mertk PE=1 SV=1	7	21168000	15073000	16331000	14778000	14820000	16272000	15652000	12166000	14560000	14143000	16401000	13127000	16568000	20768000	12673000	14827000	13237000	13346000	9572000	10210000	13273000	13081000	9963600	9893400	8673900	8403700	9902600	6898500	10699000	11446000	11467000	9198900
Q9Z1T2	Q9Z1T2	Thbs4	Thrombospondin-4	sp|Q9Z1T2|TSP4_MOUSE Thrombospondin-4 OS=Mus musculus OX=10090 GN=Thbs4 PE=1 SV=1	14	36166000	20971000	20471000	17563000	18635000	29450000	20101000	15099000	22536000	14208000	22557000	15503000	19012000	18365000	23071000	32399000	17531000	15723000	11323000	14088000	18897000	15631000	15169000	13646000	16834000	12223000	10377000	11379000	16511000	14225000	15223000	16085000
P08905	P08905;P17897	Lyz2;Lyz1	Lysozyme C-2;Lysozyme C-1	sp|P08905|LYZ2_MOUSE Lysozyme C-2 OS=Mus musculus OX=10090 GN=Lyz2 PE=1 SV=2;sp|P17897|LYZ1_MOUSE Lysozyme C-1 OS=Mus musculus OX=10090 GN=Lyz1 PE=1 SV=1	2	13027000	9707200	12695000	8659700	9993100	9994900	10401000	4694300	9758400	9162400	31148000	10387000	13815000	13395000	7301800	8968500	12236000	9797300	10901000	5534800	516736	21643000	283782	6377300	7741600	6009300	10301000	5759300	12192000	13896000	458622	352503
A2APM2	A2APM2;A2APM4;A2APM1;Q3U8S1;E9QKM8;Q80X37;A2APM3;A2APM5;P15379-6;P15379-11;P15379-5;P15379-3;P15379-12;P15379-13;P15379-10;P15379-9;P15379-4;P15379-8;P15379-7;P15379;P15379-2	Cd44	CD44 antigen	tr|A2APM2|A2APM2_MOUSE CD44 antigen OS=Mus musculus OX=10090 GN=Cd44 PE=1 SV=1;tr|A2APM4|A2APM4_MOUSE CD44 antigen OS=Mus musculus OX=10090 GN=Cd44 PE=1 SV=1;tr|A2APM1|A2APM1_MOUSE CD44 antigen OS=Mus musculus OX=10090 GN=Cd44 PE=1 SV=1;tr|Q3U8S1|Q3U8S1_MO	2	78540000	42791000	49034000	41540000	40872000	79997000	45862000	30836000	35004000	36182000	47970000	34674000	45994000	47093000	30671000	57290000	40790000	37136000	25313000	29360000	34750000	34773000	32577000	32305000	26554000	28669000	33774000	21262000	33876000	35637000	28707000	26231000
P49722	P49722;Q8BKE0	Psma2	Proteasome subunit alpha type-2	sp|P49722|PSA2_MOUSE Proteasome subunit alpha type-2 OS=Mus musculus OX=10090 GN=Psma2 PE=1 SV=3;tr|Q8BKE0|Q8BKE0_MOUSE Proteasome endopeptidase complex (Fragment) OS=Mus musculus OX=10090 GN=Psma2 PE=1 SV=1	7	15743000	9798600	11683000	8368100	10302000	20218000	11492000	8295200	7143100	7982100	9582500	8907300	8683600	9954900	6860700	14339000	9016800	8723500	6668500	8280300	8361000	9330900	283782	7844400	7008100	7731200	6376500	6493400	5963700	9920500	6709800	4973900
O55234	O55234;Q8BTY5	Psmb5	Proteasome subunit beta type-5	sp|O55234|PSB5_MOUSE Proteasome subunit beta type-5 OS=Mus musculus OX=10090 GN=Psmb5 PE=1 SV=3;tr|Q8BTY5|Q8BTY5_MOUSE Proteasome subunit beta type-5 OS=Mus musculus OX=10090 GN=Psmb5 PE=1 SV=1	6	5144600	3901000	4233100	3399200	4493500	8912100	3149200	2958200	2131600	3165700	2664600	5443700	3627600	2810300	1686800	3237800	3429000	3124200	2335300	2721500	3779000	2855200	283782	2576000	2834400	2553100	2243700	1632800	2865300	2661500	2482800	2505900
P97449	P97449;A0A0U1RNS3	Anpep	Aminopeptidase N	sp|P97449|AMPN_MOUSE Aminopeptidase N OS=Mus musculus OX=10090 GN=Anpep PE=1 SV=4	20	24165000	18075000	20573000	19941000	15094000	15141000	17370000	12052000	13509000	12851000	15039000	12973000	16676000	14587000	11426000	20725000	15793000	16221000	11726000	14856000	12245000	13222000	10848000	12181000	6695000	7211400	8328800	6968600	12451000	8650100	7826500	9143300
Q61247	Q61247;Q5ND35;E9PXE0	Serpinf2	Alpha-2-antiplasmin	sp|Q61247|A2AP_MOUSE Alpha-2-antiplasmin OS=Mus musculus OX=10090 GN=Serpinf2 PE=1 SV=1;tr|Q5ND35|Q5ND35_MOUSE Alpha-2-antiplasmin (Fragment) OS=Mus musculus OX=10090 GN=Serpinf2 PE=1 SV=1	16	2070500000	1490400000	1572300000	1389900000	1404800000	1685400000	1516800000	1135900000	1347300000	1346100000	1406400000	1072000000	1406100000	1333600000	1205800000	1419400000	1118700000	1184800000	745500000	979510000	1223600000	981390000	901870000	911150000	905130000	758940000	891260000	658330000	1023300000	1023600000	982040000	981120000
Q9R1P4	Q9R1P4;A0A1B0GS70	Psma1	Proteasome subunit alpha type-1	sp|Q9R1P4|PSA1_MOUSE Proteasome subunit alpha type-1 OS=Mus musculus OX=10090 GN=Psma1 PE=1 SV=1;tr|A0A1B0GS70|A0A1B0GS70_MOUSE Proteasome endopeptidase complex OS=Mus musculus OX=10090 GN=Psma1 PE=1 SV=1	10	25772000	18676000	13653000	11515000	14259000	26780000	13170000	10652000	12253000	9885200	13139000	11464000	10016000	16483000	7014600	18748000	10364000	11685000	8176300	11481000	12567000	12280000	1802700	10743000	11233000	10576000	7937000	8669500	10397000	12590000	7623800	7264800
A0A1W2P6Q2	A0A1W2P6Q2;Q9JHJ8;Q9JHJ8-2	Icoslg	ICOS ligand	tr|A0A1W2P6Q2|A0A1W2P6Q2_MOUSE Icos ligand (Fragment) OS=Mus musculus OX=10090 GN=Icosl PE=1 SV=1;sp|Q9JHJ8|ICOSL_MOUSE ICOS ligand OS=Mus musculus OX=10090 GN=Icoslg PE=1 SV=1;sp|Q9JHJ8-2|ICOSL_MOUSE Isoform 2 of ICOS ligand OS=Mus musculus OX=10090 GN=Ic	4	27676000	13219000	14570000	14217000	13412000	14210000	17821000	10995000	7801600	12183000	15975000	13711000	14590000	8888100	11980000	14820000	13332000	14548000	8681500	8801200	9874100	10942000	8799500	9430900	6271000	8690100	8083200	5279000	8575900	10653000	7547400	10878000
Q9DC42	Q9DC42;A0A0D9SEG8;E9QMJ5;E9QJS7;Q9Z0M6-2;Q9Z0M6-3;Q9Z0M6	Adgre5;Cd97	CD97 antigen	tr|Q9DC42|Q9DC42_MOUSE Adhesion G protein-coupled receptor E5 OS=Mus musculus OX=10090 GN=Adgre5 PE=1 SV=1;tr|A0A0D9SEG8|A0A0D9SEG8_MOUSE Adhesion G protein-coupled receptor E5 OS=Mus musculus OX=10090 GN=Adgre5 PE=1 SV=1;tr|E9QMJ5|E9QMJ5_MOUSE Adhesion G	7	7819300	6488000	8824100	6672500	8816100	7018400	8628700	6381100	6957100	6735900	12341000	5886000	6111400	8546800	7018600	7492200	5383200	6677100	4071200	5579200	7180000	6517700	5586800	3869100	5045400	2720400	4312900	3117900	5539400	6362200	5208200	3647000
O09061	O09061;A0A338P7C0;A0A338P7F1	Psmb1	Proteasome subunit beta type-1	sp|O09061|PSB1_MOUSE Proteasome subunit beta type-1 OS=Mus musculus OX=10090 GN=Psmb1 PE=1 SV=1;tr|A0A338P7C0|A0A338P7C0_MOUSE Proteasome endopeptidase complex OS=Mus musculus OX=10090 GN=Psmb1 PE=1 SV=1;tr|A0A338P7F1|A0A338P7F1_MOUSE Proteasome subunit be	6	17656000	12852000	10688000	8065800	11621000	15698000	12534000	7585200	8287300	5706200	9171300	6002800	8874500	7125800	5400200	15647000	9338300	10152000	5076800	8022400	9068900	8990200	2551700	8430200	6575300	9167700	4719100	4498600	7029900	6826400	3803800	3899800
P13597-2	P13597-2;P13597	Icam1	Intercellular adhesion molecule 1	sp|P13597-2|ICAM1_MOUSE Isoform 2 of Intercellular adhesion molecule 1 OS=Mus musculus OX=10090 GN=Icam1;sp|P13597|ICAM1_MOUSE Intercellular adhesion molecule 1 OS=Mus musculus OX=10090 GN=Icam1 PE=1 SV=1	8	31081000	19869000	22912000	17891000	17737000	23461000	19065000	14968000	13854000	15138000	20499000	13437000	19002000	21357000	15144000	18252000	15147000	17136000	11604000	13632000	12831000	15068000	12202000	10779000	11470000	10504000	13582000	6750000	12065000	15086000	12720000	10691000
G5E8M9	G5E8M9;P35330;G3UWJ5;B1ARJ2	Icam2	Intercellular adhesion molecule 2	tr|G5E8M9|G5E8M9_MOUSE Intercellular adhesion molecule 2 (Fragment) OS=Mus musculus OX=10090 GN=Icam2 PE=1 SV=1;sp|P35330|ICAM2_MOUSE Intercellular adhesion molecule 2 OS=Mus musculus OX=10090 GN=Icam2 PE=1 SV=1;tr|G3UWJ5|G3UWJ5_MOUSE Intercellular adhesio	3	7278700	3662400	4481900	3452200	3303200	6987200	6036900	3085800	4266500	4507200	4109000	3572100	3626600	5874500	2744900	3954600	3833900	5158800	2236800	2698500	3505200	3851400	2066600	3245100	2135600	2083000	2753200	1688400	2996300	3733900	2970300	2035700
Q8CF98	Q8CF98	Colec10	Collectin-10	sp|Q8CF98|COL10_MOUSE Collectin-10 OS=Mus musculus OX=10090 GN=Colec10 PE=2 SV=1	3	9084000	13369000	9575200	9375000	7398000	7524600	7013000	7066300	8651300	5614900	6074300	4407400	6411500	5656200	4141300	4880800	7899900	7921300	5590200	4478100	6400800	5831100	6457500	4717000	4967600	2607900	5030900	264280	218026	3504900	5117000	5967400
V9GXT4	V9GXT4;V9GXA2;V9GX00;Q00560;V9GX52	Il6st	Interleukin-6 receptor subunit beta	tr|V9GXT4|V9GXT4_MOUSE Interleukin-6 receptor subunit beta OS=Mus musculus OX=10090 GN=Il6st PE=1 SV=1;tr|V9GXA2|V9GXA2_MOUSE Interleukin-6 receptor subunit beta OS=Mus musculus OX=10090 GN=Il6st PE=1 SV=1;tr|V9GX00|V9GX00_MOUSE Interleukin-6 receptor subu	4	6579200	4239400	4686800	4457100	4571600	6853400	5682500	3893700	4294300	4231600	5898000	4443700	3684200	6450500	3607200	5879200	3581200	3663400	3584800	3149700	4393200	4175200	3204700	3007700	1904500	2403400	3646400	2051300	2684600	4016400	3751200	3270300
Q00519	Q00519;A0A3B2WBF8;A0A3B2W454;A0A3B2WDA8	Xdh	Xanthine dehydrogenase/oxidase;Xanthine dehydrogenase;Xanthine oxidase	sp|Q00519|XDH_MOUSE Xanthine dehydrogenase/oxidase OS=Mus musculus OX=10090 GN=Xdh PE=1 SV=5	18	21190000	15049000	17015000	12941000	13232000	22012000	13316000	9326000	9489000	10704000	13715000	11153000	11345000	14076000	10564000	14104000	9083300	10069000	8635200	9404900	8746100	11233000	8718500	8108200	10797000	9355600	9909700	7338800	8093200	9511300	7877400	7907100
O08689	O08689	Mstn	Growth/differentiation factor 8	sp|O08689|GDF8_MOUSE Growth/differentiation factor 8 OS=Mus musculus OX=10090 GN=Mstn PE=1 SV=1	4	3191900	1370100	1059400	1168300	1630900	1893100	2556700	1749800	2510100	1223100	1064500	781770	1648500	993030	1632500	4315400	1059100	1023600	783450	891510	2224500	381070	739820	1078200	1760400	2106400	1006300	438080	960270	1485600	836260	2138700
Q9Z2U0	Q9Z2U0;A0A338P7D7;B7ZMS4;Q9CWH6;A0A3Q4L361;A0A3Q4EHS3;A0A3Q4EG42	Psma7	Proteasome subunit alpha type-7	sp|Q9Z2U0|PSA7_MOUSE Proteasome subunit alpha type-7 OS=Mus musculus OX=10090 GN=Psma7 PE=1 SV=1;tr|A0A338P7D7|A0A338P7D7_MOUSE Proteasome subunit alpha type OS=Mus musculus OX=10090 GN=Psma7 PE=1 SV=1	9	37006000	24987000	25019000	18772000	26971000	44182000	25930000	19459000	19285000	17682000	23993000	20038000	20363000	21019000	17361000	29418000	21507000	17632000	15971000	16374000	17107000	20925000	6347600	14952000	15347000	16991000	16538000	11614000	18302000	19059000	14531000	13543000
Q3UER8	Q3UER8;Q8VCM7	Fgg	Fibrinogen gamma chain	tr|Q3UER8|Q3UER8_MOUSE Fibrinogen gamma chain OS=Mus musculus OX=10090 GN=Fgg PE=1 SV=1;sp|Q8VCM7|FIBG_MOUSE Fibrinogen gamma chain OS=Mus musculus OX=10090 GN=Fgg PE=1 SV=1	31	1014500000	6838800000	2441900	949180000	192520	312961	841670000	3119000000	3496000000	8802400000	63369	62134	31490000	110570	102460000	579184	11957000	1003700000	45574	140630	4275200000	9385.6	116880000	118480	3973800000	3162800000	49836	48253	45494	62368	195390000	3781300000
Q01853	Q01853	Vcp	Transitional endoplasmic reticulum ATPase	sp|Q01853|TERA_MOUSE Transitional endoplasmic reticulum ATPase OS=Mus musculus OX=10090 GN=Vcp PE=1 SV=4	7	2233200	1582500	1345300	3329300	2693200	6347700	9269800	3487200	627130	1389600	19731000	20535000	1727300	1872200	1458500	4100900	2073500	1957500	6783700	1259300	935900	9708800	1538300	10994000	532040	243892	825990	4245600	2527600	6915300	1350200	1351700
Q9R097	Q9R097	Spint1	Kunitz-type protease inhibitor 1	sp|Q9R097|SPIT1_MOUSE Kunitz-type protease inhibitor 1 OS=Mus musculus OX=10090 GN=Spint1 PE=1 SV=2	4	6530900	2853200	3205900	3375300	2699200	7053100	4486100	2711100	2936500	2434200	6042100	2911800	3505700	6438000	4865100	2675700	4321300	3511300	2013100	1729000	3091800	3081100	2413700	228502	2123200	2934700	3521100	2046700	3630500	4140900	458622	2500000
Q9R1P0	Q9R1P0;E9PW69;E9Q0X0	Psma4	Proteasome subunit alpha type-4;Proteasome subunit alpha type	sp|Q9R1P0|PSA4_MOUSE Proteasome subunit alpha type-4 OS=Mus musculus OX=10090 GN=Psma4 PE=1 SV=1;tr|E9PW69|E9PW69_MOUSE Proteasome subunit alpha type (Fragment) OS=Mus musculus OX=10090 GN=Psma4 PE=1 SV=1	8	30006000	19562000	17341000	13095000	19019000	37205000	17968000	13448000	11078000	12700000	16901000	6677400	13812000	17112000	10960000	18609000	16364000	11994000	9528300	13356000	14571000	12523000	4102100	10216000	11247000	11238000	12348000	9115900	11571000	13873000	9164700	6203000
P63260	P63260;B1ATY1;G3UYG0;E9Q606	Actg1	Actin, cytoplasmic 2;Actin, cytoplasmic 2, N-terminally processed	sp|P63260|ACTG_MOUSE Actin, cytoplasmic 2 OS=Mus musculus OX=10090 GN=Actg1 PE=1 SV=1	17	317410000	232850000	269630000	175270000	238140000	350490000	238720000	191180000	182970000	154530000	234530000	161220000	216450000	199700000	161050000	285360000	174140000	177240000	140830000	157590000	164560000	172340000	155360000	132350000	133810000	127880000	122520000	110740000	157620000	165310000	106990000	124830000
P09581	P09581;A0A494BBK8;A0A494BA23	Csf1r	Macrophage colony-stimulating factor 1 receptor	sp|P09581|CSF1R_MOUSE Macrophage colony-stimulating factor 1 receptor OS=Mus musculus OX=10090 GN=Csf1r PE=1 SV=3	14	440550000	330960000	369300000	281720000	244940000	290350000	271610000	231950000	227190000	234150000	312910000	183230000	319070000	332800000	231970000	262340000	219630000	254440000	156000000	205780000	192200000	251090000	201970000	171960000	123010000	129470000	190870000	123050000	206810000	176980000	190930000	142590000
Q61233	Q61233;D3YZ25;D3YVW8;D3Z7D9;D3Z311;A0A1C7CYV0;B1AX58;Q99K51;Q3V0K9	Lcp1	Plastin-2	sp|Q61233|PLSL_MOUSE Plastin-2 OS=Mus musculus OX=10090 GN=Lcp1 PE=1 SV=4	23	21996000	15651000	16395000	11590000	12088000	19404000	13162000	9429300	11330000	10801000	13272000	10252000	11745000	11870000	10004000	15553000	12417000	11333000	8415700	9888500	8642000	9774400	9202100	9054100	7030300	6819800	7768300	5661800	9064800	9044100	7461600	6161100
A0A571BF69	A0A571BF69;B5THE2;A0A0J9YVE6;A0A0J9YVJ0;Q6XK23;A0A571BDS5;F8VQM5	Mgam	Maltase-glucoamylase	tr|A0A571BF69|A0A571BF69_MOUSE Maltase-glucoamylase OS=Mus musculus OX=10090 GN=Mgam PE=1 SV=1;tr|B5THE2|B5THE2_MOUSE Maltase-glucoamylase OS=Mus musculus OX=10090 GN=Mgam PE=1 SV=1	97	255160000	224540000	278430000	225950000	190290000	194940000	229840000	145940000	229330000	225860000	212560000	178590000	231360000	254340000	148270000	187160000	203830000	214500000	145250000	154080000	158970000	174610000	113950000	112520000	64916000	74704000	137300000	72454000	143320000	146640000	144650000	127660000
Q8BH61	Q8BH61	F13a1	Coagulation factor XIII A chain	sp|Q8BH61|F13A_MOUSE Coagulation factor XIII A chain OS=Mus musculus OX=10090 GN=F13a1 PE=1 SV=3	29	149990000	155230000	122380000	125840000	140430000	121090000	218510000	159250000	222030000	181330000	33549000	43057000	229240000	147970000	164450000	117150000	107760000	141030000	35429000	63389000	216920000	37991000	83636000	69555000	93454000	110350000	81278000	22327000	81644000	72362000	112170000	163510000
P17182	P17182;Q6PHC1;B0QZL1;B1ARR7;A0A0N4SUI6;B1ARR6;D3YVD3;D3Z2S4;D3Z6E4;A0A0N4SUX5;P17183	Eno1	Alpha-enolase	sp|P17182|ENOA_MOUSE Alpha-enolase OS=Mus musculus OX=10090 GN=Eno1 PE=1 SV=3;tr|Q6PHC1|Q6PHC1_MOUSE 2-phospho-D-glycerate hydro-lyase OS=Mus musculus OX=10090 GN=Eno1 PE=1 SV=1	7	10750000	6989300	10009000	6191700	6336200	7321200	5986200	4488800	5533300	6077000	13215000	23371000	6906900	7395600	5566400	8197600	8254300	5215500	7140800	3788800	5225000	10101000	4459300	7591100	3244100	3566400	4595000	6884900	4025300	7714900	3850100	352503
P63017	P63017;Q504P4;P17156;D3Z5E2;P16627;Q61696;P17879	Hspa8	Heat shock cognate 71 kDa protein	sp|P63017|HSP7C_MOUSE Heat shock cognate 71 kDa protein OS=Mus musculus OX=10090 GN=Hspa8 PE=1 SV=1;tr|Q504P4|Q504P4_MOUSE Heat shock cognate 71 kDa protein OS=Mus musculus OX=10090 GN=Hspa8 PE=1 SV=1	12	13100000	9901600	12910000	9981300	10473000	18538000	11992000	6845500	6968800	5308800	12869000	12411000	11356000	9866900	8007800	11950000	8997300	9622000	5826000	5929600	6438600	10236000	6905200	8536700	5174400	4606500	6870200	6235800	6937200	7322200	6603600	3961500
Q8K1I3	Q8K1I3;A0A087WSF3;H3BLP2	Spp2	Secreted phosphoprotein 24	sp|Q8K1I3|SPP24_MOUSE Secreted phosphoprotein 24 OS=Mus musculus OX=10090 GN=Spp2 PE=1 SV=2	4	106520000	124380000	99729000	96832000	107900000	78887000	69274000	63774000	86348000	100670000	69530000	69553000	109130000	96135000	69490000	68343000	65136000	72078000	57371000	57715000	81502000	61148000	55854000	56165000	44410000	33047000	63905000	43189000	61747000	55398000	44539000	49413000
P27046	P27046	Man2a1	Alpha-mannosidase 2	sp|P27046|MA2A1_MOUSE Alpha-mannosidase 2 OS=Mus musculus OX=10090 GN=Man2a1 PE=1 SV=2	5	3815500	2986600	4083800	2659600	2174400	4308200	2605500	1413900	1254100	3167200	2726800	2270900	2058800	2356000	2349400	2155600	2630400	2006900	2481700	2225300	1538300	2198400	2011900	2157200	1343000	1129800	1927700	264280	218026	2122800	1381000	1352400
Q9R1P1	Q9R1P1	Psmb3	Proteasome subunit beta type-3	sp|Q9R1P1|PSB3_MOUSE Proteasome subunit beta type-3 OS=Mus musculus OX=10090 GN=Psmb3 PE=1 SV=1	4	40609000	26777000	24669000	18703000	23387000	45936000	23495000	19795000	17894000	18357000	21736000	16032000	24189000	25370000	14203000	26232000	19080000	22729000	12574000	16497000	18163000	22483000	4588600	14559000	16631000	18165000	9417400	11395000	16186000	19308000	13430000	11342000
Q9QXD6	Q9QXD6;F6YS63	Fbp1	Fructose-1,6-bisphosphatase 1	sp|Q9QXD6|F16P1_MOUSE Fructose-1,6-bisphosphatase 1 OS=Mus musculus OX=10090 GN=Fbp1 PE=1 SV=3	5	56727000	26415000	50166000	21021000	30342000	24442000	35000000	27962000	27850000	34687000	35757000	72152000	34950000	39841000	31659000	19250000	24535000	27839000	24388000	25771000	25291000	28894000	17684000	20149000	14234000	8082600	24283000	12236000	32272000	25870000	24780000	23009000
Q3TSR0	Q3TSR0;Q9ES89	Extl2	Exostosin-like 2	tr|Q3TSR0|Q3TSR0_MOUSE Exostosin-like 2 OS=Mus musculus OX=10090 GN=Extl2 PE=1 SV=1;sp|Q9ES89|EXTL2_MOUSE Exostosin-like 2 OS=Mus musculus OX=10090 GN=Extl2 PE=1 SV=1	4	10096000	8424100	11503000	5409500	6084800	4275700	11657000	5896500	10029000	4735000	5821200	2440800	12565000	2447400	4616200	5169300	6520200	8635500	2675500	331010	6224200	8148600	4217400	4946400	3359300	2880000	3873900	1714800	5295800	3929300	3489100	3893400
E9Q589	E9Q589;A0A0A6YY47;E9QB01;P13595-3;P13595-2;P13595;A0A0A6YWU2;A0A0A6YY91;P13595-4	Ncam1	Neural cell adhesion molecule 1	tr|E9Q589|E9Q589_MOUSE Neural cell adhesion molecule 1 OS=Mus musculus OX=10090 GN=Ncam1 PE=1 SV=1;tr|A0A0A6YY47|A0A0A6YY47_MOUSE Neural cell adhesion molecule 1 OS=Mus musculus OX=10090 GN=Ncam1 PE=1 SV=1;tr|E9QB01|E9QB01_MOUSE Neural cell adhesion molecu	15	20573000	11934000	14474000	12852000	14064000	21572000	15714000	11470000	13680000	10808000	14571000	12668000	15575000	15256000	11750000	17609000	11530000	10640000	8126000	8666500	10215000	11070000	7589000	8656700	8042600	8547500	8514600	6326300	8722100	12686000	9959000	8596800
F6WR04	F6WR04;O70370	Ctss	Cathepsin S	tr|F6WR04|F6WR04_MOUSE Cathepsin S OS=Mus musculus OX=10090 GN=Ctss PE=1 SV=1;sp|O70370|CATS_MOUSE Cathepsin S OS=Mus musculus OX=10090 GN=Ctss PE=1 SV=2	8	93336000	43990000	50903000	42388000	35396000	60415000	39434000	35205000	37818000	34544000	53590000	24569000	33448000	39914000	31759000	48572000	36701000	39941000	28130000	28453000	24983000	22723000	25830000	26002000	28219000	30593000	38170000	22240000	26561000	26505000	20414000	19069000
P06801	P06801;Q3TQP6	Me1	NADP-dependent malic enzyme;Malic enzyme	sp|P06801|MAOX_MOUSE NADP-dependent malic enzyme OS=Mus musculus OX=10090 GN=Me1 PE=1 SV=2;tr|Q3TQP6|Q3TQP6_MOUSE Malic enzyme OS=Mus musculus OX=10090 GN=Me1 PE=1 SV=1	16	39707000	26643000	17411000	12172000	10944000	23534000	11215000	8839800	9011000	15247000	14294000	11575000	13560000	13636000	7468900	17505000	16773000	24042000	15676000	14731000	8825300	10820000	5607300	5180600	6258500	9803700	7458900	5082800	8494000	8072800	7034600	5336900
P24270	P24270;A2AL20	Cat	Catalase	sp|P24270|CATA_MOUSE Catalase OS=Mus musculus OX=10090 GN=Cat PE=1 SV=4	11	10362000	4305200	9377800	8584400	5273200	10421000	20973000	4765200	1617700	2964400	16922000	20895000	8951800	4266400	1677600	15862000	16361000	8397200	4762200	3389200	3546200	15019000	4779300	17259000	328108	243892	336570	3723100	4454400	7750100	1775200	295400
P70663	P70663;A0A0G2JFH7	Sparcl1	SPARC-like protein 1	sp|P70663|SPRL1_MOUSE SPARC-like protein 1 OS=Mus musculus OX=10090 GN=Sparcl1 PE=1 SV=3	13	36535000	17663000	22208000	17272000	23803000	40395000	19878000	14375000	17788000	12831000	17273000	13370000	27079000	23874000	20755000	32387000	19820000	16275000	11076000	14241000	15510000	15065000	13679000	12253000	13351000	17088000	15951000	9205600	14508000	14355000	9910400	12098000
G3X977	G3X977;Q61703;Q3UEG7;E0CX69	Itih2	Inter-alpha-trypsin inhibitor heavy chain H2	tr|G3X977|G3X977_MOUSE Inter-alpha-trypsin inhibitor heavy chain H2 OS=Mus musculus OX=10090 GN=Itih2 PE=1 SV=1;sp|Q61703|ITIH2_MOUSE Inter-alpha-trypsin inhibitor heavy chain H2 OS=Mus musculus OX=10090 GN=Itih2 PE=1 SV=1;tr|Q3UEG7|Q3UEG7_MOUSE Inter-alph	24	2235200000	1489200000	1591700000	1127600000	1306600000	1659100000	1159600000	1011800000	1209100000	1194100000	1346500000	1211600000	1256200000	1399800000	1166200000	1738500000	1265300000	1234700000	868660000	907550000	797180000	825360000	645350000	614350000	959560000	1096600000	800200000	641160000	878040000	931790000	733420000	665360000
Q9QUM9	Q9QUM9;E0CXB1;E0CYT2	Psma6	Proteasome subunit alpha type-6	sp|Q9QUM9|PSA6_MOUSE Proteasome subunit alpha type-6 OS=Mus musculus OX=10090 GN=Psma6 PE=1 SV=1;tr|E0CXB1|E0CXB1_MOUSE Proteasome endopeptidase complex OS=Mus musculus OX=10090 GN=Psma6 PE=1 SV=1	9	36228000	22432000	22306000	17655000	22642000	48278000	19813000	17580000	17376000	17673000	21693000	20605000	21265000	20388000	15228000	27937000	20119000	19751000	12854000	13355000	15973000	18931000	5221000	12720000	13352000	15814000	13290000	11060000	15599000	18069000	13443000	11702000
P29699	P29699;A0A338P7H5;A0A338P703;A0A338P7G1;A0A338P692;A0A338P6Y6;CON__P12763	Ahsg	Alpha-2-HS-glycoprotein	sp|P29699|FETUA_MOUSE Alpha-2-HS-glycoprotein OS=Mus musculus OX=10090 GN=Ahsg PE=1 SV=1;tr|A0A338P7H5|A0A338P7H5_MOUSE Alpha-2-HS-glycoprotein OS=Mus musculus OX=10090 GN=Ahsg PE=1 SV=1;tr|A0A338P703|A0A338P703_MOUSE Alpha-2-HS-glycoprotein OS=Mus musculu	13	6443400000	5770800000	6242600000	5583800000	7857500000	6735700000	7074200000	5483900000	6322400000	4995900000	7039300000	5352000000	6579800000	6784600000	6191300000	6547800000	4020400000	4144600000	2754200000	3532900000	4643800000	4192700000	3958500000	3713900000	4750300000	4310300000	3833500000	3329400000	4056900000	4256700000	3879000000	3730600000
Q8R242	Q8R242;Q8R242-2	Ctbs	Di-N-acetylchitobiase	sp|Q8R242|DIAC_MOUSE Di-N-acetylchitobiase OS=Mus musculus OX=10090 GN=Ctbs PE=1 SV=2;sp|Q8R242-2|DIAC_MOUSE Isoform 2 of Di-N-acetylchitobiase OS=Mus musculus OX=10090 GN=Ctbs	10	21321000	16550000	19458000	16980000	12570000	16903000	14115000	10960000	15198000	15286000	13289000	15219000	14710000	15354000	13509000	17558000	11260000	9747300	9378700	12287000	10354000	10972000	9841000	9429300	7682700	7155900	10836000	6988300	9989300	10432000	9804400	9373700
D3Z5G7	D3Z5G7;Q8VCC2;Q91WU0;H3BL34;D3Z298;Q64176	Ces1b	Carboxylic ester hydrolase	tr|D3Z5G7|D3Z5G7_MOUSE Carboxylic ester hydrolase OS=Mus musculus OX=10090 GN=Ces1b PE=1 SV=1	12	584750000	461540000	663060000	442710000	539890000	623780000	680870000	447400000	575530000	457150000	563840000	473800000	677130000	646340000	492360000	601040000	489810000	411530000	306210000	349010000	397010000	442190000	296410000	314400000	243760000	271970000	350590000	223590000	391950000	438790000	345580000	264300000
Q8R016	Q8R016;E9PY26;E9Q6V3;E9QA53	Blmh	Bleomycin hydrolase	sp|Q8R016|BLMH_MOUSE Bleomycin hydrolase OS=Mus musculus OX=10090 GN=Blmh PE=1 SV=1;tr|E9PY26|E9PY26_MOUSE Bleomycin hydrolase (Fragment) OS=Mus musculus OX=10090 GN=Blmh PE=1 SV=1	11	31757000	23004000	24363000	16559000	25644000	43898000	21713000	16044000	15879000	12963000	17565000	12029000	19574000	13707000	13182000	27824000	17039000	16355000	10596000	14896000	17833000	14454000	13483000	12013000	12805000	19335000	8963800	10168000	10430000	10809000	9869700	8880700
O89020	O89020;O89020-3;O89020-2;CON__REFSEQ:XP_585019	Afm	Afamin	sp|O89020|AFAM_MOUSE Afamin OS=Mus musculus OX=10090 GN=Afm PE=1 SV=2;sp|O89020-3|AFAM_MOUSE Isoform 3 of Afamin OS=Mus musculus OX=10090 GN=Afm;sp|O89020-2|AFAM_MOUSE Isoform 2 of Afamin OS=Mus musculus OX=10090 GN=Afm	30	2476900000	1828600000	1819700000	1770600000	1822200000	1998400000	1668200000	1480900000	1773700000	1701400000	1466100000	1226400000	1799100000	1747000000	1509800000	1836000000	1587900000	1532300000	1011400000	1066200000	1205100000	1150700000	1011500000	910430000	814600000	673150000	1201500000	644520000	1164200000	1235300000	1129300000	946740000
Q9Z0L8-2	Q9Z0L8-2;Q9Z0L8	Ggh	Gamma-glutamyl hydrolase	sp|Q9Z0L8-2|GGH_MOUSE Isoform II of Gamma-glutamyl hydrolase OS=Mus musculus OX=10090 GN=Ggh;sp|Q9Z0L8|GGH_MOUSE Gamma-glutamyl hydrolase OS=Mus musculus OX=10090 GN=Ggh PE=1 SV=2	6	28862000	27054000	27370000	27566000	31169000	31210000	26095000	16935000	30953000	27835000	29097000	27472000	25803000	25712000	29553000	24822000	23998000	23599000	15506000	17852000	17147000	17787000	12660000	13904000	17910000	13044000	16269000	13182000	16556000	19593000	16915000	14739000
P17563	P17563;Q63836;A0A0R4J135;G3UYY2;D6RHN2;G3UWK0;G3UZT2	Selenbp1;Selenbp2	Selenium-binding protein 1;Selenium-binding protein 2	sp|P17563|SBP1_MOUSE Methanethiol oxidase OS=Mus musculus OX=10090 GN=Selenbp1 PE=1 SV=2;sp|Q63836|SBP2_MOUSE Selenium-binding protein 2 OS=Mus musculus OX=10090 GN=Selenbp2 PE=1 SV=2;tr|A0A0R4J135|A0A0R4J135_MOUSE Selenium-binding protein 2 OS=Mus musculu	13	5798800	1905300	7616400	4098700	2193600	6498100	6288500	2225200	570510	3002500	7770200	33548000	4436200	4929400	1224900	5850600	4634900	4532400	2940800	2074700	707490	6663500	3452900	5707700	328108	1334300	3758700	16023000	1320800	6021600	458622	637330
P28843	P28843	Dpp4	Dipeptidyl peptidase 4;Dipeptidyl peptidase 4 membrane form;Dipeptidyl peptidase 4 soluble form	sp|P28843|DPP4_MOUSE Dipeptidyl peptidase 4 OS=Mus musculus OX=10090 GN=Dpp4 PE=1 SV=3	11	13725000	7993500	12525000	8467100	6043700	12469000	7965800	5273900	6273900	6420500	8276900	6265100	7814000	7699600	6390500	10858000	9086000	6883200	4854100	6000400	6169200	5212600	3657800	3040300	3521000	4816200	4658900	2392500	5787600	7906800	4244800	4830600
O35955	O35955	Psmb10	Proteasome subunit beta type-10	sp|O35955|PSB10_MOUSE Proteasome subunit beta type-10 OS=Mus musculus OX=10090 GN=Psmb10 PE=1 SV=1	3	11902000	5147600	5443700	5145700	6675500	12264000	6655200	5612100	3520700	7321500	6964100	4668200	5767000	5606300	4978200	7980500	6423700	5087600	4949500	4596700	4042600	5302500	283782	4522500	4118700	4454800	3583600	3583600	3578900	4761300	3488900	2180200
P63101	P63101;A0A2I3BQ03;D3YXF4;D3YXN6	Ywhaz	14-3-3 protein zeta/delta	sp|P63101|1433Z_MOUSE 14-3-3 protein zeta/delta OS=Mus musculus OX=10090 GN=Ywhaz PE=1 SV=1;tr|A0A2I3BQ03|A0A2I3BQ03_MOUSE 14-3-3 protein zeta/delta (Fragment) OS=Mus musculus OX=10090 GN=Ywhaz PE=1 SV=1	6	6646400	4993400	7254400	4141300	4256300	7082600	6709100	3626300	2219400	5206200	7718300	5310600	5157700	4616400	3053000	4260300	4064000	4323400	3744800	2999700	2859000	4722800	3010400	2856500	1794900	1955300	2992700	2709000	2650100	4955500	2479300	2166200
P13020	P13020;P13020-2;A0A0J9YUQ8;CON__Q3SX14;A6PWS5;A0A0J9YUJ8	Gsn	Gelsolin	sp|P13020|GELS_MOUSE Gelsolin OS=Mus musculus OX=10090 GN=Gsn PE=1 SV=3;sp|P13020-2|GELS_MOUSE Isoform 2 of Gelsolin OS=Mus musculus OX=10090 GN=Gsn;tr|A0A0J9YUQ8|A0A0J9YUQ8_MOUSE Actin-depolymerizing factor (Fragment) OS=Mus musculus OX=10090 GN=Gsn PE=1	34	2853900000	2103300000	2367700000	1757000000	2039200000	2608200000	2381900000	1521800000	2086100000	1904600000	2370200000	1744200000	2241700000	2466700000	1869800000	2258000000	1589400000	1568700000	1104300000	1318600000	1581200000	1550600000	1311200000	1196500000	1057600000	971990000	1376900000	817490000	1422100000	1563900000	1397500000	1287600000
P11087	P11087;P11087-2;CON__Q862S4	Col1a1	Collagen alpha-1(I) chain	sp|P11087|CO1A1_MOUSE Collagen alpha-1(I) chain OS=Mus musculus OX=10090 GN=Col1a1 PE=1 SV=4;sp|P11087-2|CO1A1_MOUSE Isoform 2 of Collagen alpha-1(I) chain OS=Mus musculus OX=10090 GN=Col1a1	6	9411100	12395000	13214000	5589300	20165000	23468000	15438000	7880700	12767000	7110400	33412000	15752000	11956000	16538000	22956000	16137000	8335800	12974000	6107500	6858600	12235000	9576400	12436000	12357000	4736800	6781200	7617100	6300500	12298000	11595000	6888000	11855000
E9QQ18	E9QQ18;E9QQ17;E0CZ58;Q9JM99-4;Q9JM99-3;Q9JM99-2;Q9JM99;A0A0R4J207;Q9JM99-5	Prg4	Proteoglycan 4;Proteoglycan 4 C-terminal part	tr|E9QQ18|E9QQ18_MOUSE Proteoglycan 4 OS=Mus musculus OX=10090 GN=Prg4 PE=1 SV=1;tr|E9QQ17|E9QQ17_MOUSE Proteoglycan 4 OS=Mus musculus OX=10090 GN=Prg4 PE=1 SV=1;tr|E0CZ58|E0CZ58_MOUSE Proteoglycan 4 OS=Mus musculus OX=10090 GN=Prg4 PE=1 SV=1;sp|Q9JM99-4|P	7	15285000	30313000	19203000	16142000	15791000	10716000	15005000	13003000	12583000	14011000	13799000	5481300	13045000	13458000	9465500	7153600	10738000	17944000	12072000	31676000	4902500	5952200	5265100	3225400	11378000	5577900	5395000	5942900	5579600	2477600	4475400	4212700
Q8C165	Q8C165;F7B8J4	Pm20d1	Probable carboxypeptidase PM20D1	sp|Q8C165|P20D1_MOUSE N-fatty-acyl-amino acid synthase/hydrolase PM20D1 OS=Mus musculus OX=10090 GN=Pm20d1 PE=1 SV=1	7	5008200	4892500	4905300	5017400	4862900	5984500	3803000	3537700	4987900	4063100	4595100	2964200	4586600	6625100	3504100	5571500	4172800	3031800	3086800	5030100	3193400	3747200	2933900	3395900	1542100	1544200	2777100	1345200	2359300	2625200	1820400	2756000
Q62009-5	Q62009-5;Q62009-3;Q62009-2;Q62009;Q62009-4;CON__Q2KJC7;F7C9H0	Postn	Periostin	sp|Q62009-5|POSTN_MOUSE Isoform 5 of Periostin OS=Mus musculus OX=10090 GN=Postn;sp|Q62009-3|POSTN_MOUSE Isoform 3 of Periostin OS=Mus musculus OX=10090 GN=Postn;sp|Q62009-2|POSTN_MOUSE Isoform 2 of Periostin OS=Mus musculus OX=10090 GN=Postn;sp|Q62009|POS	16	29983000	21397000	23717000	23425000	28283000	34006000	26836000	20006000	18876000	16872000	24640000	16599000	23729000	24696000	24802000	32894000	16031000	17719000	11137000	12076000	18862000	17719000	19473000	16964000	13761000	9764100	12110000	9049300	14191000	17126000	14892000	15110000
Q3U9N4	Q3U9N4;P28798;H3BLC9;H3BJE0	Grn	Granulins;Acrogranin;Granulin-1;Granulin-2;Granulin-3;Granulin-4;Granulin-5;Granulin-6;Granulin-7	tr|Q3U9N4|Q3U9N4_MOUSE Progranulin OS=Mus musculus OX=10090 GN=Grn PE=1 SV=1;sp|P28798|GRN_MOUSE Progranulin OS=Mus musculus OX=10090 GN=Grn PE=1 SV=2;tr|H3BLC9|H3BLC9_MOUSE Progranulin (Fragment) OS=Mus musculus OX=10090 GN=Grn PE=1 SV=1	5	13256000	7163800	7369100	8808300	9774700	13916000	6804300	7631100	9164900	11946000	4969000	629660	6513900	6681200	6290900	17290000	5590500	5282100	5230300	7218900	6728200	3186400	5688700	3987600	8039800	5303000	6838600	6236700	4437600	2533100	2921100	4013900
Q9WUU7	Q9WUU7	Ctsz	Cathepsin Z	sp|Q9WUU7|CATZ_MOUSE Cathepsin Z OS=Mus musculus OX=10090 GN=Ctsz PE=1 SV=1	6	4468600	3070800	3724500	5624200	3450600	5642300	3458200	3394600	3569200	5306000	3623800	3766800	2371400	3817700	3139200	6337700	2606600	2236400	1961200	3475100	2392200	1826000	2359900	1996400	2444900	2271800	2280500	2045600	2898000	2803800	2651400	2529300
Q3TCF3	Q3TCF3;B1B507;P18337	Sell	L-selectin	tr|Q3TCF3|Q3TCF3_MOUSE L-selectin OS=Mus musculus OX=10090 GN=Sell PE=1 SV=1;tr|B1B507|B1B507_MOUSE CD62 antigen-like family member L OS=Mus musculus OX=10090 GN=Sell PE=1 SV=1;sp|P18337|LYAM1_MOUSE L-selectin OS=Mus musculus OX=10090 GN=Sell PE=1 SV=1	3	71907000	34072000	44982000	33031000	28495000	61053000	44982000	33640000	32320000	30682000	41956000	28197000	47068000	37673000	28397000	45548000	28039000	29636000	22570000	23459000	27062000	31428000	25402000	23179000	17782000	21852000	8903700	15030000	31079000	32467000	25543000	21706000
P97797-2	P97797-2;P97797;A2ANC1;P97797-4;P97797-3	Sirpa	Tyrosine-protein phosphatase non-receptor type substrate 1	sp|P97797-2|SHPS1_MOUSE Isoform 2 of Tyrosine-protein phosphatase non-receptor type substrate 1 OS=Mus musculus OX=10090 GN=Sirpa;sp|P97797|SHPS1_MOUSE Tyrosine-protein phosphatase non-receptor type substrate 1 OS=Mus musculus OX=10090 GN=Sirpa PE=1 SV=2	4	8505100	5954300	6693000	5861500	4959200	10105000	5006700	3898800	3550300	5141800	5523900	4456900	6862300	8088800	4664800	5432500	4881800	4856700	2812900	4688700	516736	3026000	4178600	3746000	3227900	3397200	4387600	2319400	3769800	2982200	4763900	3057800
P09103	P09103;E9Q8G8	P4hb	Protein disulfide-isomerase	sp|P09103|PDIA1_MOUSE Protein disulfide-isomerase OS=Mus musculus OX=10090 GN=P4hb PE=1 SV=2	6	2844600	2805500	2219400	2154000	5026200	3935400	1615700	1448500	1080200	2031900	2568600	2112600	2295100	2015700	1902800	1744200	2052600	1902200	1441300	1968400	1741800	1937000	1199100	1522400	1479600	1056700	1369200	1149600	218026	1328100	458622	1592600
Q9CPY7	Q9CPY7;Q9CPY7-2;A0A0G2JEM7	Lap3	Cytosol aminopeptidase	sp|Q9CPY7|AMPL_MOUSE Cytosol aminopeptidase OS=Mus musculus OX=10090 GN=Lap3 PE=1 SV=3;sp|Q9CPY7-2|AMPL_MOUSE Isoform 2 of Cytosol aminopeptidase OS=Mus musculus OX=10090 GN=Lap3	22	562710000	366020000	314090000	256510000	350060000	647690000	250880000	261630000	248910000	256390000	259120000	188880000	314400000	269270000	186320000	371950000	234990000	267550000	156780000	187600000	238950000	192770000	161500000	140740000	183950000	221190000	171670000	116340000	209600000	200220000	188780000	136360000
E9PZF0	E9PZF0;Q01768;Q5NC80;P15532;Q5NC79	Gm20390;Nme2	Nucleoside diphosphate kinase;Nucleoside diphosphate kinase B	tr|E9PZF0|E9PZF0_MOUSE Nucleoside diphosphate kinase OS=Mus musculus OX=10090 GN=Gm20390 PE=3 SV=1;sp|Q01768|NDKB_MOUSE Nucleoside diphosphate kinase B OS=Mus musculus OX=10090 GN=Nme2 PE=1 SV=1	7	10627000	5404600	6757800	4395200	5795200	9948600	5005100	2818100	5528100	3255000	8158400	6251400	5856800	6601300	4749200	7394000	6554400	4152100	3902700	2516500	3529700	5622300	3235000	4323100	1252600	1738600	2479600	4480200	3714000	5348700	3252500	1851500
Q61830	Q61830	Mrc1	Macrophage mannose receptor 1	sp|Q61830|MRC1_MOUSE Macrophage mannose receptor 1 OS=Mus musculus OX=10090 GN=Mrc1 PE=1 SV=2	12	7765800	4138900	4514800	3078900	4184100	5864000	5866500	2717600	5972200	2937900	3822700	1438700	5190700	3994700	4089200	6556200	4849600	4360200	2426500	2804800	3482900	4291100	3576000	1183700	1299400	3313900	1898000	692920	3435400	2913300	1539500	352503
Q91Y97	Q91Y97	Aldob	Fructose-bisphosphate aldolase B	sp|Q91Y97|ALDOB_MOUSE Fructose-bisphosphate aldolase B OS=Mus musculus OX=10090 GN=Aldob PE=1 SV=3	8	36699000	29444000	29646000	11513000	9013400	9753700	9038100	7201600	10146000	20339000	9934600	26532000	8081400	10448000	5327700	11213000	12517000	19639000	8889800	8100100	6023800	9428800	6747000	5986300	4387200	5735700	8354300	10725000	10596000	11926000	7323700	6918700
A0A1B0GR60	A0A1B0GR60;Q9CPX4;P29391;P49945;A0A1Y7VNT9;A0A1B0GRH4	Ftl1;Ftl2	Ferritin;Ferritin light chain 1;Ferritin light chain 2	tr|A0A1B0GR60|A0A1B0GR60_MOUSE Ferritin OS=Mus musculus OX=10090 GN=Ftl1 PE=1 SV=1;tr|Q9CPX4|Q9CPX4_MOUSE Ferritin OS=Mus musculus OX=10090 GN=Ftl1 PE=1 SV=1;sp|P29391|FRIL1_MOUSE Ferritin light chain 1 OS=Mus musculus OX=10090 GN=Ftl1 PE=1 SV=2;sp|P49945|	5	13869000	11170000	14689000	8157700	6133100	9776800	8787200	5258200	2356400	10915000	7395400	16498000	15995000	13366000	5539600	10987000	9837200	9071600	4210400	6300500	1812400	6580000	283782	3924900	328108	8828200	9918600	5319600	7348000	8890900	6304700	4898100
P11352	P11352;A0A0A6YY34;A0A0A6YVV2	Gpx1	Glutathione peroxidase 1;Glutathione peroxidase	sp|P11352|GPX1_MOUSE Glutathione peroxidase 1 OS=Mus musculus OX=10090 GN=Gpx1 PE=1 SV=2;tr|A0A0A6YY34|A0A0A6YY34_MOUSE Glutathione peroxidase OS=Mus musculus OX=10090 GN=Gpx1 PE=1 SV=1;tr|A0A0A6YVV2|A0A0A6YVV2_MOUSE Glutathione peroxidase OS=Mus musculus	7	14333000	10044000	14620000	7398300	10806000	17791000	16153000	6188700	9770000	6728400	22294000	28679000	12058000	15951000	9053400	22984000	16299000	11630000	8830000	5461800	9867000	17531000	5506500	12305000	328108	243892	5850500	7037300	8024100	14663000	458622	6768200
Q11136	Q11136;G3UXC5	Pepd	Xaa-Pro dipeptidase	sp|Q11136|PEPD_MOUSE Xaa-Pro dipeptidase OS=Mus musculus OX=10090 GN=Pepd PE=1 SV=3	9	18297000	10453000	13052000	7876100	12494000	19321000	13403000	10933000	8541200	9935500	11476000	12743000	13236000	8983400	10273000	12173000	8468600	10395000	7369000	7635400	7549300	9248300	4749200	5368000	4476100	7512400	6193000	1989000	10112000	8241200	6867500	5592300
E9PZ16	E9PZ16;B1B0C7;Q05793	Hspg2	Basement membrane-specific heparan sulfate proteoglycan core protein;Endorepellin;LG3 peptide	tr|E9PZ16|E9PZ16_MOUSE Basement membrane-specific heparan sulfate proteoglycan core protein OS=Mus musculus OX=10090 GN=Hspg2 PE=1 SV=1;tr|B1B0C7|B1B0C7_MOUSE Basement membrane-specific heparan sulfate proteoglycan core protein OS=Mus musculus OX=10090 GN=	9	11411000	8976000	9180300	8443300	10081000	10701000	11278000	4770100	8121700	10487000	10092000	6730800	7270100	13974000	8787800	7567500	7203100	9480600	5787700	6009000	5480300	6194000	5519700	3456400	4844300	4146800	5418900	2599500	6556200	6192900	458622	4689000
Q9QX15	Q9QX15;Q9EQR4;A0A0G2JFW5;A0A0G2JGF3;Q91Z28	Clca3a1;Clca3a2	Calcium-activated chloride channel regulator 3A-1	sp|Q9QX15|CA3A1_MOUSE Calcium-activated chloride channel regulator 3A-1 OS=Mus musculus OX=10090 GN=Clca3a1 PE=1 SV=1;tr|Q9EQR4|Q9EQR4_MOUSE Chloride channel accessory 3A2 OS=Mus musculus OX=10090 GN=Clca3a2 PE=1 SV=1;tr|A0A0G2JFW5|A0A0G2JFW5_MOUSE Chlorid	4	3796000	2663600	2899100	2033900	2470300	3404500	2819900	2190400	2394400	1831100	4278000	1960000	2174000	2512000	1930200	3386100	317536	276250	1804600	2027300	3465600	2029100	1431200	2585800	2349600	1983900	2036900	2684000	218026	218254	458622	352503
A0A6I8MX27	A0A6I8MX27;P16125;D3Z7F0;A0A0N4SVV8	Ldhb	L-lactate dehydrogenase B chain;L-lactate dehydrogenase	tr|A0A6I8MX27|A0A6I8MX27_MOUSE L-lactate dehydrogenase OS=Mus musculus OX=10090 GN=Ldhb PE=1 SV=1;sp|P16125|LDHB_MOUSE L-lactate dehydrogenase B chain OS=Mus musculus OX=10090 GN=Ldhb PE=1 SV=2;tr|D3Z7F0|D3Z7F0_MOUSE L-lactate dehydrogenase (Fragment) OS=M	7	14767000	2789800	6960400	3558400	4651000	12862000	3804900	3796600	3873900	2155800	9493500	15654000	7302500	10017000	7241800	9522000	5986100	276250	7765000	2683200	2758000	8068200	885730	7115400	1427100	2565800	5119600	3461300	4646300	8716200	4234100	1242300
O09164	O09164	Sod3	Extracellular superoxide dismutase [Cu-Zn]	sp|O09164|SODE_MOUSE Extracellular superoxide dismutase [Cu-Zn] OS=Mus musculus OX=10090 GN=Sod3 PE=1 SV=1	8	202120000	109010000	122020000	94618000	98269000	108080000	98964000	68379000	100330000	91222000	100540000	98099000	83856000	107090000	65603000	96970000	75743000	74380000	54491000	65687000	71784000	69282000	48554000	44726000	29867000	39031000	55201000	30723000	79681000	79642000	58026000	49602000
P97321-3	P97321-3;P97321-2;P97321;G3UXR2;G3UYG3;G3UZ14	Fap	Prolyl endopeptidase FAP;Antiplasmin-cleaving enzyme FAP, soluble form	sp|P97321-3|SEPR_MOUSE Isoform 3 of Prolyl endopeptidase FAP OS=Mus musculus OX=10090 GN=Fap;sp|P97321-2|SEPR_MOUSE Isoform 2 of Prolyl endopeptidase FAP OS=Mus musculus OX=10090 GN=Fap;sp|P97321|SEPR_MOUSE Prolyl endopeptidase FAP OS=Mus musculus OX=10090	14	13098000	10738000	9630200	7148200	11097000	17262000	16866000	10325000	8840700	9175800	13042000	7518200	11964000	16054000	13442000	14810000	7516400	6525400	2141400	4808000	8786200	7395500	6228100	7499700	7688700	5285000	7423100	3792200	9092300	8554300	7509600	7123600
P23953	P23953;Q8VCT4	Ces1c	Carboxylesterase 1C	sp|P23953|EST1C_MOUSE Carboxylesterase 1C OS=Mus musculus OX=10090 GN=Ces1c PE=1 SV=4	31	18294000000	15926000000	19381000000	14066000000	15537000000	18087000000	18316000000	13105000000	14614000000	13805000000	16561000000	14505000000	18190000000	16984000000	13631000000	16227000000	12249000000	11647000000	8360700000	9344600000	10001000000	11120000000	7906300000	8025400000	6938100000	6574000000	8765500000	5824500000	10082000000	10787000000	9198800000	7502500000
P28063	P28063;G3UZW8;A0A494BAB6	Psmb8	Proteasome subunit beta type-8;Proteasome subunit beta type	sp|P28063|PSB8_MOUSE Proteasome subunit beta type-8 OS=Mus musculus OX=10090 GN=Psmb8 PE=1 SV=2;tr|G3UZW8|G3UZW8_MOUSE Proteasome subunit beta (Fragment) OS=Mus musculus OX=10090 GN=Psmb8 PE=1 SV=3;tr|A0A494BAB6|A0A494BAB6_MOUSE Proteasome subunit beta typ	4	13148000	8044600	7755200	5550600	7236700	11161000	5902200	4970000	3759400	5960200	7116900	5240600	5723600	5983300	3509700	9192300	7642900	4586000	3178500	4714900	3906800	4654100	283782	4460800	2907800	3025000	4213500	2555600	4600700	5363100	2669600	2884200
P47791-2	P47791-2;P47791	Gsr	Glutathione reductase, mitochondrial	sp|P47791-2|GSHR_MOUSE Isoform Cytoplasmic of Glutathione reductase, mitochondrial OS=Mus musculus OX=10090 GN=Gsr;sp|P47791|GSHR_MOUSE Glutathione reductase, mitochondrial OS=Mus musculus OX=10090 GN=Gsr PE=1 SV=3	8	15727000	11795000	14584000	7891000	8646500	22001000	7976200	8361400	7851000	4787200	5356700	5719200	8124500	7374300	5810800	14935000	7748500	276250	4423300	3897000	4312600	4856900	5233000	7553700	6666700	8189700	5771300	4096400	5651000	7833000	6441400	4221100
Q03311	Q03311;A0A0A6YVZ5	Bche	Cholinesterase	sp|Q03311|CHLE_MOUSE Cholinesterase OS=Mus musculus OX=10090 GN=Bche PE=1 SV=2	21	137660000	115290000	119620000	103640000	106560000	99210000	109460000	77418000	100670000	99715000	95380000	77056000	103600000	92142000	71551000	101670000	85183000	79985000	53488000	63997000	65840000	69423000	48599000	52136000	40965000	39868000	48969000	32004000	57794000	56571000	48031000	42830000
P40142	P40142;A0A286YE28	Tkt	Transketolase	sp|P40142|TKT_MOUSE Transketolase OS=Mus musculus OX=10090 GN=Tkt PE=1 SV=1;tr|A0A286YE28|A0A286YE28_MOUSE Transketolase (Fragment) OS=Mus musculus OX=10090 GN=Tkt PE=1 SV=1	10	9466300	7286900	8013100	5471100	5322600	9495200	7027300	3149600	4091900	2313800	6761500	9594600	6583600	4448200	3586400	6917800	5712700	5613800	2524600	3468900	2868200	6173400	3892300	4134300	2050000	1523300	2845000	3131600	2326800	4086700	1499600	2650300
P11680	P11680	Cfp	Properdin	sp|P11680|PROP_MOUSE Properdin OS=Mus musculus OX=10090 GN=Cfp PE=1 SV=2	12	232060000	153420000	131070000	126100000	163190000	133520000	158770000	137290000	180620000	110200000	134420000	83265000	163760000	166810000	167470000	242510000	87407000	98556000	66067000	84494000	99953000	77477000	95846000	76175000	61377000	89411000	86298000	61781000	106270000	98624000	70798000	97037000
P01592	P01592	Igj	Immunoglobulin J chain	sp|P01592|IGJ_MOUSE Immunoglobulin J chain OS=Mus musculus OX=10090 GN=Jchain PE=1 SV=4	5	90385000	16121000	28520000	28522000	21296000	31432000	17555000	3582800	13407000	12195000	14175000	6313700	4494400	6571200	5756700	10866000	23452000	27325000	10971000	13233000	13048000	7690800	3209200	2546800	15163000	10165000	8946200	6915900	4997900	3566900	7493600	10359000
O09043	O09043	Napsa	Napsin-A	sp|O09043|NAPSA_MOUSE Napsin-A OS=Mus musculus OX=10090 GN=Napsa PE=1 SV=1	7	18260000	15167000	15999000	14669000	13143000	12995000	10556000	8711800	8254100	8800100	16443000	9546700	10930000	10492000	9393800	14345000	10567000	9847400	7934000	9226400	7712200	9126500	4982000	228502	6019300	5376400	5955200	4347600	7582100	7924800	4896600	5438400
Q9DCD0	Q9DCD0	Pgd	6-phosphogluconate dehydrogenase, decarboxylating	sp|Q9DCD0|6PGD_MOUSE 6-phosphogluconate dehydrogenase, decarboxylating OS=Mus musculus OX=10090 GN=Pgd PE=1 SV=3	2	5806100	3641900	5619000	3246100	3414300	4925700	3183800	3010700	2351300	2218900	3709500	3245400	3157100	2903200	2724500	5144500	3422700	276250	2316000	2329400	2221400	3273300	283782	2723000	2646700	243892	377153	264280	2641300	2617100	2413600	3545800
P35505	P35505;D3Z2R9	Fah	Fumarylacetoacetase	sp|P35505|FAAA_MOUSE Fumarylacetoacetase OS=Mus musculus OX=10090 GN=Fah PE=1 SV=2	7	18706000	14518000	15628000	8021800	4615800	6442900	4388500	3712100	4627400	10331000	5898100	11908000	5765900	5826700	2932900	5895600	5808000	7731200	4877500	4487200	4717400	5292700	3744600	3269200	3115200	3593100	4750800	4317600	4079400	3973600	2979400	2996800
Q9R111	Q9R111;D3YU09;A0A494B982	Gda	Guanine deaminase	sp|Q9R111|GUAD_MOUSE Guanine deaminase OS=Mus musculus OX=10090 GN=Gda PE=1 SV=1;tr|D3YU09|D3YU09_MOUSE Guanine deaminase OS=Mus musculus OX=10090 GN=Gda PE=1 SV=1;tr|A0A494B982|A0A494B982_MOUSE Guanine deaminase OS=Mus musculus OX=10090 GN=Gda PE=1 SV=1	8	7229600	4446400	7042700	5482000	6443000	9800500	7965700	5375500	4121200	2350300	6280800	10290000	7082000	5016700	2799000	10147000	5980600	3683100	3302500	4063100	2539400	5861500	4514500	4897800	2543300	2331900	377153	2295000	2770800	3380800	3551200	2531700
Q9WVJ3	Q9WVJ3;A0A2I3BS14;A0A2I3BPG0	Cpq	Carboxypeptidase Q	sp|Q9WVJ3|CBPQ_MOUSE Carboxypeptidase Q OS=Mus musculus OX=10090 GN=Cpq PE=1 SV=1	13	139100000	86528000	94058000	87916000	66424000	84707000	82116000	54665000	76294000	85438000	77370000	63878000	82850000	89505000	56345000	87968000	65015000	62989000	39185000	46293000	53334000	54506000	39211000	40373000	39967000	31350000	42260000	24697000	46633000	44814000	39176000	33851000
Q9ET66	Q9ET66;D3Z6T6;Q9ET66-2;A0A3Q4EC30	Pi16	Peptidase inhibitor 16	sp|Q9ET66|PI16_MOUSE Peptidase inhibitor 16 OS=Mus musculus OX=10090 GN=Pi16 PE=1 SV=2;tr|D3Z6T6|D3Z6T6_MOUSE Peptidase inhibitor 16 OS=Mus musculus OX=10090 GN=Pi16 PE=1 SV=1;sp|Q9ET66-2|PI16_MOUSE Isoform 2 of Peptidase inhibitor 16 OS=Mus musculus OX=10	9	114210000	89632000	97759000	75007000	117380000	120320000	111620000	61976000	64930000	68016000	120050000	84187000	110850000	136670000	86033000	95536000	52201000	60788000	39139000	54619000	61310000	61002000	55814000	50251000	42852000	51162000	63888000	34154000	45690000	59870000	47656000	44966000
A3KGE4	A3KGE4;G3X9Q7;Q8R357;O88998-3;O88998;O88998-4;O88998-2	Olfm1	Noelin	tr|A3KGE4|A3KGE4_MOUSE Noelin OS=Mus musculus OX=10090 GN=Olfm1 PE=1 SV=1;tr|G3X9Q7|G3X9Q7_MOUSE Noelin OS=Mus musculus OX=10090 GN=Olfm1 PE=1 SV=1;tr|Q8R357|Q8R357_MOUSE Noelin OS=Mus musculus OX=10090 GN=Olfm1 PE=1 SV=1;sp|O88998-3|NOE1_MOUSE Isoform 3 o	6	21575000	11452000	14399000	8887600	12395000	16565000	15513000	6647600	13273000	6998900	11430000	7429500	12425000	18579000	5621300	14617000	11535000	9756100	5222500	6146300	8459300	8141700	5994500	7718300	6155200	5873200	3673300	2643400	8396000	4713500	4771000	5244300
Q9QWK4	Q9QWK4	Cd5l	CD5 antigen-like	sp|Q9QWK4|CD5L_MOUSE CD5 antigen-like OS=Mus musculus OX=10090 GN=Cd5l PE=1 SV=3	10	36598000	11743000	14059000	14326000	12434000	11821000	13324000	3545000	11092000	8552400	12801000	6115300	12152000	18817000	11142000	10138000	7144600	10408000	7098400	7216800	9356400	4626600	7123100	6120300	8869700	5663900	6745700	4371700	7445400	7102400	5661100	5194300
Q8CFZ6	Q8CFZ6;P43025	Clec3b	Tetranectin	tr|Q8CFZ6|Q8CFZ6_MOUSE C-type lectin domain family 3, member b OS=Mus musculus OX=10090 GN=Clec3b PE=1 SV=1;sp|P43025|TETN_MOUSE Tetranectin OS=Mus musculus OX=10090 GN=Clec3b PE=1 SV=2	5	116960000	65773000	91336000	66278000	62355000	123430000	85697000	68840000	79182000	70551000	93260000	75890000	78503000	88493000	83540000	114380000	60658000	58354000	46028000	42429000	40266000	52279000	33657000	39456000	31759000	46952000	54084000	33168000	44354000	47752000	44531000	40999000
Q3UXJ2	Q3UXJ2;P82198	Tgfbi	Transforming growth factor-beta-induced protein ig-h3	tr|Q3UXJ2|Q3UXJ2_MOUSE Transforming growth factor-beta-induced protein ig-h3 OS=Mus musculus OX=10090 GN=Tgfbi PE=1 SV=1;sp|P82198|BGH3_MOUSE Transforming growth factor-beta-induced protein ig-h3 OS=Mus musculus OX=10090 GN=Tgfbi PE=1 SV=1	13	20116000	12218000	9774200	10057000	10679000	13753000	11755000	7751600	7536100	7904100	12364000	8964900	11044000	12236000	10349000	14051000	7647400	8842900	5211800	4626300	6946100	5579200	4745900	4239800	4257200	5384200	6841900	5164300	6103700	5406000	5262100	6288400
A0A0G2JE99	A0A0G2JE99;P01843		Ig lambda-1 chain C region	tr|A0A0G2JE99|A0A0G2JE99_MOUSE Immunoglobulin lambda constant 1 (Fragment) OS=Mus musculus OX=10090 GN=Iglc1 PE=4 SV=1;sp|P01843|LAC1_MOUSE Ig lambda-1 chain C region OS=Mus musculus OX=10090 PE=1 SV=1	2	15269000	5189500	8418700	7643700	5079500	7731800	5082200	3694700	7248700	5660900	4291600	18331000	3798600	7634900	3294400	14783000	6095700	3206600	5368900	8961400	1936300	2514300	2349700	2981500	4105300	3535300	4021100	1498500	2418800	3416100	7898200	2805700
O55111	O55111;Q8VCE3;Q811I1	Dsg2	Desmoglein-2	sp|O55111|DSG2_MOUSE Desmoglein-2 OS=Mus musculus OX=10090 GN=Dsg2 PE=1 SV=3;tr|Q8VCE3|Q8VCE3_MOUSE Desmoglein-2 OS=Mus musculus OX=10090 GN=Dsg2 PE=1 SV=1;tr|Q811I1|Q811I1_MOUSE Desmoglein-2 OS=Mus musculus OX=10090 GN=Dsg2 PE=1 SV=1	4	7211300	5358700	7173200	4015500	3206900	9904300	5517600	3560900	3862300	4260900	5149400	3116800	8760200	7620300	5080300	7416300	3086600	3287000	223377	2182300	2559800	4122900	2841900	228502	2653000	3881200	3881600	3247800	4280200	2395900	2791900	3410700
P05201	P05201;F7ALS6	Got1	Aspartate aminotransferase, cytoplasmic	sp|P05201|AATC_MOUSE Aspartate aminotransferase, cytoplasmic OS=Mus musculus OX=10090 GN=Got1 PE=1 SV=3;tr|F7ALS6|F7ALS6_MOUSE Aspartate transaminase (Fragment) OS=Mus musculus OX=10090 GN=Got1 PE=1 SV=1	10	29566000	8149500	11864000	4958200	4777400	11287000	6327600	3557600	6102000	4360200	9542800	15825000	7913800	9446000	6834600	12524000	6540800	4413600	5312200	3268800	2974200	11118000	2201400	4765900	1305400	2588300	5614600	3997500	5537200	7633700	5838800	954530
E9QPU1	E9QPU1;Q8CIZ8;Q3TPE1;Q3TD35;Q8CIZ8-2;S4R195	Vwf	von Willebrand factor;von Willebrand antigen 2	tr|E9QPU1|E9QPU1_MOUSE von Willebrand factor OS=Mus musculus OX=10090 GN=Vwf PE=1 SV=2;sp|Q8CIZ8|VWF_MOUSE von Willebrand factor OS=Mus musculus OX=10090 GN=Vwf PE=1 SV=2	28	6200200	1948900	6328300	2926700	4589600	4490100	1251700	1091500	3314400	52428000	58459000	18637000	6415400	5517700	3088900	7020400	3642600	1768400	14686000	4955500	525920	30992000	367950	1517100	216530	3331900	479270	2436200	16464000	5943200	1027800	449910
P10810	P10810	Cd14	Monocyte differentiation antigen CD14	sp|P10810|CD14_MOUSE Monocyte differentiation antigen CD14 OS=Mus musculus OX=10090 GN=Cd14 PE=1 SV=1	7	5861400	4554900	5903900	5054300	4017100	4823700	5899200	5699000	3011600	2847800	4513600	3689900	4686300	4336900	4318100	5259700	3466200	276250	223377	2994000	2458500	3622800	3713500	2777600	3042200	1678400	2432700	264280	3035900	3061300	2456900	352503
A2AI62	A2AI62;Q9Z0Z4-2;Q9Z0Z4	Heph	Hephaestin	tr|A2AI62|A2AI62_MOUSE Hephaestin OS=Mus musculus OX=10090 GN=Heph PE=1 SV=1;sp|Q9Z0Z4-2|HEPH_MOUSE Isoform 2 of Hephaestin OS=Mus musculus OX=10090 GN=Heph;sp|Q9Z0Z4|HEPH_MOUSE Hephaestin OS=Mus musculus OX=10090 GN=Heph PE=1 SV=3	5	8177500	4667800	3514900	4074800	3503400	4506100	4291600	3929500	3653400	3774600	5961700	3735700	4096100	3881200	2364300	5519900	3299800	2553800	2833100	2405200	3634600	3089800	1463000	228502	328108	1473200	2579700	264280	2789800	2961300	3221600	352503
Q3U2G2	Q3U2G2;Q61316	Hspa4	Heat shock 70 kDa protein 4	tr|Q3U2G2|Q3U2G2_MOUSE Heat shock 70 kDa protein 4 OS=Mus musculus OX=10090 GN=Hspa4 PE=1 SV=1;sp|Q61316|HSP74_MOUSE Heat shock 70 kDa protein 4 OS=Mus musculus OX=10090 GN=Hspa4 PE=1 SV=1	12	13987000	7098100	8568300	4898300	8834400	26644000	8024600	7397100	4823000	4556500	7954600	8198800	6462200	7390100	6055000	10214000	5484100	6050300	4437800	4622500	5045100	5536900	3822200	5189500	3366800	4326700	3620400	3214700	2241000	3055900	3540100	1991200
Q64442	Q64442	Sord	Sorbitol dehydrogenase	sp|Q64442|DHSO_MOUSE Sorbitol dehydrogenase OS=Mus musculus OX=10090 GN=Sord PE=1 SV=3	8	47811000	27060000	34525000	18790000	10668000	12698000	11679000	5661500	9238700	13298000	14600000	34385000	10951000	16204000	3832000	12354000	15061000	18085000	8153000	9066600	6103500	11892000	6840600	6888000	1590800	5627900	7430500	8085300	8471800	8636700	2818400	4799900
P00688	P00688;E9PV85	Amy2;Amy2a1	Pancreatic alpha-amylase;Alpha-amylase	sp|P00688|AMYP_MOUSE Pancreatic alpha-amylase OS=Mus musculus OX=10090 GN=Amy2 PE=1 SV=2;tr|E9PV85|E9PV85_MOUSE Alpha-amylase (Fragment) OS=Mus musculus OX=10090 GN=Amy2a1 PE=1 SV=1	10	20839000	13066000	19364000	13123000	212790000	20795000	14921000	10381000	15536000	13049000	15180000	7627900	16897000	14379000	12799000	16184000	11866000	9217900	9437900	10236000	11815000	8648700	10778000	8529800	21995000	14195000	12286000	10882000	8831800	12539000	9429200	22027000
P03953-2	P03953-2;P03953	Cfd	Complement factor D	sp|P03953-2|CFAD_MOUSE Isoform 2 of Complement factor D OS=Mus musculus OX=10090 GN=Cfd;sp|P03953|CFAD_MOUSE Complement factor D OS=Mus musculus OX=10090 GN=Cfd PE=1 SV=1	11	814050000	437100000	607770000	441220000	956270000	1472400000	895220000	714690000	764090000	488430000	952670000	756530000	1042800000	903830000	1188500000	1555700000	299430000	295430000	212320000	292140000	430880000	373730000	300520000	304860000	335840000	541420000	427590000	298090000	451430000	538010000	444390000	410010000
Q99JC1	Q99JC1;P01844	Iglc2	Ig lambda-2 chain C region	tr|Q99JC1|Q99JC1_MOUSE Ig lambda-2 chain C region (Fragment) OS=Mus musculus OX=10090 GN=Iglc2 PE=1 SV=1;sp|P01844|LAC2_MOUSE Ig lambda-2 chain C region OS=Mus musculus OX=10090 GN=Iglc2 PE=1 SV=1	4	10175000	4719800	8466600	3824100	2287300	8196600	1823000	924800	2315300	4158200	2941900	1705400	1162100	1613400	967930	4926900	4653300	2893400	1643400	1658200	2408300	1669400	934540	228502	2227400	1688700	979340	1286000	716440	218254	1209200	945310
A0A075B5P6	A0A075B5P6;A0A075B6A0;P01872;P01872-2	Ighm	Ig mu chain C region	tr|A0A075B5P6|A0A075B5P6_MOUSE Immunoglobulin heavy constant mu (Fragment) OS=Mus musculus OX=10090 GN=Ighm PE=1 SV=1;tr|A0A075B6A0|A0A075B6A0_MOUSE Immunoglobulin heavy constant mu (Fragment) OS=Mus musculus OX=10090 GN=Ighm PE=1 SV=2;sp|P01872|IGHM_MOUSE	18	1527000000	203630000	346110000	542870000	263790000	453710000	77037000	46643000	169820000	222450000	231670000	109570000	31588000	49359000	37935000	115140000	245730000	350010000	126290000	133140000	139720000	87177000	38469000	32462000	176570000	122900000	143840000	87373000	28610000	25648000	71807000	24256000
Q60994	Q60994;E9PWU4	Adipoq	Adiponectin	sp|Q60994|ADIPO_MOUSE Adiponectin OS=Mus musculus OX=10090 GN=Adipoq PE=1 SV=2;tr|E9PWU4|E9PWU4_MOUSE Adiponectin (Fragment) OS=Mus musculus OX=10090 GN=Adipoq PE=1 SV=1	6	1937900000	1073200000	1085600000	1165000000	626560000	1326900000	1067200000	627890000	1087900000	1202500000	1024200000	648680000	963630000	980350000	644480000	1351300000	586070000	560420000	401100000	518690000	437030000	471210000	278510000	297360000	208420000	358910000	395050000	209930000	429570000	440090000	333910000	359360000
E9Q9C6	E9Q9C6;E9Q0B5	Fcgbp	Fc fragment of IgG-binding protein	tr|E9Q9C6|E9Q9C6_MOUSE Fc fragment of IgG-binding protein OS=Mus musculus OX=10090 GN=Fcgbp PE=1 SV=1;tr|E9Q0B5|E9Q0B5_MOUSE Fc fragment of IgG-binding protein OS=Mus musculus OX=10090 GN=Fcgbp PE=1 SV=1	27	44206000	11416000	11406000	6128400	13452000	39686000	9852200	8004300	6273600	10840000	18322000	7499100	3990600	10568000	7873500	20613000	8186400	10812000	5411800	422470	7738800	8735700	6506300	5974300	1545700	13414000	4917900	2476400	1332700	430180	1121400	5767900
Q06770	Q06770	Serpina6	Corticosteroid-binding globulin	sp|Q06770|CBG_MOUSE Corticosteroid-binding globulin OS=Mus musculus OX=10090 GN=Serpina6 PE=1 SV=1	20	4594300000	3138000000	3605500000	3700200000	1918400000	2994400000	3011500000	1661400000	2731400000	3193400000	2711400000	2431900000	2987500000	2931400000	1481300000	2561600000	1519600000	1628500000	1012900000	1202500000	878310000	1269200000	580740000	722480000	455020000	694420000	829110000	401870000	873960000	1012700000	958870000	848560000
P97821	P97821;D3Z220	Ctsc	Dipeptidyl peptidase 1;Dipeptidyl peptidase 1 exclusion domain chain;Dipeptidyl peptidase 1 heavy chain;Dipeptidyl peptidase 1 light chain	sp|P97821|CATC_MOUSE Dipeptidyl peptidase 1 OS=Mus musculus OX=10090 GN=Ctsc PE=1 SV=1	3	3469600	2591100	2786700	2219600	2491600	2828200	2862100	1830000	2265800	4705700	2180400	1445300	731140	1256800	2897600	2939100	1235200	1144500	915240	1060500	892330	1119800	599910	533840	760510	243892	377153	264280	1423900	860360	458622	535570
G3XA25	G3XA25;Q80X81;Q8CAY6;A0A3B2WAL8	Acat2;Acat3	Acetyl-CoA acetyltransferase, cytosolic	tr|G3XA25|G3XA25_MOUSE Acetyl-CoA acetyltransferase, cytosolic OS=Mus musculus OX=10090 GN=Acat2 PE=1 SV=1;tr|Q80X81|Q80X81_MOUSE Acetyl-Coenzyme A acetyltransferase 3 OS=Mus musculus OX=10090 GN=Acat3 PE=1 SV=1;sp|Q8CAY6|THIC_MOUSE Acetyl-CoA acetyltransf	3	3470000	1330500	1177300	295430	269240	929930	261030	189440	218100	396970	679360	945660	284530	167740	193070	308050	285600	574360	174310	167260	164860	219630	124610	149010	85400	160590	196700	325140	222800	225050	104890	99891
P07724	P07724;CON__P02768-1	Alb	Serum albumin	sp|P07724|ALBU_MOUSE Albumin OS=Mus musculus OX=10090 GN=Alb PE=1 SV=3	29	14785000	4828300	16042000	8696100	6318800	4003600	3643700	1636900	11298000	5712700	634710000	15157000	11153000	27246000	8588700	20367000	63773000	7276400	11943000	16852000	8269600	7802400	643670	4516000	2807700	4289900	2983100	3750700	8489100	2879700	10063000	6324900
Q9CZB2	Q9CZB2;Q60696;A0A1W2P7B8;A0A1W2P7H5	Pmel	Melanocyte protein PMEL;M-alpha;M-beta	tr|Q9CZB2|Q9CZB2_MOUSE Melanocyte protein PMEL OS=Mus musculus OX=10090 GN=Pmel PE=2 SV=1;sp|Q60696|PMEL_MOUSE Melanocyte protein PMEL OS=Mus musculus OX=10090 GN=Pmel PE=1 SV=1;tr|A0A1W2P7B8|A0A1W2P7B8_MOUSE Melanocyte protein PMEL (Fragment) OS=Mus muscu	7	6482000	6290500	2758700	1940900	5946400	50283000	2497700	2166700	3780000	1961100	11069000	5088400	15123000	72848000	2097800	1868900	3239300	2836100	579730	331010	8134400	1837100	630670	672700	781150	12756000	2055300	782730	218026	1750500	458622	352503
Q91YI0	Q91YI0;E0CY49;F7D439;E0CYV3	Asl	Argininosuccinate lyase	sp|Q91YI0|ARLY_MOUSE Argininosuccinate lyase OS=Mus musculus OX=10090 GN=Asl PE=1 SV=1;tr|E0CY49|E0CY49_MOUSE Argininosuccinate lyase (Fragment) OS=Mus musculus OX=10090 GN=Asl PE=1 SV=1	8	29605000	4454600	16124000	1878400	1396300	1460200	863740	1130700	1119000	1749300	1335900	9716300	587620	1015600	975020	1828400	320700	954790	487050	506850	617390	478490	319990	382610	328108	699370	462710	1377900	501240	886810	458622	681980
Q6GQT1	Q6GQT1	A2mp	Alpha-2-macroglobulin-P	sp|Q6GQT1|A2MG_MOUSE Alpha-2-macroglobulin-P OS=Mus musculus OX=10090 GN=A2m PE=2 SV=2	56	13406000	122310000	34378000	7027700	72463000	18114000	126390000	56634000	63854000	8827300	99332000	58945000	57226000	102750000	67705000	16023000	1145700	1930600	925830	587190	3169700	1329900	2074800	1731900	974340	1050300	1065200	950190	2739300	2673900	1760000	1568200
Q02596	Q02596;B7ZNZ9;A0A2I3BPT0	Glycam1	Glycosylation-dependent cell adhesion molecule 1	sp|Q02596|GLCM1_MOUSE Glycosylation-dependent cell adhesion molecule 1 OS=Mus musculus OX=10090 GN=Glycam1 PE=1 SV=1;tr|B7ZNZ9|B7ZNZ9_MOUSE Glycosylation-dependent cell adhesion molecule 1 OS=Mus musculus OX=10090 GN=Glycam1 PE=1 SV=1;tr|A0A2I3BPT0|A0A2I3B	2	36363000	32698000	36091000	37936000	47382000	53310000	38970000	23642000	24946000	25002000	34798000	22630000	36222000	31321000	23563000	28725000	1297700	1798100	765210	540610	516736	670670	1004400	1513200	328108	511160	377153	435190	1367800	943200	443660	352503
Q19LI2	Q19LI2;A0A2I3BQV2	A1bg	Alpha-1B-glycoprotein	sp|Q19LI2|A1BG_MOUSE Alpha-1B-glycoprotein OS=Mus musculus OX=10090 GN=A1bg PE=1 SV=1	31	13964000000	4861400000	5045700000	5996600000	1072400000	5242300000	596680000	2000700000	5500500000	11992000000	403110000	4299500000	1500900000	1052300000	263950000	7866600000	175830	17029	59620	222850	8563.9	94988	15663	637630	23534	243892	377153	12452	218026	10474	458622	352503
A0A075B5J9	A0A075B5J9;A0A075B5K3;A0A0G2JFA8;A0A0G2JDN5	Igkv17-127;Igkv17-121	Immunoglobulin kappa variable 17-127	tr|A0A075B5J9|A0A075B5J9_MOUSE Immunoglobulin kappa variable 17-127 OS=Mus musculus OX=10090 GN=Igkv17-127 PE=4 SV=7;tr|A0A075B5K3|A0A075B5K3_MOUSE Immunoglobulin kappa variable 17-121 OS=Mus musculus OX=10090 GN=Igkv17-121 PE=4 SV=7;tr|A0A0G2JFA8|A0A0G2JF	2	15575000	598482	406906	505140	298806	312961	447227	486744	48553000	9178100	409407	455300	345618	170466	190592	579184	317536	276250	223377	331010	516736	218384	283782	228502	328108	243892	377153	264280	218026	218254	458622	352503
A0A075B5K0	A0A075B5K0;A0A140T8P9;P01638;P01637	Igkv14-126	Immunoglobulin kappa variable 14-126 (Fragment)	tr|A0A075B5K0|A0A075B5K0_MOUSE Immunoglobulin kappa variable 14-126 (Fragment) OS=Mus musculus OX=10090 GN=Igkv14-126 PE=4 SV=7	3	17653000	3783100	4255200	6068600	298806	312961	447227	486744	3220300	2968500	6861600	455300	345618	170466	190592	579184	317536	276250	223377	1316500	516736	218384	2993600	228502	328108	243892	377153	264280	218026	218254	458622	352503
A0A075B5K2	A0A075B5K2	Igkv9-124	Immunoglobulin kappa chain variable 9-124	tr|A0A075B5K2|A0A075B5K2_MOUSE Immunoglobulin kappa chain variable 9-124 OS=Mus musculus OX=10090 GN=Igkv9-124 PE=1 SV=7	1	10583000	598482	406906	3037300	298806	23949000	447227	486744	519823	2581400	409407	455300	345618	170466	190592	579184	317536	3492800	2071000	331010	516736	218384	283782	228502	328108	243892	377153	264280	218026	218254	458622	352503
A0A075B5L7	A0A075B5L7	Igkv4-80	Immunoglobulin kappa variable 4-80 (Fragment)	tr|A0A075B5L7|A0A075B5L7_MOUSE Immunoglobulin kappa variable 4-80 (Fragment) OS=Mus musculus OX=10090 GN=Igkv4-80 PE=4 SV=2	1	591246	598482	406906	8644100	298806	312961	447227	8251700	519823	318575	409407	455300	345618	170466	190592	579184	317536	10831000	223377	331010	516736	218384	283782	228502	328108	243892	377153	264280	218026	218254	458622	352503
A0A075B5M1	A0A075B5M1	Igkv4-63	Immunoglobulin kappa variable 4-63	tr|A0A075B5M1|A0A075B5M1_MOUSE Immunoglobulin kappa variable 4-63 OS=Mus musculus OX=10090 GN=Igkv4-63 PE=1 SV=1	1	3135700	598482	406906	505140	298806	312961	447227	486744	519823	318575	4731500	455300	345618	170466	190592	579184	317536	276250	4084300	331010	516736	218384	283782	228502	328108	243892	377153	264280	218026	218254	458622	352503
A0A075B5M7	A0A075B5M7;A0A0G2JDV4;A0A0B4J1J1	Igkv5-39	Immunoglobulin kappa variable 5-39	tr|A0A075B5M7|A0A075B5M7_MOUSE Immunoglobulin kappa variable 5-39 OS=Mus musculus OX=10090 GN=Igkv5-39 PE=1 SV=7;tr|A0A0G2JDV4|A0A0G2JDV4_MOUSE Immunoglobulin kappa variable 5-39 (Fragment) OS=Mus musculus OX=10090 GN=Igkv5-39 PE=1 SV=4	3	40502000	3685200	10172000	88600000	22690000	2775500	7637400	486744	22603000	17218000	12178000	455300	345618	170466	190592	3904500	10634000	74134000	15411000	10132000	48705000	12990000	283782	5511800	6480600	9281900	5075400	6104100	218026	218254	458622	352503
A0A075B5M8	A0A075B5M8;A0A0G2JEI7	Igkv12-38	Immunoglobulin kappa chain variable 12-38	tr|A0A075B5M8|A0A075B5M8_MOUSE Immunoglobulin kappa chain variable 12-38 OS=Mus musculus OX=10090 GN=Igkv12-38 PE=4 SV=7;tr|A0A0G2JEI7|A0A0G2JEI7_MOUSE Immunoglobulin kappa chain variable 12-38 (Fragment) OS=Mus musculus OX=10090 GN=Igkv12-38 PE=4 SV=4	1	591246	598482	406906	505140	298806	312961	447227	486744	519823	318575	409407	455300	345618	170466	190592	579184	317536	276250	223377	331010	516736	218384	283782	228502	328108	243892	377153	264280	218026	218254	458622	352503
A0A075B5N4	A0A075B5N4	Igkv8-27	Immunoglobulin kappa chain variable 8-27	tr|A0A075B5N4|A0A075B5N4_MOUSE Immunoglobulin kappa chain variable 8-27 OS=Mus musculus OX=10090 GN=Igkv8-27 PE=4 SV=1	1	591246	598482	406906	505140	298806	312961	447227	486744	519823	318575	409407	455300	345618	170466	190592	579184	317536	276250	223377	331010	516736	218384	283782	228502	328108	243892	377153	264280	218026	218254	458622	352503
A0A075B5P5	A0A075B5P5;A0A1Y7VJN6;P03987-2;P03987	Ighg3	Ig gamma-3 chain C region	tr|A0A075B5P5|A0A075B5P5_MOUSE Immunoglobulin heavy constant gamma 3 (Fragment) OS=Mus musculus OX=10090 GN=Ighg3 PE=4 SV=1;tr|A0A1Y7VJN6|A0A1Y7VJN6_MOUSE Immunoglobulin heavy constant gamma 3 (Fragment) OS=Mus musculus OX=10090 GN=Ighg3 PE=4 SV=1;sp|P0398	1	591246	598482	406906	505140	298806	312961	447227	486744	519823	318575	409407	455300	1647500	170466	190592	1646700	317536	276250	223377	331010	5177000	218384	283782	228502	328108	243892	377153	1811500	1453700	218254	458622	352503
A0A075B5R0	A0A075B5R0;A0A0B4J1P4	Ighv5-16	Immunoglobulin heavy variable 5-16	tr|A0A075B5R0|A0A075B5R0_MOUSE Immunoglobulin heavy variable 5-16 OS=Mus musculus OX=10090 GN=Ighv5-16 PE=1 SV=1;tr|A0A0B4J1P4|A0A0B4J1P4_MOUSE Immunoglobulin heavy variable 5-16 (Fragment) OS=Mus musculus OX=10090 GN=Ighv5-16 PE=1 SV=1	2	22506000	598482	2909700	505140	298806	312961	447227	486744	519823	318575	409407	455300	345618	170466	190592	579184	317536	2297000	223377	331010	516736	218384	283782	228502	328108	243892	377153	264280	218026	218254	458622	352503
A0A075B5R5	A0A075B5R5;P01806;P01812;P01810;P01808;P01807	Ighv4-1	Ig heavy chain V region 441;Ig heavy chain V region MOPC 173;Ig heavy chain V region J539;Ig heavy chain V region T601;Ig heavy chain V region X44	tr|A0A075B5R5|A0A075B5R5_MOUSE Immunoglobulin heavy variable 4-1 (Fragment) OS=Mus musculus OX=10090 GN=Ighv4-1 PE=1 SV=7;sp|P01806|HVM36_MOUSE Ig heavy chain V region 441 OS=Mus musculus OX=10090 PE=4 SV=1;sp|P01812|HVM42_MOUSE Ig heavy chain V region MOP	2	25724000	4541300	7721800	4366000	298806	8811600	447227	486744	519823	318575	409407	455300	345618	170466	190592	579184	3321600	276250	223377	2498000	516736	218384	283782	228502	328108	1882900	377153	264280	218026	218254	458622	352503
A0A075B5S1	A0A075B5S1;A0A0B4J1P3;A0A0B4J1J5;A0A0B4J1J4	Ighv9-1	Immunoglobulin heavy variable 9-1	tr|A0A075B5S1|A0A075B5S1_MOUSE Immunoglobulin heavy variable 9-1 OS=Mus musculus OX=10090 GN=Ighv9-1 PE=4 SV=1;tr|A0A0B4J1P3|A0A0B4J1P3_MOUSE Immunoglobulin heavy variable 9-1 (Fragment) OS=Mus musculus OX=10090 GN=Ighv9-1 PE=4 SV=1	3	591246	598482	406906	505140	298806	312961	447227	486744	519823	318575	409407	455300	345618	170466	190592	579184	317536	276250	223377	331010	516736	218384	283782	228502	328108	243892	377153	264280	218026	218254	458622	352503
A0A075B5T2	A0A075B5T2;A0A075B5T3;P01800;P01799;P01798;P01797;P01796;P01802;P01801	Ighv6-3;Ighv6-6	Ig heavy chain V-III region T957;Ig heavy chain V-III region ABE-47N;Ig heavy chain V-III region E109;Ig heavy chain V-III region U61;Ig heavy chain V-III region A4;Ig heavy chain V-III region W3082;Ig heavy chain V-III region J606	tr|A0A075B5T2|A0A075B5T2_MOUSE Immunoglobulin heavy variable 6-3 (Fragment) OS=Mus musculus OX=10090 GN=Ighv6-3 PE=4 SV=7;tr|A0A075B5T3|A0A075B5T3_MOUSE Immunoglobulin heavy variable 6-6 (Fragment) OS=Mus musculus OX=10090 GN=Ighv6-6 PE=4 SV=1;sp|P01800|HV	2	10999000	598482	4712200	9158700	298806	312961	447227	486744	519823	318575	409407	455300	345618	170466	190592	579184	12482000	276250	3139400	5875400	516736	218384	283782	228502	3376700	243892	377153	264280	218026	218254	458622	352503
A0A075B5T9	A0A075B5T9;A0A0A6YW37	Ighv1-9	Immunoglobulin heavy variable V1-9	tr|A0A075B5T9|A0A075B5T9_MOUSE Immunoglobulin heavy variable V1-9 OS=Mus musculus OX=10090 GN=Ighv1-9 PE=4 SV=1;tr|A0A0A6YW37|A0A0A6YW37_MOUSE Immunoglobulin heavy variable V1-9 (Fragment) OS=Mus musculus OX=10090 GN=Ighv1-9 PE=4 SV=1	1	591246	598482	406906	505140	298806	312961	447227	486744	519823	318575	409407	455300	345618	170466	190592	579184	317536	276250	223377	331010	516736	218384	283782	228502	328108	243892	377153	264280	218026	218254	458622	352503
A0A075B5V1	A0A075B5V1;A0A075B5V6;A0A0A6YXA5;A0A0A6YWK5;A0A0A6YVW3;A0A075B5Y4;A0A075B5V2;A0A075B5V0;A0A075B5U7;P01757;P01756;P06330	Ighv1-31;Ighv1-42;Ighv1-15;Ighv1-23;Ighv1-81;Ighv1-34;Ighv1-26;Ighv1-22	Ig heavy chain V region J558;Ig heavy chain V region MOPC 104E;Ig heavy chain V region AC38 205.12	tr|A0A075B5V1|A0A075B5V1_MOUSE Immunoglobulin heavy variable 1-31 OS=Mus musculus OX=10090 GN=Ighv1-31 PE=4 SV=1;tr|A0A075B5V6|A0A075B5V6_MOUSE Immunoglobulin heavy variable V1-42 OS=Mus musculus OX=10090 GN=Ighv1-42 PE=1 SV=1;tr|A0A0A6YXA5|A0A0A6YXA5_MOUS	1	50087000	3638000	3636800	10048000	1455400	10458000	447227	486744	519823	4273800	3112100	2652000	345618	170466	190592	1058800	3563200	5094100	1764700	3021000	516736	218384	283782	228502	5449600	4312700	2100300	3257400	218026	218254	733510	352503
A0A075B5W2	A0A075B5W2;A0A0A6YXC3;A0A075B5X7;A0A075B5X0;A0A0G2JFS5;A0A0A6YXE0;A0A075B5X3;A0A075B5W3;A0A075B5T7;P01748	Ighv1-52;Ighv1-69;Ighv1-59;Ighv1-64;Ighv1-53;Ighv1-7	Ig heavy chain V region 23	tr|A0A075B5W2|A0A075B5W2_MOUSE Immunoglobulin heavy variable 1-52 OS=Mus musculus OX=10090 GN=Ighv1-52 PE=4 SV=1;tr|A0A0A6YXC3|A0A0A6YXC3_MOUSE Immunoglobulin heavy variable 1-52 (Fragment) OS=Mus musculus OX=10090 GN=Ighv1-52 PE=4 SV=1;tr|A0A075B5X7|A0A07	2	40172000	3222200	9094100	505140	298806	9333300	447227	486744	519823	318575	409407	455300	345618	170466	190592	579184	317536	276250	223377	331010	516736	218384	283782	228502	328108	2536400	377153	264280	218026	218254	458622	352503
A0A075B5W6	A0A075B5W6	Ighv1-55	Immunoglobulin heavy variable 1-55 (Fragment)	tr|A0A075B5W6|A0A075B5W6_MOUSE Immunoglobulin heavy variable 1-55 (Fragment) OS=Mus musculus OX=10090 GN=Ighv1-55 PE=1 SV=1	1	591246	598482	406906	505140	298806	17023000	447227	486744	519823	318575	409407	455300	345618	170466	190592	579184	317536	276250	223377	331010	20110000	218384	283782	228502	328108	243892	377153	264280	218026	218254	458622	352503
A0A075B663	A0A075B663;P01723;P01727;P01729;P01726	Iglv1	Ig lambda-1 chain V region;Ig lambda-1 chain V region S43;Ig lambda-2 chain V region MOPC 315;Ig lambda-1 chain V region H2020	tr|A0A075B663|A0A075B663_MOUSE Immunoglobulin lambda variable 1 (Fragment) OS=Mus musculus OX=10090 GN=Iglv1 PE=4 SV=1;sp|P01723|LV1A_MOUSE Ig lambda-1 chain V region OS=Mus musculus OX=10090 PE=1 SV=2;sp|P01727|LV1E_MOUSE Ig lambda-1 chain V region S43 OS	2	17054000	6788400	10820000	5000800	6408000	9356000	447227	486744	7844100	5675100	6208200	11370000	4942000	170466	6951700	579184	317536	4489900	4442300	5418700	516736	218384	283782	228502	328108	243892	5380300	264280	218026	218254	10849000	352503
A0A075B664	A0A075B664;P01728	Iglv2	Ig lambda-2 chain V region	tr|A0A075B664|A0A075B664_MOUSE Immunoglobulin lambda variable 2 OS=Mus musculus OX=10090 GN=Iglv2 PE=1 SV=1;sp|P01728|LV2A_MOUSE Ig lambda-2 chain V region OS=Mus musculus OX=10090 PE=3 SV=1	1	591246	598482	12533000	505140	298806	11605000	447227	486744	519823	318575	409407	455300	345618	170466	190592	8864600	317536	276250	223377	331010	516736	218384	283782	228502	328108	243892	377153	264280	218026	218254	458622	352503
A0A075B677	A0A075B677	Igkv4-53	Immunoglobulin kappa variable 4-53	tr|A0A075B677|A0A075B677_MOUSE Immunoglobulin kappa variable 4-53 OS=Mus musculus OX=10090 GN=Igkv4-53 PE=1 SV=1	1	591246	598482	406906	505140	298806	312961	447227	486744	519823	318575	409407	455300	345618	170466	190592	579184	317536	276250	223377	331010	516736	218384	283782	228502	328108	243892	377153	264280	218026	218254	458622	352503
A0A075B680	A0A075B680;A0A0G2JFL3;A0A0A6YXZ4	Ighv1-62-2	Immunoglobulin heavy variable 1-62-2	tr|A0A075B680|A0A075B680_MOUSE Immunoglobulin heavy variable 1-62-2 OS=Mus musculus OX=10090 GN=Ighv1-62-2 PE=4 SV=1;tr|A0A0G2JFL3|A0A0G2JFL3_MOUSE Immunoglobulin heavy variable 1-71 (Fragment) OS=Mus musculus OX=10090 GN=Ighv1-71 PE=4 SV=1;tr|A0A0A6YXZ4|A	2	2928300	598482	3295400	3420500	3736100	312961	447227	486744	3277100	8278800	409407	455300	345618	170466	190592	579184	317536	31302000	223377	2248700	516736	218384	283782	228502	328108	243892	377153	264280	218026	218254	458622	352503
A0A075B6A3	A0A075B6A3;A0A0A6YXW6	Igha	Immunoglobulin heavy constant alpha (Fragment)	tr|A0A075B6A3|A0A075B6A3_MOUSE Immunoglobulin heavy constant alpha (Fragment) OS=Mus musculus OX=10090 GN=Igha PE=1 SV=1;tr|A0A0A6YXW6|A0A0A6YXW6_MOUSE Immunoglobulin heavy constant alpha (Fragment) OS=Mus musculus OX=10090 GN=Igha PE=1 SV=1	3	13060000	598482	406906	505140	298806	312961	447227	486744	519823	318575	1184300	455300	345618	170466	190592	912290	1079800	276250	223377	331010	516736	218384	283782	228502	328108	243892	377153	264280	218026	218254	458622	352503
A0A075B6D5	A0A075B6D5;A0A0G2JFZ3	Igkv19-93	Immunoglobulin kappa chain variable 19-93	tr|A0A075B6D5|A0A075B6D5_MOUSE Immunoglobulin kappa chain variable 19-93 OS=Mus musculus OX=10090 GN=Igkv19-93 PE=1 SV=7;tr|A0A0G2JFZ3|A0A0G2JFZ3_MOUSE Immunoglobulin kappa chain variable 19-93 (Fragment) OS=Mus musculus OX=10090 GN=Igkv19-93 PE=1 SV=4	2	5266800	598482	406906	5239800	8706200	14349000	447227	486744	519823	318575	409407	455300	345618	170466	190592	579184	317536	276250	223377	331010	516736	218384	283782	228502	328108	243892	1765300	264280	218026	218254	458622	352503
A0A0A0MQC1	A0A0A0MQC1	Ighv3-5	Immunoglobulin heavy variable 3-5	tr|A0A0A0MQC1|A0A0A0MQC1_MOUSE Immunoglobulin heavy variable 3-5 OS=Mus musculus OX=10090 GN=Ighv3-5 PE=1 SV=1	1	16578000	598482	406906	5409700	298806	312961	447227	486744	519823	318575	409407	455300	345618	170466	190592	579184	317536	276250	223377	331010	516736	218384	283782	228502	328108	243892	377153	264280	218026	218254	458622	352503
A0A0A6YW40	A0A0A6YW40;A0A0A6YWX3;E9QM22;Q9D565-2;Q9D565-3;Q9D565	Wdr64	WD repeat-containing protein 64	tr|A0A0A6YW40|A0A0A6YW40_MOUSE WD repeat-containing protein 64 (Fragment) OS=Mus musculus OX=10090 GN=Wdr64 PE=4 SV=1;tr|A0A0A6YWX3|A0A0A6YWX3_MOUSE WD repeat-containing protein 64 OS=Mus musculus OX=10090 GN=Wdr64 PE=4 SV=1;tr|E9QM22|E9QM22_MOUSE WD repea	1	18157000	14698000	9427500	10600000	13809000	7419100	20625000	11653000	13408000	30438000	409407	455300	11621000	6343700	5476200	3709300	19474000	17451000	223377	5749900	23140000	218384	9753000	6661200	21890000	11235000	8405900	4766800	8247500	5287300	4556600	11070000
A0A0A6YW67	A0A0A6YW67;E9Q9J0;E9Q4P0;E9Q5F6;E9QNP0;Q5SX22;P62984;P62983;P0CG49;P0CG50	Gm8797;Uba52;Kxd1;Ubc;Ubb;Rps27a	Ubiquitin-60S ribosomal protein L40;Ubiquitin;60S ribosomal protein L40;Ubiquitin-40S ribosomal protein S27a;Ubiquitin;40S ribosomal protein S27a;Polyubiquitin-B;Ubiquitin;Polyubiquitin-C;Ubiquitin;Ubiquitin-related 1;Ubiquitin-related 2	tr|A0A0A6YW67|A0A0A6YW67_MOUSE Predicted pseudogene 8797 OS=Mus musculus OX=10090 GN=Gm8797 PE=4 SV=1;tr|E9Q9J0|E9Q9J0_MOUSE 60S ribosomal protein L40 (Fragment) OS=Mus musculus OX=10090 GN=Uba52 PE=3 SV=1;tr|E9Q4P0|E9Q4P0_MOUSE KxDL motif-containing prote	3	9490400	3824000	7169700	6841500	4670200	10618000	12447000	5407900	519823	2200700	13017000	15817000	7210400	6142400	190592	11894000	11460000	8218800	5431800	3324100	3737000	10897000	5864600	15958000	3019300	243892	377153	5061700	5255900	9757800	458622	3233200
A0A0A6YW77	A0A0A6YW77;P11672	Lcn2	Neutrophil gelatinase-associated lipocalin	tr|A0A0A6YW77|A0A0A6YW77_MOUSE Neutrophil gelatinase-associated lipocalin (Fragment) OS=Mus musculus OX=10090 GN=Lcn2 PE=1 SV=1;sp|P11672|NGAL_MOUSE Neutrophil gelatinase-associated lipocalin OS=Mus musculus OX=10090 GN=Lcn2 PE=1 SV=1	1	2987400	3831400	4176000	505140	298806	312961	447227	3066200	519823	318575	409407	455300	4328400	170466	190592	579184	317536	276250	2067000	5270100	516736	218384	283782	2432600	3695400	243892	377153	2202100	218026	218254	458622	352503
A0A0A6YWI9	A0A0A6YWI9	Ighv1-11	Immunoglobulin heavy variable V1-11 (Fragment)	tr|A0A0A6YWI9|A0A0A6YWI9_MOUSE Immunoglobulin heavy variable V1-11 (Fragment) OS=Mus musculus OX=10090 GN=Ighv1-11 PE=4 SV=1	2	591246	598482	406906	2128200	298806	312961	447227	486744	519823	318575	409407	455300	345618	170466	190592	579184	317536	276250	4297500	331010	516736	218384	283782	228502	328108	243892	377153	264280	218026	218254	458622	352503
A0A0A6YXN4	A0A0A6YXN4;A0A075B5U4	Ighv1-18	Immunoglobulin heavy variable V1-18 (Fragment)	tr|A0A0A6YXN4|A0A0A6YXN4_MOUSE Immunoglobulin heavy variable V1-18 (Fragment) OS=Mus musculus OX=10090 GN=Ighv1-18 PE=1 SV=1;tr|A0A075B5U4|A0A075B5U4_MOUSE Immunoglobulin heavy variable V1-18 OS=Mus musculus OX=10090 GN=Ighv1-18 PE=1 SV=1	3	30237000	2198300	2486400	6081500	1387100	2305200	447227	486744	519823	1867000	409407	455300	345618	170466	190592	579184	3124200	2388400	1318300	3474900	516736	218384	283782	228502	2963200	2298700	377153	1527700	218026	218254	458622	352503
A0A0A6YXQ0	A0A0A6YXQ0	Ighv8-8	Immunoglobulin heavy variable 8-8 (Fragment)	tr|A0A0A6YXQ0|A0A0A6YXQ0_MOUSE Immunoglobulin heavy variable 8-8 (Fragment) OS=Mus musculus OX=10090 GN=Ighv8-8 PE=4 SV=1	1	591246	598482	406906	505140	298806	312961	447227	486744	519823	318575	409407	455300	345618	170466	190592	579184	317536	276250	223377	331010	516736	218384	283782	228502	328108	243892	377153	264280	218026	218254	458622	352503
A0A0A6YYE7	A0A0A6YYE7;A0A0B4J1I3;A0A0A6YYE5;A0A075B5M4;A0A075B5L8	Igkv4-57	Immunoglobulin kappa variable 4-57 (Fragment)	tr|A0A0A6YYE7|A0A0A6YYE7_MOUSE Immunoglobulin kappa variable 4-57 (Fragment) OS=Mus musculus OX=10090 GN=Igkv4-57 PE=4 SV=2	3	11009000	598482	406906	6116100	298806	10911000	447227	486744	519823	318575	409407	455300	345618	170466	190592	579184	5823500	276250	6179500	331010	516736	218384	283782	228502	328108	243892	377153	264280	218026	218254	458622	352503
A0A0B4J1I1	A0A0B4J1I1	Igkv16-104	Immunoglobulin kappa variable 16-104 (Fragment)	tr|A0A0B4J1I1|A0A0B4J1I1_MOUSE Immunoglobulin kappa variable 16-104 (Fragment) OS=Mus musculus OX=10090 GN=Igkv16-104 PE=4 SV=1	1	24196000	598482	406906	505140	298806	7232000	447227	486744	519823	318575	409407	455300	345618	170466	190592	579184	317536	276250	223377	331010	516736	218384	283782	228502	328108	243892	377153	264280	218026	218254	458622	352503
A0A0B4J1I9	A0A0B4J1I9;A0A0B4J1I4;P04945	Igkv4-55;Igkv4-72	Ig kappa chain V-VI region NQ2-6.1	tr|A0A0B4J1I9|A0A0B4J1I9_MOUSE Immunoglobulin kappa variable 4-55 (Fragment) OS=Mus musculus OX=10090 GN=Igkv4-55 PE=1 SV=1;tr|A0A0B4J1I4|A0A0B4J1I4_MOUSE Immunoglobulin kappa chain variable 4-72 (Fragment) OS=Mus musculus OX=10090 GN=Igkv4-72 PE=4 SV=1;sp	1	12844000	5857500	406906	4231400	298806	30348000	447227	486744	519823	318575	409407	455300	345618	170466	190592	579184	13950000	5170000	2065200	331010	516736	218384	283782	228502	5463500	2259600	377153	264280	218026	218254	458622	352503
A0A0B4J1J2	A0A0B4J1J2	Igkv5-43	Immunoglobulin kappa chain variable 5-43 (Fragment)	tr|A0A0B4J1J2|A0A0B4J1J2_MOUSE Immunoglobulin kappa chain variable 5-43 (Fragment) OS=Mus musculus OX=10090 GN=Igkv5-43 PE=1 SV=1	1	591246	598482	406906	505140	298806	312961	447227	486744	519823	318575	409407	455300	345618	170466	190592	579184	317536	276250	223377	331010	516736	218384	283782	228502	328108	243892	377153	264280	218026	218254	458622	352503
A0A0B4J1J6	A0A0B4J1J6;A0A075B5T6	Ighv10-1	Immunoglobulin heavy variable 10-1 (Fragment)	tr|A0A0B4J1J6|A0A0B4J1J6_MOUSE Immunoglobulin heavy variable 10-1 (Fragment) OS=Mus musculus OX=10090 GN=Ighv10-1 PE=4 SV=1	3	20460000	1775700	12974000	505140	1549100	1442900	1327700	1053300	1441500	318575	1806900	455300	1343200	170466	190592	4863400	317536	276250	1455700	3230300	516736	1851700	283782	228502	1005300	1336000	377153	264280	218026	218254	458622	576980
A0A0G2JDM6	A0A0G2JDM6;P21836	Ache	Acetylcholinesterase	tr|A0A0G2JDM6|A0A0G2JDM6_MOUSE Carboxylic ester hydrolase OS=Mus musculus OX=10090 GN=Ache PE=1 SV=1;sp|P21836|ACES_MOUSE Acetylcholinesterase OS=Mus musculus OX=10090 GN=Ache PE=1 SV=1	1	591246	598482	406906	1063900	298806	312961	447227	486744	519823	318575	4664000	1904400	345618	3027700	190592	2220500	317536	276250	2785400	331010	516736	2536100	283782	2024500	328108	243892	1372600	1513900	218026	218254	458622	352503
A0A0G2JGC1	A0A0G2JGC1;A0A0G2JFF1;P63087;P62141;P62137;P63087-2	Ppp1cc;Ppp1cb;Ppp1ca	Serine/threonine-protein phosphatase PP1-gamma catalytic subunit;Serine/threonine-protein phosphatase PP1-beta catalytic subunit;Serine/threonine-protein phosphatase PP1-alpha catalytic subunit	tr|A0A0G2JGC1|A0A0G2JGC1_MOUSE Serine/threonine-protein phosphatase OS=Mus musculus OX=10090 GN=Ppp1cc PE=1 SV=1;tr|A0A0G2JFF1|A0A0G2JFF1_MOUSE Serine/threonine-protein phosphatase (Fragment) OS=Mus musculus OX=10090 GN=Ppp1cc PE=1 SV=1;sp|P63087|PP1G_MOUS	1	1122900	820760	2071100	505140	740220	1129200	1259300	976610	519823	318575	1108800	455300	345618	170466	190592	1192700	317536	276250	223377	331010	516736	218384	283782	228502	328108	243892	377153	665080	218026	218254	458622	352503
A0A0G2JGQ8	A0A0G2JGQ8;P01845	Iglc3	Ig lambda-3 chain C region	tr|A0A0G2JGQ8|A0A0G2JGQ8_MOUSE Ig lambda-3 chain C region (Fragment) OS=Mus musculus OX=10090 GN=Iglc3 PE=1 SV=1;sp|P01845|LAC3_MOUSE Ig lambda-3 chain C region OS=Mus musculus OX=10090 GN=Iglc3 PE=1 SV=1	1	5346600	598482	3557800	505140	298806	6536000	447227	486744	519823	318575	409407	2514500	345618	2381100	190592	579184	317536	276250	1569900	331010	516736	218384	283782	228502	328108	243892	377153	264280	218026	218254	458622	352503
A0A0G2JGT0	A0A0G2JGT0;A0A075B5N6;A0A0G2JDG9	Igkv8-16	Immunoglobulin kappa variable 8-16	tr|A0A0G2JGT0|A0A0G2JGT0_MOUSE Predicted gene 43218 (Fragment) OS=Mus musculus OX=10090 GN=Gm43218 PE=4 SV=4;tr|A0A075B5N6|A0A075B5N6_MOUSE Immunoglobulin kappa variable 8-16 OS=Mus musculus OX=10090 GN=Igkv8-16 PE=4 SV=7;tr|A0A0G2JDG9|A0A0G2JDG9_MOUSE Imm	1	2586100	598482	406906	33604000	298806	312961	447227	486744	519823	318575	409407	455300	345618	170466	190592	579184	317536	276250	223377	331010	516736	218384	283782	228502	328108	243892	377153	264280	218026	218254	458622	352503
A0A0N4SVX1	A0A0N4SVX1;A0A0N4SWI2;P35230	Reg3b	Regenerating islet-derived protein 3-beta;Regenerating islet-derived protein 3-beta 16.5 kDa form;Regenerating islet-derived protein 3-beta 15 kDa form	tr|A0A0N4SVX1|A0A0N4SVX1_MOUSE Regenerating islet-derived protein 3-beta (Fragment) OS=Mus musculus OX=10090 GN=Reg3b PE=1 SV=1;tr|A0A0N4SWI2|A0A0N4SWI2_MOUSE Regenerating islet-derived protein 3-beta (Fragment) OS=Mus musculus OX=10090 GN=Reg3b PE=1 SV=1;	1	4707600	598482	406906	505140	298806	2390100	5648900	486744	519823	318575	3822500	455300	6310700	170466	190592	3005500	317536	276250	223377	331010	516736	8565100	283782	228502	328108	243892	2976800	2794400	6226600	218254	458622	352503
A0A0R4J0F8	A0A0R4J0F8;Q66K08	Cilp	Cartilage intermediate layer protein 1;Cartilage intermediate layer protein 1 C1;Cartilage intermediate layer protein 1 C2	tr|A0A0R4J0F8|A0A0R4J0F8_MOUSE Cartilage intermediate layer protein 1 OS=Mus musculus OX=10090 GN=Cilp PE=1 SV=1;sp|Q66K08|CILP1_MOUSE Cartilage intermediate layer protein 1 OS=Mus musculus OX=10090 GN=Cilp PE=1 SV=1	1	591246	1371900	969870	505140	298806	1174800	1250100	991630	925400	318575	409407	455300	345618	170466	695560	1590200	317536	276250	223377	331010	818790	218384	283782	228502	328108	243892	377153	264280	218026	218254	458622	352503
A0A0R4J0M4	A0A0R4J0M4;Q91V80	Apof	Apolipoprotein F	tr|A0A0R4J0M4|A0A0R4J0M4_MOUSE Apolipoprotein F OS=Mus musculus OX=10090 GN=Apof PE=1 SV=1;sp|Q91V80|APOF_MOUSE Apolipoprotein F OS=Mus musculus OX=10090 GN=Apof PE=2 SV=2	3	6179400	14205000	6057800	5997800	12405000	3162000	6320900	6168800	5375000	318575	5718100	3522900	7590700	5922800	4860100	3318400	7698800	9380500	3733200	6108900	7732100	4520500	9792000	5842200	6979100	2167500	5721000	5275600	4570300	4511100	458622	2439500
A0A0R4J107	A0A0R4J107;Q8R146-2;Q8R146	Apeh	Acylamino-acid-releasing enzyme	tr|A0A0R4J107|A0A0R4J107_MOUSE Acyl-peptide hydrolase (Fragment) OS=Mus musculus OX=10090 GN=Apeh PE=1 SV=1;sp|Q8R146-2|APEH_MOUSE Isoform 2 of Acylamino-acid-releasing enzyme OS=Mus musculus OX=10090 GN=Apeh;sp|Q8R146|APEH_MOUSE Acylamino-acid-releasing e	2	591246	598482	406906	505140	298806	3221800	4034000	486744	519823	318575	4003100	6038500	345618	170466	190592	579184	317536	276250	223377	331010	516736	218384	283782	228502	328108	243892	377153	264280	1969900	218254	458622	352503
A0A0R4J256	A0A0R4J256;P28076	Psmb9	Proteasome subunit beta type-9	tr|A0A0R4J256|A0A0R4J256_MOUSE Proteasome subunit beta OS=Mus musculus OX=10090 GN=Psmb9 PE=1 SV=1;sp|P28076|PSB9_MOUSE Proteasome subunit beta type-9 OS=Mus musculus OX=10090 GN=Psmb9 PE=1 SV=1	1	7526500	598482	406906	3936900	298806	7483500	447227	486744	519823	4043200	14704000	455300	345618	170466	190592	5088100	317536	276250	223377	331010	516736	218384	283782	228502	328108	243892	377153	264280	218026	218254	458622	352503
A0A0U1RNJ1	A0A0U1RNJ1;P19096	Fasn	Fatty acid synthase;[Acyl-carrier-protein] S-acetyltransferase;[Acyl-carrier-protein] S-malonyltransferase;3-oxoacyl-[acyl-carrier-protein] synthase;3-oxoacyl-[acyl-carrier-protein] reductase;3-hydroxyacyl-[acyl-carrier-protein] dehydratase;Enoyl-[acyl-carrier-protein] reductase;Oleoyl-[acyl-carrier-protein] hydrolase	tr|A0A0U1RNJ1|A0A0U1RNJ1_MOUSE 3-hydroxyacyl-[acyl-carrier-protein] dehydratase OS=Mus musculus OX=10090 GN=Fasn PE=1 SV=1;sp|P19096|FAS_MOUSE Fatty acid synthase OS=Mus musculus OX=10090 GN=Fasn PE=1 SV=2	4	1061700	598482	665600	505140	298806	1799300	447227	486744	519823	318575	1484700	3479200	345618	170466	190592	1184900	317536	276250	223377	331010	516736	218384	283782	228502	328108	243892	377153	608330	218026	218254	458622	352503
A0A0U1RPF4	A0A0U1RPF4;Q5M9M1;Q80T19	Hamp2	Hepcidin-2	tr|A0A0U1RPF4|A0A0U1RPF4_MOUSE Hepcidin-2 (Fragment) OS=Mus musculus OX=10090 GN=Hamp2 PE=3 SV=1;tr|Q5M9M1|Q5M9M1_MOUSE Hepcidin antimicrobial peptide 2 OS=Mus musculus OX=10090 GN=Hamp2 PE=2 SV=1;sp|Q80T19|HEPC2_MOUSE Hepcidin-2 OS=Mus musculus OX=10090 G	2	3867100	3059800	7501600	3202700	298806	1911100	3085600	486744	3301000	4140300	2301100	2465400	2110700	170466	190592	579184	317536	276250	223377	2647600	3678900	218384	283782	2233600	328108	243892	377153	264280	2756800	218254	458622	352503
A0A140T8M2	A0A140T8M2;P01636	Igkv12-44	Ig kappa chain V-V region MOPC 149	tr|A0A140T8M2|A0A140T8M2_MOUSE Immunoglobulin kappa variable 12-44 (Fragment) OS=Mus musculus OX=10090 GN=Igkv12-44 PE=4 SV=2;sp|P01636|KV5A4_MOUSE Ig kappa chain V-V region MOPC 149 OS=Mus musculus OX=10090 PE=1 SV=1	2	4511100	623690	406906	505140	10831000	2372500	447227	486744	519823	318575	409407	455300	345618	170466	190592	579184	317536	734160	223377	331010	516736	218384	283782	228502	261230	243892	377153	264280	218026	218254	458622	352503
A0A140T8M4	A0A140T8M4	Igkv8-19	Immunoglobulin kappa variable 8-19	tr|A0A140T8M4|A0A140T8M4_MOUSE Immunoglobulin kappa variable 8-19 OS=Mus musculus OX=10090 GN=Igkv8-19 PE=1 SV=2	1	591246	598482	406906	505140	298806	312961	447227	486744	519823	318575	409407	455300	345618	170466	190592	579184	317536	276250	223377	331010	516736	218384	283782	228502	328108	243892	377153	264280	218026	218254	458622	352503
A0A140T8M5	A0A140T8M5	Igkv6-15	Immunoglobulin kappa variable 6-15 (Fragment)	tr|A0A140T8M5|A0A140T8M5_MOUSE Immunoglobulin kappa variable 6-15 (Fragment) OS=Mus musculus OX=10090 GN=Igkv6-15 PE=1 SV=2	3	72017000	598482	406906	505140	298806	312961	447227	486744	519823	318575	409407	455300	345618	170466	190592	579184	317536	4999800	223377	331010	516736	218384	283782	228502	328108	243892	377153	264280	218026	218254	458622	352503
A0A140T8M9	A0A140T8M9;A0A140T8M0;A0A0B4J1I0;A0A075B5N0;A0A075B5K8;F6XWB2;A0A140T8N1;A0A0G2JDE5;P01631	Igkv1-110;Igkv1-35;Igkv1-99;Igkv1-115	Ig kappa chain V-II region 26-10	tr|A0A140T8M9|A0A140T8M9_MOUSE Immunoglobulin kappa chain variable 1-122 (Fragment) OS=Mus musculus OX=10090 GN=Igkv1-122 PE=4 SV=2;tr|A0A140T8M0|A0A140T8M0_MOUSE Immunoglobulin kappa variable 1-117 (Fragment) OS=Mus musculus OX=10090 GN=Igkv1-117 PE=4 SV=	1	45039000	8114100	14397000	12757000	52700000	11692000	3181600	2247400	4591200	5061700	6702800	3687400	345618	170466	190592	4921000	6763400	6924900	5861900	4519200	516736	4305600	283782	228502	3790200	3356000	2978500	2520100	218026	218254	458622	352503
A0A140T8N0	A0A140T8N0;P01639	Gm5571	Ig kappa chain V-V region MOPC 41	tr|A0A140T8N0|A0A140T8N0_MOUSE Immunoglobulin kappa chain variable 9-120 (Fragment) OS=Mus musculus OX=10090 GN=Igkv9-120 PE=1 SV=2;sp|P01639|KV5A7_MOUSE Ig kappa chain V-V region MOPC 41 OS=Mus musculus OX=10090 GN=Gm5571 PE=1 SV=1	2	4850900	598482	406906	2989800	298806	55331000	447227	486744	519823	318575	3145700	455300	345618	170466	190592	579184	317536	276250	223377	331010	516736	218384	283782	228502	328108	243892	377153	264280	218026	218254	458622	352503
A0A140T8P6	A0A140T8P6;P01635	Igkv12-46	Immunoglobulin kappa variable 12-46 (Fragment)	tr|A0A140T8P6|A0A140T8P6_MOUSE Immunoglobulin kappa variable 12-46 (Fragment) OS=Mus musculus OX=10090 GN=Igkv12-46 PE=1 SV=2	3	62646000	1586000	406906	494800	298806	507750	447227	486744	519823	318575	409407	455300	345618	170466	190592	579184	536220	276250	860860	331010	516736	218384	283782	228502	328108	243892	377153	264280	218026	218254	458622	352503
A0A1B0GQV5	A0A1B0GQV5;P05367	Saa2	Serum amyloid A-2 protein;Amyloid protein A	tr|A0A1B0GQV5|A0A1B0GQV5_MOUSE Serum amyloid A protein OS=Mus musculus OX=10090 GN=Saa2 PE=1 SV=1;sp|P05367|SAA2_MOUSE Serum amyloid A-2 protein OS=Mus musculus OX=10090 GN=Saa2 PE=1 SV=1	2	2066500	28061000	406906	1413200	1245000	312961	952280	940930	2224600	1848800	409407	455300	345618	2621600	190592	942170	317536	276250	1106200	309960000	901240	1335000	1088300	1026300	1773700	243892	826260	1307700	991860	218254	458622	352503
A0A1B0GR11	A0A1B0GR11;Q93092	Taldo1	Transaldolase	tr|A0A1B0GR11|A0A1B0GR11_MOUSE Transaldolase OS=Mus musculus OX=10090 GN=Taldo1 PE=1 SV=1;sp|Q93092|TALDO_MOUSE Transaldolase OS=Mus musculus OX=10090 GN=Taldo1 PE=1 SV=2	5	1913400	2236400	2233200	1573800	1773800	3066700	1612000	1085400	833260	318575	1428300	2016000	1592100	1525100	190592	1858400	2009900	1302500	223377	1208900	1068100	1572200	1084300	1672000	706900	741060	912720	1120800	973570	1387200	658020	683160
A0A1B0GT50	A0A1B0GT50;Q9Z0M9	Il18bp	Interleukin-18-binding protein	tr|A0A1B0GT50|A0A1B0GT50_MOUSE Interleukin-18-binding protein OS=Mus musculus OX=10090 GN=Il18bp PE=1 SV=1;sp|Q9Z0M9|I18BP_MOUSE Interleukin-18-binding protein OS=Mus musculus OX=10090 GN=Il18bp PE=1 SV=2	1	33860000	24243000	30658000	23881000	18065000	30697000	21888000	17016000	14574000	19253000	38819000	14779000	26613000	33743000	20650000	17227000	16034000	21013000	13076000	17765000	15258000	22561000	15386000	10513000	14517000	12623000	19102000	7731000	15824000	15765000	13344000	8280000
A0A1D5RM32	A0A1D5RM32;A0A1D5RML1;P31428	Dpep1	Dipeptidase 1	tr|A0A1D5RM32|A0A1D5RM32_MOUSE Dipeptidase (Fragment) OS=Mus musculus OX=10090 GN=Dpep1 PE=1 SV=1;tr|A0A1D5RML1|A0A1D5RML1_MOUSE Dipeptidase (Fragment) OS=Mus musculus OX=10090 GN=Dpep1 PE=1 SV=1;sp|P31428|DPEP1_MOUSE Dipeptidase 1 OS=Mus musculus OX=10090	1	21697000	598482	406906	505140	298806	312961	447227	6807500	519823	318575	12376000	10812000	345618	13656000	8573400	9581100	317536	19520000	223377	331010	516736	9887200	9223500	7362200	328108	5472700	377153	5633500	218026	9403800	8289700	352503
A0A1L1SSC4	A0A1L1SSC4;Q8C7G5;A0A1L1SSE5;A0A1L1SQP3	Apoa5	Apolipoprotein A-V	tr|A0A1L1SSC4|A0A1L1SSC4_MOUSE Apolipoprotein A-V (Fragment) OS=Mus musculus OX=10090 GN=Apoa5 PE=1 SV=1;sp|Q8C7G5|APOA5_MOUSE Apolipoprotein A-V OS=Mus musculus OX=10090 GN=Apoa5 PE=1 SV=1;tr|A0A1L1SSE5|A0A1L1SSE5_MOUSE Apolipoprotein A-V (Fragment) OS=Mu	2	1098800	1911100	406906	1708800	298806	312961	2269100	1940000	519823	1284800	409407	455300	1303700	170466	190592	579184	710040	1352600	223377	1276400	1314200	1000300	1436500	1368700	1247700	1241200	377153	1365400	1450600	218254	458622	352503
A0A1W2P7F1	A0A1W2P7F1;Q8CFG8	C1sb	Complement C1s-B subcomponent;Complement C1s-B subcomponent heavy chain;Complement C1s-B subcomponent light chain	tr|A0A1W2P7F1|A0A1W2P7F1_MOUSE Complement component 1, s subcomponent 2 OS=Mus musculus OX=10090 GN=C1s2 PE=1 SV=1;sp|Q8CFG8|CS1B_MOUSE Complement C1s-B subcomponent OS=Mus musculus OX=10090 GN=C1sb PE=2 SV=1	1	51243000	41405000	48762000	38163000	47532000	39250000	37185000	34973000	41574000	43390000	36889000	17283000	43566000	47429000	43662000	37910000	52829000	49788000	34816000	35825000	56085000	47822000	37187000	37438000	41990000	28586000	36186000	25924000	41806000	41063000	43507000	37116000
A0A2I3BPW7	A0A2I3BPW7;O89051	Itm2b	Integral membrane protein 2B;BRI2, membrane form;BRI2 intracellular domain;BRI2C, soluble form;Bri23 peptide	tr|A0A2I3BPW7|A0A2I3BPW7_MOUSE Integral membrane protein 2 (Fragment) OS=Mus musculus OX=10090 GN=Itm2b PE=1 SV=1;sp|O89051|ITM2B_MOUSE Integral membrane protein 2B OS=Mus musculus OX=10090 GN=Itm2b PE=1 SV=1	1	1734600	892790	2076100	939080	1166600	962300	1350700	486744	686920	318575	1032200	1265400	1097400	1371300	1059900	1744800	1498000	1269900	223377	870060	971850	970730	1136300	1239100	651280	787670	830440	593450	1113100	1178900	458622	692230
A0A2I3BRZ3	A0A2I3BRZ3	Klhl33	Kelch-like 33	tr|A0A2I3BRZ3|A0A2I3BRZ3_MOUSE Kelch-like 33 OS=Mus musculus OX=10090 GN=Klhl33 PE=4 SV=1	1	591246	19436000	18722000	18069000	298806	312961	447227	9248100	10864000	318575	9262400	7860900	11930000	16537000	11831000	579184	317536	9190700	8608900	331010	516736	10381000	283782	15376000	328108	243892	8802900	264280	218026	9239000	13277000	7580700
A0A2R8VHP2	A0A2R8VHP2;Q8CC86	Naprt	Nicotinate phosphoribosyltransferase	tr|A0A2R8VHP2|A0A2R8VHP2_MOUSE Nicotinate phosphoribosyltransferase OS=Mus musculus OX=10090 GN=Naprt PE=1 SV=1;sp|Q8CC86|PNCB_MOUSE Nicotinate phosphoribosyltransferase OS=Mus musculus OX=10090 GN=Naprt PE=1 SV=1	1	591246	598482	3022100	505140	298806	312961	1810200	1336900	519823	318575	2564000	455300	345618	170466	190592	579184	317536	276250	223377	331010	516736	218384	283782	228502	328108	243892	377153	1430900	218026	218254	458622	352503
A0A338P6D4	A0A338P6D4;E9Q7X6-3;E9Q7X6-2;E9Q7X6	Heg1	Protein HEG homolog 1	tr|A0A338P6D4|A0A338P6D4_MOUSE Protein HEG homolog 1 OS=Mus musculus OX=10090 GN=Heg1 PE=1 SV=1;sp|E9Q7X6-3|HEG1_MOUSE Isoform 3 of Protein HEG homolog 1 OS=Mus musculus OX=10090 GN=Heg1;sp|E9Q7X6-2|HEG1_MOUSE Isoform 2 of Protein HEG homolog 1 OS=Mus musc	1	591246	598482	406906	505140	298806	2651000	3749700	486744	519823	318575	409407	455300	345618	3925400	190592	2760600	1981200	2765900	223377	331010	516736	218384	283782	228502	328108	243892	377153	264280	218026	218254	458622	352503
A0A494B908	A0A494B908;A0A494BAW2;P19157;P46425;A0A494BAS3;A0A494BAU3;A0A494BAM8;Q8VC73;F6RWR5	Gstp1;Gstp2	Glutathione S-transferase P 1;Glutathione S-transferase P 2	tr|A0A494B908|A0A494B908_MOUSE GST class-pi (Fragment) OS=Mus musculus OX=10090 GN=Gstp1 PE=1 SV=1;tr|A0A494BAW2|A0A494BAW2_MOUSE GST class-pi OS=Mus musculus OX=10090 GN=Gstp1 PE=1 SV=1;sp|P19157|GSTP1_MOUSE Glutathione S-transferase P 1 OS=Mus musculus O	5	1061300	598482	1610300	505140	1153200	312961	447227	486744	519823	318575	409407	6412500	1246600	170466	190592	1844700	317536	1473900	223377	331010	813790	218384	3271400	228502	328108	243892	1267300	45170000	218026	218254	458622	352503
A0A494B952	A0A494B952;Q91V64	Isoc1	Isochorismatase domain-containing protein 1	tr|A0A494B952|A0A494B952_MOUSE Isochorismatase domain-containing protein 1 OS=Mus musculus OX=10090 GN=Isoc1 PE=1 SV=1;sp|Q91V64|ISOC1_MOUSE Isochorismatase domain-containing protein 1 OS=Mus musculus OX=10090 GN=Isoc1 PE=1 SV=1	3	6137400	3675600	3022800	2363500	3181800	12149000	3404300	1945400	1735800	318575	1009600	3392600	2320800	170466	1608800	3505600	3078800	2371900	223377	3128300	2177500	218384	283782	228502	328108	1845300	2016100	264280	2996100	218254	458622	1476000
A0A494BA59	A0A494BA59;Q5BKQ4	Pnliprp1	Inactive pancreatic lipase-related protein 1	tr|A0A494BA59|A0A494BA59_MOUSE Inactive pancreatic lipase-related protein 1 (Fragment) OS=Mus musculus OX=10090 GN=Pnliprp1 PE=1 SV=1;sp|Q5BKQ4|LIPR1_MOUSE Inactive pancreatic lipase-related protein 1 OS=Mus musculus OX=10090 GN=Pnliprp1 PE=1 SV=2	2	1368100	1400300	406906	505140	4575600	312961	447227	486744	519823	318575	409407	455300	345618	2177900	190592	579184	317536	276250	223377	331010	516736	1315100	283782	1744700	328108	243892	377153	264280	1127500	218254	458622	352503
A0A494BBB9	A0A494BBB9;G5E852;Q62120	Jak2	Tyrosine-protein kinase;Tyrosine-protein kinase JAK2	tr|A0A494BBB9|A0A494BBB9_MOUSE Tyrosine-protein kinase (Fragment) OS=Mus musculus OX=10090 GN=Jak2 PE=1 SV=1;tr|G5E852|G5E852_MOUSE Tyrosine-protein kinase OS=Mus musculus OX=10090 GN=Jak2 PE=1 SV=1;sp|Q62120|JAK2_MOUSE Tyrosine-protein kinase JAK2 OS=Mus	1	591246	11893000	11480000	10343000	298806	7871200	447227	12526000	7785100	15747000	8016600	7329700	5793400	16036000	19178000	4749900	317536	5302000	14510000	7409700	516736	218384	8849200	6381400	7818000	10060000	17167000	7898100	10846000	6556300	16845000	16857000
A0A494BBJ8	A0A494BBJ8;A0A494B9W3;Q8K1B8;A0A494B9F7	Fermt3	Fermitin family homolog 3	tr|A0A494BBJ8|A0A494BBJ8_MOUSE Fermitin family homolog 3 OS=Mus musculus OX=10090 GN=Fermt3 PE=1 SV=1;tr|A0A494B9W3|A0A494B9W3_MOUSE Fermitin family homolog 3 OS=Mus musculus OX=10090 GN=Fermt3 PE=1 SV=1;sp|Q8K1B8|URP2_MOUSE Fermitin family homolog 3 OS=Mu	2	591246	598482	4770700	2013700	298806	312961	4721600	2630700	519823	318575	6019700	455300	345618	170466	190592	579184	317536	3094700	2537100	331010	516736	218384	283782	228502	328108	243892	377153	264280	218026	2275800	458622	2112200
A0A5F8MPD3	A0A5F8MPD3;O35426;O35426-2	Xbp1	X-box-binding protein 1;X-box-binding protein 1, cytoplasmic form;X-box-binding protein 1, luminal form	tr|A0A5F8MPD3|A0A5F8MPD3_MOUSE X-box-binding protein 1 OS=Mus musculus OX=10090 GN=Xbp1 PE=1 SV=1;sp|O35426|XBP1_MOUSE X-box-binding protein 1 OS=Mus musculus OX=10090 GN=Xbp1 PE=1 SV=2;sp|O35426-2|XBP1_MOUSE Isoform 2 of X-box-binding protein 1 OS=Mus mus	1	591246	598482	406906	505140	12950000	6794200	8338900	12837000	8288400	5163500	8770700	6114700	9272300	10942000	19143000	10281000	13954000	16558000	11403000	11673000	15591000	16611000	21075000	19474000	18496000	243892	21861000	13187000	218026	20906000	22748000	15143000
A2A817	A2A817;A2A816;A2A815;A2A813;Q99LX0	Park7	Protein deglycase DJ-1	tr|A2A817|A2A817_MOUSE Parkinson disease protein 7 homolog (Fragment) OS=Mus musculus OX=10090 GN=Park7 PE=1 SV=1;tr|A2A816|A2A816_MOUSE Parkinson disease protein 7 homolog (Fragment) OS=Mus musculus OX=10090 GN=Park7 PE=1 SV=1;tr|A2A815|A2A815_MOUSE Maill	1	3108700	598482	406906	505140	298806	312961	2844300	486744	1525500	318575	4451900	2468400	345618	170466	190592	2485400	317536	276250	223377	331010	516736	2576100	283782	3673200	328108	243892	377153	1355600	218026	218254	458622	352503
A2AKN8	A2AKN8;E9PVW0;B8JI96;A2BIN0;P11591	Mup8;Mup14;Mup11	Major urinary protein 8	tr|A2AKN8|A2AKN8_MOUSE Major urinary protein 5 OS=Mus musculus OX=10090 GN=Mup8 PE=3 SV=1;tr|E9PVW0|E9PVW0_MOUSE Major urinary protein 8 OS=Mus musculus OX=10090 GN=Mup8 PE=3 SV=2;tr|B8JI96|B8JI96_MOUSE Major urinary protein 14 (Fragment) OS=Mus musculus O	1	591246	598482	406906	505140	298806	312961	447227	486744	519823	318575	409407	455300	345618	170466	190592	579184	3990700	1055500	6227400	6382900	26717000	10681000	54689000	31593000	68932000	1414400	49070000	52011000	35583000	9313500	11769000	23586000
A2AKN9	A2AKN9;A2BIM8;P02762;P04938;A9C497;A9C496	Mup4;Mup9;Mup6;Mup8;Mup19	Major urinary protein 6;Major urinary proteins 11 and 8	tr|A2AKN9|A2AKN9_MOUSE Major urinary protein 2 OS=Mus musculus OX=10090 GN=Mup2 PE=1 SV=1;sp|A2BIM8|MUP18_MOUSE Major urinary protein 18 OS=Mus musculus OX=10090 GN=Mup18 PE=3 SV=1;sp|P02762|MUP6_MOUSE Major urinary protein 6 OS=Mus musculus OX=10090 GN=Mu	1	591246	14593000	14650000	9874500	56696000	450500	11083000	10698000	7077900	23570000	3876500	25372000	10366000	7477300	7800400	579184	105890000	34129000	133940000	168580000	316800000	207930000	713250000	607930000	565620000	17399000	736700000	594840000	470220000	202170000	205940000	276650000
A2AM05-4	A2AM05-4;A2AM05	Cntln	Centlein	sp|A2AM05-4|CNTLN_MOUSE Isoform 4 of Centlein OS=Mus musculus OX=10090 GN=Cntln;sp|A2AM05|CNTLN_MOUSE Centlein OS=Mus musculus OX=10090 GN=Cntln PE=1 SV=1	1	591246	598482	4830800	505140	298806	312961	447227	486744	519823	318575	409407	3080300	345618	170466	4283200	579184	317536	6492800	3903000	6673200	516736	5483400	7673300	7937500	328108	243892	6499800	5917900	4231500	4416200	3492800	4870000
A2BHD2	A2BHD2;A2AEP0	Gm14743;Obp1b	Odorant-binding protein 1b	tr|A2BHD2|A2BHD2_MOUSE Predicted gene 14743 OS=Mus musculus OX=10090 GN=Gm14743 PE=3 SV=1;sp|A2AEP0|OBP1B_MOUSE Odorant-binding protein 1b OS=Mus musculus OX=10090 GN=Obp1b PE=1 SV=1	1	591246	4032400	406906	6622400	298806	312961	447227	486744	519823	318575	2362900	455300	345618	170466	190592	579184	317536	276250	223377	331010	516736	3207100	283782	228502	328108	243892	377153	264280	218026	218254	458622	352503
A2BIN1	A2BIN1;Q4FZE8	Mup10;Mup1	Major urinary protein 10	tr|A2BIN1|A2BIN1_MOUSE Major urinary protein 10 OS=Mus musculus OX=10090 GN=Mup10 PE=2 SV=1;tr|Q4FZE8|Q4FZE8_MOUSE Major urinary protein 1 OS=Mus musculus OX=10090 GN=Mup22 PE=2 SV=1	1	42299000	113050000	97630000	505140	212050000	47253000	129680000	99901000	115800000	121270000	107220000	102230000	182930000	129120000	113640000	23344000	287390000	227860000	190080000	199710000	332180000	267860000	310460000	252570000	357080000	59133000	340490000	194390000	329330000	252950000	197870000	161750000
A2CEK3	A2CEK3;Q9D0F9	Pgm2;Pgm1	Phosphoglucomutase-1	tr|A2CEK3|A2CEK3_MOUSE Phosphoglucomutase-1 OS=Mus musculus OX=10090 GN=Pgm1 PE=1 SV=1;sp|Q9D0F9|PGM1_MOUSE Phosphoglucomutase-1 OS=Mus musculus OX=10090 GN=Pgm1 PE=1 SV=4	2	1193600	598482	1165300	505140	298806	312961	447227	486744	519823	318575	409407	1540100	345618	170466	190592	1427900	317536	276250	223377	331010	516736	218384	283782	228502	328108	243892	377153	264280	218026	218254	458622	352503
A6X935	A6X935;E9Q5L2;A6X935-2;CON__Q3T052	Itih4	Inter alpha-trypsin inhibitor, heavy chain 4	sp|A6X935|ITIH4_MOUSE Inter alpha-trypsin inhibitor, heavy chain 4 OS=Mus musculus OX=10090 GN=Itih4 PE=1 SV=2;tr|E9Q5L2|E9Q5L2_MOUSE Inter alpha-trypsin inhibitor, heavy chain 4 OS=Mus musculus OX=10090 GN=Itih4 PE=1 SV=1;sp|A6X935-2|ITIH4_MOUSE Isoform 2	1	538030000	492520000	408750000	352140000	293500000	296490000	297860000	234590000	307410000	282420000	324410000	194090000	341500000	117290000	240620000	273480000	374920000	353850000	218550000	539690000	240920000	289150000	226770000	203130000	428840000	303360000	202260000	188270000	271690000	235420000	131710000	128880000
A6XA75	A6XA75;Q8K558;Q8K558-2	Treml1	Trem-like transcript 1 protein	tr|A6XA75|A6XA75_MOUSE Trem-like transcript 1 protein OS=Mus musculus OX=10090 GN=Treml1 PE=1 SV=1;sp|Q8K558|TRML1_MOUSE Trem-like transcript 1 protein OS=Mus musculus OX=10090 GN=Treml1 PE=1 SV=2;sp|Q8K558-2|TRML1_MOUSE Isoform 2 of Trem-like transcript 1	2	2627900	598482	7597800	4024800	5157600	8188200	2902700	2698100	1970700	318575	37922000	17542000	5195500	5403700	4762800	7196200	4008400	3573600	21663000	7331100	516736	30860000	283782	4159700	328108	243892	7648100	5992800	8859000	12599000	2248900	352503
A9R9W0	A9R9W0;A2CEL1;P11588;A2CEL0;L7MUC7;A2CEK9	Mup15;Mup1;Mup7	Major urinary protein 1	tr|A9R9W0|A9R9W0_MOUSE Major urinary protein 15 OS=Mus musculus OX=10090 GN=Mup15 PE=3 SV=1;tr|A2CEL1|A2CEL1_MOUSE Major urinary protein 1 OS=Mus musculus OX=10090 GN=Mup1 PE=3 SV=1;sp|P11588|MUP1_MOUSE Major urinary protein 1 OS=Mus musculus OX=10090 GN=M	1	591246	598482	406906	505140	298806	97667	55724	486744	519823	201820	97415	103960	345618	171280	125200	579184	464720	276250	1928100	1644300	8451700	1869000	12244000	10132000	20018000	2257500	14319000	26805000	7906500	3434700	4102800	6914700
B0QZX1	B0QZX1;A2AGH5;P34902	Il2rg;Gm20489	Cytokine receptor common subunit gamma	tr|B0QZX1|B0QZX1_MOUSE Cytokine receptor common subunit gamma (Fragment) OS=Mus musculus OX=10090 GN=Il2rg PE=4 SV=1;tr|A2AGH5|A2AGH5_MOUSE Predicted gene 20489 OS=Mus musculus OX=10090 GN=Gm20489 PE=4 SV=1;sp|P34902|IL2RG_MOUSE Cytokine receptor common su	2	591246	5350200	406906	4905000	5620200	7296600	447227	486744	519823	5055100	6076100	5230300	6447800	5870000	6115100	6462200	317536	5787400	223377	4885700	516736	5177500	4725600	228502	328108	243892	4253800	3114600	5490600	5423900	458622	4299900
B1ARB3	B1ARB3;Q08481-4;Q08481-2;Q08481-3;Q08481	Pecam1	Platelet endothelial cell adhesion molecule	tr|B1ARB3|B1ARB3_MOUSE Platelet endothelial cell adhesion molecule OS=Mus musculus OX=10090 GN=Pecam1 PE=1 SV=1;sp|Q08481-4|PECA1_MOUSE Isoform 4 of Platelet endothelial cell adhesion molecule OS=Mus musculus OX=10090 GN=Pecam1;sp|Q08481-2|PECA1_MOUSE Isof	3	5037600	598482	406906	505140	298806	4796600	447227	3221000	5896100	5210100	409407	455300	5588300	5097600	190592	3935600	317536	276250	223377	331010	5610100	218384	283782	228502	328108	243892	377153	4409500	218026	218254	458622	2688100
B1AXW5	B1AXW5;B1AXW6;P35700;B1AXW4;B1AZS9;O08807	Prdx1	Peroxiredoxin-1	tr|B1AXW5|B1AXW5_MOUSE Peroxiredoxin-1 (Fragment) OS=Mus musculus OX=10090 GN=Prdx1 PE=1 SV=8;tr|B1AXW6|B1AXW6_MOUSE Peroxiredoxin-1 (Fragment) OS=Mus musculus OX=10090 GN=Prdx1 PE=1 SV=1;sp|P35700|PRDX1_MOUSE Peroxiredoxin-1 OS=Mus musculus OX=10090 GN=Pr	4	591246	6977700	6209600	8260100	7507300	8046600	447227	6016500	3891800	7514400	8060400	7850700	5040200	8163200	8211500	7103300	317536	8010000	6069800	7301300	5759300	7462000	6017200	7648700	328108	1983000	7264600	3642600	5056900	6449000	6723600	6631900
B2RS76	B2RS76	Cpb1	carboxypeptidase B1 (Tissue)	tr|B2RS76|B2RS76_MOUSE carboxypeptidase B1 (Tissue) OS=Mus musculus OX=10090 GN=Cpb1 PE=1 SV=1	5	591246	598482	406906	505140	20727000	312961	447227	486744	519823	318575	409407	455300	345618	170466	190592	579184	1206700	276250	223377	331010	516736	218384	1210500	228502	328108	243892	377153	264280	1128100	218254	458622	352503
B2RXS4	B2RXS4	Plxnb2	Plexin-B2	sp|B2RXS4|PLXB2_MOUSE Plexin-B2 OS=Mus musculus OX=10090 GN=Plxnb2 PE=1 SV=1	3	5725000	3334200	406906	3195900	298806	312961	3462700	486744	2080700	318575	3571800	3577700	345618	3053200	2616600	3031300	2645200	4125600	223377	2409000	2461400	2966900	2990600	3459600	2376500	1407500	377153	1951000	2562900	3207600	3467600	2536400
B7FAV1	B7FAV1;B7FAU9;Q8BTM8	Flna	Filamin-A	tr|B7FAV1|B7FAV1_MOUSE Filamin, alpha (Fragment) OS=Mus musculus OX=10090 GN=Flna PE=1 SV=1;tr|B7FAU9|B7FAU9_MOUSE Filamin, alpha OS=Mus musculus OX=10090 GN=Flna PE=1 SV=1;sp|Q8BTM8|FLNA_MOUSE Filamin-A OS=Mus musculus OX=10090 GN=Flna PE=1 SV=5	3	1963800	1559000	2265900	505140	3812100	1511700	2116900	3037600	519823	318575	2055100	2244400	345618	2060300	2861500	1649700	2957700	276250	2935400	331010	2643600	1534600	1955200	1862300	2497300	243892	2717400	1578100	2520000	2561900	2325100	2010700
D3YYT0	D3YYT0;P15116	Cdh2	Cadherin-2	tr|D3YYT0|D3YYT0_MOUSE Cadherin-2 OS=Mus musculus OX=10090 GN=Cdh2 PE=1 SV=1;sp|P15116|CADH2_MOUSE Cadherin-2 OS=Mus musculus OX=10090 GN=Cdh2 PE=1 SV=2	1	591246	598482	406906	505140	298806	1740200	447227	486744	519823	318575	3153000	455300	345618	1874200	190592	579184	317536	276250	223377	331010	516736	218384	283782	228502	328108	243892	377153	264280	218026	218254	458622	352503
D3YZ61	D3YZ61;Q9ES30	C1qtnf3	Complement C1q tumor necrosis factor-related protein 3	tr|D3YZ61|D3YZ61_MOUSE Complement C1q tumor necrosis factor-related protein 3 OS=Mus musculus OX=10090 GN=C1qtnf3 PE=1 SV=1;sp|Q9ES30|C1QT3_MOUSE Complement C1q tumor necrosis factor-related protein 3 OS=Mus musculus OX=10090 GN=C1qtnf3 PE=2 SV=1	1	13063000	6349500	6984700	7607100	6852400	13588000	7513600	8682100	5943700	5918200	7876100	7879800	7170800	8012300	7529600	8728600	8038300	276250	223377	331010	8167500	8847100	283782	12046000	8175900	8597700	10960000	264280	5510400	218254	458622	352503
D3Z090	D3Z090;P07141-2;P07141;D3YTW1;F6RNW8	Csf1	Macrophage colony-stimulating factor 1;Processed macrophage colony-stimulating factor 1	tr|D3Z090|D3Z090_MOUSE Macrophage colony-stimulating factor 1 (Fragment) OS=Mus musculus OX=10090 GN=Csf1 PE=1 SV=1;sp|P07141-2|CSF1_MOUSE Isoform 2 of Macrophage colony-stimulating factor 1 OS=Mus musculus OX=10090 GN=Csf1;sp|P07141|CSF1_MOUSE Macrophage	2	5057100	3350200	406906	2340900	298806	3378800	447227	2209200	2895300	2894400	409407	3209800	3782900	5205200	2605700	579184	317536	276250	223377	2180800	2734600	1866700	2342900	228502	328108	243892	2138100	264280	3010200	2302000	2502400	2693400
D3Z0U5	D3Z0U5;D6RGM7;D3Z4J2;Q9D3R6-3;Q9D3R6	Katnal2	Katanin p60 ATPase-containing subunit A-like 2	tr|D3Z0U5|D3Z0U5_MOUSE Katanin p60 ATPase-containing subunit A-like 2 OS=Mus musculus OX=10090 GN=Katnal2 PE=4 SV=1;tr|D6RGM7|D6RGM7_MOUSE Katanin p60 ATPase-containing subunit A-like 2 OS=Mus musculus OX=10090 GN=Katnal2 PE=1 SV=1;tr|D3Z4J2|D3Z4J2_MOUSE K	1	591246	598482	4740300	505140	298806	3439800	447227	486744	4305600	318575	409407	455300	345618	170466	190592	579184	317536	276250	223377	331010	516736	218384	283782	228502	328108	243892	377153	264280	218026	218254	458622	352503
D6RFD9	D6RFD9;Q9JJ59-2;Q9JJ59	Abcb9	ATP-binding cassette sub-family B member 9	tr|D6RFD9|D6RFD9_MOUSE ATP-binding cassette sub-family B member 9 OS=Mus musculus OX=10090 GN=Abcb9 PE=4 SV=1;sp|Q9JJ59-2|ABCB9_MOUSE Isoform 2 of ATP-binding cassette sub-family B member 9 OS=Mus musculus OX=10090 GN=Abcb9;sp|Q9JJ59|ABCB9_MOUSE ATP-bindin	1	446890000	3427800000	5834000	391680000	298806	312961	505620000	1445600000	1515200000	4139500000	409407	455300	39449000	170466	57988000	579184	17318000	603940000	223377	331010	2675500000	218384	61506000	228502	1959300000	1567900000	377153	264280	1373700	218254	135110000	2010400000
E9PUM3	E9PUM3;Q9WUB3	Pygm	Alpha-1,4 glucan phosphorylase;Glycogen phosphorylase, muscle form	tr|E9PUM3|E9PUM3_MOUSE Alpha-1,4 glucan phosphorylase OS=Mus musculus OX=10090 GN=Pygm PE=1 SV=1;sp|Q9WUB3|PYGM_MOUSE Glycogen phosphorylase, muscle form OS=Mus musculus OX=10090 GN=Pygm PE=1 SV=3	2	2601000	598482	406906	505140	298806	312961	447227	486744	1636600	318575	409407	455300	345618	170466	190592	2707800	317536	276250	223377	331010	516736	218384	1718300	2371000	2469300	3116900	377153	2629900	218026	218254	458622	352503
E9PX63	E9PX63;O19441	H2-Q1	Histocompatibility 2, Q region locus 1	tr|E9PX63|E9PX63_MOUSE Histocompatibility 2, Q region locus 1 OS=Mus musculus OX=10090 GN=H2-Q1 PE=3 SV=1;tr|O19441|O19441_MOUSE Histocompatibility 2, Q region locus 1 OS=Mus musculus OX=10090 GN=H2-Q1 PE=2 SV=1	1	591246	598482	406906	505140	5454800	312961	447227	31479000	519823	318575	409407	455300	345618	170466	190592	579184	317536	276250	223377	331010	516736	218384	283782	228502	328108	243892	377153	264280	218026	218254	2611800	352503
E9PX70	E9PX70;Q60847-2;Q60847-5;Q60847	Col12a1	Collagen alpha-1(XII) chain	tr|E9PX70|E9PX70_MOUSE Collagen alpha-1(XII) chain OS=Mus musculus OX=10090 GN=Col12a1 PE=1 SV=1;sp|Q60847-2|COCA1_MOUSE Isoform 2 of Collagen alpha-1(XII) chain OS=Mus musculus OX=10090 GN=Col12a1;sp|Q60847-5|COCA1_MOUSE Isoform 5 of Collagen alpha-1(XII)	2	3890300	1541700	406906	1305200	298806	3442500	2384800	1864100	519823	318575	1841400	455300	1975000	4180500	1545600	3254900	317536	276250	223377	1426600	516736	218384	283782	228502	1519600	243892	1370800	264280	218026	218254	1374900	352503
E9PYA3	E9PYA3;A0A0R4J052;G5E8T9;Q99KB8-2;Q99KB8;D3YWI0;E9Q2H8	Hagh	Hydroxyacylglutathione hydrolase, mitochondrial	tr|E9PYA3|E9PYA3_MOUSE Hydroxyacylglutathione hydrolase, mitochondrial (Fragment) OS=Mus musculus OX=10090 GN=Hagh PE=1 SV=1;tr|A0A0R4J052|A0A0R4J052_MOUSE Hydroxyacylglutathione hydrolase, mitochondrial OS=Mus musculus OX=10090 GN=Hagh PE=1 SV=1;tr|G5E8T9	2	591246	598482	406906	1198200	1244900	312961	2026600	486744	519823	318575	1063700	2431400	1092700	170466	190592	2003100	1998100	963940	1218700	331010	932350	1238800	1122500	1598100	328108	243892	377153	264280	218026	218254	458622	352503
E9PYF1	E9PYF1;Q8VCT3	Rnpep	Aminopeptidase B	tr|E9PYF1|E9PYF1_MOUSE Aminopeptidase B OS=Mus musculus OX=10090 GN=Rnpep PE=1 SV=1;sp|Q8VCT3|AMPB_MOUSE Aminopeptidase B OS=Mus musculus OX=10090 GN=Rnpep PE=1 SV=2	1	2143700	2145500	406906	505140	1716900	2920300	447227	1507300	1447800	937940	409407	455300	345618	2237500	190592	579184	691590	276250	223377	331010	516736	218384	283782	228502	328108	1399100	377153	264280	218026	218254	458622	887830
E9Q2T3	E9Q2T3;O35452;A0A571BG59;A0A5F8MPH8	Tnxb	Tenascin XB	tr|E9Q2T3|E9Q2T3_MOUSE Tenascin XB OS=Mus musculus OX=10090 GN=Tnxb PE=1 SV=1;tr|O35452|O35452_MOUSE Tenascin X OS=Mus musculus OX=10090 GN=Tnxb PE=1 SV=1;tr|A0A571BG59|A0A571BG59_MOUSE Tenascin XB OS=Mus musculus OX=10090 GN=Tnxb PE=1 SV=1;tr|A0A5F8MPH8|A	4	5623300	5728500	4434100	505140	3542600	4248700	3212400	2647200	3234700	2408300	3175900	3325800	3142500	3106200	3195500	4375400	2066500	2177600	2624600	1745500	4308600	2390800	2595300	1802800	1936900	1916000	377153	264280	2023500	2348700	2332700	352503
E9Q509	E9Q509;G3X925;P53657	Pklr	Pyruvate kinase;Pyruvate kinase PKLR	tr|E9Q509|E9Q509_MOUSE Pyruvate kinase OS=Mus musculus OX=10090 GN=Pklr PE=1 SV=1;tr|G3X925|G3X925_MOUSE Pyruvate kinase OS=Mus musculus OX=10090 GN=Pklr PE=1 SV=1;sp|P53657|KPYR_MOUSE Pyruvate kinase PKLR OS=Mus musculus OX=10090 GN=Pklr PE=1 SV=1	1	591246	598482	406906	505140	298806	312961	447227	486744	519823	318575	409407	455300	345618	170466	190592	579184	317536	276250	223377	331010	516736	218384	283782	228502	328108	243892	377153	264280	218026	218254	458622	352503
E9Q704	E9Q704;F8VQA4;P97467	Pam	Peptidyl-glycine alpha-amidating monooxygenase;Peptidylglycine alpha-hydroxylating monooxygenase;Peptidyl-alpha-hydroxyglycine alpha-amidating lyase	tr|E9Q704|E9Q704_MOUSE Peptidyl-glycine alpha-amidating monooxygenase OS=Mus musculus OX=10090 GN=Pam PE=1 SV=1;tr|F8VQA4|F8VQA4_MOUSE Peptidyl-glycine alpha-amidating monooxygenase OS=Mus musculus OX=10090 GN=Pam PE=1 SV=1;sp|P97467|AMD_MOUSE Peptidyl-gly	2	4531900	3544700	3035900	2456000	3091300	3567000	2729900	2815300	2443500	3044100	3031600	2949000	345618	170466	983420	2970200	2862400	4113700	223377	331010	516736	218384	1989900	228502	2059800	1769100	2965300	264280	218026	3171000	2635300	352503
E9Q8C1	E9Q8C1;E9Q1B0;Q9WVC6;Q9WVC6-3;Q9WVC6-2	Sgk1	Serine/threonine-protein kinase Sgk1	tr|E9Q8C1|E9Q8C1_MOUSE Serine/threonine-protein kinase Sgk1 OS=Mus musculus OX=10090 GN=Sgk1 PE=1 SV=1;tr|E9Q1B0|E9Q1B0_MOUSE Serine/threonine-protein kinase Sgk1 OS=Mus musculus OX=10090 GN=Sgk1 PE=1 SV=1;sp|Q9WVC6|SGK1_MOUSE Serine/threonine-protein kina	1	42367000	90063000	128460000	87592000	74308000	36910000	103530000	92052000	519823	58992000	81418000	70731000	80071000	170466	190592	47848000	75469000	90691000	67130000	331010	61378000	73691000	82180000	87905000	328108	25237000	66520000	264280	64848000	45622000	74255000	77468000
E9QN70	E9QN70;P02469	Lamb1	Laminin subunit beta-1	tr|E9QN70|E9QN70_MOUSE Laminin subunit beta-1 OS=Mus musculus OX=10090 GN=Lamb1 PE=1 SV=1;sp|P02469|LAMB1_MOUSE Laminin subunit beta-1 OS=Mus musculus OX=10090 GN=Lamb1 PE=1 SV=3	3	591246	598482	406906	505140	298806	1463500	447227	486744	519823	318575	409407	455300	345618	170466	190592	579184	317536	276250	223377	331010	516736	218384	283782	228502	328108	243892	377153	264280	218026	742720	458622	352503
F6URP1	F6URP1;E9Q328	Gm6619;5430401F13Rik	Predicted gene 6619	tr|F6URP1|F6URP1_MOUSE Predicted gene 6619 OS=Mus musculus OX=10090 GN=Gm6619 PE=4 SV=2;tr|E9Q328|E9Q328_MOUSE RIKEN cDNA 5430401F13 gene OS=Mus musculus OX=10090 GN=5430401F13Rik PE=4 SV=1	1	591246	1143500	406906	1185700	298806	312961	447227	486744	1370900	1267900	1371700	455300	1307300	1222500	190592	1423500	2587900	1372500	725180	331010	516736	1167000	1001000	228502	328108	243892	377153	264280	783750	218254	458622	637780
F8VQA1	F8VQA1	Ttll3	Tubulin monoglycylase TTLL3 (Fragment)	tr|F8VQA1|F8VQA1_MOUSE Tubulin monoglycylase TTLL3 (Fragment) OS=Mus musculus OX=10090 GN=Ttll3 PE=4 SV=1	1	8354500	7175500	11704000	6823100	298806	312961	447227	65836000	17175000	21420000	43123000	62052000	345618	170466	83558000	16445000	28762000	24052000	55294000	29639000	39274000	218384	41257000	28468000	21609000	243892	120900000	74866000	218026	218254	94298000	131720000
F8WH29	F8WH29;E9PUU8;Q80ZA4;Q80ZA4-2	Pkhd1l1	Fibrocystin-L	tr|F8WH29|F8WH29_MOUSE Fibrocystin-L OS=Mus musculus OX=10090 GN=Pkhd1l1 PE=1 SV=1;tr|E9PUU8|E9PUU8_MOUSE Fibrocystin-L OS=Mus musculus OX=10090 GN=Pkhd1l1 PE=1 SV=1;sp|Q80ZA4|PKHL1_MOUSE Fibrocystin-L OS=Mus musculus OX=10090 GN=Pkhd1l1 PE=1 SV=1;sp|Q80ZA	4	2064700	2979300	406906	3381000	298806	3568300	447227	1854600	519823	5343900	4010100	3114500	2101800	2904600	190592	3913700	2526600	2990800	3690100	3377500	1964200	2318900	1839000	2038100	1519600	1994000	377153	264280	2145500	218254	458622	352503
F8WHB1	F8WHB1	Atp2b2	Calcium-transporting ATPase	tr|F8WHB1|F8WHB1_MOUSE Calcium-transporting ATPase OS=Mus musculus OX=10090 GN=Atp2b2 PE=1 SV=1	1	14513000	34337000	24995000	21214000	18884000	312961	23433000	20818000	17676000	16697000	14126000	24538000	20006000	43530000	21436000	12918000	40419000	54797000	36110000	39908000	13810000	31904000	35479000	38076000	14238000	10665000	23477000	18711000	30562000	25332000	29137000	29041000
G3UZJ4	G3UZJ4;H3BJQ7;P99029-2;P99029	Prdx5	Peroxiredoxin-5, mitochondrial	tr|G3UZJ4|G3UZJ4_MOUSE Thioredoxin-dependent peroxiredoxin OS=Mus musculus OX=10090 GN=Prdx5 PE=1 SV=1;tr|H3BJQ7|H3BJQ7_MOUSE Peroxiredoxin-5 OS=Mus musculus OX=10090 GN=Prdx5 PE=1 SV=1;sp|P99029-2|PRDX5_MOUSE Isoform Cytoplasmic+peroxisomal of Peroxiredox	1	591246	598482	406906	505140	298806	312961	447227	486744	519823	318575	772280	1153000	345618	170466	190592	579184	317536	276250	223377	331010	516736	802750	283782	228502	328108	243892	377153	750490	218026	218254	458622	352503
G3UZP7	G3UZP7;P01899	H2-D1	H-2 class I histocompatibility antigen, D-B alpha chain	tr|G3UZP7|G3UZP7_MOUSE H-2 class I histocompatibility antigen, D-K alpha chain OS=Mus musculus OX=10090 GN=H2-D1 PE=1 SV=2;sp|P01899|HA11_MOUSE H-2 class I histocompatibility antigen, D-B alpha chain OS=Mus musculus OX=10090 GN=H2-D1 PE=1 SV=2	2	591246	58645000	75496000	34519000	298806	312961	447227	486744	519823	318575	409407	455300	345618	170466	190592	579184	56271000	84826000	223377	42821000	516736	218384	283782	228502	328108	243892	377153	264280	218026	218254	458622	352503
G3X9W3	G3X9W3	Lrrc1	Leucine-rich repeat-containing protein 1	tr|G3X9W3|G3X9W3_MOUSE Leucine-rich repeat-containing protein 1 OS=Mus musculus OX=10090 GN=Lrrc1 PE=1 SV=1	1	20133000	27734000	28759000	24775000	18431000	20342000	18827000	22777000	17920000	18045000	22530000	455300	18667000	25510000	19633000	19919000	21349000	23052000	223377	19298000	16943000	24301000	18999000	19809000	14829000	13970000	20304000	19881000	23415000	20444000	20239000	14288000
G3XA35	G3XA35;E9PYH0	Vcan	Versican core protein	tr|G3XA35|G3XA35_MOUSE Versican core protein OS=Mus musculus OX=10090 GN=Vcan PE=1 SV=1;tr|E9PYH0|E9PYH0_MOUSE Versican core protein OS=Mus musculus OX=10090 GN=Vcan PE=1 SV=1	1	591246	598482	406906	505140	298806	312961	447227	486744	519823	318575	409407	455300	345618	170466	190592	579184	317536	276250	223377	331010	516736	218384	283782	228502	328108	243892	377153	264280	218026	218254	458622	352503
H3BJP2	H3BJP2;H3BK43;H3BLJ9;H3BJL6;H3BKH6;Q9R0P3	Esd	S-formylglutathione hydrolase	tr|H3BJP2|H3BJP2_MOUSE S-formylglutathione hydrolase (Fragment) OS=Mus musculus OX=10090 GN=Esd PE=1 SV=1;tr|H3BK43|H3BK43_MOUSE Esterase D OS=Mus musculus OX=10090 GN=Esd PE=1 SV=1;tr|H3BLJ9|H3BLJ9_MOUSE S-formylglutathione hydrolase OS=Mus musculus OX=10	1	1171000	598482	2308300	505140	1215800	312961	2145400	486744	519823	318575	1737400	3296100	345618	170466	190592	2193300	1947600	843400	223377	331010	516736	2758100	991760	2159700	328108	243892	377153	1681600	218026	218254	458622	352503
H7BWZ3	H7BWZ3;Q9JM76;A0A0G2JFK7;D3Z2F7;D3Z2F8	Arpc3	Actin-related protein 2/3 complex subunit 3	tr|H7BWZ3|H7BWZ3_MOUSE Actin-related protein 2/3 complex subunit 3 OS=Mus musculus OX=10090 GN=Arpc3 PE=1 SV=1;sp|Q9JM76|ARPC3_MOUSE Actin-related protein 2/3 complex subunit 3 OS=Mus musculus OX=10090 GN=Arpc3 PE=1 SV=3;tr|A0A0G2JFK7|A0A0G2JFK7_MOUSE Acti	2	591246	1339400	2448200	505140	1760800	3423400	1545400	1336800	519823	318575	1540800	1116300	1575800	1711400	1742100	1653300	317536	1657300	1240800	1166000	516736	1217200	283782	1320100	328108	243892	377153	264280	218026	1170400	458622	1047700
H7BXC3	H7BXC3;P17751;P17751-2	Tpi1	Triosephosphate isomerase	tr|H7BXC3|H7BXC3_MOUSE Triosephosphate isomerase OS=Mus musculus OX=10090 GN=Tpi1 PE=1 SV=1;sp|P17751|TPIS_MOUSE Triosephosphate isomerase OS=Mus musculus OX=10090 GN=Tpi1 PE=1 SV=5;sp|P17751-2|TPIS_MOUSE Isoform 2 of Triosephosphate isomerase OS=Mus muscu	3	12780000	5602600	8547100	6593500	7075700	12992000	11056000	4548600	3705600	318575	14930000	26713000	7645500	9291600	5373500	9553100	9126400	6159800	9979600	3141600	2771300	13747000	4175300	11286000	328108	1635200	8583800	12986000	4958400	13161000	4165200	2444400
J3KMU5	J3KMU5;Q8K0R6	Gltpd2	Glycolipid transfer protein domain-containing protein 2	tr|J3KMU5|J3KMU5_MOUSE Glycolipid transfer protein domain-containing protein 2 OS=Mus musculus OX=10090 GN=Gltpd2 PE=1 SV=1;sp|Q8K0R6|GLTD2_MOUSE Glycolipid transfer protein domain-containing protein 2 OS=Mus musculus OX=10090 GN=Gltpd2 PE=1 SV=1	1	571710	880810	1333700	1531600	758870	439070	974450	714590	815310	568370	591580	719380	1096800	1225800	610940	602450	1039600	1068700	824460	611080	607760	668500	283782	1118000	539660	249410	707260	832310	628070	218254	458622	586450
J3QPS8	J3QPS8;A0A0A0MQM0;P63242	Eif5a	Eukaryotic translation initiation factor 5A;Eukaryotic translation initiation factor 5A-1	tr|J3QPS8|J3QPS8_MOUSE Eukaryotic translation initiation factor 5A-1 OS=Mus musculus OX=10090 GN=Eif5a PE=1 SV=1;tr|A0A0A0MQM0|A0A0A0MQM0_MOUSE Eukaryotic translation initiation factor 5A (Fragment) OS=Mus musculus OX=10090 GN=Eif5a PE=1 SV=1;sp|P63242|IF5	1	591246	598482	406906	505140	298806	312961	1343800	486744	519823	318575	1465500	455300	345618	170466	190592	579184	317536	276250	223377	331010	516736	883190	283782	228502	328108	243892	377153	264280	218026	218254	458622	352503
M0QWA7	M0QWA7;Q542I8;P11835;D3YYP8	Itgb2	Integrin beta;Integrin beta-2	tr|M0QWA7|M0QWA7_MOUSE Integrin beta OS=Mus musculus OX=10090 GN=Itgb2 PE=1 SV=1;tr|Q542I8|Q542I8_MOUSE Integrin beta OS=Mus musculus OX=10090 GN=Itgb2 PE=1 SV=1;sp|P11835|ITB2_MOUSE Integrin beta-2 OS=Mus musculus OX=10090 GN=Itgb2 PE=1 SV=2;tr|D3YYP8|D3Y	2	4722500	2547500	3616500	3065200	2206200	2384000	2828600	2543200	1793200	318575	2864200	455300	2121000	1738400	2312600	4710600	317536	1521500	223377	1579400	2432000	2322300	1841000	228502	328108	1200700	377153	264280	218026	218254	458622	352503
M0QWU8	M0QWU8;Q4VWZ5;P31786	Dbi	Acyl-CoA-binding protein	tr|M0QWU8|M0QWU8_MOUSE Acyl-CoA-binding protein OS=Mus musculus OX=10090 GN=Dbi PE=1 SV=1;tr|Q4VWZ5|Q4VWZ5_MOUSE Acyl-CoA-binding protein OS=Mus musculus OX=10090 GN=Dbi PE=1 SV=1;sp|P31786|ACBP_MOUSE Acyl-CoA-binding protein OS=Mus musculus OX=10090 GN=Db	1	18239000	598482	5575100	3547400	298806	312961	447227	2189700	519823	318575	4763400	20455000	345618	170466	190592	4465300	14933000	276250	223377	331010	516736	218384	283782	228502	328108	243892	377153	264280	7355500	218254	458622	352503
O09049	O09049	Reg3g	Regenerating islet-derived protein 3-gamma;Regenerating islet-derived protein 3-gamma 16.5 kDa form;Regenerating islet-derived protein 3-gamma 15 kDa form	sp|O09049|REG3G_MOUSE Regenerating islet-derived protein 3-gamma OS=Mus musculus OX=10090 GN=Reg3g PE=1 SV=1	2	591246	598482	406906	505140	298806	312961	447227	486744	519823	318575	6597800	455300	3991000	170466	190592	579184	317536	276250	223377	331010	3090100	218384	283782	228502	3296900	243892	5658800	3480200	4565800	3290800	458622	3100100
O09114-2	O09114-2;O09114	Ptgds	Prostaglandin-H2 D-isomerase	sp|O09114-2|PTGDS_MOUSE Isoform 2 of Prostaglandin-H2 D-isomerase OS=Mus musculus OX=10090 GN=Ptgds;sp|O09114|PTGDS_MOUSE Prostaglandin-H2 D-isomerase OS=Mus musculus OX=10090 GN=Ptgds PE=1 SV=1	1	810900	956020	1006400	505140	298806	629190	690020	458280	1011700	604090	1022100	647620	1435800	1514000	1036400	579184	1037600	831430	606960	331010	1053600	990490	283782	228502	328108	600670	915070	264280	1253800	1536900	734620	588260
O09173	O09173;Q05BJ1	Hgd	Homogentisate 1,2-dioxygenase	sp|O09173|HGD_MOUSE Homogentisate 1,2-dioxygenase OS=Mus musculus OX=10090 GN=Hgd PE=1 SV=2;tr|Q05BJ1|Q05BJ1_MOUSE Homogentisate 1,2-dioxygenase OS=Mus musculus OX=10090 GN=Hgd PE=1 SV=1	5	12195000	2511300	6544200	1851700	298806	1692800	1549900	1463100	1638600	2701700	1815400	8285700	345618	1581700	190592	1813600	1837900	2458700	1758000	1664200	516736	1213800	283782	228502	328108	1327000	803980	1795700	1510400	966930	458622	1338000
O35215	O35215;G3UZN1;G3UYJ7	Ddt;Gm20441	D-dopachrome decarboxylase	sp|O35215|DOPD_MOUSE D-dopachrome decarboxylase OS=Mus musculus OX=10090 GN=Ddt PE=1 SV=3;tr|G3UZN1|G3UZN1_MOUSE D-dopachrome decarboxylase OS=Mus musculus OX=10090 GN=Ddt PE=1 SV=1;tr|G3UYJ7|G3UYJ7_MOUSE Predicted gene 20441 (Fragment) OS=Mus musculus OX=	4	856760	598482	406906	505140	298806	312961	447227	486744	519823	318575	409407	10160000	345618	170466	190592	579184	317536	276250	223377	331010	516736	218384	283782	228502	328108	243892	377153	917380	218026	218254	458622	352503
O35490	O35490;Q91WS4	Bhmt	Betaine--homocysteine S-methyltransferase 1	sp|O35490|BHMT1_MOUSE Betaine--homocysteine S-methyltransferase 1 OS=Mus musculus OX=10090 GN=Bhmt PE=1 SV=1	6	4657100	9609800	8976200	3331100	2538700	312961	1617300	1392600	2121900	6941400	409407	51009000	345618	2852900	190592	3428700	317536	4073300	2339000	331010	516736	218384	283782	765380	328108	243892	1011400	3299700	3056500	218254	458622	1021100
O54782	O54782;F6TMZ3;F6Z025	Man2b2	Epididymis-specific alpha-mannosidase	sp|O54782|MA2B2_MOUSE Epididymis-specific alpha-mannosidase OS=Mus musculus OX=10090 GN=Man2b2 PE=1 SV=2	9	19441000	596290	3911200	4555800	298806	5999400	2129100	4747600	1899000	9554800	409407	2379000	345618	2990400	2232600	6013300	317536	276250	223377	331010	516736	218384	283782	228502	328108	243892	377153	264280	1618600	218254	458622	352503
O55042-2	O55042-2;O55042	Snca	Alpha-synuclein	sp|O55042-2|SYUA_MOUSE Isoform 2 of Alpha-synuclein OS=Mus musculus OX=10090 GN=Snca;sp|O55042|SYUA_MOUSE Alpha-synuclein OS=Mus musculus OX=10090 GN=Snca PE=1 SV=2	1	591246	598482	406906	505140	298806	312050	951990	486744	519823	318575	409407	442680	358130	170466	190592	285410	379120	431170	227070	331010	516736	218384	283782	1204200	328108	243892	377153	184260	218026	305000	458622	352503
O55134	O55134	Pcdh12	Protocadherin-12	sp|O55134|PCD12_MOUSE Protocadherin-12 OS=Mus musculus OX=10090 GN=Pcdh12 PE=1 SV=2	3	2851100	2406200	3415800	2502700	2121300	2243800	3397200	2427000	1932100	318575	1653800	455300	2210800	3566300	190592	2371700	2174300	3131700	223377	2344500	2192100	2062900	283782	1757600	1556900	1299900	377153	264280	2112200	218254	458622	352503
O70570	O70570	Pigr	Polymeric immunoglobulin receptor;Secretory component	sp|O70570|PIGR_MOUSE Polymeric immunoglobulin receptor OS=Mus musculus OX=10090 GN=Pigr PE=1 SV=1	1	591246	598482	193070	505140	440120	312961	447227	486744	519823	318575	409407	455300	345618	170466	190592	579184	317536	276250	223377	331010	516736	218384	283782	228502	328108	243892	377153	264280	218026	218254	458622	352503
O88325	O88325	Naglu	Alpha-N-acetylglucosaminidase	tr|O88325|O88325_MOUSE Alpha-N-acetylglucosaminidase OS=Mus musculus OX=10090 GN=Naglu PE=1 SV=1	4	591246	1951300	4127500	505140	298806	312961	447227	486744	519823	318575	2260500	455300	345618	170466	190592	579184	317536	276250	223377	331010	516736	218384	283782	228502	328108	2605400	377153	264280	218026	218254	458622	352503
O88452	O88452	Stc2	Stanniocalcin-2	sp|O88452|STC2_MOUSE Stanniocalcin-2 OS=Mus musculus OX=10090 GN=Stc2 PE=1 SV=1	1	591246	598482	406906	505140	762950	312961	1136400	486744	519823	318575	409407	455300	345618	1378300	953740	579184	317536	276250	223377	331010	516736	559420	283782	228502	328108	243892	377153	264280	218026	218254	458622	352503
O88668	O88668;K4DI63;J3QP41	Creg1	Protein CREG1	sp|O88668|CREG1_MOUSE Protein CREG1 OS=Mus musculus OX=10090 GN=Creg1 PE=1 SV=1;tr|K4DI63|K4DI63_MOUSE Protein CREG1 OS=Mus musculus OX=10090 GN=Creg1 PE=1 SV=1;tr|J3QP41|J3QP41_MOUSE Protein CREG1 OS=Mus musculus OX=10090 GN=Creg1 PE=1 SV=1	2	6727700	4184100	4148700	4094600	298806	3913200	3446000	2989000	519823	6089900	5318200	2905900	345618	2788300	2298200	4404400	317536	2412700	3702800	4244100	516736	4458200	2749800	2951100	328108	1579100	3281900	2345400	3706700	4015600	3339500	2598100
O89017	O89017	Lgmn	Legumain	sp|O89017|LGMN_MOUSE Legumain OS=Mus musculus OX=10090 GN=Lgmn PE=1 SV=1	2	3645900	2491500	3127200	3161800	3342900	312961	447227	2276800	519823	318575	3226400	455300	345618	170466	3108300	3722700	317536	276250	223377	331010	516736	218384	1806400	228502	328108	243892	377153	264280	218026	218254	458622	352503
O89053	O89053	Coro1a	Coronin-1A	sp|O89053|COR1A_MOUSE Coronin-1A OS=Mus musculus OX=10090 GN=Coro1a PE=1 SV=5	1	1617800	1098000	1403400	862910	1232000	312961	1346300	974340	1363200	799200	1966200	1146300	1302200	1045400	921030	1435800	1007700	876850	1223900	883390	1093800	1242000	1117800	872540	570000	765850	786600	609200	1067300	1383200	615350	926630
P00329	P00329	Adh1	Alcohol dehydrogenase 1	sp|P00329|ADH1_MOUSE Alcohol dehydrogenase 1 OS=Mus musculus OX=10090 GN=Adh1 PE=1 SV=2	7	24845000	4468400	9164000	1643700	4703300	3777800	2064000	1790300	1761600	6243400	1495400	56440000	1620400	3607700	190592	4705600	1596100	1912700	223377	331010	516736	1335100	283782	228502	328108	1582100	1063300	6375700	1107900	1326000	458622	352503
P01654	P01654;P01656;P01655;A0A075B5P0;P03977;A0A075B5N9;P01668;P01673;P01669;P01667;P01666;P01665;P01664;P01657;P01659	Igkv3-2	Ig kappa chain V-III region PC 2880/PC 1229;Ig kappa chain V-III region MOPC 70;Ig kappa chain V-III region PC 7132;Ig kappa chain V-III region 50S10.1	sp|P01654|KV3A1_MOUSE Ig kappa chain V-III region PC 2880/PC 1229 OS=Mus musculus OX=10090 PE=1 SV=1;sp|P01656|KV3A3_MOUSE Ig kappa chain V-III region MOPC 70 OS=Mus musculus OX=10090 PE=1 SV=1;sp|P01655|KV3A2_MOUSE Ig kappa chain V-III region PC 7132 OS=M	4	151830000	16665000	102960000	41334000	298806	11346000	447227	486744	519823	19634000	46635000	10871000	345618	170466	190592	10580000	50599000	22259000	15728000	21831000	516736	218384	283782	228502	44791000	25782000	25619000	26695000	218026	218254	4882100	352503
P01837	P01837;A0A5H1ZRK8		Ig kappa chain C region	sp|P01837|IGKC_MOUSE Immunoglobulin kappa constant OS=Mus musculus OX=10090 GN=Igkc PE=1 SV=2;tr|A0A5H1ZRK8|A0A5H1ZRK8_MOUSE Immunoglobulin kappa constant (Fragment) OS=Mus musculus OX=10090 GN=Igkc PE=1 SV=1	5	62922000	4228500	6765200	20534000	5004800	7007800	447227	486744	5028700	5995600	6996700	1264000	345618	1339700	1480300	2545500	6839800	13481000	4296800	797360	516736	1216000	1278800	228502	3917600	3198600	3658100	4839400	789880	218254	458622	352503
P04117	P04117	Fabp4	Fatty acid-binding protein, adipocyte	sp|P04117|FABP4_MOUSE Fatty acid-binding protein, adipocyte OS=Mus musculus OX=10090 GN=Fabp4 PE=1 SV=3	7	27708000	20576000	12173000	8017800	298806	1025200	447227	486744	519823	318575	9100400	6587300	950920	2672500	190592	2670400	31608000	2148500	596970	1905400	6832300	3012500	283782	4138300	328108	243892	377153	444680	61558000	43171000	458622	352503
P05213	P05213;P68373;A0A2R8VHF3	Tuba1b;Tuba1c	Tubulin alpha-1B chain;Tubulin alpha-1C chain	sp|P05213|TBA1B_MOUSE Tubulin alpha-1B chain OS=Mus musculus OX=10090 GN=Tuba1b PE=1 SV=2;sp|P68373|TBA1C_MOUSE Tubulin alpha-1C chain OS=Mus musculus OX=10090 GN=Tuba1c PE=1 SV=1;tr|A0A2R8VHF3|A0A2R8VHF3_MOUSE Tubulin alpha chain (Fragment) OS=Mus musculu	5	5062700	4562100	6765400	4553600	3931500	8558500	6382700	5157200	2935100	318575	5969200	4416600	345618	3221400	2401200	3885900	3908600	3610200	3719100	3872900	2797700	4658900	5401200	3595500	4205400	3304900	377153	4422300	218026	3543000	458622	352503
P05555	P05555;A0A0R4J1B4;E9Q604;G5E8F1;E9Q5K8;Q3U1U4;P05555-2	Itgam	Integrin alpha-M	sp|P05555|ITAM_MOUSE Integrin alpha-M OS=Mus musculus OX=10090 GN=Itgam PE=1 SV=2;tr|A0A0R4J1B4|A0A0R4J1B4_MOUSE Integrin alpha-M OS=Mus musculus OX=10090 GN=Itgam PE=1 SV=1;tr|E9Q604|E9Q604_MOUSE Integrin alpha-M OS=Mus musculus OX=10090 GN=Itgam PE=1 SV=	2	4325100	4556400	406906	3292200	298806	3364100	3134400	2186400	519823	2367500	2221300	455300	3695800	2287400	190592	3273900	3308900	4275800	2045600	2907600	516736	218384	2209900	228502	328108	2480000	1684900	3202600	218026	1889000	2830400	1538400
P06797	P06797;A0A1Y7VNQ4;A0A1Y7VNM3	Ctsl	Cathepsin L1;Cathepsin L1 heavy chain;Cathepsin L1 light chain	sp|P06797|CATL1_MOUSE Procathepsin L OS=Mus musculus OX=10090 GN=Ctsl PE=1 SV=2;tr|A0A1Y7VNQ4|A0A1Y7VNQ4_MOUSE Cathepsin L1 (Fragment) OS=Mus musculus OX=10090 GN=Ctsl PE=1 SV=1;tr|A0A1Y7VNM3|A0A1Y7VNM3_MOUSE Cathepsin L1 (Fragment) OS=Mus musculus OX=1009	2	591246	4905200	406906	4513900	4087000	312961	5378000	486744	519823	318575	409407	455300	4862300	170466	2244900	3848900	317536	5603200	5336200	3155600	516736	4608400	283782	3185300	3854800	3119300	377153	264280	4253200	3826800	458622	352503
P07146	P07146	Prss2	Anionic trypsin-2	sp|P07146|TRY2_MOUSE Anionic trypsin-2 OS=Mus musculus OX=10090 GN=Prss2 PE=1 SV=1	1	591246	598482	406906	505140	32406000	4331200	447227	486744	519823	318575	409407	455300	345618	170466	190592	579184	317536	276250	223377	331010	516736	218384	283782	228502	328108	1901700	377153	264280	218026	218254	458622	352503
P07310	P07310;A0A0J9YKD4	Ckm	Creatine kinase M-type	sp|P07310|KCRM_MOUSE Creatine kinase M-type OS=Mus musculus OX=10090 GN=Ckm PE=1 SV=1;tr|A0A0J9YKD4|A0A0J9YKD4_MOUSE Creatine kinase OS=Mus musculus OX=10090 GN=Ckm PE=1 SV=1	6	7929700	598482	4058800	2155000	298806	5188600	447227	486744	2483100	318575	13211000	8728600	345618	5867800	5894500	2275100	5454600	276250	4391100	331010	516736	8166100	1649900	4943800	328108	1384400	5541300	3852700	4090800	8808100	4311600	352503
P09036	P09036	Spink3	Serine protease inhibitor Kazal-type 3	sp|P09036|ISK1_MOUSE Serine protease inhibitor Kazal-type 1 OS=Mus musculus OX=10090 GN=Spink1 PE=1 SV=1	2	3306900	598482	406906	505140	298806	2885600	3853500	3050100	2725000	318575	2965200	455300	4314000	170466	190592	579184	317536	276250	223377	331010	516736	3328500	2414900	228502	328108	243892	377153	2902200	218026	218254	458622	352503
P09055	P09055;P09055-2	Itgb1	Integrin beta-1	sp|P09055|ITB1_MOUSE Integrin beta-1 OS=Mus musculus OX=10090 GN=Itgb1 PE=1 SV=1;sp|P09055-2|ITB1_MOUSE Isoform 2 of Integrin beta-1 OS=Mus musculus OX=10090 GN=Itgb1	2	4275200	598482	3428300	1519900	298806	5090000	447227	486744	519823	318575	409407	455300	2418700	170466	190592	3952900	317536	276250	223377	331010	2079900	218384	283782	228502	328108	243892	377153	264280	218026	218254	458622	352503
P10126	P10126;P62631;D3Z3I8;D3YZ68	Eef1a1;Eef1a2	Elongation factor 1-alpha 1;Elongation factor 1-alpha 2	sp|P10126|EF1A1_MOUSE Elongation factor 1-alpha 1 OS=Mus musculus OX=10090 GN=Eef1a1 PE=1 SV=3;sp|P62631|EF1A2_MOUSE Elongation factor 1-alpha 2 OS=Mus musculus OX=10090 GN=Eef1a2 PE=1 SV=1	3	4400600	598482	3664200	3773300	3766500	4869400	27993000	3172400	519823	318575	4886900	7277800	3843400	170466	3009100	5373000	12646000	5847200	3084400	3361600	516736	6099000	3395900	15760000	328108	2991900	2736800	4188800	3696700	3765900	458622	2171100
P10493	P10493	Nid1	Nidogen-1	sp|P10493|NID1_MOUSE Nidogen-1 OS=Mus musculus OX=10090 GN=Nid1 PE=1 SV=2	2	2320000	1318900	406906	505140	298806	1375400	447227	486744	519823	318575	409407	455300	345618	170466	1111400	579184	317536	276250	223377	331010	516736	218384	283782	228502	328108	243892	377153	1190400	218026	218254	1075300	352503
P10639	P10639	Txn	Thioredoxin	sp|P10639|THIO_MOUSE Thioredoxin OS=Mus musculus OX=10090 GN=Txn PE=1 SV=3	1	14968000	9505600	10653000	10665000	6070500	9199500	12688000	4576800	519823	318575	15730000	21394000	7605500	8682200	190592	7874600	14154000	7964900	6961400	4724400	5716100	16785000	283782	12057000	328108	243892	377153	8734000	7973600	12488000	458622	352503
P10649	P10649;A2AE89;F6WHQ7;D3YVP6;Q80W21;D3YVP5;E9QAC8;P19639;D3YX76;P15626;D3YVP9;A2AE91;O35660;D3YVP8;Q8R5I6;G5E8M7;D3YZ29	Gstm1	Glutathione S-transferase Mu 1	sp|P10649|GSTM1_MOUSE Glutathione S-transferase Mu 1 OS=Mus musculus OX=10090 GN=Gstm1 PE=1 SV=2;tr|A2AE89|A2AE89_MOUSE Glutathione transferase OS=Mus musculus OX=10090 GN=Gstm1 PE=1 SV=2;tr|F6WHQ7|F6WHQ7_MOUSE Glutathione S-transferase Mu 1 (Fragment) OS=	7	8985100	4555500	6530500	2793600	7592500	7019100	447227	2030700	3490900	2195100	7378000	50319000	4674200	170466	3100700	7965100	3807800	3076200	3480500	4316100	516736	4118800	1483600	2015100	819710	1796200	2843400	18238000	4609400	5594700	2363700	352503
P11152	P11152	Lpl	Lipoprotein lipase	sp|P11152|LIPL_MOUSE Lipoprotein lipase OS=Mus musculus OX=10090 GN=Lpl PE=1 SV=3	2	4540900	4972200	5462900	505140	298806	5078700	447227	486744	7932900	3896500	409407	455300	345618	170466	190592	6506500	317536	276250	2919800	2495300	516736	218384	283782	228502	328108	3828100	377153	264280	218026	2897100	458622	352503
P11404	P11404	Fabp3	Fatty acid-binding protein, heart	sp|P11404|FABPH_MOUSE Fatty acid-binding protein, heart OS=Mus musculus OX=10090 GN=Fabp3 PE=1 SV=5	6	22957000	5222800	17609000	5548900	8519800	17778000	3212400	4910400	11242000	318575	16018000	24432000	15775000	18626000	12609000	18444000	24303000	5032000	16393000	4809700	5761800	27898000	3882100	13790000	328108	2705400	14738000	12319000	15319000	24927000	7879200	2173200
P11438	P11438	Lamp1	Lysosome-associated membrane glycoprotein 1	sp|P11438|LAMP1_MOUSE Lysosome-associated membrane glycoprotein 1 OS=Mus musculus OX=10090 GN=Lamp1 PE=1 SV=2	5	6737400	598482	4331700	4812500	6152000	7770100	1812300	2723600	2569900	7592500	3783700	6541000	2885800	17212000	2967200	5818600	7976500	4203200	3652100	331010	4855300	3553400	283782	2349000	2521400	243892	6880400	2612200	218026	4268400	4870900	4451200
P11589	P11589	Mup2	Major urinary protein 2	sp|P11589|MUP2_MOUSE Major urinary protein 2 OS=Mus musculus OX=10090 GN=Mup2 PE=1 SV=1	1	591246	6125800	9576400	9692900	22142000	312961	10740000	8070000	14610000	9623600	9896500	10018000	20747000	10377000	19494000	5372600	71283000	54812000	54246000	52925000	83438000	57447000	66572000	59248000	69814000	9064200	67647000	35661000	87593000	71107000	51240000	52811000
P12399	P12399	Ctla2a	Protein CTLA-2-alpha	sp|P12399|CTL2A_MOUSE Protein CTLA-2-alpha OS=Mus musculus OX=10090 GN=Ctla2a PE=2 SV=2	1	591246	598482	406906	505140	298806	312961	447227	486744	519823	318575	22451000	8390400	345618	170466	190592	11553000	317536	276250	16825000	331010	516736	19025000	283782	228502	328108	243892	377153	264280	218026	218254	458622	352503
P12710	P12710	Fabp1	Fatty acid-binding protein, liver	sp|P12710|FABPL_MOUSE Fatty acid-binding protein, liver OS=Mus musculus OX=10090 GN=Fabp1 PE=1 SV=2	7	452730	1483900	173720	1439700	5681000	236450	42011	330180	311380	318575	1306100	178160000	62727	45222	35875	3486800	317536	35142	223377	331010	516736	36843	48839	228502	328108	243892	33511	40432000	44233	47846	458622	352503
P12804	P12804	Fgl2	Fibroleukin	sp|P12804|FGL2_MOUSE Fibroleukin OS=Mus musculus OX=10090 GN=Fgl2 PE=1 SV=1	1	2236700	3049600	1919400	2128900	4106200	2632800	447227	1582400	1866300	2115800	2081100	455300	2862500	3431100	3541400	1976500	1786000	2515500	1833700	2070200	1926700	1476500	2192000	1615200	1912700	2098500	1508000	264280	1841700	1895400	458622	352503
P13609	P13609	Srgn	Serglycin	sp|P13609|SRGN_MOUSE Serglycin OS=Mus musculus OX=10090 GN=Srgn PE=1 SV=1	2	591246	598482	6152700	505140	298806	5809200	447227	486744	519823	318575	23202000	15841000	4297100	5945600	4814100	7207800	3883500	276250	10362000	6615600	516736	15028000	283782	3475800	328108	243892	8364800	3946700	9074900	9170900	458622	352503
P14211	P14211	Calr	Calreticulin	sp|P14211|CALR_MOUSE Calreticulin OS=Mus musculus OX=10090 GN=Calr PE=1 SV=1	2	1108400	1242200	1055000	1274100	1649300	1693900	1269400	486744	1244400	900930	1346500	1278900	1007100	170466	190592	1252100	1396700	869060	825860	1425300	770680	720160	283782	812200	328108	593160	377153	554240	718050	218254	458622	352503
P14426	P14426;A0A494BA33;A0A494BAT0;Q3TH01;P01901;G3UXW2	H2-D1;H2-K1	H-2 class I histocompatibility antigen, D-K alpha chain;H-2 class I histocompatibility antigen, K-B alpha chain	sp|P14426|HA13_MOUSE H-2 class I histocompatibility antigen, D-K alpha chain OS=Mus musculus OX=10090 GN=H2-D1 PE=1 SV=1;tr|A0A494BA33|A0A494BA33_MOUSE H-2 class I histocompatibility antigen, K-K alpha chain (Fragment) OS=Mus musculus OX=10090 GN=H2-K1 PE=	1	3079000	2657700	2306700	2415500	298806	3104700	447227	486744	519823	318575	2711100	455300	345618	170466	2571700	2404900	317536	276250	223377	331010	516736	218384	283782	2349200	328108	243892	377153	264280	218026	218254	458622	352503
P15105	P15105	Glul	Glutamine synthetase	sp|P15105|GLNA_MOUSE Glutamine synthetase OS=Mus musculus OX=10090 GN=Glul PE=1 SV=6	1	591246	598482	406906	505140	298806	312961	447227	486744	519823	318575	409407	455300	345618	170466	190592	579184	317536	276250	223377	331010	516736	218384	283782	228502	328108	243892	377153	264280	218026	218254	458622	352503
P16015	P16015	Ca3	Carbonic anhydrase 3	sp|P16015|CAH3_MOUSE Carbonic anhydrase 3 OS=Mus musculus OX=10090 GN=Ca3 PE=1 SV=3	9	4824400	3778800	1186600	4006400	1896600	3500200	447227	858840	384270	318575	9955500	53243000	572710	738680	190592	7848400	3586400	276250	1724700	260050	516736	660240	283782	2904100	478400	243892	377153	16460000	2782100	2988100	458622	352503
P16460	P16460	Ass1	Argininosuccinate synthase	sp|P16460|ASSY_MOUSE Argininosuccinate synthase OS=Mus musculus OX=10090 GN=Ass1 PE=1 SV=1	3	4071300	598482	406906	505140	298806	312961	447227	486744	519823	318575	409407	19513000	345618	170466	190592	579184	317536	276250	223377	331010	516736	218384	283782	228502	328108	243892	377153	2441600	218026	218254	458622	352503
P18528	P18528	HVM57	Ig heavy chain V region 6.96	sp|P18528|HVM57_MOUSE Ig heavy chain V region 6.96 OS=Mus musculus OX=10090 PE=4 SV=1	2	7035600	598482	2847800	505140	70804000	312961	447227	486744	519823	318575	409407	455300	345618	170466	190592	579184	317536	2805000	223377	331010	516736	9894600	283782	228502	2382900	243892	377153	2261500	218026	218254	2551400	352503
P21550	P21550;Q5SX59;Q5SX61;Q5SX60;J3QPZ9	Eno3	Beta-enolase;Enolase	sp|P21550|ENOB_MOUSE Beta-enolase OS=Mus musculus OX=10090 GN=Eno3 PE=1 SV=3;tr|Q5SX59|Q5SX59_MOUSE 2-phospho-D-glycerate hydro-lyase (Fragment) OS=Mus musculus OX=10090 GN=Eno3 PE=1 SV=1	5	2395000	598482	406906	505140	1567000	3056400	447227	486744	1903100	318575	3163100	1955200	2020100	3541700	2299400	2447700	2351700	1558300	1909100	331010	516736	2918100	283782	2167500	328108	1393100	2470500	1588700	2531600	2519200	1596800	352503
P23492	P23492;Q543K9;Q9D8C9	Pnp	Purine nucleoside phosphorylase	sp|P23492|PNPH_MOUSE Purine nucleoside phosphorylase OS=Mus musculus OX=10090 GN=Pnp PE=1 SV=2;tr|Q543K9|Q543K9_MOUSE Purine nucleoside phosphorylase OS=Mus musculus OX=10090 GN=Pnp PE=1 SV=1	5	4316400	598482	3811000	3707800	2625400	5401000	14597000	2211700	2479600	318575	13658000	10794000	3649300	170466	190592	4906100	4544400	7534700	2516300	331010	2690600	9982500	2369300	11648000	328108	243892	377153	2080400	2001500	2022900	458622	1913100
P24549	P24549;O35945;A0A286YCZ0;G3UWP3;A0A0G2JEU1;Q9JHW9;Q62148;Q9CZS1;P47738	Aldh1a1;Aldh1a7	Retinal dehydrogenase 1;Aldehyde dehydrogenase, cytosolic 1	sp|P24549|AL1A1_MOUSE Retinal dehydrogenase 1 OS=Mus musculus OX=10090 GN=Aldh1a1 PE=1 SV=5;sp|O35945|AL1A7_MOUSE Aldehyde dehydrogenase, cytosolic 1 OS=Mus musculus OX=10090 GN=Aldh1a7 PE=1 SV=1;tr|A0A286YCZ0|A0A286YCZ0_MOUSE Retinal dehydrogenase 1 (Frag	10	5052600	1429300	4262000	965450	1104200	2313700	5638000	486744	519823	318575	6946900	28176000	3407400	720890	190592	5292700	5564800	5720600	1610100	331010	3329100	4521500	283782	4908900	328108	243892	377153	4760800	1980500	1431500	458622	352503
P25785	P25785;Q6PI17;B1AQJ3	Timp2	Metalloproteinase inhibitor 2	sp|P25785|TIMP2_MOUSE Metalloproteinase inhibitor 2 OS=Mus musculus OX=10090 GN=Timp2 PE=1 SV=2;tr|Q6PI17|Q6PI17_MOUSE Metalloproteinase inhibitor 2 OS=Mus musculus OX=10090 GN=Timp2 PE=1 SV=1;tr|B1AQJ3|B1AQJ3_MOUSE Metalloproteinase inhibitor 2 (Fragment)	2	8612500	7132200	406906	505140	298806	8794700	447227	6694200	8143500	318575	10913000	455300	345618	170466	9120500	6683300	6212400	276250	223377	331010	7341500	218384	283782	228502	6695400	6044600	7909600	264280	218026	218254	458622	352503
P25916	P25916	Bmi1	Polycomb complex protein BMI-1	sp|P25916|BMI1_MOUSE Polycomb complex protein BMI-1 OS=Mus musculus OX=10090 GN=Bmi1 PE=1 SV=1	1	880990000	531770000	679800000	658780000	548600000	713980000	699830000	526700000	763480000	574970000	640280000	635630000	645180000	689470000	575960000	625060000	843440000	738220000	657310000	694460000	846940000	889760000	786950000	740160000	897280000	618590000	727940000	791310000	830430000	798210000	733190000	774100000
P26041	P26041	Msn	Moesin	sp|P26041|MOES_MOUSE Moesin OS=Mus musculus OX=10090 GN=Msn PE=1 SV=3	3	2307100	1333300	1679200	1579100	298806	1660200	447227	486744	519823	318575	2118400	1133900	345618	170466	190592	579184	317536	276250	1947700	331010	516736	218384	283782	228502	328108	243892	377153	264280	218026	218254	1069800	1061600
P26339	P26339	Chga	Chromogranin-A;Pancreastatin;Beta-granin;WE-14;Catestatin;GE-25;Serpinin-RRG;Serpinin;p-Glu serpinin precursor	sp|P26339|CMGA_MOUSE Chromogranin-A OS=Mus musculus OX=10090 GN=Chga PE=1 SV=1	3	3098300	2617900	2571300	2307300	2317400	4617500	447227	1118900	2596100	1769400	2394200	3301600	2049000	1597200	2214700	2833200	2013800	1554800	1573500	1648100	1899100	1835700	283782	228502	2807200	1961200	3190600	1802400	1754400	218254	1558600	1425100
P31725	P31725	S100a9	Protein S100-A9	sp|P31725|S10A9_MOUSE Protein S100-A9 OS=Mus musculus OX=10090 GN=S100a9 PE=1 SV=3	1	7340500	5422500	5977000	505140	4454200	5485400	8762700	486744	10782000	318575	409407	455300	23233000	10099000	3247700	3497100	10070000	8392400	5667000	3446200	5767200	6697800	5515000	5593000	8066500	2545200	5099900	264280	7439700	8895300	6317100	352503
P32848	P32848	Pvalb	Parvalbumin alpha	sp|P32848|PRVA_MOUSE Parvalbumin alpha OS=Mus musculus OX=10090 GN=Pvalb PE=1 SV=3	5	157370000	52702000	43159000	212630000	32031000	312961	447227	486744	519823	318575	394740000	219310000	345618	170466	190592	579184	59146000	276250	36851000	331010	25081000	30855000	283782	58481000	24570000	15288000	377153	32948000	91615000	192050000	458622	352503
P34884	P34884	Mif	Macrophage migration inhibitory factor	sp|P34884|MIF_MOUSE Macrophage migration inhibitory factor OS=Mus musculus OX=10090 GN=Mif PE=1 SV=2	1	1720700	1116100	1653700	1981700	1110000	1833700	3086500	1467000	519823	318575	3033400	3843600	2124200	1452100	538870	1998400	3206700	276250	1473200	331010	516736	2127000	1362200	2040000	328108	243892	377153	1495400	1055600	1841200	458622	352503
P34914	P34914;A8JYK8;P34914-2	Ephx2	Bifunctional epoxide hydrolase 2;Cytosolic epoxide hydrolase 2;Lipid-phosphate phosphatase	sp|P34914|HYES_MOUSE Bifunctional epoxide hydrolase 2 OS=Mus musculus OX=10090 GN=Ephx2 PE=1 SV=2;tr|A8JYK8|A8JYK8_MOUSE Bifunctional epoxide hydrolase 2 OS=Mus musculus OX=10090 GN=Ephx2 PE=1 SV=1;sp|P34914-2|HYES_MOUSE Isoform 2 of Bifunctional epoxide h	2	681380	598482	822990	505140	298806	312961	447227	486744	519823	318575	720820	2508400	345618	170466	190592	579184	317536	276250	223377	331010	516736	218384	283782	647770	328108	243892	377153	264280	218026	218254	458622	352503
P47867-2	P47867-2;P47867	Scg3	Secretogranin-3	sp|P47867-2|SCG3_MOUSE Isoform 2 of Secretogranin-3 OS=Mus musculus OX=10090 GN=Scg3;sp|P47867|SCG3_MOUSE Secretogranin-3 OS=Mus musculus OX=10090 GN=Scg3 PE=1 SV=1	1	2625300	2214200	3057800	1977800	1980000	312961	2633100	1456400	2119500	2639300	2383200	1595700	1206500	170466	1974100	2209500	1230100	276250	223377	331010	516736	218384	283782	228502	328108	596660	377153	264280	1566600	218254	458622	352503
P48031	P48031	Gbx2	Homeobox protein GBX-2	sp|P48031|GBX2_MOUSE Homeobox protein GBX-2 OS=Mus musculus OX=10090 GN=Gbx2 PE=2 SV=1	1	591246	598482	23576000	21725000	30663000	29512000	22661000	30007000	22172000	25110000	29017000	32920000	27720000	30276000	41796000	29243000	26213000	24275000	20691000	21026000	516736	88440000	25044000	20654000	34151000	243892	377153	264280	23245000	23337000	458622	21751000
P49183	P49183;H3BJN9;D3YXC7;H3BKL7;E9Q797	Dnase1	Deoxyribonuclease-1	sp|P49183|DNAS1_MOUSE Deoxyribonuclease-1 OS=Mus musculus OX=10090 GN=Dnase1 PE=1 SV=2;tr|H3BJN9|H3BJN9_MOUSE Deoxyribonuclease-1 (Fragment) OS=Mus musculus OX=10090 GN=Dnase1 PE=3 SV=1;tr|D3YXC7|D3YXC7_MOUSE Deoxyribonuclease-1 (Fragment) OS=Mus musculus	2	4753000	2525400	406906	505140	298806	3989900	447227	486744	519823	3252800	2515000	1933000	345618	170466	190592	2085500	317536	2552000	1913200	331010	516736	2087800	283782	228502	328108	243892	377153	264280	218026	218254	458622	352503
P49429	P49429;F6X9Z6;D3Z1U3	Hpd	4-hydroxyphenylpyruvate dioxygenase	sp|P49429|HPPD_MOUSE 4-hydroxyphenylpyruvate dioxygenase OS=Mus musculus OX=10090 GN=Hpd PE=1 SV=3	4	1918100	1632300	738740	505140	409050	312961	447227	486744	519823	961370	409407	15566000	345618	170466	190592	949670	317536	276250	223377	331010	516736	218384	283782	228502	328108	243892	377153	1481700	218026	218254	458622	352503
P50247	P50247;A2ALT5	Ahcy	Adenosylhomocysteinase	sp|P50247|SAHH_MOUSE Adenosylhomocysteinase OS=Mus musculus OX=10090 GN=Ahcy PE=1 SV=3	8	4880900	800140	1682800	880040	1497600	2989000	447227	642270	1038600	318575	2295300	32341000	1243800	560890	190592	3135300	1332000	276250	535490	331010	767850	1403400	650390	228502	328108	629590	377153	5889000	218026	218254	458622	352503
P51437	P51437	Camp	Cathelin-related antimicrobial peptide	sp|P51437|CAMP_MOUSE Cathelicidin antimicrobial peptide OS=Mus musculus OX=10090 GN=Camp PE=1 SV=2	1	6934700	12937000	10473000	5262800	5273500	3570700	12021000	7258800	12354000	6662000	5965500	8841900	10529000	10632000	6053000	4327900	11805000	12826000	9429200	12662000	8889200	11817000	8439700	10168000	11987000	4421000	8723000	9722400	7989800	6702000	9366900	6952600
P52480	P52480	Pkm	Pyruvate kinase PKM	sp|P52480|KPYM_MOUSE Pyruvate kinase PKM OS=Mus musculus OX=10090 GN=Pkm PE=1 SV=4	2	591246	598482	4130200	505140	2681800	7619500	4711900	486744	519823	318575	4017000	3959900	3279000	170466	190592	3786900	2427900	276250	223377	331010	516736	3143300	3211200	2495000	2519100	2976600	377153	264280	218026	218254	458622	352503
P52760	P52760	Hrsp12	Ribonuclease UK114	sp|P52760|RIDA_MOUSE 2-iminobutanoate/2-iminopropanoate deaminase OS=Mus musculus OX=10090 GN=Rida PE=1 SV=3	3	591246	598482	1787500	1951800	2757000	312961	447227	486744	519823	318575	2120700	10311000	345618	170466	1528500	4667800	317536	276250	223377	331010	516736	218384	283782	228502	328108	243892	377153	1854500	218026	218254	458622	352503
P58252	P58252	Eef2	Elongation factor 2	sp|P58252|EF2_MOUSE Elongation factor 2 OS=Mus musculus OX=10090 GN=Eef2 PE=1 SV=2	8	2829300	639660	624870	909020	1243400	2017400	16008000	425640	519823	318575	1418400	1926700	1210600	1076200	698980	1976100	1729000	4247700	223377	514440	516736	2652100	801250	2734900	328108	955860	492890	1598400	486600	534060	458622	352503
P60710	P60710;E9Q1F2;E9Q5F4;G3UZ07;F8WGM8;Q8BFZ3;E9Q2D1;F6WX90;E9Q3M9	Actb	Actin, cytoplasmic 1;Actin, cytoplasmic 1, N-terminally processed	sp|P60710|ACTB_MOUSE Actin, cytoplasmic 1 OS=Mus musculus OX=10090 GN=Actb PE=1 SV=1;tr|E9Q1F2|E9Q1F2_MOUSE Actin, cytoplasmic 1 OS=Mus musculus OX=10090 GN=Actb PE=1 SV=1;tr|E9Q5F4|E9Q5F4_MOUSE Actin, cytoplasmic 1 (Fragment) OS=Mus musculus OX=10090 GN=A	1	22691000	17585000	14214000	8457000	13703000	15363000	12452000	9553400	10361000	318575	11872000	3678700	16519000	13074000	5404300	14480000	11273000	14588000	5691300	10188000	9688800	8685900	8208400	7191700	7832200	6853300	3047800	5003000	8723700	2942700	458622	5396500
P62259	P62259;F6WA09;D6REF3	Ywhae	14-3-3 protein epsilon	sp|P62259|1433E_MOUSE 14-3-3 protein epsilon OS=Mus musculus OX=10090 GN=Ywhae PE=1 SV=1;tr|F6WA09|F6WA09_MOUSE 14-3-3 protein epsilon (Fragment) OS=Mus musculus OX=10090 GN=Ywhae PE=1 SV=1	2	6863900	2563000	3351200	3182800	3254100	3930200	3868100	2670700	519823	318575	3836500	4058900	2617800	3488100	2507800	4090300	2977700	276250	3121600	331010	516736	3141000	2429900	2687700	328108	2399800	2688000	2576700	218026	3421600	458622	352503
P70296	P70296;D6RHS6;D3Z1V4	Pebp1	Phosphatidylethanolamine-binding protein 1;Hippocampal cholinergic neurostimulating peptide	sp|P70296|PEBP1_MOUSE Phosphatidylethanolamine-binding protein 1 OS=Mus musculus OX=10090 GN=Pebp1 PE=1 SV=3;tr|D6RHS6|D6RHS6_MOUSE Phosphatidylethanolamine-binding protein 1 OS=Mus musculus OX=10090 GN=Pebp1 PE=1 SV=1;tr|D3Z1V4|D3Z1V4_MOUSE Phosphatidylet	4	5390300	598482	5190600	4396300	4304000	5122300	447227	486744	519823	318575	7292000	9543300	3972800	4279100	190592	4809100	4592600	276250	3019300	331010	516736	8145200	283782	5018400	328108	243892	377153	4328200	218026	8911000	458622	352503
P70697	P70697;A0A0A0MQG7	Urod	Uroporphyrinogen decarboxylase	sp|P70697|DCUP_MOUSE Uroporphyrinogen decarboxylase OS=Mus musculus OX=10090 GN=Urod PE=1 SV=2;tr|A0A0A0MQG7|A0A0A0MQG7_MOUSE Uroporphyrinogen decarboxylase (Fragment) OS=Mus musculus OX=10090 GN=Urod PE=1 SV=1	2	6220900	3320200	4404400	3717200	1626600	2851300	447227	486744	519823	7329700	409407	3351300	345618	170466	190592	3708600	317536	276250	223377	331010	516736	218384	283782	228502	328108	243892	377153	264280	218026	218254	458622	352503
Q02053	Q02053	Uba1	Ubiquitin-like modifier-activating enzyme 1	sp|Q02053|UBA1_MOUSE Ubiquitin-like modifier-activating enzyme 1 OS=Mus musculus OX=10090 GN=Uba1 PE=1 SV=1	3	591246	598482	406906	505140	298806	312961	447227	486744	519823	318575	409407	3182400	345618	170466	190592	3046600	317536	276250	223377	331010	516736	218384	283782	228502	328108	243892	377153	264280	218026	218254	458622	352503
Q07235	Q07235;A0A087WQM1;A0A087WQ70	Serpine2	Glia-derived nexin	sp|Q07235|GDN_MOUSE Glia-derived nexin OS=Mus musculus OX=10090 GN=Serpine2 PE=1 SV=2;tr|A0A087WQM1|A0A087WQM1_MOUSE Glia-derived nexin (Fragment) OS=Mus musculus OX=10090 GN=Serpine2 PE=1 SV=1;tr|A0A087WQ70|A0A087WQ70_MOUSE Glia-derived nexin (Fragment) O	4	591246	598482	1332400	505140	298806	312961	447227	486744	519823	318575	5364400	3555000	1618900	2948400	1212200	1596400	317536	1749600	4212000	2625600	516736	5535800	283782	228502	328108	243892	1099000	2166700	1772000	3233100	458622	352503
Q07797	Q07797	Lgals3bp	Galectin-3-binding protein	sp|Q07797|LG3BP_MOUSE Galectin-3-binding protein OS=Mus musculus OX=10090 GN=Lgals3bp PE=1 SV=1	1	4830500	598482	406906	505140	298806	2391300	447227	486744	519823	318575	3923700	2217700	345618	170466	190592	579184	317536	276250	2627000	331010	516736	218384	283782	228502	328108	243892	377153	264280	218026	218254	458622	352503
Q2VLH6	Q2VLH6;Q2VLH6-2	Cd163	Scavenger receptor cysteine-rich type 1 protein M130;Soluble CD163	sp|Q2VLH6|C163A_MOUSE Scavenger receptor cysteine-rich type 1 protein M130 OS=Mus musculus OX=10090 GN=Cd163 PE=1 SV=2;sp|Q2VLH6-2|C163A_MOUSE Isoform 2 of Scavenger receptor cysteine-rich type 1 protein M130 OS=Mus musculus OX=10090 GN=Cd163	3	591246	8051300	9696900	505140	298806	7732400	9052800	6807100	519823	318575	7901900	7370600	345618	10226000	7997500	579184	5663800	7021600	5300900	6333700	5065100	4795100	5566700	6355400	4676000	243892	3962500	3747500	6241500	4819200	5047600	4473200
Q3TVK3	Q3TVK3;Q9Z2W0;Q8BPW9;A0A087WS31;A0A087WSE6	Dnpep	Aspartyl aminopeptidase	tr|Q3TVK3|Q3TVK3_MOUSE Aspartyl aminopeptidase OS=Mus musculus OX=10090 GN=Dnpep PE=1 SV=1;sp|Q9Z2W0|DNPEP_MOUSE Aspartyl aminopeptidase OS=Mus musculus OX=10090 GN=Dnpep PE=1 SV=2;tr|Q8BPW9|Q8BPW9_MOUSE Aspartyl aminopeptidase OS=Mus musculus OX=10090 GN=	7	8748300	2058300	7699000	505140	5041700	12256000	5698500	4310300	6482300	4950700	4279300	5987600	6889100	4359200	4082900	10372000	6164300	4461600	223377	3973700	3173600	5043700	2816300	2651800	2759100	4651100	2932400	1927500	3618000	2943300	984080	2603800
Q3TYU0	Q3TYU0;P27656	Lipc	Hepatic triacylglycerol lipase	tr|Q3TYU0|Q3TYU0_MOUSE Hepatic triacylglycerol lipase OS=Mus musculus OX=10090 GN=Lipc PE=1 SV=1;sp|P27656|LIPC_MOUSE Hepatic triacylglycerol lipase OS=Mus musculus OX=10090 GN=Lipc PE=2 SV=2	3	591246	598482	5609300	5994500	298806	312961	6617400	486744	7328300	6634300	409407	5729000	345618	4995200	190592	579184	317536	276250	223377	331010	516736	218384	283782	228502	328108	243892	377153	264280	218026	218254	458622	352503
Q3UEL5	Q3UEL5;Q8VC12	Uroc1	Urocanate hydratase	tr|Q3UEL5|Q3UEL5_MOUSE Imidazolonepropionate hydrolase OS=Mus musculus OX=10090 GN=Uroc1 PE=1 SV=1;sp|Q8VC12|HUTU_MOUSE Urocanate hydratase OS=Mus musculus OX=10090 GN=Uroc1 PE=1 SV=2	2	591246	437170	429050	304170	298806	312961	447227	486744	519823	318575	409407	1330400	345618	170466	190592	579184	317536	276250	223377	331010	516736	218384	283782	228502	328108	243892	377153	264280	218026	218254	458622	352503
Q3V2D2	Q3V2D2	Gm94	Uncharacterized protein C5orf46 homolog	sp|Q3V2D2|CE046_MOUSE Uncharacterized protein C5orf46 homolog OS=Mus musculus OX=10090 GN=Gm94 PE=3 SV=1	1	3370000	4838900	4300600	4254100	3812400	312961	4277800	486744	2520800	5782800	4323500	5549000	3391600	18076000	3538600	2934100	4024300	5444900	4776100	4666200	5483400	5367100	3911900	3518200	3359500	243892	5934600	2562200	3950900	218254	3538400	4353300
Q5NCU3	Q5NCU3;Q5NCU4;A0A1L1SSH9;P07214	Sparc	SPARC	tr|Q5NCU3|Q5NCU3_MOUSE Osteonectin (Fragment) OS=Mus musculus OX=10090 GN=Sparc PE=1 SV=1;tr|Q5NCU4|Q5NCU4_MOUSE Osteonectin OS=Mus musculus OX=10090 GN=Sparc PE=1 SV=1;tr|A0A1L1SSH9|A0A1L1SSH9_MOUSE Osteonectin OS=Mus musculus OX=10090 GN=Sparc PE=1 SV=1;	1	3641200	2292200	2888200	505140	2420100	4700600	3309800	1802300	519823	1992900	409407	455300	345618	3075200	3093300	4104700	317536	276250	223377	331010	516736	218384	283782	228502	328108	2307500	377153	1540700	218026	218254	458622	1308700
Q60648	Q60648	Gm2a	Ganglioside GM2 activator	sp|Q60648|SAP3_MOUSE Ganglioside GM2 activator OS=Mus musculus OX=10090 GN=Gm2a PE=1 SV=2	1	591246	4130300	4156300	3094200	3695800	3021700	3656800	2387600	5965500	2236000	3940400	3425000	4131000	3543500	190592	3144100	317536	276250	3490000	2558400	4456800	3021500	2462200	4416800	2520300	243892	4334400	2356900	2922900	4365400	2297000	2842500
Q61176	Q61176	Arg1	Arginase-1	sp|Q61176|ARGI1_MOUSE Arginase-1 OS=Mus musculus OX=10090 GN=Arg1 PE=1 SV=1	5	245230	1324300	1278900	110830	570430	150180	447227	486744	519823	119410	129530	24791000	345618	170466	190592	961580	317536	84529	223377	331010	516736	218384	283782	228502	328108	92997	377153	652120	218026	218254	458622	352503
Q61598-2	Q61598-2;Q61598;A0A1Y7VLG4;A0A1Y7VL99	Gdi2	Rab GDP dissociation inhibitor beta	sp|Q61598-2|GDIB_MOUSE Isoform 2 of Rab GDP dissociation inhibitor beta OS=Mus musculus OX=10090 GN=Gdi2;sp|Q61598|GDIB_MOUSE Rab GDP dissociation inhibitor beta OS=Mus musculus OX=10090 GN=Gdi2 PE=1 SV=1;tr|A0A1Y7VLG4|A0A1Y7VLG4_MOUSE Rab GDP dissociation	2	2591700	1084400	2111600	2069700	1212700	2063100	3276100	486744	937080	318575	3117800	3715200	345618	170466	190592	2933100	2498100	1853900	1751400	1280200	806600	3314200	1769700	2972800	328108	243892	377153	1200400	1508100	1854300	458622	352503
Q61982	Q61982	Notch3	Neurogenic locus notch homolog protein 3;Notch 3 extracellular truncation;Notch 3 intracellular domain	sp|Q61982|NOTC3_MOUSE Neurogenic locus notch homolog protein 3 OS=Mus musculus OX=10090 GN=Notch3 PE=1 SV=1	2	628430	423640	721280	832490	298806	741640	456480	543280	585700	318575	479070	363390	690550	334120	190592	743350	317536	442780	223377	410160	516736	383600	426780	228502	328108	332130	377153	280950	445410	261030	424530	369000
Q62000	Q62000	Ogn	Mimecan	sp|Q62000|MIME_MOUSE Mimecan OS=Mus musculus OX=10090 GN=Ogn PE=1 SV=1	1	915030	1075500	950230	996300	1096300	819260	632400	566400	519823	625510	1409100	950570	1187400	1401000	616110	985830	1132600	812770	492000	776430	622760	858430	777860	742590	416760	567310	1287200	736450	880150	807780	458622	352503
Q62087	Q62087;H3BL07	Pon3	Serum paraoxonase/lactonase 3	sp|Q62087|PON3_MOUSE Serum paraoxonase/lactonase 3 OS=Mus musculus OX=10090 GN=Pon3 PE=1 SV=2	3	4774200	6754400	5807900	5538400	3665100	312961	447227	486744	4084700	7393100	5682100	3505400	5179500	5502800	190592	579184	5944100	6472900	5040500	6258400	3817500	4795100	4177500	228502	2837600	2689000	4771100	3234200	5926500	3948200	6259000	2895600
Q62165	Q62165	Dag1	Dystroglycan;Alpha-dystroglycan;Beta-dystroglycan	sp|Q62165|DAG1_MOUSE Dystroglycan OS=Mus musculus OX=10090 GN=Dag1 PE=1 SV=4	2	591246	4085300	406906	2695100	298806	312961	447227	486744	3139000	318575	3988200	455300	345618	4137600	4020700	4356200	5198800	4139800	223377	331010	4186900	218384	283782	228502	328108	243892	4118900	264280	218026	3616200	458622	352503
Q62383	Q62383	Supt6h	Transcription elongation factor SPT6	sp|Q62383|SPT6H_MOUSE Transcription elongation factor SPT6 OS=Mus musculus OX=10090 GN=Supt6h PE=1 SV=2	2	18062000	598482	15722000	505140	298806	9700700	447227	10550000	519823	14869000	409407	4226600	345618	15930000	13518000	22216000	317536	19803000	10019000	331010	516736	218384	283782	228502	328108	9294100	10854000	264280	14159000	12121000	7310600	11152000
Q62469	Q62469	Itga2	Integrin alpha-2	sp|Q62469|ITA2_MOUSE Integrin alpha-2 OS=Mus musculus OX=10090 GN=Itga2 PE=1 SV=2	5	2566300	2222900	406906	505140	298806	2469400	2672200	486744	2625800	318575	2248200	455300	2375300	2343800	2039400	2902800	317536	276250	223377	331010	2146300	2325600	283782	1703100	328108	243892	377153	264280	218026	2020800	458622	2494200
Q64285	Q64285	Cel	Bile salt-activated lipase	sp|Q64285|CEL_MOUSE Bile salt-activated lipase OS=Mus musculus OX=10090 GN=Cel PE=1 SV=1	2	591246	598482	406906	505140	298806	312961	447227	486744	519823	318575	409407	455300	345618	170466	190592	579184	317536	276250	223377	331010	516736	218384	283782	228502	328108	243892	377153	264280	218026	218254	458622	352503
Q64339	Q64339	Isg15	Ubiquitin-like protein ISG15	sp|Q64339|ISG15_MOUSE Ubiquitin-like protein ISG15 OS=Mus musculus OX=10090 GN=Isg15 PE=1 SV=4	2	3050900	598482	406906	3840000	2806500	6075000	6764300	3182800	519823	318575	6007200	6619000	4865900	170466	190592	7407000	4710100	2547900	223377	331010	516736	5935700	283782	7093000	328108	243892	377153	264280	218026	3507600	458622	352503
Q64374	Q64374	Rgn	Regucalcin	sp|Q64374|RGN_MOUSE Regucalcin OS=Mus musculus OX=10090 GN=Rgn PE=1 SV=1	5	591246	598482	406906	505140	298806	553690	447227	486744	519823	318575	675800	24563000	345618	170466	190592	1166000	317536	276250	223377	331010	516736	218384	283782	228502	328108	243892	377153	1572500	218026	218254	458622	352503
Q64739-7	Q64739-7;Q64739-1;Q64739-5;Q64739-6;Q64739-4;Q64739-3;Q64739	Col11a2	Collagen alpha-2(XI) chain	sp|Q64739-7|COBA2_MOUSE Isoform 6 of Collagen alpha-2(XI) chain OS=Mus musculus OX=10090 GN=Col11a2;sp|Q64739-1|COBA2_MOUSE Isoform 7 of Collagen alpha-2(XI) chain OS=Mus musculus OX=10090 GN=Col11a2;sp|Q64739-5|COBA2_MOUSE Isoform 4 of Collagen alpha-2(XI	2	2412600	2509900	3655900	2097100	4047400	4568800	4199900	2988500	1885000	318575	3754700	3347300	4404400	4150000	3255200	3470000	2231400	3077700	2250600	2051000	2537000	2104600	2880700	2560900	328108	1418300	3217300	2034600	3284400	2892500	2388800	2267100
Q6GT24	Q6GT24;O08709;D3Z0Y2;Q8BG37	Prdx6	Peroxiredoxin-6	tr|Q6GT24|Q6GT24_MOUSE Peroxiredoxin-6 OS=Mus musculus OX=10090 GN=Prdx6 PE=1 SV=1;sp|O08709|PRDX6_MOUSE Peroxiredoxin-6 OS=Mus musculus OX=10090 GN=Prdx6 PE=1 SV=3;tr|D3Z0Y2|D3Z0Y2_MOUSE Peroxiredoxin-6 OS=Mus musculus OX=10090 GN=Prdx6 PE=1 SV=1	8	7472500	3236400	6432500	5699300	6131500	4623200	7349800	2952000	2488500	318575	11182000	31073000	5383700	5271000	2362300	9351400	9139400	4931800	4444100	1177000	2928400	9468900	2312500	7611700	328108	243892	1152300	5517800	3238700	5133200	585070	1558200
Q6IRU2	Q6IRU2	Tpm4	Tropomyosin alpha-4 chain	sp|Q6IRU2|TPM4_MOUSE Tropomyosin alpha-4 chain OS=Mus musculus OX=10090 GN=Tpm4 PE=1 SV=3	1	591246	598482	1178900	505140	298806	312961	1144900	486744	519823	318575	1590200	802270	345618	170466	190592	579184	317536	1012700	1241200	331010	516736	218384	1161600	228502	328108	243892	377153	264280	218026	218254	458622	907170
Q6P8U6	Q6P8U6;A0A494B914	Pnlip	Pancreatic triacylglycerol lipase	sp|Q6P8U6|LIPP_MOUSE Pancreatic triacylglycerol lipase OS=Mus musculus OX=10090 GN=Pnlip PE=1 SV=1;tr|A0A494B914|A0A494B914_MOUSE Pancreatic triacylglycerol lipase (Fragment) OS=Mus musculus OX=10090 GN=Pnlip PE=1 SV=1	9	591246	598482	406906	505140	298806	312961	447227	486744	519823	318575	409407	455300	345618	170466	190592	579184	317536	276250	223377	331010	516736	218384	283782	228502	328108	243892	377153	264280	218026	218254	458622	352503
Q6PAP2	Q6PAP2;Q06806	Tie1	Tyrosine-protein kinase receptor Tie-1	tr|Q6PAP2|Q6PAP2_MOUSE Tie1 protein OS=Mus musculus OX=10090 GN=Tie1 PE=1 SV=1;sp|Q06806|TIE1_MOUSE Tyrosine-protein kinase receptor Tie-1 OS=Mus musculus OX=10090 GN=Tie1 PE=1 SV=3	1	1997600	598482	406906	851300	874400	985660	447227	975140	721520	318575	409407	455300	345618	170466	190592	579184	317536	276250	828390	331010	516736	218384	957620	884550	328108	243892	377153	264280	218026	218254	458622	352503
Q6PDE7-2	Q6PDE7-2;Q6PDE7	Ggt6	Gamma-glutamyltransferase 6;Gamma-glutamyltransferase 6 heavy chain;Gamma-glutamyltransferase 6 light chain	sp|Q6PDE7-2|GGT6_MOUSE Isoform 2 of Glutathione hydrolase 6 OS=Mus musculus OX=10090 GN=Ggt6;sp|Q6PDE7|GGT6_MOUSE Glutathione hydrolase 6 OS=Mus musculus OX=10090 GN=Ggt6 PE=2 SV=1	1	1074400	1733600	2315200	2581700	298806	312961	1820100	486744	1370900	318575	1151600	455300	1536700	170466	920480	579184	317536	276250	223377	331010	516736	218384	283782	228502	328108	243892	377153	264280	218026	218254	458622	352503
Q792Z1	Q792Z1	Try10	Trypsin 10	tr|Q792Z1|Q792Z1_MOUSE Trypsin 10 OS=Mus musculus OX=10090 GN=Try10 PE=1 SV=1	1	53467000	58626000	59487000	46231000	38521000	48485000	51457000	42593000	52292000	53703000	39094000	36636000	33737000	170466	42626000	43792000	59420000	42981000	44735000	49706000	49096000	48863000	45334000	46859000	44019000	33094000	44186000	32901000	55603000	38500000	39539000	27243000
Q7TPZ8	Q7TPZ8	Cpa1	Carboxypeptidase A1	sp|Q7TPZ8|CBPA1_MOUSE Carboxypeptidase A1 OS=Mus musculus OX=10090 GN=Cpa1 PE=1 SV=1	3	591246	598482	406906	505140	298806	312961	447227	486744	519823	318575	409407	455300	345618	170466	190592	579184	317536	276250	223377	331010	516736	218384	283782	228502	328108	243892	377153	264280	218026	218254	458622	352503
Q7TQG5	Q7TQG5;E9QK04;P97798-5;P97798-2;P97798-3;P97798-4;P97798;A0A1L1SRD6	Neo1	Neogenin	tr|Q7TQG5|Q7TQG5_MOUSE Neogenin OS=Mus musculus OX=10090 GN=Neo1 PE=1 SV=1;tr|E9QK04|E9QK04_MOUSE Neogenin OS=Mus musculus OX=10090 GN=Neo1 PE=1 SV=1;sp|P97798-5|NEO1_MOUSE Isoform 5 of Neogenin OS=Mus musculus OX=10090 GN=Neo1;sp|P97798-2|NEO1_MOUSE Isofo	4	2272900	598482	406906	505140	298806	3457500	447227	486744	519823	318575	409407	455300	345618	170466	190592	2746700	317536	276250	223377	331010	516736	218384	283782	228502	328108	243892	377153	264280	218026	218254	458622	352503
Q8BH00	Q8BH00	Aldh8a1	Aldehyde dehydrogenase family 8 member A1	sp|Q8BH00|AL8A1_MOUSE 2-aminomuconic semialdehyde dehydrogenase OS=Mus musculus OX=10090 GN=Aldh8a1 PE=1 SV=1	3	4576900	2520800	3654600	505140	298806	312961	447227	486744	519823	318575	409407	4362500	345618	170466	190592	579184	317536	276250	223377	331010	516736	218384	283782	228502	328108	243892	377153	264280	218026	218254	458622	352503
Q8BRK9-2	Q8BRK9-2;Q8BRK9	Man2a2	Alpha-mannosidase 2x	sp|Q8BRK9-2|MA2A2_MOUSE Isoform 2 of Alpha-mannosidase 2x OS=Mus musculus OX=10090 GN=Man2a2;sp|Q8BRK9|MA2A2_MOUSE Alpha-mannosidase 2x OS=Mus musculus OX=10090 GN=Man2a2 PE=1 SV=2	2	2584400	1644400	2041700	2450700	1914200	2087100	1657000	486744	1821100	1411900	409407	1528400	2151300	1803100	190592	2837000	1772900	1690900	1014500	1817100	1829200	1765900	283782	228502	328108	789550	377153	1111000	1826500	1283100	458622	352503
Q8BWP8-2	Q8BWP8-2;Q8BWP8	B4gat1	Beta-1,4-glucuronyltransferase 1	sp|Q8BWP8-2|B4GA1_MOUSE Isoform 2 of Beta-1,4-glucuronyltransferase 1 OS=Mus musculus OX=10090 GN=B4gat1;sp|Q8BWP8|B4GA1_MOUSE Beta-1,4-glucuronyltransferase 1 OS=Mus musculus OX=10090 GN=B4gat1 PE=1 SV=1	1	3035700	2600800	2092400	2606400	2126800	312961	1645300	486744	519823	1640300	2039400	455300	2322000	170466	190592	2334200	2449600	2708900	1097500	1820500	1737100	1669100	3046800	1637400	328108	1182600	1036200	264280	2159500	1598900	458622	1325300
Q8C1K5	Q8C1K5;A2BG90;E9Q9K2;A2ARX2;A2BFU4;A2ART0;A2ARL5;A2BG91	Gm6710;Gm14295;Gm14419;Gm14391;Gm14403	Predicted gene 14391	tr|Q8C1K5|Q8C1K5_MOUSE Predicted gene 14391 OS=Mus musculus OX=10090 GN=Gm14391 PE=2 SV=1;tr|A2BG90|A2BG90_MOUSE Novel KRAB box and zinc finger, C2H2 type domain containing protein OS=Mus musculus OX=10090 GN=Gm14295 PE=4 SV=1;tr|E9Q9K2|E9Q9K2_MOUSE Predic	1	591246	598482	12537000	11710000	298806	9812400	14366000	8262200	11367000	11094000	409407	6390900	15220000	170466	6774100	579184	6466300	9669400	223377	331010	6749200	218384	283782	9929700	11301000	3927800	8885300	3498000	218026	218254	6455500	10154000
Q8C6G3	Q8C6G3;P00683	Rnase1	Ribonuclease pancreatic	tr|Q8C6G3|Q8C6G3_MOUSE Ribonuclease pancreatic OS=Mus musculus OX=10090 GN=Rnase1 PE=1 SV=1;sp|P00683|RNAS1_MOUSE Ribonuclease pancreatic OS=Mus musculus OX=10090 GN=Rnase1 PE=1 SV=2	2	591246	598482	406906	505140	6587000	312961	447227	486744	458460	318575	409407	455300	345618	170466	190592	579184	317536	276250	223377	331010	516736	218384	283782	228502	328108	243892	377153	264280	218026	218254	458622	352503
Q8CBR6	Q8CBR6	Tsku	Tsukushin	sp|Q8CBR6|TSK_MOUSE Tsukushin OS=Mus musculus OX=10090 GN=Tsku PE=2 SV=2	1	591246	598482	406906	574340	298806	396670	504540	493860	611180	627600	369030	455300	345618	435560	358720	331500	773190	447820	392700	352030	226260	264130	321270	283690	328108	205820	403100	251500	218026	414890	489000	338450
Q8CI94	Q8CI94;Q3UEJ6;Q9ET01	Pygb;Pygl	Glycogen phosphorylase, brain form;Alpha-1,4 glucan phosphorylase;Glycogen phosphorylase, liver form	sp|Q8CI94|PYGB_MOUSE Glycogen phosphorylase, brain form OS=Mus musculus OX=10090 GN=Pygb PE=1 SV=3;tr|Q3UEJ6|Q3UEJ6_MOUSE Alpha-1,4 glucan phosphorylase OS=Mus musculus OX=10090 GN=Pygl PE=1 SV=1;sp|Q9ET01|PYGL_MOUSE Glycogen phosphorylase, liver form OS=M	2	591246	598482	4577700	505140	298806	312961	447227	486744	519823	318575	409407	455300	345618	170466	190592	579184	317536	276250	223377	331010	516736	218384	283782	228502	328108	243892	377153	264280	8123400	218254	4276500	352503
Q8K0E8	Q8K0E8	Fgb	Fibrinogen beta chain;Fibrinopeptide B;Fibrinogen beta chain	sp|Q8K0E8|FIBB_MOUSE Fibrinogen beta chain OS=Mus musculus OX=10090 GN=Fgb PE=1 SV=1	33	914260000	6633100000	379920	870320000	19839	149660	833660000	2834700000	3256300000	7122800000	409407	455300	44099000	299230	87407000	579184	5587800	1041700000	223377	274180	4335700000	11013	79521000	229980	4543900000	3377900000	377153	9011	11653	200780	214700000	4146100000
Q8K183	Q8K183	Pdxk	Pyridoxal kinase	sp|Q8K183|PDXK_MOUSE Pyridoxal kinase OS=Mus musculus OX=10090 GN=Pdxk PE=1 SV=1	1	591246	2091300	2493100	2010200	2201500	4647600	1703500	1422000	519823	318575	1769900	2394700	2333100	170466	190592	1986800	2282100	276250	223377	1423100	516736	2377400	283782	228502	328108	243892	377153	264280	218026	218254	458622	352503
Q8K426	Q8K426	Retnlg	Resistin-like gamma	sp|Q8K426|RETNG_MOUSE Resistin-like gamma OS=Mus musculus OX=10090 GN=Retnlg PE=1 SV=1	2	835830	13893000	1823000	505140	298806	312961	447227	486744	1497900	318575	409407	455300	345618	170466	190592	2513900	317536	276250	223377	331010	516736	218384	880010	228502	2336100	1395000	377153	859460	218026	218254	458622	352503
Q8QZR4	Q8QZR4;A0A1L1SUK4	Oaf	Out at first protein homolog	sp|Q8QZR4|OAF_MOUSE Out at first protein homolog OS=Mus musculus OX=10090 GN=Oaf PE=2 SV=1;tr|A0A1L1SUK4|A0A1L1SUK4_MOUSE Out at first protein homolog (Fragment) OS=Mus musculus OX=10090 GN=Oaf PE=1 SV=1	2	591246	598482	406906	505140	298806	312961	447227	486744	519823	318575	409407	455300	345618	170466	190592	579184	317536	276250	223377	331010	516736	218384	283782	228502	328108	243892	377153	264280	218026	218254	458622	352503
Q8R0Y6	Q8R0Y6;A0A0N4SW56	Aldh1l1	Cytosolic 10-formyltetrahydrofolate dehydrogenase	sp|Q8R0Y6|AL1L1_MOUSE Cytosolic 10-formyltetrahydrofolate dehydrogenase OS=Mus musculus OX=10090 GN=Aldh1l1 PE=1 SV=1;tr|A0A0N4SW56|A0A0N4SW56_MOUSE Formyltetrahydrofolate dehydrogenase OS=Mus musculus OX=10090 GN=Aldh1l1 PE=1 SV=1	4	591246	598482	406906	505140	298806	312961	447227	486744	519823	318575	409407	6715400	345618	170466	190592	579184	317536	276250	223377	331010	516736	218384	283782	228502	328108	243892	377153	729200	218026	218254	458622	352503
Q8R0Z6	Q8R0Z6	Angptl6	Angiopoietin-related protein 6	sp|Q8R0Z6|ANGL6_MOUSE Angiopoietin-related protein 6 OS=Mus musculus OX=10090 GN=Angptl6 PE=2 SV=1	1	3051400	2964000	2488100	2512200	298806	312961	447227	486744	2533200	2139700	409407	455300	345618	170466	190592	579184	317536	276250	223377	331010	516736	218384	1779500	228502	1898500	243892	1748800	264280	218026	218254	2163100	2793200
Q8VC30	Q8VC30;Q3UTZ4;A0A494BB96;A0A494BBI2	Dak	Bifunctional ATP-dependent dihydroxyacetone kinase/FAD-AMP lyase (cyclizing);ATP-dependent dihydroxyacetone kinase;FAD-AMP lyase (cyclizing)	sp|Q8VC30|TKFC_MOUSE Triokinase/FMN cyclase OS=Mus musculus OX=10090 GN=Tkfc PE=1 SV=1;tr|Q3UTZ4|Q3UTZ4_MOUSE ATP-dependent dihydroxyacetone kinase OS=Mus musculus OX=10090 GN=Tkfc PE=1 SV=1	4	591246	598482	406906	505140	298806	312961	447227	486744	519823	318575	409407	455300	345618	170466	190592	579184	317536	276250	223377	331010	516736	218384	283782	228502	328108	243892	377153	264280	218026	218254	458622	352503
Q8VCU1	Q8VCU1	Ces3b	Carboxylesterase 3B	sp|Q8VCU1|EST3B_MOUSE Carboxylesterase 3B OS=Mus musculus OX=10090 GN=Ces3b PE=1 SV=2	1	591246	598482	406906	505140	298806	312961	447227	486744	519823	318575	409407	455300	345618	170466	190592	579184	317536	4912600	223377	331010	516736	218384	283782	3685600	2904500	1810200	377153	4850700	2934200	218254	458622	352503
Q8VI78	Q8VI78	Pla1a	Phospholipase A1 member A	sp|Q8VI78|PLA1A_MOUSE Phospholipase A1 member A OS=Mus musculus OX=10090 GN=Pla1a PE=2 SV=3	2	3374800	3182900	406906	505140	2750800	2992700	447227	486744	2582100	3450000	4645600	3227500	2382300	3410100	3331100	3333100	317536	276250	2514000	331010	516736	218384	283782	2253700	2295000	243892	377153	264280	2960100	218254	458622	1422800
Q91V98	Q91V98	Cd248	Endosialin	sp|Q91V98|CD248_MOUSE Endosialin OS=Mus musculus OX=10090 GN=Cd248 PE=1 SV=1	1	1727200	1153000	767590	505140	1036400	1953600	1914700	486744	519823	318575	2139000	455300	345618	170466	190592	876530	317536	276250	223377	331010	672810	218384	283782	228502	328108	243892	377153	264280	218026	218254	458622	352503
Q91WG0	Q91WG0	Ces2c	Acylcarnitine hydrolase	sp|Q91WG0|EST2C_MOUSE Acylcarnitine hydrolase OS=Mus musculus OX=10090 GN=Ces2c PE=1 SV=1	4	591246	598482	406906	3216600	298806	3900800	3259600	3056900	3449900	6610600	3278800	455300	345618	170466	2904800	4895300	4331900	5030600	2147700	3921400	4871400	4059400	4633900	228502	328108	243892	5174700	264280	3920000	4496300	6215800	7607300
Q91WP6	Q91WP6	Serpina3n	Serine protease inhibitor A3N	sp|Q91WP6|SPA3N_MOUSE Serine protease inhibitor A3N OS=Mus musculus OX=10090 GN=Serpina3n PE=1 SV=1	1	7307300	598482	8789200	505140	7452900	312961	10280000	4886500	10591000	7160900	409407	6878600	8210700	7961900	5821700	6222700	317536	276250	4272500	331010	6519000	218384	283782	228502	328108	6533100	7477800	3001000	16270000	7479100	458622	352503
Q91X83	Q91X83;A0A286YCQ9	Mat1a	S-adenosylmethionine synthase isoform type-1	sp|Q91X83|METK1_MOUSE S-adenosylmethionine synthase isoform type-1 OS=Mus musculus OX=10090 GN=Mat1a PE=1 SV=1;tr|A0A286YCQ9|A0A286YCQ9_MOUSE S-adenosylmethionine synthase isoform type-1 (Fragment) OS=Mus musculus OX=10090 GN=Mat1a PE=1 SV=1	2	591246	598482	406906	505140	298806	312961	447227	486744	519823	318575	409407	455300	345618	170466	190592	579184	317536	276250	223377	331010	516736	218384	283782	228502	328108	243892	377153	264280	218026	218254	458622	352503
Q91XA2	Q91XA2	Golm1	Golgi membrane protein 1	sp|Q91XA2|GOLM1_MOUSE Golgi membrane protein 1 OS=Mus musculus OX=10090 GN=Golm1 PE=1 SV=2	4	2850800	598482	406906	1658400	298806	5018300	1670500	2153500	2953700	1878700	1957300	1971900	345618	1453600	2395200	4784600	317536	2113800	1140100	1564100	1265700	218384	860830	971840	328108	1381800	377153	999580	1747600	218254	458622	2111700
Q91XA9	Q91XA9	Chia	Acidic mammalian chitinase	sp|Q91XA9|CHIA_MOUSE Acidic mammalian chitinase OS=Mus musculus OX=10090 GN=Chia PE=1 SV=2	1	591246	598482	406906	505140	298806	312961	447227	486744	519823	318575	409407	455300	345618	170466	190592	579184	317536	276250	223377	331010	516736	218384	283782	228502	328108	243892	377153	264280	218026	218254	458622	352503
Q91XE9	Q91XE9	Creb3l3	Cyclic AMP-responsive element-binding protein 3-like protein 3;Processed cyclic AMP-responsive element-binding protein 3-like protein 3	sp|Q91XE9|CR3L3_MOUSE Cyclic AMP-responsive element-binding protein 3-like protein 3 OS=Mus musculus OX=10090 GN=Creb3l3 PE=1 SV=1	1	591246	1963200	406906	1129900	1124000	312961	2342000	1513600	519823	1754700	1329700	455300	345618	1608500	944980	579184	1552600	1618000	1029200	1213700	1406700	1685600	1802600	1617300	1281300	243892	2653800	2101400	1795600	218254	1179500	1111700
Q921I1	Q921I1;F7BAE9;E9Q2Q7;D3YYR8;F7CJN9;E9Q939	Tf	Serotransferrin	sp|Q921I1|TRFE_MOUSE Serotransferrin OS=Mus musculus OX=10090 GN=Tf PE=1 SV=1	11	2589.3	598482	1923.8	505140	3292.4	1346.3	447227	486744	519823	318575	23709000	1851.8	2457.3	2099.4	1698.4	1860.9	3176.1	2348.6	223377	331010	516736	1921.3	283782	2295	328108	243892	377153	264280	1492.6	2553.3	1811.2	352503
Q922D8	Q922D8;A0A1W2P733;A0A1W2P7L5	Mthfd1	C-1-tetrahydrofolate synthase, cytoplasmic;Methylenetetrahydrofolate dehydrogenase;Methenyltetrahydrofolate cyclohydrolase;Formyltetrahydrofolate synthetase;C-1-tetrahydrofolate synthase, cytoplasmic, N-terminally processed	sp|Q922D8|C1TC_MOUSE C-1-tetrahydrofolate synthase, cytoplasmic OS=Mus musculus OX=10090 GN=Mthfd1 PE=1 SV=4;tr|A0A1W2P733|A0A1W2P733_MOUSE C-1-tetrahydrofolate synthase, cytoplasmic OS=Mus musculus OX=10090 GN=Mthfd1 PE=1 SV=1	3	539450	188190	406810	372590	219250	417430	425760	195940	519823	185370	249540	568880	148390	150240	177880	573000	289060	280480	169440	331010	195280	364260	229470	223260	184240	233180	179220	266190	220600	298420	458622	352503
Q99PT1	Q99PT1	Arhgdia	Rho GDP-dissociation inhibitor 1	sp|Q99PT1|GDIR1_MOUSE Rho GDP-dissociation inhibitor 1 OS=Mus musculus OX=10090 GN=Arhgdia PE=1 SV=3	1	4518300	598482	4315400	4333700	4680100	3869900	6892500	486744	519823	318575	10915000	6914600	4750500	4090600	190592	4007100	4334800	5415900	3958500	331010	516736	5665900	283782	228502	328108	243892	377153	264280	6741700	5928600	458622	352503
Q9CPY2	Q9CPY2;D6RGR0;Q9ESK3	Capn10	Calpain-10	tr|Q9CPY2|Q9CPY2_MOUSE Calpain-10 OS=Mus musculus OX=10090 GN=Capn10 PE=2 SV=1;tr|D6RGR0|D6RGR0_MOUSE Calpain-10 OS=Mus musculus OX=10090 GN=Capn10 PE=3 SV=1;sp|Q9ESK3|CAN10_MOUSE Calpain-10 OS=Mus musculus OX=10090 GN=Capn10 PE=2 SV=2	1	20650000	598482	7819800	5613300	16237000	13171000	29597000	4849800	7236300	318575	36604000	18129000	30821000	10410000	2391200	14123000	12372000	15020000	4740200	4927200	17767000	30733000	9920600	7683900	328108	243892	2496600	6854300	16741000	14360000	6000200	5976000
Q9CQ52	Q9CQ52;A2A9U8	Cela3b;Cela3a	Chymotrypsin-like elastase family member 3B	sp|Q9CQ52|CEL3B_MOUSE Chymotrypsin-like elastase family member 3B OS=Mus musculus OX=10090 GN=Cela3b PE=1 SV=1;tr|A2A9U8|A2A9U8_MOUSE Chymotrypsin-like elastase family, member 3A OS=Mus musculus OX=10090 GN=Cela3a PE=4 SV=1	2	591246	598482	406906	505140	20288000	312961	447227	486744	519823	318575	409407	455300	345618	170466	190592	579184	317536	1501900	1147200	331010	516736	218384	283782	1177700	328108	1608000	377153	264280	3107500	218254	458622	352503
Q9CQV8-2	Q9CQV8-2;Q9CQV8;A2A5N1;P68254-2;P68254;P68510;P61982;O70456	Ywhab;Ywhaq;Ywhah;Ywhag;Sfn	14-3-3 protein beta/alpha;14-3-3 protein beta/alpha, N-terminally processed;14-3-3 protein theta;14-3-3 protein eta;14-3-3 protein gamma;14-3-3 protein gamma, N-terminally processed;14-3-3 protein sigma	sp|Q9CQV8-2|1433B_MOUSE Isoform Short of 14-3-3 protein beta/alpha OS=Mus musculus OX=10090 GN=Ywhab;sp|Q9CQV8|1433B_MOUSE 14-3-3 protein beta/alpha OS=Mus musculus OX=10090 GN=Ywhab PE=1 SV=3;tr|A2A5N1|A2A5N1_MOUSE 14-3-3 protein beta/alpha (Fragment) OS=	1	345800	169950	224470	236300	299720	316010	369500	486744	169520	318575	419050	621300	251630	170466	244700	249300	288510	195880	173450	331010	516736	373190	124360	170840	328108	243892	377153	264280	208900	390460	458622	178600
Q9CR35	Q9CR35	Ctrb1	Chymotrypsinogen B;Chymotrypsin B chain A;Chymotrypsin B chain B;Chymotrypsin B chain C	sp|Q9CR35|CTRB1_MOUSE Chymotrypsinogen B OS=Mus musculus OX=10090 GN=Ctrb1 PE=1 SV=1	4	3168800	598482	2492900	505140	82538000	3295500	2522200	486744	519823	318575	2943500	2133200	2680500	6326500	190592	3044400	317536	3068600	4207100	2667900	2600800	2486500	2895500	2999000	328108	3843500	377153	2625600	218026	218254	3178700	3720400
Q9CR86	Q9CR86	Carhsp1	Calcium-regulated heat stable protein 1	sp|Q9CR86|CHSP1_MOUSE Calcium-regulated heat stable protein 1 OS=Mus musculus OX=10090 GN=Carhsp1 PE=1 SV=1	1	591246	598482	406906	505140	298806	1459700	4259000	486744	519823	318575	1710500	455300	345618	170466	190592	579184	1927000	276250	223377	331010	516736	218384	283782	1731700	328108	243892	377153	264280	218026	218254	458622	352503
Q9CY02	Q9CY02	Ahsp	Alpha-hemoglobin-stabilizing protein	sp|Q9CY02|AHSP_MOUSE Alpha-hemoglobin-stabilizing protein OS=Mus musculus OX=10090 GN=Ahsp PE=1 SV=1	1	591246	675010	406906	505140	298806	312961	12178000	486744	519823	318575	960190	455300	345618	170466	190592	579184	2319600	6792700	223377	331010	516736	3836100	283782	3546100	328108	243892	377153	264280	218026	218254	458622	352503
Q9D1B1	Q9D1B1;A0A494BAF5	Cst6	Cystatin E/M	tr|Q9D1B1|Q9D1B1_MOUSE Cystatin E/M OS=Mus musculus OX=10090 GN=Cst6 PE=1 SV=1	3	9844200	7746700	406906	7679300	9512600	8910800	6871000	6249900	6140200	5742900	5988800	6986200	11495000	11122000	190592	5791000	7556800	12327000	6382400	6317500	8042100	7994300	283782	228502	7765500	6626100	377153	264280	5444100	7052400	458622	6766900
Q9D1H9	Q9D1H9	Mfap4	Microfibril-associated glycoprotein 4	sp|Q9D1H9|MFAP4_MOUSE Microfibril-associated glycoprotein 4 OS=Mus musculus OX=10090 GN=Mfap4 PE=1 SV=1	1	5531300	598482	4241000	505140	4833300	6966500	7430100	2688600	3395500	318575	3772900	3462400	3205800	3031400	2199700	6502600	2549300	276250	223377	2311700	2126400	3117500	2274000	3214900	328108	1057000	377153	1445900	3601100	1216700	3085300	1748900
Q9D3H2	Q9D3H2	Obp1a	Odorant-binding protein 1a	sp|Q9D3H2|OBP1A_MOUSE Odorant-binding protein 1a OS=Mus musculus OX=10090 GN=Obp1a PE=1 SV=2	2	591246	4222400	4385100	10292000	298806	312961	447227	486744	519823	318575	4902900	455300	345618	170466	190592	3762100	4672000	7683100	3616600	331010	8592800	4890200	283782	228502	328108	243892	5145600	264280	4663800	218254	3540800	4163000
Q9D7Q1	Q9D7Q1;Q9D7Q1-2	Chit1	Chitotriosidase-1	sp|Q9D7Q1|CHIT1_MOUSE Chitotriosidase-1 OS=Mus musculus OX=10090 GN=Chit1 PE=1 SV=2;sp|Q9D7Q1-2|CHIT1_MOUSE Isoform 2 of Chitotriosidase-1 OS=Mus musculus OX=10090 GN=Chit1	3	3679900	4542200	5477100	505140	3497400	3048600	447227	486744	3091300	2611200	2845200	1874000	4328100	170466	2943800	2003100	4270100	1899000	1765500	2406000	2945200	218384	283782	2187800	328108	1750300	2242000	264280	218026	218254	458622	352503
Q9DBZ1-2	Q9DBZ1-2	Ikbip	Isoform 2 of Inhibitor of nuclear factor kappa-B kinase-interacting protein	sp|Q9DBZ1-2|IKIP_MOUSE Isoform 2 of Inhibitor of nuclear factor kappa-B kinase-interacting protein OS=Mus musculus OX=10090 GN=Ikbip	1	14583000	11664000	18764000	17457000	20862000	28199000	50986000	27575000	12015000	36598000	409407	26089000	28782000	36549000	50945000	34012000	317536	40744000	38679000	39127000	24011000	16543000	54682000	22866000	67086000	25454000	80648000	9832700	218026	59461000	64457000	46946000
Q9EQ08	Q9EQ08;B1ATE0	Sgsh	Heparan N-sulfatase	tr|Q9EQ08|Q9EQ08_MOUSE Heparan N-sulfatase OS=Mus musculus OX=10090 GN=Sgsh PE=1 SV=1	5	8686700	5599300	406906	7635600	2065900	312961	1695200	486744	1710000	5250200	2829500	5385800	4488900	4843200	4294000	6202100	4800000	4053900	223377	4714400	516736	3390300	3047100	2750100	4218800	2846600	377153	2053600	218026	218254	458622	352503
Q9JHI0	Q9JHI0;Q3UW97	Mmp19	Matrix metalloproteinase-19	sp|Q9JHI0|MMP19_MOUSE Matrix metalloproteinase-19 OS=Mus musculus OX=10090 GN=Mmp19 PE=2 SV=1	5	591246	598482	406906	505140	3949700	312961	447227	5811100	5094500	318575	409407	455300	3264200	170466	190592	579184	3458600	5555000	223377	331010	3121600	218384	283782	228502	3221100	243892	3426000	264280	3750600	218254	458622	3425000
Q9JI91	Q9JI91;O88990	Actn2;Actn3	Alpha-actinin-2;Alpha-actinin-3	sp|Q9JI91|ACTN2_MOUSE Alpha-actinin-2 OS=Mus musculus OX=10090 GN=Actn2 PE=1 SV=2;sp|O88990|ACTN3_MOUSE Alpha-actinin-3 OS=Mus musculus OX=10090 GN=Actn3 PE=2 SV=1	1	591246	598482	406906	505140	298806	312961	447227	486744	519823	318575	409407	455300	345618	170466	190592	579184	317536	276250	223377	331010	516736	218384	283782	228502	328108	243892	377153	264280	218026	218254	458622	352503
Q9JKR6	Q9JKR6	Hyou1	Hypoxia up-regulated protein 1	sp|Q9JKR6|HYOU1_MOUSE Hypoxia up-regulated protein 1 OS=Mus musculus OX=10090 GN=Hyou1 PE=1 SV=1	2	624510	390820	407210	698040	1021200	596080	449880	571310	537130	377590	405840	337530	508290	631750	503220	579184	317536	447850	480500	570170	500410	422980	493830	228502	718780	332310	676420	382180	218026	571180	417530	707670
Q9QXF8	Q9QXF8	Gnmt	Glycine N-methyltransferase	sp|Q9QXF8|GNMT_MOUSE Glycine N-methyltransferase OS=Mus musculus OX=10090 GN=Gnmt PE=1 SV=3	7	18003000	3330000	6682400	2541900	1723000	1797900	447227	486744	519823	2913800	1725800	23142000	758590	1491500	702250	2354800	317536	276250	223377	331010	516736	218384	283782	228502	328108	1253000	903570	9760600	218026	218254	458622	352503
Q9QZU9	Q9QZU9	Ube2l6	Ubiquitin/ISG15-conjugating enzyme E2 L6	sp|Q9QZU9|UB2L6_MOUSE Ubiquitin/ISG15-conjugating enzyme E2 L6 OS=Mus musculus OX=10090 GN=Ube2l6 PE=1 SV=3	1	591246	598482	406906	505140	298806	312961	447227	486744	519823	318575	409407	455300	345618	170466	190592	579184	317536	276250	223377	331010	516736	218384	283782	228502	328108	243892	377153	264280	218026	218254	458622	352503
Q9R0Y5	Q9R0Y5;Q9R0Y5-2;Z4YN97;A0A0A6YXW8	Ak1	Adenylate kinase isoenzyme 1	sp|Q9R0Y5|KAD1_MOUSE Adenylate kinase isoenzyme 1 OS=Mus musculus OX=10090 GN=Ak1 PE=1 SV=1;sp|Q9R0Y5-2|KAD1_MOUSE Isoform 2 of Adenylate kinase isoenzyme 1 OS=Mus musculus OX=10090 GN=Ak1;tr|Z4YN97|Z4YN97_MOUSE Nucleoside-diphosphate kinase (Fragment) OS=	4	4663500	598482	5087300	2282100	2378600	3756600	447227	486744	1360900	318575	4634400	6375300	4152000	5362400	3252400	6416400	4348000	276250	3843300	2264500	516736	6584400	1720900	5783700	328108	743070	3967200	3538600	4131300	5224100	2138700	352503
Q9R100	Q9R100;A2AKS7	Cdh17	Cadherin-17	sp|Q9R100|CAD17_MOUSE Cadherin-17 OS=Mus musculus OX=10090 GN=Cdh17 PE=1 SV=1;tr|A2AKS7|A2AKS7_MOUSE Cadherin-17 OS=Mus musculus OX=10090 GN=Cdh17 PE=1 SV=1	4	4796800	3280600	3363000	2856900	2995100	4664300	3643900	2505900	519823	2741600	4602700	455300	3070900	3198600	2677600	4004200	3453900	276250	223377	331010	2776700	3091000	283782	228502	328108	243892	377153	264280	218026	2729500	2646500	352503
Q9WTR5	Q9WTR5	Cdh13	Cadherin-13	sp|Q9WTR5|CAD13_MOUSE Cadherin-13 OS=Mus musculus OX=10090 GN=Cdh13 PE=1 SV=2	2	3033300	1726800	2203500	1704200	2141600	3564500	2194900	1659500	1521500	1686200	2354300	1822000	345618	2530000	2150700	2635500	1050200	1867500	1608200	2194000	1787500	218384	1727200	1839000	1479700	1974200	1888600	1345600	1801500	2057400	1644200	2046500
Q9WVA4	Q9WVA4;Q9R1Q8	Tagln2;Tagln3	Transgelin-2;Transgelin-3	sp|Q9WVA4|TAGL2_MOUSE Transgelin-2 OS=Mus musculus OX=10090 GN=Tagln2 PE=1 SV=4;sp|Q9R1Q8|TAGL3_MOUSE Transgelin-3 OS=Mus musculus OX=10090 GN=Tagln3 PE=1 SV=1	2	591246	598482	4233800	2182400	298806	1265600	3001500	1779400	519823	318575	4174000	455300	345618	170466	1845100	2001100	317536	276250	2510600	331010	1493000	2873900	2079500	228502	328108	243892	377153	264280	2404200	3054500	458622	1558700
Q9Z0K8	Q9Z0K8	Vnn1	Pantetheinase	sp|Q9Z0K8|VNN1_MOUSE Pantetheinase OS=Mus musculus OX=10090 GN=Vnn1 PE=1 SV=3	10	591246	23874000	8196500	13776000	8916500	1021500	9100400	3941500	6349200	13404000	7771900	12384000	11924000	15464000	5578900	579184	23808000	28388000	15883000	17410000	5632900	11151000	1366400	1244000	2236500	243892	4248200	264280	7521000	3743300	6698000	6344500
Q9Z121	Q9Z121	Ccl8	C-C motif chemokine 8	sp|Q9Z121|CCL8_MOUSE C-C motif chemokine 8 OS=Mus musculus OX=10090 GN=Ccl8 PE=3 SV=1	3	2977000	2708500	406906	505140	6827900	3107100	447227	1872000	519823	318575	409407	455300	345618	170466	190592	579184	3226500	3299600	1583500	3116500	516736	2561500	4289000	228502	5968900	4505900	377153	264280	218026	218254	458622	352503
Q9Z1R9	Q9Z1R9	Prss1	Protease, serine 1 (trypsin 1)	tr|Q9Z1R9|Q9Z1R9_MOUSE Protease, serine 1 (trypsin 1) OS=Mus musculus OX=10090 GN=Prss1 PE=1 SV=1	1	4255000000	5644300000	5475100000	4426200000	298806	312961	447227	3878700000	519823	5028800000	409407	4246300000	345618	5795600000	4782900000	3949000000	317536	276250	3533200000	4347900000	516736	5389800000	3925500000	228502	328108	3242200000	377153	3347700000	3609500000	4099100000	458622	352503
S4R257	S4R257;S4R1W1;A0A0A0MQF6;P16858;A0A1D5RLD8;A0A0R4J0X7;S4R2G5;Q64467	Gapdh;Gm3839	Glyceraldehyde-3-phosphate dehydrogenase	tr|S4R257|S4R257_MOUSE Glyceraldehyde-3-phosphate dehydrogenase (Fragment) OS=Mus musculus OX=10090 GN=Gapdh PE=1 SV=1;tr|S4R1W1|S4R1W1_MOUSE Glyceraldehyde-3-phosphate dehydrogenase OS=Mus musculus OX=10090 GN=Gm3839 PE=1 SV=1;tr|A0A0A0MQF6|A0A0A0MQF6_MOU	4	8308400	598482	5071200	2643000	4865200	7688100	5026100	4075800	519823	318575	4242900	9408400	8269400	3133600	190592	9743900	6168200	3286600	2683200	3607600	516736	5130200	5313300	8371800	4615800	4688800	2898200	6493500	2526600	3909000	458622	352503
S4R2M7	S4R2M7;P09411	Pgk1	Phosphoglycerate kinase;Phosphoglycerate kinase 1	tr|S4R2M7|S4R2M7_MOUSE Phosphoglycerate kinase OS=Mus musculus OX=10090 GN=Pgk1 PE=1 SV=1;sp|P09411|PGK1_MOUSE Phosphoglycerate kinase 1 OS=Mus musculus OX=10090 GN=Pgk1 PE=1 SV=4	2	4505600	3298400	6392400	3346100	2728800	7290000	4552600	3412000	2620700	318575	6407400	7586400	345618	4266800	4935200	5121500	4599700	276250	3465300	331010	3305800	5615600	283782	3555700	328108	243892	4076200	4367200	218026	5382000	458622	352503
S4R2U9	S4R2U9;S4R189;Q3UPH7-3;Q3UPH7-6;Q3UPH7-2;Q3UPH7	Arhgef40	Rho guanine nucleotide exchange factor 40	tr|S4R2U9|S4R2U9_MOUSE Rho guanine nucleotide exchange factor 40 OS=Mus musculus OX=10090 GN=Arhgef40 PE=1 SV=1;tr|S4R189|S4R189_MOUSE Rho guanine nucleotide exchange factor 40 OS=Mus musculus OX=10090 GN=Arhgef40 PE=1 SV=1;sp|Q3UPH7-3|ARH40_MOUSE Isoform	1	8442200	6624300	6471300	5875100	8448400	9562600	7229400	3628900	8696100	5039900	7681200	9401600	7324200	7777800	8696100	8039200	317536	276250	2755300	4013100	4739400	5032600	283782	5022100	2693400	2452100	3343200	1929300	5767100	4836800	4417100	4096600
Z4YK03	Z4YK03;Q9D154	Serpinb1a	Leukocyte elastase inhibitor A	tr|Z4YK03|Z4YK03_MOUSE Leukocyte elastase inhibitor A (Fragment) OS=Mus musculus OX=10090 GN=Serpinb1a PE=1 SV=2;sp|Q9D154|ILEUA_MOUSE Leukocyte elastase inhibitor A OS=Mus musculus OX=10090 GN=Serpinb1a PE=1 SV=1	1	3011500	2660400	4831200	2462700	3455400	312961	447227	486744	519823	318575	2514800	1437600	2574900	170466	190592	579184	317536	3129100	1978900	2150000	1373400	2936300	2333700	1641300	328108	243892	377153	264280	2038400	218254	458622	352503
