# Supplementary material for: Integrated liver and serum proteomics uncover sexual dimorphism and alteration of several immune response proteins in an aging Werner syndrome mouse model
Source: Aging (Albany NY). 2024 May 24;16(10):8417–45. doi: 10.18632/aging.205866 (PMC11164518; doi:10.18632/aging.205866)
Supplement: Supplementary Table 8 [file aging-16-205866-s009.xls]

## Sheet: Column header
Column header	Description
ACCESSION	UniProt accession number for the leading protein of the group
PROTEIN_NAMES	Protein names for the group
GENE_NAMES	Gene names for the proteins of the group
FASTA_HEADERS	Fasta description for the group
FWrn10m_2868	LFQ intensities, normalized and imputed.
FWrn10m_2869
FWrn10m_2870
FWrn10m_2871
FWrn4m_3065
FWrn4m_3066
FWrn4m_3082
FWrn4m_3083
FWT10m_2854
FWT10m_2856
FWT10m_2882
FWT10m_2883
FWT4m_3002
FWT4m_3003
FWT4m_3021
FWT4m_3022
MWrn10m_2970
MWrn10m_2971
MWrn10m_2972
MWrn10m_2973
MWrn4m_3026
MWrn4m_3029
MWrn4m_3123
MWrn4m_3124
MWT10m_3048
MWT10m_3049
MWT10m_3051
MWT10m_3052
MWT4m_3000
MWT4m_3001
MWT4m_3014
MWT4m_3017
mean_g1	Mean of intensities for group g1 (all females)
mean_g2	Mean of intensities for group g2 (all males)
Ratio_g1g2	Ratio is computed as mean of group g1 / mean of group g2
log2Ratio	Log2 of the ratio between group g1 and group g2
Foldchange	The fold change is computed as ratio when ratio >0 or 1/ratio when ratio <0
Log2Foldchange	Log2 of the fold change between group g1 and group g2
zscore	zscore = x - µ / σ, where x = log2(ratio), µ = average of all log2(ratio) et σ = standard deviation of all log2(ratio)
pval_Limma	p-value from Limma

## Sheet: Supplementary Table 8
Supplementary Table 8. List of proteins in the serum significantly different between females and males.
Accession	ProteinNames	GeneNames	FastaHeaders	FWrn10m_2868	FWrn10m_2869	FWrn10m_2870	FWrn10m_2871	FWrn4m_3065	FWrn4m_3066	FWrn4m_3082	FWrn4m_3083	FWT10m_2854	FWT10m_2856	FWT10m_2882	FWT10m_2883	FWT4m_3002	FWT4m_3003	FWT4m_3021	FWT4m_3022	MWrn10m_2970	MWrn10m_2971	MWrn10m_2972	MWrn10m_2973	MWrn4m_3026	MWrn4m_3029	MWrn4m_3123	MWrn4m_3124	MWT10m_3048	MWT10m_3049	MWT10m_3051	MWT10m_3052	MWT4m_3000	MWT4m_3001	MWT4m_3014	MWT4m_3017	mean_g1 FEMALE	mean_g2 MALE	Ratio_g1_g2 FEM_MAL	log2Ratio FEM_MAL	zscore FEM_MAL	pval_Limma FEM_MAL
Q5FW60	Major urinary protein 20	Mup20	sp|Q5FW60|MUP20_MOUSE Major urinary protein 20 OS=Mus musculus OX=10090 GN=Mup20 PE=1 SV=1	591246	598482	406906	505140	298806	312961	447227	486744	519823	318575	409407	455300	345618	170466	190592	579184	24819000	20259000	31536000	22642000	29129000	24026000	40761000	30347000	36056000	18396000	33950000	42332000	35877000	27395000	19345000	22724000	414780	28724625	0.0144399	-6.1138	-5.80559	3.28107e-28
Q00898	Alpha-1-antitrypsin 1-5	Serpina1e	sp|Q00898|A1AT5_MOUSE Alpha-1-antitrypsin 1-5 OS=Mus musculus OX=10090 GN=Serpina1e PE=1 SV=1	410110000	27184000	55185000	57187000	639010000	4419500000	122940000	331640000	70505000	32390000	94911000	84230000	224720000	100210000	868010000	6368000000	3920900000	2521400000	3755000000	3615000000	11815000000	4571900000	15270000000	10927000000	20165000000	19124000000	12870000000	18786000000	10901000000	10975000000	9369200000	8148200000	869108250	10420912500	0.0834004	-3.5838	-3.53158	3.84189e-10
P21765	Epididymal secretory glutathione peroxidase	Gpx5	sp|P21765|GPX5_MOUSE Epididymal secretory glutathione peroxidase OS=Mus musculus OX=10090 GN=Gpx5 PE=2 SV=3	591246	598482	406906	505140	298806	312961	447227	486744	519823	318575	409407	455300	345618	170466	190592	579184	4423700	3047200	2344200	4841500	6437300	3985900	3425500	4141800	1969800	3332200	4739100	1545300	4070900	5922600	6089100	2390000	414780	3.91913e+06	0.105835	-3.24012	-3.22267	4.26377e-17
D3YXF5	Complement component 7	C7	tr|D3YXF5|D3YXF5_MOUSE Complement component 7 OS=Mus musculus OX=10090 GN=C7 PE=1 SV=2	76216000	60258000	66512000	61220000	56611000	80305000	65331000	54212000	67201000	50656000	66410000	57090000	69806000	67918000	55137000	93105000	493150000	438300000	388930000	434570000	673740000	555700000	415040000	351420000	327350000	394980000	497040000	311920000	579900000	553400000	593260000	624300000	65499250	477062500	0.137297	-2.86463	-2.88517	9.72674e-24
Q3KQQ2	Major urinary protein 3	Mup3	tr|Q3KQQ2|Q3KQQ2_MOUSE Major urinary protein 25 OS=Mus musculus OX=10090 GN=Mup3 PE=1 SV=1;sp|P04939|MUP3_MOUSE Major urinary protein 3 OS=Mus musculus OX=10090 GN=Mup3 PE=1 SV=1	11741000	25624000	30717000	19816000	34220000	7047200	23810000	22673000	33066000	27878000	28074000	20992000	47694000	19377000	32295000	11208000	146960000	105360000	121850000	118640000	198810000	148330000	161100000	140110000	146240000	36595000	155280000	96930000	184440000	129740000	106820000	104870000	2.47645e+07	1.3138e+08	0.188496	-2.4074	-2.47421	9.80052e-13
Q91X70	Complement component 6	C6	tr|Q91X70|Q91X70_MOUSE Complement component 6 OS=Mus musculus OX=10090 GN=C6 PE=1 SV=1;tr|E9Q6D8|E9Q6D8_MOUSE Complement component C6 OS=Mus musculus OX=10090 GN=C6 PE=1 SV=2	49214000	36527000	34035000	30765000	30781000	40960000	29424000	26345000	24240000	29660000	38431000	18976000	37379000	45985000	31525000	36974000	110920000	98384000	105130000	104730000	207980000	119710000	241370000	145700000	202200000	154760000	198660000	208710000	219560000	168040000	154860000	160590000	3.38263e+07	162581500	0.208058	-2.26495	-2.34617	3.80653e-17
A2CEK7	Major urinary protein 14	Mup14	tr|A2CEK7|A2CEK7_MOUSE Major urinary protein 12 OS=Mus musculus OX=10090 GN=Mup14 PE=3 SV=1	27394000	75468000	67429000	56598000	168060000	25279000	85545000	69241000	81789000	72443000	75232000	69251000	103540000	96921000	72840000	16068000	194730000	147550000	165700000	184960000	333450000	240180000	435470000	335040000	497020000	39930000	395340000	382820000	385560000	203410000	175500000	249460000	72693625	272882500	0.266392	-1.90838	-2.02568	3.01918e-07
Q91YI0	Argininosuccinate lyase	Asl	sp|Q91YI0|ARLY_MOUSE Argininosuccinate lyase OS=Mus musculus OX=10090 GN=Asl PE=1 SV=1;tr|E0CY49|E0CY49_MOUSE Argininosuccinate lyase (Fragment) OS=Mus musculus OX=10090 GN=Asl PE=1 SV=1	29605000	4454600	16124000	1878400	1396300	1460200	863740	1130700	1119000	1749300	1335900	9716300	587620	1015600	975020	1828400	320700	954790	487050	506850	617390	478490	319990	382610	328108	699370	462710	1377900	501240	886810	458622	681980	4702505	591538	7.94962	2.99089	2.37787	3.89688e-05
Q6GQT1	Alpha-2-macroglobulin-P	A2mp	sp|Q6GQT1|A2MG_MOUSE Alpha-2-macroglobulin-P OS=Mus musculus OX=10090 GN=A2m PE=2 SV=2	13406000	122310000	34378000	7027700	72463000	18114000	126390000	56634000	63854000	8827300	99332000	58945000	57226000	102750000	67705000	16023000	1145700	1930600	925830	587190	3169700	1329900	2074800	1731900	974340	1050300	1065200	950190	2739300	2673900	1760000	1568200	5.78366e+07	1.60482e+06	36.0394	5.1715	4.33785	1.86192e-14
Q02596	Glycosylation-dependent cell adhesion molecule 1	Glycam1	sp|Q02596|GLCM1_MOUSE Glycosylation-dependent cell adhesion molecule 1 OS=Mus musculus OX=10090 GN=Glycam1 PE=1 SV=1;tr|B7ZNZ9|B7ZNZ9_MOUSE Glycosylation-dependent cell adhesion molecule 1 OS=Mus musculus OX=10090 GN=Glycam1 PE=1 SV=1;tr|A0A2I3BPT0|A0A2I3B	36363000	32698000	36091000	37936000	47382000	53310000	38970000	23642000	24946000	25002000	34798000	22630000	36222000	31321000	23563000	28725000	1297700	1798100	765210	540610	516736	670670	1004400	1513200	328108	511160	377153	435190	1367800	943200	443660	352503	3.33499e+07	804088	41.4755	5.37419	4.52002	4.85594e-23
Q19LI2	Alpha-1B-glycoprotein	A1bg	sp|Q19LI2|A1BG_MOUSE Alpha-1B-glycoprotein OS=Mus musculus OX=10090 GN=A1bg PE=1 SV=1	13964000000	4861400000	5045700000	5996600000	1072400000	5242300000	596680000	2000700000	5500500000	11992000000	403110000	4299500000	1500900000	1052300000	263950000	7866600000	175830	17029	59620	222850	8563.9	94988	15663	637630	23534	243892	377153	12452	218026	10474	458622	352503	4478665000	183052	24466.6	14.5785	12.7931	5.04211e-21
