# Supplementary material for: Integrated liver and serum proteomics uncover sexual dimorphism and alteration of several immune response proteins in an aging Werner syndrome mouse model
Source: Aging (Albany NY). 2024 May 24;16(10):8417–45. doi: 10.18632/aging.205866 (PMC11164518; doi:10.18632/aging.205866)
Supplement: Supplementary Table 9 [file aging-16-205866-s010.xls]

## Sheet: Column header
Supplementary Table 9. List of quantified serum proteins significantly different in at least one of the comparisons between the various female groups.
Column header	Description
Accession	UniProt accession number of the leading razor protein
Protein.names	Protein name
Gene.names	Gene name
Razor...unique.peptides	Number of unique and razor peptides
FWrn10m_2868	LFQ intensities, normalized and imputed.
FWrn10m_2869
FWrn10m_2870
FWrn10m_2871
FWrn4m_3065
FWrn4m_3066
FWrn4m_3082
FWrn4m_3083
FWT10m_2854
FWT10m_2856
FWT10m_2882
FWT10m_2883
FWT4m_3002
FWT4m_3003
FWT4m_3021
FWT4m_3022
mean_g1	Mean of intensities for group g1
mean_g2	Mean of intensities for group g2
Ratio_g1g2	Ratio is computed as mean of group g1 / mean of group g2
log2Ratio	Log2 of the ratio between group g1 and group g2
Foldchange	The fold change is computed as ratio when ratio >0 or 1/ratio when ratio <0
Log2Foldchange	Log2 of the fold change between group g1 and group g2
zscore	zscore = x - µ / σ, where x = log2(ratio), µ = average of all log2(ratio) et σ = standard deviation of all log2(ratio)
pval_Limma	p-value from Limma
qval_Limma	Benjamini-Hochberg adjusted p-value from Limma
Sign_zscore_qval_Limma	A protein is considered as significantly regulated if :|zscore| > 1.96 & Limma q-value < 0.05 If 'Up', the protein is more abudant in group g1 than in group g2 If 'Down' the protein is more abundant in group g1 than in group g2
Replacement of missing values: Missing values ​are replaced with a noise value corresponding to the 1st percentile of the values ​for each column (Red colored LFQ values in the table)

## Sheet: Quantified proteins in females
																				FWrn 10 m / FWT 10 m						FWrn 4m / FWT 4 m						FWT 4 m / FWT 10 m						FWrn 4 m / FWrn 10 m						FWrn 4 m / FWT 10 m
Accession	ProteinNames	GeneNames	RazorUniquePeptides	FWrn10m_2868	FWrn10m_2869	FWrn10m_2870	FWrn10m_2871	FWrn4m_3065	FWrn4m_3066	FWrn4m_3082	FWrn4m_3083	FWT10m_2854	FWT10m_2856	FWT10m_2882	FWT10m_2883	FWT4m_3002	FWT4m_3003	FWT4m_3021	FWT4m_3022	mean_g1 FWrn10m_FWT10m	mean_g2 FWrn10m_FWT10m	Ratio_g1_g2 FWrn10m_FWT10m	log2Ratio FWrn10m_FWT10m	zscore FWrn10m_FWT10m	pval_Limma FWrn10m_FWT10m	mean_g1 FWrn4m_FWT4m	mean_g2 FWrn4m_FWT4m	Ratio_g1_g2 FWrn4m_FWT4m	log2Ratio FWrn4m_FWT4m	zscore FWrn4m_FWT4m	pval_Limma FWrn4m_FWT4m	mean_g1 FWT4m_FWT10m	mean_g2 FWT4m_FWT10m	Ratio_g1_g2 FWT4m_FWT10m	log2Ratio FWT4m_FWT10m	zscore FWT4m_FWT10m	pval_Limma FWT4m_FWT10m	mean_g1 FWrn4m_FWrn10m	mean_g2 FWrn4m_FWrn10m	Ratio_g1_g2 FWrn4m_FWrn10m	log2Ratio FWrn4m_FWrn10m	zscore FWrn4m_FWrn10m	pval_Limma FWrn4m_FWrn10m	mean_g1 FWrn4m_FWT10m	mean_g2 FWrn4m_FWT10m	Ratio_g1_g2 FWrn4m_FWT10m	log2Ratio FWrn4m_FWT10m	zscore FWrn4m_FWT10m	pval_Limma FWrn4m_FWT10m
E9Q414	Apolipoprotein B-100;Apolipoprotein B-48	Apob	194	293150000	277190000	226290000	178290000	361440000	366260000	224100000	173020000	228960000	271780000	208850000	111380000	247870000	326950000	211490000	386340000	243730000	205242500	1.18752	0.247954	0.067418	0.370303	281205000	293162500	0.959212	-0.0600783	-0.191483	0.775104	293162500	205242500	1.42837	0.514371	0.558633	0.128704	281205000	243730000	1.15376	0.206338	0.549684	0.602877	281205000	205242500	1.37011	0.454293	0.579914	0.24238
P01027	Complement C3;Complement C3 beta chain;C3-beta-c;Complement C3 alpha chain;C3a anaphylatoxin;Acylation stimulating protein;Complement C3b alpha chain;Complement C3c alpha chain fragment 1;Complement C3dg fragment;Complement C3g fragment;Complement C3d fragment;Complement C3f fragment;Complement C3c alpha chain fragment 2	C3	112	5266400000	6487000000	3798500000	4338600000	8181800000	5194600000	7337700000	6922100000	6758900000	5024700000	5709000000	5262300000	8414200000	8292000000	7518800000	7590500000	4972625000	5688725000	0.874119	-0.194098	-0.585601	0.331654	6909050000	7953875000	0.868639	-0.203171	-0.405576	0.251932	7953875000	5688725000	1.39818	0.483553	0.527481	0.0105689	6909050000	4972625000	1.38942	0.47448	0.905316	0.067332	6909050000	5688725000	1.21452	0.280382	0.323335	0.207466
A0A571BF69	Maltase-glucoamylase	Mgam	96	259790000	228870000	283930000	231580000	194500000	200270000	234310000	150670000	234930000	232620000	216950000	183650000	236160000	260190000	152590000	190390000	251042500	217037500	1.15668	0.209987	0.0113314	0.205401	194937500	209832500	0.929015	-0.106227	-0.260529	0.686989	209832500	217037500	0.966803	-0.0487062	-0.0105515	0.733762	194937500	251042500	0.776512	-0.36492	-0.207969	0.0763247	194937500	217037500	0.898174	-0.154933	-0.318905	0.405274
Q61838	Alpha-2-macroglobulin;Alpha-2-macroglobulin 165 kDa subunit;Alpha-2-macroglobulin 35 kDa subunit	A2m	94	24763000000	21591000000	22562000000	18900000000	20446000000	24448000000	20284000000	16213000000	21375000000	19362000000	20523000000	17879000000	23713000000	22097000000	17957000000	21344000000	21954000000	19784750000	1.10964	0.150095	-0.0771442	0.346292	20347750000	21277750000	0.956292	-0.0644763	-0.198063	0.699209	21277750000	19784750000	1.07546	0.104957	0.144778	0.509829	20347750000	21954000000	0.926836	-0.109615	0.13064	0.536393	20347750000	19784750000	1.02846	0.0404804	-0.0306029	0.874672
A0A087WSN6	Fibronectin;Anastellin	Fn1	93	1176800000	1242500000	679010000	1035600000	1139700000	425500000	1671900000	1326700000	1275300000	2028000000	67812000	57386000	670450000	458930000	583130000	221540000	1033477500	857124500	1.20575	0.26993	0.0998819	0.210539	1140950000	483512500	2.35971	1.23861	1.7516	0.0433734	483512500	857124500	0.56411	-0.825952	-0.796227	0.70133	1140950000	1033477500	1.10399	0.142729	0.465319	0.970688	1140950000	857124500	1.33114	0.412659	0.51849	0.2145
P28665	Murinoglobulin-1	Mug1	80	2485100000	3258700000	3525100000	2137800000	4800600000	2501000000	3727600000	3271700000	3319400000	1777400000	3878500000	2722200000	3847300000	3379600000	3881300000	1902100000	2851675000	2924375000	0.97514	-0.0363188	-0.352523	0.980095	3575225000	3252575000	1.0992	0.136452	0.102564	0.621791	3252575000	2924375000	1.11223	0.153454	0.193802	0.644305	3575225000	2851675000	1.25373	0.326224	0.708687	0.255349	3575225000	2924375000	1.22256	0.289906	0.337386	0.337385
P06684	Complement C5;Complement C5 beta chain;Complement C5 alpha chain;C5a anaphylatoxin;Complement C5 alpha chain	C5	78	573640000	576910000	563320000	409050000	542760000	502120000	439210000	413700000	434570000	377990000	454390000	381820000	480040000	455150000	448860000	467010000	530730000	412192500	1.28758	0.36466	0.239821	0.0705465	474447500	462765000	1.02524	0.0359687	-0.0477779	0.855944	462765000	412192500	1.12269	0.166961	0.207456	0.227397	474447500	530730000	0.893953	-0.16173	0.0615199	0.424474	474447500	412192500	1.15103	0.20293	0.209067	0.257586
P01029	Complement C4-B;Complement C4 beta chain;Complement C4 alpha chain;C4a anaphylatoxin;Complement C4 gamma chain	C4b	76	587200000	636430000	529070000	417710000	521820000	408240000	628060000	423450000	455100000	495440000	395470000	282770000	892860000	799340000	485640000	383850000	542602500	407195000	1.33254	0.414176	0.312968	0.0992643	495392500	640422500	0.77354	-0.370452	-0.655861	0.342674	640422500	407195000	1.57277	0.653304	0.699073	0.0998255	495392500	542602500	0.912993	-0.131324	0.101847	0.542648	495392500	407195000	1.2166	0.282852	0.32698	0.256446
E9Q8I0	Complement factor H	Cfh	60	1560300000	1778100000	1349200000	1051500000	1944300000	1515600000	1340200000	1526500000	1671700000	1173900000	1464800000	1139300000	1756300000	1789500000	1691900000	1488800000	1434775000	1362425000	1.0531	0.0746477	-0.188598	0.770212	1581650000	1681625000	0.940549	-0.0884256	-0.233896	0.574879	1681625000	1362425000	1.23429	0.303679	0.345656	0.102426	1581650000	1434775000	1.10237	0.140606	0.462504	0.495052	1581650000	1362425000	1.16091	0.215254	0.227248	0.303644
B8JJN0	Complement factor B;Complement factor B Ba fragment;Complement factor B Bb fragment	Cfb	57	828160000	1202100000	621620000	705770000	1119800000	840940000	948590000	844340000	1026900000	799630000	1010300000	709700000	1206300000	1130800000	933740000	907250000	839412500	886632500	0.946742	-0.0789563	-0.415509	0.673074	938417500	1044522500	0.898418	-0.154542	-0.332818	0.406143	1044522500	886632500	1.17808	0.236435	0.277683	0.227502	938417500	839412500	1.11795	0.16085	0.489353	0.428184	938417500	886632500	1.05841	0.0818937	0.030496	0.656198
Q6GQT1	Alpha-2-macroglobulin-P	A2mp	57	18341000	103980000	34937000	11254000	70132000	22227000	113030000	57785000	59317000	12573000	91325000	55018000	54888000	94156000	64161000	19837000	42128000	54558250	0.772166	-0.373018	-0.84991	0.506296	65793500	58260500	1.1293	0.175427	0.160878	0.800289	58260500	54558250	1.06786	0.0947207	0.134431	0.780216	65793500	42128000	1.56175	0.643166	1.12904	0.238301	65793500	54558250	1.20593	0.270148	0.308236	0.622066
O88783	Coagulation factor V;Coagulation factor V heavy chain;Coagulation factor V light chain	F5	56	73289000	70413000	41534000	47331000	45083000	42536000	38790000	30186000	38625000	48656000	39050000	33449000	40476000	43858000	34371000	40105000	58141750	39945000	1.45555	0.54156	0.501145	0.0645241	39148750	39702500	0.986053	-0.0202636	-0.131912	0.867278	39702500	39945000	0.993929	-0.00878507	0.0298027	0.99465	39148750	58141750	0.673333	-0.570608	-0.48077	0.0572027	39148750	39945000	0.980066	-0.0290487	-0.133183	0.874797
G3X9T8	Ceruloplasmin	Cp	55	2548700000	2411000000	2408200000	1818300000	2143600000	1976000000	2056400000	1755100000	1886700000	2054800000	2232600000	1893400000	2058400000	2235900000	1859500000	1815900000	2296550000	2016875000	1.13867	0.187347	-0.0221145	0.299171	1982775000	1992425000	0.995157	-0.00700444	-0.112074	0.969635	1992425000	2016875000	0.987877	-0.0175963	0.0208959	0.894508	1982775000	2296550000	0.863371	-0.211947	-0.00508299	0.268522	1982775000	2016875000	0.983093	-0.0246007	-0.12662	0.872133
P20918	Plasminogen;Plasmin heavy chain A;Activation peptide;Angiostatin;Plasmin heavy chain A, short form;Plasmin light chain B	Plg	53	2975500000	2510800000	2619400000	2065700000	2544400000	2514900000	2523200000	2032600000	2652100000	2546400000	2331600000	1453800000	2456700000	2401500000	2182100000	2152800000	2542850000	2245975000	1.13218	0.179104	-0.03429	0.405867	2403775000	2298275000	1.0459	0.0647504	-0.00471489	0.695825	2298275000	2245975000	1.02329	0.0332096	0.0722528	0.756669	2403775000	2542850000	0.945307	-0.0811445	0.168399	0.680746	2403775000	2245975000	1.07026	0.09796	0.0541994	0.585651
Q9DBD0	Inhibitor of carbonic anhydrase	Ica	41	837020000	771900000	824510000	673490000	722960000	739500000	685490000	611990000	731230000	710990000	744740000	626760000	743240000	820250000	684010000	701080000	776730000	703430000	1.1042	0.143006	-0.0876159	0.351592	689985000	737145000	0.936023	-0.0953834	-0.244306	0.533428	737145000	703430000	1.04793	0.0675416	0.106957	0.633402	689985000	776730000	0.88832	-0.170848	0.0494261	0.307926	689985000	703430000	0.980887	-0.0278419	-0.131402	0.854484
E9PVD2	Inter alpha-trypsin inhibitor, heavy chain 4	Itih4	40	2279100000	2864800000	2097700000	1826700000	1547400000	1555100000	1610700000	1280200000	1474700000	1882400000	1790400000	1373400000	1697100000	1794600000	1302900000	1453100000	2267075000	1630225000	1.39065	0.475761	0.403944	0.0431958	1498350000	1561925000	0.959297	-0.0599505	-0.191291	0.757081	1561925000	1630225000	0.958104	-0.0617459	-0.0237326	0.73914	1498350000	2267075000	0.660918	-0.597457	-0.51638	0.0142973	1498350000	1630225000	0.919106	-0.121696	-0.26987	0.529098
E9PV24	Fibrinogen alpha chain;Fibrinopeptide A;Fibrinogen alpha chain	Fga	36	544040000	3512900000	15679000	486940000	5207600	10002000	409080000	1555600000	1936400000	3933500000	11696000	6816500	38741000	15437000	62660000	8740200	1139889750	1472103125	0.774327	-0.368984	-0.843952	0.667482	494972400	31394550	15.7662	3.97876	5.8514	0.384175	31394550	1472103125	0.0213263	-5.55122	-5.57275	0.252108	494972400	1139889750	0.434228	-1.20347	-1.32013	0.350008	494972400	1472103125	0.336235	-1.57246	-2.41025	0.710369
P19221	Prothrombin;Activation peptide fragment 1;Activation peptide fragment 2;Thrombin light chain;Thrombin heavy chain;Prothrombin	F2	36	1650300000	1703500000	1616400000	1348200000	1415900000	1296500000	1399800000	1145500000	1376100000	1427900000	1177000000	791160000	1425300000	1458900000	1309600000	1115000000	1579600000	1193040000	1.32401	0.404917	0.29929	0.0831867	1314425000	1327200000	0.990374	-0.013954	-0.122472	0.946011	1327200000	1193040000	1.11245	0.153743	0.194094	0.43253	1314425000	1579600000	0.832125	-0.265127	-0.0756152	0.136643	1314425000	1193040000	1.10174	0.139789	0.115912	0.464309
Q61702	Inter-alpha-trypsin inhibitor heavy chain H1	Itih1	36	1043800000	883300000	827450000	632110000	755000000	664970000	544260000	541150000	670560000	669210000	683880000	609680000	715210000	716480000	654470000	717560000	846665000	658332500	1.28608	0.362975	0.237331	0.0964894	626345000	700930000	0.893591	-0.162313	-0.344445	0.317903	700930000	658332500	1.06471	0.090454	0.130118	0.482263	626345000	846665000	0.739779	-0.434834	-0.300694	0.0769714	626345000	658332500	0.951411	-0.0718589	-0.196342	0.630173
Q8BND5	Sulfhydryl oxidase 1	Qsox1	35	268660000	312510000	228110000	229060000	311690000	239510000	241420000	181680000	204990000	253000000	282550000	179230000	284860000	340840000	215410000	214390000	259585000	229942500	1.12891	0.174934	-0.0404511	0.383011	243575000	263875000	0.92307	-0.115489	-0.274387	0.640321	263875000	229942500	1.14757	0.198582	0.239419	0.418276	243575000	259585000	0.938325	-0.091841	0.154212	0.631803	243575000	229942500	1.05929	0.0830929	0.0322653	0.738537
Q8VCU2	Phosphatidylinositol-glycan-specific phospholipase D	Gpld1	34	383600000	368760000	429200000	402520000	447420000	343180000	497160000	413540000	434050000	455220000	467080000	270260000	447840000	462850000	404250000	311830000	396020000	406652500	0.973854	-0.0382232	-0.355336	0.972503	425325000	406692500	1.04581	0.0646273	-0.00489916	0.73529	406692500	406652500	1.0001	0.000141902	0.0388265	0.943878	425325000	396020000	1.074	0.102992	0.412617	0.600796	425325000	406652500	1.04592	0.0647692	0.00523143	0.722408
Q80YQ1	Thrombospondin-1	Thbs1	33	21801000	6459000	54304000	30780000	41955000	43974000	13537000	10509000	20039000	897570	391560000	186900000	59324000	69043000	40124000	68209000	28336000	1.49849e+08	0.189097	-2.4028	-3.8484	0.744418	27493750	59175000	0.464618	-1.10588	-1.75621	0.0272144	59175000	1.49849e+08	0.394897	-1.34045	-1.31631	0.670289	27493750	28336000	0.970276	-0.0435324	0.218283	0.958599	27493750	1.49849e+08	0.183476	-2.44634	-3.69952	0.752281
Q8K0E8	Fibrinogen beta chain;Fibrinopeptide B;Fibrinogen beta chain	Fgb	33	872280000	6598300000	491620	845930000	33093	250150	844520000	2822500000	3268800000	7025200000	456769	530222	53213000	511980	44547000	138080	2079250405	2.57375e+09	0.807869	-0.307807	-0.753577	0.626309	9.16826e+08	24602515	37.2655	5.21977	7.70818	0.678583	24602515	2.57375e+09	0.00955903	-6.70892	-6.74301	0.364307	9.16826e+08	2079250405	0.440941	-1.18134	-1.29078	0.361442	9.16826e+08	2.57375e+09	0.356222	-1.48915	-2.28734	0.688293
P32261	Antithrombin-III	Serpinc1	33	3886900000	4456600000	4184000000	3804200000	3088600000	3072400000	3837500000	2623500000	3499600000	3877700000	2625800000	2335200000	3868100000	4016700000	2852700000	2816000000	4082925000	3084575000	1.32366	0.404531	0.298721	0.0612801	3155500000	3388375000	0.931272	-0.102725	-0.25529	0.641147	3388375000	3084575000	1.09849	0.135522	0.175675	0.535433	3155500000	4082925000	0.772853	-0.371734	-0.217007	0.0546411	3155500000	3084575000	1.02299	0.0327969	-0.0419388	0.827921
Q00623	Apolipoprotein A-I;Proapolipoprotein A-I;Truncated apolipoprotein A-I	Apoa1	33	26796000000	29945000000	29728000000	29228000000	34681000000	28055000000	34509000000	26052000000	25410000000	24469000000	30958000000	28133000000	38052000000	33378000000	31340000000	26328000000	28924250000	27242500000	1.06173	0.0864204	-0.171207	0.531981	30824250000	32274500000	0.955065	-0.066329	-0.200835	0.73061	32274500000	27242500000	1.18471	0.244536	0.285871	0.188187	30824250000	28924250000	1.06569	0.0917862	0.397755	0.631053	30824250000	27242500000	1.13148	0.178207	0.172591	0.347942
P13020	Gelsolin	Gsn	33	2757700000	2053800000	2310900000	1715600000	2000600000	2534800000	2314800000	1483200000	2022900000	1876300000	2316100000	1715900000	2199800000	2398200000	1823800000	2207800000	2209500000	1982800000	1.11433	0.156181	-0.068154	0.475152	2083350000	2157400000	0.965676	-0.0503885	-0.176985	0.736818	2157400000	1982800000	1.08806	0.121755	0.161758	0.45938	2083350000	2209500000	0.942906	-0.0848147	0.163531	0.702983	2083350000	1982800000	1.05071	0.0713661	0.0149641	0.814108
Q00897	Alpha-1-antitrypsin 1-4	Serpina1d	32	23075000000	20318000000	22788000000	19736000000	19790000000	19306000000	21829000000	16749000000	20607000000	18785000000	18900000000	18108000000	19658000000	20866000000	16505000000	17063000000	21479250000	19100000000	1.12457	0.169371	-0.0486688	0.242705	19418500000	18523000000	1.04835	0.068114	0.000317633	0.680516	18523000000	19100000000	0.969791	-0.0442549	-0.00605186	0.732937	19418500000	21479250000	0.904059	-0.145512	0.0830294	0.372486	19418500000	19100000000	1.01668	0.0238591	-0.0551251	0.903316
P21614	Vitamin D-binding protein	Gc	32	4008700000	4753800000	4288300000	3887500000	4371800000	3369200000	3921300000	3503300000	4001600000	4128200000	3703100000	2884800000	3746600000	4540200000	3996100000	3152700000	4234575000	3679425000	1.15088	0.202737	0.000620755	0.240023	3791400000	3858900000	0.982508	-0.025459	-0.139685	0.908455	3858900000	3679425000	1.04878	0.0687093	0.108138	0.710907	3791400000	4234575000	0.895344	-0.159487	0.064495	0.342954	3791400000	3679425000	1.03043	0.0432503	-0.0265163	0.793237
A0A0R4J0I1	Serine protease inhibitor A3K	Serpina3k	31	4007400000	4796800000	5804400000	3693400000	15304000000	7405500000	9574900000	11063000000	8500900000	4647800000	7957100000	7147700000	10709000000	10561000000	14189000000	8648600000	4575500000	7063375000	0.647778	-0.626428	-1.22426	0.0384893	10836850000	11026900000	0.982765	-0.0250818	-0.139121	0.845118	11026900000	7063375000	1.56114	0.642598	0.688251	0.0284848	10836850000	4575500000	2.36845	1.24394	1.92585	0.00152539	10836850000	7063375000	1.53423	0.617516	0.820725	0.0685422
Q19LI2	Alpha-1B-glycoprotein	A1bg	31	13551000000	4766500000	4960700000	5876100000	1067900000	5137600000	935790000	1992500000	5302400000	11831000000	645070000	4371500000	1495000000	1651300000	347890000	7687800000	7288575000	5537492500	1.31622	0.396404	0.286714	0.348211	2283447500	2795497500	0.81683	-0.291891	-0.538319	0.868807	2795497500	5537492500	0.504831	-0.986128	-0.958141	0.324831	2283447500	7288575000	0.313291	-1.67442	-1.94475	0.0116576	2283447500	5537492500	0.412361	-1.27802	-1.97585	0.297945
Q3UER8	Fibrinogen gamma chain	Fgg	31	1012100000	6108700000	2227800	971660000	228230	415732	847690000	2700800000	3519000000	8050500000	160510	159330	29321000	271860	114120000	397664	2023671950	2892454960	0.699638	-0.515319	-1.06012	0.44781	NA	NA	NA	NA	NA	NA	3.60276e+07	2892454960	0.0124557	-6.32705	-6.35699	0.540958	8.87283e+08	2023671950	0.438452	-1.18951	-1.30161	0.315748	8.87283e+08	2892454960	0.306758	-1.70483	-2.60554	0.931314
P23953	Carboxylesterase 1C	Ces1c	30	18324000000	15665000000	19282000000	13890000000	15497000000	18130000000	18095000000	12980000000	14653000000	13657000000	16474000000	14399000000	18136000000	16850000000	13571000000	16084000000	16790250000	14795750000	1.1348	0.182441	-0.0293614	0.308509	16175500000	16160250000	1.00094	0.00136079	-0.0995579	0.983179	16160250000	14795750000	1.09222	0.127267	0.16733	0.431626	16175500000	16790250000	0.963386	-0.0538134	0.204648	0.778691	16175500000	14795750000	1.09325	0.128627	0.0994446	0.510051
Q61129	Complement factor I;Complement factor I heavy chain;Complement factor I light chain	Cfi	30	1118200000	915400000	858280000	639010000	942740000	1037100000	783630000	698870000	839480000	693820000	777870000	593370000	920090000	880010000	762010000	932310000	882722500	726135000	1.21565	0.281722	0.117301	0.246569	865585000	873605000	0.99082	-0.0133056	-0.121502	0.888242	873605000	726135000	1.20309	0.266743	0.30832	0.12778	865585000	882722500	0.980586	-0.0282845	0.238507	0.941196	865585000	726135000	1.19204	0.253438	0.283583	0.242536
Q07968	Coagulation factor XIII B chain	F13b	29	142900000	115630000	132220000	109010000	152060000	151740000	157010000	121880000	156010000	129200000	128910000	109250000	184700000	167430000	156790000	152800000	124940000	130842500	0.954889	-0.0665958	-0.39725	0.718087	145672500	165430000	0.880569	-0.183492	-0.376134	0.265018	165430000	130842500	1.26434	0.33839	0.380743	0.0598948	145672500	124940000	1.16594	0.221493	0.569783	0.225234	145672500	130842500	1.11334	0.154897	0.138202	0.392184
P07724	Serum albumin	Alb	29	15071000	4731300	15395000	8491400	6466100	3721600	3441100	1869700	11212000	5607800	595850000	15044000	11824000	32265000	8751000	20733000	10922175	156928450	0.0695997	-3.84477	-5.97855	0.318563	3874625	18393250	0.210655	-2.24705	-3.46361	0.00202129	18393250	156928450	0.117208	-3.09286	-3.08772	0.600585	3874625	10922175	0.354748	-1.49513	-1.70695	0.0154671	3874625	156928450	0.0246904	-5.33991	-7.96855	0.0612409
Q8BH61	Coagulation factor XIII A chain	F13a1	29	147830000	148310000	119530000	124060000	137700000	119930000	210400000	158360000	216390000	186380000	32670000	41220000	223820000	153860000	163850000	114280000	134932500	119165000	1.13232	0.179277	-0.0340347	0.347345	156597500	163952500	0.955139	-0.0662167	-0.200667	0.831116	163952500	119165000	1.37584	0.460317	0.503993	0.215621	156597500	134932500	1.16056	0.214823	0.560937	0.395264	156597500	119165000	1.31412	0.394101	0.49111	0.235584
O89020	Afamin	Afm	29	2581400000	1847000000	1857400000	1813000000	1871900000	2061000000	1707400000	1535200000	1829300000	1740700000	1521800000	1281200000	1866700000	1789300000	1566600000	1877200000	2024700000	1593250000	1.2708	0.345735	0.211865	0.109348	1793875000	1774950000	1.01066	0.015301	-0.0787007	0.948871	1774950000	1593250000	1.11404	0.155806	0.196179	0.338882	1793875000	2024700000	0.885995	-0.174629	0.044412	0.397399	1793875000	1593250000	1.12592	0.171107	0.162116	0.365051
Q91X72	Hemopexin	Hpx	29	10951000000	10554000000	8900100000	5945800000	8308700000	10918000000	7467900000	7187800000	6885700000	6932200000	8554700000	5816800000	9475400000	9569200000	8197300000	9416800000	9087725000	7047350000	1.28952	0.366838	0.243039	0.18789	8470600000	9164675000	0.924266	-0.11362	-0.271591	0.485367	9164675000	7047350000	1.30044	0.379003	0.421797	0.0414407	8470600000	9087725000	0.932092	-0.101455	0.141461	0.747935	8470600000	7047350000	1.20196	0.265383	0.301207	0.237806
A0A0R4J038	Kininogen-1;Kininogen-1 heavy chain;Bradykinin;Kininogen-1 light chain	Kng1	29	4380900000	4087600000	3707700000	3792200000	3679000000	4541100000	3916100000	3124400000	4174900000	3980300000	3911000000	2907800000	4149100000	4325700000	3683500000	4134300000	3992100000	3743500000	1.06641	0.0927601	-0.161842	0.547723	3815150000	4073150000	0.936658	-0.0944052	-0.242842	0.543936	4073150000	3743500000	1.08806	0.121757	0.161761	0.434343	3815150000	3992100000	0.955675	-0.0654081	0.18927	0.671164	3815150000	3743500000	1.01914	0.027352	-0.0499719	0.887183
P09470	Angiotensin-converting enzyme;Angiotensin-converting enzyme, soluble form	Ace	29	39773000	19907000	24635000	20309000	22216000	38260000	26243000	19957000	17460000	16856000	22655000	17167000	23249000	25329000	20295000	32365000	26156000	18534500	1.41121	0.496929	0.435214	0.115823	26669000	25309500	1.05372	0.0754847	0.0113457	0.84392	25309500	18534500	1.36553	0.449466	0.493024	0.0520488	26669000	26156000	1.01961	0.0280218	0.313185	0.890752	26669000	18534500	1.43888	0.524951	0.684159	0.0744404
P42703	Leukemia inhibitory factor receptor	Lifr	28	222230000	119170000	168270000	212700000	267690000	301870000	195190000	235520000	227460000	226420000	270290000	185990000	246200000	192340000	393300000	376430000	180592500	227540000	0.793674	-0.333382	-0.791358	0.166947	250067500	302067500	0.827853	-0.272553	-0.509386	0.42699	302067500	227540000	1.32754	0.408751	0.451867	0.214526	250067500	180592500	1.38471	0.46958	0.898817	0.0826056	250067500	227540000	1.099	0.136197	0.110613	0.534261
E9QPU1	von Willebrand factor;von Willebrand antigen 2	Vwf	28	7412000	2887200	8054800	3913300	7169100	5850100	2131900	2319600	3795700	27397000	41323000	15850000	8369700	6549700	5157800	8350100	5566825	22091425	0.25199	-1.98856	-3.23646	0.0574814	4367675	7106825	0.614575	-0.70234	-1.15243	0.0753671	7106825	22091425	0.321701	-1.63621	-1.61527	0.117339	4367675	5566825	0.78459	-0.349989	-0.188166	0.428013	4367675	22091425	0.197709	-2.33855	-3.5405	0.0270835
P06728	Apolipoprotein A-IV	Apoa4	28	3887300000	3894300000	4557600000	4121400000	4232800000	4609800000	5201000000	3748100000	4919200000	3337300000	3733800000	3005400000	5045300000	5832100000	3713700000	3432200000	4115150000	3748925000	1.09769	0.134468	-0.100229	0.423636	4447925000	4505825000	0.98715	-0.0186588	-0.129511	0.982008	4505825000	3748925000	1.2019	0.265314	0.306875	0.314315	4447925000	4115150000	1.08087	0.112187	0.424813	0.542204	4447925000	3748925000	1.18645	0.246655	0.273577	0.240682
Q61704	Inter-alpha-trypsin inhibitor heavy chain H3	Itih3	28	287470000	213310000	198870000	122170000	253640000	248690000	162190000	175410000	147710000	120890000	206010000	158080000	157630000	179070000	194840000	268850000	205455000	158172500	1.29893	0.377324	0.258528	0.27841	209982500	200097500	1.0494	0.069566	0.00249006	0.776831	200097500	158172500	1.26506	0.339204	0.381567	0.185827	209982500	205455000	1.02204	0.0314467	0.317727	0.824882	209982500	158172500	1.32755	0.40877	0.512753	0.129025
P26262	Plasma kallikrein;Plasma kallikrein heavy chain;Plasma kallikrein light chain	Klkb1	26	906010000	802850000	812840000	688310000	663340000	711990000	671850000	584850000	769700000	700390000	679010000	571690000	737200000	778880000	665640000	631810000	802502500	680197500	1.17981	0.238552	0.0535288	0.170941	658007500	703382500	0.93549	-0.0962054	-0.245536	0.543748	703382500	680197500	1.03409	0.0483557	0.0875633	0.743056	658007500	802502500	0.819944	-0.286402	-0.103831	0.112061	658007500	680197500	0.967377	-0.0478497	-0.160921	0.795297
E9Q9C6	Fc fragment of IgG-binding protein	Fcgbp	26	36631000	10388000	11556000	6636000	14037000	35363000	9919000	8220900	7526300	9276900	16592000	9001900	4550700	9751800	8838400	19092000	16302750	10599275	1.5381	0.62115	0.618719	0.501592	16884975	10558225	1.59922	0.677373	0.911886	0.304526	10558225	10599275	0.996127	-0.00559827	0.033024	0.796288	16884975	16302750	1.03571	0.0506247	0.343163	0.852752	16884975	10599275	1.59303	0.671774	0.900775	0.336579
E9Q6C2	Complement C1s-A subcomponent;Complement C1s-A subcomponent heavy chain;Complement C1s-A subcomponent light chain	C1s1	26	202580000	156720000	173350000	131820000	161450000	135360000	150980000	135150000	160720000	149120000	139070000	62194000	159160000	183420000	147560000	139380000	166117500	127776000	1.30007	0.378587	0.260395	0.204978	145735000	157380000	0.926007	-0.110905	-0.267529	0.513775	157380000	127776000	1.23169	0.300635	0.342579	0.256105	145735000	166117500	0.877301	-0.188857	0.0255417	0.362324	145735000	127776000	1.14055	0.189731	0.189593	0.401424
F8WI14	Extracellular matrix protein 1	Ecm1	25	211140000	187330000	118730000	122870000	131040000	139050000	162340000	153120000	187690000	208050000	94363000	72893000	114650000	125420000	113420000	110570000	160017500	140749000	1.1369	0.185105	-0.0254258	0.505488	146387500	116015000	1.2618	0.335481	0.40035	0.0507255	116015000	140749000	0.824269	-0.278813	-0.243155	0.690856	146387500	160017500	0.914822	-0.128437	0.105675	0.716358	146387500	140749000	1.04006	0.0566677	-0.00672107	0.608262
Q8CG16	Complement C1r-A subcomponent;Complement C1r-A subcomponent heavy chain;Complement C1r-A subcomponent light chain;Complement C1r-B subcomponent;Complement C1r-B subcomponent heavy chain;Complement C1r-B subcomponent light chain	C1ra	25	86224000	55969000	74698000	67253000	98605000	64704000	81919000	79788000	78035000	73413000	69104000	19809000	81086000	112030000	83046000	82749000	71036000	60090250	1.18216	0.241419	0.0577644	0.393382	81254000	89727750	0.905562	-0.143115	-0.315722	0.470097	89727750	60090250	1.49322	0.578423	0.62338	0.131747	81254000	71036000	1.14384	0.193888	0.533172	0.365871	81254000	60090250	1.3522	0.435308	0.551905	0.213569
E9Q8B5	Predicted gene 4788	Gm4788	25	59583000	48713000	53729000	40886000	42368000	44098000	34342000	37982000	46442000	41079000	26120000	17832000	44150000	42737000	38736000	44520000	50727750	32868250	1.54337	0.626081	0.626003	0.0585006	39697500	42535750	0.933274	-0.0996277	-0.250656	0.509198	42535750	32868250	1.29413	0.371981	0.414699	0.163767	39697500	50727750	0.78256	-0.353727	-0.193124	0.089475	39697500	32868250	1.20778	0.272354	0.311491	0.278787
P06683	Complement component C9	C9	25	264110000	186160000	138150000	109140000	129910000	162250000	96331000	97649000	128780000	102710000	104560000	71501000	128230000	124520000	111700000	137360000	174390000	101887750	1.71159	0.775337	0.846491	0.0496413	121535000	125452500	0.968773	-0.0457694	-0.170074	0.722626	125452500	101887750	1.23128	0.300161	0.342099	0.143202	121535000	174390000	0.696915	-0.520945	-0.414903	0.164876	121535000	101887750	1.19283	0.254391	0.28499	0.355392
P52480-2	Pyruvate kinase PKM	Pkm	25	68471000	42327000	49018000	34904000	47516000	62478000	45451000	34360000	40108000	31072000	45025000	34137000	44131000	45907000	34930000	48834000	48680000	37585500	1.29518	0.373153	0.252367	0.19286	47451250	43450500	1.09208	0.127073	0.0885321	0.639528	43450500	37585500	1.15604	0.209197	0.250149	0.275581	47451250	48680000	0.974759	-0.0368831	0.227102	0.929928	47451250	37585500	1.26249	0.33627	0.405789	0.19838
O09159	Lysosomal alpha-mannosidase	Man2b1	24	52424000	38913000	45198000	40017000	29511000	36365000	36641000	26280000	44472000	51537000	30075000	34132000	37874000	41406000	27213000	38409000	44138000	40054000	1.10196	0.140075	-0.0919462	0.470401	32199250	36225500	0.888856	-0.169979	-0.355914	0.428559	36225500	40054000	0.904417	-0.144941	-0.10783	0.582162	32199250	44138000	0.729513	-0.454994	-0.327433	0.0390858	32199250	40054000	0.803896	-0.314919	-0.554941	0.227231
Q91X70	Complement component 6	C6	24	49624000	35883000	33656000	30339000	31785000	40264000	29320000	25848000	23553000	29569000	38635000	18902000	37551000	45656000	31169000	36316000	37375500	27664750	1.35102	0.434044	0.342318	0.122928	31804250	37673000	0.844219	-0.244311	-0.467131	0.240913	37673000	27664750	1.36177	0.445482	0.488997	0.0877529	31804250	37375500	0.850938	-0.232873	-0.032837	0.331778	31804250	27664750	1.14963	0.201171	0.206471	0.398072
G3X977	Inter-alpha-trypsin inhibitor heavy chain H2	Itih2	23	2197700000	1460300000	1558000000	1094700000	1282200000	1610500000	1127200000	986840000	1210700000	1155800000	1319600000	1185400000	1225600000	1352500000	1151700000	1696200000	1577675000	1217875000	1.29543	0.373434	0.252782	0.172956	1251685000	1356500000	0.922731	-0.116018	-0.275178	0.571087	1356500000	1217875000	1.11383	0.155523	0.195893	0.409264	1251685000	1577675000	0.793373	-0.333929	-0.166865	0.255426	1251685000	1217875000	1.02776	0.0395055	-0.0320413	0.928979
Q01339	Beta-2-glycoprotein 1	Apoh	23	2303500000	2945500000	2553000000	2124600000	2816900000	2234900000	2403100000	2090500000	2153700000	2421200000	2222700000	1790100000	2967000000	3000800000	2382600000	2082300000	2481650000	2146925000	1.15591	0.209028	0.00991412	0.256459	2386350000	2608175000	0.91495	-0.128235	-0.293458	0.535622	2608175000	2146925000	1.21484	0.280769	0.322497	0.170328	2386350000	2481650000	0.961598	-0.056494	0.201093	0.766315	2386350000	2146925000	1.11152	0.152534	0.134715	0.406841
Q9R098	Hepatocyte growth factor activator;Hepatocyte growth factor activator short chain;Hepatocyte growth factor activator long chain	Hgfac	22	176850000	202990000	205340000	187980000	145190000	169510000	154930000	125180000	173080000	182380000	133840000	121270000	164590000	182380000	122980000	142110000	193290000	152642500	1.26629	0.34061	0.204294	0.0796831	148702500	153015000	0.971816	-0.0412442	-0.163303	0.857777	153015000	152642500	1.00244	0.00351638	0.0422375	0.967415	148702500	193290000	0.769323	-0.378338	-0.225765	0.043285	148702500	152642500	0.974188	-0.0377278	-0.145987	0.900346
Q3UPN1	Vascular cell adhesion protein 1	Vcam1	22	66376000	38654000	43751000	38734000	34450000	45911000	38559000	25598000	32322000	33892000	40584000	29042000	36968000	39257000	25584000	30839000	46878750	33960000	1.38041	0.465098	0.388192	0.0830178	36129500	33162000	1.08948	0.123646	0.0834046	0.642178	33162000	33960000	0.976502	-0.0343054	0.00400548	0.82575	36129500	46878750	0.770701	-0.375757	-0.222342	0.186719	36129500	33960000	1.06388	0.0893408	0.0414832	0.764225
Q61233	Plastin-2	Lcp1	22	22093000	15398000	16552000	11535000	11857000	19438000	12946000	9423300	11332000	10787000	13452000	10236000	11685000	11794000	10118000	15133000	16394500	11451750	1.43162	0.517644	0.465815	0.0591911	13416075	12182500	1.10126	0.139152	0.106605	0.688219	12182500	11451750	1.06381	0.0892421	0.128893	0.651739	13416075	16394500	0.818328	-0.289249	-0.107608	0.315368	13416075	11451750	1.17153	0.228395	0.246636	0.467096
Q62351	Transferrin receptor protein 1	Tfrc	22	46528000	23851000	26020000	34824000	26507000	37008000	26985000	17728000	26586000	26511000	36993000	23682000	33685000	31002000	20918000	38418000	32805750	28443000	1.15339	0.205875	0.00525666	0.514483	27057000	31005750	0.872645	-0.196534	-0.395646	0.4721	31005750	28443000	1.0901	0.124462	0.164495	0.652475	27057000	32805750	0.824764	-0.277947	-0.0926174	0.379397	27057000	28443000	0.951271	-0.0720718	-0.196657	0.713551
Q8BH35	Complement component C8 beta chain	C8b	21	166160000	102640000	109400000	57925000	318490000	354170000	120450000	199080000	119010000	40959000	147230000	91908000	207160000	122870000	275730000	324350000	109031250	99776750	1.09275	0.127966	-0.109834	0.712943	248047500	232527500	1.06674	0.0932151	0.0378737	0.886674	232527500	99776750	2.33048	1.22063	1.27255	0.0252167	248047500	109031250	2.27501	1.18587	1.84883	0.0256394	248047500	99776750	2.48603	1.31384	1.84805	0.0250408
Q03311	Cholinesterase	Bche	21	136750000	113380000	115450000	101410000	105810000	97041000	108030000	76060000	99323000	97344000	92273000	76935000	103670000	91207000	69255000	100190000	116747500	91468750	1.27636	0.352041	0.221179	0.0605149	96735250	91080500	1.06209	0.0868995	0.0284243	0.658322	91080500	91468750	0.995755	-0.00613672	0.0324797	0.930019	96735250	116747500	0.828585	-0.271278	-0.0837727	0.168653	96735250	91468750	1.05758	0.0807628	0.0288275	0.692064
Q9CPY7	Cytosol aminopeptidase	Lap3	21	282740000	176900000	168030000	123820000	178230000	355550000	132960000	138950000	130230000	129900000	133200000	101400000	159210000	138540000	102800000	188500000	187872500	123682500	1.51899	0.603113	0.592074	0.0703931	201422500	147262500	1.36778	0.451835	0.574437	0.325101	147262500	123682500	1.19065	0.251749	0.293162	0.326723	201422500	187872500	1.07212	0.100471	0.409273	0.912546	201422500	123682500	1.62854	0.703583	0.947705	0.106751
Q61646	Haptoglobin;Haptoglobin alpha chain;Haptoglobin beta chain	Hp	21	210900000	4342800000	1246200000	109800000	916450000	137340000	402340000	608300000	61474000	846210000	2126300000	33213000	916100000	1572800000	73072000	47019000	1477425000	766799250	1.92674	0.946164	1.09884	0.469288	516107500	652247750	0.791275	-0.337748	-0.60693	0.600287	652247750	766799250	0.850611	-0.233429	-0.197278	0.951254	516107500	1477425000	0.349329	-1.51734	-1.73641	0.673434	516107500	766799250	0.673067	-0.571177	-0.933011	0.589972
A0A0R4J0S2	Insulin-like growth factor-binding protein complex acid labile subunit	Igfals	21	224450000	237280000	168070000	209840000	280170000	199290000	222980000	160640000	197630000	244160000	224110000	164760000	204020000	233660000	220410000	198300000	209910000	207665000	1.01081	0.0155128	-0.275955	0.9215	215770000	214097500	1.00781	0.0112263	-0.0847972	0.942214	214097500	207665000	1.03098	0.0440099	0.0831703	0.741536	215770000	209910000	1.02792	0.0397234	0.328705	0.919319	215770000	207665000	1.03903	0.0552362	-0.00883301	0.856671
Q8K182	Complement component C8 alpha chain	C8a	20	88332000	59737000	58902000	32464000	174930000	207080000	66434000	118780000	73684000	20629000	92236000	51969000	112350000	70487000	181440000	193840000	59858750	59629500	1.00384	0.00553591	-0.290693	0.823849	141806000	139529250	1.01632	0.023351	-0.0666564	0.983739	139529250	59629500	2.33994	1.22647	1.27846	0.0384958	141806000	59858750	2.36901	1.24428	1.9263	0.0211291	141806000	59629500	2.37812	1.24982	1.75359	0.0392465
Q06770	Corticosteroid-binding globulin	Serpina6	20	4591800000	3148900000	3588400000	3712600000	1875300000	3011800000	2975200000	1659500000	2700400000	3173900000	2676600000	2424300000	2956100000	3060000000	1496100000	2534800000	3760425000	2743800000	1.37052	0.45472	0.372862	0.0307079	2380450000	2511750000	0.947726	-0.0774586	-0.217487	0.81432	2511750000	2743800000	0.915428	-0.127482	-0.0901822	0.506034	2380450000	3760425000	0.633027	-0.659661	-0.598881	0.023977	2380450000	2743800000	0.867574	-0.204941	-0.392685	0.338773
Q9ESB3	Histidine-rich glycoprotein	Hrg	20	2040900000	1926800000	1954700000	1627400000	1555800000	1524600000	1882500000	1200900000	1677100000	1691300000	1849000000	1316900000	1703000000	1914900000	1301100000	1279400000	1887450000	1633575000	1.15541	0.208406	0.00899508	0.225185	1540950000	1549600000	0.994418	-0.00807581	-0.113677	0.983805	1549600000	1633575000	0.948594	-0.0761368	-0.0382797	0.667808	1540950000	1887450000	0.816419	-0.292618	-0.112076	0.137874	1540950000	1633575000	0.943299	-0.0842126	-0.214569	0.656226
Q9DBB9	Carboxypeptidase N subunit 2	Cpn2	20	1085700000	1101400000	1034000000	780850000	937270000	914570000	940920000	713260000	917210000	929370000	876310000	765160000	1006400000	974290000	759950000	825280000	1000487500	872012500	1.14733	0.198282	-0.00595953	0.288992	876505000	891480000	0.983202	-0.0244401	-0.138161	0.893083	891480000	872012500	1.02232	0.0318536	0.0708821	0.868194	876505000	1000487500	0.876078	-0.190869	0.0228729	0.343868	876505000	872012500	1.00515	0.00741351	-0.0793881	0.989092
Q06890	Clusterin;Clusterin beta chain;Clusterin alpha chain	Clu	20	1114800000	1062500000	971280000	820860000	991020000	1033700000	822110000	687030000	909280000	829650000	861070000	626430000	1028000000	979720000	770330000	878010000	992360000	806607500	1.23029	0.298997	0.14282	0.131612	883465000	914015000	0.966576	-0.0490449	-0.174974	0.764572	914015000	806607500	1.13316	0.180351	0.22099	0.323308	883465000	992360000	0.890267	-0.167691	0.053614	0.391558	883465000	806607500	1.09528	0.131306	0.103397	0.553074
A8DUK4	Hemoglobin subunit beta-1	Hbbt1	20	7967100000	1864100000	5940200000	5711400000	4533100000	12095000000	12399000000	4488200000	2845300000	1537900000	12936000000	16499000000	7362600000	5689000000	2740100000	10232000000	5370700000	8454550000	0.635244	-0.654618	-1.2659	0.800203	8378825000	6505925000	1.28788	0.364994	0.444507	0.520838	6505925000	8454550000	0.769518	-0.377974	-0.343391	0.922618	8378825000	5370700000	1.5601	0.641638	1.12702	0.269068	8378825000	8454550000	0.991043	-0.01298	-0.109476	0.616605
D3YXF5	Complement component 7	C7	20	74457000	58863000	64122000	60002000	55731000	76970000	64022000	52791000	65791000	48366000	63832000	55804000	67736000	65988000	53779000	90475000	64361000	58448250	1.10116	0.139027	-0.0934944	0.405107	62378500	69494500	0.897603	-0.15585	-0.334775	0.508405	69494500	58448250	1.18899	0.249739	0.291131	0.273393	62378500	64361000	0.969197	-0.0451379	0.216154	0.771487	62378500	58448250	1.06724	0.093889	0.0481934	0.65357
P97290	Plasma protease C1 inhibitor	Serping1	20	1263700000	1041700000	1000700000	836490000	957390000	1088000000	817300000	662660000	722050000	824500000	923860000	660870000	1105200000	950200000	885190000	968180000	1035647500	782820000	1.32297	0.403781	0.297611	0.0640044	881337500	977192500	0.901908	-0.148948	-0.324449	0.407061	977192500	782820000	1.2483	0.319962	0.362116	0.0757573	881337500	1035647500	0.851001	-0.232767	-0.0326954	0.292884	881337500	782820000	1.12585	0.171014	0.161979	0.470676
P16301	Phosphatidylcholine-sterol acyltransferase	Lcat	20	312990000	209960000	210180000	193940000	231490000	288490000	225950000	195630000	181790000	186280000	230590000	169520000	219100000	227420000	202690000	295980000	231767500	192045000	1.20684	0.271234	0.101808	0.240201	235390000	236297500	0.99616	-0.00555133	-0.1099	0.981664	236297500	192045000	1.23043	0.29916	0.341088	0.136298	235390000	231767500	1.01563	0.0223748	0.305695	0.873388	235390000	192045000	1.2257	0.293609	0.342849	0.157492
G3X8T9	Serine protease inhibitor A3N	Serpina3n	20	581890000	599200000	550780000	446770000	671160000	600070000	581520000	466420000	434970000	479210000	617360000	427300000	588240000	650350000	484150000	448510000	544660000	489710000	1.11221	0.153428	-0.0722201	0.401104	579792500	542812500	1.06813	0.0950827	0.040668	0.618941	542812500	489710000	1.10844	0.148526	0.18882	0.46036	579792500	544660000	1.0645	0.0901808	0.395625	0.645907	579792500	489710000	1.18395	0.243609	0.269082	0.238623
P97449	Aminopeptidase N	Anpep	19	22640000	16883000	19304000	18292000	14538000	15002000	16234000	11601000	12650000	12386000	14180000	12782000	15482000	14492000	11243000	19285000	19279750	12999500	1.48311	0.56863	0.541135	0.00538091	14343750	15125500	0.948316	-0.0765606	-0.216143	0.776392	15125500	12999500	1.16354	0.218527	0.25958	0.328315	14343750	19279750	0.74398	-0.426664	-0.289859	0.04155	14343750	12999500	1.10341	0.141966	0.119124	0.440852
F8VQ07	Albumin superfamily member 1	Albfm1	19	33499000	29013000	27096000	21266000	31697000	33038000	29510000	21453000	33343000	21521000	26336000	20171000	32894000	38136000	29596000	34291000	27718500	25342750	1.09374	0.129276	-0.107899	0.550049	28924500	33729250	0.857549	-0.221708	-0.433312	0.244785	33729250	25342750	1.33092	0.412427	0.455584	0.0583482	28924500	27718500	1.04351	0.0614428	0.357511	0.784002	28924500	25342750	1.14133	0.190719	0.191051	0.409567
Q9QXC1	Fetuin-B	Fetub	19	1107800000	1053100000	1299200000	1059200000	1273500000	1235900000	1336200000	903050000	1283800000	985530000	1400500000	997210000	1405700000	1495400000	1250900000	1192900000	1129825000	1166760000	0.968344	-0.0464085	-0.367428	0.848312	1187162500	1336225000	0.888445	-0.170646	-0.356912	0.345055	1336225000	1166760000	1.14524	0.195655	0.23646	0.270233	1187162500	1129825000	1.05075	0.0714181	0.370741	0.749045	1187162500	1166760000	1.01749	0.0250096	-0.0534278	0.902375
Q64727	Vinculin	Vcl	19	11966000	8270400	9723700	7855900	8127200	14593000	8863500	7713800	5894900	5651700	8234000	7554700	6708300	6794800	6005400	11541000	9454000	6833825	1.38341	0.468232	0.392821	0.0540476	9824375	7762375	1.26564	0.339867	0.406913	0.268263	7762375	6833825	1.13588	0.183805	0.224482	0.557694	9824375	9454000	1.03918	0.0554408	0.34955	0.922834	9824375	6833825	1.43761	0.523672	0.682273	0.0886546
Q3UTR7	Angiotensinogen;Angiotensin-1;Angiotensin-2;Angiotensin-3;Angiotensin-4;Angiotensin 1-9;Angiotensin 1-7;Angiotensin 1-5;Angiotensin 1-4	Agt	19	493530000	575190000	543360000	412510000	436010000	490070000	394150000	300130000	348180000	430730000	486000000	395460000	548030000	502240000	345970000	366220000	506147500	415092500	1.21936	0.286125	0.123805	0.141741	405090000	440615000	0.919374	-0.121276	-0.283046	0.627441	440615000	415092500	1.06149	0.0860857	0.125703	0.746836	405090000	506147500	0.80034	-0.321315	-0.150137	0.144434	405090000	415092500	0.975903	-0.0351904	-0.142244	0.823722
P26928	Hepatocyte growth factor-like protein;Hepatocyte growth factor-like protein alpha chain;Hepatocyte growth factor-like protein beta chain	Mst1	19	67986000	66077000	58517000	44006000	52325000	55366000	45600000	41325000	53822000	46492000	45504000	34044000	60765000	61585000	42685000	44647000	59146500	44965500	1.31538	0.395474	0.285341	0.100885	48654000	52420500	0.928148	-0.107573	-0.262543	0.632921	52420500	44965500	1.16579	0.221313	0.262396	0.323798	48654000	59146500	0.822602	-0.281734	-0.0976408	0.20953	48654000	44965500	1.08203	0.11374	0.0774803	0.547678
O88968	Transcobalamin-2	Tcn2	19	117530000	93703000	90395000	87309000	98302000	98528000	88639000	69097000	76599000	87532000	103150000	74726000	110920000	108310000	76478000	95730000	97234250	85501750	1.13722	0.185511	-0.0248266	0.311772	88641500	97859500	0.905804	-0.14273	-0.315145	0.487098	97859500	85501750	1.14453	0.194758	0.235553	0.328095	88641500	97234250	0.911628	-0.133482	0.098984	0.483811	88641500	85501750	1.03672	0.0520283	-0.0135657	0.802275
Q01279	Epidermal growth factor receptor	Egfr	18	162150000	102670000	126770000	101240000	301200000	368580000	181490000	234910000	157930000	105990000	188320000	157970000	299090000	211590000	410740000	447450000	123207500	152552500	0.80764	-0.308216	-0.754181	0.241096	271545000	342217500	0.793487	-0.333722	-0.600906	0.326968	342217500	152552500	2.24328	1.16561	1.21693	0.00470583	271545000	123207500	2.20396	1.1401	1.78812	0.00302549	271545000	152552500	1.78001	0.831885	1.13699	0.0195986
A0A075B5P6	Immunoglobulinmu chain C region	Ighm	18	1523900000	200090000	339810000	531050000	258530000	448080000	74993000	46441000	167070000	219980000	224770000	106890000	31305000	49104000	37005000	113480000	648712500	179677500	3.61043	1.85217	2.43724	0.040014	207011000	57723500	3.58625	1.84248	2.6551	0.082137	57723500	179677500	0.321262	-1.63818	-1.61726	0.00405922	207011000	648712500	0.319111	-1.64787	-1.90953	0.0699682	207011000	179677500	1.15213	0.204298	0.211085	0.700483
Q91WP0	Mannan-binding lectin serine protease 2;Mannan-binding lectin serine protease 2 A chain;Mannan-binding lectin serine protease 2 B chain	Masp2	18	76997000	113110000	100980000	75158000	76016000	57242000	74841000	53753000	82273000	75095000	72515000	49943000	81588000	86797000	56587000	48390000	91561250	69956500	1.30883	0.388279	0.274712	0.120301	65463000	68340500	0.957895	-0.0620611	-0.194449	0.883175	68340500	69956500	0.9769	-0.0337173	0.00459999	0.844781	65463000	91561250	0.714964	-0.484057	-0.365979	0.0543425	65463000	69956500	0.935767	-0.0957784	-0.231632	0.699655
Q8BPB5	EGF-containing fibulin-like extracellular matrix protein 1	Efemp1	18	48729000	38466000	43460000	41603000	35654000	50660000	29799000	28180000	48248000	35718000	32965000	21973000	39488000	35951000	34012000	45351000	43064500	34726000	1.24012	0.310483	0.159788	0.182605	36073250	38700500	0.932113	-0.101423	-0.253342	0.56662	38700500	34726000	1.11445	0.156336	0.196715	0.440134	36073250	43064500	0.837656	-0.25557	-0.0629389	0.222257	36073250	34726000	1.0388	0.0549132	-0.0093096	0.816859
Q8VCS0	N-acetylmuramoyl-L-alanine amidase	Pglyrp2	18	441100000	232410000	236070000	193040000	178050000	300640000	218420000	142210000	177480000	201610000	216700000	153600000	211440000	245220000	160900000	275100000	275655000	187347500	1.47136	0.557147	0.524171	0.112938	209830000	223165000	0.940246	-0.0888898	-0.23459	0.683307	223165000	187347500	1.19118	0.252394	0.293815	0.293895	209830000	275655000	0.761205	-0.393643	-0.246064	0.284431	209830000	187347500	1.12	0.163504	0.1509	0.652244
A0A0R4J0I9	Prolow-density lipoprotein receptor-related protein 1;Low-density lipoprotein receptor-related protein 1 85 kDa subunit;Low-density lipoprotein receptor-related protein 1 515 kDa subunit;Low-density lipoprotein receptor-related protein 1 intracellular domain	Lrp1	18	8887800	6540300	6292500	5696900	7058600	7951100	7337200	4754000	6571500	6414300	5362600	5615100	5756000	5734700	6055900	7031200	6854375	5990875	1.14414	0.194258	-0.011904	0.353174	6775225	6144450	1.10266	0.140985	0.109347	0.566324	6144450	5990875	1.02563	0.0365171	0.0755963	0.805793	6775225	6854375	0.988453	-0.0167563	0.253796	0.923617	6775225	5990875	1.13092	0.177502	0.171552	0.467156
P55065	Phospholipid transfer protein	Pltp	18	112520000	149190000	115760000	116100000	100400000	81896000	119220000	100630000	117740000	87867000	106530000	85762000	142470000	113140000	103550000	89856000	123392500	99474750	1.24044	0.310852	0.160334	0.110898	100536500	112254000	0.895616	-0.159047	-0.339559	0.469539	112254000	99474750	1.12847	0.174365	0.214939	0.417252	100536500	123392500	0.81477	-0.295535	-0.115945	0.140519	100536500	99474750	1.01067	0.0153171	-0.0677276	0.937101
P35917	Vascular endothelial growth factor receptor 3	Flt4	18	30562000	36021000	33202000	29600000	31277000	32806000	31980000	24112000	31296000	31840000	31916000	26575000	34241000	33549000	28717000	29890000	32346250	30406750	1.06379	0.0892068	-0.167091	0.548043	30043750	31599250	0.950774	-0.0728254	-0.210555	0.642006	31599250	30406750	1.03922	0.0554987	0.0947837	0.700371	30043750	32346250	0.928817	-0.106534	0.134726	0.522824	30043750	30406750	0.988062	-0.0173267	-0.115889	0.891298
P98064-2	Mannan-binding lectin serine protease 1;Mannan-binding lectin serine protease 1 heavy chain;Mannan-binding lectin serine protease 1 light chain	Masp1	17	54000000	53608000	53472000	46099000	57748000	45135000	51853000	47603000	49164000	43433000	42056000	31695000	42105000	45963000	39954000	40843000	51794750	41587000	1.24546	0.316673	0.168933	0.0940574	50584750	42216250	1.19823	0.260904	0.288769	0.123039	42216250	41587000	1.01513	0.0216658	0.0605838	0.830467	50584750	51794750	0.976639	-0.0341034	0.230789	0.817113	50584750	41587000	1.21636	0.28257	0.326563	0.156888
P49182	Heparin cofactor 2	Serpind1	17	496510000	482000000	486240000	426640000	371510000	418630000	392300000	316910000	387260000	444710000	407560000	289570000	432570000	422990000	352320000	338890000	472847500	382275000	1.23693	0.306764	0.154294	0.100219	374837500	386692500	0.969343	-0.0449215	-0.168805	0.798009	386692500	382275000	1.01156	0.0165759	0.0554387	0.890413	374837500	472847500	0.792724	-0.33511	-0.168432	0.0629194	374837500	382275000	0.980544	-0.0283456	-0.132145	0.927258
Q6S9I3	Kininogen 2	Kng2	17	255890000	279370000	281600000	251930000	207070000	234350000	227570000	172880000	237680000	230410000	221150000	148050000	254500000	235950000	194450000	191000000	267197500	209322500	1.27649	0.352179	0.221384	0.0817014	210467500	218975000	0.961149	-0.0571687	-0.187129	0.759383	218975000	209322500	1.04611	0.0650388	0.104427	0.70871	210467500	267197500	0.787685	-0.344309	-0.180633	0.0606626	210467500	209322500	1.00547	0.00787008	-0.0787145	0.916754
E9Q6I2	Interleukin-1 receptor accessory protein	Il1rap	17	527310000	719230000	653340000	493480000	519750000	501260000	511610000	426650000	571030000	482470000	549080000	372770000	540630000	519090000	434700000	330980000	598340000	493837500	1.21161	0.276929	0.110221	0.20981	489817500	456350000	1.07334	0.102104	0.0511726	0.546916	456350000	493837500	0.924089	-0.113896	-0.076448	0.599143	489817500	598340000	0.818627	-0.288721	-0.106907	0.165877	489817500	493837500	0.99186	-0.0117921	-0.107723	0.987461
Q00519	Xanthine dehydrogenase/oxidase;Xanthine dehydrogenase;Xanthine oxidase	Xdh	17	21088000	14821000	16946000	12511000	13239000	22263000	13891000	9517700	9834500	11440000	14943000	11504000	11528000	13831000	10801000	14459000	16341500	11930375	1.36974	0.453901	0.371652	0.0731055	14727675	12654750	1.16381	0.218851	0.225849	0.56015	12654750	11930375	1.06072	0.0850396	0.124645	0.631812	14727675	16341500	0.901244	-0.150011	0.0770626	0.524492	14727675	11930375	1.23447	0.30389	0.358018	0.390249
P97298	Pigment epithelium-derived factor	Serpinf1	17	123540000	150270000	132060000	116690000	105450000	99545000	116190000	83556000	96530000	120330000	111310000	94006000	131560000	136060000	102180000	84838000	130640000	105544000	1.23778	0.307752	0.155754	0.0838059	101185250	113659500	0.890249	-0.167719	-0.352534	0.483834	113659500	105544000	1.07689	0.106874	0.146716	0.667256	101185250	130640000	0.774535	-0.368598	-0.212846	0.0617855	101185250	105544000	0.958702	-0.0608456	-0.180094	0.724491
P52430	Serum paraoxonase/arylesterase 1	Pon1	17	1668600000	2137800000	2461500000	1893400000	1921100000	1348900000	2144100000	1345800000	1555200000	1738700000	1875800000	1704300000	2391600000	2051900000	1458700000	1214700000	2040325000	1718500000	1.18727	0.247649	0.0669672	0.193733	1689975000	1779225000	0.949838	-0.0742471	-0.212682	0.847593	1779225000	1718500000	1.03534	0.0500991	0.0893255	0.993022	1689975000	2040325000	0.828287	-0.271797	-0.0844611	0.234564	1689975000	1718500000	0.983401	-0.0241479	-0.125952	0.80601
P63260	Actin, cytoplasmic 2;Actin, cytoplasmic 2, N-terminally processed	Actg1	17	323750000	229340000	268290000	171140000	236470000	352270000	233800000	190690000	184860000	153760000	232890000	162590000	217530000	199770000	161180000	286110000	248130000	183525000	1.35202	0.43512	0.343907	0.121797	253307500	216147500	1.17192	0.228874	0.240845	0.401299	216147500	183525000	1.17776	0.23604	0.277283	0.345163	253307500	248130000	1.02087	0.0297936	0.315535	0.910333	253307500	183525000	1.38023	0.464913	0.595583	0.0976051
P06801	NADP-dependent malic enzyme;Malic enzyme	Me1	16	36830000	26347000	17522000	12660000	11260000	23440000	12181000	8522400	9292200	16254000	15370000	12059000	13447000	14107000	7321900	18167000	23339750	13243800	1.76232	0.817472	0.908735	0.07608	13850850	13260725	1.0445	0.0628149	-0.00761087	0.93933	13260725	13243800	1.00128	0.00184252	0.0405455	0.90856	13850850	23339750	0.593445	-0.752815	-0.722428	0.108712	13850850	13243800	1.04584	0.0646574	0.00506651	0.982358
Q61247	Alpha-2-antiplasmin	Serpinf2	16	2078500000	1486600000	1584900000	1404800000	1419100000	1713800000	1530100000	1150900000	1354500000	1352300000	1417100000	1083200000	1431000000	1348900000	1222500000	1422600000	1638700000	1301775000	1.25882	0.332072	0.19168	0.110206	1453475000	1356250000	1.07169	0.0998831	0.0478503	0.62073	1356250000	1301775000	1.04185	0.059143	0.0984676	0.673193	1453475000	1638700000	0.886968	-0.173046	0.0465119	0.417099	1453475000	1301775000	1.11653	0.159026	0.144293	0.435322
P20029	78 kDa glucose-regulated protein	Hspa5	16	23020000	24685000	21596000	17539000	22908000	23963000	17551000	16087000	18234000	12770000	22429000	17015000	20231000	19133000	16162000	19350000	21710000	17612000	1.23268	0.301801	0.146963	0.17101	20127250	18719000	1.07523	0.104647	0.0549776	0.645334	18719000	17612000	1.06285	0.0879446	0.127582	0.588506	20127250	21710000	0.927096	-0.10921	0.131177	0.57324	20127250	17612000	1.14281	0.192591	0.193814	0.412169
Q62009-5	Periostin	Postn	16	31623000	22245000	25711000	25248000	29434000	36743000	28552000	21169000	20151000	17470000	25603000	17543000	24908000	25674000	26819000	34968000	26206750	20191750	1.29789	0.376172	0.256828	0.078203	28974500	28092250	1.03141	0.0446116	-0.0348465	0.887385	28092250	20191750	1.39127	0.476406	0.520257	0.0358763	28974500	26206750	1.10561	0.144845	0.468126	0.560464	28974500	20191750	1.43497	0.521018	0.678357	0.051825
Q64726	Zinc-alpha-2-glycoprotein	Azgp1	16	964020000	968180000	1010500000	767360000	834800000	860930000	884610000	686110000	915500000	876400000	972150000	750300000	1106200000	973280000	789730000	768440000	927515000	878587500	1.05569	0.0781846	-0.183373	0.64184	816612500	909412500	0.897956	-0.155283	-0.333927	0.445467	909412500	878587500	1.03508	0.0497489	0.0889715	0.825663	816612500	927515000	0.880431	-0.183719	0.0323558	0.312591	816612500	878587500	0.929461	-0.105534	-0.246025	0.539766
P00687	Alpha-amylase 1;Alpha-amylase	Amy1	16	68834000	69207000	62747000	52258000	58556000	44302000	60908000	40203000	64813000	63701000	63540000	45760000	76932000	85592000	49906000	47120000	63261500	59453500	1.06405	0.089566	-0.16656	0.61184	50992250	64887500	0.785856	-0.347663	-0.621764	0.249408	64887500	59453500	1.0914	0.126179	0.16623	0.720702	50992250	63261500	0.806055	-0.31105	-0.136521	0.144118	50992250	59453500	0.857683	-0.221484	-0.417091	0.310672
A0A0R4J131	Biotinidase	Btd	15	94685000	93494000	90091000	85801000	73049000	67534000	95113000	50996000	73947000	70121000	72910000	52631000	78420000	54039000	55563000	81543000	91017750	67402250	1.35037	0.433351	0.341295	0.0235626	71673000	67391250	1.06354	0.0888685	0.0313703	0.753788	67391250	67402250	0.999837	-0.000235466	0.038445	0.952104	71673000	91017750	0.787462	-0.344718	-0.181175	0.10634	71673000	67402250	1.06336	0.088633	0.0404389	0.780589
Q8R121	Protein Z-dependent protease inhibitor	Serpina10	15	420760000	439780000	408530000	357050000	366020000	297610000	353860000	246850000	289120000	329200000	357540000	278490000	374390000	323880000	277870000	272380000	406530000	313587500	1.29638	0.374494	0.254348	0.0371147	316085000	312130000	1.01267	0.0181655	-0.0744148	0.947882	312130000	313587500	0.995352	-0.00672103	0.0318891	0.946135	316085000	406530000	0.777519	-0.363049	-0.205488	0.0728107	316085000	313587500	1.00796	0.0114445	-0.073441	0.994052
P45700	Mannosyl-oligosaccharide 1,2-alpha-mannosidase IA	Man1a1	15	32532000	32824000	33061000	29023000	24139000	27206000	29242000	20679000	23168000	28132000	30130000	23220000	26245000	32221000	22727000	23557000	31860000	26162500	1.21777	0.284246	0.12103	0.0897155	25316500	26187500	0.96674	-0.0488004	-0.174609	0.805639	26187500	26162500	1.00096	0.00137793	0.0400759	0.988592	25316500	31860000	0.794617	-0.331668	-0.163868	0.0745925	25316500	26162500	0.967664	-0.0474224	-0.16029	0.792066
Q3V1J8	Hyaluronan-binding protein 2;Hyaluronan-binding protein 2 50 kDa heavy chain;Hyaluronan-binding protein 2 50 kDa heavy chain alternate form;Hyaluronan-binding protein 2 27 kDa light chain;Hyaluronan-binding protein 2 27 kDa light chain alternate form	Habp2	15	36115000	27529000	25758000	27089000	26359000	30258000	20930000	18576000	28693000	27187000	25368000	15034000	26297000	22404000	24427000	24079000	29122750	24070500	1.20989	0.27488	0.107195	0.246585	24030750	24301750	0.988849	-0.0161785	-0.1258	0.839252	24301750	24070500	1.00961	0.0137941	0.0526267	0.813543	24030750	29122750	0.825154	-0.277265	-0.091713	0.208032	24030750	24070500	0.998349	-0.00238443	-0.0938435	0.95676
P33587	Vitamin K-dependent protein C;Vitamin K-dependent protein C light chain;Vitamin K-dependent protein C heavy chain;Activation peptide	Proc	15	44716000	47259000	42601000	34078000	42584000	38449000	35514000	31593000	32325000	34384000	33446000	32381000	35792000	41630000	33070000	35878000	42163500	33134000	1.27251	0.347682	0.214741	0.0558549	37035000	36592500	1.01209	0.0173414	-0.075648	0.933679	36592500	33134000	1.10438	0.143236	0.183472	0.323828	37035000	42163500	0.878366	-0.187105	0.0278645	0.328776	37035000	33134000	1.11773	0.160577	0.146581	0.353328
P01898	H-2 class I histocompatibility antigen, Q10 alpha chain	H2-Q10	15	1004800000	1652100000	1443200000	1173300000	1026000000	614640000	1113200000	902660000	1232700000	1129100000	1186100000	873210000	1383700000	1232400000	1034100000	530350000	1318350000	1105277500	1.19278	0.254325	0.0768288	0.281678	914125000	1045137500	0.874646	-0.193229	-0.390702	0.687092	1045137500	1105277500	0.945588	-0.0807159	-0.0429084	0.63062	914125000	1318350000	0.693386	-0.52827	-0.424618	0.0632352	914125000	1105277500	0.827055	-0.273945	-0.49449	0.2382
P22599	Alpha-1-antitrypsin 1-2	Serpina1b	15	7145200000	7498300000	7786300000	7432700000	6988100000	6637500000	7592900000	6328000000	7250500000	7388500000	7205700000	7031100000	7074200000	8044900000	5694900000	5578200000	7465625000	7218950000	1.03417	0.048474	-0.227263	0.700288	6886625000	6598050000	1.04374	0.0617574	-0.00919302	0.677526	6598050000	7218950000	0.91399	-0.129749	-0.0924736	0.390727	6886625000	7465625000	0.922445	-0.116466	0.121553	0.430399	6886625000	7218950000	0.953965	-0.0679919	-0.190637	0.627854
A0A0R4J0X5	Alpha-1-antitrypsin 1-3	Serpina1c	15	19053000000	15993000000	17727000000	15400000000	18886000000	15093000000	18005000000	13420000000	16703000000	14655000000	15568000000	13881000000	16745000000	15627000000	13644000000	15383000000	17043250000	15201750000	1.12114	0.164963	-0.0551804	0.284804	16351000000	15349750000	1.06523	0.0911637	0.0348044	0.642729	15349750000	15201750000	1.00974	0.0139777	0.0528124	0.92365	16351000000	17043250000	0.959383	-0.0598216	0.196679	0.708645	16351000000	15201750000	1.0756	0.105141	0.0647946	0.595657
Q80YC5	Coagulation factor XII;Coagulation factor XIIa heavy chain;Coagulation factor XIIa light chain	F12	15	430830000	440930000	458410000	316520000	391260000	396340000	387730000	307960000	405070000	373070000	391330000	275020000	467270000	441140000	327580000	350490000	411672500	361122500	1.13998	0.189009	-0.019659	0.360858	370822500	396620000	0.934957	-0.0970286	-0.246767	0.640764	396620000	361122500	1.0983	0.135269	0.175419	0.507888	370822500	411672500	0.900771	-0.150768	0.0760578	0.46107	370822500	361122500	1.02686	0.0382405	-0.0339076	0.809997
E9Q589	Neural cell adhesion molecule 1	Ncam1	15	20136000	11654000	13939000	12587000	13520000	21110000	15445000	11094000	13232000	10856000	14345000	12567000	15592000	15272000	10863000	17302000	14579000	12750000	1.14345	0.193395	-0.0131802	0.445175	15292250	14757250	1.03625	0.0513768	-0.0247244	0.899253	14757250	12750000	1.15743	0.210927	0.251898	0.325097	15292250	14579000	1.04892	0.0689089	0.367413	0.817683	15292250	12750000	1.19939	0.262303	0.296663	0.341791
P97321-3	Prolyl endopeptidase FAP;Antiplasmin-cleaving enzyme FAP, soluble form	Fap	14	12357000	10716000	9589800	6617500	11172000	15881000	16129000	10089000	9099100	9057500	12658000	7509300	12208000	14679000	13181000	13962000	9820075	9580975	1.02496	0.0355616	-0.246338	0.921613	13317750	13507500	0.985952	-0.0204103	-0.132132	0.8184	13507500	9580975	1.40983	0.495516	0.539574	0.0247524	13317750	9820075	1.35618	0.439544	0.858982	0.123124	13317750	9580975	1.39002	0.475106	0.610621	0.088201
E9PZ00	Prosaposin	Psap	14	33933000	35352000	20029000	27801000	26715000	18201000	31113000	20131000	15223000	30088000	22506000	12712000	15702000	19621000	21172000	24857000	29278750	20132250	1.45432	0.540346	0.499351	0.104975	24040000	20338000	1.18202	0.241259	0.259376	0.355262	20338000	20132250	1.01022	0.0146694	0.0535115	0.803112	24040000	29278750	0.821073	-0.284417	-0.101199	0.304497	24040000	20132250	1.1941	0.255928	0.287258	0.36571
Q08761	Vitamin K-dependent protein S	Pros1	14	44503000	34139000	38201000	34106000	35369000	39793000	32086000	26116000	31896000	27820000	41691000	29203000	32729000	33831000	29734000	30867000	37737250	32652500	1.15572	0.208796	0.00957136	0.267962	33341000	31790250	1.04878	0.068713	0.00121389	0.763668	31790250	32652500	0.973593	-0.0386091	-0.000344854	0.897984	33341000	37737250	0.883504	-0.178692	0.0390231	0.352914	33341000	32652500	1.02109	0.0301039	-0.0459119	0.882054
Q8BK48	Pyrethroid hydrolase Ces2e	Ces2e	14	29495000	35037000	38563000	40399000	38675000	31948000	33563000	30505000	31143000	26065000	41077000	24700000	29407000	30555000	34882000	22679000	35873500	30746250	1.16676	0.222508	0.0298276	0.278572	33672750	29380750	1.14608	0.19671	0.192722	0.283835	29380750	30746250	0.955588	-0.0655392	-0.0275671	0.81392	33672750	35873500	0.938652	-0.091337	0.154881	0.624367	33672750	30746250	1.09518	0.131171	0.103197	0.472513
P09581	Macrophage colony-stimulating factor 1 receptor	Csf1r	14	450440000	341630000	378370000	290490000	254900000	303420000	277860000	242350000	233720000	243680000	318970000	189700000	328840000	340500000	238480000	269710000	365232500	246517500	1.48157	0.567125	0.538911	0.0292513	269632500	294382500	0.915926	-0.126698	-0.291158	0.524784	294382500	246517500	1.19416	0.256002	0.297462	0.237327	269632500	365232500	0.738249	-0.437821	-0.304656	0.0505714	269632500	246517500	1.09377	0.129304	0.100443	0.472993
Q9JJN5	Carboxypeptidase N catalytic chain	Cpn1	14	630360000	578650000	603620000	465340000	576970000	488210000	499840000	401020000	508780000	476240000	483630000	381420000	561880000	539400000	437870000	464830000	569492500	462517500	1.23129	0.300169	0.144552	0.112032	491510000	500995000	0.981068	-0.0275754	-0.142852	0.859057	500995000	462517500	1.08319	0.115288	0.155222	0.488295	491510000	569492500	0.863067	-0.212456	-0.00575787	0.271911	491510000	462517500	1.06268	0.0877128	0.0390813	0.652889
Q08879	Fibulin-1	Fbln1	14	33952000	19602000	23627000	19747000	22131000	28355000	20132000	18894000	26381000	26452000	22858000	9895200	15561000	19282000	20366000	26155000	24232000	21396550	1.13252	0.179535	-0.0336536	0.52018	22378000	20341000	1.10014	0.13769	0.104417	0.518464	20341000	21396550	0.950667	-0.0729876	-0.0350962	0.989991	22378000	24232000	0.92349	-0.114832	0.123719	0.696566	22378000	21396550	1.04587	0.0647029	0.00513367	0.674786
P33434	72 kDa type IV collagenase;PEX	Mmp2	14	20739000	12529000	15532000	10282000	13321000	19885000	14026000	9629400	10028000	7434600	14267000	10967000	15633000	14354000	13738000	21470000	14770500	10674150	1.38376	0.468597	0.393362	0.145663	14215350	16298750	0.872174	-0.197312	-0.39681	0.411166	16298750	10674150	1.52694	0.61064	0.655947	0.0334635	14215350	14770500	0.962415	-0.055269	0.202717	0.85957	14215350	10674150	1.33175	0.413328	0.519478	0.192043
P02762	Major urinary protein 6	Mup6	14	24654000	66900000	58112000	48696000	151920000	20912000	73793000	59222000	69366000	63513000	61429000	60966000	89795000	83408000	62275000	15461000	49590500	63818500	0.777055	-0.363911	-0.836457	0.178714	76461750	62734750	1.21881	0.285473	0.325529	0.753983	62734750	63818500	0.983018	-0.0247099	0.0137051	0.593257	76461750	49590500	1.54186	0.624674	1.10452	0.523565	76461750	63818500	1.19811	0.260764	0.294391	0.909722
Q9Z1T2	Thrombospondin-4	Thbs4	14	36875000	22091000	21064000	17495000	18492000	29163000	20189000	15121000	23108000	14283000	22602000	15474000	19143000	18307000	22872000	32267000	24381250	18866750	1.29229	0.369926	0.2476	0.261055	20741250	23147250	0.896057	-0.158338	-0.338498	0.556448	23147250	18866750	1.22688	0.294995	0.336878	0.289037	20741250	24381250	0.850705	-0.233269	-0.0333621	0.47919	20741250	18866750	1.09935	0.136657	0.111291	0.645363
Q3U3V1	Coagulation factor X;Factor X light chain;Factor X heavy chain;Activated factor Xa heavy chain	F10	13	261120000	291750000	291260000	291040000	240530000	225660000	259820000	211300000	284910000	244580000	239780000	177460000	257490000	253830000	216840000	220100000	283792500	236682500	1.19904	0.261883	0.0879947	0.150752	234327500	237065000	0.988453	-0.0167564	-0.126665	0.915182	237065000	236682500	1.00162	0.00232964	0.0410379	0.9217	234327500	283792500	0.8257	-0.27631	-0.0904468	0.0956274	234327500	236682500	0.99005	-0.0144268	-0.11161	0.992693
Q9CQF9	Prenylcysteine oxidase	Pcyox1	13	17518000	23254000	21413000	21667000	18751000	14379000	16590000	12029000	17796000	15984000	18813000	13907000	21155000	20145000	14405000	15748000	20963000	16625000	1.26093	0.334491	0.195254	0.0764278	15437250	17863250	0.86419	-0.210579	-0.41666	0.34092	17863250	16625000	1.07448	0.10364	0.143447	0.625404	15437250	20963000	0.736405	-0.441429	-0.309442	0.0464139	15437250	16625000	0.928556	-0.106939	-0.248097	0.568329
Q9JHH6	Carboxypeptidase B2	Cpb2	13	155980000	165190000	125970000	109010000	126760000	115140000	126510000	96503000	127060000	129830000	92255000	71161000	149870000	138390000	100450000	95069000	139037500	105076500	1.3232	0.404034	0.297986	0.126767	116228250	120944750	0.961003	-0.0573874	-0.187456	0.857597	120944750	105076500	1.15102	0.202908	0.243792	0.426223	116228250	139037500	0.835949	-0.258513	-0.066843	0.240335	116228250	105076500	1.10613	0.145521	0.124368	0.469939
Q8C255	Dipeptidase 2	Dpep2	13	24556000	20425000	16992000	13358000	13378000	20128000	14849000	11016000	15537000	13222000	14554000	10533000	16092000	17678000	12636000	17614000	18832750	13461500	1.39901	0.484405	0.416713	0.0804489	14842750	16005000	0.927382	-0.108764	-0.264326	0.574646	16005000	13461500	1.18895	0.249684	0.291075	0.215964	14842750	18832750	0.788135	-0.343485	-0.17954	0.22388	14842750	13461500	1.10261	0.140919	0.117579	0.615449
P63017	Heat shock cognate 71 kDa protein	Hspa8	13	12006000	9086500	11214000	9710800	10408000	17087000	11263000	6604600	7142000	4847700	10947000	11339000	10895000	9015200	7048900	10885000	10504325	8568925	1.22586	0.293797	0.135139	0.247669	11340650	9461025	1.19867	0.261435	0.289563	0.518911	9461025	8568925	1.10411	0.142882	0.183115	0.531011	11340650	10504325	1.07962	0.11052	0.422601	0.895406	11340650	8568925	1.32346	0.404317	0.506183	0.310735
Q07456	Protein AMBP;Alpha-1-microglobulin;Inter-alpha-trypsin inhibitor light chain;Trypstatin	Ambp	13	1604600000	1210900000	1012500000	740870000	1106200000	1030300000	789110000	734430000	979890000	886990000	948280000	609370000	932800000	1001800000	886340000	1018500000	1142217500	856132500	1.33416	0.415931	0.315561	0.202385	915010000	959860000	0.953274	-0.0690365	-0.204886	0.640983	959860000	856132500	1.12116	0.16499	0.205463	0.343392	915010000	1142217500	0.801082	-0.319978	-0.148363	0.320802	915010000	856132500	1.06877	0.0959534	0.051239	0.676038
P70663	SPARC-like protein 1	Sparcl1	13	37101000	17470000	22083000	17272000	24038000	40987000	19534000	14396000	18529000	12922000	16931000	14016000	27361000	23882000	20748000	32347000	23481500	15599500	1.50527	0.590025	0.57274	0.093967	24738750	26084500	0.948408	-0.0764202	-0.215933	0.621663	26084500	15599500	1.67214	0.741693	0.788421	0.00609486	24738750	23481500	1.05354	0.075248	0.37582	0.915307	24738750	15599500	1.58587	0.665273	0.891183	0.115258
Q91VB8	Hemoglobin subunit alpha	Hba-a1	13	4930000000	1120400000	3641100000	3539900000	3011400000	6775300000	8098300000	2703900000	1685000000	927130000	8155900000	8761000000	4892400000	3125400000	1552900000	6643500000	3307850000	4882257500	0.677525	-0.561655	-1.12857	0.851987	5147225000	4053550000	1.26981	0.344609	0.414007	0.503183	4053550000	4882257500	0.830261	-0.268362	-0.23259	0.884489	5147225000	3307850000	1.55606	0.637901	1.12206	0.259006	5147225000	4882257500	1.05427	0.0762465	0.0221644	0.549917
P70375	Coagulation factor VII;Factor VII light chain;Factor VII heavy chain	F7	13	24378000	32555000	27731000	28340000	31603000	20986000	28502000	22244000	27691000	25472000	26649000	19559000	30204000	26352000	29289000	21563000	28251000	24842750	1.13719	0.185477	-0.0248762	0.300766	25833750	26852000	0.962079	-0.0557725	-0.18504	0.75531	26852000	24842750	1.08088	0.112205	0.152105	0.549895	25833750	28251000	0.914437	-0.129045	0.104869	0.484818	25833750	24842750	1.03989	0.0564322	-0.00706851	0.81942
Q3UXJ2	Transforming growth factor-beta-induced protein ig-h3	Tgfbi	13	19260000	13159000	10168000	10077000	12330000	13830000	11518000	7786200	8395500	8312200	12364000	7573400	10957000	12646000	9891300	13987000	13166000	9161275	1.43714	0.523197	0.474019	0.0995194	11366050	11870325	0.957518	-0.0626285	-0.195298	0.722421	11870325	9161275	1.29571	0.373739	0.416476	0.0953412	11366050	13166000	0.863288	-0.212086	-0.00526723	0.509682	11366050	9161275	1.24066	0.311111	0.368671	0.247403
P08226	Apolipoprotein E	Apoe	13	1040700000	1756600000	1090900000	1420900000	1298600000	1627700000	1383200000	913320000	2115000000	1571500000	1154200000	849120000	1373700000	1867700000	952330000	1300300000	1327275000	1422455000	0.933088	-0.0999157	-0.446471	0.878333	1305705000	1373507500	0.950636	-0.0730358	-0.21087	0.816188	1373507500	1422455000	0.965589	-0.0505182	-0.0123832	0.978673	1305705000	1327275000	0.983749	-0.0236383	0.244669	0.934108	1305705000	1422455000	0.917924	-0.123554	-0.272611	0.82761
P08071	Lactotransferrin	Ltf	13	12825000	11079000	12520000	4057100	11040000	8905800	8761700	7148500	7991400	6941100	4095800	7224000	11320000	8094800	8192600	9307300	10120275	6563075	1.542	0.624805	0.624118	0.237242	8964000	9228675	0.97132	-0.0419809	-0.164405	0.820355	9228675	6563075	1.40615	0.491752	0.535769	0.0654213	8964000	10120275	0.885747	-0.175034	0.0438746	0.884292	8964000	6563075	1.36582	0.449771	0.573243	0.0987028
P10605	Cathepsin B;Cathepsin B light chain;Cathepsin B heavy chain	Ctsb	12	169920000	157060000	142950000	148140000	113720000	110690000	114790000	75442000	114950000	143040000	134980000	101750000	104970000	116170000	94080000	108830000	154517500	123680000	1.24933	0.321158	0.175558	0.0749856	103660500	106012500	0.977814	-0.0323681	-0.150023	0.800358	106012500	123680000	0.857152	-0.222378	-0.186107	0.223274	103660500	154517500	0.670866	-0.575904	-0.487794	0.013343	103660500	123680000	0.838135	-0.254746	-0.466165	0.240727
Q9WVJ3	Carboxypeptidase Q	Cpq	12	140930000	86761000	93152000	87469000	65340000	83430000	81918000	53754000	74687000	86022000	76838000	63684000	83869000	89548000	56320000	85722000	102078000	75307750	1.35548	0.438802	0.349346	0.0778178	71110500	78864750	0.901677	-0.149318	-0.325002	0.527025	78864750	75307750	1.04723	0.0665823	0.105987	0.799172	71110500	102078000	0.696629	-0.521537	-0.415689	0.0588037	71110500	75307750	0.944265	-0.0827357	-0.21239	0.641392
Q8R016	Bleomycin hydrolase	Blmh	12	32388000	23367000	25141000	17759000	25966000	42155000	20831000	16474000	17122000	13440000	18688000	12701000	19883000	15921000	13568000	27611000	24663750	15487750	1.59247	0.671265	0.692751	0.0219852	26356500	19245750	1.36947	0.453619	0.577107	0.252264	19245750	15487750	1.24264	0.313412	0.355495	0.307414	26356500	24663750	1.06863	0.0957666	0.403034	0.907816	26356500	15487750	1.70176	0.767031	1.04131	0.0532984
Q60963	Platelet-activating factor acetylhydrolase	Pla2g7	12	45241000	33562000	30499000	28062000	33084000	30094000	34604000	25045000	25580000	19084000	29830000	13228000	35588000	13392000	23467000	37149000	34341000	21930500	1.5659	0.646993	0.656896	0.0456862	30706750	27399000	1.12073	0.164433	0.144429	0.449554	27399000	21930500	1.24936	0.321185	0.363351	0.502981	30706750	34341000	0.894172	-0.161376	0.0619887	0.492078	30706750	21930500	1.40018	0.485617	0.626129	0.0853796
P29699	Alpha-2-HS-glycoprotein	Ahsg	12	6173000000	5517400000	6039700000	5385400000	7521700000	6481500000	6857500000	5388200000	6094200000	4902800000	6882200000	5350000000	6356000000	6717300000	5966600000	6323600000	5778875000	5807300000	0.995105	-0.0070789	-0.309329	0.987632	6562225000	6340875000	1.03491	0.0495031	-0.0275278	0.804555	6340875000	5807300000	1.09188	0.126814	0.166873	0.392753	6562225000	5778875000	1.13555	0.183396	0.519256	0.316961	6562225000	5807300000	1.13	0.176317	0.169804	0.361786
D3Z5G7	Carboxylic ester hydrolase	Ces1b	12	596670000	469200000	670880000	455460000	549930000	636960000	693080000	453120000	576470000	464650000	573450000	481740000	690120000	656960000	501650000	613610000	548052500	524077500	1.04575	0.0645339	-0.203539	0.78213	583272500	615585000	0.947509	-0.077788	-0.21798	0.667804	615585000	524077500	1.17461	0.232178	0.273379	0.197729	583272500	548052500	1.06426	0.089856	0.395195	0.678204	583272500	524077500	1.11295	0.15439	0.137453	0.47293
P11680	Properdin	Cfp	12	232880000	151030000	132110000	125600000	162370000	132090000	153890000	135320000	180420000	108480000	131010000	83015000	162530000	165680000	165490000	238400000	160405000	125731250	1.27578	0.351376	0.220197	0.259094	145917500	183025000	0.797254	-0.326888	-0.590681	0.124612	183025000	125731250	1.45568	0.541697	0.586256	0.0611656	145917500	160405000	0.909682	-0.136566	0.0948939	0.681964	145917500	125731250	1.16055	0.21481	0.226593	0.318685
Q61830	Macrophage mannose receptor 1	Mrc1	12	6273800	4189800	4721700	2991700	4184400	6183000	5518700	2823500	5807100	2995400	3898700	1313500	5185400	3991500	4384900	6134200	4544250	3503675	1.297	0.375173	0.255352	0.297805	4677400	4924000	0.949919	-0.074124	-0.212498	0.684964	4924000	3503675	1.40538	0.490962	0.53497	0.166388	4677400	4544250	1.0293	0.0416646	0.331279	0.927519	4677400	3503675	1.335	0.416838	0.524655	0.279774
Q3U2G2	Heat shock 70 kDa protein 4	Hspa4	12	10631000	7141300	8114500	4625600	7433200	19095000	7332100	6729000	4554300	4261500	7816300	7289800	6818800	6676700	5492200	9530500	7628100	5980475	1.2755	0.351064	0.219736	0.31895	10147325	7129550	1.42328	0.509217	0.660292	0.310237	7129550	5980475	1.19214	0.253551	0.294984	0.339513	10147325	7628100	1.33026	0.411704	0.822057	0.43499	10147325	5980475	1.69674	0.762767	1.03502	0.125657
P05064	Fructose-bisphosphate aldolase A;Fructose-bisphosphate aldolase	Aldoa	12	27582000	13423000	17498000	11815000	15878000	27775000	16305000	10207000	12112000	10161000	20355000	16905000	16074000	14554000	12197000	22213000	17579500	14883250	1.18116	0.240204	0.0559696	0.540516	17541250	16259500	1.07883	0.109469	0.0621922	0.874139	16259500	14883250	1.09247	0.127593	0.16766	0.6188	17541250	17579500	0.997824	-0.00314248	0.271852	0.968151	17541250	14883250	1.17859	0.237062	0.259423	0.58614
P03953-2	Complement factor D	Cfd	11	823250000	442910000	612250000	449120000	968430000	1484800000	898490000	718120000	763960000	492470000	967820000	761570000	1059700000	905160000	1202300000	1545100000	581882500	746455000	0.779528	-0.359327	-0.829686	0.235545	1017460000	1178065000	0.863671	-0.211447	-0.417959	0.402917	1178065000	746455000	1.57821	0.658292	0.704115	0.0318424	1017460000	581882500	1.74857	0.806172	1.34524	0.0250286	1017460000	746455000	1.36306	0.446845	0.568926	0.173405
A0A2I3BRQ1	Expressed sequence AI182371	AI182371	11	62711000	71375000	78605000	63571000	58472000	47843000	56297000	42832000	56670000	59179000	58495000	54036000	42692000	49009000	54723000	42421000	69065500	57095000	1.20966	0.274601	0.106781	0.0882512	51361000	47211250	1.0879	0.121543	0.0802571	0.513715	47211250	57095000	0.826889	-0.274234	-0.238525	0.0823562	51361000	69065500	0.743656	-0.427292	-0.290692	0.0368411	51361000	57095000	0.899571	-0.152691	-0.315598	0.343799
Q3UEL9	Thyroxine-binding globulin	Serpina7	11	76239000	71448000	57804000	36907000	31569000	35842000	29772000	22198000	43766000	38480000	41295000	42811000	25392000	34516000	26038000	41206000	60599500	41588000	1.45714	0.543139	0.503477	0.0787784	29845250	31788000	0.938884	-0.0909809	-0.237719	0.728374	31788000	41588000	0.764355	-0.387685	-0.353207	0.0621525	29845250	60599500	0.4925	-1.0218	-1.07919	0.00644916	29845250	41588000	0.717641	-0.478666	-0.796524	0.028396
Q8CFX1	GDH/6PGL endoplasmic bifunctional protein;Glucose 1-dehydrogenase;6-phosphogluconolactonase	H6pd	11	12197000	11823000	9994900	8658400	10819000	9240400	8657700	8126200	6519900	7593700	8981600	8410600	7780700	8411900	6913900	7040300	10668325	7876450	1.35446	0.437716	0.347743	0.0423999	9210825	7536700	1.22213	0.289397	0.3314	0.109929	7536700	7876450	0.956865	-0.0636126	-0.0256195	0.72149	9210825	10668325	0.863381	-0.211931	-0.005062	0.288688	9210825	7876450	1.16941	0.225785	0.242786	0.231499
Q8VCG4	Complement component C8 gamma chain	C8g	11	115760000	80656000	73518000	43807000	201490000	245720000	77820000	132200000	93844000	34150000	111050000	57179000	140390000	87951000	198070000	209300000	78435250	74055750	1.05914	0.0828904	-0.176422	0.757748	164307500	158927750	1.03385	0.0480273	-0.0297359	0.996712	158927750	74055750	2.14606	1.10169	1.15232	0.0298137	164307500	78435250	2.09482	1.06682	1.69094	0.041121	164307500	74055750	2.2187	1.14971	1.6059	0.0420631
Q9QZU3	Platelet glycoprotein V	Gp5	11	13282000	5461800	23025000	14549000	23294000	23432000	7208900	4730800	6601600	775990	132650000	56269000	20646000	35338000	18200000	38638000	14079450	4.90741e+07	0.286902	-1.80137	-2.95994	0.91726	14666425	28205500	0.519985	-0.943459	-1.51319	0.0691875	28205500	4.90741e+07	0.574753	-0.798987	-0.76897	0.547217	14666425	14079450	1.04169	0.0589263	0.354173	0.884403	14666425	4.90741e+07	0.298863	-1.74245	-2.66104	0.870223
Q921I1	Serotransferrin	Tf	11	2407.2	617507	1788.5	427232	3060.8	1251.6	513831	576028	587669	501620	17598000	1721.5	2284.4	1951.7	1579	1730	NA	NA	NA	NA	NA	NA	273543	1886.28	145.017	7.18008	10.6412	0.0755758	1886.28	4.67225e+06	0.000403719	-11.2744	-11.358	0.0171724	NA	NA	NA	NA	NA	NA	NA	NA	NA	NA	NA	NA
A2AFG7	Neural cell adhesion molecule L1	L1cam	11	8901100	6649100	7392700	6382700	5516000	8476700	7119000	3853700	5624600	5131800	6463500	4806800	4965300	6938100	4690900	7679600	7331400	5506675	1.33137	0.412907	0.311094	0.0452288	6241350	6068475	1.02849	0.0405241	-0.0409621	0.96813	6068475	5506675	1.10202	0.140153	0.180356	0.591515	6241350	7331400	0.851318	-0.232231	-0.0319846	0.322028	6241350	5506675	1.13342	0.180677	0.176235	0.638474
P28843	Dipeptidyl peptidase 4;Dipeptidyl peptidase 4 membrane form;Dipeptidyl peptidase 4 soluble form	Dpp4	11	9585700	7159900	7747400	6711900	4911500	10255000	7018500	4856200	4868800	5353500	6883300	5479100	6492400	6503600	5683800	8110500	7801225	5646175	1.38168	0.466427	0.390155	0.0333473	6760300	6697575	1.00937	0.0134484	-0.0814725	0.870668	6697575	5646175	1.18621	0.246365	0.28772	0.198529	6760300	7801225	0.866569	-0.206613	0.00199117	0.362237	6760300	5646175	1.19732	0.259813	0.29299	0.484443
A0A1B0GSX0	L-lactate dehydrogenase A chain;L-lactate dehydrogenase	Ldha	11	11220000	6539400	10012000	6353300	7273700	10387000	8196000	5793100	4575000	2890500	12227000	12296000	5613100	7419100	5093800	8933200	8531175	7997125	1.06678	0.093263	-0.161099	0.565488	7912450	6764800	1.16965	0.226077	0.236661	0.390178	6764800	7997125	0.845904	-0.241434	-0.20537	0.973415	7912450	8531175	0.927475	-0.10862	0.131959	0.733637	7912450	7997125	0.989412	-0.015357	-0.112982	0.680412
Q9R1E6	Ectonucleotide pyrophosphatase/phosphodiesterase family member 2	Enpp2	11	10263000	8190500	6994400	5629200	5599800	9299600	7413200	4708800	6862200	3876800	5678100	4521200	7065000	5278000	4774400	8112600	7769275	5234575	1.48422	0.569708	0.542726	0.0582682	6755350	6307500	1.071	0.0989622	0.0464725	0.768596	6307500	5234575	1.20497	0.268996	0.310597	0.315649	6755350	7769275	0.869496	-0.201749	0.00844217	0.457428	6755350	5234575	1.29053	0.367958	0.452541	0.241214
G3X8T3	Carboxypeptidase;Lysosomal protective protein;Lysosomal protective protein 32 kDa chain;Lysosomal protective protein 20 kDa chain	Ctsa	11	26732000	20599000	19757000	19535000	16971000	20191000	17263000	14273000	15733000	20656000	19276000	15046000	15930000	20166000	17041000	21913000	21655750	17677750	1.22503	0.292815	0.133689	0.142829	17174500	18762500	0.915363	-0.127584	-0.292484	0.501039	18762500	17677750	1.06136	0.0859174	0.125532	0.63789	17174500	21655750	0.793069	-0.334482	-0.167599	0.106958	17174500	17677750	0.971532	-0.0416666	-0.151798	0.836237
P16294	Coagulation factor IX;Coagulation factor IXa light chain;Coagulation factor IXa heavy chain	F9	11	43914000	49438000	33796000	39370000	40955000	34984000	34689000	33751000	33839000	42939000	36084000	28362000	36575000	41956000	31988000	34449000	41629500	35306000	1.17911	0.237693	0.0522593	0.245951	36094750	36242000	0.995937	-0.00587356	-0.110382	0.985644	36242000	35306000	1.02651	0.0377492	0.0768417	0.797308	36094750	41629500	0.867047	-0.205817	0.00304716	0.295193	36094750	35306000	1.02234	0.0318756	-0.043298	0.813838
P08607	C4b-binding protein	C4bpa	11	306600000	195810000	188020000	133740000	245020000	324560000	210140000	177990000	170970000	145810000	183030000	124540000	182930000	232710000	200220000	343770000	206042500	156087500	1.32004	0.400587	0.292894	0.229708	239427500	239907500	0.997999	-0.00288939	-0.105917	0.984259	239907500	156087500	1.53701	0.620123	0.665533	0.0385793	239427500	206042500	1.16203	0.216647	0.563356	0.430012	239427500	156087500	1.53393	0.617234	0.820309	0.0340906
P24270	Catalase	Cat	11	9884700	4020800	8990500	8423400	5165900	10381000	18013000	4635600	2262100	3012700	14066000	20734000	8944100	4417300	1923400	13170000	7829850	10018700	0.781524	-0.355639	-0.824237	0.848885	9548875	7113700	1.34232	0.424731	0.533885	0.440769	7113700	10018700	0.710042	-0.494023	-0.460699	0.788359	9548875	7829850	1.21955	0.286346	0.655797	0.775723	9548875	10018700	0.953105	-0.0692926	-0.192556	0.726584
Q03734	Serine protease inhibitor A3M	Serpina3m	11	162620000	275410000	259440000	217940000	276500000	160820000	327120000	260410000	193650000	262670000	120150000	92400000	246260000	266150000	224230000	146160000	228852500	167217500	1.36859	0.452692	0.369866	0.167301	256212500	220700000	1.16091	0.215254	0.220468	0.487651	220700000	167217500	1.31984	0.400361	0.443386	0.220927	256212500	228852500	1.11955	0.162923	0.492102	0.60872	256212500	167217500	1.53221	0.615615	0.817921	0.104504
P00920	Carbonic anhydrase 2	Ca2	11	185160000	67049000	121620000	119180000	112640000	183440000	194890000	84809000	102990000	55603000	176370000	177700000	143940000	98792000	70986000	194640000	123252250	128165750	0.961663	-0.0563968	-0.382183	0.998394	143944750	127089500	1.13263	0.17967	0.167227	0.621564	127089500	128165750	0.991603	-0.0121659	0.0263851	0.945544	143944750	123252250	1.16789	0.223901	0.572977	0.560032	143944750	128165750	1.12311	0.167504	0.156802	0.617515
A0A0G2JE26	Anthrax toxin receptor 2	Antxr2	11	7657700	8641500	7873400	7577400	7138900	7647000	8476100	5631600	7376400	6683900	8127300	6335100	9587100	8065600	6815200	7465300	7937500	7130675	1.11315	0.154646	-0.0704212	0.295631	7223400	7983300	0.904814	-0.144307	-0.317505	0.455323	7983300	7130675	1.11957	0.162947	0.203397	0.361816	7223400	7937500	0.910035	-0.136007	0.095636	0.416623	7223400	7130675	1.013	0.0186394	-0.062826	0.960367
Q00898	Alpha-1-antitrypsin 1-5	Serpina1e	10	397790000	28108000	49957000	52070000	622580000	4361900000	118870000	330500000	69117000	31100000	95605000	82678000	209880000	94559000	863950000	6185200000	131981250	69625000	1.8956	0.922656	1.06412	0.818141	1358462500	1838397250	0.738938	-0.436474	-0.754642	0.998869	1838397250	69625000	26.4043	4.7227	4.81261	0.0326136	1358462500	131981250	10.2928	3.36357	4.73708	0.036562	1358462500	69625000	19.5111	4.28623	6.23335	0.0143154
O35930	Platelet glycoprotein Ib alpha chain	Gp1ba	10	43905000	48855000	57683000	48479000	42519000	40423000	51308000	32578000	39658000	40606000	82038000	46603000	45628000	51340000	30780000	38874000	49730500	52226250	0.952213	-0.0706442	-0.40323	0.97173	41707000	41655500	1.00124	0.00178255	-0.0989269	0.968755	41655500	52226250	0.797597	-0.326268	-0.291124	0.345255	41707000	49730500	0.83866	-0.253841	-0.0606467	0.198367	41707000	52226250	0.798583	-0.324486	-0.569055	0.349604
Q9QWK4	CD5 antigen-like	Cd5l	10	37772000	12435000	14581000	15199000	13272000	12489000	14111000	3752600	11498000	9035300	13512000	6487900	12264000	18351000	11985000	10832000	19996750	10133300	1.97337	0.980661	1.14981	0.0594271	10906150	13358000	0.816451	-0.292562	-0.539323	0.348891	13358000	10133300	1.31823	0.3986	0.441606	0.167359	10906150	19996750	0.545396	-0.874624	-0.883982	0.121768	10906150	10133300	1.07627	0.106038	0.0661171	0.977807
Q9R1P4	Proteasome subunit alpha type-1	Psma1	10	27130000	19405000	14693000	12250000	14979000	25612000	14385000	11542000	12922000	10621000	13514000	10819000	10564000	17765000	7625500	18699000	18369500	11969000	1.53476	0.61801	0.614081	0.0666597	16629500	13663375	1.21709	0.283431	0.322473	0.412208	13663375	11969000	1.14156	0.191011	0.231766	0.744079	16629500	18369500	0.905278	-0.143568	0.0856081	0.673085	16629500	11969000	1.38938	0.474442	0.609642	0.149652
P40142	Transketolase	Tkt	10	9025600	6812100	7518900	5914400	5819000	9434400	7210700	3575000	4684400	2597200	7655300	8414500	6828800	5959500	4232900	7481700	7317750	5837850	1.2535	0.325963	0.182656	0.271759	6509775	6125725	1.06269	0.0877271	0.0296626	0.919473	6125725	5837850	1.04931	0.0694435	0.10888	0.66201	6509775	7317750	0.889587	-0.168792	0.0521526	0.460418	6509775	5837850	1.1151	0.157171	0.141556	0.644805
P17563	Selenium-binding protein 1	Selenbp1	10	4318700	2300200	5329000	2906500	2022900	4573800	4492000	2882600	552600	1988500	5646000	22815000	3381300	3122900	399550	4078600	3713600	7750525	0.479142	-1.06148	-1.86693	0.977683	3492825	2.74559e+06	1.27216	0.347279	0.418003	0.36415	2.74559e+06	7750525	0.354245	-1.49718	-1.47474	0.552664	3492825	3713600	0.94055	-0.0884241	0.158744	0.809212	3492825	7750525	0.450657	-1.1499	-1.78683	0.954779
P29788	Vitronectin	Vtn	10	1283400000	1073900000	1091900000	912890000	1249900000	1376400000	985520000	951530000	1034200000	867290000	1042200000	862900000	1213200000	1215200000	1112900000	1198100000	1090522500	951647500	1.14593	0.19652	-0.00856255	0.270523	1140837500	1184850000	0.962854	-0.0546111	-0.183303	0.688687	1184850000	951647500	1.24505	0.316205	0.358318	0.046494	1140837500	1090522500	1.04614	0.0650738	0.362326	0.772412	1140837500	951647500	1.1988	0.261594	0.295617	0.21512
P70274	Selenoprotein P	Sepp1	10	292460000	315380000	266090000	259230000	307930000	277970000	250250000	199730000	259890000	247580000	254140000	228910000	301100000	301720000	212600000	249670000	283290000	247630000	1.14401	0.194094	-0.0121475	0.196539	258970000	266272500	0.972575	-0.0401185	-0.161619	0.83516	266272500	247630000	1.07528	0.104717	0.144536	0.586519	258970000	283290000	0.914152	-0.129495	0.104273	0.459414	258970000	247630000	1.04579	0.0645989	0.00498018	0.794582
P05201	Aspartate aminotransferase, cytoplasmic	Got1	10	23006000	8371700	11931000	4868600	5266200	11150000	6168700	3707100	6277000	4449800	9867200	14779000	8044700	9741200	7011700	11480000	12044325	8843250	1.36198	0.445705	0.359544	0.523796	6573000	9069400	0.724745	-0.464455	-0.796508	0.13764	9069400	8843250	1.02557	0.0364304	0.0755086	0.687806	6573000	12044325	0.545734	-0.87373	-0.882797	0.171013	6573000	8843250	0.743279	-0.428025	-0.721811	0.406196
H7BWY6	Retinol-binding protein 4	Rbp4	10	443450000	837540000	767840000	450020000	667540000	252140000	623880000	412060000	655110000	594600000	726200000	459260000	674210000	984370000	471370000	238140000	624712500	608792500	1.02615	0.0372418	-0.243856	0.987695	488905000	592022500	0.825822	-0.276098	-0.514689	0.695121	592022500	608792500	0.972454	-0.0402986	-0.00205267	0.645864	488905000	624712500	0.782608	-0.353638	-0.193006	0.322244	488905000	608792500	0.803073	-0.316396	-0.55712	0.2698
Q923D2	Flavin reductase (NADPH)	Blvrb	10	11653000	2162600	7701300	7669700	5911900	14036000	26731000	4929900	3424100	389170	21110000	31493000	9778100	8812800	2112500	18734000	7296650	1.41041e+07	0.517344	-0.950805	-1.70344	0.89464	12902200	9859350	1.30863	0.388053	0.479007	0.594715	9859350	1.41041e+07	0.699043	-0.516547	-0.483467	0.739068	12902200	7296650	1.76824	0.822311	1.36664	0.317502	12902200	1.41041e+07	0.914786	-0.128494	-0.279899	0.523505
Q8R242	Di-N-acetylchitobiase	Ctbs	9	22476000	17737000	20186000	17370000	13264000	16979000	14940000	11593000	15975000	15328000	13911000	15198000	15681000	16941000	13760000	17873000	19442250	15103000	1.28731	0.36436	0.239378	0.0398809	14194000	16063750	0.883604	-0.178528	-0.368705	0.324644	16063750	15103000	1.06361	0.0889736	0.128622	0.567948	14194000	19442250	0.73006	-0.453914	-0.326	0.0354052	14194000	15103000	0.939813	-0.0895539	-0.222449	0.56633
P16015	Carbonic anhydrase 3	Ca3	9	4626200	3883600	1242500	4325900	2912100	3361800	513831	953990	407100	501620	7766600	48366000	625050	791280	343632	7156600	3519550	14260330	0.246807	-2.01854	-3.28076	0.957869	NA	NA	NA	NA	NA	NA	NA	NA	NA	NA	NA	NA	1.93543e+06	3519550	0.549908	-0.862737	-0.868217	0.153941	NA	NA	NA	NA	NA	NA
P55284	Cadherin-5	Cdh5	9	29916000	24812000	26878000	24863000	20219000	22404000	20660000	13991000	16676000	18376000	23295000	16892000	25679000	27263000	16881000	20705000	26617250	18809750	1.41508	0.500881	0.441052	0.0149083	19318500	22632000	0.853592	-0.228381	-0.443296	0.348561	22632000	18809750	1.20321	0.266883	0.308461	0.250412	19318500	26617250	0.725789	-0.462378	-0.337227	0.0374143	19318500	18809750	1.02705	0.0385024	-0.0335212	0.8909
Q60590	Alpha-1-acid glycoprotein 1	Orm1	9	1992300000	2055800000	1807000000	1910000000	1336800000	1177500000	1788400000	1344800000	1662600000	1949700000	1906700000	1186900000	1969000000	2114500000	1326100000	1268800000	1941275000	1676475000	1.15795	0.211574	0.0136747	0.251237	1411875000	1669600000	0.845637	-0.24189	-0.463508	0.370755	1669600000	1676475000	0.995899	-0.00592846	0.0326903	0.948637	1411875000	1941275000	0.727293	-0.459392	-0.333266	0.0263699	1411875000	1676475000	0.842169	-0.247819	-0.455944	0.318234
Q9Z2U0	Proteasome subunit alpha type-7	Psma7	9	36838000	24626000	24497000	18463000	26479000	42830000	25110000	18954000	19038000	17126000	23571000	19053000	19779000	20447000	16903000	28390000	26106000	19697000	1.32538	0.406406	0.301489	0.149643	28343250	21379750	1.32571	0.40676	0.506997	0.223191	21379750	19697000	1.08543	0.118269	0.158235	0.624036	28343250	26106000	1.0857	0.118624	0.433349	0.75282	28343250	19697000	1.43896	0.525029	0.684275	0.112211
O54782	Epididymis-specific alpha-mannosidase	Man2b2	9	18295000	610270	4002900	4450300	299513	5810500	2179100	4858900	1943500	9238500	456769	2434800	387778	3060500	2285000	5849600	6.83962e+06	3.51839e+06	1.94396	0.958999	1.11781	0.507407	NA	NA	NA	NA	NA	NA	NA	NA	NA	NA	NA	NA	3.287e+06	6.83962e+06	0.480583	-1.05714	-1.12606	0.497633	NA	NA	NA	NA	NA	NA
Q9QUM9	Proteasome subunit alpha type-6	Psma6	9	35315000	22092000	21604000	17415000	21633000	46532000	19480000	17248000	17112000	16915000	21518000	19436000	20878000	20009000	15205000	27178000	24106500	18745250	1.28601	0.362897	0.237217	0.212291	26223250	20817500	1.25967	0.33305	0.396712	0.493789	20817500	18745250	1.11055	0.151272	0.191596	0.547002	26223250	24106500	1.08781	0.121424	0.437063	0.889866	26223250	18745250	1.39893	0.484321	0.624217	0.278072
P07309	Transthyretin	Ttr	9	5088300000	7508900000	5619700000	5699200000	6039700000	1397000000	4907200000	4299300000	6187700000	5628800000	4148100000	5089400000	5796500000	7413700000	5438700000	2956700000	5979025000	5263500000	1.13594	0.183888	-0.0272239	0.368799	4160800000	5401400000	0.770319	-0.376472	-0.664869	0.345834	5401400000	5263500000	1.0262	0.0373109	0.0763987	0.941309	4160800000	5979025000	0.695899	-0.523049	-0.417694	0.150584	4160800000	5263500000	0.790501	-0.339162	-0.590707	0.283653
P00688	Pancreatic alpha-amylase;Alpha-amylase	Amy2	9	21838000	13825000	20677000	13994000	215800000	22191000	16227000	10887000	16221000	13552000	16209000	7951200	18164000	15334000	13748000	17607000	17583500	13483300	1.30409	0.383049	0.266985	0.201515	66276250	16213250	4.08778	2.03132	2.93765	0.309657	16213250	13483300	1.20247	0.266	0.307568	0.258862	66276250	17583500	3.76923	1.91427	2.81489	0.363695	66276250	13483300	4.91543	2.29732	3.29902	0.199998
P09813	Apolipoprotein A-II;Proapolipoprotein A-II	Apoa2	9	3769100000	8042900000	8301500000	7199500000	6437400000	3160300000	8202000000	6189900000	7302700000	7648600000	8393700000	7152000000	8339600000	7893500000	6418300000	2819500000	6828250000	7624250000	0.895596	-0.15908	-0.533871	0.432159	5997400000	6367725000	0.941843	-0.0864408	-0.230926	0.905541	6367725000	7624250000	0.835194	-0.259817	-0.223953	0.308228	5997400000	6828250000	0.878322	-0.187179	0.0277672	0.594458	5997400000	7624250000	0.786622	-0.346258	-0.601177	0.183705
Q11136	Xaa-Pro dipeptidase	Pepd	9	17859000	9405600	11754000	8770500	12300000	17467000	12371000	10557000	8513100	9443200	10581000	11500000	12992000	9668800	10553000	11129000	11947275	10009325	1.19361	0.255337	0.0783239	0.434937	13173750	11085700	1.18836	0.248966	0.270907	0.276942	11085700	10009325	1.10754	0.147355	0.187637	0.389405	13173750	11947275	1.10266	0.140984	0.463006	0.540258	13173750	10009325	1.31615	0.396321	0.494386	0.100824
Q91Y97	Fructose-bisphosphate aldolase B	Aldob	8	37132000	29326000	29611000	11726000	8806700	9999700	8957500	7217300	9665700	19624000	10029000	26631000	8055300	10363000	5310300	11053000	26948750	16487425	1.6345	0.708852	0.748277	0.164458	8745300	8695400	1.00574	0.00825548	-0.0892422	0.837849	8695400	16487425	0.527396	-0.923042	-0.894371	0.0692383	8745300	26948750	0.324516	-1.62364	-1.87739	0.00250055	8745300	16487425	0.530422	-0.914786	-1.43995	0.0555672
Q91YI0	Argininosuccinate lyase	Asl	8	19502000	4009800	13622000	3211100	2301900	2718400	1610100	1768000	1491500	3294300	2491800	8725100	1113800	1746800	1848000	3346500	10086225	4000675	2.52113	1.33407	1.67188	0.134955	2099600	2013775	1.04262	0.060212	-0.0115052	0.68906	2013775	4000675	0.503359	-0.990341	-0.9624	0.201265	2099600	10086225	0.208165	-2.2642	-2.72696	0.0114485	2099600	4000675	0.524811	-0.930129	-1.46259	0.23815
Q64442	Sorbitol dehydrogenase	Sord	8	41532000	26108000	27077000	16695000	12496000	13975000	11885000	5885700	10351000	14742000	14068000	28257000	11330000	17924000	4016700	12677000	27853000	16854500	1.65256	0.724699	0.771687	0.0825896	11060425	11486925	0.962871	-0.0545858	-0.183265	0.904095	11486925	16854500	0.681535	-0.553141	-0.520458	0.241134	11060425	27853000	0.3971	-1.33243	-1.49116	0.00577238	11060425	16854500	0.65623	-0.607727	-0.986934	0.171679
O09164	Extracellular superoxide dismutase [Cu-Zn]	Sod3	8	196850000	107340000	120420000	94951000	97943000	108230000	97003000	68348000	100520000	91482000	101570000	98288000	83839000	105760000	65206000	95203000	129890250	97965000	1.32588	0.406955	0.302301	0.180708	92881000	87502000	1.06147	0.0860675	0.0271796	0.699186	87502000	97965000	0.893197	-0.16295	-0.126035	0.331219	92881000	129890250	0.715073	-0.483838	-0.365688	0.13498	92881000	97965000	0.948104	-0.0768829	-0.203755	0.616039
P00329	Alcohol dehydrogenase 1	Adh1	8	21643000	6128900	9526700	2257700	5281200	3976100	2801500	1787800	2380000	6699400	1964200	43797000	2126700	3579700	343632	5232500	9889075	13710150	0.721296	-0.471337	-0.995151	0.815475	3461650	2.82063e+06	1.22726	0.295441	0.340442	0.389841	2.82063e+06	13710150	0.205733	-2.28115	-2.26721	0.201458	3461650	9889075	0.350048	-1.51438	-1.73248	0.109102	3461650	13710150	0.252488	-1.98571	-3.01994	0.357127
F6WR04	Cathepsin S	Ctss	8	92315000	46172000	53290000	44546000	35860000	61814000	41099000	36898000	39123000	36939000	54528000	26158000	34868000	41550000	32206000	49942000	59080750	39187000	1.50766	0.592313	0.57612	0.104011	43917750	39641500	1.10787	0.147793	0.119532	0.588846	39641500	39187000	1.0116	0.0166364	0.0554999	0.866878	43917750	59080750	0.743351	-0.427884	-0.291477	0.20994	43917750	39187000	1.12072	0.164429	0.152264	0.544929
P47791-2	Glutathione reductase, mitochondrial	Gsr	8	15016000	11643000	14326000	8571800	8483000	18309000	8444100	8821100	7682600	8277100	7643100	7290600	8803000	8676800	5585000	12292000	12389200	7723350	1.60412	0.681784	0.708291	0.0134198	11014300	8839200	1.24607	0.31739	0.373282	0.416991	8839200	7723350	1.14448	0.194689	0.235484	0.569398	11014300	12389200	0.889024	-0.169705	0.050942	0.494915	11014300	7723350	1.4261	0.512079	0.665169	0.158048
Q9Z2U1	Proteasome subunit alpha type-5	Psma5	8	27778000	19916000	20618000	13924000	21000000	31015000	19049000	14773000	16226000	13051000	16017000	14926000	16360000	13501000	10828000	20993000	20559000	15055000	1.36559	0.449527	0.365191	0.104921	21459250	15420500	1.39161	0.47675	0.611716	0.142758	15420500	15055000	1.02428	0.0346068	0.0736652	0.98957	21459250	20559000	1.04379	0.0618296	0.358024	0.863162	21459250	15055000	1.42539	0.511357	0.664104	0.0915991
O70165	Ficolin-1	Fcn1	8	106600000	81066000	88031000	85186000	64305000	73356000	74748000	58662000	92133000	78777000	87669000	48399000	87304000	85565000	69302000	73323000	90220750	76744500	1.1756	0.233396	0.0459117	0.286727	67767750	78873500	0.859195	-0.218942	-0.429173	0.213716	78873500	76744500	1.02774	0.0394773	0.0785885	0.753146	67767750	90220750	0.751133	-0.41286	-0.271552	0.0393449	67767750	76744500	0.883031	-0.179464	-0.355098	0.563244
Q61406	Complement factor H-related 1	Cfhr1	8	45447000	45787000	38649000	29605000	37488000	31456000	28782000	26116000	43994000	36261000	30113000	27076000	39724000	36581000	30494000	28874000	39872000	34361000	1.16039	0.214604	0.0181514	0.355803	30960500	33918250	0.912798	-0.131633	-0.298542	0.493052	33918250	34361000	0.987115	-0.0187103	0.0197698	0.977308	30960500	39872000	0.776497	-0.364947	-0.208005	0.121951	30960500	34361000	0.901036	-0.150343	-0.312134	0.530783
P24549	Retinal dehydrogenase 1;Aldehyde dehydrogenase, cytosolic 1	Aldh1a1	8	3800100	1430700	3692000	966380	2478000	1377400	4363900	576028	587669	501620	5165100	23851000	2495800	721580	343632	3592200	2472295	7.52635e+06	0.328485	-1.6061	-2.67147	0.862742	NA	NA	NA	NA	NA	NA	NA	NA	NA	NA	NA	NA	2198832	2472295	0.889389	-0.169114	0.0517268	0.683019	NA	NA	NA	NA	NA	NA
P14152	Malate dehydrogenase, cytoplasmic	Mdh1	8	21426000	10248000	16656000	11616000	13727000	22573000	8571000	6557600	8823300	4317700	22212000	35110000	15728000	21099000	13582000	18866000	14986500	17615750	0.850744	-0.233202	-0.643368	0.846983	12857150	17318750	0.742383	-0.429764	-0.744603	0.169545	17318750	17615750	0.98314	-0.0245311	0.0138858	0.557916	12857150	14986500	0.857915	-0.221093	-0.0172124	0.462192	12857150	17615750	0.729867	-0.454295	-0.760569	0.787963
P39039	Mannose-binding protein A	Mbl1	8	179510000	339800000	279250000	216880000	253800000	155900000	207750000	193540000	245410000	229870000	217910000	131360000	253570000	235210000	218620000	151920000	253860000	206137500	1.23151	0.300426	0.144932	0.320315	202747500	214830000	0.943758	-0.0835113	-0.226543	0.73652	214830000	206137500	1.04217	0.0595885	0.0989179	0.783434	202747500	253860000	0.798659	-0.324349	-0.15416	0.260322	202747500	206137500	0.983555	-0.0239229	-0.12562	0.983762
P97333	Neuropilin-1	Nrp1	8	5878600	5464600	5889000	3777600	17055000	5756400	4303900	3118700	3698900	4404500	7353900	6594400	5414700	7927500	2211700	2794900	5252450	5512925	0.952752	-0.0698275	-0.402023	0.898438	7558500	4587200	1.64774	0.720486	0.976391	0.360888	4587200	5512925	0.832081	-0.265204	-0.229398	0.40078	7558500	5252450	1.43904	0.525109	0.972466	0.665402	7558500	5512925	1.37105	0.455282	0.581374	0.733115
Q61171	Peroxiredoxin-2	Prdx2	8	27534000	3760100	20714000	19637000	16005000	35608000	44989000	15675000	9048100	3833900	52096000	58647000	29000000	19837000	9995300	35739000	17911275	30906250	0.579536	-0.787031	-1.46151	0.756872	28069250	23642825	1.18722	0.247588	0.268845	0.640715	23642825	30906250	0.764985	-0.386496	-0.352005	0.804059	28069250	17911275	1.56713	0.648122	1.13562	0.254889	28069250	30906250	0.908206	-0.138908	-0.295263	0.614176
Q9ET66	Peptidase inhibitor 16	Pi16	8	116390000	89947000	96888000	74987000	115260000	118230000	110250000	59270000	63881000	68413000	117300000	82414000	109350000	133670000	84675000	94468000	94553000	83002000	1.13917	0.187977	-0.021183	0.402763	100752500	105540750	0.954631	-0.0669845	-0.201816	0.725608	105540750	83002000	1.27154	0.346582	0.389024	0.170022	100752500	94553000	1.06557	0.0916205	0.397535	0.837476	100752500	83002000	1.21386	0.279598	0.322178	0.394939
Q9R182	Angiopoietin-related protein 3	Angptl3	8	5428800	6148700	4686500	5299200	6791600	5638600	7910000	13096000	8318900	7368800	3486700	3056700	4452100	4528800	8082800	3425100	5390800	5557775	0.969957	-0.044008	-0.363882	0.814192	8359050	5122200	1.63193	0.706575	0.955578	0.0712982	5122200	5557775	0.921628	-0.117744	-0.080338	0.894443	8359050	5390800	1.55061	0.63284	1.11535	0.0681478	8359050	5557775	1.50403	0.588832	0.778406	0.154656
Q6GT24	Peroxiredoxin-6	Prdx6	8	8498900	4003500	6757700	6577600	6582000	4843400	8353100	3504000	2919900	501620	10964000	21373000	5808600	5900200	2629800	9409700	6459425	8939630	0.722561	-0.468809	-0.991418	0.634451	5820625	5937075	0.980386	-0.0285783	-0.144353	0.936823	5937075	8939630	0.66413	-0.590463	-0.558184	0.776494	5820625	6459425	0.901106	-0.150232	0.0767696	0.61372	5820625	8939630	0.651104	-0.619041	-1.00363	0.745249
P31532	Serum amyloid A-4 protein	Saa4	8	358300000	792480000	640180000	500910000	540820000	332380000	565920000	613240000	632470000	571270000	484930000	314480000	709830000	602500000	511120000	269970000	572967500	500787500	1.14413	0.194255	-0.0119094	0.582474	513090000	523355000	0.980386	-0.028578	-0.144352	0.954136	523355000	500787500	1.04506	0.0635913	0.102964	0.945729	513090000	572967500	0.895496	-0.159241	0.0648201	0.663459	513090000	500787500	1.02457	0.0350134	-0.0386687	0.881618
P14847	C-reactive protein	Crp	8	344580000	376520000	399160000	392570000	400140000	313180000	455120000	386560000	432870000	357000000	451730000	289730000	373230000	450180000	367070000	265990000	378207500	382832500	0.987919	-0.0175353	-0.324775	0.991996	388750000	364117500	1.06765	0.0944386	0.0397043	0.624036	364117500	382832500	0.951114	-0.0723092	-0.0344105	0.74258	388750000	378207500	1.02787	0.0396647	0.328627	0.867024	388750000	382832500	1.01546	0.0221294	-0.0576771	0.884561
Q9R111	Guanine deaminase	Gda	8	6342700	4534100	6910300	5579300	6982900	9476100	8033700	5346400	3796300	2167900	6429700	10139000	7076300	5183900	2650700	9147200	5841600	5633225	1.03699	0.0524025	-0.22146	0.582212	7459775	6014525	1.24029	0.310681	0.363245	0.307529	6014525	5633225	1.06769	0.0944897	0.134198	0.751221	7459775	5841600	1.27701	0.352769	0.743892	0.177622	7459775	5633225	1.32425	0.405171	0.507443	0.230977
P41317	Mannose-binding protein C	Mbl2	8	165140000	132880000	180220000	133160000	157560000	148630000	121100000	105250000	148760000	109470000	161440000	138220000	135320000	205820000	132520000	129300000	152850000	139472500	1.09591	0.132136	-0.103674	0.494497	133135000	150740000	0.883209	-0.179172	-0.36967	0.463418	150740000	139472500	1.08079	0.112082	0.15198	0.653468	133135000	152850000	0.871017	-0.199227	0.0117881	0.335815	133135000	139472500	0.954561	-0.0670908	-0.189308	0.738003
P46412	Glutathione peroxidase 3	Gpx3	8	1896500000	1039900000	1090600000	918160000	1233500000	1831100000	1369100000	1037100000	860860000	960170000	1291900000	928960000	1171600000	1237700000	1000900000	1279700000	1236290000	1010472500	1.22348	0.290987	0.130988	0.372245	1367700000	1172475000	1.16651	0.222195	0.230852	0.367501	1172475000	1010472500	1.16032	0.214527	0.255537	0.234723	1367700000	1236290000	1.10629	0.145735	0.469306	0.550386	1367700000	1010472500	1.35353	0.436722	0.553991	0.101173
Q80YX1-2	Tenascin	Tnc	8	6797600	6282300	6374900	4064600	6816100	7539000	5744800	5792500	5833500	3866100	8224400	5279400	5821800	5832900	5909800	5546300	5879850	5800850	1.01362	0.019515	-0.270043	0.876848	6473100	5777700	1.12036	0.163961	0.143724	0.340034	5777700	5800850	0.996009	-0.00576902	0.0328514	0.845547	6473100	5879850	1.1009	0.138677	0.459946	0.483012	6473100	5800850	1.11589	0.158192	0.143063	0.443605
Q9Z0K8	Pantetheinase	Vnn1	8	641524	24578000	9897400	14526000	9881100	1599900	8909900	4607100	7221500	17391000	9466900	12783000	12036000	16316000	6182900	397664	12410731	11715600	1.05933	0.0831573	-0.176028	0.540547	6249500	8.73314e+06	0.715607	-0.48276	-0.823895	0.929893	8.73314e+06	11715600	0.745428	-0.423858	-0.389773	0.295556	6249500	12410731	0.503556	-0.989775	-1.03671	0.701685	6249500	11715600	0.533434	-0.906618	-1.4279	0.0907899
Q6P8U6	Pancreatic triacylglycerol lipase	Pnlip	8	641524	617507	325894	427232	299513	415732	513831	576028	587669	501620	456769	530222	387778	324417	343632	397664	NA	NA	NA	NA	NA	NA	NA	NA	NA	NA	NA	NA	NA	NA	NA	NA	NA	NA	NA	NA	NA	NA	NA	NA	NA	NA	NA	NA	NA	NA
P50247	Adenosylhomocysteinase	Ahcy	8	5387100	617507	2136000	427232	2600900	3310900	1764700	576028	587669	501620	2514900	21981000	1625300	787250	343632	3243400	NA	NA	NA	NA	NA	NA	NA	NA	NA	NA	NA	NA	NA	NA	NA	NA	NA	NA	NA	NA	NA	NA	NA	NA	NA	NA	NA	NA	NA	NA
P16882-2	Growth hormone receptor;Growth hormone-binding protein	Ghr	7	14043000	12809000	12854000	10917000	9790900	8453500	9829700	7037200	10641000	14096000	9851900	9053500	8274000	7505000	8485100	7400400	12655750	10910600	1.15995	0.214063	0.0173516	0.245966	8777825	7916125	1.10885	0.149069	0.121442	0.428968	7916125	10910600	0.725544	-0.462864	-0.429202	0.0342511	8777825	12655750	0.693584	-0.527858	-0.424071	0.0162341	8777825	10910600	0.804523	-0.313795	-0.553282	0.17208
P35505	Fumarylacetoacetase	Fah	7	19194000	14722000	15651000	8234400	4823300	6535300	4592700	3939400	4639500	10671000	6006100	12022000	5876300	6074300	3097900	5951100	14450350	8334650	1.73377	0.793911	0.87393	0.0653388	4972675	5249900	0.947194	-0.0782678	-0.218698	0.85483	5249900	8334650	0.629888	-0.666832	-0.635382	0.143449	4972675	14450350	0.344121	-1.53901	-1.76515	0.000823989	4972675	8334650	0.596627	-0.745099	-1.18961	0.0888805
Q9QXF8	Glycine N-methyltransferase	Gnmt	7	18945000	4431400	7268600	2714900	1987700	2074200	513831	576028	587669	3082000	1991000	23678000	933780	1720700	883090	2716700	8339975	7.33467e+06	1.13706	0.185312	-0.0251207	0.368789	1.28794e+06	1.56357e+06	0.823719	-0.279776	-0.520193	0.501305	1.56357e+06	7.33467e+06	0.213175	-2.22989	-2.21539	0.315424	1.28794e+06	8339975	0.15443	-2.69498	-3.29829	0.00600392	NA	NA	NA	NA	NA	NA
O09043	Napsin-A	Napsa	7	16536000	14210000	15189000	15341000	12194000	12451000	10553000	8395700	7783300	8675200	15287000	10193000	10761000	10118000	9272900	13314000	15319000	10484625	1.46109	0.547047	0.509251	0.0309992	10898425	10866475	1.00294	0.00423564	-0.0952566	0.998973	10866475	10484625	1.03642	0.0516088	0.0908516	0.723956	10898425	15319000	0.711432	-0.491202	-0.375456	0.0214022	10898425	10484625	1.03947	0.0558444	-0.00793572	0.736629
E9QQ18	Proteoglycan 4;Proteoglycan 4 C-terminal part	Prg4	7	15125000	29712000	19258000	15335000	14827000	11002000	14179000	13069000	12300000	14004000	13553000	6514100	13084000	13577000	9245800	7272000	19857500	11592775	1.71292	0.776458	0.848147	0.0450373	13269250	10794700	1.22924	0.297764	0.343918	0.196977	10794700	11592775	0.931158	-0.102903	-0.0653359	0.791404	13269250	19857500	0.668224	-0.581597	-0.495345	0.0641104	13269250	11592775	1.14461	0.194861	0.197162	0.392283
P04117	Fatty acid-binding protein, adipocyte	Fabp4	7	32451000	21692000	13726000	9369900	299513	415732	513831	576028	587669	501620	11245000	7583700	3701200	9184800	343632	4850100	19309725	4.9795e+06	3.87785	1.95526	2.58952	0.0298692	NA	NA	NA	NA	NA	NA	NA	NA	NA	NA	NA	NA	451276	19309725	0.0233704	-5.41917	-6.91136	8.05622e-07	NA	NA	NA	NA	NA	NA
P04247	Myoglobin	Mb	7	113350000	24535000	70823000	27571000	54596000	95914000	16458000	25472000	50718000	160430	71008000	118700000	84248000	93608000	75134000	102430000	59069750	6.01466e+07	0.982096	-0.0260639	-0.337374	0.461221	48110000	88855000	0.541444	-0.885116	-1.4259	0.0457826	88855000	6.01466e+07	1.47731	0.56297	0.607759	0.250955	48110000	59069750	0.814461	-0.296083	-0.116671	0.643233	48110000	6.01466e+07	0.799879	-0.322147	-0.565604	0.550773
Q01149	Collagen alpha-2(I) chain	Col1a2	7	9593300	13407000	14148000	7226200	17592000	19515000	14358000	8943500	7809500	7296900	23092000	15433000	9685500	16855000	17811000	15813000	11093625	13407850	0.827398	-0.273347	-0.702672	0.720925	15102125	15041125	1.00406	0.00583909	-0.0928576	0.96133	15041125	13407850	1.12181	0.165835	0.206316	0.494689	15102125	11093625	1.36133	0.445021	0.866245	0.205926	15102125	13407850	1.12636	0.171674	0.162953	0.534533
P13597-2	Intercellular adhesion molecule 1	Icam1	7	33526000	21180000	24325000	18544000	18344000	24669000	19905000	15954000	14423000	16173000	21020000	14003000	20075000	22836000	15477000	17939000	24393750	16404750	1.48699	0.572398	0.546701	0.0449671	19718000	19081750	1.03334	0.0473197	-0.0307945	0.831188	19081750	16404750	1.16318	0.21808	0.259128	0.288046	19718000	24393750	0.808322	-0.306998	-0.131148	0.252274	19718000	16404750	1.20197	0.2654	0.301231	0.239205
P99026	Proteasome subunit beta type-4	Psmb4	7	33545000	19324000	20406000	12768000	17906000	26830000	16259000	11589000	14335000	12604000	13427000	9559400	17674000	10697000	9668900	21414000	21510750	12481350	1.72343	0.785284	0.861185	0.0456169	18146000	14863475	1.22085	0.28788	0.32913	0.405099	14863475	12481350	1.19085	0.251997	0.293414	0.537904	18146000	21510750	0.843578	-0.245406	-0.0494593	0.53871	18146000	12481350	1.45385	0.539878	0.706182	0.114389
A0A6I8MX27	L-lactate dehydrogenase B chain;L-lactate dehydrogenase	Ldhb	7	12218000	2891200	6756000	4037400	5005100	11390000	3836200	4044100	3850500	2312000	8390900	11565000	7322300	9793600	7251300	10117000	6475650	6529600	0.991738	-0.0119696	-0.316553	0.951505	6068850	8621050	0.703957	-0.50644	-0.859326	0.106927	8621050	6529600	1.3203	0.400869	0.4439	0.223838	6068850	6475650	0.93718	-0.0936018	0.151877	0.953615	6068850	6529600	0.929437	-0.105571	-0.24608	0.988564
P70428	Exostosin-2	Ext2	7	5442400	3303000	4058100	3462000	3029000	3953500	3595800	2645800	3759700	4709200	3450300	3218100	5512400	5938400	3809400	4735000	4066375	3784325	1.07453	0.103707	-0.14567	0.683737	3306025	4998800	0.661364	-0.596484	-0.994049	0.0209556	4998800	3784325	1.32092	0.401546	0.444584	0.08323	3306025	4066375	0.813015	-0.298646	-0.12007	0.23149	3306025	3784325	0.87361	-0.194938	-0.377928	0.357874
P12710	Fatty acid-binding protein, liver	Fabp1	7	1294300	2910500	520940	2802100	10319000	720950	185560	1012100	998920	501620	2561800	177610000	274800	199440	158970	6806900	1881960	45418085	0.0414364	-4.59296	-7.0838	0.468392	3.0594e+06	1.86003e+06	1.64482	0.717926	0.972561	0.470827	1.86003e+06	45418085	0.0409535	-4.60987	-4.62119	0.179594	3.0594e+06	1881960	1.62565	0.701014	1.20577	0.679301	3.0594e+06	45418085	0.0673609	-3.89195	-5.8323	0.376105
Q9R1P0	Proteasome subunit alpha type-4;Proteasome subunit alpha type	Psma4	7	27812000	19346000	17467000	13438000	18983000	34968000	18349000	13458000	10962000	12740000	16951000	6323800	14108000	16626000	10988000	18840000	19515750	11744200	1.66174	0.73269	0.783492	0.0588952	21439500	15140500	1.41604	0.501858	0.649282	0.198217	15140500	11744200	1.28919	0.366464	0.409122	0.226708	21439500	19515750	1.09857	0.135632	0.455907	0.786785	21439500	11744200	1.82554	0.868323	1.19075	0.0550579
Q9CQW3	Vitamin K-dependent protein Z	Proz	7	174600000	226000000	233780000	184750000	219630000	116540000	206930000	140030000	211280000	171860000	194200000	138860000	201480000	195690000	171460000	114040000	204782500	179050000	1.14372	0.19373	-0.0126847	0.323	170782500	170667500	1.00067	0.000971796	-0.10014	0.961461	170667500	179050000	0.953183	-0.0691742	-0.0312415	0.721607	170782500	204782500	0.83397	-0.261932	-0.0713775	0.260013	170782500	179050000	0.953826	-0.0682024	-0.190948	0.709257
P10649	Glutathione S-transferase Mu 1	Gstm1	7	9122700	4844300	6249300	2763100	7967300	7038500	513831	2008500	3425700	2608200	7326200	45201000	4623000	324417	3066800	8152600	5744850	14640275	0.3924	-1.3496	-2.29256	0.597453	NA	NA	NA	NA	NA	NA	4.0417e+06	14640275	0.276068	-1.85691	-1.83837	0.233447	4.38203e+06	5744850	0.762776	-0.390669	-0.242119	0.310077	4.38203e+06	14640275	0.299314	-1.74027	-2.65783	0.250827
Q3TVK3	Aspartyl aminopeptidase	Dnpep	7	8801300	2774900	6981900	427232	4836900	11741000	5531200	4014100	6402800	4673900	3948100	5507000	6308400	4508200	3760000	9219000	4.74633e+06	5132950	0.924679	-0.112975	-0.465763	0.404176	6530800	5948900	1.09782	0.134637	0.0998485	0.830261	5948900	5132950	1.15896	0.212835	0.253826	0.638246	6530800	4.74633e+06	1.37597	0.460446	0.886704	0.288967	6530800	5132950	1.27233	0.347472	0.422316	0.513207
P49722	Proteasome subunit alpha type-2	Psma2	7	15360000	9352200	11995000	7932700	10270000	20720000	11592000	8301800	6777000	7967300	9655300	9043000	8562900	9234000	5949600	13065000	11159975	8360650	1.33482	0.416647	0.316618	0.150125	12720950	9202875	1.38228	0.46705	0.597202	0.235208	9202875	8360650	1.10074	0.13847	0.178654	0.717766	12720950	11159975	1.13987	0.188873	0.526519	0.668821	12720950	8360650	1.52153	0.605519	0.803026	0.110669
Q9CZB2	Melanocyte protein PMEL;M-alpha;M-beta	Pmel	7	6616200	8196300	3516100	2369200	5749700	34744000	3027500	2744900	3628300	2393100	10915000	6651800	15788000	64706000	2511500	2204900	5174450	5897050	0.877464	-0.188588	-0.577462	0.839099	11566525	21302600	0.542963	-0.881074	-1.41985	0.730648	21302600	5897050	3.61242	1.85296	1.91175	0.49881	11566525	5174450	2.23531	1.16048	1.81515	0.581419	11566525	5897050	1.96141	0.97189	1.34355	0.694774
P58252	Elongation factor 2	Eef2	7	2804100	452780	311460	1023200	1358400	2278600	11370000	336590	587669	501620	1519700	2110000	1324300	1723000	470490	2067000	1147885	1.17975e+06	0.972992	-0.0394998	-0.357222	0.70391	3.8359e+06	1.3962e+06	2.74739	1.45806	2.07995	0.560529	1.3962e+06	1.17975e+06	1.18347	0.243025	0.284344	0.635953	3.8359e+06	1147885	3.34171	1.74059	2.58454	0.294805	3.8359e+06	1.17975e+06	3.25146	1.70109	2.41937	0.39825
P21180	Complement C2;Complement C2b fragment;Complement C2a fragment	C2	7	72298000	49510000	41973000	33947000	31075000	52210000	32465000	28918000	37391000	32673000	37313000	25184000	50491000	36201000	31709000	48157000	49432000	33140250	1.4916	0.576861	0.553293	0.0768067	36167000	41639500	0.868574	-0.203279	-0.405738	0.409508	41639500	33140250	1.25646	0.329368	0.371624	0.180803	36167000	49432000	0.731652	-0.450771	-0.321832	0.170505	36167000	33140250	1.09133	0.126089	0.0957002	0.686241
Q9EQH2	Endoplasmic reticulum aminopeptidase 1	Erap1	7	8246100	7974800	7182600	7517600	5557700	5478500	9262100	5051500	6038400	3693500	7879300	4622900	7105000	9937100	5962100	6144100	7730275	5558525	1.39071	0.475818	0.404028	0.0614567	6337450	7287075	0.869684	-0.201437	-0.402983	0.428453	7287075	5558525	1.31097	0.390638	0.433558	0.176475	6337450	7730275	0.819822	-0.286617	-0.104117	0.172095	6337450	5558525	1.14013	0.1892	0.188811	0.518252
Q01853	Transitional endoplasmic reticulum ATPase	Vcp	7	2628100	1584600	1444300	3313900	3073000	6056800	7874400	3384000	629160	1391400	15182000	19375000	1808100	1764500	2293700	4970100	2242725	9144390	0.245257	-2.02763	-3.29418	0.437818	5097050	2709100	1.88146	0.911849	1.26271	0.0591965	2709100	9144390	0.296258	-1.75507	-1.73543	0.552563	5097050	2242725	2.2727	1.18441	1.84689	0.0186516	5097050	9144390	0.557396	-0.843224	-1.33437	0.837996
P28666	Murinoglobulin-2	Mug2	7	17413000	14925000	19427000	9020500	29810000	16194000	20968000	13518000	19051000	9897800	19717000	12398000	18153000	10667000	19698000	17712000	15196375	15265950	0.995442	-0.00659015	-0.308607	0.989728	20122500	16557500	1.21531	0.281325	0.319322	0.423293	16557500	15265950	1.0846	0.117167	0.157121	0.658919	20122500	15196375	1.32416	0.405082	0.813275	0.257927	20122500	15265950	1.31813	0.398492	0.497589	0.266942
P10810	Monocyte differentiation antigen CD14	Cd14	7	5476200	5106800	5401100	4800800	4401700	5208000	6707900	5747900	3424400	3189000	4921400	4043700	5238600	4921200	4721100	5060100	5196225	3894625	1.3342	0.415979	0.315632	0.0385254	5516375	4985250	1.10654	0.146055	0.116932	0.466247	4985250	3894625	1.28003	0.356181	0.398728	0.0598007	5516375	5196225	1.06161	0.0862566	0.390421	0.695965	5516375	3894625	1.41641	0.502236	0.650647	0.0430388
Q3KQQ2	Major urinary protein 3	Mup3	7	11254000	21324000	23239000	15104000	25993000	11098000	18844000	16167000	25513000	20069000	22654000	18292000	34940000	16086000	26292000	9703100	17730250	21632000	0.819631	-0.286954	-0.722773	0.236847	18025500	21755275	0.828558	-0.271326	-0.50755	0.692508	21755275	21632000	1.0057	0.0081982	0.0469701	0.724965	18025500	17730250	1.01665	0.0238264	0.307621	0.963941	18025500	21632000	0.833279	-0.263128	-0.478531	0.278388
Q9DC42	CD97 antigen	Adgre5;Cd97	7	7416900	6692300	9125900	6963500	8857600	6676900	9318600	6648100	6885500	6682500	11748000	6460000	5975200	8389700	6950500	7384300	7549650	7944000	0.950359	-0.0734559	-0.407384	0.87896	7875300	7174925	1.09761	0.134371	0.099451	0.522474	7174925	7944000	0.903188	-0.146902	-0.109812	0.647951	7875300	7549650	1.04313	0.0609251	0.356824	0.787117	7875300	7944000	0.991352	-0.0125307	-0.108813	0.946142
Q61805	Lipopolysaccharide-binding protein	Lbp	7	17143000	27214000	17504000	16208000	15700000	16893000	16490000	14155000	12774000	19936000	17776000	10103000	23767000	28269000	14776000	17269000	19517250	15147250	1.2885	0.365694	0.241348	0.203985	15809500	21020250	0.752108	-0.410988	-0.716511	0.145291	21020250	15147250	1.38773	0.472724	0.516534	0.146804	15809500	19517250	0.810027	-0.303958	-0.127116	0.216849	15809500	15147250	1.04372	0.0617358	0.00075622	0.661378
E9PZ16	Basement membrane-specific heparan sulfate proteoglycan core protein;Endorepellin;LG3 peptide	Hspg2	7	11339000	8706000	8754600	7430600	10118000	10411000	10779000	5659100	9056600	10262000	9804000	6960900	6986800	13306000	9862200	8625700	9057550	9020875	1.00407	0.00585349	-0.290224	0.982377	9241775	9695175	0.953234	-0.069097	-0.204976	0.79803	9695175	9020875	1.07475	0.104	0.143811	0.742887	9241775	9057550	1.02034	0.0290491	0.314547	0.999348	9241775	9020875	1.02449	0.0349026	-0.0388322	0.985906
P13634	Carbonic anhydrase 1	Ca1	7	16114000	3008400	13961000	15955000	10978000	22637000	40626000	9015200	7331300	1362000	37471000	39441000	17435000	13478000	3190700	25595000	12259600	21401325	0.572843	-0.803788	-1.48626	0.924484	20814050	14924675	1.39461	0.479858	0.616366	0.45609	14924675	21401325	0.697372	-0.520001	-0.486958	0.93772	20814050	12259600	1.69778	0.763646	1.28883	0.285842	20814050	21401325	0.972559	-0.0401424	-0.14955	0.567269
Q91X79	Chymotrypsin-like elastase family member 1	Cela1	7	18333000	8937600	12765000	8057100	23898000	11129000	12663000	7996900	12553000	8960200	11918000	7374100	11179000	11321000	8807400	13927000	12023175	10201325	1.17859	0.237061	0.0513265	0.552231	13921725	11308600	1.23107	0.299918	0.34714	0.565641	11308600	10201325	1.10854	0.148664	0.188959	0.498714	13921725	12023175	1.15791	0.21152	0.556556	0.674681	13921725	10201325	1.3647	0.448581	0.571488	0.335805
O35490	Betaine--homocysteine S-methyltransferase 1	Bhmt	6	5375300	9328100	8654000	3488600	2268700	415732	513831	1507000	1896200	6447000	456769	45265000	387778	2202200	343632	3064000	6711500	1.35162e+07	0.496551	-1.00999	-1.79087	0.628452	NA	NA	NA	NA	NA	NA	NA	NA	NA	NA	NA	NA	1.17632e+06	6711500	0.175269	-2.51236	-3.05609	0.00160185	NA	NA	NA	NA	NA	NA
G3X9D6	Apolipoprotein N	Apon	6	311310000	324700000	349960000	283810000	278260000	171840000	291970000	166330000	262640000	250360000	259000000	207750000	268670000	149730000	214890000	182830000	317445000	244937500	1.29602	0.374093	0.253756	0.035063	227100000	204030000	1.11307	0.154546	0.129637	0.625386	204030000	244937500	0.832988	-0.263632	-0.227809	0.198853	227100000	317445000	0.7154	-0.483179	-0.364814	0.0546979	227100000	244937500	0.927175	-0.109086	-0.251265	0.545812
O09173	Homogentisate 1,2-dioxygenase	Hgd	6	7837200	3202800	5015800	2361500	299513	2158900	1976600	1865900	2089700	2263400	2315300	8416300	387778	2017100	343632	2312900	4604325	3771175	1.22093	0.287976	0.126539	0.468465	NA	NA	NA	NA	NA	NA	1.26535e+06	3771175	0.335533	-1.57547	-1.55388	0.052492	1.57523e+06	4604325	0.342119	-1.54743	-1.77632	0.0336475	1.57523e+06	3771175	0.417702	-1.25945	-1.94846	0.113047
P11087	Collagen alpha-1(I) chain	Col1a1	6	9636500	12565000	12121000	4466800	20200000	22298000	15736000	7701800	13152000	7578200	32281000	14424000	11535000	16568000	23580000	17284000	9697325	16858800	0.575208	-0.797843	-1.47748	0.199699	16483950	17241750	0.956049	-0.0648442	-0.198613	0.738018	17241750	16858800	1.02272	0.0324044	0.0714389	0.681489	16483950	9697325	1.69985	0.765403	1.29116	0.119837	16483950	16858800	0.977765	-0.0324399	-0.138186	0.909338
P16406	Glutamyl aminopeptidase	Enpep	6	7269500	6345800	7862900	3366600	3122700	4200100	4352000	2343400	3824800	5154100	3991000	4339900	4443700	3564500	3183700	4610200	6211200	4327450	1.4353	0.521355	0.471298	0.147205	3504550	3950525	0.88711	-0.172815	-0.360159	0.440375	3950525	4327450	0.912899	-0.131473	-0.0942158	0.467647	3504550	6211200	0.564231	-0.825643	-0.81902	0.0395329	3504550	4327450	0.809842	-0.304288	-0.539256	0.195195
Q9Z2L6	Multiple inositol polyphosphate phosphatase 1	Minpp1	6	13475000	10012000	10259000	8470400	8971300	10333000	6819500	7496800	6856800	7302300	8466800	7529600	7191900	9330800	8421800	8747400	10554100	7538875	1.39996	0.485382	0.418157	0.0315272	8405150	8422975	0.997884	-0.00305632	-0.106167	0.936367	8422975	7538875	1.11727	0.159981	0.200399	0.312642	8405150	10554100	0.796387	-0.328458	-0.15961	0.161193	8405150	7538875	1.11491	0.156924	0.141192	0.461209
P63101	14-3-3 protein zeta/delta	Ywhaz	6	5681800	4573200	6880800	4198900	4072800	6902000	6310600	3272500	2494300	4696200	8206500	5239400	4660300	4561500	2762000	4593900	5333675	5159100	1.03384	0.0480105	-0.227948	0.702642	5139475	4144425	1.24009	0.310449	0.362897	0.382259	4144425	5159100	0.803323	-0.315947	-0.280691	0.560317	5139475	5333675	0.96359	-0.0535089	0.205052	0.758009	5139475	5159100	0.996196	-0.00549842	-0.0984377	0.901808
P18242	Cathepsin D	Ctsd	6	17160000	8599000	8491400	8239500	6445600	8564900	10136000	6726400	5676400	8418400	8451400	4835900	5976000	324417	7577500	9521100	10622475	6845525	1.55174	0.633887	0.637535	0.0921975	7968225	5.84975e+06	1.36215	0.445882	0.565532	0.267191	5.84975e+06	6845525	0.854537	-0.226785	-0.190562	0.383668	7968225	10622475	0.750129	-0.41479	-0.27411	0.241507	7968225	6845525	1.164	0.219097	0.232919	0.385816
P09103	Protein disulfide-isomerase	P4hb	6	2918300	3157700	2379800	2223400	5437100	3971600	1650700	1609400	1188900	2262900	2656400	2371600	2728100	2244700	1882600	1934300	2669800	2119950	1.25937	0.332701	0.19261	0.21206	3167200	2197425	1.44132	0.527394	0.687489	0.436681	2197425	2119950	1.03655	0.0517837	0.0910284	0.732609	3167200	2669800	1.18631	0.246476	0.602918	0.891589	3167200	2119950	1.494	0.579178	0.764163	0.37544
Q9CZT5	Vasorin	Vasn	6	5255700	4022300	4367200	4588700	4633200	6391000	6426000	3225400	3043600	2482800	3409400	3980900	5811700	6415800	4141500	5657500	4558475	3229175	1.41165	0.497386	0.435889	0.0265635	5168900	5506625	0.938669	-0.0913111	-0.238213	0.645218	5506625	3229175	1.70527	0.770003	0.817038	0.00642918	5168900	4558475	1.13391	0.181306	0.516484	0.60952	5168900	3229175	1.60069	0.678692	0.910981	0.046371
Q60994	Adiponectin	Adipoq	6	2004400000	1024300000	1109800000	1171700000	641090000	1336500000	1076500000	631580000	1077800000	1228500000	1026900000	659570000	976280000	977010000	648290000	1351000000	1327550000	998192500	1.32995	0.411376	0.308832	0.206298	921417500	988145000	0.932472	-0.100868	-0.252511	0.698765	988145000	998192500	0.989934	-0.0145953	0.0239294	0.929886	921417500	1327550000	0.694074	-0.526839	-0.42272	0.131267	921417500	998192500	0.923086	-0.115463	-0.260674	0.638854
A0A0R4J0H5	N-acetylglucosamine-1-phosphotransferase subunit gamma	Gnptg	6	7382800	8373800	6733000	8021800	8029700	6135300	7911800	5699700	8549900	7126500	7316900	5009900	6940500	6751400	7188800	5955700	7627850	7000800	1.08957	0.123757	-0.116052	0.480447	6944125	6709100	1.03503	0.0496737	-0.0272726	0.838812	6709100	7000800	0.958333	-0.0614005	-0.0233835	0.844659	6944125	7627850	0.910365	-0.135484	0.0963298	0.441637	6944125	7000800	0.991904	-0.0117269	-0.107627	0.993265
P17182	Alpha-enolase	Eno1	6	10002000	7178800	8915100	7272400	7488900	7066900	6440200	4658100	5829600	5387300	12486000	24437000	7049300	7368700	5713800	8425300	8342075	12034975	0.693153	-0.528755	-1.07997	0.602963	6413525	7139275	0.898344	-0.15466	-0.332995	0.454207	7139275	12034975	0.593211	-0.753384	-0.722872	0.341322	6413525	8342075	0.768817	-0.379289	-0.227026	0.103536	6413525	12034975	0.532907	-0.908044	-1.43001	0.21746
O09061	Proteasome subunit beta type-1	Psmb1	6	18299000	13282000	10946000	8328000	11818000	15845000	13349000	8184200	8549300	5952100	9061700	6147000	9344100	7544400	5525000	16803000	12713750	7427525	1.71171	0.775436	0.846638	0.0298669	12299050	9804125	1.25448	0.327086	0.38779	0.287477	9804125	7427525	1.31997	0.400507	0.443535	0.41234	12299050	12713750	0.967382	-0.0478427	0.212567	0.92573	12299050	7427525	1.65587	0.727593	0.983128	0.0249771
P11352	Glutathione peroxidase 1;Glutathione peroxidase	Gpx1	6	14087000	10129000	14615000	7344600	10759000	18148000	16438000	6208100	587669	6741700	22262000	28554000	11939000	16525000	8984300	21585000	11543900	1.45363e+07	0.794141	-0.332534	-0.790105	0.589449	12888275	14758325	0.873288	-0.19547	-0.394054	0.576117	14758325	1.45363e+07	1.01527	0.0218647	0.0607849	0.422774	12888275	11543900	1.11646	0.158928	0.486805	0.81142	12888275	1.45363e+07	0.886624	-0.173605	-0.346454	0.53892
A2AI62	Hephaestin	Heph	6	8033600	4541500	3849900	4366500	3913600	4698400	4684000	3776000	4038100	3866200	5954700	3635800	4393500	4112100	2479500	5929900	5197875	4373700	1.18844	0.249068	0.0690627	0.46315	4268000	4228750	1.00928	0.0133289	-0.0816514	0.791799	4228750	4373700	0.966859	-0.048623	-0.0104674	0.775059	4268000	5197875	0.821105	-0.284362	-0.101125	0.390394	4268000	4373700	0.975833	-0.0352941	-0.142397	0.947684
Q9DC11	Plexin domain-containing protein 2	Plxdc2	6	14544000	14065000	14391000	10810000	10444000	14529000	13887000	10035000	12810000	13932000	13398000	11081000	12904000	13362000	10651000	12630000	13452500	12805250	1.05055	0.0711389	-0.193782	0.693157	12223750	12386750	0.986841	-0.0191108	-0.130187	0.861245	12386750	12805250	0.967318	-0.0479377	-0.00977466	0.751439	12223750	13452500	0.90866	-0.138187	0.0927438	0.478044	12223750	12805250	0.954589	-0.0670485	-0.189245	0.677616
Q61176	Arginase-1	Arg1	6	640400	1039500	123170	105000	437550	142290	513831	576028	587669	113130	122720	21659000	387778	324417	343632	852920	477018	5.62063e+06	0.084869	-3.55862	-5.55582	0.548504	NA	NA	NA	NA	NA	NA	NA	NA	NA	NA	NA	NA	417425	477018	0.875072	-0.192526	0.0206749	0.74857	NA	NA	NA	NA	NA	NA
Q9WUU7	Cathepsin Z	Ctsz	6	4286200	3082900	3740600	5646600	3309400	4813700	3395200	3300000	3484900	4901000	3654700	3782400	2377600	3859900	3028300	6016300	4189075	3955750	1.05898	0.0826805	-0.176732	0.79344	3704575	3820525	0.969651	-0.0444629	-0.168119	0.939068	3820525	3955750	0.965816	-0.0501804	-0.0120416	0.682804	3704575	4189075	0.884342	-0.177324	0.0408378	0.512124	3704575	3955750	0.936504	-0.0946432	-0.229957	0.626759
Q9Z0L8-2	Gamma-glutamyl hydrolase	Ggh	6	28764000	27027000	28362000	26378000	31597000	30647000	25958000	16952000	31795000	27718000	29206000	28029000	25907000	25638000	29244000	24669000	27632750	29187000	0.946749	-0.0789468	-0.415495	0.556843	26288500	26364500	0.997117	-0.00416481	-0.107825	0.854364	26364500	29187000	0.903296	-0.146729	-0.109638	0.291265	26288500	27632750	0.951353	-0.0719473	0.180597	0.628334	26288500	29187000	0.900692	-0.150894	-0.312947	0.42577
A3KGE4	Noelin	Olfm1	6	21764000	11183000	13861000	10210000	12368000	12095000	15026000	6600000	12401000	6683700	10408000	7135600	11969000	21123000	5458700	14255000	14254500	9157075	1.55667	0.638459	0.644289	0.0815191	11522250	13201425	0.872804	-0.196271	-0.395253	0.820361	13201425	9157075	1.44166	0.527735	0.572142	0.352369	11522250	14254500	0.808324	-0.306995	-0.131144	0.385011	11522250	9157075	1.25829	0.331464	0.398699	0.349822
P10852	4F2 cell-surface antigen heavy chain	Slc3a2	6	13171000	9060900	9215500	8444800	8022100	12956000	5089700	8718500	7932400	9249900	8894100	11143000	8621500	12017000	9465700	12201000	9973050	9304850	1.07181	0.100052	-0.15107	0.663555	8696575	10576300	0.82227	-0.282316	-0.523992	0.269033	10576300	9304850	1.13664	0.18478	0.225467	0.355655	8696575	9973050	0.872008	-0.197587	0.0139622	0.42135	8696575	9304850	0.934628	-0.0975356	-0.234225	0.584239
P98086	Complement C1q subcomponent subunit A	C1qa	6	87908000	40935000	85584000	72402000	74417000	53208000	50819000	51246000	59731000	54030000	77212000	5344300	84124000	107960000	63413000	55148000	71707250	49079325	1.46105	0.547004	0.509187	0.25812	57422500	77661250	0.739397	-0.435579	-0.753303	0.144953	77661250	49079325	1.58236	0.66208	0.707944	0.201712	57422500	71707250	0.800791	-0.320503	-0.149059	0.350068	57422500	49079325	1.16999	0.226501	0.243842	0.382216
E9PZF0	Nucleoside diphosphate kinase;Nucleoside diphosphate kinase B	Gm20390;Nme2	6	10216000	5311200	6623900	4347200	5840200	9085000	4900600	2967100	5667400	3321800	7380800	6021300	5729200	5917700	4891000	7044800	6624575	5597825	1.18342	0.242962	0.0600424	0.52687	5698225	5895675	0.966509	-0.0491444	-0.175123	0.658997	5895675	5597825	1.05321	0.0747906	0.114285	0.659526	5698225	6624575	0.860165	-0.217315	-0.0122026	0.529859	5698225	5597825	1.01794	0.0256462	-0.0524886	0.941099
Q60805	Tyrosine-protein kinase Mer	Mertk	6	21461000	14916000	16063000	14436000	14788000	16337000	15714000	12053000	14656000	14224000	16341000	13050000	16425000	20762000	12420000	14903000	16719000	14567750	1.14767	0.19871	-0.00532717	0.322119	14723000	16127500	0.912913	-0.131451	-0.29827	0.581661	16127500	14567750	1.10707	0.146745	0.187019	0.520023	14723000	16719000	0.880615	-0.183417	0.0327564	0.391665	14723000	14567750	1.01066	0.0152936	-0.0677622	0.951847
P05208	Chymotrypsin-like elastase family member 2A	Cela2a	6	10682000	2922900	8419900	4984900	9594700	5800800	6101700	4717300	7477800	4154800	5788800	4802200	5570800	6424200	3719800	7405800	6752425	5555900	1.21536	0.281385	0.116803	0.729178	6553625	5780150	1.13382	0.181186	0.169495	0.562808	5780150	5555900	1.04036	0.0570863	0.0963885	0.865944	6553625	6752425	0.970559	-0.0431126	0.21884	0.868107	6553625	5555900	1.17958	0.238272	0.261209	0.447643
Q8C165	Probable carboxypeptidase PM20D1	Pm20d1	6	4883000	4773300	4378100	4856100	4836300	5788500	3680500	3522800	4809700	3930800	4631600	2899000	4539100	6550700	3469300	5052600	4722625	4067775	1.16098	0.215349	0.0192521	0.243167	4457025	4902925	0.909054	-0.137562	-0.307413	0.619429	4902925	4067775	1.20531	0.269403	0.311008	0.331203	4457025	4722625	0.94376	-0.0835079	0.165264	0.588592	4457025	4067775	1.09569	0.131841	0.104186	0.612508
Q8R0Y6	Cytosolic 10-formyltetrahydrofolate dehydrogenase	Aldh1l1	6	641524	617507	325894	427232	299513	415732	513831	576028	587669	501620	456769	530222	387778	324417	343632	397664	NA	NA	NA	NA	NA	NA	NA	NA	NA	NA	NA	NA	NA	NA	NA	NA	NA	NA	NA	NA	NA	NA	NA	NA	NA	NA	NA	NA	NA	NA
A0A0R4J0M6	Collectin-11	Colec11	5	20103000	21310000	21322000	22037000	17399000	16121000	18639000	15734000	16507000	15788000	13245000	8616800	12495000	14688000	11718000	12946000	21193000	13539200	1.56531	0.646445	0.656087	0.0158733	16973250	12961750	1.30949	0.389002	0.480428	0.0297713	12961750	13539200	0.95735	-0.062882	-0.024881	0.919697	16973250	21193000	0.800889	-0.320325	-0.148823	0.0541119	16973250	13539200	1.25364	0.32612	0.390815	0.154045
P01837	Immunoglobulinkappa chain C region	Igkc	5	55146000	4330100	3688900	19952000	4405100	6494100	513831	576028	4232000	5690900	7048600	1289300	387778	1366600	1510000	1594600	20779250	4565200	4.55166	2.18639	2.93097	0.140439	NA	NA	NA	NA	NA	NA	1.21474e+06	4565200	0.266088	-1.91003	-1.89206	0.0228571	2.99726e+06	20779250	0.144243	-2.79343	-3.42886	0.0430613	2.99726e+06	4565200	0.656546	-0.607032	-0.985908	0.260756
P27046	Alpha-mannosidase 2	Man2a1	5	3824000	2910600	4002200	2563100	2116100	4251400	2535600	1376000	1220500	3082200	2701000	2208400	2003600	2314400	2334900	2097800	3324975	2303025	1.44374	0.529813	0.483793	0.103012	2569775	2187675	1.17466	0.232244	0.245887	0.724091	2187675	2303025	0.949914	-0.0741316	-0.0362527	0.988249	2569775	3324975	0.77287	-0.371701	-0.216963	0.212178	2569775	2303025	1.11583	0.158112	0.142945	0.775904
Q5MJS3	Extracellular serine/threonine protein kinase FAM20C	Fam20c	5	5787500	7049300	5690900	6177500	3596600	4403200	5428100	2637300	5480400	4968700	4436800	530222	4298400	5403200	4136100	3245800	6176300	3.85403e+06	1.60256	0.680375	0.706209	0.162714	4016300	4270875	0.940393	-0.0886646	-0.234253	0.673424	4270875	3.85403e+06	1.10816	0.148164	0.188454	0.459168	4016300	6176300	0.650276	-0.620876	-0.54744	0.0235098	4016300	3.85403e+06	1.0421	0.059499	-0.00254389	0.555013
Q09200	Beta-1,4 N-acetylgalactosaminyltransferase 1	B4galnt1	5	6234100	4105700	5070100	4235200	2878600	5217000	3897500	3088700	2973200	4310600	4771200	3163400	3060800	4109000	2536800	3512300	4911275	3804600	1.29088	0.368353	0.245276	0.133922	3770450	3304725	1.14093	0.190206	0.182991	0.500811	3304725	3804600	0.868613	-0.203215	-0.166736	0.412711	3770450	4911275	0.767713	-0.381361	-0.229774	0.137523	3770450	3804600	0.991024	-0.0130081	-0.109517	0.927027
Q9R0E2	Procollagen-lysine,2-oxoglutarate 5-dioxygenase 1	Plod1	5	11491000	7594400	5258500	4748600	5620500	6813200	5976500	5236200	3842300	5139300	5733100	3856400	3633700	3780000	3913900	5244200	7273125	4642775	1.56655	0.647588	0.657775	0.0996695	5911600	4142950	1.42691	0.51289	0.665788	0.0187535	4142950	4642775	0.892343	-0.164329	-0.127428	0.460329	5911600	7273125	0.812801	-0.299027	-0.120575	0.477178	5911600	4642775	1.27329	0.348561	0.423924	0.100781
P68373	Tubulin alpha-1C chain;Tubulin alpha-1A chain;Tubulin alpha-1B chain	Tuba1c	5	4531500	4800500	7472400	4203200	4088300	9473700	6022500	5671900	2383200	2625900	5699400	4316500	387778	2733200	2336000	4066800	5251900	3756250	1.39818	0.483546	0.415445	0.145926	6314100	2.38094e+06	2.65193	1.40704	2.00361	0.0338786	2.38094e+06	3756250	0.633862	-0.657759	-0.626211	0.211405	6314100	5251900	1.20225	0.265738	0.628464	0.446633	6314100	3756250	1.68096	0.749284	1.01513	0.0650169
P01887	Beta-2-microglobulin	B2m	5	256060000	441050000	374260000	262690000	222130000	167430000	279620000	210200000	303170000	237180000	228150000	153570000	284540000	265580000	187210000	160410000	333515000	230517500	1.44681	0.532875	0.488316	0.0883223	219845000	224435000	0.979549	-0.029811	-0.146197	0.958161	224435000	230517500	0.973614	-0.0385786	-0.000314032	0.894588	219845000	333515000	0.659176	-0.601265	-0.52143	0.0457393	219845000	230517500	0.953702	-0.0683896	-0.191224	0.846933
O55234	Proteasome subunit beta type-5	Psmb5	5	5289600	3908800	4252200	3431700	4558300	8397100	3212500	3022600	2176900	3183500	2671700	4567700	3745300	2826100	1806700	3404800	4220575	3149950	1.33989	0.422111	0.32469	0.116609	4797625	2945725	1.62867	0.703698	0.951273	0.131314	2945725	3149950	0.935166	-0.0967062	-0.0590721	0.768064	4797625	4220575	1.13672	0.184881	0.521225	0.829221	4797625	3149950	1.52308	0.606991	0.805198	0.195155
P47879	Insulin-like growth factor-binding protein 4	Igfbp4	5	11342000	11851000	12449000	10502000	12171000	8324400	8716100	5486500	11256000	11333000	9503200	10305000	8970100	10265000	10226000	7497800	11536000	10599300	1.08837	0.122174	-0.11839	0.395404	8674500	9239725	0.938827	-0.0910693	-0.237851	0.610014	9239725	10599300	0.87173	-0.198047	-0.161512	0.229209	8674500	11536000	0.75195	-0.411291	-0.269469	0.0945893	8674500	10599300	0.818403	-0.289116	-0.516873	0.207586
Q8HWB2	Histocompatibility 2, Q region locus 4	H2-Q4	5	38067000	28073000	25616000	18068000	19570000	17469000	22889000	23103000	17298000	19556000	29365000	13395000	20895000	21467000	14402000	19079000	27456000	19903500	1.37946	0.464099	0.386717	0.16567	20757750	18960750	1.09477	0.130634	0.0938596	0.48699	18960750	19903500	0.952634	-0.0700061	-0.0320824	0.919469	20757750	27456000	0.756037	-0.403471	-0.259099	0.177496	20757750	19903500	1.04292	0.0606279	-0.000878349	0.67957
Q9EQI5	Chemokine subfamily B Cys-X-Cys	Ppbp	5	20682000	7767100	87195000	60511000	84562000	75272000	23132000	19058000	25794000	611090	617190000	286500000	76633000	98347000	62930000	81813000	44038775	2.32524e+08	0.189395	-2.40053	-3.84504	0.843773	50506000	79930750	0.631872	-0.662296	-1.09252	0.0993262	79930750	2.32524e+08	0.343753	-1.54056	-1.51858	0.645312	50506000	44038775	1.14685	0.19768	0.538201	0.620342	50506000	2.32524e+08	0.217208	-2.20285	-3.3403	0.999066
Q62469	Integrin alpha-2	Itga2	5	2737800	2371400	325894	427232	299513	2726700	2850800	576028	2801200	501620	2398400	530222	2534000	2260600	2175700	2757800	NA	NA	NA	NA	NA	NA	1.61326e+06	2432025	0.66334	-0.592179	-0.987607	0.139292	2432025	1.55786e+06	1.56113	0.642592	0.688245	0.119229	NA	NA	NA	NA	NA	NA	NA	NA	NA	NA	NA	NA
Q08879-2	Fibulin-1	Fbln1	5	26784000	10284000	12976000	9320000	12727000	15972000	8982700	8046900	14082000	14138000	8501700	1168900	7444300	6892300	12789000	9340100	14841000	9472650	1.56672	0.647748	0.658012	0.252466	11432150	9116425	1.25402	0.326557	0.386997	0.307418	9116425	9472650	0.962394	-0.0552999	-0.0172167	0.616626	11432150	14841000	0.770309	-0.376492	-0.223316	0.456095	11432150	9472650	1.20686	0.271257	0.309872	0.381315
P51910	Apolipoprotein D	Apod	5	65432000	55301000	81901000	65590000	100780000	67633000	102460000	80084000	70256000	66017000	93748000	60699000	109070000	93633000	87249000	60365000	67056000	72680000	0.92262	-0.116192	-0.470515	0.591396	87739250	87579250	1.00183	0.00263328	-0.0976541	0.95382	87579250	72680000	1.205	0.269031	0.310632	0.298407	87739250	67056000	1.30845	0.387856	0.790428	0.101641	87739250	72680000	1.2072	0.271664	0.310473	0.246414
Q8BHN3-2	Neutral alpha-glucosidase AB	Ganab	5	6307100	3720200	5064400	3296500	3547500	4884200	4179900	3091400	4341900	4590200	3731500	2767400	3144600	3674500	3381300	3606500	4597050	3857750	1.19164	0.252949	0.074796	0.40683	3925750	3451725	1.13733	0.185651	0.176175	0.386663	3451725	3857750	0.894751	-0.160442	-0.123499	0.492642	3925750	4597050	0.853972	-0.22774	-0.0260288	0.454049	3925750	3857750	1.01763	0.0252086	-0.0531341	0.898348
P10404	MLV-related proviral Env polyprotein;Surface protein;Transmembrane protein	Env1	5	17316000	9933000	15132000	14299000	8755600	18901000	10396000	8581300	11618000	8860900	21099000	6775800	9158600	11180000	9597500	14678000	14170000	12088425	1.1722	0.229213	0.0397332	0.386373	11658475	11153525	1.04527	0.0638794	-0.00601819	0.977869	11153525	12088425	0.922662	-0.116127	-0.0787031	0.984265	11658475	14170000	0.822758	-0.281461	-0.0972778	0.301266	11658475	12088425	0.964433	-0.0522472	-0.167408	0.997845
Q02819	Nucleobindin-1	Nucb1	5	4412100	3412800	3885100	3170800	2869000	4915700	5083300	3703200	1883500	2709100	8251200	3667500	387778	324417	5176800	5236400	3720200	4127825	0.901249	-0.150002	-0.52046	0.881187	4142800	2.78135e+06	1.48949	0.574822	0.758449	0.147845	2.78135e+06	4127825	0.673805	-0.569597	-0.537092	0.23614	4142800	3720200	1.1136	0.155226	0.481894	0.590526	4142800	4127825	1.00363	0.00522436	-0.0826179	0.674587
Q9R1P3	Proteasome subunit beta type-2	Psmb2	5	27472000	18506000	21203000	18386000	21255000	37466000	20128000	14956000	12249000	11675000	21420000	15835000	19961000	16008000	13172000	20373000	21391750	15294750	1.39863	0.484018	0.416142	0.0728569	23451250	17378500	1.34944	0.432361	0.545301	0.24797	17378500	15294750	1.13624	0.184267	0.224949	0.432956	23451250	21391750	1.09628	0.13261	0.451899	0.822051	23451250	15294750	1.53329	0.616628	0.819416	0.114546
Q8R2Y2-2	Cell surface glycoprotein MUC18	Mcam	5	14089000	7716800	9214300	5119600	5863000	8919700	7054000	4582000	5789700	7680300	9322100	6061900	6047200	7108700	6379700	5923300	9034925	7213500	1.2525	0.324813	0.180957	0.451477	6604675	6364725	1.0377	0.0533894	-0.0217132	0.950151	6364725	7213500	0.882335	-0.180601	-0.143877	0.42991	6604675	9034925	0.731016	-0.452025	-0.323495	0.271377	6604675	7213500	0.915599	-0.127212	-0.278007	0.598198
O70435	Proteasome subunit alpha type-3	Psma3	5	12782000	9698500	7277900	5917000	8141800	14868000	8290700	6126000	7116300	5066900	7122500	6297200	7800900	6105400	4672500	7815600	8918850	6400725	1.39341	0.478622	0.408171	0.144184	9356625	6598600	1.41797	0.503828	0.65223	0.171496	6598600	6400725	1.03091	0.0439246	0.0830841	0.907571	9356625	8918850	1.04908	0.0691305	0.367707	0.883567	9356625	6400725	1.46181	0.547753	0.7178	0.131164
P26039	Talin-1	Tln1	5	1613000	2229200	4130800	3225500	1763700	2486800	4100000	4554700	1298700	1273100	3463200	1156400	1146300	2846200	1562100	2287000	2799625	1797850	1.55721	0.638961	0.645031	0.142835	3226300	1960400	1.64574	0.718733	0.973768	0.109841	1960400	1797850	1.09041	0.124875	0.164913	0.649568	3226300	2799625	1.1524	0.204647	0.547441	0.638919	3226300	1797850	1.79453	0.843608	1.15429	0.0767081
P11404	Fatty acid-binding protein, heart	Fabp3	5	22700000	5701400	15838000	6054900	8157700	14492000	3803300	4640200	11881000	501620	16173000	23125000	16373000	19053000	11885000	18648000	12573575	12920155	0.973175	-0.0392285	-0.356821	0.624629	7773300	16489750	0.471402	-1.08497	-1.72492	0.0158498	16489750	12920155	1.27628	0.351946	0.394447	0.308475	7773300	12573575	0.618225	-0.693796	-0.644153	0.30061	7773300	12920155	0.601641	-0.733024	-1.17179	0.984343
Q9R100	Cadherin-17	Cdh17	5	5877500	3749500	3602300	3133600	3423300	4811400	4164800	2864100	587669	3133500	4543100	3158000	3020300	2868900	2580000	4585700	4090725	2.85557e+06	1.43254	0.518579	0.467197	0.230429	3815900	3263725	1.16919	0.225504	0.235803	0.367013	3263725	2.85557e+06	1.14293	0.192742	0.233516	0.45017	3815900	4090725	0.932818	-0.100333	0.142949	0.748099	3815900	2.85557e+06	1.3363	0.418246	0.526733	0.267197
P17742	Peptidyl-prolyl cis-trans isomerase A;Peptidyl-prolyl cis-trans isomerase A, N-terminally processed	Ppia	5	12151000	8028400	11234000	6610500	6585200	10762000	11337000	3996900	2982200	3152900	15130000	16358000	7530800	8564300	4101900	9400900	9505975	9405775	1.01065	0.0152878	-0.276287	0.540987	8170275	7399475	1.10417	0.142962	0.112304	0.823785	7399475	9405775	0.786695	-0.346124	-0.311195	0.971758	8170275	9505975	0.859488	-0.21845	-0.0137075	0.454381	8170275	9405775	0.868645	-0.203162	-0.390061	0.868565
Q9R097	Kunitz-type protease inhibitor 1	Spint1	5	6209000	2836500	3168300	3323000	3120300	6653800	4181500	2715300	2998800	3040100	6621600	2317300	4390800	6764200	5145400	3373700	3884200	3744450	1.03732	0.0528637	-0.220779	0.798834	4167725	4918525	0.847353	-0.238966	-0.459132	0.416657	4918525	3744450	1.31355	0.393472	0.436423	0.230724	4167725	3884200	1.07299	0.101643	0.410827	0.812669	4167725	3744450	1.11304	0.154506	0.137625	0.650781
P14106	Complement C1q subcomponent subunit B	C1qb	5	54668000	20719000	44305000	41657000	50463000	34161000	31026000	30693000	38599000	34750000	45882000	3703100	52387000	73392000	44731000	35758000	40337250	30733525	1.31248	0.392299	0.280651	0.355318	36585750	51567000	0.70948	-0.495166	-0.842458	0.113563	51567000	30733525	1.67787	0.746635	0.793416	0.171151	36585750	40337250	0.906997	-0.140831	0.0892377	0.795731	36585750	30733525	1.19042	0.251469	0.280678	0.382865
Q02105	Complement C1q subcomponent subunit C	C1qc	5	48917000	17579000	38329000	39155000	41737000	28843000	26933000	27569000	33047000	30836000	38994000	3682000	42472000	69411000	39377000	31523000	35995000	26639750	1.35118	0.434216	0.342572	0.342769	31270500	45695750	0.68432	-0.547258	-0.920396	0.099611	45695750	26639750	1.71532	0.778479	0.825606	0.161392	31270500	35995000	0.868746	-0.202994	0.00679125	0.700215	31270500	26639750	1.17383	0.231222	0.250807	0.39414
P11438	Lysosome-associated membrane glycoprotein 1	Lamp1	5	8201400	617507	5047500	5468100	7588400	8742100	2287700	2981900	3244100	8312500	4295400	7355400	3554500	18845000	3527900	7013200	4.83363e+06	5801850	0.833118	-0.263407	-0.687988	0.44149	5400025	8235150	0.655729	-0.608829	-1.01252	0.493142	8235150	5801850	1.4194	0.505282	0.549446	0.694128	5400025	4.83363e+06	1.11718	0.15986	0.48804	0.626881	5400025	5801850	0.930742	-0.103547	-0.243093	0.672539
G5E8Q8	Adhesion G protein-coupled receptor F5	Adgrf5	5	9091400	8221500	10084000	9701000	7881100	6996400	11895000	5973000	7390300	6967900	8764900	8309500	8151700	9617900	6311900	9434200	9274475	7858150	1.18024	0.239076	0.0543024	0.140791	8186375	8378925	0.97702	-0.0335404	-0.151777	0.808751	8378925	7858150	1.06627	0.0925755	0.132263	0.675375	8186375	9274475	0.882678	-0.180041	0.037234	0.36021	8186375	7858150	1.04177	0.059035	-0.0032284	0.948576
P29621	Serine protease inhibitor A3C	Serpina3c	5	17504000	13161000	15981000	12209000	13708000	15094000	17287000	10914000	13087000	14112000	14226000	11506000	14168000	21002000	15021000	15503000	14713750	13232750	1.11192	0.153052	-0.0727758	0.426611	14250750	16423500	0.867705	-0.204724	-0.4079	0.344703	16423500	13232750	1.24113	0.311649	0.353712	0.121795	14250750	14713750	0.968533	-0.0461271	0.214842	0.811809	14250750	13232750	1.07693	0.106925	0.0674259	0.639455
Q3U9N4	Granulins;Acrogranin;Granulin-1;Granulin-2;Granulin-3;Granulin-4;Granulin-5;Granulin-6;Granulin-7	Grn	5	25971000	12958000	14498000	13651000	18205000	21060000	11034000	13145000	13972000	17014000	8968100	3543000	11692000	12513000	10944000	22819000	16769500	10874275	1.54213	0.62492	0.624289	0.1599	15861000	14492000	1.09447	0.130227	0.0932506	0.633527	14492000	10874275	1.33269	0.414337	0.457515	0.29517	15861000	16769500	0.945824	-0.0803559	0.169445	0.834465	15861000	10874275	1.45858	0.544565	0.713096	0.182831
Q9QXD6	Fructose-1,6-bisphosphatase 1	Fbp1	5	59932000	24935000	41246000	19735000	31380000	25539000	35951000	23413000	28920000	35645000	29939000	79126000	35902000	40673000	26508000	16118000	36462000	43407500	0.839993	-0.251551	-0.670473	0.595135	29070750	29800250	0.97552	-0.0357561	-0.155092	0.929681	29800250	43407500	0.686523	-0.54262	-0.509823	0.269915	29070750	36462000	0.797289	-0.326825	-0.157444	0.567275	29070750	43407500	0.669717	-0.578376	-0.943631	0.216888
F8WIP8	Osteopontin	Spp1	5	3006100	2929400	3350300	1801800	2646400	2288600	2430700	1492200	4202500	2613800	2193500	5362900	2566900	3305100	1640400	2468500	2771900	3593175	0.771435	-0.374384	-0.851928	0.372233	2214475	2495225	0.887485	-0.172205	-0.359246	0.567843	2495225	3593175	0.694435	-0.526089	-0.493113	0.199993	2214475	2771900	0.798901	-0.323911	-0.153578	0.267022	2214475	3593175	0.6163	-0.698294	-1.12055	0.0906729
Q9EQ08	Heparan N-sulfatase	Sgsh	5	9182100	5950700	325894	7805400	2047700	415732	1795300	576028	1694900	4617200	3129500	5755200	4449400	4928400	4527200	6375600	5.81602e+06	3799200	1.53085	0.614337	0.608656	0.996358	1.20869e+06	5070150	0.238393	-2.06858	-3.19659	0.00178906	5070150	3799200	1.33453	0.416333	0.459532	0.18738	NA	NA	NA	NA	NA	NA	1.20869e+06	3799200	0.318143	-1.65225	-2.52797	0.0183106
O89103	Complement component C1q receptor	Cd93	5	11281000	9254700	8064300	4411600	7688500	10755000	10399000	6775900	7322700	6226900	8386300	3795100	9546400	11244000	6428600	8341300	8252900	6432750	1.28295	0.359466	0.232147	0.374242	8904600	8890075	1.00163	0.00235522	-0.0980701	0.98579	8890075	6432750	1.382	0.46676	0.510506	0.126497	8904600	8252900	1.07897	0.10965	0.421447	0.620836	8904600	6432750	1.38426	0.469115	0.601782	0.123551
Q91XL1	Leucine-rich HEV glycoprotein	Lrg1	5	898310000	1614800000	1106800000	609730000	1324500000	1249400000	969860000	1026300000	693790000	824710000	1131300000	790770000	1254600000	1518100000	1057700000	729460000	1057410000	860142500	1.22934	0.297887	0.141181	0.47833	1142515000	1139965000	1.00224	0.00322358	-0.0967709	0.872886	1139965000	860142500	1.32532	0.406342	0.449432	0.189165	1142515000	1057410000	1.08048	0.111678	0.424137	0.547395	1142515000	860142500	1.32829	0.409566	0.513926	0.0771328
P47878	Insulin-like growth factor-binding protein 3	Igfbp3	5	8820500	6501800	5373300	6842600	10369000	7126700	6571900	6601800	6851500	7038100	6272300	5046600	6013800	7936500	6339600	8848700	6884550	6302125	1.09242	0.127524	-0.110487	0.576721	7667350	7284650	1.05254	0.0738684	0.00892731	0.772317	7284650	6302125	1.1559	0.209021	0.249972	0.31738	7667350	6884550	1.1137	0.155366	0.482079	0.524307	7667350	6302125	1.21663	0.28289	0.327035	0.241735
Q8BSB7	Tissue factor pathway inhibitor	Tfpi	5	25900000	24840000	21906000	18814000	20757000	18143000	13401000	14239000	19525000	24817000	18879000	20798000	22030000	20785000	22639000	22394000	22865000	21004750	1.08856	0.122425	-0.118019	0.497012	16635000	21962000	0.757445	-0.400788	-0.701249	0.0478357	21962000	21004750	1.04557	0.0642938	0.103674	0.624317	16635000	22865000	0.727531	-0.458919	-0.332639	0.0493966	16635000	21004750	0.791964	-0.336494	-0.586771	0.116382
A0A0J9YV87	Platelet-derived growth factor receptor alpha	Pdgfra	5	4851400	4874900	4278000	4080600	4246900	7491500	5113400	3774600	2414900	501620	5154200	3646000	4227100	5524900	3406700	4599700	4521225	2929180	1.54351	0.626217	0.626204	0.158261	5156600	4439600	1.1615	0.21599	0.221569	0.488162	4439600	2929180	1.51565	0.599933	0.645123	0.177806	5156600	4521225	1.14053	0.189706	0.527625	0.558495	5156600	2929180	1.76042	0.815923	1.11345	0.121036
P08228	Superoxide dismutase [Cu-Zn]	Sod1	5	7004700	5576200	6992100	7232100	6624100	9704800	9107200	4800800	4853700	3773500	11770000	25844000	7914200	6276000	3824600	11560000	6701275	11560300	0.57968	-0.786671	-1.46098	0.536002	7559225	7393700	1.02239	0.0319418	-0.0538029	0.816768	7393700	11560300	0.639577	-0.64481	-0.613122	0.615186	7559225	6701275	1.12803	0.173803	0.506532	0.626439	7559225	11560300	0.653895	-0.612869	-0.99452	0.692517
P23492	Purine nucleoside phosphorylase	Pnp	5	5107300	617507	4509900	4370700	2780800	6401200	16095000	3078400	2121200	501620	13718000	10522000	4743200	324417	343632	6132200	NA	NA	NA	NA	NA	NA	7088850	2.88586e+06	2.45641	1.29655	1.83829	0.108472	NA	NA	NA	NA	NA	NA	7088850	3.65135e+06	1.94143	0.957121	1.54544	0.271692	7088850	6715705	1.05556	0.0780127	0.0247703	0.581985
Q64374	Regucalcin	Rgn	5	641524	617507	325894	427232	299513	473800	513831	576028	587669	501620	578290	24340000	387778	324417	343632	997780	NA	NA	NA	NA	NA	NA	NA	NA	NA	NA	NA	NA	NA	NA	NA	NA	NA	NA	NA	NA	NA	NA	NA	NA	NA	NA	NA	NA	NA	NA
P21550	Beta-enolase;Enolase	Eno3	5	2261600	617507	325894	427232	299513	3185500	513831	576028	587669	501620	3557100	2513700	2010600	3219200	343632	2843500	NA	NA	NA	NA	NA	NA	NA	NA	NA	NA	NA	NA	NA	NA	NA	NA	NA	NA	NA	NA	NA	NA	NA	NA	NA	NA	NA	NA	NA	NA
B2RS76	Carboxypeptidase B1 (Tissue)	Cpb1	5	641524	617507	1737300	1535600	33820000	415732	1413800	1268500	1437400	501620	456769	530222	1883500	324417	1304000	1397000	NA	NA	NA	NA	NA	NA	NA	NA	NA	NA	NA	NA	NA	NA	NA	NA	NA	NA	NA	NA	NA	NA	NA	NA	NA	NA	NA	NA	NA	NA
P32848	Parvalbumin alpha	Pvalb	4	10364000	3944700	2629500	11132000	2525400	415732	513831	576028	587669	501620	21442000	11038000	387778	324417	343632	397664	7017550	8.39232e+06	0.836187	-0.258103	-0.680152	0.463928	NA	NA	NA	NA	NA	NA	NA	NA	NA	NA	NA	NA	1.00775e+06	7017550	0.143604	-2.79983	-3.43736	0.00234627	NA	NA	NA	NA	NA	NA
P01654	Immunoglobulinkappa chain V-III region PC 2880/PC 1229;Immunoglobulinkappa chain V-III region MOPC 70;Immunoglobulinkappa chain V-III region PC 7132;Immunoglobulinkappa chain V-III region 50S10.1	Igkv3-2	4	150190000	17098000	105980000	42142000	299513	11749000	513831	576028	587669	20492000	47938000	11263000	387778	324417	343632	10886000	78852500	2.00702e+07	3.92884	1.9741	2.61736	0.086923	NA	NA	NA	NA	NA	NA	NA	NA	NA	NA	NA	NA	3.28459e+06	78852500	0.0416549	-4.58537	-5.8055	0.00113002	NA	NA	NA	NA	NA	NA
P01592	Immunoglobulin J chain	Igj	4	91959000	16765000	29809000	29706000	22278000	29769000	17091000	3884300	14070000	13355000	14904000	6245100	4683200	7327700	5998600	11342000	42059750	12143525	3.46355	1.79225	2.34873	0.0200122	18255575	7337875	2.48786	1.3149	1.86575	0.124941	7337875	12143525	0.604262	-0.726753	-0.695953	0.0870653	18255575	42059750	0.434039	-1.2041	-1.32097	0.124625	18255575	12143525	1.50332	0.58815	0.7774	0.615577
Q99JC1	Immunoglobulinlambda-2 chain C region	Iglc2	4	9950900	4662200	8174600	3685900	2404500	7720300	1777000	739170	2339000	4129100	2956500	1606400	1230300	1359200	1030400	4876200	6618400	2757750	2.39993	1.26299	1.56688	0.0172913	3.16024e+06	2124025	1.48786	0.573235	0.756075	0.623839	2124025	2757750	0.770202	-0.376691	-0.342094	0.282533	3.16024e+06	6618400	0.477493	-1.06645	-1.1384	0.0622932	3.16024e+06	2757750	1.14595	0.196544	0.199645	0.742512
Q91Y47	Coagulation factor XI;Coagulation factor XIa heavy chain;Coagulation factor XIa light chain	F11	4	2235100	617507	325894	1818600	2881700	5211800	2574300	4153700	2494800	1999800	4062500	2567600	2480600	4735800	3565600	10158000	1.24928e+06	2781175	0.44919	-1.1546	-2.0045	0.0437746	3705375	5235000	0.707808	-0.49857	-0.84755	0.447391	5235000	2781175	1.8823	0.912495	0.961076	0.12454	3705375	1.24928e+06	2.96602	1.56853	2.35634	0.0139113	3705375	2781175	1.33231	0.413925	0.520358	0.221652
P47877	Insulin-like growth factor-binding protein 2	Igfbp2	4	8787200	7396100	9084800	11294000	17181000	15130000	12127000	8530200	8080100	8235200	13417000	13771000	17787000	19293000	12171000	11728000	9140525	10875825	0.840444	-0.250776	-0.669329	0.400462	13242050	15244750	0.86863	-0.203186	-0.405599	0.458748	15244750	10875825	1.40171	0.487188	0.531155	0.107089	13242050	9140525	1.44872	0.534778	0.985288	0.0834944	13242050	10875825	1.21757	0.284002	0.328676	0.370783
P12246	Serum amyloid P-component	Apcs	4	111160000	98203000	120920000	80229000	154610000	153060000	109170000	117600000	97679000	83224000	73359000	108320000	117110000	117630000	154840000	180760000	102628000	90645500	1.13219	0.179117	-0.0342714	0.392481	133610000	142585000	0.937055	-0.0937942	-0.241928	0.699542	142585000	90645500	1.573	0.653515	0.699286	0.0157103	133610000	102628000	1.30189	0.380604	0.78081	0.10041	133610000	90645500	1.47398	0.559721	0.735457	0.0256994
Q9CR35	Chymotrypsinogen B;Chymotrypsin B chain A;Chymotrypsin B chain B;Chymotrypsin B chain C	Ctrb1	4	2570200	617507	2021900	427232	67571000	2672900	2045800	576028	1912400	501620	2387400	1730200	2174100	5131400	2010000	2469300	NA	NA	NA	NA	NA	NA	18216432	2946200	6.18303	2.62831	3.83087	0.71589	2946200	1632905	1.80427	0.851415	0.899333	0.115018	NA	NA	NA	NA	NA	NA	NA	NA	NA	NA	NA	NA
O35664-3	Interferon alpha/beta receptor 2	Ifnar2	4	143030000	131770000	112150000	103710000	108960000	101310000	97044000	66267000	107640000	80577000	93810000	59079000	126510000	56136000	74064000	93642000	122665000	85276500	1.43844	0.524504	0.475949	0.0405243	93395250	87588000	1.0663	0.092616	0.0369773	0.6551	87588000	85276500	1.02711	0.038585	0.0776865	0.977147	93395250	122665000	0.761385	-0.393303	-0.245612	0.0903155	93395250	85276500	1.09521	0.131201	0.103241	0.590316
B7ZCG3	BPI fold-containing family A member 2	Bpifa2	4	1997000	12955000	5964200	3063200	17596000	4326700	9218700	4181400	1851500	5657000	8538100	8163300	15807000	33859000	7079100	6550800	5994850	6052475	0.990479	-0.0138016	-0.31926	0.828825	8830700	15823975	0.558058	-0.841512	-1.36066	0.270406	15823975	6052475	2.61446	1.38651	1.44024	0.0985526	8830700	5994850	1.47305	0.558804	1.01715	0.35488	8830700	6052475	1.45902	0.545003	0.713743	0.451641
Q63880-2	Carboxylesterase 3A;Carboxylesterase 3B	Ces3a	4	2346300	3569600	3290400	427232	7987300	4066400	3591100	3555100	3322300	6176200	3554900	4044500	4521000	3551800	5939300	3878100	2.40838e+06	4274475	0.563434	-0.827682	-1.52156	0.122209	4799975	4472550	1.07321	0.101929	0.0509118	0.895518	4472550	4274475	1.04634	0.0653504	0.104742	0.757564	4799975	2.40838e+06	1.99303	0.994962	1.59563	0.0913465	4799975	4274475	1.12294	0.16728	0.15647	0.716201
A0A0R4IZW5	Cadherin-1;E-Cad/CTF1;E-Cad/CTF2;E-Cad/CTF3	Cdh1	4	24728000	15300000	21144000	14513000	17212000	17542000	14936000	9465000	13905000	10026000	20245000	9089200	14042000	17283000	13084000	13350000	18921250	13316300	1.42091	0.506814	0.449817	0.114837	14788750	14439750	1.02417	0.0344544	-0.0500436	0.991734	14439750	13316300	1.08437	0.116852	0.156803	0.521357	14788750	18921250	0.781595	-0.355507	-0.195485	0.221407	14788750	13316300	1.11058	0.151307	0.132905	0.580112
A0A1B0GR11	Transaldolase	Taldo1	4	2102600	2126100	2090600	1540500	1915700	2834200	1563400	1247600	924580	501620	1383500	1850000	1654500	1558600	343632	1804300	1964950	1164925	1.68676	0.754256	0.815349	0.052088	1890225	1.34026e+06	1.41034	0.496047	0.640588	0.249808	NA	NA	NA	NA	NA	NA	1890225	1964950	0.961971	-0.0559346	0.201835	0.69317	1890225	1164925	1.62262	0.698321	0.939941	0.108547
Q91WG0	Acylcarnitine hydrolase;Carboxylic ester hydrolase	Ces2c	4	641524	617507	3790700	3832500	3365700	5127000	3191700	3482000	4548800	6858400	4119600	2443600	1789000	3517800	3442800	5136700	2.22056e+06	4492600	0.49427	-1.01663	-1.80068	0.0835789	3791600	3471575	1.09218	0.127216	0.0887462	0.565992	3471575	4492600	0.772732	-0.37196	-0.337312	0.382671	3791600	2.22056e+06	1.7075	0.771885	1.29976	0.0945293	3791600	4492600	0.843966	-0.244744	-0.451408	0.600797
B1AXW5	Peroxiredoxin-1	Prdx1	4	641524	7833500	7053500	7106700	6849400	9075300	513831	6555100	6298300	7604600	8861800	15910000	7181600	9037200	8920600	9182600	5658806	9668675	0.585272	-0.772821	-1.44052	0.190501	5.74841e+06	8580500	0.669939	-0.577899	-0.966242	0.202966	8580500	9668675	0.887454	-0.172256	-0.135442	0.772913	NA	NA	NA	NA	NA	NA	5.74841e+06	9668675	0.594539	-0.750156	-1.19707	0.196255
P28063	Proteasome subunit beta type-8;Proteasome subunit beta type	Psmb8	4	12098000	7821300	6609300	5157400	7066300	11508000	5990700	5025600	4631000	5390900	6387200	5267200	5246800	5795500	4177700	8361100	7921500	5419075	1.46178	0.547727	0.510256	0.112265	7397650	5895275	1.25484	0.327508	0.388421	0.360996	5895275	5419075	1.08787	0.121512	0.161514	0.725294	7397650	7921500	0.93387	-0.0987066	0.145107	0.776948	7397650	5419075	1.36511	0.44902	0.572136	0.194444
Q9DBJ1	Phosphoglycerate mutase 1;Phosphoglycerate mutase 2	Pgam1	4	11022000	8370900	8932400	6831000	7752200	13712000	6177700	4340800	4999300	4391700	8024900	10878000	7541400	7734800	6609100	8337000	8789075	7073475	1.24254	0.313292	0.163938	0.258707	7995675	7555575	1.05825	0.0816783	0.0206124	0.89887	7555575	7073475	1.06816	0.0951224	0.134837	0.54878	7995675	8789075	0.909729	-0.136492	0.094993	0.500649	7995675	7073475	1.13037	0.176801	0.170517	0.7435
O55111	Desmoglein-2	Dsg2	4	7589300	4981300	6709100	4306400	3446500	9256300	5858300	3804500	3589500	3977600	5471800	3341900	8168900	7144900	5361800	6823400	5896525	4095200	1.43986	0.525931	0.478058	0.0711142	5591400	6874750	0.813324	-0.298098	-0.547605	0.257874	6874750	4095200	1.67873	0.747373	0.794163	0.00759824	5591400	5896525	0.948253	-0.0766554	0.174353	0.668695	5591400	4095200	1.36535	0.449276	0.572512	0.320531
A0A0R4IZZ5	C-type lectin domain family 4 member F	Clec4f	4	641524	4608700	7046800	4096300	5699600	2958500	3758200	3584400	3296100	4390200	5555000	3089000	7460900	7996100	4067500	2951300	4098331	4082575	1.00386	0.00555712	-0.290662	0.602452	4000175	5618950	0.711908	-0.490237	-0.835083	0.290509	5618950	4082575	1.37632	0.460821	0.504503	0.332609	4000175	4098331	0.97605	-0.0349734	0.229635	0.622759	4000175	4082575	0.979817	-0.0294163	-0.133725	0.910257
A0A1W2P6Q2	ICOS ligand	Icoslg	4	15565000	7567700	7981700	7276200	8007800	9354800	10742000	7042200	6305700	6897100	9593500	9360800	8012500	6596300	6149400	9407200	9597650	8039275	1.19385	0.255616	0.0787359	0.508302	8786700	7541350	1.16514	0.220499	0.228314	0.316389	7541350	8039275	0.938063	-0.0922426	-0.0545601	0.693219	8786700	9597650	0.915505	-0.12736	0.107104	0.816287	8786700	8039275	1.09297	0.128256	0.0988966	0.558688
Q07079	Insulin-like growth factor-binding protein 5	Igfbp5	4	641524	7241700	4685000	8245600	11381000	2654400	3958000	3984500	11742000	7452200	6429000	2315500	7075900	5436400	6491100	5535500	5203456	6984675	0.744982	-0.424723	-0.926291	0.441609	5494475	6134725	0.895635	-0.159017	-0.339514	0.379618	6134725	6984675	0.878312	-0.187194	-0.150542	0.963906	5494475	5203456	1.05593	0.0785115	0.380149	0.68496	5494475	6984675	0.786647	-0.346211	-0.601108	0.559441
Q8CFZ6	Tetranectin	Clec3b	4	124280000	68388000	93705000	67748000	66442000	129010000	90146000	65828000	80402000	68171000	94755000	79507000	96012000	100410000	83361000	122940000	88530250	80708750	1.09691	0.133445	-0.10174	0.692872	87856500	100680750	0.872625	-0.196567	-0.395696	0.374277	100680750	80708750	1.24746	0.318991	0.361134	0.112804	87856500	88530250	0.99239	-0.0110215	0.261402	0.944668	87856500	80708750	1.08856	0.122424	0.0902923	0.774231
Q9R1P1	Proteasome subunit beta type-3	Psmb3	4	41009000	26778000	24666000	18672000	23347000	44727000	23581000	20453000	17959000	18592000	22095000	16793000	24440000	24986000	15054000	27171000	27781250	18859750	1.47304	0.558801	0.526615	0.0783423	28027000	22912750	1.22321	0.290667	0.333299	0.425593	22912750	18859750	1.2149	0.28084	0.322569	0.281163	28027000	27781250	1.00885	0.0127058	0.292871	0.996382	28027000	18859750	1.48607	0.571507	0.752846	0.0949875
G5E843	Roundabout homolog 1	Robo1	4	171370000	117400000	118780000	234800000	13916000	11000000	128460000	131270000	128070000	113380000	279800000	290240000	134410000	25390000	155510000	233700000	160587500	202872500	0.791569	-0.337214	-0.797018	0.522745	71161500	137252500	0.518471	-0.947664	-1.51948	0.217047	137252500	202872500	0.676546	-0.563741	-0.531173	0.285105	71161500	160587500	0.443132	-1.17419	-1.28129	0.0564808	71161500	202872500	0.35077	-1.5114	-2.32017	0.0430414
S4R257	Glyceraldehyde-3-phosphate dehydrogenase	Gapdh	4	7975200	617507	4172300	3270700	4936400	7890200	5183300	4146000	587669	501620	3810300	9257200	8053300	3125600	1823300	10183000	NA	NA	NA	NA	NA	NA	5538975	5796300	0.955605	-0.0655132	-0.199614	0.707892	5796300	3.5392e+06	1.63774	0.71171	0.758113	0.228322	5538975	4.00893e+06	1.38166	0.466403	0.894604	0.23277	5538975	3.5392e+06	1.56504	0.646197	0.863039	0.124605
O88200	C-type lectin domain family 11 member A	Clec11a	4	7710800	3273100	2873600	2193600	6309200	10454000	4905400	5813600	587669	3696400	4577400	2804400	2805300	3260100	5291700	7098100	4012775	2.91647e+06	1.3759	0.460378	0.38122	0.395012	6870550	4613800	1.48913	0.57447	0.757923	0.12331	4613800	2.91647e+06	1.58198	0.661734	0.707594	0.209394	6870550	4012775	1.71217	0.775825	1.30499	0.0622231	6870550	2.91647e+06	2.35578	1.2362	1.7335	0.0432087
E9QPK1	Cell growth regulator with EF hand domain protein 1	Cgref1	4	20916000	41351000	40135000	27587000	61676000	29981000	31342000	30813000	42226000	30586000	30433000	28806000	26579000	51426000	30780000	36399000	32497250	33012750	0.984385	-0.0227057	-0.332413	0.824341	38453000	36296000	1.05943	0.0832856	0.0230173	0.860802	36296000	33012750	1.09945	0.136787	0.176954	0.663552	38453000	32497250	1.18327	0.242779	0.598014	0.506376	38453000	33012750	1.16479	0.220073	0.234358	0.570602
A0A1B0GR60	Ferritin;Ferritin light chain 1	Ftl1	4	14701000	11191000	14193000	8570400	6166200	10389000	8865500	5205300	2541000	10864000	7255100	15973000	14230000	13438000	5630000	11225000	12163850	9158275	1.32818	0.409452	0.30599	0.258835	7656500	11130750	0.687869	-0.539794	-0.909229	0.187795	11130750	9158275	1.21538	0.281403	0.323138	0.435586	7656500	12163850	0.629447	-0.667843	-0.609732	0.0402413	7656500	9158275	0.83602	-0.258391	-0.471542	0.960077
Q9CPN9	RIKEN cDNA 2210010C04 gene	2210010C04Rik	4	24464000	28321000	22805000	15830000	64514000	29401000	21849000	19974000	24109000	22036000	22931000	14739000	20476000	25621000	22873000	14821000	22855000	20953750	1.09074	0.125301	-0.11377	0.637393	33934500	20947750	1.61996	0.695957	0.939692	0.184324	20947750	20953750	0.999714	-0.000413168	0.0382654	0.988745	33934500	22855000	1.48477	0.570243	1.03233	0.295747	33934500	20953750	1.6195	0.695544	0.935844	0.191515
P21460	Cystatin-C	Cst3	4	16038000	14748000	10851000	8812000	13749000	10314000	11035000	6372900	15196000	5978500	10094000	5673500	15986000	12749000	7653900	10638000	12612250	9235500	1.36563	0.449564	0.365244	0.1867	10367725	11756725	0.881855	-0.181387	-0.372983	0.564415	11756725	9235500	1.27299	0.348224	0.390684	0.297635	10367725	12612250	0.822036	-0.282726	-0.0989564	0.345498	10367725	9235500	1.12259	0.166837	0.155818	0.554079
Q05909	Receptor-type tyrosine-protein phosphatase gamma;Protein-tyrosine-phosphatase	Ptprg	4	15299000	10835000	11804000	12547000	9616700	15577000	12947000	7625600	9370900	10485000	12285000	11016000	14222000	12724000	10233000	11059000	12621250	10789225	1.1698	0.226264	0.0353755	0.221618	11441575	12059500	0.94876	-0.0758844	-0.215132	0.651726	12059500	10789225	1.11774	0.160579	0.201004	0.371684	11441575	12621250	0.906533	-0.141569	0.0882586	0.490392	11441575	10789225	1.06046	0.0846944	0.0346281	0.880972
P98064	Mannan-binding lectin serine protease 1;Mannan-binding lectin serine protease 1 heavy chain;Mannan-binding lectin serine protease 1 light chain	Masp1	4	16382000	30660000	33610000	26171000	24581000	23765000	32478000	34061000	24310000	22646000	23572000	17854000	24870000	26467000	25977000	20521000	26705750	22095500	1.20865	0.273398	0.105004	0.382895	28721250	24458750	1.17427	0.231768	0.245175	0.271015	24458750	22095500	1.10696	0.146598	0.186871	0.387151	28721250	26705750	1.07547	0.104968	0.415238	0.617555	28721250	22095500	1.29987	0.378366	0.467896	0.0969153
P97797-2	Tyrosine-protein phosphatase non-receptor type substrate 1	Sirpa	4	8782600	6213600	5824400	5877000	5371200	9644600	5055000	4019700	3620900	5261700	5642400	4612500	7257100	8232800	4837000	5374400	6674400	4784375	1.39504	0.480308	0.410661	0.0549848	6022625	6425325	0.937326	-0.093377	-0.241304	0.657891	6425325	4784375	1.34298	0.425439	0.468737	0.114892	6022625	6674400	0.902347	-0.148246	0.0794035	0.498225	6022625	4784375	1.25881	0.332062	0.399581	0.384174
Q8C7E4	Ribonuclease 4	Rnase4	4	18827000	16041000	15901000	8860200	11929000	13709000	12506000	10874000	14975000	14597000	16973000	5925300	14910000	17262000	13542000	9775500	14907300	13117575	1.13644	0.184518	-0.026293	0.561287	12254500	13872375	0.883374	-0.178903	-0.369267	0.474749	13872375	13117575	1.05754	0.0807138	0.120272	0.674938	12254500	14907300	0.822047	-0.282707	-0.0989312	0.378482	12254500	13117575	0.934205	-0.0981894	-0.235189	0.990428
V9GXT4	Interleukin-6 receptor subunit beta	Il6st	4	6567900	4422100	4685800	4719400	4699400	7066800	5738500	4076300	4020400	4448500	6065400	4524700	3858500	6596900	3569900	6060600	5098800	4764750	1.07011	0.0977572	-0.15446	0.639634	5395250	5021475	1.07444	0.103579	0.0533795	0.663099	5021475	4764750	1.05388	0.0757107	0.115215	0.874763	5395250	5098800	1.05814	0.0815321	0.384155	0.771076	5395250	4764750	1.13233	0.179289	0.174188	0.489459
P08121	Collagen alpha-1(III) chain	Col3a1	4	2802500	1030300	1661100	1263500	2995200	4202200	1291600	848780	1087000	906830	2094300	968490	981940	962520	2087500	2423300	1689350	1264155	1.33635	0.418295	0.319053	0.333648	2334445	1613815	1.44654	0.532604	0.695284	0.51516	1613815	1264155	1.2766	0.352302	0.394806	0.467257	2334445	1689350	1.38186	0.466611	0.89488	0.600522	2334445	1264155	1.84664	0.884906	1.21522	0.231885
Q91XA2	Golgi membrane protein 1	Golm1	4	3294600	617507	325894	1916700	299513	5081700	2025100	2770500	3002500	2266800	2401400	2374700	387778	1772000	2543700	4819500	1.53868e+06	2511350	0.612689	-0.706774	-1.34295	0.111359	NA	NA	NA	NA	NA	NA	2.38074e+06	2511350	0.947994	-0.0770504	-0.0392031	0.450979	NA	NA	NA	NA	NA	NA	2.5442e+06	2511350	1.01308	0.0187508	-0.0626617	0.504711
Q8VC30	Bifunctional ATP-dependent dihydroxyacetone kinase/FAD-AMP lyase (cyclizing);ATP-dependent dihydroxyacetone kinase;FAD-AMP lyase (cyclizing)	Dak	4	641524	617507	325894	427232	299513	415732	513831	576028	587669	501620	456769	530222	387778	324417	343632	397664	NA	NA	NA	NA	NA	NA	NA	NA	NA	NA	NA	NA	NA	NA	NA	NA	NA	NA	NA	NA	NA	NA	NA	NA	NA	NA	NA	NA	NA	NA
O35215	D-dopachrome decarboxylase	Ddt	4	1029700	617507	325894	427232	299513	415732	513831	576028	587669	501620	456769	8918100	387778	324417	343632	397664	NA	NA	NA	NA	NA	NA	NA	NA	NA	NA	NA	NA	NA	NA	NA	NA	NA	NA	NA	NA	NA	NA	NA	NA	NA	NA	NA	NA	NA	NA
O88325	Alpha-N-acetylglucosaminidase	Naglu	4	641524	1892400	4231600	427232	299513	415732	513831	576028	587669	501620	2192200	530222	387778	324417	343632	397664	NA	NA	NA	NA	NA	NA	NA	NA	NA	NA	NA	NA	NA	NA	NA	NA	NA	NA	NA	NA	NA	NA	NA	NA	NA	NA	NA	NA	NA	NA
P49429	4-hydroxyphenylpyruvate dioxygenase	Hpd	4	1839700	1240500	708560	427232	392340	415732	513831	576028	587669	581430	456769	16347000	387778	324417	343632	576120	NA	NA	NA	NA	NA	NA	NA	NA	NA	NA	NA	NA	NA	NA	NA	NA	NA	NA	NA	NA	NA	NA	NA	NA	NA	NA	NA	NA	NA	NA
Q7TQG5	Neogenin	Neo1	4	2272900	617507	325894	427232	299513	3457500	513831	576028	587669	501620	456769	530222	387778	324417	343632	2746700	NA	NA	NA	NA	NA	NA	NA	NA	NA	NA	NA	NA	NA	NA	NA	NA	NA	NA	NA	NA	NA	NA	NA	NA	NA	NA	NA	NA	NA	NA
P70296	Phosphatidylethanolamine-binding protein 1;Hippocampal cholinergic neurostimulating peptide	Pebp1	4	5660200	617507	5281200	4190700	4379100	4767400	513831	576028	587669	501620	7294600	9304100	4042100	4353800	343632	4509600	NA	NA	NA	NA	NA	NA	NA	NA	NA	NA	NA	NA	NA	NA	NA	NA	NA	NA	NA	NA	NA	NA	NA	NA	NA	NA	NA	NA	NA	NA
A0A0J9YKD4	Creatine kinase M-type	Ckm	4	6836800	617507	325894	1635900	299513	4810400	513831	576028	1799300	501620	12501000	8713800	387778	5384100	5555700	3220300	NA	NA	NA	NA	NA	NA	NA	NA	NA	NA	NA	NA	NA	NA	NA	NA	NA	NA	NA	NA	NA	NA	NA	NA	NA	NA	NA	NA	NA	NA
O88844	Isocitrate dehydrogenase [NADP] cytoplasmic	Idh1	3	3557600	2664400	3808000	2584100	2318400	3225200	513831	576028	587669	501620	2779900	8064500	387778	324417	343632	397664	3153525	2.98342e+06	1.05702	0.0799972	-0.180696	0.301764	NA	NA	NA	NA	NA	NA	NA	NA	NA	NA	NA	NA	1.65836e+06	3153525	0.525877	-0.927204	-0.953719	0.0569523	NA	NA	NA	NA	NA	NA
A0A075B5K0	Immunoglobulin kappa variable 14-126 (Fragment)	Igkv14-126	3	17603000	3290800	4202800	4144100	299513	415732	513831	576028	1574500	3276700	6962800	530222	387778	324417	343632	397664	7310175	3.08606e+06	2.36878	1.24414	1.53903	0.13681	NA	NA	NA	NA	NA	NA	NA	NA	NA	NA	NA	NA	451276	7310175	0.0617326	-4.01782	-5.05277	9.57487e-05	NA	NA	NA	NA	NA	NA
A0A075B5M7	Immunoglobulin kappa variable 5-39	Igkv5-39	3	41739000	3573700	9512300	84578000	18715000	2972800	6063500	1028200	21743000	17123000	12089000	530222	387778	324417	343632	2934400	34850750	1.28713e+07	2.70763	1.43703	1.82398	0.355771	7194875	997557	7.2125	2.8505	4.1633	0.0217503	NA	NA	NA	NA	NA	NA	7194875	34850750	0.206448	-2.27615	-2.74281	0.107461	7194875	1.28713e+07	0.558986	-0.839117	-1.32831	0.617019
Q8CF98	Collectin-10	Colec10	3	9674800	12854000	10146000	7722100	8081300	7819300	7277700	7445600	8561100	6219100	6755300	5000000	7049300	6378400	4809500	5075100	10099225	6633875	1.52237	0.606321	0.596813	0.0288327	7655975	5828075	1.31364	0.393567	0.487257	0.0445748	5828075	6633875	0.878533	-0.186832	-0.150176	0.433972	7655975	10099225	0.758075	-0.399587	-0.253947	0.0787974	7655975	6633875	1.15407	0.206734	0.214679	0.265587
A0A0A6YXN4	Immunoglobulin heavy variable V1-18 (Fragment)	Ighv1-18	3	35180000	1570000	1690400	2197700	1191000	1615400	513831	576028	587669	1423400	456769	530222	387778	324417	343632	397664	10159525	749515	13.5548	3.76073	5.25665	0.0403379	NA	NA	NA	NA	NA	NA	NA	NA	NA	NA	NA	NA	974065	10159525	0.095877	-3.38267	-4.21037	0.0640462	NA	NA	NA	NA	NA	NA
G3XA25	Acetyl-CoA acetyltransferase, cytosolic	Acat2	3	3057400	1182100	1045900	322880	294250	826200	285280	207040	238360	433840	603580	2058500	310960	183320	211000	336660	1402070	833570	1.68201	0.750183	0.809333	0.359646	403192	260485	1.54785	0.630269	0.841409	0.322355	260485	833570	0.312493	-1.6781	-1.65762	0.0794954	403192	1402070	0.287569	-1.79802	-2.10867	0.0485332	403192	833570	0.483694	-1.04783	-1.63625	0.289066
Q07235	Glia-derived nexin	Serpine2	3	641524	617507	1333100	427232	299513	415732	513831	576028	587669	501620	5291800	3248600	1517900	2713600	1251600	1393800	NA	NA	NA	NA	NA	NA	451276	1719225	0.262488	-1.92968	-2.98876	0.000235026	1719225	2.40742e+06	0.714135	-0.485731	-0.452316	0.878514	NA	NA	NA	NA	NA	NA	NA	NA	NA	NA	NA	NA
Q62087	Serum paraoxonase/lactonase 3	Pon3	3	4606800	7218600	5402800	5414500	3434200	415732	513831	576028	3912300	6712500	5071200	3562000	4872400	5492500	343632	397664	5660675	4814500	1.17576	0.233588	0.0461956	0.325929	NA	NA	NA	NA	NA	NA	2.77655e+06	4814500	0.576706	-0.794093	-0.764023	0.116367	1.23495e+06	5660675	0.218163	-2.19652	-2.6372	0.00201385	1.23495e+06	4814500	0.256506	-1.96294	-2.98634	0.00465084
P17047-3	Lysosome-associated membrane glycoprotein 2	Lamp2	3	25865000	23503000	28617000	21520000	23256000	20184000	23983000	15438000	18476000	19620000	22111000	17190000	22671000	21621000	14278000	19669000	24876250	19349250	1.28564	0.362491	0.236617	0.0515713	20715250	19559750	1.05908	0.0828053	0.0222987	0.712076	19559750	19349250	1.01088	0.0156103	0.0544626	0.998651	20715250	24876250	0.832732	-0.264076	-0.0742204	0.197576	20715250	19349250	1.0706	0.0984156	0.0548716	0.677531
P70195	Proteasome subunit beta type-7	Psmb7	3	6274900	3691800	4980500	3436300	4315500	5242900	3805800	2753100	3038900	2025600	2885200	1928200	3341700	324417	1544200	5025900	4595875	2469475	1.86107	0.896135	1.02494	0.0100511	4029325	2.55905e+06	1.57454	0.654927	0.878303	0.158842	2.55905e+06	2469475	1.03627	0.0514064	0.090647	0.540629	4029325	4595875	0.876726	-0.189801	0.0242888	0.517501	4029325	2469475	1.63165	0.706334	0.951762	0.0281484
A0A494B952	Isochorismatase domain-containing protein 1	Isoc1	3	10725000	6762600	6472300	3806000	5715800	17480000	6473000	4002400	3872500	501620	1962100	5463200	4914800	324417	2720400	5927900	6941475	2949855	2.35316	1.2346	1.52493	0.0617205	8417800	3.47188e+06	2.42457	1.27773	1.81013	0.107852	NA	NA	NA	NA	NA	NA	8417800	6941475	1.21268	0.278201	0.644994	0.790833	8417800	2949855	2.85363	1.5128	2.14158	0.0571067
P97821	Dipeptidyl peptidase 1;Dipeptidyl peptidase 1 exclusion domain chain;Dipeptidyl peptidase 1 heavy chain;Dipeptidyl peptidase 1 light chain	Ctsc	3	3426700	2490400	3214700	2410700	2695300	2956200	2711200	2015000	2410900	4293400	2273500	2011700	787650	1749300	2762700	2788200	2885625	2747375	1.05032	0.07083	-0.194238	0.667243	2594425	2.02196e+06	1.28312	0.359659	0.436524	0.240911	2.02196e+06	2747375	0.735962	-0.442298	-0.408412	0.265197	2594425	2885625	0.899086	-0.153469	0.0724759	0.4745	2594425	2747375	0.944329	-0.082639	-0.212247	0.913531
Q8K1I3	Secreted phosphoprotein 24	Spp2	3	107350000	130440000	103400000	99708000	107050000	79865000	72129000	65691000	89739000	105320000	72274000	70324000	113950000	100590000	71837000	70363000	110224500	84414250	1.30576	0.384886	0.2697	0.0663012	81183750	89185000	0.910285	-0.13561	-0.304493	0.599726	89185000	84414250	1.05652	0.0793145	0.118858	0.773851	81183750	110224500	0.736531	-0.441182	-0.309114	0.051202	81183750	84414250	0.96173	-0.0562956	-0.173381	0.788891
P26339	Chromogranin-A;Pancreastatin;Beta-granin;WE-14;Catestatin;GE-25;Serpinin-RRG;Serpinin;p-Glu serpinin precursor	Chga	3	3228200	2573100	2531700	2295800	2230100	4509700	513831	1061700	2553800	1870300	2416800	3156400	1944300	1710300	2212500	2763400	2657200	2499325	1.06317	0.0883683	-0.16833	0.630398	2.07883e+06	2157625	0.963482	-0.0536705	-0.181895	0.45814	2157625	2499325	0.863283	-0.212094	-0.175712	0.36985	2.07883e+06	2657200	0.78234	-0.354133	-0.193662	0.226748	2.07883e+06	2499325	0.831758	-0.265765	-0.482421	0.300841
Q99LJ1	Tissue alpha-L-fucosidase	Fuca1	3	4914000	3629300	5001400	3294400	3188300	3845600	2837700	1751100	3652200	5248500	4364900	3909800	3986800	4005400	2785800	2679300	4209775	4293850	0.98042	-0.0285287	-0.341015	0.855477	2905675	3364325	0.863673	-0.211444	-0.417954	0.410866	3364325	4293850	0.783522	-0.351955	-0.317089	0.118124	2905675	4209775	0.690221	-0.53487	-0.433371	0.0755455	2905675	4293850	0.676706	-0.563398	-0.921534	0.0533322
A0A0R4J0M4	Apolipoprotein F	Apof	3	6603800	15354000	6977000	6365900	8773900	3511600	6404900	6428300	6311700	501620	5929900	530222	7856200	8063800	343632	4194900	8825175	3.31836e+06	2.6595	1.41115	1.78575	0.0513734	6279675	5.11463e+06	1.22779	0.296059	0.341367	0.352658	NA	NA	NA	NA	NA	NA	6279675	8825175	0.711564	-0.490935	-0.375101	0.257644	6279675	3.31836e+06	1.8924	0.920219	1.26732	0.0991546
Q3TSR0	Exostosin-like 2	Extl2	3	8851300	7405700	10122000	5322100	299513	415732	10190000	5169600	8774200	4151300	456769	2425000	11016000	2431600	4550500	5088600	7925275	3.95182e+06	2.00548	1.00394	1.1842	0.0887516	4.01871e+06	5771675	0.696282	-0.522257	-0.882991	0.197003	5771675	3.95182e+06	1.46051	0.546474	0.591084	0.304752	4.01871e+06	7925275	0.507075	-0.979728	-1.02338	0.075615	NA	NA	NA	NA	NA	NA
D3Z7M4	Insulin-like growth factor I	Igf1	3	30041000	31170000	24205000	30834000	26807000	22985000	24909000	20153000	26299000	30168000	21506000	15812000	22827000	28203000	25364000	24882000	29062500	23446250	1.23954	0.309802	0.158782	0.170651	23713500	25319000	0.936589	-0.0945118	-0.243002	0.550699	25319000	23446250	1.07987	0.110863	0.150749	0.520181	23713500	29062500	0.815948	-0.29345	-0.113179	0.121431	23713500	23446250	1.0114	0.0163514	-0.0662016	0.83755
P68134	Actin, alpha skeletal muscle;Actin, alpha cardiac muscle 1;Actin, aortic smooth muscle;Actin, gamma-enteric smooth muscle	Acta1	3	173440000	166060000	170550000	98123000	115530000	190660000	169610000	97816000	114170000	60600000	132410000	57057000	160090000	65569000	79760000	172020000	152043250	91059250	1.66972	0.739604	0.793705	0.0508127	143404000	119359750	1.20144	0.264769	0.294551	0.40291	119359750	91059250	1.31079	0.390439	0.433357	0.419652	143404000	152043250	0.943179	-0.0843965	0.164086	0.739786	143404000	91059250	1.57484	0.655208	0.876334	0.0871
O55134	Protocadherin-12	Pcdh12	3	2850300	2450600	3492300	2523900	2229600	2325500	3006500	2466500	2078700	501620	1475600	530222	2299800	3644100	343632	2424200	2829275	1.14654e+06	2.46767	1.30315	1.6262	0.0129903	2507025	2.17793e+06	1.1511	0.203017	0.202158	0.385048	NA	NA	NA	NA	NA	NA	2507025	2829275	0.886102	-0.174456	0.0446411	0.38582	2507025	1.14654e+06	2.18661	1.1287	1.57489	0.0197272
Q9Z1R3	Apolipoprotein M	Apom	3	230460000	342030000	353070000	404840000	258260000	461980000	535070000	392960000	346100000	388690000	367110000	400660000	549240000	552850000	488620000	205100000	332600000	375640000	0.885422	-0.175563	-0.55822	0.336751	412067500	448952500	0.917842	-0.123682	-0.286646	0.857573	448952500	375640000	1.19517	0.257212	0.298685	0.648155	412067500	332600000	1.23893	0.309093	0.685965	0.330432	412067500	375640000	1.09697	0.13353	0.106678	0.731298
F8VQL0	Receptor protein-tyrosine kinase;Hepatocyte growth factor receptor	Met	3	4041600	3307700	3209300	3044200	3371500	3852900	3458200	2505100	1808700	3509100	2840000	2839100	4168600	3871900	3372500	3630300	3400700	2749225	1.23697	0.306807	0.154357	0.17713	3296925	3760825	0.876649	-0.189928	-0.385763	0.292056	3760825	2749225	1.36796	0.452024	0.49561	0.0579741	3296925	3400700	0.969484	-0.0447107	0.216721	0.785915	3296925	2749225	1.19922	0.262096	0.296357	0.284521
Q922D8	C-1-tetrahydrofolate synthase, cytoplasmic;Methylenetetrahydrofolate dehydrogenase;Methenyltetrahydrofolate cyclohydrolase;Formyltetrahydrofolate synthetase;C-1-tetrahydrofolate synthase, cytoplasmic, N-terminally processed	Mthfd1	3	540500	219260	331500	401400	243840	471740	481070	227860	587669	224360	286870	643850	174860	176940	217530	650890	373165	435687	0.856497	-0.223479	-0.629005	0.723835	356128	305055	1.16742	0.223324	0.232542	0.449074	305055	435687	0.70017	-0.514224	-0.481118	0.278721	356128	373165	0.954343	-0.0674198	0.186602	0.831859	356128	435687	0.817392	-0.290899	-0.519503	0.600776
Q60692	Proteasome subunit beta type-6	Psmb6	3	10997000	7892900	6893400	6512800	9302700	16848000	6689100	5194300	7195300	4806700	5683800	4496100	6242300	6542700	5697000	9352900	8074025	5545475	1.45597	0.541977	0.501762	0.0515961	9508525	6958725	1.36642	0.450399	0.572289	0.390814	6958725	5545475	1.25485	0.327512	0.369747	0.185559	9508525	8074025	1.17767	0.235934	0.588935	0.752788	9508525	5545475	1.71465	0.777911	1.05736	0.113782
Q9QX15	Calcium-activated chloride channel regulator 3A-1	Clca3a1	3	4182300	2809200	3237700	2242000	2723000	3577000	3057200	2317300	2529500	1942600	5347500	2077100	2300200	2651800	2046000	3732500	3117800	2974175	1.04829	0.0680388	-0.198361	0.666804	2918625	2682625	1.08797	0.121643	0.080408	0.562667	2682625	2974175	0.901973	-0.148844	-0.111776	0.877112	2918625	3117800	0.936117	-0.0952395	0.149705	0.756219	2918625	2974175	0.981323	-0.0272007	-0.130456	0.809769
P05366	Serum amyloid A-1 protein	Saa1	3	21547000	62857000	38281000	13588000	24623000	9097800	13497000	14831000	27662000	23398000	26027000	6781300	46584000	45381000	8784400	7019600	34068250	20967075	1.62485	0.700302	0.735647	0.317578	15512200	26942250	0.575757	-0.796467	-1.29326	0.594085	26942250	20967075	1.28498	0.361745	0.404352	0.953215	15512200	34068250	0.455327	-1.13502	-1.22935	0.082161	15512200	20967075	0.739836	-0.434722	-0.731692	0.526226
P34928	Apolipoprotein C-I;Truncated apolipoprotein C-I	Apoc1	3	1552300000	4002900000	3242500000	3327000000	2146400000	1361700000	1854200000	2066900000	4040400000	3457600000	2293900000	1693500000	3314000000	3194100000	2359400000	1181600000	3031175000	2871350000	1.05566	0.0781479	-0.183428	0.848336	1857300000	2512275000	0.73929	-0.435788	-0.753616	0.342003	2512275000	2871350000	0.874946	-0.192735	-0.156142	0.607311	1857300000	3031175000	0.612733	-0.70667	-0.661228	0.07563	1857300000	2871350000	0.646839	-0.628522	-1.01761	0.102838
G5E8M9	Intercellular adhesion molecule 2	Icam2	3	6393700	3439900	4251900	3243800	3102700	6471700	5815800	2903700	4020900	4239200	3884300	3358600	3405200	5527100	2575900	3715400	4332325	3875750	1.1178	0.160666	-0.0615283	0.64972	4573475	3805900	1.20168	0.265053	0.294976	0.529221	3805900	3875750	0.981978	-0.0262379	0.0121606	0.759596	4573475	4332325	1.05566	0.0781493	0.379668	0.910329	4573475	3875750	1.18002	0.238815	0.26201	0.624306
A0A286YDL1	Protein-tyrosine-phosphatase;Receptor-type tyrosine-protein phosphatase mu	Ptprm	3	4441200	4110800	4217800	3357000	3296700	4837800	4613400	3406500	4060600	501620	5047400	3840500	2649800	4838600	3906500	3662100	4031700	3362530	1.19901	0.261841	0.0879323	0.363981	4038600	3764250	1.07288	0.101493	0.0502588	0.644821	3764250	3362530	1.11947	0.162815	0.203264	0.460313	4038600	4031700	1.00171	0.00246697	0.279292	0.956253	4038600	3362530	1.20106	0.264308	0.299621	0.36938
Q9R0Y5	Adenylate kinase isoenzyme 1	Ak1	3	3851500	1493500	4415100	1924700	1811900	2656900	513831	1179400	1025900	501620	3708200	5489900	3569500	1868000	2765700	5312900	2921200	2681405	1.08943	0.123572	-0.116325	0.504583	1.54051e+06	3379025	0.455903	-1.1332	-1.79708	0.0429753	3379025	2681405	1.26017	0.333618	0.37592	0.325922	1.54051e+06	2921200	0.527354	-0.923155	-0.948349	0.105753	NA	NA	NA	NA	NA	NA
E9Q2T3	Tenascin XB	Tnxb	3	5246700	5344800	4134500	427232	3305300	4010300	3398000	2469800	3018000	2585200	3388300	3550200	3353500	3315600	3408700	4082300	3.78831e+06	3135425	1.20823	0.272893	0.104258	0.779202	3295850	3540025	0.931024	-0.103109	-0.255865	0.545522	3540025	3135425	1.12904	0.175099	0.215681	0.289885	3295850	3.78831e+06	0.870006	-0.200903	0.00956482	0.716625	3295850	3135425	1.05117	0.0719896	0.015884	0.770204
O08689	Growth/differentiation factor 8	Mstn	3	3334400	1510600	1311200	1214600	1888400	2030300	2877700	1888400	2920900	1347600	1072400	931780	1820500	1085600	1709300	4242300	1842700	1568170	1.17506	0.232739	0.0449416	0.588324	2171200	2214425	0.98048	-0.0284395	-0.144145	0.740735	2214425	1568170	1.41211	0.49785	0.541933	0.377826	2171200	1842700	1.17827	0.236671	0.589914	0.34015	2171200	1568170	1.38454	0.469411	0.602218	0.141092
Q3TCF3	L-selectin	Sell	3	69489000	35193000	44004000	33082000	30307000	62386000	43872000	34356000	32706000	30115000	42682000	26775000	46472000	39833000	29842000	48770000	45442000	33069500	1.37414	0.458525	0.378483	0.171197	42730250	41229250	1.03641	0.0515895	-0.0244061	0.942315	41229250	33069500	1.24675	0.318167	0.360301	0.193442	42730250	45442000	0.940325	-0.0887686	0.158287	0.80538	42730250	33069500	1.29213	0.369757	0.455194	0.248819
E9QP56	Apolipoprotein C-III	Apoc3	3	1044100000	2358100000	2828300000	1773800000	1922200000	1041800000	2476400000	1822000000	2656500000	1985000000	1908900000	1234100000	2400600000	2325800000	1843700000	772440000	2001075000	1946125000	1.02824	0.0401709	-0.239529	0.995628	1815600000	1835635000	0.989086	-0.0158328	-0.125283	0.914934	1835635000	1946125000	0.943226	-0.0843252	-0.0465568	0.704714	1815600000	2001075000	0.907312	-0.140329	0.0899035	0.771117	1815600000	1946125000	0.932931	-0.100158	-0.238093	0.737041
H7BXC3	Triosephosphate isomerase	Tpi1	3	11929000	6330400	7990000	7466700	6686500	12162000	10173000	5252600	4434800	501620	13975000	24506000	7313400	8717100	6211800	9039200	8429025	10854355	0.776557	-0.364836	-0.837824	0.582209	8568525	7820375	1.09567	0.131809	0.0956177	0.815423	7820375	10854355	0.720483	-0.472964	-0.439411	0.62742	8568525	8429025	1.01655	0.0236811	0.307428	0.968357	8568525	10854355	0.789409	-0.341155	-0.593648	0.588079
O35955	Proteasome subunit beta type-10	Psmb10	3	11475000	5375500	5290900	5181300	6765500	11952000	7336500	5959400	3658800	6848200	6903300	4890700	6190000	5680300	4893300	7633100	6830675	5575250	1.22518	0.292992	0.133949	0.479017	8003350	6099175	1.3122	0.39199	0.484898	0.198106	6099175	5575250	1.09397	0.129578	0.169666	0.550423	8003350	6830675	1.17168	0.228576	0.579177	0.446267	8003350	5575250	1.43551	0.521568	0.679168	0.124505
Q91X17	Uromodulin;Uromodulin, secreted form	Umod	3	10274000	9777500	14619000	9789000	8430300	10396000	14970000	9545900	10622000	10810000	9314800	7181600	13224000	11245000	7397600	11311000	11114875	9482100	1.1722	0.229213	0.0397328	0.311639	10835550	10794400	1.00381	0.00548933	-0.0933809	0.992767	10794400	9482100	1.1384	0.187005	0.227716	0.470794	10835550	11114875	0.974869	-0.0367193	0.227319	0.837848	10835550	9482100	1.14274	0.192494	0.19367	0.475022
Q9QUN9	Dickkopf-related protein 3	Dkk3	3	6670700	2821800	3794300	3659600	5273400	4354100	4885900	2426300	3314900	2501700	3183300	3732000	3581300	5350600	3205200	4107700	4236600	3182975	1.33102	0.412531	0.310538	0.246272	4234925	4061200	1.04278	0.0604303	-0.0111786	0.92635	4061200	3182975	1.27591	0.35153	0.394026	0.14722	4234925	4236600	0.999605	-0.000570503	0.275263	0.966646	4234925	3182975	1.33049	0.411961	0.51746	0.223943
Q9D1B1	Cystatin E/M	Cst6	3	10153000	7944700	325894	7953700	9126700	9051600	7091000	6804500	6386800	5930300	5986600	6876800	12014000	11051000	343632	6335300	6.59432e+06	6295125	1.04753	0.0669897	-0.199911	0.512126	8018450	7.43598e+06	1.07833	0.1088	0.0611916	0.393837	7.43598e+06	6295125	1.18123	0.240288	0.281578	0.58777	8018450	6.59432e+06	1.21596	0.282099	0.650164	0.329982	8018450	6295125	1.27376	0.349088	0.424701	0.08126
O35744	Chitinase-like protein 3	Chil3	3	6735200	6008200	8167900	427232	10381000	5309400	8047900	6109200	4981000	4366100	456769	5388300	7861700	324417	5198500	8929000	NA	NA	NA	NA	NA	NA	7461875	5.5784e+06	1.33764	0.419686	0.526336	0.287398	NA	NA	NA	NA	NA	NA	7461875	5.33463e+06	1.39876	0.484149	0.918141	0.265701	7461875	3.79804e+06	1.96466	0.974282	1.34708	0.107258
Q9D7Q1	Chitotriosidase-1	Chit1	3	3792500	4198600	5304100	427232	3510600	2903300	513831	576028	2996000	2854000	2794600	2048300	3880400	324417	3217500	1940800	3.43061e+06	2673225	1.28332	0.359883	0.232764	0.889421	NA	NA	NA	NA	NA	NA	2.34078e+06	2673225	0.875639	-0.191592	-0.154987	0.397815	NA	NA	NA	NA	NA	NA	1.87594e+06	2673225	0.701752	-0.510968	-0.844181	0.169595
A0A0B4J1J6	Immunoglobulin heavy variable 10-1 (Fragment)	Ighv10-1	3	19459000	1706900	12218000	427232	1501800	1405100	1299600	1046100	1403800	501620	1735000	530222	1313900	324417	343632	4602700	NA	NA	NA	NA	NA	NA	1313150	1.64616e+06	0.797704	-0.326075	-0.589465	0.529956	NA	NA	NA	NA	NA	NA	1313150	8.45278e+06	0.155351	-2.68639	-3.28691	0.217405	1313150	1.04266e+06	1.25942	0.332762	0.400614	0.254379
A0A075B5S1	Immunoglobulin heavy variable 9-1	Ighv9-1	3	641524	617507	325894	427232	299513	415732	513831	576028	587669	501620	456769	530222	387778	324417	343632	397664	NA	NA	NA	NA	NA	NA	NA	NA	NA	NA	NA	NA	NA	NA	NA	NA	NA	NA	NA	NA	NA	NA	NA	NA	NA	NA	NA	NA	NA	NA
A0A140T8M5	Immunoglobulin kappa variable 6-15 (Fragment)	Igkv6-15	3	641524	617507	325894	427232	299513	415732	513831	576028	587669	501620	456769	530222	387778	324417	343632	397664	NA	NA	NA	NA	NA	NA	NA	NA	NA	NA	NA	NA	NA	NA	NA	NA	NA	NA	NA	NA	NA	NA	NA	NA	NA	NA	NA	NA	NA	NA
Q02053	Ubiquitin-like modifier-activating enzyme 1	Uba1	3	641524	617507	325894	427232	299513	415732	513831	576028	587669	501620	456769	3182400	387778	324417	343632	3046600	NA	NA	NA	NA	NA	NA	NA	NA	NA	NA	NA	NA	NA	NA	NA	NA	NA	NA	NA	NA	NA	NA	NA	NA	NA	NA	NA	NA	NA	NA
Q7TPZ8	Carboxypeptidase A1	Cpa1	3	641524	617507	325894	427232	299513	415732	513831	576028	587669	501620	456769	530222	387778	324417	343632	397664	NA	NA	NA	NA	NA	NA	NA	NA	NA	NA	NA	NA	NA	NA	NA	NA	NA	NA	NA	NA	NA	NA	NA	NA	NA	NA	NA	NA	NA	NA
P16460	Argininosuccinate synthase	Ass1	3	4046400	617507	325894	427232	299513	415732	513831	576028	587669	501620	456769	19394000	387778	324417	343632	397664	NA	NA	NA	NA	NA	NA	NA	NA	NA	NA	NA	NA	NA	NA	NA	NA	NA	NA	NA	NA	NA	NA	NA	NA	NA	NA	NA	NA	NA	NA
A0A075B6A3	Immunoglobulin heavy constant alpha (Fragment)	Igha	3	12247000	617507	325894	427232	299513	415732	513831	576028	587669	501620	1291500	530222	387778	324417	343632	994930	NA	NA	NA	NA	NA	NA	NA	NA	NA	NA	NA	NA	NA	NA	NA	NA	NA	NA	NA	NA	NA	NA	NA	NA	NA	NA	NA	NA	NA	NA
Q8BH00	Aldehyde dehydrogenase family 8 member A1	Aldh8a1	3	4576900	2520800	3654600	427232	299513	415732	513831	576028	587669	501620	456769	4362500	387778	324417	343632	397664	NA	NA	NA	NA	NA	NA	NA	NA	NA	NA	NA	NA	NA	NA	NA	NA	NA	NA	NA	NA	NA	NA	NA	NA	NA	NA	NA	NA	NA	NA
P52760	Ribonuclease UK114	Hrsp12	3	641524	617507	1835900	2004600	2831600	415732	513831	576028	587669	501620	2178100	8321700	387778	324417	1569800	5049600	NA	NA	NA	NA	NA	NA	NA	NA	NA	NA	NA	NA	NA	NA	NA	NA	NA	NA	NA	NA	NA	NA	NA	NA	NA	NA	NA	NA	NA	NA
A0A140T8P6	Immunoglobulin kappa variable 12-46 (Fragment)	Igkv12-46	3	61219000	1549900	325894	483530	299513	496190	513831	576028	587669	501620	456769	530222	387778	324417	343632	397664	NA	NA	NA	NA	NA	NA	NA	NA	NA	NA	NA	NA	NA	NA	NA	NA	NA	NA	NA	NA	NA	NA	NA	NA	NA	NA	NA	NA	NA	NA
A0A0U1RNJ1	Fatty acid synthase;[Acyl-carrier-protein] S-acetyltransferase;[Acyl-carrier-protein] S-malonyltransferase;3-oxoacyl-[acyl-carrier-protein] synthase;3-oxoacyl-[acyl-carrier-protein] reductase;3-hydroxyacyl-[acyl-carrier-protein] dehydratase;Enoyl-[acyl-carrier-protein] reductase;Oleoyl-[acyl-carrier-protein] hydrolase	Fasn	3	957650	617507	600390	427232	299513	1623000	513831	576028	587669	501620	1339200	2618800	387778	324417	343632	1068800	NA	NA	NA	NA	NA	NA	NA	NA	NA	NA	NA	NA	NA	NA	NA	NA	NA	NA	NA	NA	NA	NA	NA	NA	NA	NA	NA	NA	NA	NA
B2RXS4	Plexin-B2	Plxnb2	3	5391900	3163900	325894	2788800	299513	415732	3374300	576028	1956900	501620	3480500	3361000	387778	2933900	2570400	2953900	NA	NA	NA	NA	NA	NA	NA	NA	NA	NA	NA	NA	NA	NA	NA	NA	NA	NA	NA	NA	NA	NA	NA	NA	NA	NA	NA	NA	NA	NA
Q3TYU0	Hepatic triacylglycerol lipase	Lipc	3	641524	617507	5609300	5994500	299513	415732	6617400	576028	7328300	6634300	456769	5729000	387778	4995200	343632	397664	NA	NA	NA	NA	NA	NA	NA	NA	NA	NA	NA	NA	NA	NA	NA	NA	NA	NA	NA	NA	NA	NA	NA	NA	NA	NA	NA	NA	NA	NA
F8WH29	Fibrocystin-L	Pkhd1l1	3	2140900	2621400	325894	2788800	299513	3663100	513831	2433400	587669	501620	3940300	3364600	1960000	3221000	343632	3245900	NA	NA	NA	NA	NA	NA	NA	NA	NA	NA	NA	NA	NA	NA	NA	NA	NA	NA	NA	NA	NA	NA	NA	NA	NA	NA	NA	NA	NA	NA
P05555	Integrin alpha-M	Itgam	3	4978800	5146900	325894	3763200	299513	3845500	3587800	2499200	587669	2706200	2501500	530222	4155900	2679900	343632	3653500	NA	NA	NA	NA	NA	NA	NA	NA	NA	NA	NA	NA	NA	NA	NA	NA	NA	NA	NA	NA	NA	NA	NA	NA	NA	NA	NA	NA	NA	NA
D3Z090	Macrophage colony-stimulating factor 1;Processed macrophage colony-stimulating factor 1	Csf1	3	5226900	3852500	325894	2691800	299513	3885300	513831	2540400	2992500	3328300	456769	3691000	4350000	4988700	2996400	397664	NA	NA	NA	NA	NA	NA	NA	NA	NA	NA	NA	NA	NA	NA	NA	NA	NA	NA	NA	NA	NA	NA	NA	NA	NA	NA	NA	NA	NA	NA
B1ARB3	Platelet endothelial cell adhesion molecule	Pecam1	3	4650500	617507	325894	427232	299513	5210200	513831	3181900	5416800	5111200	456769	530222	5158900	4403100	343632	4031200	NA	NA	NA	NA	NA	NA	NA	NA	NA	NA	NA	NA	NA	NA	NA	NA	NA	NA	NA	NA	NA	NA	NA	NA	NA	NA	NA	NA	NA	NA
Q9JHI0	Matrix metalloproteinase-19	Mmp19	3	641524	617507	325894	427232	4920500	415732	513831	5674000	4974200	501620	456769	530222	3693600	324417	343632	397664	NA	NA	NA	NA	NA	NA	NA	NA	NA	NA	NA	NA	NA	NA	NA	NA	NA	NA	NA	NA	NA	NA	NA	NA	NA	NA	NA	NA	NA	NA
Q2VLH6	Scavenger receptor cysteine-rich type 1 protein M130;Soluble CD163	Cd163	3	641524	8051300	9696900	427232	299513	7732400	9052800	6807100	587669	501620	7901900	7370600	11158000	10226000	7997500	397664	NA	NA	NA	NA	NA	NA	NA	NA	NA	NA	NA	NA	NA	NA	NA	NA	NA	NA	NA	NA	NA	NA	NA	NA	NA	NA	NA	NA	NA	NA
A0A0U1RPF4	Hepcidin-2	Hamp2	2	4566500	3613200	9160400	3782000	299513	2256700	3643700	576028	3898100	4889200	2717300	2911300	2492400	324417	343632	397664	5280525	3603975	1.46519	0.551092	0.515227	0.20275	NA	NA	NA	NA	NA	NA	889529	3603975	0.246819	-2.01848	-2.00169	0.00442299	1.69399e+06	5280525	0.320799	-1.64026	-1.89944	0.0232406	1.69399e+06	3603975	0.470032	-1.08917	-1.69723	0.0580869
A0A075B5R5	Immunoglobulinheavy chain V region 441;Immunoglobulinheavy chain V region MOPC 173;Immunoglobulinheavy chain V region J539;Immunoglobulinheavy chain V region T601;Immunoglobulinheavy chain V region X44	Ighv4-1	2	26044000	4889800	8314400	4748100	299513	9487900	513831	576028	587669	501620	2974800	4388400	387778	324417	343632	3008100	10999075	2.11312e+06	5.20513	2.37993	3.21687	0.0192998	NA	NA	NA	NA	NA	NA	NA	NA	NA	NA	NA	NA	2.71932e+06	10999075	0.247232	-2.01607	-2.39786	0.0197849	NA	NA	NA	NA	NA	NA
P13609	Serglycin	Srgn	2	641524	617507	5572200	427232	299513	5403200	513831	576028	587669	501620	23006000	14734000	3939400	5530100	4924600	6704100	NA	NA	NA	NA	NA	NA	1.69814e+06	5274550	0.32195	-1.63509	-2.548	0.0114755	5274550	9.70732e+06	0.543358	-0.880025	-0.850888	0.602467	NA	NA	NA	NA	NA	NA	NA	NA	NA	NA	NA	NA
E9Q704	Peptidyl-glycine alpha-amidating monooxygenase;Peptidylglycine alpha-hydroxylating monooxygenase;Peptidyl-alpha-hydroxyglycine alpha-amidating lyase	Pam	2	4452000	3482300	2982400	2412700	2744600	3504100	2726200	3411600	2400400	2990400	2863200	2632000	387778	324417	1012700	2880600	3332350	2721500	1.22445	0.292138	0.132688	0.253344	3096625	1.15137e+06	2.6895	1.42734	2.03398	0.0143842	1.15137e+06	2721500	0.423066	-1.24105	-1.21582	0.0254209	3096625	3332350	0.929262	-0.105843	0.135641	0.731262	3096625	2721500	1.13784	0.186295	0.184524	0.312347
P20065-2	Isoform Short of Thymosin beta-4	Tmsb4x	2	21182000	19115000	18375000	13102000	8743300	6040400	10505000	7611100	8001600	2820700	9588900	3076400	8617900	1281400	3438600	11140000	17943500	5871900	3.05583	1.61156	2.0818	0.0038954	8224950	6119475	1.34406	0.426599	0.53668	0.22829	6119475	5871900	1.04216	0.0595805	0.0989098	0.833366	8224950	17943500	0.45838	-1.12538	-1.21656	0.00122707	8224950	5871900	1.40073	0.48618	0.626958	0.171981
P11152	Lipoprotein lipase	Lpl	2	4349000	4762100	5232100	3717800	299513	5693000	513831	576028	7597700	4367800	456769	530222	387778	324417	343632	6231500	4515250	3.23812e+06	1.3944	0.479648	0.409687	0.169006	NA	NA	NA	NA	NA	NA	NA	NA	NA	NA	NA	NA	1.77059e+06	4515250	0.392136	-1.35057	-1.51523	0.0183788	NA	NA	NA	NA	NA	NA
P30115	Glutathione S-transferase A3	Gsta3	2	14526000	19702000	9891200	15120000	20974000	20771000	23149000	20504000	21427000	12234000	19499000	23389000	21588000	22316000	21576000	21662000	14809800	19137250	0.773873	-0.369831	-0.845203	0.229259	21349500	21785500	0.979987	-0.0291659	-0.145232	0.82296	21785500	19137250	1.13838	0.186985	0.227696	0.324096	21349500	14809800	1.44158	0.52765	0.975835	0.0336307	21349500	19137250	1.1156	0.157819	0.142512	0.408655
P30412	Peptidyl-prolyl cis-trans isomerase C	Ppic	2	4781400	5562300	5119200	3809400	6897600	6726600	5170000	4398300	4406300	4270600	7753600	3892100	7267900	7445800	6359800	5526500	4818075	5080650	0.948319	-0.0765562	-0.411964	0.900693	5798125	6650000	0.871898	-0.197768	-0.397493	0.326832	6650000	5080650	1.30889	0.388341	0.431237	0.115287	5798125	4818075	1.20341	0.26713	0.63031	0.264527	5798125	5080650	1.14122	0.190573	0.190836	0.436131
Q64739-7	Collagen alpha-2(XI) chain	Col11a2	2	2373600	2521200	3544200	2074000	4025000	4756100	4072400	2963100	1938000	501620	3676200	3302700	4398200	4150700	3226400	3359900	2628250	2354630	1.11621	0.158602	-0.064577	0.461885	3954150	3783800	1.04502	0.0635318	-0.00653825	0.788186	3783800	2354630	1.60696	0.684335	0.730441	0.130268	3954150	2628250	1.50448	0.589265	1.05755	0.0305767	3954150	2354630	1.67931	0.747867	1.01304	0.112751
A0A075B663	Immunoglobulinlambda-1 chain V region;Immunoglobulinlambda-1 chain V region S43;Immunoglobulinlambda-2 chain V region MOPC 315;Immunoglobulinlambda-1 chain V region H2020	Iglv1	2	16999000	7063800	10968000	5279900	6379200	9313900	513831	576028	7808800	5955900	6284400	11229000	5220800	324417	6203200	397664	10077675	7819525	1.28878	0.36601	0.241815	0.510395	NA	NA	NA	NA	NA	NA	3.03652e+06	7819525	0.388325	-1.36466	-1.34078	0.0503821	4.19574e+06	10077675	0.41634	-1.26417	-1.40063	0.064395	4.19574e+06	7819525	0.536572	-0.898156	-1.41542	0.0936403
Q61598-2	Rab GDP dissociation inhibitor beta	Gdi2	2	2924300	1159800	2216500	2281400	1648700	2171400	3464600	576028	1178800	501620	3683600	4124100	387778	324417	343632	3157000	2145500	2372030	0.9045	-0.144808	-0.512789	0.746532	NA	NA	NA	NA	NA	NA	NA	NA	NA	NA	NA	NA	1965182	2145500	0.915955	-0.126651	0.108044	0.577977	NA	NA	NA	NA	NA	NA
Q3V2T4-2	Keratinocyte differentiation-associated protein	Krtdap	2	5975300	10040000	13008000	7691300	8919900	3649700	8529500	4159400	6271400	4162100	8245700	4790100	8442600	6110300	3465300	4666000	9178650	5867325	1.56437	0.645579	0.654807	0.0768706	6314625	5671050	1.11348	0.155081	0.130437	0.773413	5671050	5867325	0.966548	-0.049087	-0.0109364	0.822497	6314625	9178650	0.687969	-0.539585	-0.439625	0.155542	6314625	5867325	1.07624	0.105994	0.0660526	0.915435
P14211	Calreticulin	Calr	2	1050100	1176900	999510	1207100	1579000	1604900	1202700	576028	1179000	853570	1275700	1211600	954150	324417	343632	1186200	1.1084e+06	1.12997e+06	0.980915	-0.0277994	-0.339938	0.932732	NA	NA	NA	NA	NA	NA	702100	1.12997e+06	0.621345	-0.686533	-0.655297	0.0851495	1240657	1.1084e+06	1.11932	0.162622	0.491704	0.862565	1240657	1.12997e+06	1.09796	0.134823	0.108585	0.903234
O88668	Protein CREG1	Creg1	2	6673300	4150300	4421800	4228500	299513	3881500	3583600	3132100	587669	6039700	5275700	3036600	387778	2765800	2370400	4350200	4868475	3.73492e+06	1.3035	0.382394	0.266018	0.293768	NA	NA	NA	NA	NA	NA	NA	NA	NA	NA	NA	NA	2.72418e+06	4868475	0.559555	-0.837649	-0.834943	0.128866	NA	NA	NA	NA	NA	NA
P07361	Alpha-1-acid glycoprotein 2	Orm2	2	113570000	218380000	84658000	108650000	66747000	53651000	58823000	50858000	72831000	104950000	90379000	36399000	102750000	112790000	41894000	44759000	131314500	76139750	1.72465	0.786304	0.862693	0.0909499	57519750	75548250	0.761364	-0.393341	-0.690107	0.496236	75548250	76139750	0.992231	-0.0112515	0.0273095	0.912377	57519750	131314500	0.43803	-1.1909	-1.30345	0.00521963	57519750	76139750	0.75545	-0.404592	-0.68724	0.379007
Q8VI78	Phospholipase A1 member A	Pla1a	2	3262700	3308900	325894	427232	2868200	2893200	513831	576028	2496300	3335400	4491200	3354400	2491300	3540100	3220500	3461800	1.83118e+06	3419325	0.535539	-0.900937	-1.62978	0.0912215	1.71281e+06	3178425	0.538888	-0.891943	-1.43611	0.0625447	3178425	3419325	0.929547	-0.1054	-0.0678597	0.69621	NA	NA	NA	NA	NA	NA	1.71281e+06	3419325	0.500922	-0.997342	-1.56175	0.0565686
O89017	Legumain	Lgmn	2	3765500	2573200	3229700	3265500	3218400	415732	513831	2192000	587669	501620	3332200	530222	387778	324417	3210200	3584000	3208475	1.23793e+06	2.59181	1.37396	1.7308	0.0141231	NA	NA	NA	NA	NA	NA	NA	NA	NA	NA	NA	NA	1.58499e+06	3208475	0.494001	-1.01741	-1.07336	0.0477622	NA	NA	NA	NA	NA	NA
E9Q9Z9	Dentin sialophosphoprotein;Dentin phosphoprotein;Dentin sialoprotein	Dspp	2	6368100	6571400	5264400	6016900	5368100	9725000	6820600	4754900	6348800	4684900	6564300	4520200	6347200	7033000	7096300	11147000	6055200	5529550	1.09506	0.131013	-0.105334	0.445999	6667150	7905875	0.843316	-0.245855	-0.46944	0.371161	7905875	5529550	1.42975	0.515763	0.56004	0.0652439	6667150	6055200	1.10106	0.138896	0.460235	0.726313	6667150	5529550	1.20573	0.269908	0.307883	0.405596
Q64695	Endothelial protein C receptor	Procr	2	6029400	5435200	4184200	5194600	4515800	5635300	4010600	4526900	3626200	3674700	5064600	3465700	3952900	4170100	3465100	5255400	5210850	3957800	1.3166	0.39682	0.287329	0.0676924	4672150	4210875	1.10954	0.149967	0.122785	0.433425	4210875	3957800	1.06394	0.0894213	0.129074	0.655663	4672150	5210850	0.89662	-0.157432	0.0672197	0.424471	4672150	3957800	1.18049	0.239388	0.262855	0.238777
H7BWZ3	Actin-related protein 2/3 complex subunit 3	Arpc3	2	641524	1281600	2342600	427232	1684800	3275600	1589800	1383200	587669	501620	1585200	1163300	1619800	1753400	1526600	1696200	NA	NA	NA	NA	NA	NA	1983350	1649000	1.20276	0.266348	0.296914	0.52534	1649000	959447	1.7187	0.781316	0.828474	0.0352052	1983350	1.17324e+06	1.69049	0.757443	1.28061	0.107979	1983350	959447	2.06718	1.04766	1.45534	0.0345052
E9PX70	Collagen alpha-1(XII) chain	Col12a1	2	2977700	2022900	325894	1785300	299513	3264000	2805700	2332500	587669	501620	2311100	530222	2435800	3610700	1793000	3382600	NA	NA	NA	NA	NA	NA	2.17543e+06	2805525	0.775409	-0.366971	-0.650654	0.326548	2805525	982653	2.85505	1.51352	1.56862	0.00903996	NA	NA	NA	NA	NA	NA	NA	NA	NA	NA	NA	NA
A0A0A0MQA3	Alpha-1-antitrypsin 1-1	Serpina1a	2	201180000	222360000	317070000	239260000	237680000	197540000	285670000	172050000	150570000	152280000	219880000	201360000	214120000	224260000	70225000	205940000	244967500	181022500	1.35324	0.436421	0.34583	0.0743591	223235000	178636250	1.24966	0.321538	0.379489	0.302334	178636250	181022500	0.986818	-0.0191442	0.0193312	0.737086	223235000	244967500	0.911284	-0.134027	0.0982614	0.554328	223235000	181022500	1.23319	0.302394	0.355811	0.227084
Q05020	Apolipoprotein C-II	Apoc2	2	106020000	255650000	281580000	280990000	208330000	87468000	281190000	203610000	181660000	161870000	199800000	133100000	250390000	54154000	164490000	119370000	231060000	169107500	1.36635	0.450327	0.366372	0.320852	195149500	147101000	1.32664	0.407773	0.508512	0.372919	147101000	169107500	0.869867	-0.201134	-0.164632	0.405215	195149500	231060000	0.844584	-0.243688	-0.0471801	0.576307	195149500	169107500	1.154	0.206639	0.214539	0.779158
Q9Z126	Platelet factor 4	Pf4	2	10573000	2238400	52859000	29349000	45792000	36265000	15723000	9075900	9213600	501620	317230000	77188000	23503000	45831000	31350000	38974000	23754850	101033305	0.235119	-2.08854	-3.38415	0.844295	26713975	34914500	0.765126	-0.386232	-0.679471	0.261598	34914500	101033305	0.345574	-1.53293	-1.51088	0.635879	26713975	23754850	1.12457	0.169373	0.500657	0.511812	26713975	101033305	0.264408	-1.91916	-2.92176	0.887548
B0QZX1	Cytokine receptor common subunit gamma	Il2rg	2	641524	5865000	7121500	5377000	6161000	7998700	513831	576028	587669	5541500	6660800	5733600	7068300	5263300	6703600	7084000	NA	NA	NA	NA	NA	NA	3.81239e+06	6529800	0.583845	-0.776343	-1.26315	0.0987557	6529800	4.63089e+06	1.41005	0.495749	0.539809	0.240051	NA	NA	NA	NA	NA	NA	NA	NA	NA	NA	NA	NA
Q02596	Glycosylation-dependent cell adhesion molecule 1	Glycam1	2	52237000	29174000	32975000	32082000	42318000	47787000	35041000	20985000	22173000	22747000	38530000	20208000	33116000	33456000	21487000	29589000	36617000	25914500	1.41299	0.498754	0.437911	0.103344	36532750	29412000	1.2421	0.312785	0.366393	0.376521	29412000	25914500	1.13496	0.182645	0.223309	0.432963	36532750	36617000	0.997699	-0.00332324	0.271612	0.926446	36532750	25914500	1.40974	0.495431	0.640607	0.172372
M0QWA7	Integrin beta;Integrin beta-2	Itgb2	2	4356100	2663700	3335900	2827400	2306900	2492700	2957700	2659200	1875000	501620	2994800	530222	2217800	1817700	2418000	4334800	3295775	1.47541e+06	2.2338	1.1595	1.414	0.034342	2604125	2697075	0.965537	-0.0505969	-0.177297	0.930301	2697075	1.47541e+06	1.82802	0.870279	0.918402	0.0934679	2604125	3295775	0.79014	-0.339819	-0.174678	0.151032	2604125	1.47541e+06	1.76502	0.819682	1.11899	0.0684781
Q4LDF6	Complement factor H-related 2	Cfhr2	2	10595000	9489300	9111900	10371000	11853000	8205400	9681800	11208000	13964000	10563000	7476000	7359500	12369000	13474000	10157000	9357700	9891800	9840625	1.0052	0.00748312	-0.287817	0.81332	10237050	11339425	0.902784	-0.147547	-0.322353	0.471883	11339425	9840625	1.15231	0.204526	0.245427	0.364773	10237050	9891800	1.0349	0.0494951	0.341665	0.832432	10237050	9840625	1.04028	0.0569782	-0.00626299	0.719786
Q9DCD0	6-phosphogluconate dehydrogenase, decarboxylating	Pgd	2	5030700	3531300	5460400	3159900	3510400	4639800	3273400	2991000	2192400	501620	3515200	2947700	3246000	2985000	2801200	5135300	4295575	2289230	1.87643	0.907989	1.04245	0.0855836	3603650	3541875	1.01744	0.0249456	-0.0642705	0.846381	3541875	2289230	1.54719	0.629651	0.675164	0.172714	3603650	4295575	0.838921	-0.253392	-0.0600511	0.357667	3603650	2289230	1.57418	0.654596	0.875432	0.141991
Q61982	Neurogenic locus notch homolog protein 3;Notch 3 extracellular truncation;Notch 3 intracellular domain	Notch3	2	643210	438380	695170	802340	299513	755590	471380	603570	600640	501620	461730	377640	704930	348030	343632	716440	644775	485408	1.32832	0.409599	0.306207	0.134675	NA	NA	NA	NA	NA	NA	NA	NA	NA	NA	NA	NA	532513	644775	0.82589	-0.275979	-0.0900071	0.344571	NA	NA	NA	NA	NA	NA
Q8BRK9-2	Alpha-mannosidase 2x	Man2a2	2	2437300	1725500	2136600	2317100	1809900	1978600	1738500	576028	1721800	1334900	456769	1605200	2034000	1889800	343632	2718000	2154125	1.27967e+06	1.68335	0.751333	0.811032	0.065783	NA	NA	NA	NA	NA	NA	NA	NA	NA	NA	NA	NA	1525757	2154125	0.708295	-0.497577	-0.38391	0.146205	NA	NA	NA	NA	NA	NA
S4R2M7	Phosphoglycerate kinase;Phosphoglycerate kinase 1	Pgk1	2	4456400	3250500	6299700	3297600	2787500	7180900	4480500	3362500	2685200	501620	6290000	7466400	387778	4322600	4839600	5085100	4326050	4235805	1.02131	0.0304142	-0.253942	0.513187	4452850	3.65877e+06	1.21703	0.283371	0.322383	0.409679	NA	NA	NA	NA	NA	NA	4452850	4326050	1.02931	0.0416787	0.331298	0.99827	4452850	4235805	1.05124	0.0720928	0.0160364	0.515052
A0A0A6YW67	Ubiquitin-60S ribosomal protein L40;Ubiquitin;60S ribosomal protein L40;Ubiquitin-40S ribosomal protein S27a;Ubiquitin;40S ribosomal protein S27a;Polyubiquitin-B;Ubiquitin;Polyubiquitin-C;Ubiquitin;Ubiquitin-related 1;Ubiquitin-related 2	Gm8797;Uba52;Kxd1;Ubc;Ubb;Rps27a	2	9898400	3912400	7513500	7012200	4810400	10944000	12788000	5621200	587669	2214300	13286000	16306000	7440800	6345300	343632	12284000	7084125	8.09849e+06	0.874746	-0.193064	-0.584074	0.513123	8540900	6.60343e+06	1.2934	0.371172	0.45375	0.342048	NA	NA	NA	NA	NA	NA	8540900	7084125	1.20564	0.269798	0.63385	0.597646	8540900	8.09849e+06	1.05463	0.0767348	0.0228848	0.394791
P26043	Radixin	Rdx	2	16792000	17155000	17061000	14179000	13616000	15676000	12620000	12094000	18106000	14698000	16064000	10100000	16107000	15012000	14823000	14488000	16296750	14742000	1.10546	0.144652	-0.0851848	0.430132	13501500	15107500	0.893695	-0.162145	-0.344194	0.290701	15107500	14742000	1.02479	0.0353327	0.0743989	0.747311	13501500	16296750	0.828478	-0.271465	-0.0840201	0.126183	13501500	14742000	0.915853	-0.126813	-0.277418	0.65329
A0A0G2JE99	Immunoglobulinlambda-1 chain C region	Iglc1	2	13091000	5387200	8318500	7595000	6066400	7431400	5099600	3695300	7252000	5433600	4303300	16761000	4008200	7053300	3537700	15505000	8597925	8437475	1.01902	0.0271772	-0.258724	0.73384	5573175	7526050	0.740518	-0.433393	-0.750034	0.658014	7526050	8437475	0.891979	-0.164918	-0.128024	0.717421	5573175	8597925	0.6482	-0.625489	-0.553558	0.0974921	5573175	8437475	0.660526	-0.598312	-0.973044	0.347514
Q9WTR5	Cadherin-13	Cdh13	2	2311200	1192300	1678900	1177900	1587500	2715900	1488000	1264400	1060700	1166400	1793900	1252900	387778	1696600	1460300	2008100	1590075	1318475	1.206	0.270225	0.100317	0.40867	1763950	1.38819e+06	1.27068	0.3456	0.41549	0.351433	1.38819e+06	1318475	1.05288	0.0743394	0.113829	0.803829	1763950	1590075	1.10935	0.149715	0.474585	0.660127	1763950	1318475	1.33787	0.419939	0.529231	0.212638
A2APM2	CD44 antigen	Cd44	2	78430000	42751000	49003000	41500000	40606000	79525000	45818000	33776000	34970000	36288000	47962000	34624000	46159000	48147000	30903000	58176000	52921000	38461000	1.37597	0.460444	0.381317	0.120422	49931250	45846250	1.0891	0.123139	0.082646	0.800342	45846250	38461000	1.19202	0.253407	0.294839	0.339861	49931250	52921000	0.943505	-0.0838973	0.164748	0.735296	49931250	38461000	1.29823	0.376547	0.465212	0.303552
P62259	14-3-3 protein epsilon	Ywhae	2	6378900	2727700	3566500	3387300	3463200	4182700	4116600	2842300	587669	501620	4083000	4319700	2786000	3712200	2668900	4353100	4015100	2.373e+06	1.692	0.758725	0.821952	0.134535	3651200	3380050	1.08022	0.111326	0.0649713	0.593085	3380050	2.373e+06	1.42438	0.510334	0.554553	0.183254	3651200	4015100	0.909367	-0.137065	0.094232	0.791067	3651200	2.373e+06	1.53864	0.62166	0.826839	0.137923
P26645	Myristoylated alanine-rich C-kinase substrate	Marcks	2	1203300	1116500	1159700	1047400	1405700	1858100	1253300	783170	1093100	823360	935840	999490	1231000	1109900	1418600	1067700	1131725	962948	1.17527	0.232994	0.0453185	0.139481	1.32507e+06	1206800	1.098	0.134879	0.100211	0.780774	1206800	962948	1.25324	0.325658	0.367873	0.0778418	1.32507e+06	1131725	1.17084	0.227542	0.577806	0.550685	1.32507e+06	962948	1.37605	0.460537	0.589126	0.178014
E9Q3H7	Dynein, axonemal, heavy chain 6	Dnah6	2	4060200	5932000	3247600	3728300	4930700	4538200	4681300	3732900	5137800	5764600	6258400	4682200	5537500	4744100	5311800	2965000	4242025	5460750	0.776821	-0.364346	-0.837099	0.110084	4470775	4639600	0.963612	-0.0534755	-0.181604	0.931986	4639600	5460750	0.849627	-0.235099	-0.198966	0.280728	4470775	4242025	1.05392	0.0757718	0.376515	0.644582	4470775	5460750	0.818711	-0.288574	-0.516073	0.133026
Q61268	Apolipoprotein C-IV	Apoc4	2	143570000	379480000	395590000	306260000	331310000	162740000	366240000	348830000	367280000	259150000	250780000	206750000	318940000	311200000	290850000	144750000	306225000	270990000	1.13002	0.176352	-0.0383555	0.776414	302280000	266435000	1.13454	0.182102	0.170865	0.62625	266435000	270990000	0.983191	-0.024456	0.0139618	0.849794	302280000	306225000	0.987117	-0.0187065	0.25121	0.970069	302280000	270990000	1.11547	0.157646	0.142257	0.710171
P15327	Bisphosphoglycerate mutase;Phosphoglycerate mutase	Bpgm	2	11096000	1080500	4872100	5641300	5028200	12781000	21532000	2542400	3030900	671710	17060000	14953000	11873000	324417	1390400	18544000	5672475	8.9289e+06	0.635294	-0.654505	-1.26573	0.891404	10470900	8.03295e+06	1.30349	0.382383	0.470524	0.356291	8.03295e+06	8.9289e+06	0.899658	-0.152552	-0.115524	0.710367	10470900	5672475	1.84591	0.884335	1.4489	0.346481	10470900	8.9289e+06	1.1727	0.229831	0.248755	0.560268
Q923X1	EGF, latrophilin seven transmembrane domain-containing protein 1	Eltd1	2	6975800	6518900	5806000	3429100	3717300	5314500	5303100	3161200	2933400	4080700	4944400	3600300	6232400	6013400	3683600	5168300	5682450	3889700	1.4609	0.546854	0.508966	0.0956992	4374025	5274425	0.829289	-0.270052	-0.505644	0.306665	5274425	3889700	1.356	0.439355	0.482804	0.103697	4374025	5682450	0.769743	-0.377552	-0.224722	0.243593	4374025	3889700	1.12451	0.169303	0.159455	0.544131
P08905	Lysozyme C-2;Lysozyme C-1	Lyz2	2	12437000	9210200	12045000	8111800	9481400	9501300	9868000	4453900	9339800	8693200	29707000	9800500	13177000	12756000	6927900	8590300	10451000	14385125	0.726514	-0.460937	-0.979788	0.532476	8326150	10362800	0.803465	-0.315692	-0.57393	0.343425	10362800	14385125	0.720383	-0.473164	-0.439613	0.49833	8326150	10451000	0.796685	-0.32792	-0.158896	0.248011	8326150	14385125	0.578803	-0.788856	-1.25416	0.197524
Q3LFS7	Carcinoembryonic antigen-related cell adhesion molecule 1	Ceacam1	2	6718200	7267900	9161500	4924200	7969400	5199000	5375500	4203000	9161200	3794300	7038400	4178800	8150300	6708700	5631400	7062100	7017950	6043175	1.1613	0.215743	0.0198339	0.434101	5686725	6888125	0.825584	-0.276513	-0.515311	0.220508	6888125	6043175	1.13982	0.188805	0.229536	0.401781	5686725	7017950	0.810311	-0.303452	-0.126444	0.276197	5686725	6043175	0.941016	-0.0877087	-0.219726	0.927598
P27931	Interleukin-1 receptor type 2;Interleukin-1 receptor type 2, membrane form;Interleukin-1 receptor type 2, soluble form	Il1r2	2	11162000	5058800	5291900	5824300	7971600	11079000	7353400	5440000	5826800	3221200	5984100	5089300	5823400	6241800	6235100	7771400	6834250	5030350	1.3586	0.442124	0.354255	0.247126	7961000	6517925	1.2214	0.288537	0.330113	0.315416	6517925	5030350	1.29572	0.373754	0.416491	0.116876	7961000	6834250	1.16487	0.220167	0.568024	0.447298	7961000	5030350	1.58259	0.662291	0.886784	0.0526561
P10126	Elongation factor 1-alpha 1	Eef1a1	2	4789200	617507	4048600	4106500	4088000	5056700	27517000	3734500	587669	501620	4643600	6590100	5093000	324417	3274800	5847500	NA	NA	NA	NA	NA	NA	10099050	3.63493e+06	2.77833	1.47422	2.10412	0.176393	NA	NA	NA	NA	NA	NA	10099050	3.39045e+06	2.97867	1.57467	2.36448	0.146354	10099050	3.08075e+06	3.27812	1.71287	2.43675	0.0950971
Q64339	Ubiquitin-like protein ISG15	Isg15	2	3059600	617507	325894	3659400	2823500	5818400	6853600	3187000	587669	501620	7120500	6649900	4714200	324417	343632	7142700	NA	NA	NA	NA	NA	NA	4670625	3.13124e+06	1.49162	0.576883	0.761533	0.161211	NA	NA	NA	NA	NA	NA	4670625	1.9156e+06	2.4382	1.28582	1.98139	0.0496065	4670625	3.71492e+06	1.25726	0.330284	0.396958	0.261779
Q3UEL5	Urocanate hydratase	Uroc1	2	641524	437170	429050	304170	299513	415732	513831	576028	587669	501620	456769	1330400	387778	324417	343632	397664	NA	NA	NA	NA	NA	NA	NA	NA	NA	NA	NA	NA	NA	NA	NA	NA	NA	NA	NA	NA	NA	NA	NA	NA	NA	NA	NA	NA	NA	NA
E9QN70	Laminin subunit beta-1	Lamb1	2	641524	617507	325894	427232	299513	415732	513831	576028	587669	501620	456769	530222	387778	324417	343632	397664	NA	NA	NA	NA	NA	NA	NA	NA	NA	NA	NA	NA	NA	NA	NA	NA	NA	NA	NA	NA	NA	NA	NA	NA	NA	NA	NA	NA	NA	NA
P34914	Bifunctional epoxide hydrolase 2;Cytosolic epoxide hydrolase 2;Lipid-phosphate phosphatase	Ephx2	2	641524	617507	325894	427232	299513	415732	513831	576028	587669	501620	456769	530222	387778	324417	343632	397664	NA	NA	NA	NA	NA	NA	NA	NA	NA	NA	NA	NA	NA	NA	NA	NA	NA	NA	NA	NA	NA	NA	NA	NA	NA	NA	NA	NA	NA	NA
Q91X83	S-adenosylmethionine synthase isoform type-1	Mat1a	2	641524	617507	325894	427232	299513	415732	513831	576028	587669	501620	456769	530222	387778	324417	343632	397664	NA	NA	NA	NA	NA	NA	NA	NA	NA	NA	NA	NA	NA	NA	NA	NA	NA	NA	NA	NA	NA	NA	NA	NA	NA	NA	NA	NA	NA	NA
Q9CQ52	Chymotrypsin-like elastase family member 3B	Cela3b	2	641524	617507	325894	427232	299513	415732	513831	576028	587669	501620	456769	530222	387778	324417	343632	397664	NA	NA	NA	NA	NA	NA	NA	NA	NA	NA	NA	NA	NA	NA	NA	NA	NA	NA	NA	NA	NA	NA	NA	NA	NA	NA	NA	NA	NA	NA
A0A075B5J9	Immunoglobulin kappa variable 17-127	Igkv17-127	2	15575000	617507	325894	427232	299513	415732	513831	576028	48553000	9178100	456769	530222	387778	324417	343632	397664	NA	NA	NA	NA	NA	NA	NA	NA	NA	NA	NA	NA	NA	NA	NA	NA	NA	NA	NA	NA	NA	NA	NA	NA	NA	NA	NA	NA	NA	NA
Q8K426	Resistin-like gamma	Retnlg	2	1117800	13533000	1735000	427232	299513	415732	513831	576028	1471200	501620	456769	530222	387778	324417	343632	2382900	NA	NA	NA	NA	NA	NA	NA	NA	NA	NA	NA	NA	NA	NA	NA	NA	NA	NA	NA	NA	NA	NA	NA	NA	NA	NA	NA	NA	NA	NA
A0A075B5R0	Immunoglobulin heavy variable 5-16	Ighv5-16	2	20967000	617507	4156000	427232	299513	415732	513831	576028	587669	501620	456769	530222	387778	324417	343632	397664	NA	NA	NA	NA	NA	NA	NA	NA	NA	NA	NA	NA	NA	NA	NA	NA	NA	NA	NA	NA	NA	NA	NA	NA	NA	NA	NA	NA	NA	NA
Q62165	Dystroglycan;Alpha-dystroglycan;Beta-dystroglycan	Dag1	2	641524	3923300	325894	2588300	299513	415732	513831	576028	3236000	501620	3830100	530222	387778	3973600	3861300	4490700	NA	NA	NA	NA	NA	NA	NA	NA	NA	NA	NA	NA	NA	NA	NA	NA	NA	NA	NA	NA	NA	NA	NA	NA	NA	NA	NA	NA	NA	NA
A0A0A6YYE7	Immunoglobulin kappa variable 4-57 (Fragment)	Igkv4-57	2	10498000	617507	325894	4641000	299513	415732	513831	576028	587669	501620	456769	530222	387778	324417	343632	397664	NA	NA	NA	NA	NA	NA	NA	NA	NA	NA	NA	NA	NA	NA	NA	NA	NA	NA	NA	NA	NA	NA	NA	NA	NA	NA	NA	NA	NA	NA
A0A075B5T2	Immunoglobulinheavy chain V-III region T957;Immunoglobulinheavy chain V-III region ABE-47N;Immunoglobulinheavy chain V-III region E109;Immunoglobulinheavy chain V-III region U61;Immunoglobulinheavy chain V-III region A4;Immunoglobulinheavy chain V-III region W3082;Immunoglobulinheavy chain V-III region J606	Ighv6-3	2	11023000	617507	5764100	8087900	299513	415732	513831	576028	587669	501620	456769	530222	387778	324417	343632	397664	NA	NA	NA	NA	NA	NA	NA	NA	NA	NA	NA	NA	NA	NA	NA	NA	NA	NA	NA	NA	NA	NA	NA	NA	NA	NA	NA	NA	NA	NA
Q9D3H2	Odorant-binding protein 1a	Obp1a	2	641524	3516500	3652000	9353800	299513	415732	513831	576028	587669	501620	4191100	530222	387778	324417	343632	3133200	NA	NA	NA	NA	NA	NA	NA	NA	NA	NA	NA	NA	NA	NA	NA	NA	NA	NA	NA	NA	NA	NA	NA	NA	NA	NA	NA	NA	NA	NA
G3UZP7	H-2 class I histocompatibility antigen, D-B alpha chain	H2-D1	2	641524	58645000	75496000	34519000	299513	415732	513831	576028	587669	501620	456769	530222	387778	324417	343632	397664	NA	NA	NA	NA	NA	NA	NA	NA	NA	NA	NA	NA	NA	NA	NA	NA	NA	NA	NA	NA	NA	NA	NA	NA	NA	NA	NA	NA	NA	NA
A0A494BA59	Inactive pancreatic lipase-related protein 1	Pnliprp1	2	1561800	1598500	325894	427232	4241300	415732	513831	576028	587669	501620	456769	530222	387778	2486200	343632	397664	NA	NA	NA	NA	NA	NA	NA	NA	NA	NA	NA	NA	NA	NA	NA	NA	NA	NA	NA	NA	NA	NA	NA	NA	NA	NA	NA	NA	NA	NA
Q8C6G3	Ribonuclease pancreatic	Rnase1	2	641524	617507	325894	427232	6587000	415732	513831	576028	458460	501620	456769	530222	387778	324417	343632	397664	NA	NA	NA	NA	NA	NA	NA	NA	NA	NA	NA	NA	NA	NA	NA	NA	NA	NA	NA	NA	NA	NA	NA	NA	NA	NA	NA	NA	NA	NA
Q9ER05	Chymopasin	Ctrl	2	390340	617507	324220	427232	8208000	415732	513831	576028	587669	501620	455370	530222	387778	324417	343632	397664	NA	NA	NA	NA	NA	NA	NA	NA	NA	NA	NA	NA	NA	NA	NA	NA	NA	NA	NA	NA	NA	NA	NA	NA	NA	NA	NA	NA	NA	NA
P18528	Immunoglobulinheavy chain V region 6.96	HVM57	2	10834000	617507	4385200	427232	56274000	415732	513831	576028	587669	501620	456769	530222	387778	324417	343632	397664	NA	NA	NA	NA	NA	NA	NA	NA	NA	NA	NA	NA	NA	NA	NA	NA	NA	NA	NA	NA	NA	NA	NA	NA	NA	NA	NA	NA	NA	NA
P10493	Nidogen-1	Nid1	2	2518500	1593200	325894	427232	299513	1661400	513831	576028	587669	501620	456769	530222	387778	324417	1342600	397664	NA	NA	NA	NA	NA	NA	NA	NA	NA	NA	NA	NA	NA	NA	NA	NA	NA	NA	NA	NA	NA	NA	NA	NA	NA	NA	NA	NA	NA	NA
A0A140T8M2	Immunoglobulinkappa chain V-V region MOPC 149	Igkv12-44	2	4432500	1022600	325894	427232	10123000	2273500	513831	576028	587669	501620	456769	530222	387778	324417	343632	397664	NA	NA	NA	NA	NA	NA	NA	NA	NA	NA	NA	NA	NA	NA	NA	NA	NA	NA	NA	NA	NA	NA	NA	NA	NA	NA	NA	NA	NA	NA
P49183	Deoxyribonuclease-1	Dnase1	2	4553700	2419500	325894	427232	299513	3822500	513831	576028	587669	3116400	2557000	1965300	387778	324417	343632	2120300	NA	NA	NA	NA	NA	NA	NA	NA	NA	NA	NA	NA	NA	NA	NA	NA	NA	NA	NA	NA	NA	NA	NA	NA	NA	NA	NA	NA	NA	NA
P09055	Integrin beta-1	Itgb1	2	3902200	617507	3889500	1724300	299513	5656000	513831	576028	587669	501620	456769	530222	2744100	324417	343632	4484600	NA	NA	NA	NA	NA	NA	NA	NA	NA	NA	NA	NA	NA	NA	NA	NA	NA	NA	NA	NA	NA	NA	NA	NA	NA	NA	NA	NA	NA	NA
A0A075B5W2	Immunoglobulin heavy variable 1-52	Ighv1-52	2	39297000	4073800	8896100	427232	299513	9130000	513831	576028	587669	501620	456769	530222	387778	324417	343632	397664	NA	NA	NA	NA	NA	NA	NA	NA	NA	NA	NA	NA	NA	NA	NA	NA	NA	NA	NA	NA	NA	NA	NA	NA	NA	NA	NA	NA	NA	NA
A0A075B6D5	Immunoglobulin kappa chain variable 19-93	Igkv19-93	2	6601000	617507	325894	6567100	10912000	11061000	513831	576028	587669	501620	456769	530222	387778	324417	343632	397664	NA	NA	NA	NA	NA	NA	NA	NA	NA	NA	NA	NA	NA	NA	NA	NA	NA	NA	NA	NA	NA	NA	NA	NA	NA	NA	NA	NA	NA	NA
A0A140T8N0	Immunoglobulinkappa chain V-V region MOPC 41	Gm5571	2	4850900	617507	325894	2989800	299513	55331000	513831	576028	587669	501620	3145700	530222	387778	324417	343632	397664	NA	NA	NA	NA	NA	NA	NA	NA	NA	NA	NA	NA	NA	NA	NA	NA	NA	NA	NA	NA	NA	NA	NA	NA	NA	NA	NA	NA	NA	NA
E9PYA3	Hydroxyacylglutathione hydrolase, mitochondrial	Hagh	2	641524	617507	325894	1747500	1815700	415732	2405100	576028	587669	501620	1551300	3655800	1593600	324417	343632	2434900	NA	NA	NA	NA	NA	NA	NA	NA	NA	NA	NA	NA	NA	NA	NA	NA	NA	NA	NA	NA	NA	NA	NA	NA	NA	NA	NA	NA	NA	NA
P52480	Pyruvate kinase PKM	Pkm	2	641524	617507	5685000	427232	2629900	6891100	5116600	576028	587669	501620	4275900	4439300	3421700	324417	343632	3544200	NA	NA	NA	NA	NA	NA	NA	NA	NA	NA	NA	NA	NA	NA	NA	NA	NA	NA	NA	NA	NA	NA	NA	NA	NA	NA	NA	NA	NA	NA
P06797	Cathepsin L1;Cathepsin L1 heavy chain;Cathepsin L1 light chain	Ctsl	2	641524	4793500	325894	4428700	4009900	415732	5255500	576028	587669	501620	456769	530222	4751600	324417	2340900	3793900	NA	NA	NA	NA	NA	NA	NA	NA	NA	NA	NA	NA	NA	NA	NA	NA	NA	NA	NA	NA	NA	NA	NA	NA	NA	NA	NA	NA	NA	NA
Q9Z121	C-C motif chemokine 8	Ccl8	2	2686700	2374600	325894	427232	5868400	3039100	513831	1914300	587669	501620	456769	530222	387778	324417	343632	397664	NA	NA	NA	NA	NA	NA	NA	NA	NA	NA	NA	NA	NA	NA	NA	NA	NA	NA	NA	NA	NA	NA	NA	NA	NA	NA	NA	NA	NA	NA
A0A1L1SSC4	Apolipoprotein A-V	Apoa5	2	1078400	1658500	325894	1834700	299513	415732	2500200	2131700	587669	1217800	456769	530222	1231800	324417	343632	397664	NA	NA	NA	NA	NA	NA	NA	NA	NA	NA	NA	NA	NA	NA	NA	NA	NA	NA	NA	NA	NA	NA	NA	NA	NA	NA	NA	NA	NA	NA
A0A494BBJ8	Fermitin family homolog 3	Fermt3	2	641524	617507	5030900	2123600	299513	415732	4979100	2774200	587669	501620	6468800	530222	387778	324417	343632	397664	NA	NA	NA	NA	NA	NA	NA	NA	NA	NA	NA	NA	NA	NA	NA	NA	NA	NA	NA	NA	NA	NA	NA	NA	NA	NA	NA	NA	NA	NA
P09036	Serine protease inhibitor Kazal-type 3	Spink3	2	3402300	617507	325894	427232	299513	2968800	3964600	3138100	2803500	501620	3050700	530222	4182200	324417	343632	397664	NA	NA	NA	NA	NA	NA	NA	NA	NA	NA	NA	NA	NA	NA	NA	NA	NA	NA	NA	NA	NA	NA	NA	NA	NA	NA	NA	NA	NA	NA
P25785	Metalloproteinase inhibitor 2	Timp2	2	8594900	7362200	325894	427232	299513	8776700	513831	6680500	8126900	501620	11039000	530222	387778	324417	9101900	6669700	NA	NA	NA	NA	NA	NA	NA	NA	NA	NA	NA	NA	NA	NA	NA	NA	NA	NA	NA	NA	NA	NA	NA	NA	NA	NA	NA	NA	NA	NA
[truncated: 6 more columns]

## Sheet: Significant different proteins
																				FWrn 10 m / FWT 10 m						FWrn 4m / FWT 4 m						FWT 4 m / FWT 10 m						FWrn 4 m / FWrn 10 m						FWrn 4 m / FWT 10 m
Accession	ProteinNames	GeneNames	RazorUniquePeptides	FWrn10m_2868	FWrn10m_2869	FWrn10m_2870	FWrn10m_2871	FWrn4m_3065	FWrn4m_3066	FWrn4m_3082	FWrn4m_3083	FWT10m_2854	FWT10m_2856	FWT10m_2882	FWT10m_2883	FWT4m_3002	FWT4m_3003	FWT4m_3021	FWT4m_3022	mean_g1 FWrn10m_FWT10m	mean_g2 FWrn10m_FWT10m	Ratio_g1_g2 FWrn10m_FWT10m	log2Ratio FWrn10m_FWT10m	zscore FWrn10m_FWT10m	pval_Limma FWrn10m_FWT10m	mean_g1 FWrn4m_FWT4m	mean_g2 FWrn4m_FWT4m	Ratio_g1_g2 FWrn4m_FWT4m	log2Ratio FWrn4m_FWT4m	zscore FWrn4m_FWT4m	pval_Limma FWrn4m_FWT4m	mean_g1 FWT4m_FWT10m	mean_g2 FWT4m_FWT10m	Ratio_g1_g2 FWT4m_FWT10m	log2Ratio FWT4m_FWT10m	zscore FWT4m_FWT10m	pval_Limma FWT4m_FWT10m	mean_g1 FWrn4m_FWrn10m	mean_g2 FWrn4m_FWrn10m	Ratio_g1_g2 FWrn4m_FWrn10m	log2Ratio FWrn4m_FWrn10m	zscore FWrn4m_FWrn10m	pval_Limma FWrn4m_FWrn10m	mean_g1 FWrn4m_FWT10m	mean_g2 FWrn4m_FWT10m	Ratio_g1_g2 FWrn4m_FWT10m	log2Ratio FWrn4m_FWT10m	zscore FWrn4m_FWT10m	pval_Limma FWrn4m_FWT10m
P07724	Serum albumin	Alb	29	15071000	4731300	15395000	8491400	6466100	3721600	3441100	1869700	11212000	5607800	595850000	15044000	11824000	32265000	8751000	20733000	10922175	156928450	0.0695997	-3.84477	-5.97855	0.318563	3874625	18393250	0.210655	-2.24705	-3.46361	0.00202129	18393250	156928450	0.117208	-3.09286	-3.08772	0.600585	3874625	10922175	0.354748	-1.49513	-1.70695	0.0154671	3874625	156928450	0.0246904	-5.33991	-7.96855	0.0612409
Q80YQ1	Thrombospondin-1	Thbs1	33	21801000	6459000	54304000	30780000	41955000	43974000	13537000	10509000	20039000	897570	391560000	186900000	59324000	69043000	40124000	68209000	28336000	1.49849e+08	0.189097	-2.4028	-3.8484	0.744418	27493750	59175000	0.464618	-1.10588	-1.75621	0.0272144	59175000	1.49849e+08	0.394897	-1.34045	-1.31631	0.670289	27493750	28336000	0.970276	-0.0435324	0.218283	0.958599	27493750	1.49849e+08	0.183476	-2.44634	-3.69952	0.752281
Q01853	Transitional endoplasmic reticulum ATPase	Vcp	7	2628100	1584600	1444300	3313900	3073000	6056800	7874400	3384000	629160	1391400	15182000	19375000	1808100	1764500	2293700	4970100	2242725	9144390	0.245257	-2.02763	-3.29418	0.437818	5097050	2709100	1.88146	0.911849	1.26271	0.0591965	2709100	9144390	0.296258	-1.75507	-1.73543	0.552563	5097050	2242725	2.2727	1.18441	1.84689	0.0186516	5097050	9144390	0.557396	-0.843224	-1.33437	0.837996
E9QPU1	von Willebrand factor;von Willebrand antigen 2	Vwf	28	7412000	2887200	8054800	3913300	7169100	5850100	2131900	2319600	3795700	27397000	41323000	15850000	8369700	6549700	5157800	8350100	5566825	22091425	0.25199	-1.98856	-3.23646	0.0574814	4367675	7106825	0.614575	-0.70234	-1.15243	0.0753671	7106825	22091425	0.321701	-1.63621	-1.61527	0.117339	4367675	5566825	0.78459	-0.349989	-0.188166	0.428013	4367675	22091425	0.197709	-2.33855	-3.5405	0.0270835
Q9QZU3	Platelet glycoprotein V	Gp5	11	13282000	5461800	23025000	14549000	23294000	23432000	7208900	4730800	6601600	775990	132650000	56269000	20646000	35338000	18200000	38638000	14079450	4.90741e+07	0.286902	-1.80137	-2.95994	0.91726	14666425	28205500	0.519985	-0.943459	-1.51319	0.0691875	28205500	4.90741e+07	0.574753	-0.798987	-0.76897	0.547217	14666425	14079450	1.04169	0.0589263	0.354173	0.884403	14666425	4.90741e+07	0.298863	-1.74245	-2.66104	0.870223
Q91Y47	Coagulation factor XI;Coagulation factor XIa heavy chain;Coagulation factor XIa light chain	F11	4	2235100	617507	325894	1818600	2881700	5211800	2574300	4153700	2494800	1999800	4062500	2567600	2480600	4735800	3565600	10158000	1.24928e+06	2781175	0.44919	-1.1546	-2.0045	0.0437746	3705375	5235000	0.707808	-0.49857	-0.84755	0.447391	5235000	2781175	1.8823	0.912495	0.961076	0.12454	3705375	1.24928e+06	2.96602	1.56853	2.35634	0.0139113	3705375	2781175	1.33231	0.413925	0.520358	0.221652
P20065-2	Thymosin beta-4	Tmsb4x	2	21182000	19115000	18375000	13102000	8743300	6040400	10505000	7611100	8001600	2820700	9588900	3076400	8617900	1281400	3438600	11140000	17943500	5871900	3.05583	1.61156	2.0818	0.0038954	8224950	6119475	1.34406	0.426599	0.53668	0.22829	6119475	5871900	1.04216	0.0595805	0.0989098	0.833366	8224950	17943500	0.45838	-1.12538	-1.21656	0.00122707	8224950	5871900	1.40073	0.48618	0.626958	0.171981
P01592	Immunoglobulin J chain	Igj	4	91959000	16765000	29809000	29706000	22278000	29769000	17091000	3884300	14070000	13355000	14904000	6245100	4683200	7327700	5998600	11342000	42059750	12143525	3.46355	1.79225	2.34873	0.0200122	18255575	7337875	2.48786	1.3149	1.86575	0.124941	7337875	12143525	0.604262	-0.726753	-0.695953	0.0870653	18255575	42059750	0.434039	-1.2041	-1.32097	0.124625	18255575	12143525	1.50332	0.58815	0.7774	0.615577
A0A075B5P6	Immunoglobulinmu chain C region	Ighm	18	1523900000	200090000	339810000	531050000	258530000	448080000	74993000	46441000	167070000	219980000	224770000	106890000	31305000	49104000	37005000	113480000	648712500	179677500	3.61043	1.85217	2.43724	0.040014	207011000	57723500	3.58625	1.84248	2.6551	0.082137	57723500	179677500	0.321262	-1.63818	-1.61726	0.00405922	207011000	648712500	0.319111	-1.64787	-1.90953	0.0699682	207011000	179677500	1.15213	0.204298	0.211085	0.700483
P04117	Fatty acid-binding protein, adipocyte	Fabp4	7	32451000	21692000	13726000	9369900	299513	415732	513831	576028	587669	501620	11245000	7583700	3701200	9184800	343632	4850100	19309725	4.9795e+06	3.87785	1.95526	2.58952	0.0298692	NA	NA	NA	NA	NA	NA	NA	NA	NA	NA	NA	NA	451276	19309725	0.0233704	-5.41917	-6.91136	8.05622e-07	NA	NA	NA	NA	NA	NA
P01654	Immunoglobulinkappa chain V-III region PC 2880/PC 1229;Immunoglobulinkappa chain V-III region MOPC 70;Immunoglobulinkappa chain V-III region PC 7132;Immunoglobulinkappa chain V-III region 50S10.1	Igkv3-2	4	150190000	17098000	105980000	42142000	299513	11749000	513831	576028	587669	20492000	47938000	11263000	387778	324417	343632	10886000	78852500	2.00702e+07	3.92884	1.9741	2.61736	0.086923	NA	NA	NA	NA	NA	NA	NA	NA	NA	NA	NA	NA	3.28459e+06	78852500	0.0416549	-4.58537	-5.8055	0.00113002	NA	NA	NA	NA	NA	NA
P01837	Immunoglobulinkappa chain C region	Igkc	5	55146000	4330100	3688900	19952000	4405100	6494100	513831	576028	4232000	5690900	7048600	1289300	387778	1366600	1510000	1594600	20779250	4565200	4.55166	2.18639	2.93097	0.140439	NA	NA	NA	NA	NA	NA	1.21474e+06	4565200	0.266088	-1.91003	-1.89206	0.0228571	2.99726e+06	20779250	0.144243	-2.79343	-3.42886	0.0430613	2.99726e+06	4565200	0.656546	-0.607032	-0.985908	0.260756
A0A075B5R5	Immunoglobulinheavy chain V region 441;Immunoglobulinheavy chain V region MOPC 173;Immunoglobulinheavy chain V region J539;Immunoglobulinheavy chain V region T601;Immunoglobulinheavy chain V region X44	Ighv4-1	2	26044000	4889800	8314400	4748100	299513	9487900	513831	576028	587669	501620	2974800	4388400	387778	324417	343632	3008100	10999075	2.11312e+06	5.20513	2.37993	3.21687	0.0192998	NA	NA	NA	NA	NA	NA	NA	NA	NA	NA	NA	NA	2.71932e+06	10999075	0.247232	-2.01607	-2.39786	0.0197849	NA	NA	NA	NA	NA	NA
A0A0A6YXN4	Immunoglobulin heavy variable V1-18 (Fragment)	Ighv1-18	3	35180000	1570000	1690400	2197700	1191000	1615400	513831	576028	587669	1423400	456769	530222	387778	324417	343632	397664	10159525	749515	13.5548	3.76073	5.25665	0.0403379	NA	NA	NA	NA	NA	NA	NA	NA	NA	NA	NA	NA	974065	10159525	0.095877	-3.38267	-4.21037	0.0640462	NA	NA	NA	NA	NA	NA
Q9EQ08	Heparan N-sulfatase	Sgsh	5	9182100	5950700	325894	7805400	2047700	415732	1795300	576028	1694900	4617200	3129500	5755200	4449400	4928400	4527200	6375600	5.81602e+06	3799200	1.53085	0.614337	0.608656	0.996358	1.20869e+06	5070150	0.238393	-2.06858	-3.19659	0.00178906	5070150	3799200	1.33453	0.416333	0.459532	0.18738	NA	NA	NA	NA	NA	NA	1.20869e+06	3799200	0.318143	-1.65225	-2.52797	0.0183106
Q07235	Glia-derived nexin	Serpine2	3	641524	617507	1333100	427232	299513	415732	513831	576028	587669	501620	5291800	3248600	1517900	2713600	1251600	1393800	NA	NA	NA	NA	NA	NA	451276	1719225	0.262488	-1.92968	-2.98876	0.000235026	1719225	2.40742e+06	0.714135	-0.485731	-0.452316	0.878514	NA	NA	NA	NA	NA	NA	NA	NA	NA	NA	NA	NA
P13609	Serglycin	Srgn	2	641524	617507	5572200	427232	299513	5403200	513831	576028	587669	501620	23006000	14734000	3939400	5530100	4924600	6704100	NA	NA	NA	NA	NA	NA	1.69814e+06	5274550	0.32195	-1.63509	-2.548	0.0114755	5274550	9.70732e+06	0.543358	-0.880025	-0.850888	0.602467	NA	NA	NA	NA	NA	NA	NA	NA	NA	NA	NA	NA
P68373	Tubulin alpha-1C chain	Tuba1c	5	4531500	4800500	7472400	4203200	4088300	9473700	6022500	5671900	2383200	2625900	5699400	4316500	387778	2733200	2336000	4066800	5251900	3756250	1.39818	0.483546	0.415445	0.145926	6314100	2.38094e+06	2.65193	1.40704	2.00361	0.0338786	2.38094e+06	3756250	0.633862	-0.657759	-0.626211	0.211405	6314100	5251900	1.20225	0.265738	0.628464	0.446633	6314100	3756250	1.68096	0.749284	1.01513	0.0650169
E9Q704	Peptidyl-glycine alpha-amidating monooxygenase;Peptidylglycine alpha-hydroxylating monooxygenase;Peptidyl-alpha-hydroxyglycine alpha-amidating lyase	Pam	2	4452000	3482300	2982400	2412700	2744600	3504100	2726200	3411600	2400400	2990400	2863200	2632000	387778	324417	1012700	2880600	3332350	2721500	1.22445	0.292138	0.132688	0.253344	3096625	1.15137e+06	2.6895	1.42734	2.03398	0.0143842	1.15137e+06	2721500	0.423066	-1.24105	-1.21582	0.0254209	3096625	3332350	0.929262	-0.105843	0.135641	0.731262	3096625	2721500	1.13784	0.186295	0.184524	0.312347
A0A075B5M7	Immunoglobulin kappa variable 5-39	Igkv5-39	3	41739000	3573700	9512300	84578000	18715000	2972800	6063500	1028200	21743000	17123000	12089000	530222	387778	324417	343632	2934400	34850750	1.28713e+07	2.70763	1.43703	1.82398	0.355771	7194875	997557	7.2125	2.8505	4.1633	0.0217503	NA	NA	NA	NA	NA	NA	7194875	34850750	0.206448	-2.27615	-2.74281	0.107461	7194875	1.28713e+07	0.558986	-0.839117	-1.32831	0.617019
E9PV24	Fibrinogen alpha chain;Fibrinopeptide A;Fibrinogen alpha chain	Fga	36	544040000	3512900000	15679000	486940000	5207600	10002000	409080000	1555600000	1936400000	3933500000	11696000	6816500	38741000	15437000	62660000	8740200	1139889750	1472103125	0.774327	-0.368984	-0.843952	0.667482	494972400	31394550	15.7662	3.97876	5.8514	0.384175	31394550	1472103125	0.0213263	-5.55122	-5.57275	0.252108	494972400	1139889750	0.434228	-1.20347	-1.32013	0.350008	494972400	1472103125	0.336235	-1.57246	-2.41025	0.710369
Q921I1	Serotransferrin	Tf	11	2407.2	617507	1788.5	427232	3060.8	1251.6	513831	576028	587669	501620	17598000	1721.5	2284.4	1951.7	1579	1730	NA	NA	NA	NA	NA	NA	273543	1886.28	145.017	7.18008	10.6412	0.0755758	1886.28	4.67225e+06	0.000403719	-11.2744	-11.358	0.0171724	NA	NA	NA	NA	NA	NA	NA	NA	NA	NA	NA	NA
Q9QXF8	Glycine N-methyltransferase	Gnmt	7	18945000	4431400	7268600	2714900	1987700	2074200	513831	576028	587669	3082000	1991000	23678000	933780	1720700	883090	2716700	8339975	7.33467e+06	1.13706	0.185312	-0.0251207	0.368789	1.28794e+06	1.56357e+06	0.823719	-0.279776	-0.520193	0.501305	1.56357e+06	7.33467e+06	0.213175	-2.22989	-2.21539	0.315424	1.28794e+06	8339975	0.15443	-2.69498	-3.29829	0.00600392	NA	NA	NA	NA	NA	NA
A0A0U1RPF4	Hepcidin-2	Hamp2	2	4566500	3613200	9160400	3782000	299513	2256700	3643700	576028	3898100	4889200	2717300	2911300	2492400	324417	343632	397664	5280525	3603975	1.46519	0.551092	0.515227	0.20275	NA	NA	NA	NA	NA	NA	889529	3603975	0.246819	-2.01848	-2.00169	0.00442299	1.69399e+06	5280525	0.320799	-1.64026	-1.89944	0.0232406	1.69399e+06	3603975	0.470032	-1.08917	-1.69723	0.0580869
Q00898	Alpha-1-antitrypsin 1-5	Serpina1e	10	397790000	28108000	49957000	52070000	622580000	4361900000	118870000	330500000	69117000	31100000	95605000	82678000	209880000	94559000	863950000	6185200000	131981250	69625000	1.8956	0.922656	1.06412	0.818141	1358462500	1838397250	0.738938	-0.436474	-0.754642	0.998869	1838397250	69625000	26.4043	4.7227	4.81261	0.0326136	1358462500	131981250	10.2928	3.36357	4.73708	0.036562	1358462500	69625000	19.5111	4.28623	6.23335	0.0143154
A0A075B5K0	Immunoglobulin kappa variable 14-126 (Fragment)	Igkv14-126	3	17603000	3290800	4202800	4144100	299513	415732	513831	576028	1574500	3276700	6962800	530222	387778	324417	343632	397664	7310175	3.08606e+06	2.36878	1.24414	1.53903	0.13681	NA	NA	NA	NA	NA	NA	NA	NA	NA	NA	NA	NA	451276	7310175	0.0617326	-4.01782	-5.05277	9.57487e-05	NA	NA	NA	NA	NA	NA
P32848	Parvalbumin alpha	Pvalb	4	10364000	3944700	2629500	11132000	2525400	415732	513831	576028	587669	501620	21442000	11038000	387778	324417	343632	397664	7017550	8.39232e+06	0.836187	-0.258103	-0.680152	0.463928	NA	NA	NA	NA	NA	NA	NA	NA	NA	NA	NA	NA	1.00775e+06	7017550	0.143604	-2.79983	-3.43736	0.00234627	NA	NA	NA	NA	NA	NA
O35490	Betaine--homocysteine S-methyltransferase 1	Bhmt	6	5375300	9328100	8654000	3488600	2268700	415732	513831	1507000	1896200	6447000	456769	45265000	387778	2202200	343632	3064000	6711500	1.35162e+07	0.496551	-1.00999	-1.79087	0.628452	NA	NA	NA	NA	NA	NA	NA	NA	NA	NA	NA	NA	1.17632e+06	6711500	0.175269	-2.51236	-3.05609	0.00160185	NA	NA	NA	NA	NA	NA
Q91YI0	Argininosuccinate lyase	Asl	8	19502000	4009800	13622000	3211100	2301900	2718400	1610100	1768000	1491500	3294300	2491800	8725100	1113800	1746800	1848000	3346500	10086225	4000675	2.52113	1.33407	1.67188	0.134955	2099600	2013775	1.04262	0.060212	-0.0115052	0.68906	2013775	4000675	0.503359	-0.990341	-0.9624	0.201265	2099600	10086225	0.208165	-2.2642	-2.72696	0.0114485	2099600	4000675	0.524811	-0.930129	-1.46259	0.23815
Q62087	Serum paraoxonase/lactonase 3	Pon3	3	4606800	7218600	5402800	5414500	3434200	415732	513831	576028	3912300	6712500	5071200	3562000	4872400	5492500	343632	397664	5660675	4814500	1.17576	0.233588	0.0461956	0.325929	NA	NA	NA	NA	NA	NA	2.77655e+06	4814500	0.576706	-0.794093	-0.764023	0.116367	1.23495e+06	5660675	0.218163	-2.19652	-2.6372	0.00201385	1.23495e+06	4814500	0.256506	-1.96294	-2.98634	0.00465084
G3XA25	Acetyl-CoA acetyltransferase, cytosolic	Acat2	3	3057400	1182100	1045900	322880	294250	826200	285280	207040	238360	433840	603580	2058500	310960	183320	211000	336660	1402070	833570	1.68201	0.750183	0.809333	0.359646	403192	260485	1.54785	0.630269	0.841409	0.322355	260485	833570	0.312493	-1.6781	-1.65762	0.0794954	403192	1402070	0.287569	-1.79802	-2.10867	0.0485332	403192	833570	0.483694	-1.04783	-1.63625	0.289066
Q64339	Ubiquitin-like protein ISG15	Isg15	2	3059600	617507	325894	3659400	2823500	5818400	6853600	3187000	587669	501620	7120500	6649900	4714200	324417	343632	7142700	NA	NA	NA	NA	NA	NA	4670625	3.13124e+06	1.49162	0.576883	0.761533	0.161211	NA	NA	NA	NA	NA	NA	4670625	1.9156e+06	2.4382	1.28582	1.98139	0.0496065	4670625	3.71492e+06	1.25726	0.330284	0.396958	0.261779
G5E843	Roundabout homolog 1	Robo1	4	171370000	117400000	118780000	234800000	13916000	11000000	128460000	131270000	128070000	113380000	279800000	290240000	134410000	25390000	155510000	233700000	160587500	202872500	0.791569	-0.337214	-0.797018	0.522745	71161500	137252500	0.518471	-0.947664	-1.51948	0.217047	137252500	202872500	0.676546	-0.563741	-0.531173	0.285105	71161500	160587500	0.443132	-1.17419	-1.28129	0.0564808	71161500	202872500	0.35077	-1.5114	-2.32017	0.0430414
Q19LI2	Alpha-1B-glycoprotein	A1bg	31	13551000000	4766500000	4960700000	5876100000	1067900000	5137600000	935790000	1992500000	5302400000	11831000000	645070000	4371500000	1495000000	1651300000	347890000	7687800000	7288575000	5537492500	1.31622	0.396404	0.286714	0.348211	2283447500	2795497500	0.81683	-0.291891	-0.538319	0.868807	2795497500	5537492500	0.504831	-0.986128	-0.958141	0.324831	2283447500	7288575000	0.313291	-1.67442	-1.94475	0.0116576	2283447500	5537492500	0.412361	-1.27802	-1.97585	0.297945
O88844	Isocitrate dehydrogenase [NADP] cytoplasmic	Idh1	3	3557600	2664400	3808000	2584100	2318400	3225200	513831	576028	587669	501620	2779900	8064500	387778	324417	343632	397664	3153525	2.98342e+06	1.05702	0.0799972	-0.180696	0.301764	NA	NA	NA	NA	NA	NA	NA	NA	NA	NA	NA	NA	1.65836e+06	3153525	0.525877	-0.927204	-0.953719	0.0569523	NA	NA	NA	NA	NA	NA
[truncated: 6 more columns]
