# Supplementary material for: Integrated liver and serum proteomics uncover sexual dimorphism and alteration of several immune response proteins in an aging Werner syndrome mouse model
Source: Aging (Albany NY). 2024 May 24;16(10):8417–45. doi: 10.18632/aging.205866 (PMC11164518; doi:10.18632/aging.205866)
Supplement: Supplementary Table 10 [file aging-16-205866-s011.xls]

## Sheet: Females
Supplementary Table 10. List of quantified serum proteins significantly different in at least one of the comparisons between the various male groups.
Females				Two-way ANOVA
	Accession	GeneNames	Cluster	Two-way ANOVA p value Age	Two-way ANOVA p value Genotype	Two-way ANOVA p value Age x Genotype		Gene Ontology
	Q91Y47	F11	Cluster -1	0.0085841	0.0498372	0.203683		Cluster -1
	Q00898	Serpina1e	Cluster -1	0.00844758	0.920933	0.922948		No significant GO term
	Q9EQ08	Sgsh	Cluster -2	0.358135	0.101816	0.102947
	E9QPU1	Vwf	Cluster -2	0.113786	0.0212953	0.427924		Cluster -2
	Q07235	Serpine2	Cluster -2	0.600102	0.00950013	0.444101		Term	Bonferroni p-value	Proteins
	Q9QZU3	Gp5	Cluster -2	0.65621	0.473117	0.585633		GO:0030168~platelet activation	0.0071033	Vwf, Serpine2, Gp5
	P13609	Srgn	Cluster -2	0.81342	0.0458269	0.630864		GO:0007596~blood coagulation	0.0290562	Vwf, Serpine2, Gp5
	P07724	Alb	Cluster -2	0.203227	0.046865	0.671202
	Q80YQ1	Thbs1	Cluster -2	0.713001	0.376643	0.739002
	E9Q704	Pam	Cluster -3	0.0289674	0.0119554	0.0423763
	Q921I1	Tf	Cluster -3	0.112394	0.839061	0.112559		Cluster -3
	P68373	Tuba1c	Cluster -3	0.407199	0.0212967	0.184097		No significant GO term
	Q01853	Vcp	Cluster -3	0.744197	0.990146	0.19383
	Q64339	Isg15	Cluster -3	0.476252	0.601457	0.23472
	P04117	Fabp4	Cluster -4	0.00980097	0.853251	0.00502851		Cluster -4
	Q62087	Pon3	Cluster -4	0.00505407	0.702668	0.449521		No significant GO term
	G5E843	Robo1	Cluster -4	0.053182	0.218446	0.395094
	Q91YI0	Asl	Cluster -5	0.0125531	0.153916	0.248717
	A0A075B5K0	Igkv14-126	Cluster -5	4.13e-05	0.110408	0.265725		Cluster -5
	A0A075B5R5	Ighv4-1	Cluster -5	0.0236328	0.0763569	0.277393		Term	Bonferroni p-value	Proteins
	P20065-2	Tmsb4x	Cluster -5	0.162579	0.0107971	0.289195		GO:0045087~innate immune response	0.0228075	Igj, Ighm, Igkc, Ighv4-1, Ighv1-18, Fga
	P01654	Igkv3-2	Cluster -5	0.00173395	0.222705	0.318909		GO:0042742~defense response to bacterium	0.0307162	Hamp2, Ighm, Igkc, Ighv4-1, Ighv1-18
	Q9QXF8	Gnmt	Cluster -5	0.0230953	0.655925	0.319458
	A0A0A6YXN4	Ighv1-18	Cluster -5	0.0284376	0.0090434	0.32763
	A0A075B5M7	Igkv5-39	Cluster -5	0.0151231	0.0539457	0.484503
	O88844	Idh1	Cluster -5	0.0121254	0.0412714	0.512732
	P01837	Igkc	Cluster -5	0.0105788	0.163127	0.566064
	P01592	Igj	Cluster -5	0.0543117	0.0146145	0.5915
	Q19LI2	A1bg	Cluster -5	0.0540138	0.493761	0.635232
	O35490	Bhmt	Cluster -5	0.0187945	0.751698	0.691133
	A0A0U1RPF4	Hamp2	Cluster -5	0.00141664	0.248912	0.709337
	G3XA25	Acat2	Cluster -5	0.0189039	0.25082	0.740056
	E9PV24	Fga	Cluster -5	0.196008	0.447943	0.886877
	P32848	Pvalb	Cluster -5	0.00302278	0.223369	0.991204
	A0A075B5P6	Ighm	Cluster -5	0.00703894	0.0183849	0.996731

## Sheet: Males
Males				Two-way ANOVA
	Accession	GeneNames	Cluster	Two-way ANOVA p value Age	Two-way ANOVA p value Genotype	Two-way ANOVA p value Age x Genotype		Gene Ontology
	Q00898	Serpina1e	Cluster -1	0.146204	0.00016247	0.000177169		Cluster -1
	Q01279	Egfr	Cluster -1	0.000724297	0.000909436	0.00237935		No significant GO term
	P32848	Pvalb	Cluster -1	0.0611981	0.160818	0.245542
	F6XLV1	Crocc2	Cluster -1	0.318456	0.0642676	0.960775
	E9QQ18	Prg4	Cluster -2	0.00051787	0.00618686	0.103588		Cluster -2
	P01592	Igj	Cluster -2	0.0186009	0.169547	0.481369		No significant GO term
	Q99JC1	Iglc3	Cluster -2	0.0285502	0.0954717	0.793464
	E9Q9C6	Fcgbp	Cluster -3	0.699747	0.131165	0.132614		Cluster -3
	Q9CZB2	Pmel	Cluster -3	0.196354	0.215302	0.365402		No significant GO term
	E1AZ71	Cngb1	Cluster -3	0.156582	0.00283253	0.667622
	F8WH29	Pkhd1l1	Cluster -3	0.0648341	0.00640925	0.730384
	Q9Z121	Ccl8	Cluster -3	0.180368	0.229821	0.957358
	A0A075B5M7	Igkv5-39	Cluster -3	0.00385858	0.00152059	0.105683
	Q9QX15	Clca3a1	Cluster -4	0.0221826	0.0189348	0.000151425		Cluster -4
	P07361	Orm2	Cluster -4	0.0824488	0.897833	0.0704965		No significant GO term
	Q61646	Hp	Cluster -5	0.000675836	0.717834	0.271654
	Q61704	Itih3	Cluster -5	0.00457628	0.214446	0.281998		Cluster -5
	P12246	Apcs	Cluster -5	0.00280933	0.40098	0.357023		Term	Bonferroni p-value	Proteins
	P01837	Igkc	Cluster -5	0.00186739	0.676365	0.586892		GO:0042742~defense response to bacterium	0.000162186	Ighm, Igkc, Hp, Chga, Ighv1-31
	P26339	Chga	Cluster -5	0.0257787	0.426138	0.656723		GO:0006958~complement activation, classical pathway	0.00167573	Ighm, Igkc, Ighv1-31, Apcs
	A0A075B5P6	Ighm	Cluster -5	0.000399067	0.069225	0.66921
	A0A075B5V1	Ighv1-31	Cluster -5	9.66315e-07	0.866517	0.835418
	Q02819	Nucb1	Cluster -6	0.0745967	0.00208744	0.001332		Cluster -6
	Q91WG0	Ces2c	Cluster -6	0.110114	0.404243	0.0242173		No significant GO term
	P04117	Fabp4	Cluster -6	0.207676	0.49709	0.31334
	P15327	Bpgm	Cluster -7	0.0655344	0.00178161	0.258716
	P13634	Ca1	Cluster -7	0.169173	0.00671576	0.361334		Cluster -7
	A0A0A6YW67	Gm8797	Cluster -7	0.221101	0.0170322	0.387242		Term	Bonferroni p-value	Proteins
	P11352	Gpx1	Cluster -7	0.367335	0.0474412	0.398248		GO:0042744~hydrogen peroxide catabolic process	1.65241e-10	Hba-a1, Hbbt1, Cat, Prdx2, Gpx1
	P24270	Cat	Cluster -7	0.2589	0.0055381	0.444662		GO:0015671~oxygen transport	0.00226805	Hbbt1, Bpgm
	A8DUK4	Hbbt1	Cluster -7	0.144334	0.0135191	0.474201		GO:0098869~cellular oxidant detoxification	0.0102333	Hba-a1, Hbbt1
	Q91VB8	Hba-a1	Cluster -7	0.18805	0.013507	0.48286		GO:0048821~erythrocyte development	0.0179034	Hba-a1, Bpgm
	Q61171	Prdx2	Cluster -7	0.155492	0.0142701	0.494935
	Q923D2	Blvrb	Cluster -7	0.237377	0.0165614	0.586503
	P23492	Pnp	Cluster -7	0.159898	0.0152259	0.660255
	Q9Z0K8	Vnn1	Cluster -8	0.645915	0.0065289	0.00065552
	P07724	Alb	Cluster -8	0.274248	0.113714	0.0172615		Cluster -8
	A0A1B0GR60	Ftl1	Cluster -8	0.524913	0.589042	0.109835		No significant GO term
	P11499	Hsp90ab1	Cluster -8	0.0759562	0.889354	0.264572
