# Supplementary material for: Integrated liver and serum proteomics uncover sexual dimorphism and alteration of several immune response proteins in an aging Werner syndrome mouse model
Source: Aging (Albany NY). 2024 May 24;16(10):8417–45. doi: 10.18632/aging.205866 (PMC11164518; doi:10.18632/aging.205866)
Supplement: Supplementary Table 11 [file aging-16-205866-s012.xls]

## Sheet: Column header
Supplementary Table 11. Two-way ANOVA of proteins associated with clusters and gene ontology analyses in the serum of both females and males.
Column header	Description
Accession	UniProt accession number of the leading razor protein
Protein.names	Protein name
Gene.names	Gene name
Razor...unique.peptides	Number of unique and razor peptides
MWrn10m_2970	LFQ intensities, normalized and imputed.
MWrn10m_2971
MWrn10m_2972
MWrn10m_2973
MWrn4m_3026
MWrn4m_3029
MWrn4m_3123
MWrn4m_3124
MWT10m_3048
MWT10m_3049
MWT10m_3051
MWT10m_3052
MWT4m_3000
MWT4m_3001
MWT4m_3014
MWT4m_3017
mean_g1	Mean of intensities for group g1
mean_g2	Mean of intensities for group g2
Ratio_g1g2	Ratio is computed as mean of group g1 / mean of group g2
log2Ratio	Log2 of the ratio between group g1 and group g2
Foldchange	The fold change is computed as ratio when ratio >0 or 1/ratio when ratio <0
Log2Foldchange	Log2 of the fold change between group g1 and group g2
zscore	zscore = x - µ / σ, where x = log2(ratio), µ = average of all log2(ratio) et σ = standard deviation of all log2(ratio)
pval_Limma	p-value from Limma
qval_Limma	Benjamini-Hochberg adjusted p-value from Limma
Sign_zscore_qval_Limma	A protein is considered as significantly regulated if :|zscore| > 1.96 & Limma q-value < 0.05 If 'Up', the protein is more abudant in group g1 than in group g2 If 'Down' the protein is more abundant in group g1 than in group g2
Replacement of missing values: Missing values ​are replaced with a noise value corresponding to the 1st percentile of the values ​for each column (Red colored LFQ values in the table)

## Sheet: Quantified proteins in males
																				MWrn 10m / MWT10m						MWrn 4m / MWT 4m						MWT 4m / MWT 10m						MWrn 4m / MWrn 10m						MWrn 4m / MWT 10m
Accession	ProteinNames	GeneNames	RazorUniquePeptides	MWrn10m_2970	MWrn10m_2971	MWrn10m_2972	MWrn10m_2973	MWrn4m_3026	MWrn4m_3029	MWrn4m_3123	MWrn4m_3124	MWT10m_3048	MWT10m_3049	MWT10m_3051	MWT10m_3052	MWT4m_3000	MWT4m_3001	MWT4m_3014	MWT4m_3017	mean_g1 MWrn10m_MWT10m	mean_g2 MWrn10m_MWT10m	Ratio_g1_g2 MWrn10m_MWT10m	log2Ratio MWrn10m_MWT10m	zscore MWrn10m_MWT10m	pval_Limma MWrn10m_MWT10m	mean_g1 MWrn4m_MWT4m	mean_g2 MWrn4m_MWT4m	Ratio_g1_g2 MWrn4m_MWT4m	log2Ratio MWrn4m_MWT4m	zscore MWrn4m_MWT4m	pval_Limma MWrn4m_MWT4m	mean_g1 MWT4m_MWT10m	mean_g2 MWT4m_MWT10m	Ratio_g1_g2 MWT4m_MWT10m	log2Ratio MWT4m_MWT10m	zscore MWT4m_MWT10m	pval_Limma MWT4m_MWT10m	mean_g1 MWrn4m_MWrn10m	mean_g2 MWrn4m_MWrn10m	Ratio_g1_g2 MWrn4m_MWrn10m	log2Ratio MWrn4m_MWrn10m	zscore MWrn4m_MWrn10m	pval_Limma MWrn4m_MWrn10m	mean_g1 MWrn4m_MWT10m	mean_g2 MWrn4m_MWT10m	Ratio_g1_g2 MWrn4m_MWT10m	log2Ratio MWrn4m_MWT10m	zscore MWrn4m_MWT10m	pval_Limma MWrn4m_MWT10m
E9Q414	Apolipoprotein B-100;Apolipoprotein B-48	Apob	189	293740000	243460000	190810000	369650000	252950000	198750000	208450000	164630000	243450000	268370000	235060000	132340000	183750000	264160000	197310000	163960000	274415000	219805000	1.24845	0.320135	-0.135996	0.293527	206195000	202295000	1.01928	0.0275487	-0.195579	0.864282	202295000	219805000	0.920338	-0.119764	-0.421508	0.731686	206195000	274415000	0.751398	-0.41235	-0.457415	0.135146	206195000	219805000	0.938081	-0.0922149	-0.557777	0.825435
P01027	Complement C3;Complement C3 beta chain;C3-beta-c;Complement C3 alpha chain;C3a anaphylatoxin;Acylation stimulating protein;Complement C3b alpha chain;Complement C3c alpha chain fragment 1;Complement C3dg fragment;Complement C3g fragment;Complement C3d fragment;Complement C3f fragment;Complement C3c alpha chain fragment 2	C3	108	5552100000	5611800000	4178900000	5363200000	5074600000	4796400000	3983200000	3800900000	4019700000	2987000000	3940600000	2792000000	5492100000	5515600000	4214100000	4342700000	5176500000	3434825000	1.50706	0.59174	0.224085	0.0155169	4413775000	4891125000	0.902405	-0.148153	-0.566791	0.373293	4891125000	3434825000	1.42398	0.50993	0.609766	0.0254258	4413775000	5176500000	0.852656	-0.229964	-0.156716	0.197367	4413775000	3434825000	1.28501	0.361776	0.145357	0.0921462
Q61838	Alpha-2-macroglobulin;Alpha-2-macroglobulin 165 kDa subunit;Alpha-2-macroglobulin 35 kDa subunit	A2m	94	23154000000	21226000000	17079000000	18390000000	20656000000	20892000000	17207000000	16724000000	18697000000	15752000000	19321000000	15183000000	21087000000	22263000000	19640000000	17977000000	19962250000	17238250000	1.15802	0.211661	-0.279805	0.274441	18869750000	20241750000	0.932219	-0.101259	-0.467715	0.446774	20241750000	17238250000	1.17423	0.231721	0.154132	0.166045	18869750000	19962250000	0.945272	-0.081199	0.0885508	0.629271	18869750000	17238250000	1.09464	0.130462	-0.212899	0.454983
A0A087WSN6	Fibronectin;Anastellin	Fn1	92	1035400000	1271400000	232840000	573360000	1559000000	30698000	865170000	496220000	1530400000	845020000	546380000	341670000	496800000	233920000	424860000	1144400000	778250000	815867500	0.953893	-0.0681012	-0.6507	0.856662	737772000	574995000	1.28309	0.359626	0.506014	0.764856	574995000	815867500	0.704765	-0.504785	-1.05207	0.384763	737772000	778250000	0.947988	-0.0770586	0.0953771	0.532024	737772000	815867500	0.904279	-0.14516	-0.639777	0.458443
A0A571BF69	Maltase-glucoamylase	Mgam	88	197860000	207010000	138880000	148590000	153940000	167950000	109760000	108370000	62873000	72150000	131380000	68844000	138930000	141250000	138970000	123740000	173085000	83811750	2.06516	1.04626	0.826659	0.00356535	135005000	135722500	0.994713	-0.00764707	-0.269938	0.851672	135722500	83811750	1.61937	0.695435	0.913577	0.0129918	135005000	173085000	0.779992	-0.358468	-0.36858	0.131862	135005000	83811750	1.61081	0.687788	0.650279	0.0312422
P28665	Murinoglobulin-1	Mug1	81	6713900000	6110600000	4782300000	5132600000	7241400000	6560300000	6926100000	5886500000	6309700000	3379300000	6752400000	5645100000	7226200000	7881300000	5656100000	5234400000	5684850000	5521625000	1.02956	0.0420294	-0.504694	0.768302	6653575000	6499500000	1.02371	0.033801	-0.182369	0.765884	6499500000	5521625000	1.1771	0.235236	0.159889	0.33451	6653575000	5684850000	1.1704	0.227007	0.596688	0.168209	6653575000	5521625000	1.205	0.269037	0.00172359	0.22539
P06684	Complement C5;Complement C5 beta chain;Complement C5 alpha chain;C5a anaphylatoxin;Complement C5 alpha chain	C5	79	709350000	639220000	561860000	600430000	676460000	603670000	658600000	544130000	925690000	661420000	622720000	660060000	686710000	611230000	573410000	545200000	627715000	717472500	0.874898	-0.192814	-0.816038	0.366124	620715000	604137500	1.02744	0.0390541	-0.171271	0.762282	604137500	717472500	0.842036	-0.248047	-0.631602	0.218725	620715000	627715000	0.988848	-0.0161787	0.195749	0.911334	620715000	717472500	0.865141	-0.208993	-0.738641	0.312661
P01029	Complement C4-B;Complement C4 beta chain;Complement C4 alpha chain;C4a anaphylatoxin;Complement C4 gamma chain	C4b	73	604600000	634550000	492360000	616800000	526710000	522560000	495960000	461800000	556300000	286740000	392470000	404630000	618640000	525890000	468240000	580900000	587077500	410035000	1.43177	0.517804	0.126064	0.0395508	501757500	548417500	0.914919	-0.128284	-0.524814	0.352846	548417500	410035000	1.33749	0.419528	0.461711	0.0722181	501757500	587077500	0.85467	-0.226561	-0.151106	0.140749	501757500	410035000	1.22369	0.291243	0.0361165	0.162989
E9Q8I0	Complement factor H	Cfh	63	1723900000	1820500000	1430300000	1607700000	1576300000	1377400000	1505900000	1186400000	1977900000	1371700000	1520600000	1523900000	1708100000	1601400000	1390900000	1381500000	1645600000	1598525000	1.02945	0.0418724	-0.504902	0.790045	1411500000	1520475000	0.928328	-0.107293	-0.480464	0.44602	1520475000	1598525000	0.951174	-0.0722192	-0.343643	0.711983	1411500000	1645600000	0.857742	-0.221385	-0.142572	0.169712	1411500000	1598525000	0.883002	-0.179512	-0.692982	0.359627
B8JJN0	Complement factor B;Complement factor B Ba fragment;Complement factor B Bb fragment	Cfb	59	1151800000	1229700000	864040000	933850000	936510000	872990000	816950000	752680000	970750000	557170000	800070000	705160000	943420000	922060000	749750000	808160000	1044847500	758287500	1.3779	0.462476	0.0527121	0.0632485	844782500	855847500	0.987071	-0.0187738	-0.293446	0.896687	855847500	758287500	1.12866	0.174609	0.0605977	0.351701	844782500	1044847500	0.808522	-0.306641	-0.283132	0.103414	844782500	758287500	1.11407	0.155835	-0.173602	0.397959
G3X9T8	Ceruloplasmin	Cp	55	1986600000	2114100000	1620100000	1779700000	1656300000	1713500000	1580300000	1456400000	2001500000	1288100000	1547600000	1377000000	1704900000	1649600000	1504200000	1282400000	1875125000	1553550000	1.20699	0.271418	-0.200582	0.183037	1601625000	1535275000	1.04322	0.0610393	-0.124822	0.615854	1535275000	1553550000	0.988237	-0.0170716	-0.253325	0.981243	1601625000	1875125000	0.854143	-0.22745	-0.152572	0.145463	1601625000	1553550000	1.03095	0.0439677	-0.34686	0.74057
P20918	Plasminogen;Plasmin heavy chain A;Activation peptide;Angiostatin;Plasmin heavy chain A, short form;Plasmin light chain B	Plg	55	2046600000	2019300000	1494800000	1705700000	2204800000	1875600000	1818700000	1423900000	2112500000	1396500000	1761900000	1532600000	1973900000	1874200000	1722200000	1832800000	1816600000	1700875000	1.06804	0.0949637	-0.434517	0.626298	1830750000	1850775000	0.98918	-0.0156947	-0.286941	0.839573	1850775000	1700875000	1.08813	0.121852	-0.0258036	0.437631	1830750000	1816600000	1.00779	0.011194	0.240878	0.975165	1830750000	1700875000	1.07636	0.106158	-0.250541	0.614662
O88783	Coagulation factor V;Coagulation factor V heavy chain;Coagulation factor V light chain	F5	54	49748000	57246000	36428000	38745000	46307000	35223000	35983000	28027000	45596000	34736000	34110000	26383000	32968000	27066000	30211000	32027000	45541750	35206250	1.29357	0.371358	-0.0680868	0.145284	36385000	30568000	1.1903	0.251322	0.277196	0.201747	30568000	35206250	0.868255	-0.203809	-0.559153	0.372239	36385000	45541750	0.798937	-0.323846	-0.311499	0.169043	36385000	35206250	1.03348	0.0475122	-0.34137	0.825864
E9PVD2	Inter alpha-trypsin inhibitor, heavy chain 4	Itih4	42	1657700000	1707400000	1321100000	2539700000	1078900000	1188800000	903470000	838780000	1775100000	1111000000	989760000	1056500000	1051900000	993660000	888210000	798340000	1806475000	1233090000	1.465	0.550899	0.16994	0.0726864	1002487500	933027500	1.07445	0.103593	-0.0349174	0.547167	933027500	1233090000	0.756658	-0.402287	-0.884207	0.126352	1002487500	1806475000	0.554941	-0.849593	-1.17829	0.00623614	1002487500	1233090000	0.812988	-0.298694	-0.877569	0.273057
Q9DBD0	Inhibitor of carbonic anhydrase	Ica	41	812990000	774500000	584790000	617130000	725870000	690530000	651270000	549610000	625940000	435840000	605050000	517070000	764980000	693380000	631650000	569130000	697352500	545975000	1.27726	0.353053	-0.0923546	0.111626	654320000	664785000	0.984258	-0.0228915	-0.302146	0.881113	664785000	545975000	1.21761	0.284053	0.239839	0.139693	654320000	697352500	0.938292	-0.0918917	0.0709219	0.622893	654320000	545975000	1.19844	0.261161	-0.0104736	0.177368
Q61702	Inter-alpha-trypsin inhibitor heavy chain H1	Itih1	39	846730000	832120000	595840000	651800000	532560000	527450000	453660000	416570000	646090000	540360000	531910000	454290000	616160000	606720000	469840000	431450000	731622500	543162500	1.34697	0.429716	0.00928056	0.0609784	482560000	531042500	0.908703	-0.138119	-0.545592	0.454725	531042500	543162500	0.977686	-0.0325566	-0.278685	0.841509	482560000	731622500	0.659575	-0.600391	-0.767436	0.00852675	482560000	543162500	0.888427	-0.170676	-0.679296	0.36487
E9PV24	Fibrinogen alpha chain;Fibrinopeptide A;Fibrinogen alpha chain	Fga	35	23348000	476680000	11124000	10662000	2520000000	10013000	60779000	6633300	2557100000	2165600000	8616500	8277300	18146000	14138000	99849000	2552600000	130453500	1184898450	0.110097	-3.18316	-4.78048	0.384605	649356325	671183250	0.96748	-0.0476964	-0.354552	0.776824	671183250	1184898450	0.566448	-0.819985	-1.56829	0.798738	649356325	130453500	4.97768	2.31547	4.03992	0.72552	649356325	1184898450	0.548027	-0.867681	-1.75881	0.624576
Q80YQ1	Thrombospondin-1	Thbs1	34	49655000	30270000	278310000	64409000	5791000	291300000	15398000	32065000	7950400	5740000	70992000	74049000	99414000	139200000	30228000	7441800	105661000	39682850	2.66264	1.41286	1.31268	0.130856	86138500	69070950	1.2471	0.318579	0.419293	0.73379	69070950	39682850	1.74057	0.799563	1.08411	0.452019	86138500	105661000	0.815235	-0.294713	-0.263467	0.325976	86138500	39682850	2.17067	1.11814	1.3168	0.744272
Q8VCU2	Phosphatidylinositol-glycan-specific phospholipase D	Gpld1	34	403040000	409200000	272020000	314560000	473460000	380570000	368160000	313010000	388440000	221920000	387140000	274370000	400700000	354960000	359560000	313090000	349705000	317967500	1.09981	0.137259	-0.378444	0.546629	383800000	357077500	1.07484	0.104117	-0.0338087	0.559106	357077500	317967500	1.123	0.167358	0.0487226	0.379899	383800000	349705000	1.0975	0.134216	0.443704	0.496537	383800000	317967500	1.20704	0.271475	0.00550044	0.248066
P19221	Prothrombin;Activation peptide fragment 1;Activation peptide fragment 2;Thrombin light chain;Thrombin heavy chain;Prothrombin	F2	33	1330000000	1463600000	894180000	1166500000	1146900000	922820000	941910000	779400000	985370000	762110000	996810000	686540000	1067900000	989010000	1091300000	981990000	1213570000	857707500	1.4149	0.5007	0.103388	0.0539157	947757500	1032550000	0.91788	-0.123622	-0.514963	0.355422	1032550000	857707500	1.20385	0.267654	0.212982	0.133757	947757500	1213570000	0.780966	-0.356667	-0.365611	0.11784	947757500	857707500	1.10499	0.144032	-0.191881	0.475033
P13020	Gelsolin	Gsn	33	1659000000	1636600000	1161800000	1375600000	1643400000	1609800000	1356900000	1239200000	1094800000	1010600000	1432800000	852240000	1476800000	1624900000	1451900000	1331100000	1458250000	1097610000	1.32857	0.409873	-0.0170263	0.0864412	1462325000	1471175000	0.993984	-0.00870488	-0.272173	0.91374	1471175000	1097610000	1.34034	0.422603	0.466748	0.0439945	1462325000	1458250000	1.00279	0.00402591	0.22906	0.959912	1462325000	1097610000	1.33228	0.413898	0.226083	0.0673806
Q8K0E8	Fibrinogen beta chain;Fibrinopeptide B;Fibrinogen beta chain	Fgb	33	20638000	1009000000	569554	436830	4303300000	69793	113580000	302180	4668500000	3359600000	425807	11005	37151	260650	217270000	4282100000	NA	NA	NA	NA	NA	NA	1.10431e+09	1.12492e+09	0.981684	-0.0266694	-0.310127	0.992121	1.12492e+09	2.00713e+09	0.560459	-0.835319	-1.5934	0.88759	1.10431e+09	2.57661e+08	4.28591	2.0996	3.68402	0.951128	1.10431e+09	2.00713e+09	0.550194	-0.861988	-1.74999	0.892572
A0A0R4J0I1	Serine protease inhibitor A3K	Serpina3k	32	14947000000	13055000000	10768000000	12545000000	19997000000	16539000000	19826000000	15366000000	18669000000	11815000000	17184000000	15199000000	20575000000	18980000000	18846000000	16207000000	12828750000	15716750000	0.816247	-0.292922	-0.948757	0.199039	17932000000	18652000000	0.961398	-0.0567939	-0.373773	0.66962	18652000000	15716750000	1.18676	0.247027	0.179201	0.1899	17932000000	12828750000	1.3978	0.483156	1.019	0.0162921	17932000000	15716750000	1.14095	0.190233	-0.120326	0.334242
A0A0R4J0X5	Alpha-1-antitrypsin 1-3	Serpina1c	32	26303000000	22812000000	19063000000	21640000000	26250000000	24674000000	23119000000	21348000000	21500000000	15772000000	21140000000	15573000000	26094000000	24164000000	22601000000	19659000000	22454500000	18496250000	1.214	0.279772	-0.189507	0.176069	23847750000	23129500000	1.03105	0.0441191	-0.16057	0.723697	23129500000	18496250000	1.2505	0.322501	0.302807	0.101287	23847750000	22454500000	1.06205	0.0868486	0.365609	0.548486	23847750000	18496250000	1.28933	0.36662	0.152859	0.065592
Q91X70	Complement component C6	C6	31	112260000	98389000	105540000	103600000	209580000	120720000	236380000	143560000	204940000	156290000	197200000	213030000	218380000	165620000	155240000	158610000	104947250	192865000	0.544149	-0.877927	-1.72433	0.000666992	177560000	174462500	1.01775	0.0253896	-0.20014	0.957574	174462500	192865000	0.904584	-0.144674	-0.462305	0.42799	177560000	104947250	1.6919	0.758642	1.47319	0.0140691	177560000	192865000	0.920644	-0.119285	-0.599703	0.532129
Q8BND5	Sulfhydryl oxidase 1	Qsox1	31	254340000	264120000	176590000	271020000	234090000	198670000	206900000	169530000	209940000	136420000	212810000	156610000	228460000	191000000	198890000	185680000	241517500	178945000	1.34967	0.432611	0.0131198	0.0893403	202297500	201007500	1.00642	0.00922916	-0.234283	0.974932	201007500	178945000	1.12329	0.167733	0.0493371	0.351053	202297500	241517500	0.83761	-0.255649	-0.199064	0.222566	202297500	178945000	1.1305	0.176962	-0.14088	0.37284
Q3UER8	Fibrinogen gamma chain	Fgg	31	12083000	1077800000	192730	119480	5237500000	8974	109500000	106370	4398000000	3285700000	43851	51246	47449	61758	197820000	4042600000	2.72549e+08	1.92095e+09	0.141882	-2.81723	-4.29536	0.727515	1336778836	1.06013e+09	1.26095	0.334516	0.452965	0.923806	1.06013e+09	1.92095e+09	0.55188	-0.857575	-1.62985	0.862221	1336778836	2.72549e+08	4.90473	2.29417	4.00481	0.963819	1336778836	1.92095e+09	0.695895	-0.523058	-1.22506	0.794951
Q00623	Apolipoprotein A-I;Proapolipoprotein A-I;Truncated apolipoprotein A-I	Apoa1	30	24632000000	30984000000	24331000000	25988000000	30441000000	36099000000	25633000000	25446000000	21777000000	19442000000	30013000000	23507000000	33321000000	24231000000	30269000000	28878000000	26483750000	23684750000	1.11818	0.161149	-0.346772	0.391756	29404750000	29174750000	1.00788	0.0113289	-0.229847	0.973296	29174750000	23684750000	1.23179	0.300762	0.267204	0.13222	29404750000	26483750000	1.11029	0.150942	0.471279	0.412447	29404750000	23684750000	1.24151	0.312091	0.0684049	0.152873
P21614	Vitamin D-binding protein	Gc	30	4031500000	4740400000	3267000000	3334600000	3521600000	3505600000	3573200000	2737700000	3088300000	1892800000	3660600000	2783500000	3561100000	3619800000	3546300000	3222900000	3843375000	2856300000	1.34558	0.428226	0.00730608	0.0990738	3334525000	3487525000	0.956129	-0.0647223	-0.390523	0.581846	3487525000	2856300000	1.22099	0.288056	0.246395	0.162411	3334525000	3843375000	0.867603	-0.204892	-0.115381	0.289479	3334525000	2856300000	1.16743	0.223334	-0.0690606	0.297957
Q91X72	Hemopexin	Hpx	29	8651600000	9804100000	7268400000	8563100000	7341400000	7916500000	9482800000	8727100000	12874000000	8290100000	8656800000	10221000000	8926200000	7075400000	6486500000	6022700000	8571800000	10010475000	0.856283	-0.22384	-0.857171	0.322584	8366950000	7127700000	1.17386	0.231265	0.234821	0.164158	7127700000	10010475000	0.712024	-0.490002	-1.02786	0.0424569	8366950000	8571800000	0.976102	-0.0348964	0.16489	0.828197	8366950000	10010475000	0.835819	-0.258737	-0.815684	0.239397
P06728	Apolipoprotein A-IV	Apoa4	29	3926500000	4010000000	2549000000	3005500000	4086300000	3760700000	3265900000	3487100000	3234400000	2533400000	3932000000	2079900000	3713500000	3879400000	4586600000	3731700000	3372750000	2944925000	1.14528	0.195694	-0.300973	0.43008	3650000000	3977800000	0.917593	-0.124074	-0.515919	0.352338	3977800000	2944925000	1.35073	0.43374	0.484987	0.0624696	3650000000	3372750000	1.0822	0.113971	0.410326	0.486752	3650000000	2944925000	1.23942	0.309666	0.0646488	0.158166
P32261	Antithrombin-III	Serpinc1	29	3487100000	3533100000	2098800000	2804800000	2884500000	2229800000	2514700000	2559500000	2212600000	1794100000	2447200000	1600400000	2591700000	2390300000	2650200000	2336900000	2980950000	2013575000	1.48043	0.566013	0.189977	0.0435969	2547125000	2492275000	1.02201	0.0314065	-0.187428	0.821864	2492275000	2013575000	1.23774	0.307704	0.278573	0.0982201	2547125000	2980950000	0.854468	-0.226902	-0.151669	0.336185	2547125000	2013575000	1.26498	0.339111	0.110253	0.0960395
O89020	Afamin	Afm	29	1505500000	1462600000	951760000	1020000000	1145700000	1100900000	977060000	865590000	792040000	656120000	1126000000	604080000	1116600000	1171100000	1073600000	893960000	1234965000	794560000	1.55428	0.636242	0.283083	0.0361546	1022312500	1063815000	0.960987	-0.057411	-0.375077	0.689008	1063815000	794560000	1.33887	0.421019	0.464154	0.0712963	1022312500	1234965000	0.827807	-0.272634	-0.227066	0.245052	1022312500	794560000	1.28664	0.363608	0.148194	0.117372
Q8CG16	Complement C1r-A subcomponent;Complement C1r-A subcomponent heavy chain;Complement C1r-A subcomponent light chain;Complement C1r-B subcomponent;Complement C1r-B subcomponent heavy chain;Complement C1r-B subcomponent light chain	C1ra	29	91527000	98599000	73411000	73111000	118750000	82286000	86965000	90033000	89518000	60314000	73633000	58996000	89403000	90624000	86046000	88489000	84162000	70615250	1.19184	0.253189	-0.224749	0.237125	94508500	88640500	1.0662	0.0924781	-0.0583998	0.587258	88640500	70615250	1.25526	0.327986	0.31179	0.0761123	94508500	84162000	1.12294	0.167275	0.498208	0.377648	94508500	70615250	1.33836	0.420464	0.236252	0.068553
D3YXF5	Complement component 7	C7	28	493240000	434680000	374520000	423000000	661360000	552460000	401060000	339000000	332520000	384420000	499360000	303570000	571840000	556660000	587080000	606190000	431360000	379967500	1.13525	0.183016	-0.317781	0.349137	488470000	580442500	0.841548	-0.248883	-0.779608	0.199741	580442500	379967500	1.52761	0.611277	0.775747	0.00768637	488470000	431360000	1.1324	0.179378	0.518161	0.564739	488470000	379967500	1.28556	0.362394	0.146314	0.231983
P09470	Angiotensin-converting enzyme;Angiotensin-converting enzyme, soluble form	Ace	28	26319000	27866000	17849000	22504000	36574000	30501000	29289000	27653000	21563000	24541000	23187000	16985000	27219000	32155000	29010000	26297000	23634500	21569000	1.09576	0.131935	-0.385502	0.566897	31004250	28670250	1.08141	0.112912	-0.0152292	0.426256	28670250	21569000	1.32923	0.410595	0.447082	0.0351959	31004250	23634500	1.31182	0.391572	0.868003	0.0558664	31004250	21569000	1.43744	0.523507	0.395842	0.0181512
A0A0R4J038	Kininogen-1;Kininogen-1 heavy chain;Bradykinin;Kininogen-1 light chain	Kng1	28	3711700000	3730900000	2755400000	2963500000	3518700000	3324200000	3050200000	2752800000	3467400000	2860700000	3253400000	2499500000	3315100000	3655100000	3129100000	2896800000	3290375000	3020250000	1.08944	0.123584	-0.396573	0.539782	3161475000	3249025000	0.973053	-0.039409	-0.337043	0.76078	3249025000	3020250000	1.07575	0.105339	-0.0528485	0.514691	3161475000	3290375000	0.960825	-0.0576542	0.127369	0.758627	3161475000	3020250000	1.04676	0.0659298	-0.312845	0.68932
Q8K182	Complement component C8 alpha chain	C8a	27	260620000	220380000	201980000	230370000	433170000	283740000	418610000	299220000	511880000	347090000	354700000	435330000	437630000	409950000	347700000	370450000	228337500	412250000	0.553881	-0.852352	-1.69042	0.00191352	358685000	391432500	0.916339	-0.126046	-0.520085	0.434299	391432500	412250000	0.949503	-0.0747559	-0.347797	0.73741	358685000	228337500	1.57085	0.65155	1.29663	0.0095706	358685000	412250000	0.870067	-0.200802	-0.725955	0.369253
Q8BH35	Complement component C8 beta chain	C8b	27	428500000	355110000	347790000	392550000	709930000	466790000	702950000	524380000	848040000	572970000	609430000	716540000	705950000	651070000	610880000	627080000	380987500	686745000	0.554773	-0.850031	-1.68734	0.00166392	601012500	648745000	0.926423	-0.110257	-0.486725	0.44874	648745000	686745000	0.944667	-0.082123	-0.359862	0.699533	601012500	380987500	1.57751	0.657651	1.30669	0.00755359	601012500	686745000	0.875161	-0.19238	-0.712911	0.377195
Q07968	Coagulation factor XIII B chain	F13b	27	121690000	119440000	96304000	91607000	152270000	133940000	96327000	88191000	79865000	78511000	116260000	60568000	133720000	133580000	117590000	125990000	107260250	83801000	1.27994	0.356076	-0.0883469	0.133645	117682000	127720000	0.921406	-0.118091	-0.503277	0.448071	127720000	83801000	1.52409	0.607945	0.77029	0.0139363	117682000	107260250	1.09716	0.133778	0.442982	0.62744	117682000	83801000	1.4043	0.489854	0.343722	0.0975938
P06683	Complement component C9	C9	27	265470000	234990000	234200000	225600000	356690000	248100000	349030000	273780000	369040000	234340000	247660000	303900000	319740000	260400000	235250000	268070000	240065000	288735000	0.831437	-0.266321	-0.91349	0.237888	306900000	270865000	1.13304	0.180195	0.126923	0.329837	270865000	288735000	0.938109	-0.092172	-0.37632	0.698818	306900000	240065000	1.2784	0.354344	0.806626	0.068815	306900000	288735000	1.06291	0.0880226	-0.278628	0.669293
Q8BH61	Coagulation factor XIII A chain	F13a1	27	110400000	144990000	35739000	64854000	228980000	38539000	85696000	72538000	96154000	112670000	81483000	22557000	83677000	72127000	110270000	165030000	88995750	78216000	1.13782	0.186273	-0.313464	0.71586	106438250	107776000	0.987588	-0.0180193	-0.291852	0.647986	107776000	78216000	1.37793	0.4625	0.532089	0.264858	106438250	88995750	1.19599	0.258208	0.648129	0.822527	106438250	78216000	1.36082	0.444481	0.273449	0.589852
Q61704	Inter-alpha-trypsin inhibitor heavy chain H3	Itih3	26	190470000	194650000	162810000	223910000	136820000	121380000	156450000	126100000	452260000	385980000	141880000	238760000	173530000	169160000	118180000	104580000	192960000	304720000	0.633237	-0.659182	-1.43433	0.168816	135187500	141362500	0.956318	-0.0644377	-0.389922	0.856929	141362500	304720000	0.463909	-1.10808	-2.04012	0.0267689	135187500	192960000	0.700599	-0.51334	-0.623916	0.00994132	135187500	304720000	0.443645	-1.17252	-2.23094	0.0175264
P23953	Carboxylesterase 1C	Ces1c	26	12359000000	11760000000	8481300000	9504000000	10166000000	11270000000	7965400000	8119800000	6963000000	6661100000	8872100000	5940500000	10073000000	10899000000	9229500000	7605400000	10526075000	7109175000	1.48063	0.566214	0.190243	0.0229303	9380300000	9451725000	0.992443	-0.0109436	-0.276903	0.936091	9451725000	7109175000	1.32951	0.410896	0.447574	0.0559216	9380300000	10526075000	0.891149	-0.166262	-0.0516911	0.404321	9380300000	7109175000	1.31946	0.399952	0.204483	0.075597
E9Q8B5	Predicted gene 4788	Gm4788	26	86963000	85052000	66583000	62081000	88772000	64722000	88818000	59601000	100740000	58640000	80974000	74787000	90654000	82332000	71790000	74032000	75169750	78785250	0.954109	-0.0677734	-0.650265	0.803434	75478250	79702000	0.947006	-0.078555	-0.419748	0.595281	79702000	78785250	1.01164	0.0166904	-0.198032	0.853241	75478250	75169750	1.0041	0.00590877	0.232165	0.992743	75478250	78785250	0.958025	-0.0618646	-0.510771	0.804359
P26262	Plasma kallikrein;Plasma kallikrein heavy chain;Plasma kallikrein light chain	Klkb1	26	756990000	727840000	588210000	597000000	739480000	698550000	612190000	530300000	558210000	428190000	639640000	444260000	740060000	706110000	672950000	640420000	667510000	517575000	1.28969	0.367022	-0.0738361	0.0913405	645130000	689885000	0.935127	-0.096766	-0.458223	0.45457	689885000	517575000	1.33292	0.414588	0.453621	0.0366903	645130000	667510000	0.966472	-0.0491995	0.141308	0.761343	645130000	517575000	1.24645	0.317822	0.0772813	0.136509
P52480-2	Pyruvate kinase PKM	Pkm	26	37731000	30859000	26523000	29468000	39765000	40142000	29619000	32992000	76513000	78665000	32660000	33765000	34662000	38768000	31438000	25539000	31145250	55400750	0.562181	-0.830893	-1.66197	0.0654341	35629500	32601750	1.09287	0.128123	0.0169084	0.460111	32601750	55400750	0.588471	-0.764956	-1.47817	0.0892798	35629500	31145250	1.14398	0.19406	0.542368	0.284628	35629500	55400750	0.643123	-0.636833	-1.40127	0.161928
P42703	Leukemia inhibitory factor receptor	Lifr	25	154280000	133960000	96446000	112440000	222630000	150420000	208430000	157390000	212990000	141810000	216050000	189300000	196920000	201920000	176390000	169760000	124281500	190037500	0.653984	-0.612673	-1.37267	0.0224025	184717500	186247500	0.991785	-0.0119005	-0.278925	0.862427	186247500	190037500	0.980057	-0.0290631	-0.272964	0.942735	184717500	124281500	1.48628	0.571709	1.16499	0.0243354	184717500	190037500	0.972006	-0.0409636	-0.4784	0.848554
Q01339	Beta-2-glycoprotein 1	Apoh	25	2937700000	3328500000	2390200000	2346700000	2338200000	2358300000	2003200000	1761800000	2158200000	1466600000	2376100000	1572900000	2352300000	2170200000	2084700000	2092400000	2750775000	1893450000	1.45278	0.538821	0.153927	0.0372409	2115375000	2174900000	0.972631	-0.0400356	-0.338367	0.718763	2174900000	1893450000	1.14864	0.199932	0.10207	0.269369	2115375000	2750775000	0.769011	-0.378925	-0.402307	0.0637008	2115375000	1893450000	1.11721	0.159896	-0.167312	0.42276
Q61129	Complement factor I;Complement factor I heavy chain;Complement factor I light chain	Cfi	25	916300000	825420000	637360000	583780000	758020000	693010000	628810000	545770000	731490000	667420000	591060000	513960000	692730000	657050000	501570000	554780000	740715000	625982500	1.18328	0.242796	-0.238528	0.305088	656402500	601532500	1.09122	0.125938	0.0122925	0.442486	601532500	625982500	0.960941	-0.0574796	-0.319503	0.759542	656402500	740715000	0.886174	-0.174338	-0.0650062	0.427032	656402500	625982500	1.0486	0.0684584	-0.308929	0.70988
E9Q6C2	Complement C1s-A subcomponent;Complement C1s-A subcomponent heavy chain;Complement C1s-A subcomponent light chain	C1s1	25	166750000	177290000	123870000	136220000	179320000	136060000	132960000	139850000	152660000	99292000	122240000	94828000	141820000	135240000	124790000	119990000	151032500	117255000	1.28807	0.36521	-0.0762382	0.120166	147047500	130460000	1.12715	0.172675	0.111035	0.254052	130460000	117255000	1.11262	0.153958	0.0267772	0.371434	147047500	151032500	0.973615	-0.0385768	0.158822	0.848775	147047500	117255000	1.25408	0.326633	0.0909274	0.133495
Q61646	Haptoglobin;Haptoglobin alpha chain;Haptoglobin beta chain	Hp	24	2288100000	3490000000	2254100000	4556000000	334020000	445950000	2856600000	1417800000	8454600000	2434000000	2382800000	5209300000	1393200000	604280000	323230000	246060000	3147050000	4620175000	0.681154	-0.553947	-1.29481	0.386129	1263592500	641692500	1.96916	0.977577	1.81159	0.353551	641692500	4620175000	0.138889	-2.84799	-4.88964	0.00111982	1263592500	3147050000	0.401516	-1.31647	-1.94803	0.0289382	1263592500	4620175000	0.273495	-1.87042	-3.31183	0.0170327
G3X977	Inter-alpha-trypsin inhibitor heavy chain H2	Itih2	23	1314400000	1279300000	881290000	941690000	823970000	852850000	661380000	632360000	1004800000	1149400000	812820000	665200000	909540000	971330000	762640000	689520000	1104170000	908055000	1.21597	0.282111	-0.186407	0.254371	742640000	833257500	0.891249	-0.166099	-0.604707	0.345447	833257500	908055000	0.917629	-0.124017	-0.428474	0.632024	742640000	1104170000	0.672578	-0.572227	-0.721003	0.0192035	742640000	908055000	0.817836	-0.290117	-0.864284	0.246436
F8WI14	Extracellular matrix protein 1	Ecm1	23	115740000	139310000	64525000	84598000	159710000	62156000	97070000	67971000	141380000	123930000	91310000	61001000	77548000	76942000	80298000	129900000	101043250	104405250	0.967799	-0.0472213	-0.623018	0.914187	96726750	91172000	1.06093	0.0853241	-0.0735143	0.956531	91172000	104405250	0.873251	-0.195532	-0.545596	0.605088	96726750	101043250	0.957281	-0.0629861	0.118578	0.772971	96726750	104405250	0.926455	-0.110207	-0.585644	0.708892
Q01279	Epidermal growth factor receptor	Egfr	22	476770000	360370000	387340000	437220000	949050000	611630000	927480000	792390000	1008800000	658380000	770990000	798290000	972600000	900400000	789240000	733820000	415425000	809115000	0.513431	-0.961757	-1.83546	0.000895725	820137500	849015000	0.965987	-0.0499242	-0.359259	0.73133	849015000	809115000	1.04931	0.0694453	-0.111633	0.678932	820137500	415425000	1.97421	0.981278	1.84025	0.00072608	820137500	809115000	1.01362	0.019521	-0.384722	0.943411
Q3UPN1	Vascular cell adhesion protein 1	Vcam1	22	35650000	38893000	26573000	27030000	32313000	35276000	23899000	21513000	26094000	22903000	32596000	17320000	31857000	31025000	26866000	22432000	32036500	24728250	1.29554	0.373556	-0.0651724	0.143844	28250250	28045000	1.00732	0.0105201	-0.231556	0.977565	28045000	24728250	1.13413	0.181583	0.0720203	0.389165	28250250	32036500	0.881814	-0.181453	-0.0767368	0.407503	28250250	24728250	1.14243	0.192103	-0.117429	0.454517
Q9R098	Hepatocyte growth factor activator;Hepatocyte growth factor activator short chain;Hepatocyte growth factor activator long chain	Hgfac	21	153680000	161160000	121700000	138290000	124220000	127290000	116630000	108780000	114480000	68358000	111820000	89323000	118280000	105470000	112230000	118940000	143707500	95995250	1.49703	0.5821	0.211305	0.0217708	119230000	113730000	1.04836	0.0681344	-0.109832	0.543409	113730000	95995250	1.18475	0.244578	0.175189	0.197581	119230000	143707500	0.829671	-0.269388	-0.221715	0.0968334	119230000	95995250	1.24204	0.312712	0.0693676	0.129221
O09159	Lysosomal alpha-mannosidase	Man2b1	21	30233000	26643000	20199000	24148000	34050000	29734000	30351000	26146000	27861000	14894000	31387000	17339000	34596000	39566000	29894000	27100000	25305750	22870250	1.10649	0.145993	-0.366864	0.49305	30070250	32789000	0.917083	-0.124875	-0.517611	0.47177	32789000	22870250	1.4337	0.51974	0.625833	0.0662885	30070250	25305750	1.18828	0.248872	0.632735	0.158216	30070250	22870250	1.31482	0.394865	0.196604	0.121661
Q9ESB3	Histidine-rich glycoprotein	Hrg	21	1689200000	1973700000	1244900000	1473000000	1588400000	1496600000	1378900000	1283800000	1648000000	1017000000	1446400000	1063500000	1547200000	1564300000	1338500000	1151100000	1595200000	1293725000	1.23303	0.302206	-0.159765	0.214805	1436925000	1400275000	1.02617	0.0372746	-0.17503	0.764395	1400275000	1293725000	1.08236	0.114179	-0.0383703	0.541031	1436925000	1595200000	0.90078	-0.150753	-0.0261214	0.459399	1436925000	1293725000	1.11069	0.151454	-0.180387	0.408473
F8VQ07	Albumin superfamily member 1	Albfm1	21	45009000	44326000	28940000	32545000	33506000	32751000	25440000	23969000	26751000	29553000	36572000	18367000	35574000	38321000	32936000	33494000	37705000	27810750	1.35577	0.439113	0.0217395	0.116137	28916500	35081250	0.824272	-0.278807	-0.842829	0.0829345	35081250	27810750	1.26143	0.335058	0.323371	0.123056	28916500	37705000	0.766914	-0.382863	-0.4088	0.107328	28916500	27810750	1.03976	0.0562503	-0.327837	0.740852
Q9DBB9	Carboxypeptidase N subunit 2	Cpn2	20	916740000	878440000	634020000	742390000	760190000	784900000	636110000	634840000	606590000	475930000	687340000	445200000	774470000	751820000	698900000	586840000	792897500	553765000	1.43183	0.517861	0.126139	0.0370988	704010000	703007500	1.00143	0.00205584	-0.249439	0.982064	703007500	553765000	1.26951	0.344266	0.338452	0.0958849	704010000	792897500	0.887895	-0.171538	-0.0603909	0.355501	704010000	553765000	1.27132	0.346322	0.121422	0.0977575
Q06890	Clusterin;Clusterin beta chain;Clusterin alpha chain	Clu	20	1341800000	1388700000	1083200000	1316700000	1408100000	1266000000	1237100000	996350000	1516400000	958060000	1200700000	1056900000	1332000000	1195700000	1052300000	1069700000	1282600000	1183015000	1.08418	0.116603	-0.405828	0.520957	1226887500	1162425000	1.05546	0.0778653	-0.0892727	0.62786	1162425000	1183015000	0.982595	-0.0253307	-0.266851	0.957964	1226887500	1282600000	0.956563	-0.0640683	0.116794	0.674343	1226887500	1183015000	1.03709	0.0525346	-0.333592	0.759196
A0A0R4J0S2	Insulin-like growth factor-binding protein complex acid labile subunit	Igfals	20	230190000	250720000	162040000	138160000	206270000	163290000	171840000	136110000	165260000	91462000	181360000	112360000	184030000	174540000	167670000	137480000	195277500	137610500	1.41906	0.504935	0.109003	0.114917	169377500	165930000	1.02078	0.0296675	-0.191102	0.893407	165930000	137610500	1.20579	0.269984	0.216798	0.231205	169377500	195277500	0.867368	-0.205283	-0.116026	0.464985	169377500	137610500	1.23085	0.299652	0.0491394	0.226533
P97290	Plasma protease C1 inhibitor	Serping1	19	1043300000	1094400000	780220000	986070000	727330000	799420000	669420000	607660000	732790000	545090000	784150000	553070000	798540000	781960000	707650000	666990000	975997500	653775000	1.49286	0.578083	0.205979	0.0187686	700957500	738785000	0.948798	-0.0758276	-0.413986	0.551766	738785000	653775000	1.13003	0.17636	0.0634663	0.308471	700957500	975997500	0.718196	-0.47755	-0.56491	0.0183577	700957500	653775000	1.07217	0.100533	-0.259253	0.567931
Q03311	Cholinesterase	Bche	19	87846000	82597000	55958000	65112000	68201000	71475000	49634000	52177000	42115000	41138000	51252000	32749000	59613000	58655000	49793000	43881000	72878250	41813500	1.74294	0.80152	0.5022	0.00596373	60371750	52985500	1.1394	0.188276	0.143996	0.327109	52985500	41813500	1.26719	0.341629	0.334133	0.100874	60371750	72878250	0.828392	-0.271615	-0.225386	0.229371	60371750	41813500	1.44383	0.529905	0.405752	0.0324446
Q61233	Plastin-2	Lcp1	19	12842000	11590000	8364600	10193000	8708800	9982200	9598700	9219400	7040300	7039000	7669100	5687600	9056100	9349600	7662900	6175300	10747400	6859000	1.5669	0.647918	0.298562	0.0104405	9377275	8060975	1.16329	0.218214	0.207249	0.166227	8060975	6859000	1.17524	0.232956	0.156155	0.265928	9377275	10747400	0.872516	-0.196747	-0.101952	0.297873	9377275	6859000	1.36715	0.45117	0.283809	0.0185279
P07724	Serum albumin	Alb	19	79271000	9480900	14622000	19671000	11043000	10054000	1665300	5637200	4014700	5759300	4263700	4952400	11203000	4136700	12026000	7930600	30761225	4747525	6.47942	2.69587	3.01363	0.00465155	7099875	8824075	0.804603	-0.313651	-0.916446	0.437591	8824075	4747525	1.85867	0.894269	1.23921	0.0445924	7099875	30761225	0.230806	-2.11525	-3.26497	0.0415222	7099875	4747525	1.49549	0.580618	0.484296	0.636897
O88968	Transcobalamin-2	Tcn2	19	101910000	98498000	65837000	80384000	86954000	77662000	73462000	67913000	71394000	60163000	84482000	51836000	84463000	76825000	72806000	64615000	86657250	66968750	1.294	0.371832	-0.067458	0.133693	76497750	74677250	1.02438	0.0347485	-0.180367	0.793487	74677250	66968750	1.11511	0.157181	0.0320551	0.387115	76497750	86657250	0.882762	-0.179903	-0.0741817	0.383953	76497750	66968750	1.14229	0.191929	-0.117699	0.311463
Q91WP0	Mannan-binding lectin serine protease 2;Mannan-binding lectin serine protease 2 A chain;Mannan-binding lectin serine protease 2 B chain	Masp2	19	93464000	102670000	62441000	78395000	81476000	81789000	71901000	62270000	79115000	40693000	66968000	51370000	87043000	72835000	68659000	67408000	84242500	59536500	1.41497	0.500774	0.103486	0.0792759	74359000	73986250	1.00504	0.00725019	-0.238464	0.967105	73986250	59536500	1.2427	0.313483	0.288037	0.161287	74359000	84242500	0.882678	-0.180041	-0.0744088	0.41778	74359000	59536500	1.24896	0.320733	0.0817898	0.166897
Q62351	Transferrin receptor protein 1	Tfrc	19	39513000	32807000	23287000	26928000	31604000	30555000	17729000	18650000	19881000	38229000	32047000	23993000	25936000	32103000	27755000	22742000	30633750	28537500	1.07346	0.102263	-0.42484	0.664635	24634500	27134000	0.907883	-0.139422	-0.548344	0.464661	27134000	28537500	0.950819	-0.0727572	-0.344524	0.873921	24634500	30633750	0.804162	-0.314442	-0.295994	0.237194	24634500	28537500	0.863233	-0.212179	-0.743575	0.476286
Q8BPB5	EGF-containing fibulin-like extracellular matrix protein 1	Efemp1	19	32796000	30770000	23689000	29110000	33868000	24499000	25281000	21390000	26826000	29548000	31125000	21497000	29901000	25983000	23918000	27814000	29091250	27249000	1.06761	0.094382	-0.435288	0.623048	26259500	26904000	0.976044	-0.0349812	-0.327688	0.76234	26904000	27249000	0.987339	-0.0183826	-0.255472	0.957496	26259500	29091250	0.90266	-0.147746	-0.0211643	0.415073	26259500	27249000	0.963687	-0.0533638	-0.497605	0.773968
Q8BK48	Pyrethroid hydrolase Ces2e	Ces2e	18	79442000	83417000	62767000	85780000	63924000	76436000	59673000	50284000	32221000	15505000	37821000	24393000	61819000	63150000	55617000	53708000	77851500	27485000	2.83251	1.50208	1.43097	0.00047616	62579250	58573500	1.06839	0.0954363	-0.0521499	0.596895	58573500	27485000	2.13111	1.0916	1.5624	0.00243228	62579250	77851500	0.803828	-0.31504	-0.296981	0.106813	62579250	27485000	2.27685	1.18704	1.42351	0.00253334
G3X8T9	Serine protease inhibitor A3N	Serpina3n	18	598990000	677710000	464400000	1071400000	527900000	560360000	492680000	468070000	930230000	546040000	475480000	443280000	494590000	457100000	446060000	405490000	703125000	598757500	1.17431	0.231809	-0.253094	0.49941	512252500	450810000	1.13629	0.184336	0.135671	0.146371	450810000	598757500	0.752909	-0.409452	-0.895943	0.191578	512252500	703125000	0.728537	-0.456926	-0.530907	0.153011	512252500	598757500	0.855526	-0.225117	-0.763613	0.531002
A2CEK7	Major urinary protein 12	Mup12	18	205190000	151550000	183110000	195100000	363270000	256270000	491720000	372900000	560730000	45077000	421390000	437790000	415480000	219030000	183760000	273790000	183737500	366246750	0.501677	-0.99517	-1.87976	0.496565	371040000	273015000	1.35905	0.442595	0.681306	0.145191	273015000	366246750	0.74544	-0.423836	-0.919499	0.993283	371040000	183737500	2.0194	1.01393	1.89408	0.00175332	371040000	366246750	1.01309	0.0187588	-0.385903	0.55046
Q8VCS0	N-acetylmuramoyl-L-alanine amidase	Pglyrp2	18	201210000	217080000	159150000	163670000	205420000	192690000	178320000	166530000	168870000	177270000	194650000	160420000	176480000	152380000	172820000	143040000	185277500	175302500	1.0569	0.0798411	-0.454565	0.696847	185740000	161180000	1.15238	0.204612	0.17851	0.136412	161180000	175302500	0.919439	-0.121174	-0.423817	0.427044	185740000	185277500	1.0025	0.00359685	0.228353	0.941457	185740000	175302500	1.05954	0.083438	-0.285729	0.599309
P26928	Hepatocyte growth factor-like protein;Hepatocyte growth factor-like protein alpha chain;Hepatocyte growth factor-like protein beta chain	Mst1	18	50517000	47285000	35513000	39960000	47376000	39331000	46919000	34869000	45627000	35121000	40531000	31729000	44058000	40027000	39726000	34930000	43318750	38252000	1.13246	0.179456	-0.3225	0.385584	42123750	39685250	1.06145	0.086031	-0.0720208	0.593734	39685250	38252000	1.03747	0.0530677	-0.138455	0.721414	42123750	43318750	0.972414	-0.0403577	0.155885	0.831073	42123750	38252000	1.10122	0.139099	-0.199522	0.471065
E9Q6I2	Interleukin-1 receptor accessory protein	Il1rap	18	932580000	871850000	630890000	676600000	804100000	816320000	608350000	552850000	515430000	343520000	606960000	376870000	748600000	776170000	698790000	621230000	777980000	460695000	1.68871	0.755921	0.441748	0.0116127	695405000	711197500	0.977794	-0.0323968	-0.322228	0.778706	711197500	460695000	1.54375	0.626438	0.800577	0.013813	695405000	777980000	0.89386	-0.16188	-0.0444665	0.442438	695405000	460695000	1.50947	0.594041	0.505086	0.0341654
P55065	Phospholipid transfer protein	Pltp	18	96343000	118810000	69379000	99706000	100380000	92800000	85100000	83767000	83103000	60224000	88652000	59645000	84399000	70947000	115460000	93027000	96059500	72906000	1.31758	0.397891	-0.0329112	0.125327	90511750	90958250	0.995091	-0.00709941	-0.268781	0.946055	90958250	72906000	1.24761	0.319167	0.297346	0.176	90511750	96059500	0.942247	-0.0858232	0.080927	0.739523	90511750	72906000	1.24149	0.312068	0.0683689	0.118234
Q06770	Corticosteroid-binding globulin	Serpina6	17	1528100000	1626900000	1030500000	1209300000	889990000	1285000000	578100000	716880000	450670000	712900000	824140000	394390000	884460000	1008600000	966530000	850400000	1348700000	595525000	2.26472	1.17934	1.00309	0.00230415	867492500	927497500	0.935304	-0.0964921	-0.457645	0.52799	927497500	595525000	1.55745	0.639181	0.821447	0.0231775	867492500	1348700000	0.643206	-0.636646	-0.82721	0.0373353	867492500	595525000	1.45669	0.542689	0.425552	0.134075
Q3UTR7	Angiotensinogen;Angiotensin-1;Angiotensin-2;Angiotensin-3;Angiotensin-4;Angiotensin 1-9;Angiotensin 1-7;Angiotensin 1-5;Angiotensin 1-4	Agt	17	466600000	495590000	314400000	361790000	336570000	363630000	294070000	278490000	313990000	227000000	416110000	226280000	318490000	360860000	284240000	241810000	409595000	295845000	1.38449	0.469357	0.0618346	0.0927169	318190000	301350000	1.05588	0.0784484	-0.0880408	0.605705	301350000	295845000	1.01861	0.0265986	-0.181805	0.813116	318190000	409595000	0.776841	-0.36431	-0.378211	0.100894	318190000	295845000	1.07553	0.105047	-0.252261	0.554111
Q6S9I3	Bradykinin	Kng2	17	223850000	230130000	160780000	216110000	184830000	183890000	165330000	145830000	186020000	157890000	180400000	133320000	173960000	182370000	162860000	143590000	207717500	164407500	1.26343	0.337347	-0.113178	0.122844	169970000	165695000	1.0258	0.0367501	-0.176139	0.791731	165695000	164407500	1.00783	0.011254	-0.206935	0.918274	169970000	207717500	0.818275	-0.289343	-0.254614	0.126208	169970000	164407500	1.03383	0.048004	-0.340608	0.76684
P08071	Lactotransferrin	Ltf	17	10884000	8359900	8732700	9955500	8568000	9101200	11140000	8895200	17451000	9006100	10425000	11180000	9584800	9331200	6973000	5602200	9483025	12015525	0.789231	-0.34148	-1.01313	0.229544	9426100	7872800	1.1973	0.259784	0.295075	0.18889	7872800	12015525	0.655219	-0.609951	-1.22431	0.0520997	9426100	9483025	0.993997	-0.00868635	0.208102	0.956709	9426100	12015525	0.784493	-0.350167	-0.957289	0.211594
P63260	Actin, cytoplasmic 2;Actin, cytoplasmic 2, N-terminally processed	Actg1	17	176820000	186600000	142240000	158510000	167630000	173800000	156700000	134170000	136020000	131660000	123700000	112130000	160950000	166530000	110990000	125540000	166042500	125877500	1.31908	0.399532	-0.0307351	0.0432636	158075000	141002500	1.12108	0.164888	0.0945847	0.32225	141002500	125877500	1.12016	0.1637	0.0427324	0.436152	158075000	166042500	0.952015	-0.0709433	0.105459	0.652529	158075000	125877500	1.25578	0.328589	0.0939567	0.0714621
Q9CPY7	Cytosol aminopeptidase	Lap3	17	219890000	245300000	138860000	169610000	217740000	180390000	149200000	128660000	146320000	195340000	154220000	105710000	211790000	176000000	106050000	118050000	193415000	150397500	1.28603	0.362919	-0.0792748	0.197851	168997500	152972500	1.10476	0.14373	0.0498814	0.536145	152972500	150397500	1.01712	0.0244917	-0.185255	0.998527	168997500	193415000	0.873756	-0.194698	-0.0985735	0.455142	168997500	150397500	1.12367	0.168221	-0.154418	0.500977
Q64726	Zinc-alpha-2-glycoprotein	Azgp1	17	954520000	1053800000	744680000	745280000	887090000	973760000	792340000	731480000	909120000	562600000	835270000	650510000	950020000	868230000	762430000	690560000	874570000	739375000	1.18285	0.242268	-0.239229	0.287107	846167500	817810000	1.03467	0.0491776	-0.149883	0.739489	817810000	739375000	1.10608	0.145459	0.0128586	0.448466	846167500	874570000	0.967524	-0.0476306	0.143895	0.826043	846167500	739375000	1.14444	0.194637	-0.113506	0.327203
P49182	Heparin cofactor 2	Serpind1	17	452340000	507480000	317790000	323960000	379430000	394860000	329450000	330320000	379610000	236140000	370390000	257350000	394990000	371120000	386180000	331500000	400392500	310872500	1.28796	0.365092	-0.0763942	0.176536	358515000	370947500	0.966484	-0.0491815	-0.35769	0.678435	370947500	310872500	1.19325	0.254892	0.192081	0.19172	358515000	400392500	0.895409	-0.159381	-0.0403478	0.504864	358515000	310872500	1.15325	0.20571	-0.0963552	0.292717
Q9QXC1	Fetuin-B	Fetub	17	1042800000	1000100000	679600000	826650000	1017400000	979890000	927430000	860620000	1030900000	751630000	999010000	813180000	967010000	1077900000	875060000	801570000	887287500	898680000	0.987323	-0.0184059	-0.584816	0.903221	946335000	930385000	1.01714	0.0245231	-0.201971	0.818634	930385000	898680000	1.03528	0.0500203	-0.143446	0.764176	946335000	887287500	1.06655	0.0929493	0.375668	0.533178	946335000	898680000	1.05303	0.0745435	-0.299505	0.627578
P98064	Mannan-binding lectin serine protease 1;Mannan-binding lectin serine protease 1 heavy chain;Mannan-binding lectin serine protease 1 light chain	Masp1	17	50557000	52816000	37787000	48623000	54798000	44138000	54399000	42396000	57683000	33134000	44508000	37308000	53636000	44103000	50072000	45098000	47445750	43158250	1.09934	0.136642	-0.379261	0.497951	48932750	48227250	1.01463	0.0209518	-0.209516	0.911737	48227250	43158250	1.11745	0.160212	0.0370197	0.374577	48932750	47445750	1.03134	0.0445215	0.295825	0.787529	48932750	43158250	1.1338	0.181164	-0.134372	0.369274
A0A075B5P6	Immunoglobulinmu chain C region	Ighm	16	251710000	355150000	132340000	137140000	144100000	90871000	39860000	33488000	183860000	129850000	148800000	91795000	29568000	26313000	74036000	25046000	219085000	138576250	1.58097	0.660811	0.315655	0.151522	77079750	38740750	1.98963	0.9925	1.84311	0.14114	38740750	138576250	0.279563	-1.83876	-3.23677	0.000747587	77079750	219085000	0.351826	-1.50707	-2.26226	0.0154519	77079750	138576250	0.556226	-0.846256	-1.72562	0.0566651
A0A0R4J131	Biotinidase	Btd	16	75379000	80099000	42965000	78224000	65071000	61724000	43205000	42576000	35591000	28765000	35867000	24054000	52039000	42537000	39381000	40965000	69166750	31069250	2.22621	1.15459	0.970284	0.00189398	53144000	43730500	1.21526	0.281267	0.340462	0.197153	43730500	31069250	1.40752	0.493152	0.582289	0.0257535	53144000	69166750	0.768346	-0.380172	-0.404363	0.193874	53144000	31069250	1.7105	0.774419	0.784452	0.00861382
Q8R121	Protein Z-dependent protease inhibitor	Serpina10	16	356540000	406500000	262130000	381650000	289240000	291940000	263460000	249560000	282880000	169080000	235690000	210270000	323730000	234610000	243390000	227290000	351705000	224480000	1.56675	0.647779	0.298378	0.0183609	273550000	257255000	1.06334	0.0886054	-0.0665817	0.505997	257255000	224480000	1.146	0.196612	0.0966335	0.344484	273550000	351705000	0.777783	-0.362561	-0.375329	0.0747248	273550000	224480000	1.21859	0.285218	0.0267842	0.146808
P00687	Alpha-amylase 1;Alpha-amylase	Amy1	16	67144000	62532000	48482000	56049000	50493000	51806000	45749000	38894000	39934000	27525000	59720000	31990000	50096000	47562000	44120000	42012000	58551750	39792250	1.47144	0.557225	0.178326	0.0459383	46735500	45947500	1.01715	0.0245325	-0.201951	0.888611	45947500	39792250	1.15468	0.207499	0.114463	0.303511	46735500	58551750	0.798191	-0.325193	-0.313721	0.0800624	46735500	39792250	1.17449	0.232031	-0.0555899	0.295718
P33587	Vitamin K-dependent protein C;Vitamin K-dependent protein C light chain;Vitamin K-dependent protein C heavy chain;Activation peptide	Proc	16	54488000	55425000	38466000	44432000	47801000	38844000	41770000	36277000	57563000	34719000	36162000	35985000	44710000	37705000	35580000	35856000	48202750	41107250	1.17261	0.229723	-0.25586	0.308414	41173000	38462750	1.07046	0.0982367	-0.0462334	0.491609	38462750	41107250	0.935668	-0.0959309	-0.382476	0.743804	41173000	48202750	0.854163	-0.227417	-0.152517	0.234361	41173000	41107250	1.0016	0.00230571	-0.411385	0.895852
A8DUK4	Hemoglobin subunit beta-1	Hbbt1	16	13709000000	8398800000	5493900000	3129200000	4979800000	16037000000	5244200000	15872000000	939310000	799000000	2901400000	4338500000	5514700000	9874800000	3492500000	1465300000	7682725000	2244552500	3.42283	1.77519	1.79304	0.0159855	10533250000	5086825000	2.07069	1.05011	1.96484	0.123714	5086825000	2244552500	2.2663	1.18034	1.70772	0.125333	10533250000	7682725000	1.37103	0.455261	0.973007	0.469692	10533250000	2244552500	4.69281	2.23045	3.03953	0.00692577
P52430	Serum paraoxonase/arylesterase 1	Pon1	16	1635400000	1737200000	1254600000	1342700000	1668700000	1642600000	1060800000	1104800000	831810000	609560000	1461900000	722980000	1674900000	1318500000	1286500000	1080600000	1492475000	906562500	1.6463	0.719228	0.393102	0.0225417	1369225000	1340125000	1.02171	0.030992	-0.188304	0.940568	1340125000	906562500	1.47825	0.563889	0.698138	0.0561863	1369225000	1492475000	0.917419	-0.124347	0.0174128	0.514759	1369225000	906562500	1.51035	0.594881	0.506386	0.0668492
P16301	Phosphatidylcholine-sterol acyltransferase	Lcat	16	461150000	547380000	367480000	497580000	465500000	471440000	426240000	401590000	470510000	471400000	485720000	354100000	471640000	424140000	442040000	420200000	468397500	445432500	1.05156	0.0725266	-0.464263	0.734551	441192500	439505000	1.00384	0.00552869	-0.242101	0.971423	439505000	445432500	0.986693	-0.0193272	-0.257019	0.953168	441192500	468397500	0.941919	-0.0863251	0.0800995	0.652174	441192500	445432500	0.990481	-0.0137986	-0.436327	0.974147
Q61247	Alpha-2-antiplasmin	Serpinf2	16	1110300000	1166600000	737410000	977930000	1206300000	970720000	894730000	897820000	896860000	756400000	870270000	647090000	1007200000	1008900000	957450000	966360000	998060000	792655000	1.25914	0.332433	-0.119691	0.158006	992392500	984977500	1.00753	0.0108201	-0.230922	0.99893	984977500	792655000	1.24263	0.313398	0.287898	0.0676236	992392500	998060000	0.994321	-0.00821572	0.208878	0.989636	992392500	792655000	1.25199	0.324218	0.087187	0.110058
P97449	Aminopeptidase N	Anpep	15	15916000	16078000	11468000	14803000	12605000	13064000	10803000	12207000	6238400	6982800	8052900	6497700	11896000	8398500	7601600	8969900	14566250	6942950	2.09799	1.06901	0.856824	0.000310764	12169750	9216500	1.32043	0.401009	0.593445	0.0311656	9216500	6942950	1.32746	0.40867	0.443929	0.0624206	12169750	14566250	0.835476	-0.25933	-0.205132	0.145311	12169750	6942950	1.75282	0.809679	0.839061	0.000733939
P45700	Mannosyl-oligosaccharide 1,2-alpha-mannosidase IA	Man1a1	15	30964000	29399000	22025000	25625000	23759000	26729000	20807000	21168000	16658000	11738000	21351000	13692000	23986000	21307000	20572000	19726000	27003250	15859750	1.70263	0.767763	0.457447	0.00782016	23115750	21397750	1.08029	0.111417	-0.0183866	0.421481	21397750	15859750	1.34919	0.432089	0.482283	0.0534424	23115750	27003250	0.856036	-0.224257	-0.147307	0.210947	23115750	15859750	1.45751	0.543506	0.426817	0.0291844
P97298	Pigment epithelium-derived factor	Serpinf1	15	134460000	172870000	103780000	116250000	117070000	111070000	114880000	100650000	96220000	57255000	131650000	65704000	116080000	102320000	93951000	89115000	131840000	87707250	1.50318	0.58802	0.219153	0.062623	110917500	100366500	1.10512	0.144209	0.0508947	0.260012	100366500	87707250	1.14434	0.19451	0.0931903	0.354376	110917500	131840000	0.841304	-0.249301	-0.188598	0.246103	110917500	87707250	1.26463	0.338719	0.109646	0.160692
P20029	78 kDa glucose-regulated protein	Hspa5	15	19203000	19441000	13932000	16537000	16258000	16535000	15066000	13179000	16505000	12438000	13140000	10425000	15442000	16828000	13508000	12632000	17278250	13127000	1.31624	0.39642	-0.0348612	0.0818508	15259500	14602500	1.04499	0.0634923	-0.119639	0.639879	14602500	13127000	1.1124	0.153678	0.0263187	0.404209	15259500	17278250	0.883162	-0.179249	-0.0731039	0.310968	15259500	13127000	1.16245	0.21717	-0.0786062	0.248643
P01898	H-2 class I histocompatibility antigen, Q10 alpha chain	H2-Q10	15	1386600000	1921200000	1229900000	1195100000	1222400000	1457100000	1085500000	1164300000	946790000	454770000	1198400000	838250000	1411500000	727630000	1224900000	1164000000	1433200000	859552500	1.66738	0.737582	0.417435	0.0337994	1232325000	1132007500	1.08862	0.122499	0.00502724	0.496275	1132007500	859552500	1.31697	0.397226	0.425187	0.21884	1232325000	1433200000	0.859842	-0.217857	-0.136756	0.324507	1232325000	859552500	1.43368	0.519725	0.389986	0.0774864
Q80YC5	Coagulation factor XII;Coagulation factor XIIa heavy chain;Coagulation factor XIIa light chain	F12	15	430510000	429940000	307240000	343210000	406320000	367330000	303550000	283950000	333490000	239940000	313060000	232360000	366060000	336700000	329590000	305270000	377725000	279712500	1.3504	0.433392	0.014154	0.0649368	340287500	334405000	1.01759	0.0251577	-0.20063	0.929812	334405000	279712500	1.19553	0.257652	0.1966	0.151991	340287500	377725000	0.900887	-0.150582	-0.0258404	0.434729	340287500	279712500	1.21656	0.282809	0.0230544	0.19016
Q00898	Alpha-1-antitrypsin 1-5	Serpina1e	14	3946200000	2535800000	3685000000	3479900000	11806000000	4602800000	15393000000	10722000000	20052000000	19160000000	12616000000	19539000000	10892000000	11027000000	9310200000	8277500000	3411725000	17841750000	0.191221	-2.38668	-3.72456	3.46184e-06	10630950000	9876675000	1.07637	0.106173	-0.0294656	0.97507	9876675000	17841750000	0.553571	-0.85316	-1.62262	0.00280368	10630950000	3411725000	3.116	1.6397	2.92578	0.00288273	10630950000	17841750000	0.595847	-0.746987	-1.57188	0.0501333
Q3UEL9	Thyroxine-binding globulin	Serpina7	14	159560000	166530000	122590000	179830000	59812000	92315000	49480000	55691000	55023000	36498000	45580000	33510000	93140000	98267000	81234000	66496000	157127500	42652750	3.68388	1.88123	1.93362	1.62871e-05	64324500	84784250	0.758685	-0.398428	-1.09556	0.0937013	84784250	42652750	1.98778	0.991158	1.39789	0.00133101	64324500	157127500	0.409378	-1.2885	-1.90191	0.000382713	64324500	42652750	1.5081	0.59273	0.503054	0.0503844
P08226	Apolipoprotein E	Apoe	14	2317700000	1961100000	1043300000	1621200000	1269300000	912430000	905270000	944050000	1094400000	828900000	791640000	640810000	809310000	986360000	1346000000	1045300000	1735825000	838937500	2.06908	1.04899	0.830279	0.00643854	1007762500	1046742500	0.962761	-0.0547509	-0.369456	0.81618	1046742500	838937500	1.2477	0.319271	0.297517	0.185317	1007762500	1735825000	0.580567	-0.784466	-1.07092	0.0216219	1007762500	838937500	1.20124	0.26452	-0.00527129	0.228957
Q03734	Serine protease inhibitor A3M	Serpina3m	14	466900000	567040000	344660000	532090000	365930000	364880000	357180000	303290000	451420000	187840000	359680000	263740000	379320000	327190000	364430000	299320000	477672500	315670000	1.5132	0.597605	0.23186	0.0610176	347820000	342565000	1.01534	0.0219631	-0.20738	0.854138	342565000	315670000	1.0852	0.117961	-0.0321774	0.507681	347820000	477672500	0.728156	-0.457681	-0.532151	0.0447769	347820000	315670000	1.10185	0.139924	-0.198245	0.460536
Q08761	Vitamin K-dependent protein S	Pros1	14	34467000	34837000	29584000	32955000	32328000	34682000	25503000	24155000	28139000	23094000	26988000	20385000	28135000	28146000	28965000	25235000	32960750	24651500	1.33707	0.419074	-0.00482797	0.0367448	29167000	27620250	1.056	0.0786106	-0.0876981	0.67831	27620250	24651500	1.12043	0.164051	0.0433066	0.301668	29167000	32960750	0.884901	-0.176412	-0.068426	0.271756	29167000	24651500	1.18317	0.242662	-0.039126	0.251717
Q9JHH6	Carboxypeptidase B2	Cpb2	14	139700000	164960000	100890000	154800000	137030000	104870000	135820000	107430000	193440000	107120000	108150000	106880000	123670000	100990000	109810000	108440000	140087500	128897500	1.08681	0.120104	-0.401187	0.589913	121287500	110727500	1.09537	0.131417	0.0238687	0.397978	110727500	128897500	0.859035	-0.219211	-0.584376	0.464129	121287500	140087500	0.865798	-0.207897	-0.120336	0.349177	121287500	128897500	0.940961	-0.0877934	-0.550929	0.846441
P22599	Alpha-1-antitrypsin 1-2	Serpina1b	14	7823700000	7398900000	6262900000	6913700000	6817800000	6918600000	5777600000	5946800000	5051700000	4129800000	6209500000	4395300000	6363900000	6485200000	6646900000	6306000000	7099800000	4946575000	1.4353	0.521348	0.130763	0.0200233	6365200000	6450500000	0.986776	-0.0192051	-0.294357	0.832537	6450500000	4946575000	1.30403	0.382981	0.401857	0.0413823	6365200000	7099800000	0.896532	-0.157573	-0.0373655	0.282416	6365200000	4946575000	1.28679	0.363776	0.148454	0.0691198
Q62009-5	Periostin	Postn	14	15565000	16868000	10571000	11210000	18065000	16871000	17675000	15906000	12847000	9483600	11937000	8610300	13918000	16627000	14312000	14553000	13553500	10719475	1.26438	0.338431	-0.11174	0.188038	17129250	14852500	1.15329	0.205756	0.180928	0.0923412	14852500	10719475	1.38556	0.470472	0.545144	0.0234299	17129250	13553500	1.26382	0.337797	0.779345	0.0828086	17129250	10719475	1.59796	0.676228	0.632374	0.00427006
Q00897	Alpha-1-antitrypsin 1-4	Serpina1d	14	13045000000	11545000000	9408500000	10149000000	12998000000	13105000000	10635000000	10871000000	8014800000	7801000000	9880600000	6507200000	10983000000	11341000000	10525000000	9303700000	11036875000	8050900000	1.37089	0.45511	0.0429469	0.0443621	11902250000	10538175000	1.12944	0.175609	0.117235	0.209856	10538175000	8050900000	1.30894	0.388403	0.410737	0.0454122	11902250000	11036875000	1.07841	0.108903	0.40197	0.490961	11902250000	8050900000	1.47838	0.564012	0.458577	0.0128062
P35917	Vascular endothelial growth factor receptor 3	Flt4	14	30941000	32257000	20208000	23067000	25745000	29414000	20658000	20028000	17155000	12724000	21600000	13946000	29287000	30084000	24236000	23075000	26618250	16356250	1.62741	0.702574	0.371022	0.0182035	23961250	26670500	0.898418	-0.154542	-0.580289	0.361954	26670500	16356250	1.6306	0.705403	0.9299	0.00726638	23961250	26618250	0.900181	-0.151713	-0.0277042	0.518965	23961250	16356250	1.46496	0.550861	0.438209	0.0357761
Q07456	Protein AMBP;Alpha-1-microglobulin;Inter-alpha-trypsin inhibitor light chain;Trypstatin	Ambp	13	955270000	884830000	657710000	739470000	728200000	597330000	603550000	447950000	1315600000	1098000000	719980000	699310000	795020000	766440000	564470000	553310000	809320000	958222500	0.844606	-0.24365	-0.883434	0.445098	594257500	669810000	0.887203	-0.172664	-0.618576	0.405547	669810000	958222500	0.699013	-0.516609	-1.07144	0.0944638	594257500	809320000	0.734268	-0.445622	-0.51227	0.0500882	594257500	958222500	0.620167	-0.689272	-1.48249	0.0360001
E9Q9C6	Fc fragment of IgG-binding protein	Fcgbp	13	6217500	11548000	4220900	530790	8095600	7056900	6626500	4276500	1867100	11589000	3844600	1902400	1864800	396690	1070900	4408100	5.6293e+06	4800775	1.17258	0.229688	-0.255907	0.995285	6513875	1.93512e+06	3.36613	1.75109	3.44582	0.0109495	1.93512e+06	4800775	0.403085	-1.31084	-2.37219	0.129018	6513875	5.6293e+06	1.15714	0.210561	0.569573	0.358345	6513875	4800775	1.35684	0.440249	0.266894	0.176493
Q00519	Xanthine dehydrogenase/oxidase;Xanthine dehydrogenase;Xanthine oxidase	Xdh	13	8981200	9163700	8177800	8080600	8453500	10258000	7993400	7804200	10201000	8227000	9242800	6805500	7367500	8891100	7398700	7429300	8600825	8619075	0.997883	-0.003058	-0.564469	0.953824	8627275	7771650	1.1101	0.150684	0.0645743	0.299675	7771650	8619075	0.90168	-0.149312	-0.469901	0.446023	8627275	8600825	1.00308	0.00442989	0.229726	0.989251	8627275	8619075	1.00095	0.0013719	-0.412832	0.9632
Q3U3V1	Coagulation factor X;Factor X light chain;Factor X heavy chain;Activated factor Xa heavy chain	F10	13	260830000	246190000	190100000	237650000	235010000	226550000	192580000	187790000	174560000	142260000	201240000	130150000	227100000	190840000	219730000	208950000	233692500	162052500	1.44208	0.52815	0.13978	0.0270649	210482500	211655000	0.99446	-0.00801428	-0.270714	0.926141	211655000	162052500	1.30609	0.385253	0.405579	0.0526145	210482500	233692500	0.900681	-0.150911	-0.0263829	0.369155	210482500	162052500	1.29885	0.377239	0.169305	0.0737107
Q9JJN5	Carboxypeptidase N catalytic chain	Cpn1	13	506990000	466000000	347920000	424150000	430040000	379840000	400990000	326230000	331970000	281880000	401620000	285320000	451840000	389570000	385450000	325850000	436265000	325197500	1.34154	0.423889	0.00155542	0.062348	384275000	388177500	0.989947	-0.0145774	-0.28458	0.933939	388177500	325197500	1.19367	0.2554	0.192913	0.182258	384275000	436265000	0.880829	-0.183066	-0.0793957	0.315762	384275000	325197500	1.18167	0.240823	-0.0419736	0.204747
P29699	Alpha-2-HS-glycoprotein	Ahsg	13	4222700000	4433600000	2944100000	3650800000	4854100000	4369200000	4219700000	3826600000	5004800000	4565100000	4060400000	3542300000	4169800000	4420500000	4028900000	3842600000	3812800000	4293150000	0.888112	-0.171186	-0.787364	0.402727	4317400000	4115450000	1.04907	0.0691126	-0.107765	0.582869	4115450000	4293150000	0.958608	-0.0609864	-0.325246	0.755421	4317400000	3812800000	1.13234	0.179312	0.518053	0.289294	4317400000	4293150000	1.00565	0.00812618	-0.402371	0.932717
P29788	Vitronectin	Vtn	13	1247400000	1193400000	933660000	1209000000	1236400000	1110100000	1003200000	855820000	1399500000	970730000	1063200000	948080000	1115600000	1220500000	1003300000	975970000	1145865000	1095377500	1.04609	0.0650089	-0.474229	0.714413	1051380000	1078842500	0.974544	-0.0372001	-0.332376	0.771522	1078842500	1095377500	0.984905	-0.0219439	-0.261305	0.957704	1051380000	1145865000	0.917543	-0.124153	0.0177332	0.467424	1051380000	1095377500	0.959833	-0.059144	-0.506557	0.78892
E9Q589	Neural cell adhesion molecule 1	Ncam1	13	12238000	11219000	8650800	9277200	11153000	11967000	8132900	9388700	8679700	9263000	9440900	6781300	9612300	13993000	11013000	9606500	10346250	8541225	1.21133	0.276593	-0.193722	0.19387	10160400	11056200	0.918978	-0.121898	-0.511322	0.523998	11056200	8541225	1.29445	0.372341	0.384431	0.0865918	10160400	10346250	0.982037	-0.0261508	0.179308	0.88167	10160400	8541225	1.18957	0.250442	-0.0270753	0.23671
Q3V1J8	Hyaluronan-binding protein 2;Hyaluronan-binding protein 2 50 kDa heavy chain;Hyaluronan-binding protein 2 50 kDa heavy chain alternate form;Hyaluronan-binding protein 2 27 kDa light chain;Hyaluronan-binding protein 2 27 kDa light chain alternate form	Habp2	13	22458000	20503000	15992000	19352000	18483000	19959000	17587000	17119000	18059000	16223000	20217000	15993000	20245000	18014000	19323000	18558000	19576250	17623000	1.11084	0.151645	-0.359372	0.431166	18287000	19035000	0.960704	-0.0578362	-0.375975	0.586443	19035000	17623000	1.08012	0.111195	-0.0432576	0.441935	18287000	19576250	0.934142	-0.098286	0.0603797	0.556928	18287000	17623000	1.03768	0.0533589	-0.332315	0.716788
Q8CFX1	GDH/6PGL endoplasmic bifunctional protein;Glucose 1-dehydrogenase;6-phosphogluconolactonase	H6pd	12	12006000	13622000	9524000	13271000	6978500	9084200	6778200	6467300	7418500	5809800	8524800	5140100	9009100	8990000	7443300	6248900	12105750	6723300	1.80057	0.848451	0.564419	0.00391202	7327050	7922825	0.924803	-0.112782	-0.492062	0.541443	7922825	6723300	1.17841	0.236845	0.162525	0.279408	7327050	12105750	0.605254	-0.724388	-0.971869	0.00335191	7327050	6723300	1.0898	0.124063	-0.22281	0.532374
P10605	Cathepsin B;Cathepsin B light chain;Cathepsin B heavy chain	Ctsb	12	123400000	110900000	74392000	99068000	85486000	77541000	76848000	69407000	73182000	55230000	77481000	50866000	82150000	74991000	67141000	65023000	101940000	64189750	1.5881	0.667305	0.324265	0.0185555	77320500	72326250	1.06905	0.0963316	-0.0502582	0.450323	72326250	64189750	1.12676	0.172176	0.056614	0.344405	77320500	101940000	0.75849	-0.398797	-0.435071	0.0706208	77320500	64189750	1.20456	0.268508	0.000904622	0.16671
Q8C255	Dipeptidase 2	Dpep2	12	14692000	17212000	10231000	13169000	13410000	15736000	11976000	11831000	7520000	8505700	13249000	5241100	12178000	12526000	10940000	8618800	13826000	8628950	1.60228	0.680127	0.341263	0.0384947	13238250	11065700	1.19633	0.258618	0.29261	0.144454	11065700	8628950	1.28239	0.358838	0.362317	0.17199	13238250	13826000	0.95749	-0.0626714	0.119097	0.812833	13238250	8628950	1.53417	0.617455	0.541349	0.038871
P70375	Coagulation factor VII;Factor VII light chain;Factor VII heavy chain	F7	12	24472000	24511000	15712000	24806000	23939000	24587000	18861000	18586000	20342000	11760000	18228000	13500000	23266000	15988000	17726000	17064000	22375250	15957500	1.40218	0.487669	0.0861125	0.0782176	21493250	18511000	1.16111	0.215501	0.201515	0.227185	18511000	15957500	1.16002	0.214148	0.125353	0.324072	21493250	22375250	0.960581	-0.0580202	0.126766	0.827264	21493250	15957500	1.34691	0.429649	0.250477	0.0767413
P08607	C4b-binding protein	C4bpa	12	362390000	436220000	339830000	345600000	328190000	315220000	453400000	376760000	428310000	277450000	376900000	388990000	390970000	311320000	297320000	314210000	371010000	367912500	1.00842	0.0120954	-0.544379	0.908568	368392500	328455000	1.12159	0.165548	0.095978	0.341948	328455000	367912500	0.892753	-0.163667	-0.49341	0.427583	368392500	371010000	0.992945	-0.0102144	0.205583	0.916849	368392500	367912500	1.0013	0.001881	-0.412043	0.980282
P09581	Macrophage colony-stimulating factor 1 receptor	Csf1r	12	203990000	244120000	150900000	198990000	179970000	235480000	196010000	166560000	120250000	121260000	182080000	115610000	193860000	169040000	184200000	136450000	199500000	134800000	1.47997	0.565568	0.189387	0.0333308	194505000	170887500	1.1382	0.18676	0.140794	0.283443	170887500	134800000	1.26771	0.342226	0.335112	0.116061	194505000	199500000	0.974962	-0.0365815	0.162111	0.885664	194505000	134800000	1.44292	0.528987	0.40433	0.0292647
P11680	Properdin	Cfp	12	89944000	101850000	70117000	84644000	100600000	79156000	97082000	78731000	62909000	91649000	89790000	62351000	108720000	103210000	74205000	101750000	86638750	76674750	1.12995	0.176261	-0.326737	0.401689	88892250	96971250	0.916687	-0.125499	-0.51893	0.487469	96971250	76674750	1.26471	0.338806	0.329509	0.13248	88892250	86638750	1.02601	0.0370452	0.283499	0.813035	88892250	76674750	1.15934	0.213306	-0.0845912	0.289194
Q9Z1T2	Thrombospondin-4	Thbs4	12	16612000	15595000	10959000	13972000	18962000	15689000	14831000	13494000	16819000	12056000	10255000	11158000	16560000	14098000	15275000	16089000	14284500	12572000	1.13622	0.184236	-0.316163	0.407099	15744000	15505500	1.01538	0.0220221	-0.207255	0.923637	15505500	12572000	1.23334	0.302566	0.270158	0.115933	15744000	14284500	1.10217	0.140352	0.453819	0.441434	15744000	12572000	1.25231	0.324588	0.0877603	0.136704
Q91ZX7	Prolow-density lipoprotein receptor-related protein 1;Low-density lipoprotein receptor-related protein 1 85 kDa subunit;Low-density lipoprotein receptor-related protein 1 515 kDa subunit;Low-density lipoprotein receptor-related protein 1 intracellular domain	Lrp1	12	24720000	27858000	17810000	18261000	24784000	20777000	18530000	18692000	15698000	14213000	17350000	12885000	22181000	22548000	19725000	15953000	22162250	15036500	1.4739	0.559636	0.181522	0.0305395	20695750	20101750	1.02955	0.0420134	-0.165019	0.784534	20101750	15036500	1.33686	0.418852	0.460605	0.0448392	20695750	22162250	0.933829	-0.0987698	0.059582	0.68445	20695750	15036500	1.37637	0.460866	0.298825	0.0286519
D3Z5G7	Carboxylic ester hydrolase	Ces1b	12	473720000	405990000	298330000	342470000	385240000	423330000	293010000	303990000	236720000	264810000	340360000	216220000	375230000	424930000	334800000	265150000	380127500	264527500	1.43701	0.523066	0.133039	0.0433158	351392500	350027500	1.0039	0.00561513	-0.241919	0.962387	350027500	264527500	1.32322	0.404051	0.436364	0.0903823	351392500	380127500	0.924407	-0.1134	0.0354614	0.600245	351392500	264527500	1.32838	0.409666	0.219527	0.0820874
P05064	Fructose-bisphosphate aldolase A;Fructose-bisphosphate aldolase	Aldoa	12	19101000	13001000	11047000	11156000	12275000	15510000	11383000	13444000	18086000	23156000	13118000	11168000	13641000	16872000	10434000	9155000	13576250	16382000	0.82873	-0.271026	-0.919728	0.406251	13153000	12525500	1.0501	0.0705237	-0.104784	0.644925	12525500	16382000	0.764589	-0.387243	-0.85957	0.232543	13153000	13576250	0.968824	-0.0456931	0.147089	0.934666	13153000	16382000	0.802893	-0.31672	-0.905487	0.3177
P97333	Neuropilin-1	Nrp1	12	3684700	2668100	2882200	5871100	6694400	4473200	5495700	3741800	12413000	4609500	6283400	6891900	5058900	5111200	1686100	2756600	3776525	7549450	0.500238	-0.999312	-1.88525	0.0245837	5101275	3653200	1.39639	0.481697	0.763919	0.16436	3653200	7549450	0.483903	-1.04721	-1.94043	0.033664	5101275	3776525	1.35079	0.433799	0.937623	0.144298	5101275	7549450	0.675715	-0.565514	-1.29081	0.159268
Q8VCG4	Complement component C8 gamma chain	C8g	11	294140000	236560000	222800000	238960000	453160000	308150000	410620000	316070000	544010000	382030000	425640000	453690000	450570000	434450000	404450000	396210000	248115000	451342500	0.549727	-0.863214	-1.70482	0.00125687	372000000	421420000	0.88273	-0.179956	-0.633983	0.238547	421420000	451342500	0.933703	-0.0989639	-0.387443	0.588117	372000000	248115000	1.4993	0.584294	1.18574	0.0121415	372000000	451342500	0.824208	-0.27892	-0.846943	0.184333
Q64727	Vinculin	Vcl	11	7126100	7424100	6218000	7080400	6393800	6323700	6059100	4985700	5074100	6367700	5387400	4836900	5635100	5483700	4711200	4917300	6962150	5416525	1.28535	0.362165	-0.0802742	0.055069	5940575	5186825	1.14532	0.195751	0.159789	0.169988	5186825	5416525	0.957593	-0.0625159	-0.327751	0.712077	5940575	6962150	0.853267	-0.22893	-0.155012	0.131762	5940575	5416525	1.09675	0.133235	-0.208604	0.442251
Q08879	Fibulin-1	Fbln1	11	18042000	15925000	12117000	14737000	24628000	14847000	20973000	15409000	19759000	13798000	14936000	13212000	20291000	19502000	17702000	19020000	15205250	15426250	0.985674	-0.0208179	-0.588014	0.935331	18964250	19128750	0.9914	-0.0124603	-0.280107	0.818252	19128750	15426250	1.24001	0.310355	0.282915	0.0883018	18964250	15205250	1.24722	0.318713	0.747882	0.196622	18964250	15426250	1.22935	0.297895	0.0464186	0.247112
H7BWY6	Retinol-binding protein 4	Rbp4	11	1002800000	1144400000	763980000	711520000	705110000	748440000	678710000	617260000	525630000	206200000	783880000	431010000	746380000	601950000	678680000	666070000	905675000	486680000	1.86093	0.89602	0.627484	0.0288034	687380000	673270000	1.02096	0.0299227	-0.190563	0.800178	673270000	486680000	1.38339	0.468212	0.541443	0.129006	687380000	905675000	0.75897	-0.397886	-0.433567	0.0759005	687380000	486680000	1.41239	0.498134	0.356546	0.116891
P16294	Coagulation factor IX;Coagulation factor IXa light chain;Coagulation factor IXa heavy chain	F9	11	48433000	50327000	39973000	45966000	42958000	35055000	40597000	33391000	45253000	27415000	41414000	32892000	40970000	34714000	39733000	35155000	46174750	36743500	1.25668	0.329615	-0.123428	0.1235	38000250	37643000	1.00949	0.0136273	-0.224991	0.940972	37643000	36743500	1.02448	0.0348926	-0.168221	0.769573	38000250	46174750	0.822966	-0.281095	-0.241016	0.0872213	38000250	36743500	1.0342	0.0485199	-0.33981	0.74736
Q9WVJ3	Carboxypeptidase Q	Cpq	11	65040000	64021000	39880000	46988000	54557000	54740000	39464000	40497000	40395000	31386000	43314000	24675000	46375000	45108000	38949000	33987000	53982250	34942500	1.54489	0.627502	0.271496	0.0362251	47314500	41104750	1.15107	0.202977	0.175056	0.285019	41104750	34942500	1.17635	0.234322	0.158393	0.269528	47314500	53982250	0.876483	-0.190203	-0.0911626	0.435841	47314500	34942500	1.35407	0.4373	0.262326	0.0855945
A0A2I3BRQ1	Expressed sequence AI182371	AI182371	11	59466000	67962000	51399000	68284000	54149000	47813000	54583000	51731000	47923000	22757000	44671000	33342000	58279000	48170000	48963000	51475000	61777750	37173250	1.66189	0.732823	0.411125	0.0159772	52069000	51721750	1.00671	0.00965361	-0.233386	0.918348	51721750	37173250	1.39137	0.476506	0.555027	0.061987	52069000	61777750	0.842844	-0.246663	-0.184247	0.130856	52069000	37173250	1.40071	0.48616	0.338	0.0592726
G3UXY9	Ectonucleotide pyrophosphatase/phosphodiesterase family member 2	Enpp2	11	5851900	8221200	4942300	5334900	7093100	6963300	5450700	4575900	4280400	4877700	5550800	3122400	5666200	5762500	5495900	4865700	6087575	4457825	1.36559	0.449528	0.0355464	0.100452	6020750	5447575	1.10522	0.144329	0.0511479	0.478966	5447575	4457825	1.22203	0.289274	0.24839	0.149997	6020750	6087575	0.989023	-0.0159244	0.196168	0.962883	6020750	4457825	1.3506	0.433603	0.256601	0.0990876
G3X8T3	Carboxypeptidase;Lysosomal protective protein;Lysosomal protective protein 32 kDa chain;Lysosomal protective protein 20 kDa chain	Ctsa	11	17926000	16443000	13318000	16252000	17577000	15302000	14347000	13842000	17163000	11371000	18830000	13600000	15578000	16971000	14649000	14563000	15984750	15241000	1.0488	0.0687386	-0.469285	0.687099	15267000	15440250	0.988779	-0.0162795	-0.288176	0.874268	15440250	15241000	1.01307	0.0187385	-0.194677	0.825258	15267000	15984750	0.955098	-0.0662796	0.113148	0.678356	15267000	15241000	1.00171	0.00245903	-0.411148	0.908468
A2AFG7	Neural cell adhesion molecule L1	L1cam	11	77584000	83933000	54799000	74206000	73813000	100370000	69927000	63440000	55720000	63263000	62005000	51668000	64178000	88182000	77191000	69303000	72630500	58164000	1.24872	0.320449	-0.13558	0.140897	76887500	74713500	1.0291	0.0413801	-0.166357	0.87117	74713500	58164000	1.28453	0.361242	0.366255	0.0562098	76887500	72630500	1.05861	0.0821736	0.357902	0.708471	76887500	58164000	1.32191	0.402623	0.208619	0.0732185
Q3TQP6	Malic enzyme;NADP-dependent malic enzyme	Me1	10	16345000	23203000	14769000	14760000	8154500	10423000	5690700	5497800	6372500	9482200	7877100	5083600	8578900	8163400	7259400	5521600	17269250	7203850	2.39723	1.26137	1.11184	0.000772623	7441500	7380825	1.00822	0.0118114	-0.228828	0.938851	7380825	7203850	1.02457	0.0350139	-0.168022	0.827431	7441500	17269250	0.43091	-1.21454	-1.77998	0.00126903	7441500	7203850	1.03299	0.0468253	-0.342434	0.906792
Q6GQT1	Alpha-2-macroglobulin-P	A2mp	10	3034900	4570400	2976500	3232100	6083700	4227700	4722000	4302700	2956800	3454100	2982700	2839700	5394200	5385900	4963900	4026200	3453475	3058325	1.1292	0.175307	-0.328001	0.439974	4834025	4942550	0.978043	-0.0320306	-0.321454	0.822299	4942550	3058325	1.6161	0.692514	0.908792	0.00224977	4834025	3453475	1.39976	0.485176	1.02233	0.0357306	4834025	3058325	1.58061	0.660483	0.607989	0.00555762
P70274	Selenoprotein P	Sepp1	10	286240000	313890000	223930000	245960000	244280000	223010000	193450000	166980000	221860000	146530000	212300000	153500000	220350000	206510000	191720000	206750000	267505000	183547500	1.45742	0.543412	0.160014	0.028971	206930000	206332500	1.0029	0.00417174	-0.244968	0.951775	206332500	183547500	1.12414	0.168818	0.0511132	0.325516	206930000	267505000	0.773556	-0.370423	-0.38829	0.0680711	206930000	183547500	1.12739	0.172989	-0.147033	0.412451
E9PZ00	Prosaposin	Psap	10	23786000	26490000	14803000	18600000	15955000	17886000	17714000	12166000	15652000	8059300	13411000	11348000	20277000	13271000	11806000	12614000	20919750	12117575	1.7264	0.787765	0.483964	0.0179541	15930250	14492000	1.09924	0.136512	0.0346329	0.486595	14492000	12117575	1.19595	0.258156	0.197426	0.336348	15930250	20919750	0.761493	-0.393097	-0.425672	0.134262	15930250	12117575	1.31464	0.394668	0.196299	0.122802
P24270	Catalase	Cat	10	15835000	10212000	4952000	3590100	3538000	19396000	4103700	20891000	697888	475176	1199200	3616300	4002300	9266800	1964500	727810	8647275	1.49714e+06	5.77586	2.53004	2.79378	0.00339352	11982175	3.99035e+06	3.00279	1.5863	3.09766	0.102632	3.99035e+06	1.49714e+06	2.66531	1.41431	2.0909	0.166502	11982175	8647275	1.38566	0.470572	0.998251	0.735945	11982175	1.49714e+06	8.00337	3.00061	4.23234	0.00568141
A0A1B0GSX0	L-lactate dehydrogenase A chain;L-lactate dehydrogenase	Ldha	10	7800200	5812100	5609700	4219300	3551300	8016000	4677700	6761500	2570500	2424000	4336900	5913700	4503800	6189000	4168300	3152300	5860325	3811275	1.53763	0.620707	0.262487	0.0693379	5751625	4503350	1.27719	0.352971	0.491954	0.317383	4503350	3811275	1.18159	0.240725	0.168879	0.396679	5751625	5860325	0.981452	-0.0270111	0.17789	0.83646	5751625	3811275	1.50911	0.593696	0.50455	0.128509
Q91VB8	Hemoglobin subunit alpha	Hba-a1	10	8638700000	4938200000	3464400000	1920400000	3016200000	8418500000	3258100000	9154700000	572600000	471600000	1675500000	3118600000	3402300000	5224300000	2039800000	873940000	4740425000	1459575000	3.24781	1.69947	1.69265	0.0205555	5961875000	2885085000	2.06645	1.04715	1.95858	0.10363	2885085000	1459575000	1.97666	0.983065	1.38464	0.161077	5961875000	4740425000	1.25767	0.33075	0.767727	0.538283	5961875000	1459575000	4.08467	2.03022	2.72941	0.0092421
P00920	Carbonic anhydrase 2	Ca2	10	182820000	120870000	81851000	75220000	97821000	179520000	81037000	158750000	40566000	49660000	53185000	68058000	98671000	122540000	69295000	49262000	115190250	52867250	2.17886	1.12357	0.929161	0.00853333	129282000	84942000	1.522	0.605971	1.02648	0.12834	84942000	52867250	1.6067	0.684104	0.895018	0.0715493	129282000	115190250	1.12233	0.166503	0.496935	0.628161	129282000	52867250	2.44541	1.29008	1.58309	0.0029274
P63017	Heat shock cognate 71 kDa protein	Hspa8	10	10119000	10830000	6611900	6466600	7387000	11321000	8207800	10112000	5534100	5422200	8064200	6847600	7865500	8338600	8763300	4618700	8506875	6467025	1.31542	0.395527	-0.0360448	0.161963	9256950	7396525	1.25153	0.323689	0.43009	0.189866	7396525	6467025	1.14373	0.193745	0.0919385	0.511349	9256950	8506875	1.08817	0.121908	0.423411	0.56315	9256950	6467025	1.43141	0.517435	0.386438	0.0392549
Q60963	Platelet-activating factor acetylhydrolase	Pla2g7	10	29466000	26454000	14837000	22964000	30388000	26601000	24131000	19818000	29409000	21698000	18083000	15943000	22435000	20847000	20491000	17318000	23430250	21283250	1.10088	0.138654	-0.376594	0.648596	25234500	20272750	1.24475	0.315856	0.413539	0.0943393	20272750	21283250	0.952521	-0.0701767	-0.340297	0.866822	25234500	23430250	1.07701	0.107025	0.398874	0.593813	25234500	21283250	1.18565	0.245679	-0.0344526	0.289015
E9QPU1	von Willebrand factor;von Willebrand antigen 2	Vwf	10	3227500	1143000	17592000	4949300	2403600	29457000	591593	975050	3150300	4880900	274980	2549400	13990000	5289700	1099100	601777	6727950	2713895	2.47908	1.3098	1.17606	0.271664	NA	NA	NA	NA	NA	NA	5.24514e+06	2713895	1.9327	0.950618	1.3315	0.656358	8.35681e+06	6727950	1.2421	0.312785	0.738109	0.581123	8.35681e+06	2713895	3.07927	1.62259	2.09808	0.727139
O35930	Platelet glycoprotein Ib alpha chain	Gp1ba	10	60447000	60554000	44464000	48358000	56599000	53941000	44779000	42421000	31063000	30261000	66472000	40007000	59272000	59291000	40277000	44773000	53455750	41950750	1.27425	0.349649	-0.0968683	0.172821	49435000	50903250	0.971156	-0.0422249	-0.342992	0.86122	50903250	41950750	1.21341	0.279061	0.231664	0.266306	49435000	53455750	0.924784	-0.112812	0.0364303	0.535585	49435000	41950750	1.17841	0.236836	-0.0481481	0.297664
Q3KQQ2	Major urinary protein 3	Mup3	10	155910000	113890000	125000000	122220000	194540000	157450000	164670000	144130000	153820000	40732000	160700000	101640000	182710000	141480000	113440000	109400000	129255000	114223000	1.1316	0.178367	-0.323945	0.422325	165197500	136757500	1.20796	0.272572	0.322092	0.162724	136757500	114223000	1.19729	0.259767	0.200064	0.367245	165197500	129255000	1.27807	0.353972	0.806013	0.0545832	165197500	114223000	1.44627	0.532339	0.409521	0.128588
Q9QZU3	Platelet glycoprotein V	Gp5	10	13590000	12331000	37278000	19164000	3765200	71508000	10290000	18899000	3456700	2935400	27897000	26629000	35901000	39682000	11259000	4165200	20590750	15229525	1.35203	0.435125	0.0164527	0.255831	26115550	22751800	1.14785	0.198928	0.166502	0.934356	22751800	15229525	1.49393	0.57911	0.723065	0.455297	26115550	20590750	1.26831	0.342913	0.78778	0.729707	26115550	15229525	1.7148	0.778038	0.790057	0.534744
Q9Z0K8	Pantetheinase	Vnn1	9	29882000	31453000	17496000	15473000	4929300	11294000	1051700	2781600	1520000	475176	4241400	867050	7286400	3233500	6538500	6824900	23576000	1.77591e+06	13.2755	3.73069	4.38555	0.000111759	5014150	5970825	0.839775	-0.251925	-0.786035	0.352714	5970825	1.77591e+06	3.36213	1.74937	2.63966	0.00807078	5014150	23576000	0.21268	-2.23324	-3.4595	0.00409794	5014150	1.77591e+06	2.82343	1.49745	1.90427	0.116185
P03953-2	Complement factor D	Cfd	9	293380000	292050000	211530000	290510000	429400000	365960000	297870000	298820000	325680000	533280000	413980000	293170000	441520000	528230000	436030000	400470000	271867500	391527500	0.694377	-0.52621	-1.25804	0.0636563	348012500	451562500	0.770685	-0.375787	-1.04772	0.0439764	451562500	391527500	1.15334	0.205812	0.1117	0.302967	348012500	271867500	1.28008	0.356235	0.809745	0.0917457	348012500	391527500	0.888858	-0.169975	-0.67821	0.547404
Q9CQF9	Prenylcysteine oxidase	Pcyox1	9	20190000	23971000	16243000	19951000	17814000	16930000	12569000	12320000	11573000	7924600	15351000	6988600	15668000	11865000	15050000	13574000	20088750	10459300	1.92066	0.941601	0.687913	0.00603064	14908250	14039250	1.0619	0.0866451	-0.0707234	0.673786	14039250	10459300	1.34227	0.42468	0.470149	0.0992843	14908250	20088750	0.742119	-0.430277	-0.486971	0.0503164	14908250	10459300	1.42536	0.511325	0.376975	0.0806878
P07309	Transthyretin	Ttr	9	12596000000	11407000000	7093900000	8535200000	4255300000	7615400000	7105300000	6716500000	3980800000	2502000000	6281100000	4138800000	7253500000	6880600000	7745800000	6764800000	9908025000	4225675000	2.34472	1.22942	1.06948	0.003064	6423125000	7161175000	0.896937	-0.156921	-0.585315	0.35531	7161175000	4225675000	1.69468	0.761015	1.02098	0.0124858	6423125000	9908025000	0.648275	-0.625322	-0.80854	0.0408151	6423125000	4225675000	1.52002	0.604094	0.520654	0.0704033
P13634	Carbonic anhydrase 1	Ca1	9	41842000	21091000	14935000	7904700	12292000	38787000	13159000	40105000	930290	1500200	5471700	9208000	12384000	23731000	6205100	2502600	21443175	4.27755e+06	5.01296	2.32566	2.52283	0.00900725	26085750	11205675	2.32791	1.21903	2.32172	0.0878408	11205675	4.27755e+06	2.61965	1.38937	2.05007	0.126996	26085750	21443175	1.21651	0.282743	0.688579	0.612456	26085750	4.27755e+06	6.0983	2.60841	3.6249	0.00508145
Q3UXJ2	Transforming growth factor-beta-induced protein ig-h3	Tgfbi	9	7221700	7671500	5184400	5420600	6457700	5505000	5392600	5078000	3936700	4751200	6340600	4666100	6134700	4872100	4928000	5165500	6374550	4923650	1.29468	0.372595	-0.0664466	0.126074	5608325	5275075	1.06317	0.0883783	-0.0670614	0.511385	5275075	4923650	1.07137	0.0994634	-0.062471	0.550882	5608325	6374550	0.879799	-0.184754	-0.0821785	0.36464	5608325	4923650	1.13906	0.187842	-0.12403	0.312183
P70663	SPARC-like protein 1	Sparcl1	9	19924000	16022000	10965000	14151000	15230000	15049000	13707000	12233000	13041000	16927000	16143000	9221000	14139000	13964000	9407600	12130000	15265500	13833000	1.10356	0.142161	-0.371945	0.591151	14054750	12410150	1.13252	0.179537	0.125534	0.270599	12410150	13833000	0.897141	-0.156594	-0.481826	0.584115	14054750	15265500	0.920687	-0.119217	0.0258709	0.658627	14054750	13833000	1.01603	0.0229437	-0.379421	0.806371
Q63880	Carboxylesterase 3A	Ces3a	9	11409000	11700000	8411500	9764500	8930400	10050000	11243000	7480100	9877000	5775500	8563300	6414200	9189100	11177000	7342800	8663000	10321250	7657500	1.34786	0.430672	0.010549	0.0781749	9425875	9092975	1.03661	0.0518742	-0.144185	0.778884	9092975	7657500	1.18746	0.247879	0.180595	0.266746	9425875	10321250	0.913249	-0.130919	0.00657756	0.47712	9425875	7657500	1.23093	0.299753	0.0492965	0.200133
Q60590	Alpha-1-acid glycoprotein 1	Orm1	9	1249100000	1275700000	976800000	1456700000	1283000000	1120400000	1643900000	1790700000	3010100000	1127700000	1237300000	1859200000	1400200000	933560000	1120700000	896410000	1239575000	1808575000	0.685388	-0.545008	-1.28296	0.199776	1459500000	1087717500	1.3418	0.42417	0.64238	0.0780389	1087717500	1808575000	0.601422	-0.73355	-1.42673	0.081373	1459500000	1239575000	1.17742	0.235629	0.610902	0.29711	1459500000	1808575000	0.806989	-0.309379	-0.894118	0.524023
Q9Z2U0	Proteasome subunit alpha type-7	Psma7	9	22161000	18322000	16549000	17042000	17467000	21745000	6592900	15150000	16463000	17975000	16932000	11988000	18879000	19900000	14990000	13962000	18518500	15839500	1.16913	0.22544	-0.261537	0.265942	15238725	16932750	0.899956	-0.152074	-0.575075	0.484928	16932750	15839500	1.06902	0.0962895	-0.067669	0.634415	15238725	18518500	0.822892	-0.281225	-0.24123	0.289904	15238725	15839500	0.962071	-0.0557846	-0.501355	0.65974
Q80YX1-2	Tenascin	Tnc	9	4628700	4546800	2770500	3482700	4028200	4904500	5685500	4168800	10548000	3827300	4700100	4817900	5317100	4802900	4421100	2888800	3857175	5973325	0.645733	-0.63099	-1.39695	0.144134	4696750	4357475	1.07786	0.10817	-0.0252459	0.563564	4357475	5973325	0.729489	-0.455042	-0.970607	0.305769	4696750	3857175	1.21767	0.284118	0.690846	0.191071	4696750	5973325	0.786287	-0.346871	-0.952185	0.469896
P33434	72 kDa type IV collagenase;PEX	Mmp2	9	12644000	11606000	7320900	9703600	11277000	7603100	10743000	10403000	8454200	9338600	10242000	6145800	9100200	10621000	11271000	10623000	10318625	8545150	1.20754	0.272073	-0.199714	0.301718	10006525	10403800	0.961814	-0.0561695	-0.372454	0.672654	10403800	8545150	1.21751	0.283933	0.239642	0.149272	10006525	10318625	0.969754	-0.0443097	0.14937	0.891622	10006525	8545150	1.17102	0.227763	-0.0622001	0.308994
P55284	Cadherin-5	Cdh5	8	13399000	14894000	11833000	15462000	11591000	13661000	11509000	10892000	7628800	6915800	11528000	7856500	11988000	10951000	11237000	9795800	13897000	8482275	1.63836	0.71225	0.383851	0.0070746	11913250	10992950	1.08372	0.115988	-0.00872844	0.371726	10992950	8482275	1.29599	0.374055	0.387239	0.0693613	11913250	13897000	0.857253	-0.222206	-0.143927	0.168049	11913250	8482275	1.40449	0.490044	0.344016	0.0318204
P39039	Mannose-binding protein A	Mbl1	8	306320000	326990000	235160000	303380000	253530000	247100000	231180000	174010000	245110000	120910000	216060000	190860000	274020000	231250000	213620000	213070000	292962500	193235000	1.51609	0.60036	0.235512	0.0320754	226455000	232990000	0.971952	-0.0410436	-0.340497	0.768344	232990000	193235000	1.20573	0.269912	0.216679	0.224721	226455000	292962500	0.772983	-0.371492	-0.390052	0.0668928	226455000	193235000	1.17192	0.228868	-0.0604893	0.331596
Q63836	Selenium-binding protein 2	Selenbp2	8	3620100	4077500	2501100	2093900	661377	5360800	3132800	4840000	697888	475176	3613900	7136900	663032	5272400	731956	601777	3073150	2.98097e+06	1.03092	0.0439382	-0.502164	0.357333	NA	NA	NA	NA	NA	NA	NA	NA	NA	NA	NA	NA	3.49874e+06	3073150	1.13849	0.187119	0.530924	0.843361	NA	NA	NA	NA	NA	NA
P31532	Serum amyloid A-4 protein	Saa4	8	694500000	808470000	642300000	970720000	708830000	528690000	579890000	331690000	596150000	235110000	559160000	616290000	770960000	487940000	655690000	673430000	778997500	501677500	1.55279	0.634858	0.281249	0.060672	537275000	647005000	0.830403	-0.268116	-0.820242	0.269242	647005000	501677500	1.28968	0.367017	0.375712	0.211467	537275000	778997500	0.689701	-0.535958	-0.661206	0.0550214	537275000	501677500	1.07096	0.0989005	-0.261781	0.705448
P09813	Apolipoprotein A-II;Proapolipoprotein A-II	Apoa2	8	8468200000	9225100000	7361400000	7579400000	7508400000	7542900000	6503700000	7039300000	4767200000	2121500000	6429700000	5104900000	7338100000	6077500000	8315300000	6735700000	8158525000	4605825000	1.77135	0.824849	0.533128	0.0211327	7148575000	7116650000	1.00449	0.0064574	-0.240139	0.920204	7116650000	4605825000	1.54514	0.627739	0.802707	0.0567993	7148575000	8158525000	0.876209	-0.190653	-0.0919044	0.197969	7148575000	4605825000	1.55207	0.634196	0.567276	0.0518189
Q923D2	Flavin reductase (NADPH)	Blvrb	8	20232000	13923000	6799300	3309100	6270700	28689000	5788000	33424000	697888	141330	3045000	5098200	7385700	12012000	3344000	461280	11065850	2.2456e+06	4.92778	2.30094	2.49005	0.0237103	18542925	5800745	3.19665	1.67656	3.28835	0.105425	5800745	2.2456e+06	2.58316	1.36913	2.01692	0.253666	18542925	11065850	1.67569	0.744755	1.45029	0.453317	18542925	2.2456e+06	8.25743	3.04569	4.30216	0.013275
Q61171	Peroxiredoxin-2	Prdx2	8	49746000	29619000	16790000	11260000	16368000	59962000	18232000	59893000	2799000	1844400	9640700	15227000	19163000	31290000	13107000	3797500	26853750	7377775	3.63982	1.86387	1.91061	0.0181919	38613750	16839375	2.29306	1.19728	2.27575	0.117567	16839375	7377775	2.28245	1.19058	1.7245	0.147078	38613750	26853750	1.43793	0.523991	1.08632	0.450604	38613750	7377775	5.23379	2.38786	3.28332	0.00863473
P14847	C-reactive protein	Crp	8	336240000	328320000	266030000	317350000	316630000	298170000	272310000	294780000	296280000	141210000	311770000	226610000	348170000	382550000	352260000	303860000	311985000	243967500	1.2788	0.354788	-0.0900551	0.158262	295472500	346710000	0.852218	-0.230706	-0.741203	0.0826478	346710000	243967500	1.42113	0.50704	0.605034	0.0590469	295472500	311985000	0.947073	-0.0784528	0.0930785	0.589543	295472500	243967500	1.21111	0.276335	0.0130267	0.2278
P00688	Pancreatic alpha-amylase;Alpha-amylase	Amy2	8	10888000	8024700	8719900	9406800	11182000	8094000	10048000	7872000	20052000	12197000	11731000	9354800	8451900	10213000	9093500	20091000	9259850	13333700	0.69447	-0.526016	-1.25778	0.0931918	9299000	11962350	0.777356	-0.363353	-1.02145	0.350863	11962350	13333700	0.897152	-0.156576	-0.481798	0.582154	9299000	9259850	1.00423	0.00608676	0.232458	0.998192	9299000	13333700	0.697406	-0.51993	-1.22022	0.10109
Q9CQW3	Vitamin K-dependent protein Z	Proz	8	202950000	192360000	144030000	199810000	199320000	200040000	170570000	142310000	195400000	100240000	163940000	155490000	217430000	125700000	163340000	171600000	184787500	153767500	1.20173	0.265117	-0.208937	0.259623	178060000	169517500	1.05039	0.0709292	-0.103927	0.679029	169517500	153767500	1.10243	0.140684	0.00503701	0.558106	178060000	184787500	0.963593	-0.0535037	0.134212	0.77107	178060000	153767500	1.15798	0.211613	-0.0872137	0.34647
P16882-2	Growth hormone receptor;Growth hormone-binding protein	Ghr	8	10977000	11396000	6097700	9319100	8765600	6982300	7832400	6993500	6421500	1514100	6453500	4328000	10546000	7856600	6662700	8352800	9447450	4679275	2.019	1.01364	0.783418	0.0343448	7643450	8354525	0.914887	-0.128334	-0.524918	0.505247	8354525	4679275	1.78543	0.836273	1.14423	0.0513993	7643450	9447450	0.809049	-0.305701	-0.281583	0.251376	7643450	4679275	1.63347	0.707939	0.681488	0.0742284
P98086	Complement C1q subcomponent subunit A	C1qa	8	55321000	50249000	63934000	54142000	107470000	64188000	36035000	78605000	63502000	74687000	38480000	39593000	56530000	54903000	56815000	61685000	55911500	54065500	1.03414	0.0484368	-0.4962	0.693858	71574500	57483250	1.24514	0.316304	0.414487	0.509683	57483250	54065500	1.06321	0.0884333	-0.0805353	0.55625	71574500	55911500	1.28014	0.356301	0.809852	0.437082	71574500	54065500	1.32385	0.404737	0.211894	0.362736
Q9ET66	Peptidase inhibitor 16	Pi16	8	52642000	58702000	37861000	53559000	57654000	57973000	54684000	47519000	40184000	49457000	62157000	33866000	44092000	59584000	45721000	45100000	50691000	46416000	1.0921	0.127107	-0.391902	0.562148	54457500	48624250	1.11997	0.163455	0.0915556	0.256922	48624250	46416000	1.04758	0.0670538	-0.11555	0.682616	54457500	50691000	1.0743	0.103401	0.392899	0.511248	54457500	46416000	1.17325	0.230509	-0.0579483	0.254474
O09164	Extracellular superoxide dismutase [Cu-Zn]	Sod3	8	77070000	76306000	55164000	66382000	72706000	70699000	48935000	46020000	30244000	39208000	55410000	30815000	81147000	80048000	58431000	50060000	68730500	38919250	1.76598	0.820467	0.527319	0.0067387	59590000	67421500	0.883843	-0.178138	-0.630142	0.463365	67421500	38919250	1.73234	0.792725	1.07291	0.0130282	59590000	68730500	0.86701	-0.20588	-0.11701	0.314133	59590000	38919250	1.53112	0.614586	0.536905	0.0421989
P46412	Glutathione peroxidase 3	Gpx3	8	1184500000	1134200000	813320000	977110000	1123600000	1143400000	868420000	809120000	912060000	1069600000	881310000	607580000	1098600000	1212000000	993790000	827600000	1027282500	867637500	1.184	0.243669	-0.237371	0.285777	986135000	1032997500	0.954634	-0.0669797	-0.395293	0.702992	1032997500	867637500	1.19059	0.251672	0.186808	0.24941	986135000	1027282500	0.959945	-0.0589759	0.12519	0.754738	986135000	867637500	1.13657	0.184693	-0.128907	0.404441
P21180	Complement C2;Complement C2b fragment;Complement C2a fragment	C2	8	35743000	44154000	33608000	37472000	44678000	38073000	41742000	37699000	51473000	34895000	42190000	35096000	40801000	41190000	33124000	36065000	37744250	40913500	0.922538	-0.11632	-0.714626	0.600265	40548000	37795000	1.07284	0.101435	-0.0394753	0.420822	37795000	40913500	0.923778	-0.114382	-0.412694	0.586062	40548000	37744250	1.07428	0.103374	0.392854	0.464829	40548000	40913500	0.991067	-0.0129462	-0.435007	0.989983
P16015	Carbonic anhydrase 3	Ca3	8	4165500	816550	2409800	478172	661377	1052400	591593	3236800	1084000	475176	425807	19021000	4602600	3984900	731956	601777	NA	NA	NA	NA	NA	NA	NA	NA	NA	NA	NA	NA	NA	NA	NA	NA	NA	NA	NA	NA	NA	NA	NA	NA	NA	NA	NA	NA	NA	NA
E9QQ18	Proteoglycan 4;Proteoglycan 4 C-terminal part	Prg4	7	11139000	17810000	12422000	32213000	5490400	5494200	5338100	4554400	11309000	5495000	5271700	6094900	5604200	2208500	4478700	4288400	18396000	7042650	2.61208	1.3852	1.27602	0.0079471	5219275	4144950	1.25919	0.332495	0.448693	0.178302	4144950	7042650	0.58855	-0.764764	-1.47785	0.057867	5219275	18396000	0.283718	-1.81747	-2.77402	0.000753687	5219275	7042650	0.741095	-0.432269	-1.08445	0.201429
P41317	Mannose-binding protein C	Mbl2	7	182690000	172390000	124650000	227340000	82545000	118430000	81949000	83969000	47583000	53142000	91953000	44480000	112620000	85426000	129900000	68650000	176767500	59289500	2.98143	1.576	1.52897	0.000390187	91723250	99149000	0.925105	-0.112311	-0.491066	0.713642	99149000	59289500	1.67229	0.741822	0.989545	0.0303459	91723250	176767500	0.518892	-0.946494	-1.33805	0.0027379	91723250	59289500	1.54704	0.629511	0.56002	0.0333176
F6WR04	Cathepsin S	Ctss	7	34389000	35784000	27393000	27416000	24446000	22185000	24198000	24920000	27633000	29858000	35469000	20905000	25417000	25073000	19196000	18225000	31245500	28466250	1.09763	0.134396	-0.382239	0.502122	23937250	21977750	1.08916	0.123214	0.00653669	0.370762	21977750	28466250	0.772063	-0.373209	-0.836585	0.121803	23937250	31245500	0.766102	-0.384391	-0.411319	0.0314485	23937250	28466250	0.840899	-0.249995	-0.802145	0.269422
P10404	MLV-related proviral Env polyprotein;Surface protein;Transmembrane protein	Env1	7	18438000	20335000	12492000	18593000	12554000	13963000	13581000	10080000	18300000	13400000	16345000	22999000	13896000	10247000	12041000	12642000	17464500	17761000	0.983306	-0.0242875	-0.592614	0.932628	12544500	12206500	1.02769	0.0394054	-0.170529	0.815581	12206500	17761000	0.687264	-0.541063	-1.11149	0.0303873	12544500	17464500	0.718286	-0.47737	-0.564613	0.0449177	12544500	17761000	0.706295	-0.501658	-1.19192	0.0492097
G3UXR2	Prolyl endopeptidase FAP;Antiplasmin-cleaving enzyme FAP, soluble form	Fap	7	7817800	6997300	4226900	5133200	8893200	7710600	6169400	7745900	8340000	5138500	7873300	3845500	9561600	8803800	7394000	7390900	6043800	6299325	0.959436	-0.0597413	-0.639617	0.920568	7629775	8287575	0.920628	-0.11931	-0.505852	0.45083	8287575	6299325	1.31563	0.395753	0.422774	0.124796	7629775	6043800	1.26241	0.336185	0.776687	0.144736	7629775	6299325	1.21121	0.276443	0.0131946	0.260065
Q8R016	Bleomycin hydrolase	Blmh	7	12715000	11363000	7219800	10802000	12524000	9786500	9579900	8536300	8484200	13483000	6791700	7183000	9211500	7593600	7061100	6303900	10524950	8985475	1.17133	0.228147	-0.257949	0.386865	10106675	7542525	1.33996	0.422189	0.638194	0.0376973	7542525	8985475	0.839413	-0.252547	-0.638973	0.417117	10106675	10524950	0.960259	-0.0585049	0.125966	0.847835	10106675	8985475	1.12478	0.169642	-0.152218	0.424871
Q9QWK4	CD5 antigen-like	Cd5l	7	5942300	8209300	6093200	5987200	7831300	3744900	5724400	5124500	7842900	5082500	5341600	3753600	6218200	5859600	4628100	4179900	6558000	5505150	1.19125	0.252474	-0.225697	0.277943	5606275	5221450	1.0737	0.102592	-0.0370316	0.775518	5221450	5505150	0.948466	-0.0763314	-0.350377	0.860636	5606275	6558000	0.854876	-0.226213	-0.150533	0.304527	5606275	5505150	1.01837	0.0262606	-0.374284	0.930149
A0A0G2JE26	Anthrax toxin receptor 2	Antxr2	7	5027600	6431600	3839600	4655300	7095100	6839700	3920000	3813800	2551800	2725600	5388400	2202100	5326900	6591600	6567400	5769800	4988525	3216975	1.55069	0.632909	0.278664	0.049096	5417150	6063925	0.893341	-0.162718	-0.597563	0.393166	6063925	3216975	1.88498	0.914547	1.27242	0.00656436	5417150	4988525	1.08592	0.118921	0.418486	0.771148	5417150	3216975	1.68393	0.751829	0.749465	0.0523366
Q02819	Nucleobindin-1	Nucb1	7	4814900	7949200	4678000	5244600	3310600	3063500	3759900	6049000	1426000	1656300	1178500	1973400	6800100	4772500	2337500	3555900	5671675	1558550	3.63907	1.86357	1.91021	4.27893e-05	4045750	4366500	0.926543	-0.11007	-0.486332	0.878138	4366500	1558550	2.80164	1.48627	2.20876	0.00251808	4045750	5671675	0.713325	-0.487368	-0.581096	0.0940805	4045750	1558550	2.59584	1.3762	1.71648	0.000840517
P99026	Proteasome subunit beta type-4	Psmb4	7	15189000	14358000	9339900	12632000	13650000	13992000	5038500	13609000	14014000	15814000	8580600	9772900	11362000	12007000	10671000	9366900	12879725	12045375	1.06927	0.0966225	-0.432318	0.663067	11572375	10851725	1.06641	0.0927606	-0.0578029	0.966539	10851725	12045375	0.900904	-0.150555	-0.471936	0.633168	11572375	12879725	0.898496	-0.154417	-0.0321626	0.514441	11572375	12045375	0.960732	-0.0577943	-0.504467	0.747181
Q61406	Complement factor H-related 1	Cfhr1	7	42073000	44376000	33357000	30810000	38459000	33081000	29915000	26032000	35557000	26232000	32403000	28576000	33072000	32024000	32357000	33311000	37654000	30692000	1.22683	0.29494	-0.169398	0.174881	31871750	32691000	0.97494	-0.0366153	-0.331141	0.720078	32691000	30692000	1.06513	0.0910308	-0.0762813	0.518067	31871750	37654000	0.846437	-0.240525	-0.174128	0.234073	31871750	30692000	1.03844	0.0544156	-0.330678	0.795298
Q61805	Lipopolysaccharide-binding protein	Lbp	7	16714000	20525000	10852000	16474000	14304000	12905000	10307000	10867000	13484000	7958000	12903000	9543900	14591000	12710000	13762000	12224000	16141250	10972225	1.4711	0.556896	0.17789	0.0656038	12095750	13321750	0.90797	-0.139283	-0.548052	0.321688	13321750	10972225	1.21413	0.279928	0.233082	0.163604	12095750	16141250	0.749369	-0.416252	-0.463848	0.112091	12095750	10972225	1.1024	0.140644	-0.197129	0.488214
Q9CZT5	Vasorin	Vasn	7	4854400	5635900	3746000	4063500	4682800	4105700	5150500	4253800	2249200	3419700	4952000	3503100	4262600	3412500	4130400	4076800	4574950	3531000	1.29565	0.373679	-0.0650097	0.156981	4548200	3970575	1.14548	0.195948	0.160205	0.163027	3970575	3531000	1.12449	0.169271	0.0518559	0.388049	4548200	4574950	0.994153	-0.00846028	0.208475	0.981243	4548200	3531000	1.28808	0.365219	0.150689	0.128441
Q91Y97	Fructose-bisphosphate aldolase B	Aldob	7	12394000	20075000	8735400	8265600	6020700	9464600	6545200	5515000	4732200	5965900	8340600	10472000	10469000	12090000	7687900	6889800	12367500	7377675	1.67634	0.745316	0.427687	0.0755488	6886375	9284175	0.741733	-0.431029	-1.16443	0.115462	9284175	7377675	1.25841	0.331607	0.317721	0.254452	6886375	12367500	0.556812	-0.844737	-1.17029	0.0370175	6886375	7377675	0.933407	-0.0994215	-0.568939	0.827855
Q9Z2U1	Proteasome subunit alpha type-5	Psma5	7	16154000	15362000	9601500	12565000	13192000	15354000	4373000	12719000	11985000	12312000	9788000	8933500	13390000	13752000	9333900	10153000	13420625	10754625	1.24789	0.319495	-0.136845	0.205519	11409500	11657225	0.978749	-0.0309888	-0.319253	0.700373	11657225	10754625	1.08393	0.116267	-0.0349508	0.59384	11409500	13420625	0.850147	-0.234216	-0.163727	0.406853	11409500	10754625	1.06089	0.0852783	-0.282879	0.902941
P47878	Insulin-like growth factor-binding protein 3	Igfbp3	7	20190000	18487000	14807000	17316000	19111000	13063000	16682000	10345000	12263000	9853400	15837000	11847000	17684000	19979000	14425000	37465000	17700000	12450100	1.42168	0.507592	0.112525	0.0300991	14800250	22388250	0.661072	-0.59712	-1.51534	0.136999	22388250	12450100	1.79824	0.846584	1.16112	0.0341397	14800250	17700000	0.836172	-0.258128	-0.20315	0.220067	14800250	12450100	1.18877	0.249464	-0.0285901	0.367982
Q9R1P4	Proteasome subunit alpha type-1	Psma1	7	7068800	7597500	5398100	8084100	8523900	8471700	591593	7661400	7911200	7264100	4991200	5884500	7142100	8692000	5185600	5164800	7037125	6512750	1.08052	0.111719	-0.412303	0.59975	6.31215e+06	6546125	0.964257	-0.05251	-0.364722	0.511399	6546125	6512750	1.00512	0.0073743	-0.213289	0.982187	6.31215e+06	7037125	0.896978	-0.156855	-0.0361825	0.418748	6.31215e+06	6512750	0.969199	-0.0451357	-0.484862	0.49405
Q9R182	Angiopoietin-related protein 3	Angptl3	7	6858300	11505000	3749300	4075300	6673500	5695800	3307300	3861600	5341900	1261100	5500200	2240700	7051100	6092800	6988600	6117900	6546975	3585975	1.82572	0.868463	0.59095	0.115808	4884550	6562600	0.744301	-0.426042	-1.1539	0.0723513	6562600	3585975	1.83007	0.871902	1.20258	0.0386916	4884550	6546975	0.746077	-0.422603	-0.474318	0.432827	4884550	3585975	1.36213	0.44586	0.275585	0.237142
P04117	Fatty acid-binding protein, adipocyte	Fabp4	7	25987000	1525800	2536700	1368000	8851800	3872600	1645600	5524200	697888	691890	1159900	1511500	51590000	38223000	731956	601777	7854375	1.01529e+06	7.73606	2.9516	3.35267	0.0665493	4973550	2.27867e+07	0.218266	-2.19584	-4.89303	0.82359	NA	NA	NA	NA	NA	NA	4973550	7854375	0.63322	-0.65922	-0.864428	0.768959	4973550	1.01529e+06	4.89863	2.29238	3.13544	0.00294743
P28666	Murinoglobulin-2	Mug2	7	45309000	40626000	29260000	31184000	44274000	36542000	33453000	35167000	38781000	26126000	35637000	29521000	36890000	43612000	26175000	32101000	36594750	32516250	1.12543	0.170476	-0.334407	0.471963	37359000	34694500	1.0768	0.106749	-0.0282493	0.514306	34694500	32516250	1.06699	0.0935461	-0.072162	0.695331	37359000	36594750	1.02088	0.0298191	0.271585	0.814214	37359000	32516250	1.14893	0.200295	-0.104743	0.29421
P04247	Myoglobin	Mb	7	91103000	19748000	72628000	22996000	26583000	121620000	22430000	86670000	9771700	12517000	78253000	57875000	69779000	100130000	50009000	15696000	51618750	39604175	1.30337	0.382243	-0.0536566	0.468358	64325750	58903500	1.09205	0.127043	0.014627	0.948803	58903500	39604175	1.48731	0.572701	0.712569	0.339971	64325750	51618750	1.24617	0.317501	0.745884	0.722424	64325750	39604175	1.62422	0.699744	0.668796	0.325378
O70165	Ficolin-1	Fcn1	7	56557000	48607000	40738000	43851000	48573000	40291000	40420000	39140000	44855000	40017000	41855000	37027000	49867000	45605000	41239000	47510000	47438250	40938500	1.15877	0.212593	-0.27857	0.265995	42106000	46055250	0.91425	-0.12934	-0.527043	0.307346	46055250	40938500	1.12499	0.169907	0.052898	0.264945	42106000	47438250	0.887596	-0.172025	-0.061193	0.30809	42106000	40938500	1.02852	0.0405676	-0.352126	0.806463
P14152	Malate dehydrogenase, cytoplasmic	Mdh1	7	18978000	7004400	16475000	5351200	7606700	22061000	6468600	15944000	697888	2360400	12192000	13960000	12044000	22612000	12389000	4705100	11952150	7.30257e+06	1.6367	0.710794	0.38192	0.192087	13020075	12937525	1.00638	0.00917611	-0.234395	0.957026	12937525	7.30257e+06	1.77164	0.825085	1.12591	0.167993	13020075	11952150	1.08935	0.123468	0.425983	0.802567	13020075	7.30257e+06	1.78294	0.834261	0.877134	0.157109
Q19LI2	Alpha-1B-glycoprotein	A1bg	7	7013900	816550	569554	3051600	661377	2493800	591593	6410800	697888	475176	425807	497180	663032	404724	731956	601777	NA	NA	NA	NA	NA	NA	NA	NA	NA	NA	NA	NA	NA	NA	NA	NA	NA	NA	NA	NA	NA	NA	NA	NA	NA	NA	NA	NA	NA	NA
F8WH29	Fibrocystin-L	Pkhd1l1	6	2614600	2781700	2990500	4099900	1949700	2434300	1751200	1895600	1711600	2146500	2351200	497180	2057500	404724	731956	601777	3121675	1676620	1.86189	0.896765	0.628471	0.0472721	2007700	948989	2.11562	1.08108	2.03026	0.0182628	NA	NA	NA	NA	NA	NA	2007700	3121675	0.643148	-0.636777	-0.827425	0.0100551	2007700	1676620	1.19747	0.259988	-0.0122911	0.34591
Q3U2G2	Heat shock 70 kDa protein 4	Hspa4	6	5816500	6646700	4807300	5265400	5484000	5581800	4322800	5477400	3504600	4535700	4970200	4271600	3045700	5172500	4374100	3513100	5633975	4320525	1.304	0.382947	-0.0527235	0.0716856	5216500	4026350	1.29559	0.37361	0.535558	0.0708034	4026350	4320525	0.931912	-0.101734	-0.39198	0.582436	5216500	5633975	0.9259	-0.111071	0.0393012	0.512783	5216500	4320525	1.20738	0.271876	0.00612016	0.15477
Q8C165	Probable carboxypeptidase PM20D1	Pm20d1	6	4262300	3138100	3237000	5747800	3272300	4097700	3022400	3469400	1776000	1658500	2874400	1647100	2423100	3366900	1815500	2841400	4096300	1989000	2.05948	1.04228	0.821385	0.00459591	3465450	2611725	1.32688	0.40804	0.6083	0.0677711	2611725	1989000	1.31308	0.39296	0.4182	0.161985	3465450	4096300	0.845995	-0.241279	-0.175371	0.379496	3465450	1989000	1.74231	0.800999	0.825619	0.00549697
Q60994	Adiponectin	Adipoq	6	570890000	545860000	395900000	519280000	424640000	457330000	272450000	287200000	200940000	349650000	384690000	199840000	418530000	448270000	336330000	345940000	507982500	283780000	1.79006	0.840006	0.553223	0.0103822	360405000	387267500	0.930636	-0.103711	-0.472897	0.551068	387267500	283780000	1.36468	0.448558	0.509255	0.0890136	360405000	507982500	0.709483	-0.49516	-0.593942	0.0475931	360405000	283780000	1.27002	0.344846	0.119136	0.24741
P40142	Transketolase	Tkt	6	5205800	5343500	2198600	3546400	2913400	5393400	3377300	3435500	1770600	1549200	2408200	2664500	2398900	3379000	1490200	2235500	4073575	2098125	1.94153	0.957195	0.708586	0.0224889	3779900	2375900	1.59093	0.669874	1.16149	0.0429237	2375900	2098125	1.13239	0.179373	0.068401	0.60264	3779900	4073575	0.927907	-0.107947	0.044451	0.852332	3779900	2098125	1.80156	0.849247	0.900344	0.0114972
Q8HWB2	Histocompatibility 2, Q region locus 4	H2-Q4	6	19576000	24219000	18167000	18058000	18172000	22909000	19209000	14355000	19303000	16175000	19317000	11933000	20779000	12154000	12886000	14946000	20005000	16682000	1.1992	0.262068	-0.212978	0.226794	18661250	15191250	1.22842	0.296805	0.37329	0.18712	15191250	16682000	0.910637	-0.135052	-0.446546	0.566182	18661250	20005000	0.932829	-0.100315	0.0570345	0.56586	18661250	16682000	1.11865	0.161753	-0.164435	0.474611
P70428	Exostosin-2	Ext2	6	6080900	6885700	4367000	4818500	4540900	676328	5155000	3648800	2323300	2118500	3953000	2285600	4553400	4299000	4501500	3151200	5538025	2670100	2.07409	1.05248	0.834908	0.00255315	3.50526e+06	4126275	0.849497	-0.23532	-0.750952	0.385131	4126275	2670100	1.54536	0.627946	0.803047	0.0235254	3.50526e+06	5538025	0.632944	-0.659851	-0.865468	0.147471	3.50526e+06	2670100	1.31278	0.392626	0.193137	0.88283
P16406	Glutamyl aminopeptidase	Enpep	6	5321400	6240900	3519700	4590300	3972800	6271700	591593	2578800	697888	2581400	2716000	497180	3617100	4634200	3294900	3233400	4918075	1.62312e+06	3.03002	1.59933	1.55989	0.00807134	3.35372e+06	3694900	0.907663	-0.139772	-0.549083	0.423662	3694900	1.62312e+06	2.27642	1.18677	1.71825	0.023168	3.35372e+06	4918075	0.681918	-0.55233	-0.688199	0.187517	NA	NA	NA	NA	NA	NA
P11087	Collagen alpha-1(I) chain	Col1a1	6	8575800	11313000	6102300	7065600	12061000	10340000	12087000	12747000	4656400	6157500	7307000	6110900	12455000	11512000	7098800	11317000	8264175	6057950	1.36419	0.448041	0.0335757	0.112807	11808750	10595700	1.11449	0.156377	0.0766029	0.367774	10595700	6057950	1.74906	0.806577	1.0956	0.00799207	11808750	8264175	1.42891	0.514914	1.07136	0.0282598	11808750	6057950	1.9493	0.962955	1.07645	0.000601982
D3Z0Y2	Peroxiredoxin-6	Prdx6	6	11814000	4898600	4639800	1081400	2918200	9462200	1996100	7618600	697888	475176	1060800	6208000	2880900	4499000	731956	1576600	5608450	2.11047e+06	2.65745	1.41004	1.30895	0.0888148	5498775	2.42211e+06	2.27024	1.18284	2.24526	0.121227	NA	NA	NA	NA	NA	NA	5498775	5608450	0.980445	-0.0284919	0.175449	0.868707	5498775	2.11047e+06	2.60548	1.38155	1.72476	0.0535129
Q9EQH2	Endoplasmic reticulum aminopeptidase 1	Erap1	6	6561900	6991900	4614600	4484800	7830700	5769100	5255800	5135400	4892000	3260000	5551600	3119100	4636300	5726500	4352000	3925200	5663300	4205675	1.34659	0.429306	0.00873703	0.127693	5997750	4660000	1.28707	0.364091	0.515449	0.0867956	4660000	4205675	1.10803	0.147993	0.0170072	0.469685	5997750	5663300	1.05906	0.0827784	0.358899	0.688679	5997750	4205675	1.42611	0.512084	0.378151	0.0636663
P11352	Glutathione peroxidase 1;Glutathione peroxidase	Gpx1	6	16981000	12778000	9156700	5528300	8901700	17653000	6070900	13147000	697888	475176	6738100	7541400	8843900	15904000	731956	7396900	11111000	3.86314e+06	2.87616	1.52414	1.46022	0.0356136	11443150	8.21919e+06	1.39225	0.477416	0.754875	0.299487	NA	NA	NA	NA	NA	NA	11443150	11111000	1.02989	0.0424956	0.292485	0.914213	11443150	3.86314e+06	2.96214	1.56664	2.01143	0.0352092
P13597-2	Intercellular adhesion molecule 1	Icam1	6	13726000	15679000	10826000	12767000	11709000	13723000	11396000	9975400	10496000	9951300	12418000	6305300	11263000	13966000	11725000	9840200	13249500	9792650	1.353	0.436167	0.0178331	0.0893635	11700850	11698550	1.0002	0.000283614	-0.253183	0.988144	11698550	9792650	1.19463	0.256558	0.19481	0.250904	11700850	13249500	0.883116	-0.179325	-0.0732279	0.320768	11700850	9792650	1.19486	0.256842	-0.0171634	0.251054
Q9R0E2	Procollagen-lysine,2-oxoglutarate 5-dioxygenase 1	Plod1	6	4803700	4161800	3417300	4709000	4820100	4143300	3275300	2900800	3674600	3087000	3179400	2233100	3625300	4461200	3733100	3555500	4272950	3043525	1.40395	0.489489	0.0885255	0.0441439	3784875	3843775	0.984677	-0.0222782	-0.30085	0.81319	3843775	3043525	1.26294	0.336781	0.326193	0.0969992	3784875	4272950	0.885776	-0.174987	-0.0660762	0.377009	3784875	3043525	1.24358	0.314502	0.07214	0.216644
Q60805	Tyrosine-protein kinase Mer	Mertk	6	12765000	13526000	9590600	10446000	13191000	13312000	10293000	10100000	8683100	8298700	10020000	7009300	10511000	11336000	11572000	9390100	11581900	8502775	1.36213	0.445866	0.0306924	0.0491515	11724000	10702275	1.09547	0.131547	0.0241435	0.414726	10702275	8502775	1.25868	0.331912	0.318219	0.0705576	11724000	11581900	1.01227	0.0175929	0.251428	0.91471	11724000	8502775	1.37884	0.463459	0.302842	0.0353391
Q8R242	Di-N-acetylchitobiase	Ctbs	6	11674000	10286000	10248000	12775000	10780000	11630000	10429000	9973700	8613300	7461100	11560000	7620400	11053000	11247000	10604000	9899200	11245750	8813700	1.27594	0.35156	-0.0943339	0.0962596	10703175	10700800	1.00022	0.000320165	-0.253106	0.998223	10700800	8813700	1.21411	0.279899	0.233036	0.127466	10703175	11245750	0.951753	-0.0713411	0.104804	0.627098	10703175	8813700	1.21438	0.280219	0.0190426	0.140208
Q3TVK3	Aspartyl aminopeptidase	Dnpep	6	4532800	4230300	569554	5252600	3356200	5267200	2836700	2958700	2807600	4714900	3388400	3543100	3900100	2727900	1036300	2711800	3.64631e+06	3613500	1.00908	0.0130417	-0.543125	0.593871	3604700	2594025	1.38962	0.474687	0.749108	0.198663	2594025	3613500	0.71787	-0.478205	-1.00854	0.159744	3604700	3.64631e+06	0.988588	-0.0165594	0.195122	0.631515	3604700	3613500	0.997565	-0.0035177	-0.420404	0.924667
Q91X79	Chymotrypsin-like elastase family member 1	Cela1	6	15841000	12417000	10616000	10591000	14420000	10881000	11195000	10259000	11926000	10294000	13429000	7471600	14542000	11070000	9838400	11951000	12366250	10780150	1.14713	0.198031	-0.297875	0.398431	11688750	11850350	0.986363	-0.019809	-0.295633	0.917952	11850350	10780150	1.09928	0.136552	-0.00172881	0.50421	11688750	12366250	0.945214	-0.0812874	0.0884051	0.701013	11688750	10780150	1.08428	0.116743	-0.234146	0.555305
Q5FW60	Major urinary protein 20	Mup20	6	24774000	20072000	31831000	22580000	30000000	23892000	40491000	30267000	36118000	18442000	33751000	42067000	35848000	27554000	19243000	22665000	24814250	32594500	0.761302	-0.39346	-1.08204	0.251774	31162500	26327500	1.18365	0.24324	0.260122	0.306921	26327500	32594500	0.807728	-0.308058	-0.729885	0.372869	31162500	24814250	1.25583	0.328642	0.764252	0.163315	31162500	32594500	0.956066	-0.0648176	-0.515345	0.928998
P11404	Fatty acid-binding protein, heart	Fabp3	6	24672000	5162000	16596000	5077900	5860500	28800000	3979300	14316000	697888	2958800	15881000	11309000	16633000	22931000	10321000	2562100	12876975	7.71167e+06	1.6698	0.739678	0.420213	0.256222	13238950	13111775	1.0097	0.0139257	-0.224361	0.984063	13111775	7.71167e+06	1.70025	0.765747	1.02873	0.290754	13238950	12876975	1.02811	0.039995	0.288362	0.959488	13238950	7.71167e+06	1.71674	0.779673	0.792589	0.289668
P01592	Immunoglobulin J chain	Igj	5	21882000	23769000	10170000	12359000	12097000	10342000	7281000	2358000	13159000	10337000	8428200	6531700	4692100	3564800	6443900	9590700	17045000	9613975	1.77294	0.826144	0.534845	0.0487836	8019500	6072875	1.32054	0.401133	0.593707	0.642225	6072875	9613975	0.631672	-0.662753	-1.31078	0.0673903	8019500	17045000	0.47049	-1.08776	-1.57096	0.0513688	8019500	9613975	0.83415	-0.261621	-0.82015	0.397673
Q3U9N4	Granulins;Acrogranin;Granulin-1;Granulin-2;Granulin-3;Granulin-4;Granulin-5;Granulin-6;Granulin-7	Grn	5	4410500	4018400	3841600	5251200	5646600	2421200	4187800	3082800	5831600	4285600	5182700	4371800	3147100	2180200	2478500	3207700	4380425	4917925	0.890706	-0.166979	-0.781787	0.397763	3834600	2753375	1.39269	0.477875	0.755844	0.164387	2753375	4917925	0.559865	-0.836849	-1.59591	0.00198598	3834600	4380425	0.875395	-0.191995	-0.0941171	0.369021	3834600	4917925	0.779719	-0.358974	-0.970929	0.164702
P12246	Serum amyloid P-component	Apcs	5	64025000	73667000	47615000	177910000	25916000	20606000	47024000	37394000	559300000	171770000	34390000	141630000	36387000	34267000	30510000	21945000	90804250	226772500	0.40042	-1.32041	-2.31095	0.287255	32735000	30777250	1.06361	0.0889696	-0.0658122	0.886378	30777250	226772500	0.135719	-2.88131	-4.9442	0.0124924	32735000	90804250	0.360501	-1.47193	-2.20433	0.0142249	32735000	226772500	0.144352	-2.79234	-4.73969	0.0164719
O09043	Napsin-A	Napsa	5	11186000	11070000	8460800	9234300	8005500	9251600	7029800	5557000	6299200	5654200	6350700	4710200	7863200	7990200	5890900	5926400	9987775	5753575	1.73593	0.795705	0.494491	0.00215534	7460975	6917675	1.07854	0.109077	-0.0233307	0.623323	6917675	5753575	1.20233	0.265829	0.209992	0.189703	7460975	9987775	0.747011	-0.420799	-0.471345	0.0537952	7460975	5753575	1.29675	0.374906	0.165691	0.115622
Q9R111	Guanine deaminase	Gda	5	6839200	5097600	3561900	4407200	2939700	6836200	5889000	6668700	2968300	2701300	3509900	2520100	3460100	3651800	3568500	3034100	4976475	2924900	1.70142	0.766737	0.456087	0.0124312	5583400	3428625	1.62847	0.703514	1.23256	0.0495114	3428625	2924900	1.17222	0.229243	0.150074	0.175154	5583400	4976475	1.12196	0.16602	0.496138	0.690413	5583400	2924900	1.90892	0.932757	1.02968	0.0166469
Q64442	Sorbitol dehydrogenase	Sord	5	14072000	20297000	8125900	9173200	8367800	10667000	8599200	7855000	2890600	6862400	8255800	9298400	11415000	8544900	4341600	5521800	12917025	6826800	1.89211	0.919992	0.659265	0.0558091	8872250	7455825	1.18998	0.250932	0.276372	0.288578	7455825	6826800	1.09214	0.127159	-0.0171136	0.730773	8872250	12917025	0.686865	-0.541902	-0.671006	0.159948	8872250	6826800	1.29962	0.378091	0.170624	0.202832
G3X9D6	Apolipoprotein N	Apon	5	310360000	403690000	194390000	322770000	256690000	303780000	227690000	253490000	251550000	125500000	158630000	131750000	313760000	154440000	181890000	170270000	307802500	166857500	1.8447	0.883388	0.610737	0.0166183	260412500	205090000	1.26975	0.344542	0.474145	0.127701	205090000	166857500	1.22913	0.297641	0.262092	0.351665	260412500	307802500	0.846038	-0.241206	-0.175252	0.410682	260412500	166857500	1.56069	0.642182	0.579645	0.0216604
Q91XL1	Leucine-rich HEV glycoprotein	Lrg1	5	1214400000	1471700000	1077900000	2655400000	1287400000	1228900000	1194100000	833720000	1984400000	1185200000	1124600000	1009600000	1225700000	1161100000	915240000	822830000	1604850000	1325950000	1.21034	0.275412	-0.195287	0.500311	1136030000	1031217500	1.10164	0.139652	0.0412671	0.49848	1031217500	1325950000	0.77772	-0.362678	-0.819338	0.222406	1136030000	1604850000	0.707873	-0.498438	-0.599346	0.192232	1136030000	1325950000	0.856767	-0.223025	-0.760374	0.479369
B7ZCG3	BPI fold-containing family A member 2	Bpifa2	5	10507000	13988000	26255000	8922200	9572500	19099000	4803200	3971000	3273200	1449100	18898000	4435600	6942900	16312000	5961800	3746300	14918050	7013975	2.1269	1.08875	0.883002	0.0538438	9361425	8240750	1.13599	0.183953	0.134862	0.852483	8240750	7013975	1.1749	0.232543	0.155479	0.406131	9361425	14918050	0.627523	-0.672259	-0.885924	0.167895	9361425	7013975	1.33468	0.416496	0.230106	0.355488
Q61830	Macrophage mannose receptor 1	Mrc1	5	2953800	2554900	1416400	1606300	2079000	2581700	2076100	1335100	1385600	1934800	1022700	1162000	1998200	1713000	917760	601777	2132850	1376275	1.54973	0.632014	0.277477	0.0797939	2017975	1.30768e+06	1.54317	0.625894	1.06857	0.103325	1.30768e+06	1376275	0.950162	-0.0737545	-0.346157	0.649279	2017975	2132850	0.94614	-0.0798742	0.0907351	0.8676	2017975	1376275	1.46626	0.55214	0.440189	0.0751801
A0A5K1VVQ1	Titin	Ttn	5	38350000	30216000	26597000	49243000	31945000	32518000	30009000	32710000	50021000	30363000	18879000	24725000	32361000	28570000	24231000	20785000	36101500	30997000	1.16468	0.21993	-0.268842	0.427238	31795500	26486750	1.20043	0.263552	0.303035	0.103023	26486750	30997000	0.854494	-0.226858	-0.5969	0.630579	31795500	36101500	0.880725	-0.183236	-0.0796769	0.498731	31795500	30997000	1.02576	0.036694	-0.358125	0.657951
P51910	Apolipoprotein D	Apod	5	67469000	80116000	63193000	67742000	81120000	94742000	74261000	73795000	59908000	44118000	105490000	56280000	94027000	64250000	91066000	82027000	69630000	66449000	1.04787	0.0674615	-0.470978	0.617531	80979500	82842500	0.977512	-0.0328144	-0.32311	0.879461	82842500	66449000	1.24671	0.318124	0.295638	0.205262	80979500	69630000	1.163	0.217848	0.581586	0.174131	80979500	66449000	1.21867	0.285309	0.0269261	0.223791
P14106	Complement C1q subcomponent subunit B	C1qb	5	39536000	33607000	42091000	33433000	63467000	46584000	23662000	54494000	37256000	41421000	33576000	24995000	43173000	41721000	40824000	41804000	37166750	34312000	1.0832	0.115299	-0.407557	0.535429	47051750	41880500	1.12348	0.16797	0.101095	0.795505	41880500	34312000	1.22058	0.287565	0.245591	0.123578	47051750	37166750	1.26596	0.340236	0.783367	0.41716	47051750	34312000	1.37129	0.455535	0.290569	0.264926
P08228	Superoxide dismutase [Cu-Zn]	Sod1	5	10177000	6714600	5986300	3380500	4133300	9929300	4173100	10759000	1248400	996520	3966300	8555100	5907600	7424100	2413500	2343700	6564600	3691580	1.77826	0.830469	0.540579	0.0996368	7248675	4522225	1.6029	0.680685	1.18433	0.196511	4522225	3691580	1.22501	0.292794	0.254155	0.403323	7248675	6564600	1.10421	0.14301	0.458202	0.822442	7248675	3691580	1.96357	0.973479	1.09275	0.0900011
A0A0R4J0M6	Collectin-11	Colec11	5	17665000	20304000	8999100	15315000	20774000	11768000	15487000	13365000	11766000	8796300	11163000	5716600	10032000	12611000	11797000	13775000	15570775	9360475	1.66346	0.734187	0.412934	0.0534806	15348500	12053750	1.27334	0.348616	0.482753	0.139506	12053750	9360475	1.28773	0.364828	0.372128	0.137671	15348500	15570775	0.985725	-0.0207431	0.188224	0.977497	15348500	9360475	1.63971	0.713444	0.690014	0.0310726
A0A0R4IZZ5	C-type lectin domain family 4 member F	Clec4f	5	4315800	5231900	4168100	2921100	3919000	4972900	4756600	4134000	3398400	1357700	4545100	2741900	3868400	3261800	4041200	2459800	4159225	3010775	1.38145	0.46618	0.0576231	0.164389	4445625	3407800	1.30454	0.383546	0.556551	0.0590519	3407800	3010775	1.13187	0.178706	0.0673074	0.46129	4445625	4159225	1.06886	0.0960715	0.380815	0.563552	4445625	3010775	1.47657	0.562251	0.45585	0.0840822
Q11136	Xaa-Pro dipeptidase	Pepd	5	9468200	11454000	7775700	8171500	8052900	11006000	6072300	6726300	6687800	8420800	6824600	4952200	8774900	9229900	7458500	5877500	9217350	6721350	1.37135	0.455601	0.0435982	0.0654561	7964375	7835200	1.01649	0.0235911	-0.20394	0.976198	7835200	6721350	1.16572	0.221219	0.136933	0.335657	7964375	9217350	0.864063	-0.210791	-0.125106	0.328503	7964375	6721350	1.18494	0.24481	-0.0357983	0.373171
Q05909	Receptor-type tyrosine-protein phosphatase gamma;Protein-tyrosine-phosphatase	Ptprg	5	15502000	14305000	10000000	8328300	11422000	13002000	7825700	8963800	5717100	5110700	10812000	5204400	8682900	10998000	11664000	7216500	12033825	6711050	1.79314	0.842485	0.556509	0.021917	10303375	9640350	1.06878	0.0959596	-0.0510443	0.682924	9640350	6711050	1.43649	0.522547	0.63043	0.0771934	10303375	12033825	0.856201	-0.223978	-0.146848	0.443578	10303375	6711050	1.53529	0.618507	0.542977	0.0502837
P63101	14-3-3 protein zeta/delta	Ywhaz	5	4586200	4564200	3633300	3120400	3056200	5062900	3275500	3149100	1938800	1961500	3273600	2933600	2783400	5490400	2873600	2218200	3976025	2526875	1.57349	0.653973	0.306589	0.022825	3635925	3341400	1.08814	0.12187	0.00369721	0.571949	3341400	2526875	1.32234	0.403098	0.434804	0.292235	3635925	3976025	0.914462	-0.129004	0.00973458	0.528734	3635925	2526875	1.4389	0.524968	0.398106	0.0709426
Q8CFZ6	Tetranectin	Clec3b	5	66084000	58581000	46877000	44253000	54212000	53103000	33843000	40263000	30578000	45029000	56753000	35582000	45272000	50323000	48225000	44840000	53948750	41985500	1.28494	0.361698	-0.0808932	0.153108	45355250	47165000	0.961629	-0.0564471	-0.37304	0.647112	47165000	41985500	1.12336	0.167825	0.0494884	0.351976	45355250	53948750	0.84071	-0.25032	-0.190277	0.260063	45355250	41985500	1.08026	0.111378	-0.242455	0.637032
Q9EQI5	Chemokine subfamily B Cys-X-Cys	Ppbp	5	80112000	50043000	337000000	115450000	661377	365990000	25123000	45354000	2919000	4765300	138110000	151670000	170390000	176790000	31633000	3493000	145651250	74366075	1.95857	0.969802	0.725299	0.135855	1.09282e+08	95576500	1.1434	0.193329	0.154673	0.67078	95576500	74366075	1.28522	0.362011	0.367514	0.623004	1.09282e+08	145651250	0.7503	-0.414461	-0.460895	0.218903	1.09282e+08	74366075	1.46952	0.555341	0.445146	0.99261
Q8BHN3-2	Neutral alpha-glucosidase AB	Ganab	5	4594200	4153000	3355400	4092700	5023300	5463600	4754200	3691700	4565300	3299400	3485700	2544100	5635500	4652400	4531700	3669500	4048825	3473625	1.16559	0.221061	-0.267343	0.293518	4733200	4622275	1.024	0.0342128	-0.181499	0.845002	4622275	3473625	1.33068	0.412161	0.449647	0.0862406	4733200	4048825	1.16903	0.225313	0.593894	0.236637	4733200	3473625	1.36261	0.446374	0.27638	0.0699356
P17182	Alpha-enolase;Enolase	Eno1	5	8322500	4785000	8082800	3893900	5385100	10530000	4304200	8395600	3132600	2635400	4277700	7694200	4275300	8333100	4213100	2706500	6271050	4434975	1.414	0.499781	0.10217	0.193995	7153725	4882000	1.46533	0.551222	0.910808	0.183913	4882000	4434975	1.1008	0.138546	0.00153669	0.739275	7153725	6271050	1.14075	0.189988	0.535654	0.638664	7153725	4434975	1.61302	0.689769	0.653346	0.107356
P08121	Collagen alpha-1(III) chain	Col3a1	5	2986000	2088400	991980	1801800	1808800	2295200	2308100	2517100	1621100	1203200	986670	1050100	1545300	1466800	1330700	1614900	1967045	1.21527e+06	1.61861	0.694756	0.360658	0.103494	2232300	1489425	1.49877	0.583775	0.979584	0.00310414	1489425	1.21527e+06	1.22559	0.293482	0.25528	0.131792	2232300	1967045	1.13485	0.182501	0.523311	0.406683	2232300	1.21527e+06	1.83688	0.877257	0.943725	0.00237095
Q02105	Complement C1q subcomponent subunit C	C1qc	5	33181000	30631000	40381000	32293000	53446000	36042000	21084000	45184000	30423000	32499000	24646000	24736000	34785000	34893000	38740000	40425000	34121500	28076000	1.21533	0.281344	-0.187423	0.151737	38939000	37210750	1.04644	0.0654964	-0.115405	0.964391	37210750	28076000	1.32536	0.406382	0.440182	0.029537	38939000	34121500	1.14119	0.190535	0.536556	0.690632	38939000	28076000	1.38691	0.471878	0.315881	0.207797
P10649	Glutathione S-transferase Mu 1	Gstm1	5	4064000	3283200	3714700	4606500	661377	4267200	1491200	1989100	853300	1819300	2823500	20978000	4919500	5675000	2311300	601777	3917100	6618525	0.591839	-0.756724	-1.56364	0.706033	NA	NA	NA	NA	NA	NA	3.37689e+06	6618525	0.510219	-0.970813	-1.81531	0.774369	2.10222e+06	3917100	0.536677	-0.897873	-1.25789	0.0437623	2.10222e+06	6618525	0.317627	-1.6546	-2.97757	0.398491
Q9R1P0	Proteasome subunit alpha type-4;Proteasome subunit alpha type	Psma4	5	16435000	11838000	9509800	13367000	14500000	12110000	4441400	10317000	11493000	11969000	12391000	9541400	12072000	14392000	9783900	7387000	12787450	11348600	1.12679	0.172214	-0.332102	0.489987	10342100	10908725	0.948058	-0.0769533	-0.416364	0.690104	10908725	11348600	0.96124	-0.0570318	-0.31877	0.690125	10342100	12787450	0.80877	-0.306199	-0.282405	0.307403	10342100	11348600	0.911311	-0.133985	-0.62247	0.493058
P28843	Dipeptidyl peptidase 4;Dipeptidyl peptidase 4 membrane form;Dipeptidyl peptidase 4 soluble form	Dpp4	5	8159900	6179000	4320800	5369500	5928500	4790600	3387700	3489500	3892300	4412800	4324600	3146100	5117500	6851700	4116500	4090700	6007300	3943950	1.52317	0.607075	0.244415	0.0357186	4399075	5044100	0.872123	-0.197397	-0.67083	0.431239	5044100	3943950	1.27895	0.354956	0.355959	0.156979	4399075	6007300	0.732288	-0.449517	-0.518691	0.119917	4399075	3943950	1.1154	0.157559	-0.170932	0.585913
O89103	Complement component C1q receptor	Cd93	5	7963600	6239000	4534400	5770200	7954300	5905000	4931700	3880800	4023200	4863000	4717500	3309700	6035900	5091600	4727700	5501000	6126800	4228350	1.44898	0.535039	0.148913	0.0471576	5667950	5339050	1.0616	0.086244	-0.0715708	0.852854	5339050	4228350	1.26268	0.336488	0.325714	0.0828756	5667950	6126800	0.925108	-0.112307	0.0372639	0.623763	5667950	4228350	1.34046	0.422732	0.239765	0.158998
Q01149	Collagen alpha-2(I) chain	Col1a2	5	9221800	12708000	7831600	9399800	10630000	10552000	11194000	12300000	4512200	6064600	7815700	7103500	13546000	12974000	8640500	9426700	9790300	6374000	1.53597	0.619154	0.260429	0.0274498	11169000	11146800	1.00199	0.00287042	-0.247718	0.878908	11146800	6374000	1.74879	0.806359	1.09524	0.0083823	11169000	9790300	1.14082	0.190075	0.535798	0.255728	11169000	6374000	1.75227	0.809229	0.838365	0.00299303
P21765	Epididymal secretory glutathione peroxidase	Gpx5	5	4427300	3049700	2375600	4845500	6442600	3989100	3428300	4145200	1971400	3334900	4742900	1560500	4074200	5833000	6094100	2392000	3674525	2902425	1.26602	0.340299	-0.109263	0.311901	4501300	4598325	0.9789	-0.0307667	-0.318784	0.956027	4598325	2902425	1.5843	0.66385	0.861847	0.131061	4501300	3674525	1.225	0.292784	0.705133	0.315258	4501300	2902425	1.55088	0.633083	0.565552	0.0865648
O70435	Proteasome subunit alpha type-3	Psma3	5	14852000	14068000	8393200	11081000	11115000	13624000	4878100	11308000	14130000	11938000	10493000	8633700	12242000	14216000	7890300	7691000	12098550	11298675	1.07079	0.0986806	-0.429589	0.732899	10231275	10509825	0.973496	-0.0387527	-0.335656	0.820705	10509825	11298675	0.930182	-0.104415	-0.396371	0.620694	10231275	12098550	0.845661	-0.241848	-0.17631	0.403385	10231275	11298675	0.905529	-0.143168	-0.636692	0.53312
Q9QUM9	Proteasome subunit alpha type-6	Psma6	5	21144000	20820000	13085000	13981000	16803000	20298000	5424200	13068000	12913000	16491000	13899000	11324000	16630000	18985000	14049000	11875000	17257500	13656750	1.26366	0.337609	-0.112829	0.202695	13898300	15384750	0.903382	-0.146593	-0.563494	0.503739	15384750	13656750	1.12653	0.171887	0.0561397	0.437353	13898300	17257500	0.805348	-0.312315	-0.292488	0.321338	13898300	13656750	1.01769	0.0252942	-0.375781	0.771638
P47791-2	Glutathione reductase, mitochondrial	Gsr	5	7733300	9219600	5373800	5985400	5322600	5896600	6438600	7768500	6785300	8263500	6139400	5795200	6431200	7780100	6477500	4758500	7078025	6745850	1.04924	0.0693466	-0.468479	0.828373	6356575	6361825	0.999175	-0.00119105	-0.256298	0.973513	6361825	6745850	0.943072	-0.0845596	-0.363853	0.653685	6356575	7078025	0.898072	-0.155097	-0.0332844	0.536882	6356575	6745850	0.942294	-0.0857506	-0.547765	0.660357
A0A6I8MX27	L-lactate dehydrogenase B chain;L-lactate dehydrogenase	Ldhb	5	6057900	816550	8635600	3386900	3242900	7818400	1373000	7143200	2291900	2612200	5744400	3705000	5084100	10209000	4942700	2098500	4.72424e+06	3588375	1.31654	0.396751	-0.0344224	0.948437	4894375	5583575	0.876567	-0.190064	-0.655339	0.685231	5583575	3588375	1.55602	0.637858	0.81928	0.312591	4894375	4.72424e+06	1.03601	0.0510431	0.306577	0.819135	4894375	3588375	1.36395	0.447794	0.27858	0.684266
E9PZF0	Nucleoside diphosphate kinase	Gm20390	5	6685000	4111200	3888300	2475700	3326100	5344500	3111100	4240300	1597500	1681900	2590000	4653300	3656600	5568900	3452300	2026700	4290050	2630675	1.63078	0.705561	0.374983	0.100195	4005500	3676125	1.0896	0.123797	0.00776799	0.587517	3676125	2630675	1.39741	0.482753	0.565258	0.230044	4005500	4290050	0.933672	-0.0990121	0.0591826	0.893569	4005500	2630675	1.52261	0.606549	0.524458	0.0838636
Q8QZR3	Pyrethroid hydrolase Ces2a	Ces2a	5	10084000	10304000	6682400	10628000	9077000	9806400	7197200	7507300	5482200	4396900	5136600	2989300	9801700	8489800	8030700	8450500	9424600	4501250	2.09377	1.06611	0.852975	0.00236019	8396975	8693175	0.965927	-0.0500135	-0.359448	0.690936	8693175	4501250	1.93128	0.949557	1.32976	0.00153995	8396975	9424600	0.890964	-0.166562	-0.0521858	0.456158	8396975	4501250	1.86548	0.899544	0.978243	0.00361568
P10852	4F2 cell-surface antigen heavy chain	Slc3a2	5	8789800	7350000	6272100	6330200	8166800	7067000	5214600	5527100	4360600	4539500	5358700	3844800	6369400	8049300	6822300	6672800	7185525	4525900	1.58765	0.666889	0.323713	0.00724296	6493875	6978450	0.930561	-0.103827	-0.473142	0.499558	6978450	4525900	1.54189	0.624702	0.797733	0.00423389	6493875	7185525	0.903744	-0.146014	-0.0183089	0.449463	6493875	4525900	1.43483	0.520875	0.391766	0.0354684
A0A1B0GR60	Ferritin light chain 1	Ftl1	5	10315000	9880800	3779500	5688900	2149900	5665800	1321200	3796500	697888	10021000	8958500	6020500	8039400	8109600	5968400	4840900	7416050	6.42447e+06	1.15434	0.207073	-0.285888	0.458828	3233350	6739575	0.479756	-1.05963	-2.4925	0.0239651	6739575	6.42447e+06	1.04905	0.0690797	-0.112232	0.480502	3233350	7416050	0.435994	-1.19762	-1.75208	0.034549	3233350	6.42447e+06	0.503286	-0.990548	-1.9491	0.470926
P12710	Fatty acid-binding protein, liver	Fabp1	5	977408	3738.1	569554	478172	661377	3840.5	4511.7	567918	697888	475176	3638	25529000	4263.3	4459	731956	601777	NA	NA	NA	NA	NA	NA	NA	NA	NA	NA	NA	NA	NA	NA	NA	NA	NA	NA	NA	NA	NA	NA	NA	NA	NA	NA	NA	NA	NA	NA
Q9QXF8	Glycine N-methyltransferase	Gnmt	5	977408	816550	472120	478172	661377	676328	591593	567918	697888	689570	497270	8627100	663032	404724	731956	601777	NA	NA	NA	NA	NA	NA	NA	NA	NA	NA	NA	NA	NA	NA	NA	NA	NA	NA	NA	NA	NA	NA	NA	NA	NA	NA	NA	NA	NA	NA
P07310	Creatine kinase M-type	Ckm	5	4517700	816550	3569000	478172	661377	8176700	1290400	4214100	697888	1296900	4621700	2921400	3525900	7268900	3336700	601777	NA	NA	NA	NA	NA	NA	NA	NA	NA	NA	NA	NA	NA	NA	NA	NA	NA	NA	NA	NA	NA	NA	NA	NA	NA	NA	NA	NA	NA	NA
Q9CZB2	Melanocyte protein PMEL;M-alpha;M-beta	Pmel	4	4932500	6321700	3770000	3216500	13711000	3311700	2572000	1573400	1757600	18897000	3460600	1760300	663032	3195200	731956	2581800	4560175	6468875	0.704941	-0.504426	-1.22916	0.759403	5292025	1.793e+06	2.9515	1.56145	3.04515	0.119679	1.793e+06	6468875	0.277173	-1.85114	-3.25706	0.135512	5292025	4560175	1.16049	0.214731	0.576447	0.684087	5292025	6468875	0.818075	-0.289695	-0.863631	0.970196
A0A0R4J0H5	N-acetylglucosamine-1-phosphotransferase subunit gamma	Gnptg	4	8872100	9043700	5948000	6511400	4752400	5982500	3915100	3589800	5108900	3237700	5475200	4325500	6017500	5533300	4628700	4372900	7593800	4536825	1.67381	0.743139	0.424802	0.012555	4559950	5138100	0.887478	-0.172217	-0.617632	0.359074	5138100	4536825	1.13253	0.179552	0.0686933	0.377091	4559950	7593800	0.600483	-0.735804	-0.99069	0.010268	4559950	4536825	1.0051	0.00733499	-0.403596	0.976834
P47879	Insulin-like growth factor-binding protein 4	Igfbp4	4	14121000	13866000	9363300	10229000	9445300	10372000	6782800	7916100	7641400	3995800	9138200	4678400	9544100	6735400	8511300	7690600	11894825	6363450	1.86924	0.902453	0.636012	0.01208	8629050	8120350	1.06265	0.0876598	-0.0685795	0.659661	8120350	6363450	1.27609	0.351733	0.350681	0.174258	8629050	11894825	0.725446	-0.46306	-0.54102	0.0567304	8629050	6363450	1.35603	0.439393	0.265568	0.128175
F8WIR1	Cathepsin D	Ctsd	4	6260000	7503700	5228900	7250700	6927300	5242300	7075100	6615900	6005700	5328800	3861700	4792200	5849300	5302000	3782700	3954700	6560825	4997100	1.31293	0.392786	-0.0396786	0.0881336	6465150	4722175	1.3691	0.453232	0.703781	0.035449	4722175	4997100	0.944983	-0.0816396	-0.359071	0.690526	6465150	6560825	0.985417	-0.0211934	0.187482	0.924658	6465150	4997100	1.29378	0.371593	0.160561	0.0840887
P47877	Insulin-like growth factor-binding protein 2	Igfbp2	4	3819900	4977600	3978900	3247000	6975800	7008300	5945200	5280100	6887800	6126000	11012000	4922500	5392600	6432100	4682600	4858300	4005850	7237075	0.553518	-0.853298	-1.69167	0.0164402	6302350	5341400	1.17991	0.238672	0.25047	0.157137	5341400	7237075	0.738061	-0.438189	-0.943006	0.171381	6302350	4005850	1.57329	0.653781	1.30031	0.00553051	6302350	7237075	0.870842	-0.199517	-0.723965	0.594631
P98064-2	Mannan-binding lectin serine protease 1;Mannan-binding lectin serine protease 1 heavy chain;Mannan-binding lectin serine protease 1 light chain	Masp1	4	11101000	10861000	6758400	8703300	10212000	6736600	10952000	6893400	7598500	7562400	8315800	4713900	6626100	6996400	7125100	7257700	9355925	7047650	1.32752	0.408738	-0.0185304	0.136576	8698500	7001325	1.24241	0.313139	0.407799	0.173422	7001325	7047650	0.993427	-0.0095143	-0.240948	0.913709	8698500	9355925	0.929732	-0.105114	0.049123	0.652723	8698500	7047650	1.23424	0.303624	0.0552922	0.275056
P05208	Chymotrypsin-like elastase family member 2A	Cela2a	4	10954000	7885300	8636700	6802900	9494200	8283200	11164000	9380500	13088000	9245600	11095000	8485600	14229000	8966500	11684000	11143000	8569725	10478550	0.817835	-0.290118	-0.945039	0.217647	9580475	11505625	0.832677	-0.26417	-0.811905	0.171857	11505625	10478550	1.09802	0.1349	-0.00443461	0.52782	9580475	8569725	1.11794	0.160848	0.487612	0.364499	9580475	10478550	0.914294	-0.12927	-0.615168	0.558541
P01887	Beta-2-microglobulin	B2m	4	346150000	416300000	315010000	284140000	292700000	357720000	300710000	300450000	278920000	157480000	280130000	212820000	345720000	199040000	248350000	222720000	340400000	232337500	1.46511	0.551009	0.170085	0.0402451	312895000	253957500	1.23208	0.301092	0.382346	0.113847	253957500	232337500	1.09305	0.128365	-0.0151376	0.608592	312895000	340400000	0.919198	-0.121552	0.0220205	0.501703	312895000	232337500	1.34673	0.429457	0.250179	0.06733
P68373	Tubulin alpha-1C chain	Tuba1c	4	4003200	3570500	3831200	3853100	2746300	3937900	5177000	3831800	3878800	3484100	4010600	4068400	3637300	4027700	731956	601777	3814500	3860475	0.988091	-0.0172844	-0.58333	0.918227	3923250	2.24968e+06	1.74391	0.802327	1.44133	0.0962932	2.24968e+06	3860475	0.582748	-0.779057	-1.50126	0.0772945	3923250	3814500	1.02851	0.0405553	0.289286	0.976468	3923250	3860475	1.01626	0.0232709	-0.378915	0.963608
Q8K1I3	Secreted phosphoprotein 24	Spp2	4	62605000	67963000	54591000	55215000	79176000	57916000	53126000	54263000	42633000	31509000	60017000	41212000	58073000	51926000	41872000	46998000	60093500	43842750	1.37066	0.454871	0.0426299	0.0574673	61120250	49717250	1.22936	0.297904	0.375612	0.131714	49717250	43842750	1.13399	0.181408	0.0717333	0.369214	61120250	60093500	1.01709	0.0244415	0.262719	0.950748	61120250	43842750	1.39408	0.479312	0.327395	0.0678431
Q8R2Y2	Cell surface glycoprotein MUC18	Mcam	4	6533900	7368900	3955900	5198000	4026500	4534000	4154000	3189500	1904900	3396400	4325500	2475200	4416700	5277300	4130400	3799700	5764175	3025500	1.9052	0.929941	0.672454	0.0128966	3976000	4406025	0.902401	-0.14816	-0.566806	0.371257	4406025	3025500	1.4563	0.542304	0.662787	0.0521845	3976000	5764175	0.689778	-0.535796	-0.66094	0.0516284	3976000	3025500	1.31416	0.394144	0.195488	0.134688
P07361	Alpha-1-acid glycoprotein 2	Orm2	4	29629000	42351000	26558000	157150000	24361000	24009000	142140000	72696000	274230000	88266000	34530000	179710000	50824000	19392000	16343000	19908000	63922000	144184000	0.443336	-1.17353	-2.11622	0.142356	65801500	26616750	2.47218	1.30579	2.50501	0.140878	26616750	144184000	0.184603	-2.4375	-4.21737	0.0083601	65801500	63922000	1.0294	0.0418079	0.291351	0.946903	65801500	144184000	0.456372	-1.13172	-2.16774	0.175558
Q8C7E4	Ribonuclease 4	Rnase4	4	10402000	11501000	10067000	13817000	12045000	7251900	10353000	3953700	12959000	6125400	14399000	7695700	11514000	9342100	8810000	8728900	11446750	10294775	1.1119	0.153026	-0.357541	0.460356	8400900	9598750	0.875208	-0.192303	-0.660068	0.394245	9598750	10294775	0.93239	-0.100994	-0.390768	0.940902	8400900	11446750	0.733911	-0.446322	-0.513424	0.139599	8400900	10294775	0.816035	-0.293296	-0.869209	0.456149
Q91WG0	Acylcarnitine hydrolase	Ces2c	4	4790700	5287900	2132000	4365600	5345400	4029700	4777800	567918	697888	475176	5136700	497180	4140700	4463300	6710600	7775600	4144050	1.70174e+06	2.43519	1.28403	1.14189	0.0236925	3.6802e+06	5772550	0.637535	-0.649423	-1.62584	0.189896	5772550	1.70174e+06	3.39215	1.7622	2.66066	0.00750294	3.6802e+06	4144050	0.88807	-0.171255	-0.0599244	0.502647	NA	NA	NA	NA	NA	NA
P05366	Serum amyloid A-1 protein	Saa1	4	9697400	26033000	19313000	755390000	14945000	17450000	12767000	10324000	55960000	14578000	14306000	26118000	17720000	13984000	13315000	12003000	202608350	27740500	7.3037	2.86863	3.24267	0.488453	13871500	14255500	0.973063	-0.0393948	-0.337013	0.802395	14255500	27740500	0.513888	-0.960475	-1.79838	0.118213	13871500	202608350	0.0684646	-3.8685	-6.15553	0.204595	13871500	27740500	0.500045	-0.99987	-1.96354	0.108137
Q9DC11	Plexin domain-containing protein 2	Plxdc2	4	8586200	10338000	6519700	8802500	10151000	11586000	9243200	7935000	6659200	6520900	6299100	5641500	8871000	11833000	9435400	9634400	8561600	6280175	1.36327	0.447076	0.0322957	0.0488447	9728800	9943450	0.978413	-0.0314846	-0.320301	0.821447	9943450	6280175	1.58331	0.662942	0.86036	0.00230209	9728800	8561600	1.13633	0.184381	0.526411	0.344432	9728800	6280175	1.54913	0.631457	0.563034	0.00601265
P21460	Cystatin-C	Cst3	4	8995200	9666500	6878800	6238600	8850600	7679200	7056500	7792700	7342000	5144200	6492600	4810700	9903200	5839500	3907000	5725400	7944775	5947375	1.33585	0.417753	-0.00657839	0.0983212	7844750	6343775	1.23661	0.306386	0.393532	0.186395	6343775	5947375	1.06665	0.0930886	-0.0729113	0.911456	7844750	7944775	0.98741	-0.0182789	0.192287	0.997544	7844750	5947375	1.31903	0.399474	0.203743	0.0561803
Q9Z0L8-2	Gamma-glutamyl hydrolase	Ggh	4	24087000	23383000	15616000	17605000	16901000	17721000	12456000	13732000	17821000	12785000	16690000	13287000	16154000	19913000	17242000	14884000	20172750	15145750	1.33191	0.413495	-0.0122242	0.0949352	15202500	17048250	0.891734	-0.165315	-0.60305	0.310974	17048250	15145750	1.12561	0.170711	0.0542135	0.343503	15202500	20172750	0.753616	-0.408099	-0.450406	0.081645	15202500	15145750	1.00375	0.00539557	-0.4066	0.980208
P49722	Proteasome subunit alpha type-2	Psma2	4	8431300	8577300	6680300	8828600	8827800	9365500	591593	8145000	6687400	7582800	6456200	6641500	5915300	10220000	6536600	5307200	8129375	6841975	1.18816	0.248732	-0.230659	0.180809	6.73247e+06	6994775	0.9625	-0.055141	-0.370281	0.514073	6994775	6841975	1.02233	0.0318648	-0.17318	0.954013	6.73247e+06	8129375	0.828166	-0.272008	-0.226034	0.343667	6.73247e+06	6841975	0.983996	-0.0232762	-0.451006	0.485428
P17742	Peptidyl-prolyl cis-trans isomerase A;Peptidyl-prolyl cis-trans isomerase A, N-terminally processed	Ppia	4	11818000	9379900	8129400	5089300	5801000	13005000	4333600	10519000	2740500	2286600	5601500	6325000	12128000	9300900	4156600	1928800	8604150	4238400	2.03005	1.02151	0.793856	0.0241059	8414650	6878575	1.22331	0.290794	0.360589	0.462548	6878575	4238400	1.62292	0.69859	0.918743	0.42723	8414650	8604150	0.977976	-0.0321294	0.169451	0.802696	8414650	4238400	1.98534	0.989384	1.11738	0.062944
A0A286YDT5	Adhesion G protein-coupled receptor F5 (Fragment)	Adgrf5	4	4988900	5073000	3279800	4215200	4346200	4110500	4255000	4304700	3087800	2764900	3785400	3769600	4015900	4627100	3288500	3408400	4389225	3351925	1.30946	0.388976	-0.0447294	0.103395	4254100	3834975	1.10929	0.149637	0.0623618	0.261375	3834975	3351925	1.14411	0.194227	0.0927277	0.320551	4254100	4389225	0.969214	-0.0451123	0.148047	0.888534	4254100	3351925	1.26915	0.343864	0.117615	0.0585967
Q9Z2L6	Multiple inositol polyphosphate phosphatase 1	Minpp1	4	8592800	9201400	7153500	6882800	6502700	9054000	6791800	5469200	5409400	4533200	8522200	4341200	7169500	7300700	8312400	5871300	7957625	5701500	1.39571	0.480996	0.0772661	0.0650753	6954425	7163475	0.970817	-0.0427284	-0.344056	0.768049	7163475	5701500	1.25642	0.329318	0.313971	0.159192	6954425	7957625	0.873932	-0.194407	-0.0980936	0.306897	6954425	5701500	1.21975	0.28659	0.0289092	0.261495
Q9R1P1	Proteasome subunit beta type-3	Psmb3	4	18848000	22708000	11938000	16418000	17944000	22581000	5052100	14350000	16480000	17840000	9273400	10887000	16053000	19162000	12994000	11078000	17478000	13620100	1.28325	0.359803	-0.0834063	0.227868	14981775	14821750	1.0108	0.0154928	-0.22105	0.75271	14821750	13620100	1.08823	0.121979	-0.0255971	0.609999	14981775	17478000	0.857179	-0.222332	-0.144133	0.43207	14981775	13620100	1.09998	0.137471	-0.202043	0.993802
Q9R1P3	Proteasome subunit beta type-2	Psmb2	4	18036000	16169000	12007000	15397000	12859000	15612000	4587600	13960000	13514000	12902000	14046000	8296400	14172000	18424000	13173000	9236100	15402250	12189600	1.26356	0.33749	-0.112987	0.160819	11754650	13751275	0.854804	-0.226334	-0.731967	0.450584	13751275	12189600	1.12812	0.173915	0.0594608	0.55249	11754650	15402250	0.763177	-0.38991	-0.420417	0.215075	11754650	12189600	0.964318	-0.0524192	-0.496142	0.690825
Q9WUU7	Cathepsin Z	Ctsz	4	3148800	2585100	2277900	3894200	3111100	2355100	2774000	2462400	2731400	2534300	2833600	2354700	3375800	3277300	3201000	2972200	2976500	2613500	1.13889	0.187634	-0.311659	0.455099	2675650	3206575	0.834426	-0.261144	-0.805511	0.0635299	3206575	2613500	1.22693	0.29505	0.257849	0.0617536	2675650	2976500	0.898925	-0.153727	-0.0310262	0.522745	2675650	2613500	1.02378	0.0339063	-0.362443	0.860823
P05201	Aspartate aminotransferase, cytoplasmic	Got1	4	6724100	4731400	5114000	3473200	4345700	11344000	2369900	4640900	2711900	2760900	5018600	3665900	5159000	7377900	5981900	601777	5010675	3539325	1.41571	0.501531	0.104489	0.101913	5675125	4.78014e+06	1.18723	0.247598	0.269328	0.575069	4.78014e+06	3539325	1.35058	0.43358	0.484725	0.997999	5675125	5010675	1.13261	0.179647	0.518606	0.974305	5675125	3539325	1.60345	0.681178	0.640041	0.305808
Q91Y47	Coagulation factor XI;Coagulation factor XIa heavy chain;Coagulation factor XIa light chain	F11	4	2656800	4380200	2359000	3342100	2816800	2586700	5475000	3936000	6561400	3283500	1333800	4571000	3024500	4709400	3351400	2858000	3184525	3937425	0.808784	-0.306174	-0.966325	0.787376	3703625	3485825	1.06248	0.0874379	-0.0690484	0.85772	3485825	3937425	0.885306	-0.175752	-0.513203	0.976716	3703625	3184525	1.16301	0.21786	0.581606	0.52728	3703625	3937425	0.940621	-0.0883144	-0.551736	0.897788
Q01853	Transitional endoplasmic reticulum ATPase	Vcp	4	1162500	1288300	3225000	733760	655010	4857400	892960	5092000	313390	475176	878460	1942400	1165600	3266800	731956	601777	1602390	902357	1.77578	0.828456	0.53791	0.163226	2.87434e+06	1.44153e+06	1.99395	0.995628	1.84972	0.383844	NA	NA	NA	NA	NA	NA	2.87434e+06	1602390	1.79378	0.843007	1.61228	0.537007	2.87434e+06	902357	3.18537	1.67146	2.17378	0.117946
E9QPK1	Cell growth regulator with EF hand domain protein 1	Cgref1	4	93742000	75212000	64151000	57701000	74026000	61904000	82742000	56477000	67843000	48138000	64006000	84308000	60059000	63689000	96006000	55767000	72701500	66073750	1.10031	0.137908	-0.377583	0.563455	68787250	68880250	0.99865	-0.0019492	-0.2579	0.940388	68880250	66073750	1.04248	0.0600132	-0.12708	0.826219	68787250	72701500	0.94616	-0.079844	0.0907849	0.732093	68787250	66073750	1.04107	0.058064	-0.325028	0.75723
A0A0R4IZW5	Cadherin-1;E-Cad/CTF1;E-Cad/CTF2;E-Cad/CTF3	Cdh1	4	12729000	14352000	8738500	7658000	12276000	13025000	12080000	8041100	9729500	5734700	10714000	6413700	12343000	13157000	8365400	7714500	10869375	8147975	1.334	0.415756	-0.00922696	0.190666	11355525	10394975	1.09241	0.127508	0.0156096	0.567631	10394975	8147975	1.27577	0.351373	0.350091	0.226966	11355525	10869375	1.04473	0.0631254	0.326497	0.744087	11355525	8147975	1.39366	0.478881	0.326727	0.0933786
Q9DC42	CD97 antigen	Adgre5;Cd97	4	5190500	6419300	3878500	5099100	6946500	6596900	5294100	3718400	4852100	2616800	4110800	2920400	5341000	6147600	5199100	3504600	5146850	3625025	1.41981	0.505699	0.110015	0.0710971	5638975	5048075	1.11705	0.1597	0.0836219	0.573069	5048075	3625025	1.39256	0.477742	0.557052	0.0934262	5638975	5146850	1.09562	0.131743	0.439627	0.654796	5638975	3625025	1.55557	0.637442	0.572304	0.0505741
Q07079	Insulin-like growth factor-binding protein 5	Igfbp5	4	6006600	7688400	4806900	5956000	6286200	2646100	5474500	3210200	5730900	4166800	6974400	5658700	7251700	6449000	5570000	4719000	6114475	5632700	1.08553	0.118402	-0.403443	0.598305	4404250	5997425	0.734357	-0.445447	-1.1949	0.124611	5997425	5632700	1.06475	0.0905166	-0.0771236	0.66311	4404250	6114475	0.720299	-0.473332	-0.557956	0.111527	4404250	5632700	0.781907	-0.35493	-0.964667	0.215221
Q60692	Proteasome subunit beta type-6	Psmb6	4	8422400	7371400	3505000	4495000	6020000	4136500	2851800	4351800	5355800	5042000	5222300	3977600	5712900	7335700	4454200	4801000	5948450	4899425	1.21411	0.279901	-0.189336	0.518105	4340025	5575950	0.778347	-0.361514	-1.01757	0.171284	5575950	4899425	1.13808	0.186605	0.0802446	0.424842	4340025	5948450	0.729606	-0.45481	-0.527419	0.252757	4340025	4899425	0.885823	-0.174909	-0.685853	0.402554
O35490	Betaine--homocysteine S-methyltransferase 1	Bhmt	4	1096400	4431300	3187200	478172	661377	676328	982000	1138700	1513400	1065500	1136400	7459400	3143400	1163200	731956	1406800	2.29827e+06	2793675	0.822668	-0.281617	-0.933769	0.798102	NA	NA	NA	NA	NA	NA	1.61134e+06	2793675	0.576781	-0.793904	-1.52558	0.513631	NA	NA	NA	NA	NA	NA	864601	2793675	0.309485	-1.69206	-3.03559	0.0808239
P58252	Elongation factor 2	Eef2	4	1102400	2947000	569554	414110	661377	3877000	607070	1459700	697888	475176	364990	917900	370070	401840	731956	601777	NA	NA	NA	NA	NA	NA	NA	NA	NA	NA	NA	NA	NA	NA	NA	NA	NA	NA	NA	NA	NA	NA	NA	NA	NA	NA	NA	NA	NA	NA
P24549	Retinal dehydrogenase 1;Aldehyde dehydrogenase, cytosolic 1	Aldh1a1	4	4299900	4278600	1595500	478172	2689500	3033700	591593	3550300	697888	475176	425807	3085000	663032	404724	731956	601777	NA	NA	NA	NA	NA	NA	NA	NA	NA	NA	NA	NA	NA	NA	NA	NA	NA	NA	NA	NA	NA	NA	NA	NA	NA	NA	NA	NA	NA	NA
A0A494B908	Glutathione S-transferase P 1;Glutathione S-transferase P 2	Gstp1;Gstp2	4	977408	1063300	569554	478172	648150	676328	2472900	567918	697888	475176	937500	35960000	663032	404724	731956	601777	NA	NA	NA	NA	NA	NA	NA	NA	NA	NA	NA	NA	NA	NA	NA	NA	NA	NA	NA	NA	NA	NA	NA	NA	NA	NA	NA	NA	NA	NA
P11438	Lysosome-associated membrane glycoprotein 1	Lamp1	4	9313200	6084000	4424600	478172	6594100	4904100	591593	4221700	4719000	475176	10144000	3851300	663032	5711300	7181300	6562500	NA	NA	NA	NA	NA	NA	NA	NA	NA	NA	NA	NA	NA	NA	NA	NA	NA	NA	NA	NA	NA	NA	NA	NA	NA	NA	NA	NA	NA	NA
A0A075B5M7	Immunoglobulin kappa variable 5-39	Igkv5-39	3	10936000	77611000	18340000	10215000	52297000	13991000	1373000	5502700	6857000	10052000	5077300	6085700	663032	404724	731956	601777	29275500	7018000	4.17149	2.06056	2.17137	0.032454	18290925	600372	30.466	4.92913	10.1602	0.00458537	600372	7018000	0.0855475	-3.54713	-6.03465	6.51628e-07	18290925	29275500	0.624786	-0.678566	-0.896322	0.312771	18290925	7018000	2.60629	1.382	1.72546	0.730588
Q9Z1R3	Apolipoprotein M	Apom	3	214240000	212720000	182310000	177480000	350210000	371510000	285800000	269830000	290350000	161590000	353670000	208450000	347810000	260180000	475200000	338430000	196687500	253515000	0.775842	-0.366166	-1.04586	0.268338	319337500	355405000	0.898517	-0.154382	-0.579951	0.530649	355405000	253515000	1.40191	0.487393	0.572857	0.107808	319337500	196687500	1.62358	0.699177	1.37515	0.00228913	319337500	253515000	1.25964	0.333011	0.100806	0.187699
Q9Z121	C-C motif chemokine 8	Ccl8	3	3201300	3064200	1540300	2834000	661377	2457600	3838500	567918	5360800	4155700	425807	497180	663032	404724	1994700	601777	2659950	2.60987e+06	1.01919	0.0274203	-0.524062	0.375452	NA	NA	NA	NA	NA	NA	NA	NA	NA	NA	NA	NA	1.88135e+06	2659950	0.707287	-0.499632	-0.601315	0.196003	NA	NA	NA	NA	NA	NA
P35505	Fumarylacetoacetase	Fah	3	5437500	6964600	4538000	4121600	4375700	4842500	3475400	3080500	2939700	3377100	4453400	4039200	3842400	3787200	2847100	2709900	5265425	3702350	1.42218	0.508109	0.11321	0.0582141	3943525	3296650	1.19622	0.258485	0.29233	0.234088	3296650	3702350	0.890421	-0.167441	-0.49959	0.43	3943525	5265425	0.748947	-0.417064	-0.465187	0.100436	3943525	3702350	1.06514	0.0910445	-0.273948	0.698251
O35955	Proteasome subunit beta type-10	Psmb10	3	6241800	5068900	5086400	4787400	4383800	5607000	591593	4520800	4416100	4563400	3557600	3709300	3655100	4757200	3534400	3352900	5296125	4061600	1.30395	0.382889	-0.0527997	0.0570761	3.7758e+06	3824900	0.987163	-0.0186403	-0.293164	0.56113	3824900	4061600	0.941722	-0.0866261	-0.367237	0.609972	3.7758e+06	5296125	0.712936	-0.488155	-0.582394	0.220328	3.7758e+06	4061600	0.929633	-0.105266	-0.577991	0.468234
P27046	Alpha-mannosidase 2	Man2a1	3	2097200	1636000	2066400	1834000	1280300	1829700	1659600	1795400	1117800	940320	1604400	497180	663032	1766800	1123200	1125600	1908400	1039925	1.83513	0.875884	0.600788	0.0169843	1641250	1169658	1.40319	0.488708	0.778732	0.0890134	NA	NA	NA	NA	NA	NA	1641250	1908400	0.860014	-0.217569	-0.13628	0.212687	1641250	1039925	1.57824	0.658316	0.604632	0.0551752
S4R257	Glyceraldehyde-3-phosphate dehydrogenase	Gapdh	3	4986200	2932400	2385900	3188100	661377	4182300	4590300	7260200	3315300	4027700	425807	5815500	663032	3864000	731956	601777	3373150	3.39608e+06	0.993249	-0.00977256	-0.573371	0.572954	NA	NA	NA	NA	NA	NA	NA	NA	NA	NA	NA	NA	4.17354e+06	3373150	1.23728	0.307177	0.728862	0.92469	NA	NA	NA	NA	NA	NA
P70195	Proteasome subunit beta type-7	Psmb7	3	3951600	3806300	2066200	3100100	3032600	3360200	1236300	2830700	2448000	2559700	1882100	2144800	2973200	2233800	1434600	1251100	3231050	2258650	1.43052	0.516542	0.124391	0.0801277	2614950	1973175	1.32525	0.406264	0.60455	0.347102	1973175	2258650	0.873608	-0.194942	-0.54463	0.369308	2614950	3231050	0.809319	-0.30522	-0.28079	0.345114	2614950	2258650	1.15775	0.211323	-0.0876632	0.710325
A0A0R4J0M4	Apolipoprotein F	Apof	3	7790400	9497300	4056800	6597600	7196600	4819200	10071000	6261800	5943600	2486900	7246300	5417100	4867000	3827000	3871900	601777	6985525	5273475	1.32465	0.405615	-0.0226713	0.280826	7087150	3.29192e+06	2.15289	1.10628	2.08349	0.0625369	3.29192e+06	5273475	0.624241	-0.679825	-1.33874	0.198729	7087150	6985525	1.01455	0.020837	0.256777	0.912291	7087150	5273475	1.34392	0.426452	0.245525	0.228162
P68134	Actin, alpha skeletal muscle;Actin, alpha cardiac muscle 1;Actin, aortic smooth muscle;Actin, gamma-enteric smooth muscle	Acta1	3	102930000	130100000	59636000	100190000	97130000	97106000	94942000	77993000	81957000	79817000	54000000	66969000	85946000	73444000	43595000	55281000	98214000	70685750	1.38945	0.474509	0.0686658	0.139479	91792750	64566500	1.42168	0.507594	0.818633	0.0382116	64566500	70685750	0.91343	-0.130634	-0.43931	0.542482	91792750	98214000	0.93462	-0.0975485	0.0615956	0.843825	91792750	70685750	1.2986	0.376961	0.168875	0.070366
A0A338P7C0	Proteasome subunit beta type-1	Psmb1	3	8080100	8798300	4353700	7169200	7841700	7861500	2441800	7579300	5630700	7976400	3975900	4052000	6178300	5938700	3201700	3316000	7100325	5408750	1.31275	0.39259	-0.0399389	0.224233	6431075	4658675	1.38045	0.46514	0.728939	0.403976	4658675	5408750	0.861322	-0.215376	-0.578095	0.505903	6431075	7100325	0.905744	-0.142825	-0.0130516	0.586732	6431075	5408750	1.18901	0.249765	-0.0281247	0.710954
P09103	Protein disulfide-isomerase	P4hb	3	1490400	1204200	1106500	1511100	1293400	1357600	929220	1113000	1039100	825530	1020500	884480	663032	894230	1192200	1222700	1328050	942402	1.40922	0.494894	0.0956911	0.0263445	1173305	993040	1.18153	0.240654	0.254657	0.277139	993040	942402	1.05373	0.0755092	-0.101702	0.864317	1173305	1328050	0.88348	-0.178731	-0.0722498	0.343723	1173305	942402	1.24501	0.316163	0.0747116	0.126814
P34928	Apolipoprotein C-I;Truncated apolipoprotein C-I	Apoc1	3	3942300000	3594700000	2990000000	3674000000	2933300000	2425900000	2408000000	2412200000	2416200000	782840000	2121400000	1262000000	2517000000	2135200000	3564800000	3090600000	3550250000	1645610000	2.15741	1.1093	0.910237	0.00682419	2544850000	2826900000	0.900226	-0.15164	-0.574159	0.490032	2826900000	1645610000	1.71784	0.780598	1.05305	0.0399463	2544850000	3550250000	0.716809	-0.48034	-0.569509	0.0105038	2544850000	1645610000	1.54645	0.628958	0.559164	0.0598874
P10923	Osteopontin	Spp1	3	2810100	2692400	2334000	3117900	1843500	2277900	2326400	2339200	2606600	1973600	3326600	1617000	2272600	2830100	1312200	1889700	2738600	2380950	1.15021	0.201901	-0.292744	0.344385	2196750	2076150	1.05809	0.08146	-0.0816781	0.597188	2076150	2380950	0.871984	-0.197627	-0.549027	0.5295	2196750	2738600	0.802143	-0.318068	-0.301973	0.0667444	2196750	2380950	0.922636	-0.116167	-0.594873	0.784315
E9PZ16	Basement membrane-specific heparan sulfate proteoglycan core protein;Endorepellin;LG3 peptide	Hspg2	3	1297100	956630	698490	969720	661377	845200	697830	694180	673430	621750	772790	497180	856880	779040	731956	601777	980485	641288	1.52893	0.612524	0.251639	0.0334632	NA	NA	NA	NA	NA	NA	NA	NA	NA	NA	NA	NA	724647	980485	0.73907	-0.436218	-0.496765	0.0782971	NA	NA	NA	NA	NA	NA
Q62087	Serum paraoxonase/lactonase 3	Pon3	3	6519000	6485500	5574700	6333600	3847400	5023600	4376600	567918	2784200	2817100	4916100	3030700	5904000	4136300	6450500	3055800	6228200	3387025	1.83884	0.878797	0.60465	0.00268214	3.45388e+06	4886650	0.706799	-0.500628	-1.31148	0.264265	4886650	3387025	1.44276	0.528827	0.640715	0.118971	3.45388e+06	6228200	0.554555	-0.850598	-1.17995	0.0929037	3.45388e+06	3387025	1.01974	0.0281991	-0.371282	0.642096
F7ABZ6	Dynein, axonemal, heavy chain 10	Dnah10	3	977408	163190000	91690000	284580000	137110000	255040000	493570000	396870000	391960000	570160000	466360000	525380000	322690000	276480000	204990000	425770000	1.35109e+08	488465000	0.2766	-1.85413	-3.01852	0.059351	320647500	307482500	1.04282	0.0604839	-0.125995	0.914233	307482500	488465000	0.629487	-0.667751	-1.31897	0.0196266	320647500	1.35109e+08	2.37324	1.24686	2.27811	0.14532	320647500	488465000	0.656439	-0.607267	-1.35548	0.0851078
O35664-3	Interferon alpha/beta receptor 2	Ifnar2	3	117900000	121130000	60668000	85141000	98594000	105600000	70701000	67455000	62743000	50696000	76074000	44032000	89418000	63428000	71082000	63981000	96209750	58386250	1.64782	0.720554	0.39486	0.0362477	85587500	71977250	1.18909	0.249859	0.274106	0.266236	71977250	58386250	1.23278	0.301912	0.269088	0.17497	85587500	96209750	0.889593	-0.168783	-0.055848	0.610743	85587500	58386250	1.46588	0.551771	0.439618	0.0495032
P15327	Bisphosphoglycerate mutase;Phosphoglycerate mutase	Bpgm	3	19561000	10200000	4278700	2602600	4176500	20102000	4803200	22347000	598390	409850	956070	1737600	7427200	5459100	1572800	1330300	9160575	925478	9.89821	3.30717	3.82406	0.00144703	12857175	3947350	3.25717	1.70362	3.34552	0.0680912	3947350	925478	4.2652	2.09261	3.20179	0.0187605	12857175	9160575	1.40353	0.489064	1.02874	0.544532	12857175	925478	13.8925	3.79623	5.46459	0.000662215
P26339	Chromogranin-A;Pancreastatin;Beta-granin;WE-14;Catestatin;GE-25;Serpinin-RRG;Serpinin;p-Glu serpinin precursor	Chga	3	2063100	1532000	1665400	1744300	1851900	1793200	591593	567918	2879900	1829500	3311200	1907700	1856900	404724	1524500	1410600	1751200	2482075	0.705539	-0.503203	-1.22754	0.0864623	NA	NA	NA	NA	NA	NA	1.29918e+06	2482075	0.523425	-0.933944	-1.75492	0.0495224	1.20115e+06	1751200	0.685903	-0.543924	-0.67434	0.116775	1.20115e+06	2482075	0.483931	-1.04713	-2.03673	0.0286196
Q8BSB7	Tissue factor pathway inhibitor	Tfpi	3	14466000	17544000	12986000	16948000	15608000	13278000	12672000	13499000	14719000	12294000	20027000	12568000	19093000	14637000	18886000	19319000	15486000	14902000	1.03919	0.0554586	-0.486891	0.738562	13764250	17983750	0.765372	-0.385768	-1.06881	0.0231083	17983750	14902000	1.2068	0.271188	0.218769	0.186558	13764250	15486000	0.888819	-0.170039	-0.0579181	0.306386	13764250	14902000	0.923651	-0.11458	-0.592416	0.660062
P28063	Proteasome subunit beta type-8;Proteasome subunit beta type	Psmb8	3	6784800	4271900	3625300	4489900	3969100	4396300	591593	4917800	2831000	3677500	4226700	2847500	4874900	4350200	3092900	2719400	4792975	3395675	1.41149	0.497223	0.0987786	0.0843127	3.4687e+06	3759350	0.922686	-0.116089	-0.499048	0.516336	3759350	3395675	1.1071	0.146785	0.0150293	0.611451	3.4687e+06	4792975	0.723705	-0.466527	-0.546736	0.256139	3.4687e+06	3395675	1.0215	0.030696	-0.367415	0.625663
A0A0A6YW67	Ubiquitin-60S ribosomal protein L40;Ubiquitin;60S ribosomal protein L40;Ubiquitin-40S ribosomal protein S27a;Ubiquitin;40S ribosomal protein S27a;Polyubiquitin-B;Ubiquitin;Polyubiquitin-C;Ubiquitin;Ubiquitin-related 1;Ubiquitin-related 2	Gm8797;Uba52;Kxd1;Ubc;Ubb;Rps27a	3	11915000	7938300	5375100	3347600	3810000	10348000	5834000	15111000	2460700	475176	425807	4706400	5209400	8533700	731956	3680600	7144000	2.01702e+06	3.54186	1.82451	1.85842	0.0170842	8775750	4.53891e+06	1.93345	0.951175	1.75581	0.158773	NA	NA	NA	NA	NA	NA	8775750	7144000	1.22841	0.29679	0.711738	0.633027	8775750	2.01702e+06	4.35085	2.1213	2.87047	0.0128565
A0A1W2P6Q2	ICOS ligand	Icoslg	3	12371000	13313000	8433400	8313900	9626600	11012000	8413600	8355800	6780300	8301900	10295000	4618000	9037800	10192000	9209000	6685600	10607825	7498800	1.4146	0.500397	0.102987	0.105	9352000	8781100	1.06501	0.0908733	-0.0617903	0.57241	8781100	7498800	1.171	0.227742	0.147616	0.337464	9352000	10607825	0.881613	-0.181782	-0.0772795	0.464311	9352000	7498800	1.24713	0.318615	0.0785098	0.191008
O55234	Proteasome subunit beta type-5	Psmb5	3	2404900	2180100	1649100	1905100	2650600	2003900	591593	1812200	1986100	1844100	425807	1156300	1998100	1881100	1507900	1749400	2034800	1.35308e+06	1.50383	0.588643	0.219979	0.119188	1.76457e+06	1784125	0.989041	-0.0158973	-0.287369	0.656975	1784125	1.35308e+06	1.31857	0.398973	0.428048	0.212669	1.76457e+06	2034800	0.867197	-0.205568	-0.116495	0.405714	NA	NA	NA	NA	NA	NA
G5E8M9	Intercellular adhesion molecule 2	Icam2	3	3892600	5225000	2589600	2739200	3559800	3902100	2099200	3285500	2501200	2113600	2791400	2097100	3039300	3766200	3013600	2069300	3611600	2375825	1.52015	0.60421	0.240616	0.0604063	3211650	2972100	1.0806	0.111832	-0.0175099	0.683708	2972100	2375825	1.25098	0.323054	0.303712	0.193913	3211650	3611600	0.88926	-0.169323	-0.0567391	0.621322	3211650	2375825	1.3518	0.434886	0.258588	0.112847
A0A1B0GR11	Transaldolase	Taldo1	3	1762800	1287400	569554	970260	1103000	1501500	1115500	1613500	809310	475176	425807	1276600	866450	1338700	722670	779130	NA	NA	NA	NA	NA	NA	1333375	926738	1.43878	0.52485	0.85509	0.0468856	926738	746723	1.24107	0.311587	0.284932	0.302001	1333375	1.1475e+06	1.16198	0.216584	0.579503	0.385777	1333375	746723	1.78563	0.836437	0.880504	0.0274568
P62897	Cytochrome c, somatic	Cycs	3	16132000	19534000	11381000	10961000	21456000	15991000	10073000	9050300	16805000	12451000	12423000	9805300	13738000	15763000	12321000	9766100	14502000	12871075	1.12671	0.172119	-0.332228	0.55874	14142575	12897025	1.09658	0.133007	0.0272263	0.831202	12897025	12871075	1.00202	0.00290576	-0.220607	0.972033	14142575	14502000	0.975215	-0.0362071	0.162729	0.805467	14142575	12871075	1.09879	0.135912	-0.204458	0.817992
Q3TCF3	L-selectin	Sell	3	28375000	30686000	22077000	22852000	25501000	31731000	25203000	22637000	17278000	21638000	27137000	15012000	32016000	34835000	24971000	21272000	25997500	20266250	1.2828	0.359294	-0.0840812	0.13612	26268000	28273500	0.929068	-0.106144	-0.478037	0.650493	28273500	20266250	1.3951	0.480371	0.561357	0.0778931	26268000	25997500	1.0104	0.0149335	0.247044	0.919653	26268000	20266250	1.29615	0.374227	0.164641	0.110361
Q9DBJ1	Phosphoglycerate mutase 1	Pgam1	3	6830200	4135500	5994300	5166700	3379700	6297100	3659800	5674700	3524300	3499500	5101000	4284800	5454200	6640700	4931400	3460400	5531675	4102400	1.3484	0.431248	0.0113125	0.0877713	4752825	5121675	0.927983	-0.10783	-0.4816	0.673506	5121675	4102400	1.24846	0.320148	0.298952	0.236635	4752825	5531675	0.859202	-0.218931	-0.138527	0.369552	4752825	4102400	1.15855	0.212317	-0.086123	0.505485
D3Z7M4	Insulin-like growth factor I	Igf1	3	28018000	28165000	24343000	19370000	34821000	20247000	25776000	12878000	25865000	13198000	28836000	20434000	25351000	24294000	20297000	23806000	24974000	22083250	1.1309	0.177474	-0.325128	0.439222	23430500	23437000	0.999723	-0.000400171	-0.254627	0.770438	23437000	22083250	1.0613	0.0858354	-0.0847901	0.589809	23430500	24974000	0.938196	-0.0920392	0.0706788	0.596381	23430500	22083250	1.06101	0.0854352	-0.282636	0.882617
Q4LDF6	Complement factor H-related 2	Cfhr2	3	15430000	12054000	10826000	11108000	12873000	10400000	13985000	10157000	14417000	8209600	12596000	11548000	12952000	9378400	11776000	12524000	12354500	11692650	1.0566	0.0794347	-0.455104	0.68457	11853750	11657600	1.01683	0.0240727	-0.202923	0.897806	11657600	11692650	0.997002	-0.00433113	-0.232459	0.947496	11853750	12354500	0.959468	-0.0596931	0.124007	0.750197	11853750	11692650	1.01378	0.0197416	-0.384381	0.874125
A0A140LIV1	Sperm flagellar protein 2	Spef2	3	217890000	367680000	314010000	289920000	89451000	276490000	303030000	320340000	99567000	128980000	286930000	222390000	248800000	265930000	342220000	252750000	297375000	184466750	1.61208	0.688923	0.352924	0.0527431	247327750	277425000	0.891512	-0.165674	-0.603808	0.461944	277425000	184466750	1.50393	0.588737	0.738832	0.0672387	247327750	297375000	0.831703	-0.265859	-0.215897	0.363323	247327750	184466750	1.34077	0.423063	0.240277	0.454701
O35744	Chitinase-like protein 3	Chil3	3	4161000	4693300	4315400	3256500	4120200	4837800	4629700	5573900	6952400	3995100	5481200	4642600	3583000	5241800	3990100	3041800	4106550	5267825	0.779553	-0.359281	-1.03673	0.160889	4790400	3964175	1.20842	0.273125	0.323261	0.156567	3964175	5267825	0.752526	-0.410187	-0.897146	0.12048	4790400	4106550	1.16653	0.222219	0.588794	0.207689	4790400	5267825	0.90937	-0.137061	-0.627235	0.600152
E9QP56	Apolipoprotein C-III	Apoc3	3	1824600000	1644200000	1262100000	1473000000	1502000000	1926500000	1523800000	1612400000	1112000000	316010000	1188500000	721340000	1485900000	1282900000	1884400000	1356700000	1550975000	834462500	1.85865	0.894256	0.625145	0.02991	1641175000	1502475000	1.09231	0.127388	0.0153561	0.411722	1502475000	834462500	1.80053	0.848422	1.16413	0.03692	1641175000	1550975000	1.05816	0.0815537	0.35688	0.605082	1641175000	834462500	1.96675	0.97581	1.09636	0.0211663
Q09200	Beta-1,4 N-acetylgalactosaminyltransferase 1	B4galnt1	3	2973100	4357800	2978400	2530500	3572400	2960400	2833000	2599500	2538100	1918900	2833300	2455000	2442900	3264100	3330900	3637700	3209950	2436325	1.31754	0.397844	-0.0329729	0.120812	2991325	3168900	0.943963	-0.0831975	-0.429557	0.649618	3168900	2436325	1.30069	0.379276	0.395789	0.0817495	2991325	3209950	0.931891	-0.101766	0.054642	0.69174	2991325	2436325	1.2278	0.296078	0.0436047	0.141425
P01837	Immunoglobulinkappa chain C region	Igkc	3	5944400	12824000	3809600	478172	2544600	676328	591593	567918	3383000	3033700	3789500	4399300	663032	404724	731956	601777	5.76404e+06	3651375	1.5786	0.658641	0.312779	0.932644	NA	NA	NA	NA	NA	NA	600372	3651375	0.164424	-2.60451	-4.49088	1.6689e-06	NA	NA	NA	NA	NA	NA	1.09511e+06	3651375	0.299917	-1.73736	-3.10576	0.00216769
P23492	Purine nucleoside phosphorylase	Pnp	3	5023200	9657000	1386000	478172	2138700	12737000	3619400	14553000	697888	475176	425807	2223200	2559700	2136500	731956	601777	NA	NA	NA	NA	NA	NA	8262025	1.50748e+06	5.48067	2.45435	4.93163	0.0168307	NA	NA	NA	NA	NA	NA	8262025	4.13609e+06	1.99754	0.998227	1.86819	0.21794	8262025	955518	8.64665	3.11214	4.40508	0.00345571
Q9QX15	Calcium-activated chloride channel regulator 3A-1	Clca3a1	3	977408	816550	1488300	1824800	2427900	1625100	1250700	2016700	1832400	1597800	1629700	2004400	663032	404724	731956	601777	1.27676e+06	1766075	0.722939	-0.468054	-1.18094	0.0820886	1830100	600372	3.04828	1.60799	3.14349	0.00030035	600372	1766075	0.339947	-1.55662	-2.7747	5.36664e-05	1830100	1.27676e+06	1.43339	0.51943	1.0788	0.114445	1830100	1766075	1.03625	0.0513759	-0.335386	0.951379
P50247	Adenosylhomocysteinase	Ahcy	3	977408	1248700	1056700	1365700	922110	1530400	1203000	1535800	697888	1119500	425807	7766900	663032	1085600	731956	601777	NA	NA	NA	NA	NA	NA	1.29783e+06	770591	1.6842	0.752061	1.33513	0.0140172	NA	NA	NA	NA	NA	NA	1.29783e+06	1.16213e+06	1.11677	0.159331	0.48511	0.516825	1.29783e+06	2.50252e+06	0.518607	-0.947285	-1.8821	0.996867
Q07235	Glia-derived nexin	Serpine2	3	977408	2038200	4235300	2707300	661377	5463200	591593	567918	697888	475176	1395900	2326000	1809500	3295900	731956	601777	NA	NA	NA	NA	NA	NA	NA	NA	NA	NA	NA	NA	NA	NA	NA	NA	NA	NA	NA	NA	NA	NA	NA	NA	NA	NA	NA	NA	NA	NA
A0A075B5V1	Immunoglobulinheavy chain V region J558;Immunoglobulinheavy chain V region MOPC 104E;Immunoglobulinheavy chain V region AC38 205.12	Ighv1-31	2	2746100	3588600	1378500	2804300	661377	676328	591593	567918	4000600	2697200	1605400	2254400	663032	404724	731956	601777	2629375	2639400	0.996202	-0.00549009	-0.567693	0.981043	NA	NA	NA	NA	NA	NA	600372	2639400	0.227465	-2.13628	-3.72404	0.000107864	624304	2629375	0.237434	-2.0744	-3.19762	0.000101928	624304	2639400	0.236533	-2.07989	-3.63625	6.50496e-05
E1AZ71	Cyclic nucleotide-gated channel beta 1	Cngb1	2	27083000	26995000	5409400	9930000	7532800	12659000	9549700	7457000	7803300	6389900	3800300	4869700	4160000	4512300	3751800	5007300	17354350	5715800	3.03621	1.60227	1.56379	0.0330922	9299625	4357850	2.13399	1.09356	2.05662	0.000686443	4357850	5715800	0.762422	-0.391339	-0.866278	0.184841	9299625	17354350	0.535867	-0.900053	-1.26149	0.265225	9299625	5715800	1.627	0.702217	0.672626	0.0314959
Q99JC1	Immunoglobulinlambda-3 chain C region;Immunoglobulinlambda-2 chain C region	Iglc3	2	4696000	2874200	1650200	1665500	2317800	1524500	1176900	567918	2256000	1584600	987510	1317800	837890	404724	1384300	1082100	2721475	1.53648e+06	1.77124	0.824762	0.533014	0.0910187	NA	NA	NA	NA	NA	NA	927253	1.53648e+06	0.603493	-0.728591	-1.41861	0.0829587	1.39678e+06	2721475	0.513244	-0.962284	-1.36409	0.0788886	1.39678e+06	1.53648e+06	0.909079	-0.137522	-0.627949	0.592742
P32848	Parvalbumin alpha	Pvalb	2	3613800	816550	2507600	478172	2469500	2810900	591593	3383900	2437900	1812300	425807	2927500	6989900	11809000	3289900	4157200	NA	NA	NA	NA	NA	NA	2.31397e+06	6561500	0.352659	-1.50365	-3.43061	0.0358593	6561500	1.90088e+06	3.45183	1.78736	2.70187	0.0172445	NA	NA	NA	NA	NA	NA	NA	NA	NA	NA	NA	NA
P14211	Calreticulin	Calr	2	1253400	788130	748960	1292600	698920	653100	591593	736560	697888	537920	425807	502630	651180	404724	731956	601777	1.02077e+06	541061	1.88661	0.915797	0.653704	0.00761198	NA	NA	NA	NA	NA	NA	NA	NA	NA	NA	NA	NA	670043	1.02077e+06	0.656408	-0.607335	-0.778885	0.0326328	NA	NA	NA	NA	NA	NA
Q5MJS3	Extracellular serine/threonine protein kinase FAM20C;Protein FAM20A	Fam20c	2	2057400	3758200	3706100	3053100	661377	4555600	2863400	2444600	2592300	2185900	3046000	2431600	663032	404724	1762300	2729500	3143700	2563950	1.22612	0.294095	-0.170518	0.291829	NA	NA	NA	NA	NA	NA	1.38989e+06	2563950	0.542089	-0.883399	-1.67214	0.0518277	2.63124e+06	3143700	0.83699	-0.256718	-0.200826	0.381316	2.63124e+06	2563950	1.02625	0.0373771	-0.357067	0.651946
A0A1D5RLM8	Predicted gene 11639	Gm11639	2	42721000	33110000	38352000	48349000	44490000	40260000	38030000	52320000	49511000	52990000	81134000	61809000	43665000	72846000	128850000	61670000	40633000	61361000	0.662196	-0.59467	-1.3488	0.0259581	43775000	76757750	0.570301	-0.810205	-1.96554	0.0540416	76757750	61361000	1.25092	0.32299	0.303608	0.49521	43775000	40633000	1.07733	0.107455	0.399583	0.536666	43775000	61361000	0.713401	-0.487215	-1.16955	0.0507382
F6XLV1	Ciliary rootlet coiled-coil, rootletin family member 2	Crocc2	2	977408	816550	3467200	6822900	661377	4335200	5524900	6187100	4465000	3093500	6396400	4985700	6783300	5823400	8871000	5615900	3.02101e+06	4735150	0.637998	-0.648377	-1.42	0.119115	4.17714e+06	6773400	0.616698	-0.697363	-1.72713	0.152576	6773400	4735150	1.43045	0.51647	0.620478	0.0660172	NA	NA	NA	NA	NA	NA	4.17714e+06	4735150	0.882157	-0.180893	-0.695121	0.449245
P26645	Myristoylated alanine-rich C-kinase substrate	Marcks	2	1238300	1093400	833030	1100200	907180	831830	657270	689460	441230	445650	987340	492920	824750	820390	741630	869010	1.06623e+06	591785	1.80172	0.849377	0.565647	0.0118221	771435	813945	0.947773	-0.0773867	-0.41728	0.543049	813945	591785	1.37541	0.459858	0.527762	0.074786	771435	1.06623e+06	0.723515	-0.466906	-0.54736	0.0308921	771435	591785	1.30357	0.382471	0.177409	0.145765
D3Z6T3	Cathepsin E	Ctse	2	36314000	53990000	28777000	39375000	37632000	30940000	20033000	19006000	697888	25975000	38462000	17404000	663032	37213000	731956	25002000	39614000	2.06347e+07	1.91977	0.940936	0.687031	0.131341	26902750	1.59025e+07	1.69173	0.7585	1.34873	0.115206	NA	NA	NA	NA	NA	NA	26902750	39614000	0.679122	-0.558257	-0.69797	0.0749858	26902750	2.06347e+07	1.30376	0.38268	0.177732	0.291099
P26039	Talin-1	Tln1	2	2539800	2815500	2153400	2289600	2416400	2569400	2224600	2139500	1593400	656920	2415400	1975300	1835800	2463300	1598900	1820700	2449575	1660255	1.47542	0.561127	0.183499	0.0985076	2337475	1929675	1.21133	0.276593	0.330587	0.0973773	1929675	1660255	1.16228	0.216953	0.129947	0.392203	2337475	2449575	0.954237	-0.0675805	0.111004	0.662766	2337475	1660255	1.4079	0.493546	0.34944	0.127555
O88200	C-type lectin domain family 11 member A	Clec11a	2	1401000	2051400	1120900	1587300	3033600	1542500	2508500	2290700	1767200	2520500	2119600	1303500	1652500	2067100	2124400	2270200	1540150	1927700	0.798957	-0.32381	-0.989705	0.26933	2343825	2028550	1.15542	0.208416	0.186547	0.443623	2028550	1927700	1.05232	0.0735683	-0.10488	0.65624	2343825	1540150	1.52182	0.605794	1.22119	0.0502754	2343825	1927700	1.21587	0.281984	0.0217765	0.339917
P11499	Heat shock protein HSP 90-beta	Hsp90ab1	2	4217900	5335100	4102200	4784100	661377	676328	591593	4448000	4497400	4321900	425807	4375300	663032	4754800	4402100	601777	4609825	3.4051e+06	1.3538	0.437014	0.0189566	0.244281	NA	NA	NA	NA	NA	NA	NA	NA	NA	NA	NA	NA	1.59432e+06	4609825	0.345854	-1.53177	-2.30299	0.008434	NA	NA	NA	NA	NA	NA
O08689	Growth/differentiation factor 8	Mstn	2	928840	840650	526130	630630	1594000	697770	584640	687840	1279400	1513600	962390	501440	909540	1027600	730760	1547700	731562	1.06421e+06	0.687425	-0.540726	-1.27728	0.234072	891062	1053900	0.845491	-0.242139	-0.76536	0.414058	1053900	1.06421e+06	0.990314	-0.0140415	-0.248363	0.908303	891062	731562	1.21803	0.284546	0.69155	0.580909	891062	1.06421e+06	0.837301	-0.256181	-0.811725	0.55092
Q61598-2	Rab GDP dissociation inhibitor beta	Gdi2	2	2065600	1371000	1533100	1389500	677750	2825100	1343800	2487600	697888	475176	425807	1109000	1353500	1756300	731956	601777	1589800	676968	2.34841	1.23169	1.07249	0.00281065	1.83356e+06	1.11088e+06	1.65054	0.722942	1.27361	0.253796	NA	NA	NA	NA	NA	NA	1.83356e+06	1589800	1.15333	0.205804	0.56173	0.962307	1.83356e+06	676968	2.70849	1.43749	1.81141	0.0268857
Q3LFS7	Carcinoembryonic antigen-related cell adhesion molecule 1	Ceacam1	2	9443800	10138000	5905200	7208600	7519300	7000500	5710000	6532200	4801200	4983400	5798900	5066700	8412900	4976800	5696800	5218500	8173900	5162550	1.58331	0.662941	0.318479	0.0161121	6690500	6076250	1.10109	0.138933	0.039747	0.413456	6076250	5162550	1.17699	0.235097	0.159662	0.32647	6690500	8173900	0.81852	-0.288911	-0.253901	0.230219	6690500	5162550	1.29597	0.37403	0.164336	0.0458044
Q8CF98	Collectin-10	Colec10	2	8018700	7477300	5315200	4197700	5782300	5635800	6125400	4435200	4682400	475176	4619600	497180	4090300	3399300	4809300	5657000	6252225	2.56859e+06	2.43411	1.28339	1.14104	0.0379223	5494675	4488975	1.22404	0.291648	0.362395	0.141055	4488975	2.56859e+06	1.74764	0.80541	1.09369	0.0917119	5494675	6252225	0.878835	-0.186336	-0.0847868	0.543292	5494675	2.56859e+06	2.13918	1.09706	1.28415	0.0507352
E9Q2T3	Tenascin XB	Tnxb	2	4941200000	4898800000	5134300000	4131000000	9057800000	5440600000	5704300000	4394200000	4664900000	4060700000	5432800000	4995700000	5209200000	5651100000	5614500000	5593400000	4776325000	4788525000	0.997452	-0.00368033	-0.565294	0.99771	6149225000	5517050000	1.11459	0.156508	0.0768779	0.637893	5517050000	4788525000	1.15214	0.204316	0.10925	0.185916	6149225000	4776325000	1.28744	0.364504	0.823377	0.199332	6149225000	4788525000	1.28416	0.360823	0.143881	0.223428
P17047-3	Lysosome-associated membrane glycoprotein 2	Lamp2	2	26201000	27318000	16550000	20801000	18822000	25643000	16934000	14542000	10606000	11339000	15412000	10470000	19462000	21600000	16644000	8760700	22717500	11956750	1.89997	0.925979	0.667201	0.00321621	18985250	16616675	1.14254	0.192247	0.152387	0.464441	16616675	11956750	1.38973	0.474806	0.552243	0.199027	18985250	22717500	0.83571	-0.258925	-0.204464	0.293726	18985250	11956750	1.58783	0.667054	0.618166	0.0194259
Q2VLH6	Scavenger receptor cysteine-rich type 1 protein M130;Soluble CD163	Cd163	2	5675500	7036000	5311800	6346700	5075500	4645900	5578100	6368400	4685600	3028200	3970700	3755100	6254300	4829100	5058000	4482400	6092500	3859900	1.57841	0.658471	0.312553	0.00777832	5416975	5155950	1.05063	0.0712492	-0.103251	0.647598	5155950	3859900	1.33577	0.417675	0.458677	0.0520343	5416975	6092500	0.889122	-0.169547	-0.0571075	0.308496	5416975	3859900	1.4034	0.488924	0.342281	0.0303327
Q99LJ1	Tissue alpha-L-fucosidase	Fuca1	2	4300300	6579400	3207600	3110600	3709300	3141700	3509900	2834900	3414300	2417900	3863300	3330600	3755200	404724	3302700	2807600	4299475	3256525	1.32026	0.400827	-0.0290182	0.241211	3298950	2.56756e+06	1.28486	0.361611	0.510209	0.293121	2.56756e+06	3256525	0.788434	-0.342938	-0.787009	0.302857	3298950	4299475	0.767291	-0.382154	-0.40763	0.240267	3298950	3256525	1.01303	0.0186736	-0.386035	0.87434
P08905	Lysozyme C-2;Lysozyme C-1	Lyz2	2	13932000	11211000	12337000	6333200	661377	24867000	6743200	7297200	8858400	6797700	11787000	6590100	13951000	15783000	731956	601777	10953300	8508300	1.28737	0.364423	-0.0772813	0.282509	NA	NA	NA	NA	NA	NA	7.76693e+06	8508300	0.912865	-0.131526	-0.440771	0.243498	9.89219e+06	10953300	0.903125	-0.147003	-0.0199397	0.343729	9.89219e+06	8508300	1.16265	0.21742	-0.0782202	0.524339
Q9D1B1	Cystatin E/M	Cst6	2	7332600	11853000	6592100	6187100	7571000	7614800	591593	567918	7515700	5941100	425807	497180	5356100	7213700	731956	6472800	7991200	3.59495e+06	2.2229	1.15244	0.967435	0.0545782	NA	NA	NA	NA	NA	NA	NA	NA	NA	NA	NA	NA	4.08633e+06	7991200	0.511353	-0.967607	-1.37286	0.0825845	NA	NA	NA	NA	NA	NA
A0A0G2JE99	Immunoglobulinlambda-1 chain C region	Iglc1	2	6192100	3283200	5631000	9255500	1956300	2758000	2428000	3346200	4211900	3667100	4141000	1995500	2484500	3711400	7090900	3574600	6090450	3503875	1.7382	0.797598	0.497	0.0660217	2622125	4215350	0.622042	-0.684916	-1.70083	0.0993608	4215350	3503875	1.20305	0.266701	0.211421	0.564585	2622125	6090450	0.430531	-1.21581	-1.78208	0.00690263	2622125	3503875	0.74835	-0.418215	-1.06268	0.216655
Q9DB76	ER membrane protein complex subunit 9	Emc9	2	9743200	10025000	7037500	8092100	12912000	11176000	5510100	6742100	5604800	3546700	5763800	2200000	11079000	5497600	7217900	3623200	8724450	4278825	2.03898	1.02785	0.802257	0.00788413	9085050	6854425	1.32543	0.406459	0.60496	0.308532	6854425	4278825	1.60194	0.679821	0.888004	0.147869	9085050	8724450	1.04133	0.0584303	0.318756	0.964863	9085050	4278825	2.12326	1.08628	1.26746	0.0227263
A0A286YDL1	Protein-tyrosine-phosphatase;Receptor-type tyrosine-protein phosphatase mu	Ptprm	2	3952000	4217600	2272300	2958100	3020500	3799200	2975700	2528100	3352600	2070300	3790800	1924500	2893000	404724	3932800	1980300	3350000	2784550	1.20307	0.266717	-0.206815	0.369389	3080875	2.30271e+06	1.33794	0.42001	0.63359	0.251046	2.30271e+06	2784550	0.826958	-0.274114	-0.674294	0.376413	3080875	3350000	0.919664	-0.120821	0.0232265	0.696325	3080875	2784550	1.10642	0.145896	-0.188995	0.490502
Q3V2T4-2	Keratinocyte differentiation-associated protein	Krtdap	2	8445200	7404000	3583700	6432200	9787000	8343600	4596700	7344800	3564500	2113900	5073900	3736300	6153100	3338000	4409500	5258900	6466275	3622150	1.7852	0.836089	0.54803	0.0406488	7518025	4789875	1.56957	0.650366	1.12027	0.0535131	4789875	3622150	1.32238	0.403142	0.434875	0.184011	7518025	6466275	1.16265	0.217419	0.580879	0.496793	7518025	3622150	2.07557	1.05351	1.2167	0.0107811
H3BK72	Neuralized-like protein 4	Neurl4	2	18225000	15187000	20925000	17950000	19770000	17452000	21101000	19946000	41537000	16956000	21588000	27390000	26741000	32459000	18715000	15480000	18071750	26867750	0.672619	-0.572139	-1.31893	0.110702	19567250	23348750	0.838043	-0.254904	-0.792329	0.425548	23348750	26867750	0.869025	-0.20253	-0.557058	0.59989	19567250	18071750	1.08275	0.114705	0.411536	0.428812	19567250	26867750	0.72828	-0.457434	-1.12342	0.199702
P29621	Serine protease inhibitor A3C	Serpina3c	2	11237000	14396000	9144200	10610000	12414000	12180000	8417700	9900000	7510300	8110000	13173000	6729900	11502000	12400000	15127000	13214000	11346800	8880800	1.27768	0.353524	-0.0917305	0.166808	10727925	13060750	0.821387	-0.283867	-0.853519	0.111371	13060750	8880800	1.47067	0.556476	0.685997	0.0301534	10727925	11346800	0.945458	-0.0809144	0.08902	0.697968	10727925	8880800	1.20799	0.27261	0.00725693	0.256857
P97797-2	Tyrosine-protein phosphatase non-receptor type substrate 1	Sirpa	2	4758100	4802200	2901800	4365400	661377	3033800	4131700	3708700	3440800	3359000	4394500	2377100	3730800	2746400	4573100	2851100	4206875	3392850	1.23992	0.310251	-0.149099	0.244974	2.88389e+06	3475350	0.829814	-0.26914	-0.822405	0.379751	3475350	3392850	1.02432	0.0346606	-0.168601	0.885584	2.88389e+06	4206875	0.685519	-0.544731	-0.675669	0.188847	2.88389e+06	3392850	0.849992	-0.234479	-0.778114	0.405273
A0A0J9YV87	Platelet-derived growth factor receptor alpha	Pdgfra	2	2453600	2198700	1744400	478172	2139800	2026800	1943400	1718200	2194900	3675000	2304400	2040100	1991600	2378800	2268100	1858700	1.71872e+06	2553600	0.673057	-0.5712	-1.31768	0.162778	1957050	2124300	0.921268	-0.118307	-0.503734	0.395388	2124300	2553600	0.831884	-0.265545	-0.66026	0.314074	1957050	1.71872e+06	1.13867	0.187348	0.531301	0.41095	1957050	2553600	0.766389	-0.383852	-1.00946	0.147182
Q8C7M3-3	Isoform 3 of E3 ubiquitin-protein ligase TRIM9	Trim9	2	3735800	2307100	2374700	2868300	3921800	2300200	2671600	2394200	2488000	2265200	2776600	1782600	2273200	3269300	2831800	601777	2821475	2328100	1.21192	0.277297	-0.192789	0.265802	2821950	2.24402e+06	1.25754	0.330607	0.444706	0.326008	2.24402e+06	2328100	0.963884	-0.053068	-0.312278	0.585747	2821950	2821475	1.00017	0.00024286	0.222823	0.97923	2821950	2328100	1.21213	0.277539	0.0148923	0.286018
P27931	Interleukin-1 receptor type 2;Interleukin-1 receptor type 2, membrane form;Interleukin-1 receptor type 2, soluble form	Il1r2	2	7847500	8830600	4740600	6346300	9831700	8087200	7905100	6414900	7005500	6459200	8007700	5014600	7439300	8726900	8807400	6680400	6941250	6621750	1.04825	0.0679829	-0.470286	0.84576	8059725	7913500	1.01848	0.0264147	-0.197975	0.908922	7913500	6621750	1.19508	0.257103	0.195702	0.196236	8059725	6941250	1.16113	0.215535	0.577774	0.32898	8059725	6621750	1.21716	0.283518	0.0241519	0.202838
O88668	Protein CREG1	Creg1	2	977408	2367500	3633400	4175100	661377	4374600	2833900	2895800	697888	1578000	3220300	2301500	3637200	3940300	3276800	2549400	NA	NA	NA	NA	NA	NA	2.69142e+06	3350925	0.803187	-0.316192	-0.921814	0.315638	3350925	1.94942e+06	1.71893	0.781513	1.05455	0.0551861	NA	NA	NA	NA	NA	NA	NA	NA	NA	NA	NA	NA
Q08879-2	Fibulin-1	Fbln1	2	11617000	10699000	7934800	9137700	17460000	8464000	11377000	7548500	11943000	8628100	10769000	6420000	11941000	10624000	9923200	10817000	9847125	9440025	1.04312	0.0609119	-0.479661	0.732983	11212375	10826300	1.03566	0.0505516	-0.146979	0.923872	10826300	9440025	1.14685	0.197678	0.0983785	0.304413	11212375	9847125	1.13864	0.187317	0.531251	0.668119	11212375	9440025	1.18775	0.248229	-0.0305027	0.524255
B8JK33	Heterogeneous nuclear ribonucleoprotein M	Hnrnpm	2	43787000	36588000	38496000	27154000	35354000	35520000	34277000	43002000	45612000	33526000	36200000	31283000	27251000	32648000	34279000	34307000	36506250	36655250	0.995935	-0.00587637	-0.568205	0.955703	37038250	32121250	1.15308	0.205488	0.180361	0.154048	32121250	36655250	0.876307	-0.190492	-0.537342	0.32199	37038250	36506250	1.01457	0.0208725	0.256835	0.844474	37038250	36655250	1.01045	0.0149961	-0.391731	0.895272
A6XA75	Trem-like transcript 1 protein	Treml1	2	4107100	3557300	21564000	7297700	661377	30719000	591593	4140800	697888	475176	7613200	5965500	8818600	12541000	2378800	601777	9131525	3.68794e+06	2.47605	1.30804	1.17372	0.106094	NA	NA	NA	NA	NA	NA	NA	NA	NA	NA	NA	NA	9.02819e+06	9131525	0.988684	-0.0164186	0.195354	0.30741	NA	NA	NA	NA	NA	NA
E9Q9Z9	Dentin sialophosphoprotein;Dentin phosphoprotein;Dentin sialoprotein	Dspp	2	11427000	10656000	5977300	8007300	4727600	6737800	11046000	7747000	8288700	7888000	13617000	8818900	9080400	6841900	6853500	7694500	9016900	9653150	0.934089	-0.0983683	-0.690827	0.7036	7564600	7617575	0.993046	-0.010068	-0.275053	0.80044	7617575	9653150	0.789128	-0.341668	-0.78493	0.175187	7564600	9016900	0.838936	-0.253368	-0.195302	0.395937	7564600	9653150	0.783641	-0.351736	-0.959719	0.23077
Q7TS08	Olfactory receptor 295	Olfr295	2	1022500000	1199100000	687750000	822080000	832990000	795740000	566640000	1219200000	907420000	371530000	799610000	1019700000	1052900000	943460000	1005000000	1114400000	932857500	774565000	1.20436	0.26827	-0.204755	0.356287	853642500	1028940000	0.829633	-0.269455	-0.823071	0.187913	1028940000	774565000	1.32841	0.409701	0.445617	0.137723	853642500	932857500	0.915083	-0.128025	0.0113498	0.594604	853642500	774565000	1.10209	0.140246	-0.197746	0.625858
Q61268	Apolipoprotein C-IV	Apoc4	2	254860000	233050000	147430000	273160000	234580000	221840000	268110000	247780000	170650000	64226000	140790000	96711000	210910000	141210000	259170000	162330000	227125000	118094250	1.92325	0.943548	0.690494	0.0173463	243077500	193405000	1.25683	0.329791	0.442982	0.104848	193405000	118094250	1.63772	0.711686	0.940191	0.049496	243077500	227125000	1.07024	0.0979298	0.383879	0.545115	243077500	118094250	2.05833	1.04148	1.19807	0.00500327
Q64739-7	Collagen alpha-2(XI) chain	Col11a2	2	2268500	3168700	2237100	2092900	2542900	2035900	2828600	2630100	697888	1442600	3198900	2217500	3353600	2878500	2320300	2345800	2441800	1.88922e+06	1.29249	0.370153	-0.0696849	0.230997	2509375	2724550	0.921024	-0.11869	-0.504543	0.525827	2724550	1.88922e+06	1.44215	0.528226	0.63973	0.131936	2509375	2441800	1.02767	0.039383	0.287353	0.795518	2509375	1.88922e+06	1.32826	0.409536	0.219326	0.194567
Q9Z126	Platelet factor 4	Pf4	2	34870000	32516000	247640000	60965000	5419100	214840000	16682000	9701700	6276400	2956200	98509000	64967000	97860000	132330000	21952000	4167900	93997750	43177150	2.17703	1.12236	0.927551	0.168469	61660700	64077475	0.962284	-0.055466	-0.370967	0.657088	64077475	43177150	1.48406	0.569549	0.707408	0.577933	61660700	93997750	0.655981	-0.608275	-0.780434	0.202301	61660700	43177150	1.42809	0.514083	0.381248	0.911676
Q9WTR5	Cadherin-13	Cdh13	2	1081200	1971700	1635300	2304400	1836100	676328	1756400	1942600	1504700	1962000	1920500	1400000	1841200	2165400	1672000	2081000	1748150	1696800	1.03026	0.0430125	-0.503391	0.987269	1.55286e+06	1939900	0.800483	-0.321057	-0.932093	0.242819	1939900	1696800	1.14327	0.193166	0.0909891	0.287201	1.55286e+06	1748150	0.888286	-0.170904	-0.0593448	0.56902	1.55286e+06	1696800	0.915168	-0.127891	-0.613033	0.53634
Q9JKR6	Hypoxia up-regulated protein 1	Hyou1	2	969670	837990	819460	949510	822680	786970	1042000	734900	936020	657100	1294000	660580	1001800	1008600	794410	1082200	894158	886925	1.00815	0.0117169	-0.544881	0.793833	846638	971752	0.871248	-0.198845	-0.673889	0.232055	971752	886925	1.09564	0.131777	-0.00955003	0.484216	846638	894158	0.946855	-0.0787846	0.0925315	0.583017	846638	886925	0.954576	-0.0670677	-0.51883	0.935979
E9PZC2	Spectrin beta, non-erythrocytic 4	Sptbn4	2	977408	36681000	24729000	30297000	45091000	43063000	27549000	35965000	18632000	17408000	15548000	21982000	53020000	11582000	18047000	26379000	2.31711e+07	18392500	1.25981	0.333209	-0.118663	0.639028	37917000	27257000	1.39109	0.476218	0.752343	0.162107	27257000	18392500	1.48196	0.567509	0.704066	0.429394	37917000	2.31711e+07	1.63639	0.710518	1.39385	0.193495	37917000	18392500	2.06155	1.04373	1.20155	0.00104798
A2AI62	Hephaestin	Heph	2	2857000	2327800	2613900	2173400	3298300	2816300	1333500	567918	697888	1378200	2178700	497180	2493600	2699200	3334500	601777	2493025	1.18799e+06	2.09852	1.06937	0.857305	0.0156926	NA	NA	NA	NA	NA	NA	NA	NA	NA	NA	NA	NA	2.004e+06	2493025	0.803845	-0.315012	-0.296934	0.275629	NA	NA	NA	NA	NA	NA
H7BXC3	Triosephosphate isomerase	Tpi1	2	6775600	4647900	7459400	2192500	661377	10150000	2850400	8369500	697888	1204700	6416300	9891100	3378100	9852700	2896600	1753000	5268850	4.5525e+06	1.15735	0.21083	-0.280907	0.364092	5.50782e+06	4470100	1.23215	0.301174	0.382521	0.983691	4470100	4.5525e+06	0.981901	-0.026351	-0.268522	0.657858	5.50782e+06	5268850	1.04536	0.0639931	0.327928	0.637174	NA	NA	NA	NA	NA	NA
Q9CPN9	RIKEN cDNA 2210010C04 gene	2210010C04Rik	2	30421000	21059000	19043000	23080000	23433000	23391000	22314000	24213000	32696000	12700000	34063000	13808000	23551000	18014000	29051000	14718000	23400750	23316750	1.0036	0.00518806	-0.553537	0.731731	23337750	21333500	1.09395	0.129545	0.0199126	0.42428	21333500	23316750	0.914943	-0.128246	-0.4354	0.947606	23337750	23400750	0.997308	-0.00388929	0.216011	0.915899	23337750	23316750	1.0009	0.00129876	-0.412945	0.682068
P20065-2	Isoform Short of Thymosin beta-4	Tmsb4x	2	11518000	9640400	9211000	6828100	8104700	9732200	11342000	4711600	4416100	2441600	5005100	5815000	17235000	13144000	2778200	4145400	9299375	4419450	2.10419	1.07327	0.862469	0.00504126	8472625	9325650	0.908529	-0.138395	-0.546175	0.785623	9325650	4419450	2.11014	1.07734	1.53903	0.236141	8472625	9299375	0.911096	-0.134325	0.000962962	0.553707	8472625	4419450	1.91712	0.938942	1.03926	0.0291045
E0CY49	Argininosuccinate lyase	Asl	2	501000	1079700	760870	791790	741200	719080	499890	469800	697888	650690	722840	1349600	783030	1046500	731956	814910	783340	855255	0.915914	-0.126715	-0.728408	0.731759	607492	844099	0.719693	-0.474545	-1.25637	0.0409034	NA	NA	NA	NA	NA	NA	607492	783340	0.775516	-0.366772	-0.382271	0.234864	607492	855255	0.710306	-0.493487	-1.17926	0.14771
V9GXT4	Interleukin-6 receptor subunit beta	Il6st	2	3270600	3515100	3401900	2957400	4096000	3667200	2924600	2728000	1879300	2181900	3498800	1840100	2493300	3598300	3367400	2989600	3286250	2350025	1.39839	0.483766	0.0809381	0.0498065	3353950	3112150	1.0777	0.10795	-0.0257125	0.588868	3112150	2350025	1.32431	0.405235	0.438304	0.101681	3353950	3286250	1.0206	0.0294189	0.270926	0.940879	3353950	2350025	1.4272	0.513185	0.379856	0.0625703
Q64695	Endothelial protein C receptor	Procr	2	5692300	4878700	4483700	5946600	4891600	5441900	5385700	5167600	4159800	4069900	7893600	3975200	4511500	5345400	4453100	5467300	5250325	5024625	1.04492	0.0633908	-0.476374	0.653605	5221700	4944325	1.0561	0.078746	-0.0874121	0.493046	4944325	5024625	0.984019	-0.0232424	-0.263431	0.887085	5221700	5250325	0.994548	-0.00788716	0.209419	0.998915	5221700	5024625	1.03922	0.0555036	-0.328993	0.635624
B1AXW5	Peroxiredoxin-1	Prdx1	2	7549300	6708500	5903700	6386400	5675800	676328	5836500	6877600	6151500	5409100	5576400	3631500	6578300	6593100	6483500	5752600	6636975	5192125	1.27828	0.354201	-0.0908332	0.106639	4.76656e+06	6351875	0.750417	-0.414235	-1.12895	0.263902	6351875	5192125	1.22337	0.290857	0.250983	0.13766	4.76656e+06	6636975	0.718182	-0.477578	-0.564956	0.229339	4.76656e+06	5192125	0.918036	-0.123378	-0.606041	0.470358
Q91X17	Uromodulin;Uromodulin, secreted form	Umod	2	12383000	8177100	5334000	8480700	8130400	7554300	7387100	5779300	5566600	6244200	6488900	3371800	8243600	11072000	8956400	7576800	8593700	5417875	1.58618	0.665552	0.321941	0.0680548	7212775	8962200	0.8048	-0.313299	-0.915701	0.0983763	8962200	5417875	1.65419	0.726126	0.963839	0.0136553	7212775	8593700	0.83931	-0.252725	-0.194242	0.45662	7212775	5417875	1.33129	0.412827	0.224424	0.104038
A2APM2	CD44 antigen	Cd44	2	42255000	38553000	26320000	30448000	36122000	36572000	32460000	33640000	27537000	27887000	35794000	22084000	36557000	37104000	29540000	26214000	34394000	28325500	1.21424	0.280055	-0.189131	0.254637	34698500	32353750	1.07247	0.10094	-0.0405212	0.449665	32353750	28325500	1.14221	0.191832	0.088804	0.353324	34698500	34394000	1.00885	0.0127164	0.243388	0.84355	34698500	28325500	1.22499	0.292772	0.0384841	0.122966
A0A3B2W3S4	RIKEN cDNA 1700010I14 gene	1700010I14Rik	2	148090000	101000000	83675000	116370000	201310000	105730000	198360000	121750000	199740000	167190000	78374000	210800000	162790000	110750000	83644000	121290000	112283750	164026000	0.684548	-0.546775	-1.2853	0.195748	156787500	119618500	1.31073	0.39037	0.570969	0.230295	119618500	164026000	0.729265	-0.455484	-0.971331	0.284487	156787500	112283750	1.39635	0.481661	1.01653	0.139115	156787500	164026000	0.95587	-0.065114	-0.515804	0.946733
P30412	Peptidyl-prolyl cis-trans isomerase C	Ppic	2	4152300	4622600	4061900	4422400	5968000	5532900	3794700	3701400	2583000	2671000	4629400	2480500	4651100	5815800	3320800	4358200	4314800	3090975	1.39593	0.481232	0.0775781	0.0476303	4749250	4536475	1.0469	0.066128	-0.114071	0.799256	4536475	3090975	1.46765	0.55351	0.681139	0.0556926	4749250	4314800	1.10069	0.138406	0.450612	0.593909	4749250	3090975	1.53649	0.619638	0.544729	0.0449707
P07758	Alpha-1-antitrypsin 1-1	Serpina1a	2	225090000	213760000	223600000	206260000	227150000	225510000	270080000	278670000	124690000	180060000	247610000	189380000	247140000	307940000	233410000	143130000	217177500	185435000	1.17118	0.227961	-0.258195	0.259272	250352500	232905000	1.07491	0.104219	-0.0335937	0.539129	232905000	185435000	1.25599	0.328828	0.313169	0.302545	250352500	217177500	1.15276	0.205086	0.560547	0.167794	250352500	185435000	1.35008	0.433047	0.25574	0.0725137
Q06318	Uteroglobin	Scgb1a1	2	8695700	6213300	6971900	5837700	6823600	8616600	5800500	4275600	5069300	4035900	9425800	4265600	8247700	15429000	5807700	3744600	6929650	5699150	1.21591	0.282036	-0.186506	0.25936	6379075	8307250	0.767893	-0.381024	-1.05879	0.606475	8307250	5699150	1.45763	0.543624	0.664949	0.360375	6379075	6929650	0.920548	-0.119435	0.0255111	0.552828	6379075	5699150	1.1193	0.1626	-0.163123	0.544282
Q9R0Y5	Adenylate kinase isoenzyme 1	Ak1	2	2646000	648640	2302400	1266500	661377	4014300	1045700	3324200	697888	399790	1905800	2146300	2545700	2950300	807880	601777	1715885	1.28744e+06	1.33278	0.414443	-0.0109677	0.426448	NA	NA	NA	NA	NA	NA	NA	NA	NA	NA	NA	NA	2.26139e+06	1715885	1.31792	0.39826	0.87903	0.755623	NA	NA	NA	NA	NA	NA
Q9QUN9	Dickkopf-related protein 3	Dkk3	2	977408	3669900	3129000	3133700	4599900	2912700	3529700	3571300	3697800	4606300	2872900	3235400	3202700	3501600	1488400	2586500	2.7275e+06	3603100	0.756988	-0.401658	-1.09291	0.224127	3653400	2694800	1.35572	0.439062	0.673841	0.122889	2694800	3603100	0.747912	-0.41906	-0.911678	0.145742	3653400	2.7275e+06	1.33947	0.421659	0.917609	0.207954	3653400	3603100	1.01396	0.020001	-0.383979	0.915863
Q8BTI8-2	Serine/arginine repetitive matrix protein 2	Srrm2	2	977408	1180100	1560500	1529300	2517200	1205800	591593	567918	1353200	475176	1638000	1862100	1019100	1327300	1298900	1698500	NA	NA	NA	NA	NA	NA	1.22063e+06	1335950	0.913678	-0.130243	-0.528951	0.43633	1335950	1.33212e+06	1.00288	0.00414294	-0.218581	0.726755	NA	NA	NA	NA	NA	NA	NA	NA	NA	NA	NA	NA
Q9D7B1	tRNA-dihydrouridine(20) synthase [NAD(P)+]-like	Dus2	2	9520300	4161800	6605900	6904700	6428600	7510800	4677400	4781600	6699400	8395200	8894600	6950900	7267300	6770200	6428400	5906500	6798175	7735025	0.878882	-0.186258	-0.807347	0.394097	5849600	6593100	0.887231	-0.172619	-0.618481	0.304533	6593100	7735025	0.85237	-0.230449	-0.602782	0.19592	5849600	6798175	0.860466	-0.21681	-0.135029	0.523104	5849600	7735025	0.756248	-0.403068	-1.03922	0.0794728
A0A087WRM8	LisH domain and HEAT repeat-containing protein KIAA1468	Relch	2	40917000	48311000	59664000	44031000	44985000	43664000	44513000	45989000	46346000	51925000	51861000	45221000	46396000	47609000	52290000	44287000	48230750	48838250	0.987561	-0.0180583	-0.584356	0.869889	44787750	47645500	0.940021	-0.0892358	-0.442314	0.413203	47645500	48838250	0.975578	-0.0356715	-0.283787	0.804197	44787750	48230750	0.928614	-0.106849	0.0462619	0.553863	44787750	48838250	0.917063	-0.124907	-0.608411	0.404526
Q05020	Apolipoprotein C-II	Apoc2	2	188870000	229370000	142580000	184840000	139660000	194350000	203440000	183440000	66624000	35758000	118130000	84456000	159860000	140660000	245700000	206940000	186415000	76242000	2.44504	1.28986	1.14962	0.00378616	180222500	188290000	0.957154	-0.0631772	-0.387259	0.841374	188290000	76242000	2.46964	1.3043	1.91074	0.004609	180222500	186415000	0.966781	-0.0487388	0.142068	0.829272	180222500	76242000	2.36382	1.24112	1.50727	0.00452369
A0A286YDF6	Receptor-type tyrosine-protein phosphatase S	Ptprs	2	7911200	816550	569554	9026300	9629700	10845000	5233100	8213500	10732000	8445800	425807	497180	9332100	8843600	9518600	601777	NA	NA	NA	NA	NA	NA	8480325	7.07402e+06	1.1988	0.261589	0.298889	0.389399	NA	NA	NA	NA	NA	NA	8480325	4580901	1.85124	0.888488	1.68727	0.0953413	8480325	5.0252e+06	1.68756	0.754939	0.754282	0.110108
A0A1B0GQV5	Serum amyloid A-2 protein;Amyloid protein A	Saa2	2	977408	1009300	738860	285210000	633600	850720	729880	698450	1052800	622350	593640	837680	680810	404724	743520	538100	7.19839e+07	776618	92.689	6.53433	8.10247	0.217697	728162	591788	1.23044	0.299179	0.378306	0.154096	591788	776618	0.762008	-0.392123	-0.867562	0.17543	728162	7.19839e+07	0.0101156	-6.62727	-10.7039	0.220063	728162	776618	0.937608	-0.0929438	-0.558906	0.790123
Q91XA2	Golgi membrane protein 1	Golm1	2	977408	816550	290610	351310	309420	676328	245520	264060	697888	475176	425807	268550	663032	404724	731956	502590	NA	NA	NA	NA	NA	NA	NA	NA	NA	NA	NA	NA	NA	NA	NA	NA	NA	NA	NA	NA	NA	NA	NA	NA	NA	NA	NA	NA	NA	NA
A0A0A6YWI9	Immunoglobulin heavy variable V1-11 (Fragment)	Ighv1-11	2	977408	816550	569554	478172	661377	676328	591593	567918	697888	475176	425807	497180	663032	404724	731956	601777	NA	NA	NA	NA	NA	NA	NA	NA	NA	NA	NA	NA	NA	NA	NA	NA	NA	NA	NA	NA	NA	NA	NA	NA	NA	NA	NA	NA	NA	NA
Q9JHI0	Matrix metalloproteinase-19	Mmp19	2	2936700	4555300	569554	478172	661377	676328	591593	567918	697888	475176	425807	497180	3184700	404724	731956	601777	NA	NA	NA	NA	NA	NA	NA	NA	NA	NA	NA	NA	NA	NA	NA	NA	NA	NA	NA	NA	NA	NA	NA	NA	NA	NA	NA	NA	NA	NA
A0A494BBJ8	Fermitin family homolog 3	Fermt3	2	977408	2587500	2535700	478172	661377	676328	591593	567918	697888	475176	425807	497180	663032	2162800	731956	1514000	NA	NA	NA	NA	NA	NA	NA	NA	NA	NA	NA	NA	NA	NA	NA	NA	NA	NA	NA	NA	NA	NA	NA	NA	NA	NA	NA	NA	NA	NA
A0A075B680	Immunoglobulin heavy variable 1-62-2	Ighv1-62-2	2	977408	25599000	569554	1732200	661377	676328	591593	567918	697888	475176	425807	497180	663032	404724	731956	601777	NA	NA	NA	NA	NA	NA	NA	NA	NA	NA	NA	NA	NA	NA	NA	NA	NA	NA	NA	NA	NA	NA	NA	NA	NA	NA	NA	NA	NA	NA
A0A075B5T2	Immunoglobulinheavy chain V-III region T957;Immunoglobulinheavy chain V-III region ABE-47N;Immunoglobulinheavy chain V-III region E109;Immunoglobulinheavy chain V-III region U61;Immunoglobulinheavy chain V-III region A4;Immunoglobulinheavy chain V-III region W3082;Immunoglobulinheavy chain V-III region J606	Ighv6-3	2	12064000	816550	3203300	6233500	661377	676328	591593	567918	3367300	475176	425807	497180	663032	404724	731956	601777	NA	NA	NA	NA	NA	NA	NA	NA	NA	NA	NA	NA	NA	NA	NA	NA	NA	NA	NA	NA	NA	NA	NA	NA	NA	NA	NA	NA	NA	NA
G3UZP7	H-2 class I histocompatibility antigen, D-B alpha chain	H2-D1	2	56271000	84826000	569554	42821000	661377	676328	591593	567918	697888	475176	425807	497180	663032	404724	731956	601777	NA	NA	NA	NA	NA	NA	NA	NA	NA	NA	NA	NA	NA	NA	NA	NA	NA	NA	NA	NA	NA	NA	NA	NA	NA	NA	NA	NA	NA	NA
A0A0N4SVL8	Multimerin-1	Mmrn1	2	977408	816550	1672500	478172	661377	2085800	591593	567918	697888	475176	425807	497180	663032	404724	731956	601777	NA	NA	NA	NA	NA	NA	NA	NA	NA	NA	NA	NA	NA	NA	NA	NA	NA	NA	NA	NA	NA	NA	NA	NA	NA	NA	NA	NA	NA	NA
A0A338P799	Ras/Rap GTPase-activating protein SynGAP	Syngap1	2	2600900	1400700	569554	478172	4527600	2478400	591593	567918	697888	475176	425807	497180	2159000	1125800	731956	601777	NA	NA	NA	NA	NA	NA	NA	NA	NA	NA	NA	NA	NA	NA	NA	NA	NA	NA	NA	NA	NA	NA	NA	NA	NA	NA	NA	NA	NA	NA
Q8BL80-3	Rho GTPase-activating protein 22	Arhgap22	2	31506000	36856000	12658000	478172	661377	676328	29415000	567918	697888	475176	425807	21228000	663032	404724	731956	601777	NA	NA	NA	NA	NA	NA	NA	NA	NA	NA	NA	NA	NA	NA	NA	NA	NA	NA	NA	NA	NA	NA	NA	NA	NA	NA	NA	NA	NA	NA
P70296	Phosphatidylethanolamine-binding protein 1;Hippocampal cholinergic neurostimulating peptide	Pebp1	2	3107500	816550	2217400	478172	661377	6158400	591593	3710700	697888	475176	425807	3178700	663032	6592600	731956	601777	NA	NA	NA	NA	NA	NA	NA	NA	NA	NA	NA	NA	NA	NA	NA	NA	NA	NA	NA	NA	NA	NA	NA	NA	NA	NA	NA	NA	NA	NA
Q02596	Glycosylation-dependent cell adhesion molecule 1	Glycam1	2	2238900	2445300	2402300	478172	661377	676328	2045600	2682900	697888	1511100	425807	1663300	2449900	404724	731956	601777	NA	NA	NA	NA	NA	NA	NA	NA	NA	NA	NA	NA	NA	NA	NA	NA	NA	NA	NA	NA	NA	NA	NA	NA	NA	NA	NA	NA	NA	NA
P05555	Integrin alpha-M	Itgam	2	2242200	2717600	569554	2035000	661377	676328	591593	567918	2394000	1806200	425807	2188000	3140200	1096200	731956	601777	NA	NA	NA	NA	NA	NA	NA	NA	NA	NA	NA	NA	NA	NA	NA	NA	NA	NA	NA	NA	NA	NA	NA	NA	NA	NA	NA	NA	NA	NA
Q9EQ08	Heparan N-sulfatase	Sgsh	2	2922800	2763300	569554	2959300	661377	2569800	2377900	1973000	697888	1874500	425807	1784600	663032	404724	731956	601777	NA	NA	NA	NA	NA	NA	NA	NA	NA	NA	NA	NA	NA	NA	NA	NA	NA	NA	NA	NA	NA	NA	NA	NA	NA	NA	NA	NA	NA	NA
A0A0B4J1I9	Immunoglobulinkappa chain V-VI region NQ2-6.1	Igkv4-55	2	13950000	5170000	2065200	478172	661377	676328	591593	567918	5463500	2259600	425807	497180	663032	404724	731956	601777	NA	NA	NA	NA	NA	NA	NA	NA	NA	NA	NA	NA	NA	NA	NA	NA	NA	NA	NA	NA	NA	NA	NA	NA	NA	NA	NA	NA	NA	NA
P06797	Cathepsin L1;Cathepsin L1 heavy chain;Cathepsin L1 light chain	Ctsl	2	977408	5690800	569554	3437700	661377	4881600	591593	3467700	3915100	3168100	425807	497180	4319800	3886700	731956	601777	NA	NA	NA	NA	NA	NA	NA	NA	NA	NA	NA	NA	NA	NA	NA	NA	NA	NA	NA	NA	NA	NA	NA	NA	NA	NA	NA	NA	NA	NA
E9PUM3	Alpha-1,4 glucan phosphorylase;Glycogen phosphorylase, muscle form	Pygm	2	977408	816550	569554	478172	661377	676328	2205700	3043700	3169800	3972900	425807	3352100	663032	404724	731956	601777	NA	NA	NA	NA	NA	NA	NA	NA	NA	NA	NA	NA	NA	NA	NA	NA	NA	NA	NA	NA	NA	NA	NA	NA	NA	NA	NA	NA	NA	NA
Q5SX59	Enolase;Beta-enolase	Eno3	2	1738600	816550	1351200	478172	661377	2138900	591593	1654900	697888	475176	1517900	1123200	663032	1893000	1138400	601777	NA	NA	NA	NA	NA	NA	NA	NA	NA	NA	NA	NA	NA	NA	NA	NA	NA	NA	NA	NA	NA	NA	NA	NA	NA	NA	NA	NA	NA	NA
P00329	Alcohol dehydrogenase 1	Adh1	2	2520800	2546000	569554	478172	661377	2285100	591593	567918	697888	2508600	2016100	7963800	2062200	2276500	731956	601777	NA	NA	NA	NA	NA	NA	NA	NA	NA	NA	NA	NA	NA	NA	NA	NA	NA	NA	NA	NA	NA	NA	NA	NA	NA	NA	NA	NA	NA	NA
P13609	Serglycin	Srgn	2	4163000	816550	9629000	7246200	661377	16691000	591593	3947400	697888	475176	8807900	4012100	9225300	9656800	731956	601777	NA	NA	NA	NA	NA	NA	NA	NA	NA	NA	NA	NA	NA	NA	NA	NA	NA	NA	NA	NA	NA	NA	NA	NA	NA	NA	NA	NA	NA	NA
[truncated: 6 more columns]

## Sheet: Significant different proteins
																				MWrn 10m / MWT10m						MWrn 4m / MWT 4m						MWT 4m / MWT 10m						MWrn 4m / MWrn 10m						MWrn 4m / MWT 10m
Accession	ProteinNames	GeneNames	RazorUniquePeptides	MWrn10m_2970	MWrn10m_2971	MWrn10m_2972	MWrn10m_2973	MWrn4m_3026	MWrn4m_3029	MWrn4m_3123	MWrn4m_3124	MWT10m_3048	MWT10m_3049	MWT10m_3051	MWT10m_3052	MWT4m_3000	MWT4m_3001	MWT4m_3014	MWT4m_3017	mean_g1 MWrn10m_MWT10m	mean_g2 MWrn10m_MWT10m	Ratio_g1_g2 MWrn10m_MWT10m	log2Ratio MWrn10m_MWT10m	zscore MWrn10m_MWT10m	pval_Limma MWrn10m_MWT10m	mean_g1 MWrn4m_MWT4m	mean_g2 MWrn4m_MWT4m	Ratio_g1_g2 MWrn4m_MWT4m	log2Ratio MWrn4m_MWT4m	zscore MWrn4m_MWT4m	pval_Limma MWrn4m_MWT4m	mean_g1 MWT4m_MWT10m	mean_g2 MWT4m_MWT10m	Ratio_g1_g2 MWT4m_MWT10m	log2Ratio MWT4m_MWT10m	zscore MWT4m_MWT10m	pval_Limma MWT4m_MWT10m	mean_g1 MWrn4m_MWrn10m	mean_g2 MWrn4m_MWrn10m	Ratio_g1_g2 MWrn4m_MWrn10m	log2Ratio MWrn4m_MWrn10m	zscore MWrn4m_MWrn10m	pval_Limma MWrn4m_MWrn10m	mean_g1 MWrn4m_MWT10m	mean_g2 MWrn4m_MWT10m	Ratio_g1_g2 MWrn4m_MWT10m	log2Ratio MWrn4m_MWT10m	zscore MWrn4m_MWT10m	pval_Limma MWrn4m_MWT10m
Q00898	Alpha-1-antitrypsin 1-5	Serpina1e	14	3946200000	2535800000	3685000000	3479900000	11806000000	4602800000	15393000000	10722000000	20052000000	19160000000	12616000000	19539000000	10892000000	11027000000	9310200000	8277500000	3411725000	17841750000	0.191221	-2.38668	-3.72456	3.46184e-06	10630950000	9876675000	1.07637	0.106173	-0.0294656	0.97507	9876675000	17841750000	0.553571	-0.85316	-1.62262	0.00280368	10630950000	3411725000	3.116	1.6397	2.92578	0.00288273	10630950000	17841750000	0.595847	-0.746987	-1.57188	0.0501333
P12246	Serum amyloid P-component	Apcs	5	64025000	73667000	47615000	177910000	25916000	20606000	47024000	37394000	559300000	171770000	34390000	141630000	36387000	34267000	30510000	21945000	90804250	226772500	0.40042	-1.32041	-2.31095	0.287255	32735000	30777250	1.06361	0.0889696	-0.0658122	0.886378	30777250	226772500	0.135719	-2.88131	-4.9442	0.0124924	32735000	90804250	0.360501	-1.47193	-2.20433	0.0142249	32735000	226772500	0.144352	-2.79234	-4.73969	0.0164719
P07361	Alpha-1-acid glycoprotein 2	Orm2	4	29629000	42351000	26558000	157150000	24361000	24009000	142140000	72696000	274230000	88266000	34530000	179710000	50824000	19392000	16343000	19908000	63922000	144184000	0.443336	-1.17353	-2.11622	0.142356	65801500	26616750	2.47218	1.30579	2.50501	0.140878	26616750	144184000	0.184603	-2.4375	-4.21737	0.0083601	65801500	63922000	1.0294	0.0418079	0.291351	0.946903	65801500	144184000	0.456372	-1.13172	-2.16774	0.175558
A0A075B5M7	Immunoglobulin kappa variable 5-39	Igkv5-39	3	10936000	77611000	18340000	10215000	52297000	13991000	1373000	5502700	6857000	10052000	5077300	6085700	663032	404724	731956	601777	29275500	7018000	4.17149	2.06056	2.17137	0.032454	18290925	600372	30.466	4.92913	10.1602	0.00458537	600372	7018000	0.0855475	-3.54713	-6.03465	6.51628e-07	18290925	29275500	0.624786	-0.678566	-0.896322	0.312771	18290925	7018000	2.60629	1.382	1.72546	0.730588
Q923D2	Flavin reductase (NADPH)	Blvrb	8	20232000	13923000	6799300	3309100	6270700	28689000	5788000	33424000	697888	141330	3045000	5098200	7385700	12012000	3344000	461280	11065850	2.2456e+06	4.92778	2.30094	2.49005	0.0237103	18542925	5800745	3.19665	1.67656	3.28835	0.105425	5800745	2.2456e+06	2.58316	1.36913	2.01692	0.253666	18542925	11065850	1.67569	0.744755	1.45029	0.453317	18542925	2.2456e+06	8.25743	3.04569	4.30216	0.013275
P13634	Carbonic anhydrase 1	Ca1	9	41842000	21091000	14935000	7904700	12292000	38787000	13159000	40105000	930290	1500200	5471700	9208000	12384000	23731000	6205100	2502600	21443175	4.27755e+06	5.01296	2.32566	2.52283	0.00900725	26085750	11205675	2.32791	1.21903	2.32172	0.0878408	11205675	4.27755e+06	2.61965	1.38937	2.05007	0.126996	26085750	21443175	1.21651	0.282743	0.688579	0.612456	26085750	4.27755e+06	6.0983	2.60841	3.6249	0.00508145
P24270	Catalase	Cat	10	15835000	10212000	4952000	3590100	3538000	19396000	4103700	20891000	697888	475176	1199200	3616300	4002300	9266800	1964500	727810	8647275	1.49714e+06	5.77586	2.53004	2.79378	0.00339352	11982175	3.99035e+06	3.00279	1.5863	3.09766	0.102632	3.99035e+06	1.49714e+06	2.66531	1.41431	2.0909	0.166502	11982175	8647275	1.38566	0.470572	0.998251	0.735945	11982175	1.49714e+06	8.00337	3.00061	4.23234	0.00568141
P07724	Serum albumin	Alb	19	79271000	9480900	14622000	19671000	11043000	10054000	1665300	5637200	4014700	5759300	4263700	4952400	11203000	4136700	12026000	7930600	30761225	4747525	6.47942	2.69587	3.01363	0.00465155	7099875	8824075	0.804603	-0.313651	-0.916446	0.437591	8824075	4747525	1.85867	0.894269	1.23921	0.0445924	7099875	30761225	0.230806	-2.11525	-3.26497	0.0415222	7099875	4747525	1.49549	0.580618	0.484296	0.636897
P04117	Fatty acid-binding protein, adipocyte	Fabp4	7	25987000	1525800	2536700	1368000	8851800	3872600	1645600	5524200	697888	691890	1159900	1511500	51590000	38223000	731956	601777	7854375	1.01529e+06	7.73606	2.9516	3.35267	0.0665493	4973550	2.27867e+07	0.218266	-2.19584	-4.89303	0.82359	NA	NA	NA	NA	NA	NA	4973550	7854375	0.63322	-0.65922	-0.864428	0.768959	4973550	1.01529e+06	4.89863	2.29238	3.13544	0.00294743
P15327	Bisphosphoglycerate mutase;Phosphoglycerate mutase	Bpgm	3	19561000	10200000	4278700	2602600	4176500	20102000	4803200	22347000	598390	409850	956070	1737600	7427200	5459100	1572800	1330300	9160575	925478	9.89821	3.30717	3.82406	0.00144703	12857175	3947350	3.25717	1.70362	3.34552	0.0680912	3947350	925478	4.2652	2.09261	3.20179	0.0187605	12857175	9160575	1.40353	0.489064	1.02874	0.544532	12857175	925478	13.8925	3.79623	5.46459	0.000662215
Q9Z0K8	Pantetheinase	Vnn1	9	29882000	31453000	17496000	15473000	4929300	11294000	1051700	2781600	1520000	475176	4241400	867050	7286400	3233500	6538500	6824900	23576000	1.77591e+06	13.2755	3.73069	4.38555	0.000111759	5014150	5970825	0.839775	-0.251925	-0.786035	0.352714	5970825	1.77591e+06	3.36213	1.74937	2.63966	0.00807078	5014150	23576000	0.21268	-2.23324	-3.4595	0.00409794	5014150	1.77591e+06	2.82343	1.49745	1.90427	0.116185
P32848	Parvalbumin alpha	Pvalb	2	3613800	816550	2507600	478172	2469500	2810900	591593	3383900	2437900	1812300	425807	2927500	6989900	11809000	3289900	4157200	NA	NA	NA	NA	NA	NA	2.31397e+06	6561500	0.352659	-1.50365	-3.43061	0.0358593	6561500	1.90088e+06	3.45183	1.78736	2.70187	0.0172445	NA	NA	NA	NA	NA	NA	NA	NA	NA	NA	NA	NA
A0A1B0GR60	Ferritin;Ferritin light chain 1	Ftl1	5	10315000	9880800	3779500	5688900	2149900	5665800	1321200	3796500	697888	10021000	8958500	6020500	8039400	8109600	5968400	4840900	7416050	6.42447e+06	1.15434	0.207073	-0.285888	0.458828	3233350	6739575	0.479756	-1.05963	-2.4925	0.0239651	6739575	6.42447e+06	1.04905	0.0690797	-0.112232	0.480502	3233350	7416050	0.435994	-1.19762	-1.75208	0.034549	3233350	6.42447e+06	0.503286	-0.990548	-1.9491	0.470926
A8DUK4	Hemoglobin subunit beta-1	Hbbt1	16	13709000000	8398800000	5493900000	3129200000	4979800000	16037000000	5244200000	15872000000	939310000	799000000	2901400000	4338500000	5514700000	9874800000	3492500000	1465300000	7682725000	2244552500	3.42283	1.77519	1.79304	0.0159855	10533250000	5086825000	2.07069	1.05011	1.96484	0.123714	5086825000	2244552500	2.2663	1.18034	1.70772	0.125333	10533250000	7682725000	1.37103	0.455261	0.973007	0.469692	10533250000	2244552500	4.69281	2.23045	3.03953	0.00692577
F8WH29	Fibrocystin-L	Pkhd1l1	6	2614600	2781700	2990500	4099900	1949700	2434300	1751200	1895600	1711600	2146500	2351200	497180	2057500	404724	731956	601777	3121675	1676620	1.86189	0.896765	0.628471	0.0472721	2007700	948989	2.11562	1.08108	2.03026	0.0182628	NA	NA	NA	NA	NA	NA	2007700	3121675	0.643148	-0.636777	-0.827425	0.0100551	2007700	1676620	1.19747	0.259988	-0.0122911	0.34591
E1AZ71	Cyclic nucleotide-gated channel beta 1	Cngb1	2	27083000	26995000	5409400	9930000	7532800	12659000	9549700	7457000	7803300	6389900	3800300	4869700	4160000	4512300	3751800	5007300	17354350	5715800	3.03621	1.60227	1.56379	0.0330922	9299625	4357850	2.13399	1.09356	2.05662	0.000686443	4357850	5715800	0.762422	-0.391339	-0.866278	0.184841	9299625	17354350	0.535867	-0.900053	-1.26149	0.265225	9299625	5715800	1.627	0.702217	0.672626	0.0314959
Q61171	Peroxiredoxin-2	Prdx2	8	49746000	29619000	16790000	11260000	16368000	59962000	18232000	59893000	2799000	1844400	9640700	15227000	19163000	31290000	13107000	3797500	26853750	7377775	3.63982	1.86387	1.91061	0.0181919	38613750	16839375	2.29306	1.19728	2.27575	0.117567	16839375	7377775	2.28245	1.19058	1.7245	0.147078	38613750	26853750	1.43793	0.523991	1.08632	0.450604	38613750	7377775	5.23379	2.38786	3.28332	0.00863473
Q9CZB2	Melanocyte protein PMEL;M-alpha;M-beta	Pmel	4	4932500	6321700	3770000	3216500	13711000	3311700	2572000	1573400	1757600	18897000	3460600	1760300	663032	3195200	731956	2581800	4560175	6468875	0.704941	-0.504426	-1.22916	0.759403	5292025	1.793e+06	2.9515	1.56145	3.04515	0.119679	1.793e+06	6468875	0.277173	-1.85114	-3.25706	0.135512	5292025	4560175	1.16049	0.214731	0.576447	0.684087	5292025	6468875	0.818075	-0.289695	-0.863631	0.970196
Q9QX15	Calcium-activated chloride channel regulator 3A-1	Clca3a1	3	977408	816550	1488300	1824800	2427900	1625100	1250700	2016700	1832400	1597800	1629700	2004400	663032	404724	731956	601777	1.27676e+06	1766075	0.722939	-0.468054	-1.18094	0.0820886	1830100	600372	3.04828	1.60799	3.14349	0.00030035	600372	1766075	0.339947	-1.55662	-2.7747	5.36664e-05	1830100	1.27676e+06	1.43339	0.51943	1.0788	0.114445	1830100	1766075	1.03625	0.0513759	-0.335386	0.951379
E9Q9C6	Fc fragment of IgG-binding protein	Fcgbp	13	6217500	11548000	4220900	530790	8095600	7056900	6626500	4276500	1867100	11589000	3844600	1902400	1864800	396690	1070900	4408100	5.6293e+06	4800775	1.17258	0.229688	-0.255907	0.995285	6513875	1.93512e+06	3.36613	1.75109	3.44582	0.0109495	1.93512e+06	4800775	0.403085	-1.31084	-2.37219	0.129018	6513875	5.6293e+06	1.15714	0.210561	0.569573	0.358345	6513875	4800775	1.35684	0.440249	0.266894	0.176493
P23492	Purine nucleoside phosphorylase	Pnp	3	5023200	9657000	1386000	478172	2138700	12737000	3619400	14553000	697888	475176	425807	2223200	2559700	2136500	731956	601777	NA	NA	NA	NA	NA	NA	8262025	1.50748e+06	5.48067	2.45435	4.93163	0.0168307	NA	NA	NA	NA	NA	NA	8262025	4.13609e+06	1.99754	0.998227	1.86819	0.21794	8262025	955518	8.64665	3.11214	4.40508	0.00345571
Q61646	Haptoglobin;Haptoglobin alpha chain;Haptoglobin beta chain	Hp	24	2288100000	3490000000	2254100000	4556000000	334020000	445950000	2856600000	1417800000	8454600000	2434000000	2382800000	5209300000	1393200000	604280000	323230000	246060000	3147050000	4620175000	0.681154	-0.553947	-1.29481	0.386129	1263592500	641692500	1.96916	0.977577	1.81159	0.353551	641692500	4620175000	0.138889	-2.84799	-4.88964	0.00111982	1263592500	3147050000	0.401516	-1.31647	-1.94803	0.0289382	1263592500	4620175000	0.273495	-1.87042	-3.31183	0.0170327
P01837	Immunoglobulinkappa chain C region	Igkc	3	5944400	12824000	3809600	478172	2544600	676328	591593	567918	3383000	3033700	3789500	4399300	663032	404724	731956	601777	5.76404e+06	3651375	1.5786	0.658641	0.312779	0.932644	NA	NA	NA	NA	NA	NA	600372	3651375	0.164424	-2.60451	-4.49088	1.6689e-06	NA	NA	NA	NA	NA	NA	1.09511e+06	3651375	0.299917	-1.73736	-3.10576	0.00216769
A0A075B5V1	Immunoglobulinheavy chain V region J558;Immunoglobulinheavy chain V region MOPC 104E;Immunoglobulinheavy chain V region AC38 205.12	Ighv1-31	2	2746100	3588600	1378500	2804300	661377	676328	591593	567918	4000600	2697200	1605400	2254400	663032	404724	731956	601777	2629375	2639400	0.996202	-0.00549009	-0.567693	0.981043	NA	NA	NA	NA	NA	NA	600372	2639400	0.227465	-2.13628	-3.72404	0.000107864	624304	2629375	0.237434	-2.0744	-3.19762	0.000101928	624304	2639400	0.236533	-2.07989	-3.63625	6.50496e-05
A0A075B5P6	Immunoglobulinmu chain C region	Ighm	16	251710000	355150000	132340000	137140000	144100000	90871000	39860000	33488000	183860000	129850000	148800000	91795000	29568000	26313000	74036000	25046000	219085000	138576250	1.58097	0.660811	0.315655	0.151522	77079750	38740750	1.98963	0.9925	1.84311	0.14114	38740750	138576250	0.279563	-1.83876	-3.23677	0.000747587	77079750	219085000	0.351826	-1.50707	-2.26226	0.0154519	77079750	138576250	0.556226	-0.846256	-1.72562	0.0566651
Q61704	Inter-alpha-trypsin inhibitor heavy chain H3	Itih3	26	190470000	194650000	162810000	223910000	136820000	121380000	156450000	126100000	452260000	385980000	141880000	238760000	173530000	169160000	118180000	104580000	192960000	304720000	0.633237	-0.659182	-1.43433	0.168816	135187500	141362500	0.956318	-0.0644377	-0.389922	0.856929	141362500	304720000	0.463909	-1.10808	-2.04012	0.0267689	135187500	192960000	0.700599	-0.51334	-0.623916	0.00994132	135187500	304720000	0.443645	-1.17252	-2.23094	0.0175264
Q02819	Nucleobindin-1	Nucb1	7	4814900	7949200	4678000	5244600	3310600	3063500	3759900	6049000	1426000	1656300	1178500	1973400	6800100	4772500	2337500	3555900	5671675	1558550	3.63907	1.86357	1.91021	4.27893e-05	4045750	4366500	0.926543	-0.11007	-0.486332	0.878138	4366500	1558550	2.80164	1.48627	2.20876	0.00251808	4045750	5671675	0.713325	-0.487368	-0.581096	0.0940805	4045750	1558550	2.59584	1.3762	1.71648	0.000840517
Q91WG0	Acylcarnitine hydrolase	Ces2c	4	4790700	5287900	2132000	4365600	5345400	4029700	4777800	567918	697888	475176	5136700	497180	4140700	4463300	6710600	7775600	4144050	1.70174e+06	2.43519	1.28403	1.14189	0.0236925	3.6802e+06	5772550	0.637535	-0.649423	-1.62584	0.189896	5772550	1.70174e+06	3.39215	1.7622	2.66066	0.00750294	3.6802e+06	4144050	0.88807	-0.171255	-0.0599244	0.502647	NA	NA	NA	NA	NA	NA
E9QQ18	Proteoglycan 4;Proteoglycan 4 C-terminal part	Prg4	7	11139000	17810000	12422000	32213000	5490400	5494200	5338100	4554400	11309000	5495000	5271700	6094900	5604200	2208500	4478700	4288400	18396000	7042650	2.61208	1.3852	1.27602	0.0079471	5219275	4144950	1.25919	0.332495	0.448693	0.178302	4144950	7042650	0.58855	-0.764764	-1.47785	0.057867	5219275	18396000	0.283718	-1.81747	-2.77402	0.000753687	5219275	7042650	0.741095	-0.432269	-1.08445	0.201429
P11499	Heat shock protein HSP 90-beta	Hsp90ab1	2	4217900	5335100	4102200	4784100	661377	676328	591593	4448000	4497400	4321900	425807	4375300	663032	4754800	4402100	601777	4609825	3.4051e+06	1.3538	0.437014	0.0189566	0.244281	NA	NA	NA	NA	NA	NA	NA	NA	NA	NA	NA	NA	1.59432e+06	4609825	0.345854	-1.53177	-2.30299	0.008434	NA	NA	NA	NA	NA	NA
P26339	Chromogranin-A;Pancreastatin;Beta-granin;WE-14;Catestatin;GE-25;Serpinin-RRG;Serpinin;p-Glu serpinin precursor	Chga	3	2063100	1532000	1665400	1744300	1851900	1793200	591593	567918	2879900	1829500	3311200	1907700	1856900	404724	1524500	1410600	1751200	2482075	0.705539	-0.503203	-1.22754	0.0864623	NA	NA	NA	NA	NA	NA	1.29918e+06	2482075	0.523425	-0.933944	-1.75492	0.0495224	1.20115e+06	1751200	0.685903	-0.543924	-0.67434	0.116775	1.20115e+06	2482075	0.483931	-1.04713	-2.03673	0.0286196
P11352	Glutathione peroxidase 1;Glutathione peroxidase	Gpx1	6	16981000	12778000	9156700	5528300	8901700	17653000	6070900	13147000	697888	475176	6738100	7541400	8843900	15904000	731956	7396900	11111000	3.86314e+06	2.87616	1.52414	1.46022	0.0356136	11443150	8.21919e+06	1.39225	0.477416	0.754875	0.299487	NA	NA	NA	NA	NA	NA	11443150	11111000	1.02989	0.0424956	0.292485	0.914213	11443150	3.86314e+06	2.96214	1.56664	2.01143	0.0352092
Q91VB8	Hemoglobin subunit alpha	Hba-a1	10	8638700000	4938200000	3464400000	1920400000	3016200000	8418500000	3258100000	9154700000	572600000	471600000	1675500000	3118600000	3402300000	5224300000	2039800000	873940000	4740425000	1459575000	3.24781	1.69947	1.69265	0.0205555	5961875000	2885085000	2.06645	1.04715	1.95858	0.10363	2885085000	1459575000	1.97666	0.983065	1.38464	0.161077	5961875000	4740425000	1.25767	0.33075	0.767727	0.538283	5961875000	1459575000	4.08467	2.03022	2.72941	0.0092421
A0A0A6YW67	Ubiquitin-60S ribosomal protein L40;Ubiquitin;60S ribosomal protein L40;Ubiquitin-40S ribosomal protein S27a;Ubiquitin;40S ribosomal protein S27a;Polyubiquitin-B;Ubiquitin;Polyubiquitin-C;Ubiquitin;Ubiquitin-related 1;Ubiquitin-related 2	Gm8797;Uba52;Kxd1;Ubc;Ubb;Rps27a	3	11915000	7938300	5375100	3347600	3810000	10348000	5834000	15111000	2460700	475176	425807	4706400	5209400	8533700	731956	3680600	7144000	2.01702e+06	3.54186	1.82451	1.85842	0.0170842	8775750	4.53891e+06	1.93345	0.951175	1.75581	0.158773	NA	NA	NA	NA	NA	NA	8775750	7144000	1.22841	0.29679	0.711738	0.633027	8775750	2.01702e+06	4.35085	2.1213	2.87047	0.0128565
F6XLV1	Ciliary rootlet coiled-coil, rootletin family member 2	Crocc2	2	977408	816550	3467200	6822900	661377	4335200	5524900	6187100	4465000	3093500	6396400	4985700	6783300	5823400	8871000	5615900	3.02101e+06	4735150	0.637998	-0.648377	-1.42	0.119115	4.17714e+06	6773400	0.616698	-0.697363	-1.72713	0.152576	6773400	4735150	1.43045	0.51647	0.620478	0.0660172	NA	NA	NA	NA	NA	NA	4.17714e+06	4735150	0.882157	-0.180893	-0.695121	0.449245
Q01279	Epidermal growth factor receptor	Egfr	22	476770000	360370000	387340000	437220000	949050000	611630000	927480000	792390000	1008800000	658380000	770990000	798290000	972600000	900400000	789240000	733820000	415425000	809115000	0.513431	-0.961757	-1.83546	0.000895725	820137500	849015000	0.965987	-0.0499242	-0.359259	0.73133	849015000	809115000	1.04931	0.0694453	-0.111633	0.678932	820137500	415425000	1.97421	0.981278	1.84025	0.00072608	820137500	809115000	1.01362	0.019521	-0.384722	0.943411
P01592	Immunoglobulin J chain	Igj	5	21882000	23769000	10170000	12359000	12097000	10342000	7281000	2358000	13159000	10337000	8428200	6531700	4692100	3564800	6443900	9590700	17045000	9613975	1.77294	0.826144	0.534845	0.0487836	8019500	6072875	1.32054	0.401133	0.593707	0.642225	6072875	9613975	0.631672	-0.662753	-1.31078	0.0673903	8019500	17045000	0.47049	-1.08776	-1.57096	0.0513688	8019500	9613975	0.83415	-0.261621	-0.82015	0.397673
Q9Z121	C-C motif chemokine 8	Ccl8	3	3201300	3064200	1540300	2834000	661377	2457600	3838500	567918	5360800	4155700	425807	497180	663032	404724	1994700	601777	2659950	2.60987e+06	1.01919	0.0274203	-0.524062	0.375452	NA	NA	NA	NA	NA	NA	NA	NA	NA	NA	NA	NA	1.88135e+06	2659950	0.707287	-0.499632	-0.601315	0.196003	NA	NA	NA	NA	NA	NA
Q99JC1	Immunoglobulinlambda-3 chain C region;Immunoglobulinlambda-2 chain C region	Iglc3	2	4696000	2874200	1650200	1665500	2317800	1524500	1176900	567918	2256000	1584600	987510	1317800	837890	404724	1384300	1082100	2721475	1.53648e+06	1.77124	0.824762	0.533014	0.0910187	NA	NA	NA	NA	NA	NA	927253	1.53648e+06	0.603493	-0.728591	-1.41861	0.0829587	1.39678e+06	2721475	0.513244	-0.962284	-1.36409	0.0788886	1.39678e+06	1.53648e+06	0.909079	-0.137522	-0.627949	0.592742
[truncated: 6 more columns]
